# Supplementary material for: Functional and Multi-Omics Analysis of an Optimized CRISPR-Mediated FURIN Depletion in Cultured Pro-Monocytic Cells
Source: Preprints.org preprint supplement (doi:10.20944/preprints202312.0178.v1), 2023-12-04
Supplement: Supplementary file 1 [file ST1.xlsx]

## Sheet: ST1
Supplementary Table 1: Sequences of qPCR primers used for quantifying candidate gene expression
Gene	Forward	Reverse
CD68	5' GGAAATGCCACGGTTCATCCA 3'	5' TGGGGTTCAGTACAGAGATGC 3'
IL-10	5' GACTTTAAGGGTTACCTGGGTTG 3'	5' TCACATGCGCCTTGATGTCTG 3'
IL-6	5' ACTCACCTCTTCAGAACGAATTG 3'	5' CCATCTTTGGAAGGTTCAGGTTG 3'
INOS	5' TCTCTCGGCCACCTTTGATG 3'	5' GGAAGAGACCTGTGCCTTGA 3'
IL-23	5' CTCAGGGACAACAGTCAGTTC 3'	5' ACAGGGCTATCAGGGAGCA 3'
VCam1	5' GGGAAGATGGTCGTGATCCTT 3'	5' TCTGGGGTGGTCTCGATTTTA 3'
IL-8	5' TTTTGCCAAGGAGTGCTAAAGA 3'	5' AACCCTCTGCACCCAGTTTTC 3'
COX 2	5' CTGGCGCTCAGCCATACAG 3'	5' CGCACTTATACTGGTCAAATCCC 3'
COX 1	5' CGCCAGTGAATCCCTGTTGTT 3'	5' AAGGTGGCATTGACAAACTCC 3'
AMAC1	5' GTTGACTATTCTGAAACCAGCCC 3'	5' GTCGCTGATGTATTTCTGGACCC 3'
LPL	5' TCATTCCCGGAGTAGCAGAGT 3'	5' GGCCACAAGTTTTGGCACC 3'
TGFB	5' GGCCAGATCCTGTCCAAGC 3'	5' GTGGGTTTCCACCATTAGCAC 3'
