# Supplementary material for: Functional and Multi-Omics Analysis of an Optimized CRISPR-Mediated FURIN Depletion in Cultured Pro-Monocytic Cells
Source: Preprints.org preprint supplement (doi:10.20944/preprints202312.0178.v1), 2023-12-04
Supplement: Supplementary file 1 [file supplementary]

## **File description for Supplementary Figures and Tables:**

**Figure S1a:** Design of plasmid vector used for CRISPR studies

**Figure S1b:** Design of guide RNA sequences for targeting *FURIN* via CRISPR

**Figure S2:** Schematic of plasmid construction expressing GFP and two guide RNAs

**Figure S3:** FACS analysis of U937 cell transfections

**Figure S4a:** Design of sequencing primers to verify *FURIN* gene status in U937 cells

**Figure S4b:** Results from DNA sequencing of U937 clones subjected to CRISPR-mediated *FURIN* gene modification

**Figure S5:** Principal components analysis (PCA) of gene expression in WT, HZ and NZ U937 clones

**ST1** – Sequences of PCR primers used for quantifying candidate gene expression

**ST2** - Differentially gene expression analysis using limma

**ST3** – Gene Set Enrichment Analysis (GSEA) results

**ST4** – Results from Self Organizing Maps (SOM) analysis

**ST5** – Pathway enrichment analysis of SOM clusters

**ST6** – Cytokine secretion data from proteomics study
