# Supplementary material for: Functional and Multi-Omics Analysis of an Optimized CRISPR-Mediated FURIN Depletion in Cultured Pro-Monocytic Cells
Source: Preprints.org preprint supplement (doi:10.20944/preprints202312.0178.v1), 2023-12-04
Supplement: Supplementary file 2 [file ST2.xlsx]

## Sheet: ST2
Supplementary Table 2: Differentialy gene expression analysis using limma. Results are reported for 2 comparisons (HZ vs WT, blue highlight; NZ vs WT, yellow highlight). Columns for each comparison are as follows: Col 1, gene symbol; col 2, gene entrez id; col 3, gene ensembl id; col 4, chromosome location of gene; col 5, log fold-change; col 6, average gene expression (log2); col 7, t-statistic …
SYMBOL	ENTREZID	ENSEMBL	TXCHROM	logFC	AveExpr	t	P.Value	adj.P.Val	comp		SYMBOL	ENTREZID	ENSEMBL	TXCHROM	logFC	AveExpr	t	P.Value	adj.P.Val	comp
AIG1	51390	ENSG00000146416	chr6	3.04551	5.70724	49.5622	4.25959e-16	5.78537e-12	HeterovsWT		LAMP5	24141	ENSG00000125869	chr20	-5.17095	6.55506	-62.0408	2.38306e-17	3.23668e-13	HomovsWT
SNHG14	104472715	NA	chr15	4.17866	5.41758	46.3574	1.00381e-15	6.81687e-12	HeterovsWT		PDK1	5163	ENSG00000152256	chr2	-3.4557	9.32955	-53.5038	1.5955e-16	1.08351e-12	HomovsWT
GPD2	2820	ENSG00000115159	chr2	2.78097	4.63067	42.063	3.48759e-15	1.57895e-11	HeterovsWT		IRF8	3394	ENSG00000140968	chr16	-3.18456	5.96363	-49.8137	3.99176e-16	1.22071e-12	HomovsWT
SPOCK1	6695	ENSG00000152377	chr5	-2.53441	4.90704	-40.3577	5.92362e-15	1.74889e-11	HeterovsWT		AL031123.1	NA	NA	chr6	-3.48913	5.51031	-49.8276	3.97754e-16	1.22071e-12	HomovsWT
LINC00426	100188949	ENSG00000238121	chr13	2.43582	5.47968	40.0958	6.43827e-15	1.74889e-11	HeterovsWT		CST7	8530	ENSG00000077984	chr20	-2.7911	7.92769	-48.0402	6.35481e-16	1.23301e-12	HomovsWT
HS3ST2	9956	ENSG00000122254	chr16	-2.91515	5.13525	-39.3449	8.19988e-15	1.85618e-11	HeterovsWT		PPARGC1A	10891	ENSG00000109819	chr4	-3.83552	4.93928	-48.5947	5.48508e-16	1.23301e-12	HomovsWT
CD93	22918	ENSG00000125810	chr20	-1.6792	9.78659	-38.0108	1.27463e-14	2.43105e-11	HeterovsWT		UNC5C	8633	ENSG00000182168	chr4	-4.51501	4.80692	-49.3558	4.49384e-16	1.22071e-12	HomovsWT
AC079781.5	NA	NA	chr7	-2.08271	5.83995	-37.6664	1.43193e-14	2.43105e-11	HeterovsWT		ELANE	1991	ENSG00000197561	chr19	-4.01713	7.04371	-45.9465	1.12516e-15	1.91024e-12	HomovsWT
POU2F2	5452	ENSG00000028277	chr19	3.8681	3.75514	36.7772	1.94318e-14	2.93247e-11	HeterovsWT		COL23A1	91522	ENSG00000050767	chr5	-2.87473	7.25412	-45.4309	1.30025e-15	1.96222e-12	HomovsWT
AC007100.1	NA	NA	chr2	-2.5739	3.75711	-36.089	2.47348e-14	3.35949e-11	HeterovsWT		SPOCK1	6695	ENSG00000152377	chr5	-2.72522	4.90704	-42.0761	3.47376e-15	4.40303e-12	HomovsWT
GATM	2628	ENSG00000171766	chr15	-3.11852	3.51822	-33.6536	6.03414e-14	7.45052e-11	HeterovsWT		LIPA	3988	ENSG00000107798	chr10	-3.12909	5.50319	-40.9476	4.91978e-15	5.43529e-12	HomovsWT
FRG1-DT	728339	ENSG00000281787	chr4	-5.28277	1.98559	-33.1295	7.37148e-14	8.34328e-11	HeterovsWT		TMEM163	81615	ENSG00000152128	chr2	-1.94924	7.41764	-39.5676	7.62884e-15	6.90766e-12	HomovsWT
IGLL1	3543	ENSG00000128322	chr22	6.88187	3.01772	32.0128	1.14119e-13	1.19228e-10	HeterovsWT		CD93	22918	ENSG00000125810	chr20	-1.71207	9.78659	-38.7281	1.00362e-14	8.5195e-12	HomovsWT
AC090796.1	NA	NA	chr8	4.69776	1.68036	30.5522	2.06831e-13	2.00656e-10	HeterovsWT		TIAM1	7074	ENSG00000156299	chr21	-5.4867	4.49922	-41.9901	3.56599e-15	4.40303e-12	HomovsWT
IRAK1	3654	ENSG00000184216	chrX	-1.68719	8.3354	-30.2064	2.39068e-13	2.16468e-10	HeterovsWT		AC079781.5	NA	NA	chr7	-2.11944	5.83995	-38.1969	1.19747e-14	9.56708e-12	HomovsWT
OGT	8473	ENSG00000147162	chrX	-1.23278	8.70929	-29.9547	2.65923e-13	2.25735e-10	HeterovsWT		AGPAT4	56895	ENSG00000026652	chr6	-4.6633	4.38777	-39.7884	7.10457e-15	6.89244e-12	HomovsWT
SMC1B	27127	ENSG00000077935	chr22	2.92734	3.42825	29.565	3.14114e-13	2.473e-10	HeterovsWT		PKP4	8502	ENSG00000144283	chr2	-4.75373	4.43933	-40.7693	5.20238e-15	5.43529e-12	HomovsWT
NAV3	89795	ENSG00000067798	chr12	6.52301	0.935889	29.4664	3.27742e-13	2.473e-10	HeterovsWT		FRMD3	257019	ENSG00000172159	chr9	-2.03217	6.83652	-37.3023	1.62117e-14	1.16192e-11	HomovsWT
CD36	948	ENSG00000135218	chr7	-5.23557	2.68706	-29.3184	3.49412e-13	2.49774e-10	HeterovsWT		PHACTR3	116154	ENSG00000087495	chr20	-2.20214	6.30955	-37.1453	1.71097e-14	1.16192e-11	HomovsWT
KIF18B	146909	ENSG00000186185	chr17	1.60928	6.59156	29.0294	3.96284e-13	2.69116e-10	HeterovsWT		SNHG14	104472715	NA	chr15	3.40785	5.41758	37.2052	1.67611e-14	1.16192e-11	HomovsWT
PPARGC1A	10891	ENSG00000109819	chr4	-1.52577	4.93928	-28.2029	5.71987e-13	3.619e-10	HeterovsWT		CKAP4	10970	ENSG00000136026	chr12	-2.0015	6.0086	-36.1995	2.37875e-14	1.40471e-11	HomovsWT
NMT1	4836	ENSG00000136448	chr17	1.473	6.80317	28.1484	5.86203e-13	3.619e-10	HeterovsWT		GALK2	2585	ENSG00000156958	chr15	-1.6021	6.94077	-36.2561	2.33179e-14	1.40471e-11	HomovsWT
NWD1	284434	ENSG00000188039	chr19	-1.76359	4.66027	-27.8703	6.6494e-13	3.91107e-10	HeterovsWT		SLC25A12	8604	ENSG00000115840	chr2	-1.76915	7.23602	-36.0404	2.51649e-14	1.42412e-11	HomovsWT
FCER2	2208	ENSG00000104921	chr19	-1.96536	2.94399	-27.7657	6.97449e-13	3.91107e-10	HeterovsWT		FMNL2	114793	ENSG00000157827	chr2	-3.89757	4.37763	-36.4953	2.14392e-14	1.3866e-11	HomovsWT
LINC01550	388011	ENSG00000246223	chr14	-2.85585	0.383513	-27.5291	7.77491e-13	3.91107e-10	HeterovsWT		GPNMB	10457	ENSG00000136235	chr7	-2.61086	7.68991	-35.2554	3.33365e-14	1.75827e-11	HomovsWT
TFRC	7037	ENSG00000072274	chr3	-1.15101	8.62141	-27.6706	7.28495e-13	3.91107e-10	HeterovsWT		LYZ	4069	ENSG00000090382	chr12	-3.08581	6.07427	-34.9702	3.69792e-14	1.75827e-11	HomovsWT
FLT3	2322	ENSG00000122025	chr13	4.04587	2.4187	27.5848	7.57795e-13	3.91107e-10	HeterovsWT		TRMT11	60487	ENSG00000066651	chr6	-2.46115	5.78019	-34.9288	3.75422e-14	1.75827e-11	HomovsWT
TRIM4	89122	ENSG00000146833	chr7	-1.29297	6.68922	-26.99	9.99174e-13	4.84671e-10	HeterovsWT		FURIN	5045	ENSG00000140564	chr15	-3.11003	6.13112	-34.6701	4.12785e-14	1.86882e-11	HomovsWT
GPC5	2262	ENSG00000179399	chr13	5.62316	2.1925	26.8862	1.0492e-12	4.91386e-10	HeterovsWT		LINC01169	102723165	ENSG00000259471	chr15	-3.63043	4.78947	-35.0112	3.64294e-14	1.75827e-11	HomovsWT
PLPPR3	79948	ENSG00000129951	chr19	-3.09755	3.71225	-26.6969	1.14755e-12	5.19534e-10	HeterovsWT		KIF18B	146909	ENSG00000186185	chr17	1.89902	6.59156	34.5807	4.26622e-14	1.86915e-11	HomovsWT
MAMLD1	10046	ENSG00000013619	chrX	-2.49416	3.47578	-25.8036	1.76618e-12	7.73814e-10	HeterovsWT		GATM	2628	ENSG00000171766	chr15	-3.92221	3.51822	-35.0281	3.62064e-14	1.75827e-11	HomovsWT
NEGR1	257194	ENSG00000172260	chr1	-3.01435	4.84947	-24.7948	2.92538e-12	1.05737e-09	HeterovsWT		NWD1	284434	ENSG00000188039	chr19	-2.27932	4.66027	-33.297	6.91229e-14	2.68545e-11	HomovsWT
PADI2	11240	ENSG00000117115	chr1	-1.77596	3.68462	-24.7728	2.95832e-12	1.05737e-09	HeterovsWT		AC078883.1	NA	NA	chr2	-3.78337	4.2886	-34.2195	4.87778e-14	2.07031e-11	HomovsWT
FAM135B	51059	ENSG00000147724	chr8	-3.37528	1.65369	-24.8795	2.80181e-12	1.05737e-09	HeterovsWT		GNS	2799	ENSG00000135677	chr12	-1.57162	7.40181	-33.294	6.92025e-14	2.68545e-11	HomovsWT
SORCS2	57537	ENSG00000184985	chr4	-1.22069	6.51977	-24.9629	2.68576e-12	1.05737e-09	HeterovsWT		MAN1C1	57134	ENSG00000117643	chr1	2.10147	5.23884	33.0459	7.6128e-14	2.73113e-11	HomovsWT
MARCKSL1	65108	ENSG00000175130	chr1	5.43162	3.92167	24.8373	2.8626e-12	1.05737e-09	HeterovsWT		EMID1	129080	ENSG00000186998	chr22	2.79709	5.19763	32.8145	8.3264e-14	2.73113e-11	HomovsWT
RYR2	6262	ENSG00000198626	chr1	-8.70525	-0.101517	-24.9153	2.75141e-12	1.05737e-09	HeterovsWT		GABPB1-AS1	100129387	NA	chr15	-1.74893	6.58491	-32.8483	8.21774e-14	2.73113e-11	HomovsWT
CYB5A	1528	ENSG00000166347	chr18	8.93758	0.110764	24.975	2.66938e-12	1.05737e-09	HeterovsWT		TLN2	83660	ENSG00000171914	chr15	-1.73701	6.75119	-32.7779	8.44556e-14	2.73113e-11	HomovsWT
AL136018.1	NA	NA	chr14	2.65817	2.88644	24.7103	3.05439e-12	1.06371e-09	HeterovsWT		PADI2	11240	ENSG00000117115	chr1	-3.06877	3.68462	-33.0521	7.5947e-14	2.73113e-11	HomovsWT
AC008957.1	NA	NA	chr5	-2.53457	3.45796	-24.5856	3.25607e-12	1.07998e-09	HeterovsWT		NABP1	64859	ENSG00000173559	chr2	-1.73074	6.16378	-32.5559	9.20965e-14	2.84285e-11	HomovsWT
CTPS2	56474	ENSG00000047230	chrX	5.81783	2.51395	24.5832	3.26013e-12	1.07998e-09	HeterovsWT		ZNF275	10838	ENSG00000063587	chrX	-1.89641	6.36815	-32.5705	9.15741e-14	2.84285e-11	HomovsWT
MPP1	4354	ENSG00000130830	chrX	-1.37784	5.7889	-24.4011	3.58131e-12	1.15017e-09	HeterovsWT		SMYD3	64754	ENSG00000185420	chr1	-1.40317	7.67063	-32.4467	9.61279e-14	2.90135e-11	HomovsWT
FRMD3	257019	ENSG00000172159	chr9	-1.24992	6.83652	-24.369	3.64139e-12	1.15017e-09	HeterovsWT		TNN	63923	ENSG00000120332	chr1	-2.058	6.01458	-32.2288	1.04748e-13	3.0928e-11	HomovsWT
AL589693.1	NA	NA	chr6	-2.10302	3.40198	-24.042	4.31881e-12	1.33314e-09	HeterovsWT		DYNC1I2	1781	ENSG00000077380	chr2	-1.7294	7.52679	-31.9862	1.15332e-13	3.26343e-11	HomovsWT
KCNH2	3757	ENSG00000055118	chr7	9.94263	-2.3554	23.9015	4.65064e-12	1.40367e-09	HeterovsWT		HSPA8	3312	ENSG00000109971	chr11	1.49484	9.29656	31.7045	1.2909e-13	3.57815e-11	HomovsWT
VIT	5212	ENSG00000205221	chr2	-1.58955	1.29414	-23.5314	5.66293e-12	1.67204e-09	HeterovsWT		MPP1	4354	ENSG00000130830	chrX	-1.87218	5.7889	-31.3767	1.47364e-13	3.92451e-11	HomovsWT
EMID1	129080	ENSG00000186998	chr22	2.0633	5.19763	23.4866	5.80067e-12	1.67627e-09	HeterovsWT		CYTH4	27128	ENSG00000100055	chr22	2.29569	4.38823	31.1152	1.63936e-13	4.15937e-11	HomovsWT
CTSG	1511	ENSG00000100448	chr14	1.64917	9.02926	23.3755	6.15846e-12	1.74259e-09	HeterovsWT		ITGA6	3655	ENSG00000091409	chr2	-2.12748	6.26211	-30.9201	1.77599e-13	4.3074e-11	HomovsWT
PPP1R27	116729	ENSG00000182676	chr17	4.00281	2.42246	23.1401	6.99666e-12	1.90057e-09	HeterovsWT		SCCPDH	51097	ENSG00000143653	chr1	-1.52517	7.78419	-31.0939	1.65371e-13	4.15937e-11	HomovsWT
KIAA1211L	NA	NA	chr2	5.49608	1.31917	23.1645	6.90439e-12	1.90057e-09	HeterovsWT		ZNF438	220929	ENSG00000183621	chr10	-2.01307	7.18096	-30.961	1.7464e-13	4.3074e-11	HomovsWT
LMO1	4004	ENSG00000166407	chr11	-1.34784	5.29247	-23.0268	7.44322e-12	1.92141e-09	HeterovsWT		LMO1	4004	ENSG00000166407	chr11	-1.93442	5.29247	-30.7392	1.91373e-13	4.37935e-11	HomovsWT
CTSH	1512	ENSG00000103811	chr15	-1.23044	6.47907	-22.9586	7.72707e-12	1.92141e-09	HeterovsWT		STS	412	ENSG00000101846	chrX	-2.42398	5.41068	-30.713	1.93463e-13	4.37935e-11	HomovsWT
HIP1	3092	ENSG00000127946	chr7	-1.04945	7.36402	-22.946	7.78071e-12	1.92141e-09	HeterovsWT		SLCO4C1	353189	ENSG00000173930	chr5	2.58552	5.26873	30.5848	2.04043e-13	4.54313e-11	HomovsWT
AFF2	2334	ENSG00000155966	chrX	-1.40793	8.50786	-22.9882	7.60241e-12	1.92141e-09	HeterovsWT		NMT1	4836	ENSG00000136448	chr17	1.60231	6.80317	30.7442	1.90976e-13	4.37935e-11	HomovsWT
CADM1	23705	ENSG00000182985	chr11	-8.94917	-2.15075	-23.0048	7.53349e-12	1.92141e-09	HeterovsWT		HSPG2	3339	ENSG00000142798	chr1	-2.14164	5.76062	-30.4915	2.12133e-13	4.55258e-11	HomovsWT
CD70	970	ENSG00000125726	chr19	-2.41997	3.12039	-22.8712	8.10725e-12	1.9663e-09	HeterovsWT		OGT	8473	ENSG00000147162	chrX	-1.26826	8.70929	-30.786	1.87704e-13	4.37935e-11	HomovsWT
OLFML2A	169611	ENSG00000185585	chr9	3.1371	2.70383	22.8136	8.36903e-12	1.97116e-09	HeterovsWT		ARHGEF10L	55160	ENSG00000074964	chr1	-3.00771	4.85307	-30.4052	2.19922e-13	4.59535e-11	HomovsWT
KANK4	163782	ENSG00000132854	chr1	3.92851	1.56302	22.7419	8.70783e-12	1.97116e-09	HeterovsWT		AC008875.3	NA	NA	chr5	3.45185	4.17701	30.4898	2.12284e-13	4.55258e-11	HomovsWT
PAK2	5062	ENSG00000180370	chr3	-1.19889	7.5842	-22.7454	8.69109e-12	1.97116e-09	HeterovsWT		PLAC8	51316	ENSG00000145287	chr4	-4.36996	4.37226	-31.2962	1.5226e-13	3.97692e-11	HomovsWT
PGK1	5230	ENSG00000102144	chrX	-0.9006	9.33708	-22.7651	8.59658e-12	1.97116e-09	HeterovsWT		SORCS2	57537	ENSG00000184985	chr4	-1.51933	6.51977	-30.3187	2.2804e-13	4.69279e-11	HomovsWT
TIAM1	7074	ENSG00000156299	chr21	-1.32824	4.49922	-22.7026	8.89935e-12	1.98149e-09	HeterovsWT		AFF2	2334	ENSG00000155966	chrX	-1.89307	8.50786	-30.4647	2.14523e-13	4.55258e-11	HomovsWT
NHSL1	57224	ENSG00000135540	chr6	-1.40003	6.04384	-22.6224	9.30523e-12	2.03845e-09	HeterovsWT		GPRIN3	285513	ENSG00000185477	chr4	-3.91749	4.56036	-30.265	2.33245e-13	4.72825e-11	HomovsWT
MTERF1	7978	ENSG00000127989	chr7	-1.97199	4.40652	-22.4767	1.00938e-11	2.16537e-09	HeterovsWT		CD36	948	ENSG00000135218	chr7	-3.23495	2.68706	-29.8785	2.74676e-13	5.48624e-11	HomovsWT
BLACE	338436	ENSG00000204960	chr7	-1.18288	5.66433	-22.4575	1.02035e-11	2.16537e-09	HeterovsWT		LSP1	4046	ENSG00000288199	chr11	1.76704	6.85274	29.8249	2.81018e-13	5.53158e-11	HomovsWT
PRTN3	5657	ENSG00000196415	chr19	1.91327	5.09643	22.4181	1.0431e-11	2.1796e-09	HeterovsWT		USP44	84101	ENSG00000136014	chr12	2.58136	4.5661	29.2721	3.56503e-13	6.54327e-11	HomovsWT
ZNF714	148206	ENSG00000160352	chr19	-2.34919	2.98529	-22.3286	1.09702e-11	2.23293e-09	HeterovsWT		UPB1	51733	ENSG00000100024	chr22	2.42816	4.69263	29.1655	3.73424e-13	6.76245e-11	HomovsWT
EBF4	57593	ENSG00000088881	chr20	4.03017	2.82282	22.2951	1.11795e-11	2.23293e-09	HeterovsWT		SMAD3	4088	ENSG00000166949	chr15	-1.34999	6.96334	-29.3649	3.42433e-13	6.37113e-11	HomovsWT
SNRNP200	23020	ENSG00000144028	chr2	1.0039	9.26322	22.2989	1.11552e-11	2.23293e-09	HeterovsWT		H2AFV	NA	NA	chr7	1.24195	8.67472	29.4807	3.25722e-13	6.14439e-11	HomovsWT
CLDN5	7122	ENSG00000184113	chr22	5.13983	1.45064	22.2295	1.16017e-11	2.28369e-09	HeterovsWT		KCNN2	3781	ENSG00000080709	chr5	-2.51264	4.37256	-29.0712	3.89102e-13	6.95366e-11	HomovsWT
PRDM13	59336	ENSG00000112238	chr6	8.21266	-0.176468	22.1694	1.20035e-11	2.32902e-09	HeterovsWT		AC104088.1	NA	NA	chr2	-5.93513	3.35729	-32.8289	8.27978e-14	2.73113e-11	HomovsWT
UNC5C	8633	ENSG00000182168	chr4	-1.12648	4.80692	-22.0681	1.27159e-11	2.4325e-09	HeterovsWT		TMEM255B	348013	ENSG00000184497	chr13	-1.98787	4.94659	-28.563	4.86845e-13	8.47734e-11	HomovsWT
FCAR	2204	ENSG00000284245	chr19	-2.27538	3.13162	-21.9955	1.32541e-11	2.46599e-09	HeterovsWT		AC007100.1	NA	NA	chr2	-7.81201	3.75711	-33.5506	6.27479e-14	2.58255e-11	HomovsWT
SLC40A1	30061	ENSG00000138449	chr2	4.48413	1.19939	21.9977	1.32375e-11	2.46599e-09	HeterovsWT		MBNL2	10150	ENSG00000139793	chr13	-6.08855	3.96618	-31.4511	1.42981e-13	3.88393e-11	HomovsWT
FCGR2B	2213	ENSG00000072694	chr1	-4.08349	0.706931	-21.9587	1.35363e-11	2.48446e-09	HeterovsWT		MIR3681HG	100506457	ENSG00000224184	chr2	2.9007	4.01225	28.474	5.06543e-13	8.70869e-11	HomovsWT
ASPH	444	ENSG00000198363	chr8	-1.66421	1.64075	-21.7741	1.50521e-11	2.72584e-09	HeterovsWT		RPS6KA2	6196	ENSG00000071242	chr6	-1.35336	6.39893	-28.3155	5.43742e-13	9.23138e-11	HomovsWT
AL133538.1	NA	NA	chr6	-1.74703	4.87783	-21.7224	1.55086e-11	2.73555e-09	HeterovsWT		PLPPR3	79948	ENSG00000129951	chr19	-3.98544	3.71225	-28.1829	5.77162e-13	9.67779e-11	HomovsWT
AGPAT4	56895	ENSG00000026652	chr6	-1.34891	4.38777	-21.7414	1.53394e-11	2.73555e-09	HeterovsWT		FCER2	2208	ENSG00000104921	chr19	-6.29742	2.94399	-32.8505	8.21056e-14	2.73113e-11	HomovsWT
PSMA1	5682	ENSG00000129084	chr11	1.88965	3.33153	21.6635	1.60471e-11	2.75888e-09	HeterovsWT		GOLGA2P11	255180	NA	chr15	-1.70543	4.98056	-28.0241	6.2008e-13	1.02657e-10	HomovsWT
RAB31	11031	ENSG00000168461	chr18	0.943387	6.95586	21.6658	1.60253e-11	2.75888e-09	HeterovsWT		PTPN18	26469	ENSG00000072135	chr2	-1.69529	5.28372	-27.9746	6.34154e-13	1.02657e-10	HomovsWT
IL31RA	133396	ENSG00000164509	chr5	-1.85663	3.11915	-21.639	1.6277e-11	2.76343e-09	HeterovsWT		NBPF17P	401967	ENSG00000179571	chr1	-1.85842	5.34662	-27.9683	6.35984e-13	1.02657e-10	HomovsWT
SIPA1L2	57568	ENSG00000116991	chr1	-1.23094	5.6157	-21.5865	1.67812e-11	2.81386e-09	HeterovsWT		ASS1	445	ENSG00000130707	chr9	-1.44134	7.59349	-27.946	6.42455e-13	1.02657e-10	HomovsWT
RLIM	51132	ENSG00000131263	chrX	-0.916466	7.58343	-21.5512	1.71302e-11	2.83735e-09	HeterovsWT		LINC00894	NA	NA	chrX	-2.17715	4.165	-27.5732	7.61841e-13	1.15346e-10	HomovsWT
PSAT1	29968	ENSG00000135069	chr9	-1.12902	8.664	-21.5095	1.75525e-11	2.87226e-09	HeterovsWT		AL133538.1	NA	NA	chr6	-2.47741	4.87783	-27.5549	7.68288e-13	1.15346e-10	HomovsWT
JUP	3728	ENSG00000173801	chr17	2.53415	3.62287	21.3705	1.90412e-11	3.07878e-09	HeterovsWT		IL31RA	133396	ENSG00000164509	chr5	-4.4743	3.11915	-28.652	4.67988e-13	8.25483e-11	HomovsWT
NEAT1	283131	ENSG00000245532	chr11	-0.852073	8.58612	-21.3145	1.96801e-11	3.14464e-09	HeterovsWT		NTRK3	4916	ENSG00000140538	chr15	-3.08047	3.801	-27.5912	7.55551e-13	1.15346e-10	HomovsWT
NSMAF	8439	ENSG00000035681	chr8	-1.1657	8.13049	-21.2723	2.0176e-11	3.18641e-09	HeterovsWT		NHSL1	57224	ENSG00000135540	chr6	-1.77532	6.04384	-27.5821	7.5874e-13	1.15346e-10	HomovsWT
CALN1	83698	ENSG00000183166	chr7	-2.2955	2.32706	-21.2426	2.05321e-11	3.20537e-09	HeterovsWT		FMNL1	752	ENSG00000184922	chr17	1.82681	6.15355	27.5421	7.72822e-13	1.15346e-10	HomovsWT
TSPAN4	7106	ENSG00000214063	chr11	2.28727	5.14445	21.2061	2.09811e-11	3.21312e-09	HeterovsWT		TMEM132B	114795	ENSG00000139364	chr12	-1.75485	5.46773	-27.4413	8.09642e-13	1.18243e-10	HomovsWT
NFAM1	150372	ENSG00000235568	chr22	1.30188	6.35812	21.2001	2.10549e-11	3.21312e-09	HeterovsWT		COL28A1	340267	ENSG00000215018	chr7	-3.71646	3.43381	-27.7935	6.88666e-13	1.08761e-10	HomovsWT
ZNF275	10838	ENSG00000063587	chrX	-1.1496	6.36815	-21.13	2.19498e-11	3.31247e-09	HeterovsWT		ANPEP	290	ENSG00000166825	chr15	-1.34674	7.74278	-27.4936	7.90319e-13	1.16675e-10	HomovsWT
ARHGEF9	23229	ENSG00000131089	chrX	-1.29152	5.02373	-21.0494	2.30283e-11	3.43703e-09	HeterovsWT		NAV2	89797	ENSG00000166833	chr11	-1.76212	5.93839	-27.2114	9.00818e-13	1.28789e-10	HomovsWT
DENND5B	160518	ENSG00000170456	chr12	7.28424	-0.666652	21.0149	2.35073e-11	3.47039e-09	HeterovsWT		IFIH1	64135	ENSG00000115267	chr2	-1.89996	4.80221	-26.751	1.11849e-12	1.48548e-10	HomovsWT
IP6K2	51447	ENSG00000068745	chr3	1.15092	6.05938	20.9083	2.50557e-11	3.61232e-09	HeterovsWT		GCA	25801	ENSG00000115271	chr2	-3.48992	3.55124	-27.1342	9.33881e-13	1.30763e-10	HomovsWT
TAF1	6872	ENSG00000147133	chrX	-0.972416	7.133	-20.9275	2.47692e-11	3.61232e-09	HeterovsWT		CPM	1368	ENSG00000135678	chr12	-3.7454	3.42698	-27.1472	9.28218e-13	1.30763e-10	HomovsWT
LINC01685	105378656	NA	chr1	-3.96282	-0.689403	-20.8943	2.52666e-11	3.61232e-09	HeterovsWT		NDFIP1	80762	ENSG00000131507	chr5	-1.21418	6.692	-26.7408	1.12387e-12	1.48548e-10	HomovsWT
ABCD1	215	ENSG00000101986	chrX	-1.31167	5.2096	-20.8514	2.59278e-11	3.66824e-09	HeterovsWT		GM2A	2760	ENSG00000196743	chr5	-1.24601	6.90309	-26.7522	1.1178e-12	1.48548e-10	HomovsWT
AC106729.1	NA	NA	chr16	-7.60767	-1.81193	-20.7767	2.71215e-11	3.79757e-09	HeterovsWT		PRNP	5621	ENSG00000171867	chr20	-1.35785	6.87974	-26.7027	1.14437e-12	1.49451e-10	HomovsWT
MAP7	9053	ENSG00000135525	chr6	-1.85359	3.2931	-20.6267	2.96999e-11	4.07459e-09	HeterovsWT		PAK2	5062	ENSG00000180370	chr3	-1.42561	7.5842	-26.7499	1.11906e-12	1.48548e-10	HomovsWT
DOCK3	1795	ENSG00000088538	chr3	-1.72371	4.48722	-20.635	2.9551e-11	4.07459e-09	HeterovsWT		CBX5	23468	ENSG00000094916	chr12	1.63361	8.98857	26.7512	1.11836e-12	1.48548e-10	HomovsWT
CD99L2	83692	ENSG00000102181	chrX	-1.0209	6.34482	-20.5519	3.10839e-11	4.22181e-09	HeterovsWT		AC093627.4	NA	NA	chr7	1.69642	5.0322	26.2398	1.42828e-12	1.77972e-10	HomovsWT
SLC25A5	292	ENSG00000005022	chrX	-1.05917	8.72881	-20.3449	3.52878e-11	4.74533e-09	HeterovsWT		ZNF185	7739	ENSG00000147394	chrX	-5.0695	3.59744	-27.3551	8.42618e-13	1.21749e-10	HomovsWT
KCNQ5	56479	ENSG00000185760	chr6	-1.33515	7.90256	-20.2888	3.65314e-11	4.86441e-09	HeterovsWT		ASB2	51676	ENSG00000100628	chr14	-1.61279	5.32398	-26.1862	1.4658e-12	1.80987e-10	HomovsWT
NABP1	64859	ENSG00000173559	chr2	-1.00508	6.16378	-20.2426	3.75889e-11	4.95662e-09	HeterovsWT		TRIM4	89122	ENSG00000146833	chr7	-1.26148	6.68922	-26.3994	1.32265e-12	1.66336e-10	HomovsWT
IDH3A	3419	ENSG00000166411	chr15	-1.06004	5.78908	-20.1758	3.91765e-11	5.1163e-09	HeterovsWT		CTH	1491	ENSG00000116761	chr1	-1.53579	5.36977	-26.1089	1.52176e-12	1.86203e-10	HomovsWT
TRGC1	6966	ENSG00000211689	chr7	-1.89975	2.92739	-20.08	4.15815e-11	5.37601e-09	HeterovsWT		RAB27B	5874	ENSG00000041353	chr18	2.68528	5.08802	26.0546	1.56239e-12	1.89467e-10	HomovsWT
SLC22A20P	440044	ENSG00000197847	chr11	1.53091	4.97298	20.0506	4.23526e-11	5.37601e-09	HeterovsWT		SPAG6	9576	ENSG00000077327	chr10	2.6011	4.34907	25.945	1.64804e-12	1.92317e-10	HomovsWT
GOLGA2P11	255180	NA	chr15	-1.13379	4.98056	-20.0533	4.22809e-11	5.37601e-09	HeterovsWT		DLX1	1745	ENSG00000144355	chr2	-1.88048	6.02588	-26.0013	1.60343e-12	1.92317e-10	HomovsWT
RHOBTB1	9886	ENSG00000072422	chr10	1.69961	4.09932	19.9835	4.4167e-11	5.51156e-09	HeterovsWT		IRS1	3667	ENSG00000169047	chr2	1.92286	4.77074	25.8434	1.73203e-12	1.97685e-10	HomovsWT
HSBP1L1	440498	ENSG00000226742	chr18	2.51575	3.64172	19.9618	4.47707e-11	5.51156e-09	HeterovsWT		STXBP5L	9515	ENSG00000145087	chr3	-1.81563	4.61132	-25.8194	1.75254e-12	1.98358e-10	HomovsWT
PRPS1	5631	ENSG00000147224	chrX	-0.906082	6.60138	-19.9521	4.50437e-11	5.51156e-09	HeterovsWT		HS3ST2	9956	ENSG00000122254	chr16	-1.58344	5.13525	-25.9404	1.65176e-12	1.92317e-10	HomovsWT
TCEAL8	90843	ENSG00000180964	chrX	7.7152	-2.17726	19.9665	4.46396e-11	5.51156e-09	HeterovsWT		E2F2	1870	ENSG00000007968	chr1	1.41774	6.72497	25.9183	1.66969e-12	1.92317e-10	HomovsWT
MCF2L	23263	ENSG00000126217	chr13	2.18405	3.50271	19.8484	4.8078e-11	5.8096e-09	HeterovsWT		NEAT1	283131	ENSG00000245532	chr11	-1.04281	8.58612	-25.9625	1.63404e-12	1.92317e-10	HomovsWT
SASH3	54440	ENSG00000122122	chrX	-1.06071	6.76136	-19.84	4.83349e-11	5.8096e-09	HeterovsWT		MICAL1	64780	ENSG00000135596	chr6	-1.71317	4.87626	-25.4085	2.14712e-12	2.26145e-10	HomovsWT
LRRC7	57554	ENSG00000033122	chr1	-1.79804	3.59922	-19.7779	5.02667e-11	5.94269e-09	HeterovsWT		SH2D3C	10044	ENSG00000095370	chr9	2.59718	4.26213	25.2962	2.27096e-12	2.37263e-10	HomovsWT
FHIT	2272	ENSG00000189283	chr3	1.57316	5.49417	19.7763	5.03173e-11	5.94269e-09	HeterovsWT		SNRPB2	6629	ENSG00000125870	chr20	-1.68296	5.34595	-25.4248	2.12982e-12	2.26145e-10	HomovsWT
CYSLTR1	10800	ENSG00000173198	chrX	-1.49748	4.45889	-19.6722	5.37524e-11	6.29366e-09	HeterovsWT		CD70	970	ENSG00000125726	chr19	-3.25989	3.12039	-25.4078	2.14789e-12	2.26145e-10	HomovsWT
UBE2A	7319	ENSG00000077721	chrX	-1.14981	6.22443	-19.6194	5.55884e-11	6.45301e-09	HeterovsWT		LINC01226	284551	NA	chr1	-3.02365	4.74048	-25.2102	2.37094e-12	2.44766e-10	HomovsWT
ARFGEF3	57221	ENSG00000112379	chr6	-1.99072	4.43272	-19.5775	5.70943e-11	6.46212e-09	HeterovsWT		TBC1D2B	23102	ENSG00000167202	chr15	-1.1632	7.76902	-25.6784	1.87835e-12	2.06518e-10	HomovsWT
CKAP4	10970	ENSG00000136026	chr12	-0.97543	6.0086	-19.5784	5.70608e-11	6.46212e-09	HeterovsWT		CUX1	1523	ENSG00000257923	chr7	1.1653	8.12514	25.6707	1.88546e-12	2.06518e-10	HomovsWT
DIAPH2	1730	ENSG00000147202	chrX	-1.23184	6.88459	-19.582	5.69311e-11	6.46212e-09	HeterovsWT		MTERF1	7978	ENSG00000127989	chr7	-2.3327	4.40652	-24.982	2.65995e-12	2.66753e-10	HomovsWT
COL28A1	340267	ENSG00000215018	chr7	-1.68016	3.43381	-19.5355	5.86451e-11	6.5828e-09	HeterovsWT		TRGC1	6966	ENSG00000211689	chr7	-4.5505	2.92739	-25.9169	1.67085e-12	1.92317e-10	HomovsWT
BTBD8	284697	ENSG00000189195	chr1	6.63003	-3.63572	19.5175	5.93276e-11	6.60481e-09	HeterovsWT		BACE2	25825	ENSG00000182240	chr21	3.69724	2.88628	25.4407	2.11299e-12	2.26145e-10	HomovsWT
MAML2	84441	ENSG00000184384	chr11	-2.01256	4.70613	-19.318	6.74503e-11	7.44805e-09	HeterovsWT		MLC1	23209	ENSG00000100427	chr22	-1.81931	6.28702	-24.9274	2.73454e-12	2.71099e-10	HomovsWT
ABCA17P	650655	ENSG00000238098	chr16	1.56358	3.42968	19.282	6.9039e-11	7.5015e-09	HeterovsWT		GALNT3	2591	ENSG00000115339	chr2	-3.24532	3.67166	-24.8738	2.81002e-12	2.76563e-10	HomovsWT
AMER1	139285	ENSG00000184675	chrX	-1.28052	5.12305	-19.2845	6.8927e-11	7.5015e-09	HeterovsWT		NCAPG2	54892	ENSG00000146918	chr7	1.17884	8.55188	25.2036	2.37882e-12	2.44766e-10	HomovsWT
LINC00906	148145	ENSG00000267339	chr19	-1.12636	6.72378	-19.2243	7.16753e-11	7.72614e-09	HeterovsWT		AC090825.1	NA	NA	chr15	-1.94457	5.25401	-24.6892	3.08753e-12	2.94704e-10	HomovsWT
KIF26B	55083	ENSG00000162849	chr1	-1.75329	4.11496	-19.1714	7.41819e-11	7.76636e-09	HeterovsWT		IDH3A	3419	ENSG00000166411	chr15	-1.33915	5.78908	-24.777	2.95205e-12	2.86391e-10	HomovsWT
MYO7B	4648	ENSG00000169994	chr2	3.89229	0.411401	19.1332	7.60511e-11	7.76636e-09	HeterovsWT		INSIG1	3638	ENSG00000186480	chr7	1.04778	9.0957	24.8517	2.84174e-12	2.77673e-10	HomovsWT
BCL2A1	597	ENSG00000140379	chr15	-1.8596	4.14394	-19.1413	7.56531e-11	7.76636e-09	HeterovsWT		FAH	2184	ENSG00000103876	chr15	-1.31665	7.57481	-24.6794	3.10302e-12	2.94704e-10	HomovsWT
SDHAF3	57001	ENSG00000196636	chr7	-1.48314	5.21107	-19.1493	7.52555e-11	7.76636e-09	HeterovsWT		LILRA2	11027	ENSG00000275290	chr19	1.26442	6.97455	24.6554	3.14145e-12	2.94704e-10	HomovsWT
NAV2	89797	ENSG00000166833	chr11	-1.16843	5.93839	-19.2017	7.27353e-11	7.76636e-09	HeterovsWT		LINC00926	283663	ENSG00000247982	chr15	-1.66575	7.67391	-24.6524	3.14623e-12	2.94704e-10	HomovsWT
AMMECR1	9949	ENSG00000101935	chrX	-1.07225	6.20895	-19.1556	7.49465e-11	7.76636e-09	HeterovsWT		SDK1	221935	ENSG00000146555	chr7	-1.2566	7.30081	-24.6062	3.22172e-12	2.99708e-10	HomovsWT
ZKSCAN1	7586	ENSG00000106261	chr7	-0.890887	7.59645	-19.1904	7.32688e-11	7.76636e-09	HeterovsWT		FBN1	2200	ENSG00000166147	chr15	-1.93668	4.6187	-24.1642	4.05094e-12	3.48227e-10	HomovsWT
SLC25A43	203427	ENSG00000077713	chrX	-1.13648	5.15182	-19.1186	7.67808e-11	7.78236e-09	HeterovsWT		WDR61	80349	ENSG00000140395	chr15	-1.25887	6.275	-24.3649	3.64907e-12	3.23932e-10	HomovsWT
AL360015.1	NA	NA	chr6	-7.51365	-3.33189	-19.1048	7.74724e-11	7.7943e-09	HeterovsWT		EZH2	2146	ENSG00000106462	chr7	1.11155	7.33428	24.5222	3.36404e-12	3.06647e-10	HomovsWT
MAST4	375449	ENSG00000069020	chr5	1.99214	3.6661	19.0486	8.03766e-11	8.02703e-09	HeterovsWT		RLIM	51132	ENSG00000131263	chrX	-1.04927	7.58343	-24.5249	3.35948e-12	3.06647e-10	HomovsWT
DOCK11	139818	ENSG00000147251	chrX	-1.1526	7.84711	-19.0356	8.10654e-11	8.03672e-09	HeterovsWT		IL17RA	23765	ENSG00000177663	chr22	1.29437	8.06363	24.5553	3.30728e-12	3.05575e-10	HomovsWT
CD226	10666	ENSG00000150637	chr18	2.70858	1.76395	18.9786	8.41539e-11	8.28245e-09	HeterovsWT		GAS6	2621	ENSG00000183087	chr13	-2.21881	4.66035	-23.9718	4.48124e-12	3.71123e-10	HomovsWT
AIFM1	9131	ENSG00000156709	chrX	-0.925488	6.22688	-18.9559	8.54217e-11	8.34675e-09	HeterovsWT		CCNG2	901	ENSG00000138764	chr4	1.35957	6.04151	24.2471	3.8795e-12	3.39944e-10	HomovsWT
MAGED1	9500	ENSG00000179222	chrX	10.2053	2.54426	18.935	8.66041e-11	8.40183e-09	HeterovsWT		CALN1	83698	ENSG00000183166	chr7	-3.75543	2.32706	-24.6946	3.07906e-12	2.94704e-10	HomovsWT
ACSL4	2182	ENSG00000068366	chrX	-0.980849	7.53456	-18.8597	9.10181e-11	8.76743e-09	HeterovsWT		APMAP	57136	ENSG00000101474	chr20	-1.1645	7.91846	-24.3866	3.6083e-12	3.22421e-10	HomovsWT
C12orf75	387882	ENSG00000235162	chr12	-1.06718	5.09403	-18.821	9.33792e-11	8.87654e-09	HeterovsWT		PDE8A	5151	ENSG00000073417	chr15	-1.26045	6.55224	-24.2123	3.95055e-12	3.42766e-10	HomovsWT
BRWD3	254065	ENSG00000165288	chrX	-1.14782	5.84802	-18.8197	9.34579e-11	8.87654e-09	HeterovsWT		ZNF714	148206	ENSG00000160352	chr19	-2.76254	2.98529	-23.8531	4.7712e-12	3.83447e-10	HomovsWT
TERT	7015	ENSG00000164362	chr5	1.90132	4.66615	18.7719	9.6469e-11	9.07981e-09	HeterovsWT		PSAT1	29968	ENSG00000135069	chr9	-1.28531	8.664	-24.3896	3.60272e-12	3.22421e-10	HomovsWT
MID1IP1	58526	ENSG00000165175	chrX	-1.18538	7.00713	-18.7646	9.6935e-11	9.07981e-09	HeterovsWT		MID1IP1	58526	ENSG00000165175	chrX	-1.56888	7.00713	-24.2066	3.96218e-12	3.42766e-10	HomovsWT
ABHD17C	58489	ENSG00000136379	chr15	-0.926855	6.76138	-18.7226	9.96839e-11	9.21025e-09	HeterovsWT		HSBP1L1	440498	ENSG00000226742	chr18	2.93592	3.64172	23.7019	5.16999e-12	4.10637e-10	HomovsWT
GM2A	2760	ENSG00000196743	chr5	-0.849902	6.90309	-18.7308	9.91408e-11	9.21025e-09	HeterovsWT		STOX2	56977	ENSG00000173320	chr4	-2.12596	3.72364	-23.6212	5.39737e-12	4.2374e-10	HomovsWT
PTPRF	5792	ENSG00000142949	chr1	1.36572	4.72136	18.7097	1.00545e-10	9.22708e-09	HeterovsWT		MORF4L2	9643	ENSG00000123562	chrX	-1.22354	7.4781	-24.1334	4.11673e-12	3.48537e-10	HomovsWT
AC016573.1	NA	NA	chr5	-2.80863	3.36867	-18.6392	1.05384e-10	9.56688e-09	HeterovsWT		SEPTIN10	151011	ENSG00000186522	chr2	-4.57992	3.35464	-24.4532	3.48603e-12	3.15649e-10	HomovsWT
SYNE1	23345	ENSG00000131018	chr6	-1.7321	3.66277	-18.6354	1.05657e-10	9.56688e-09	HeterovsWT		TMED3	23423	ENSG00000166557	chr15	-1.02884	7.5959	-24.1266	4.13153e-12	3.48537e-10	HomovsWT
RALGPS2	55103	ENSG00000116191	chr1	1.48833	4.9167	18.6112	1.07376e-10	9.65812e-09	HeterovsWT		CD99L2	83692	ENSG00000102181	chrX	-1.20802	6.34482	-23.9423	4.55147e-12	3.74008e-10	HomovsWT
PSMD10	5716	ENSG00000101843	chrX	-1.1518	5.31239	-18.6014	1.08088e-10	9.65822e-09	HeterovsWT		OAT	4942	ENSG00000065154	chr10	-1.42473	6.15993	-23.8647	4.74195e-12	3.83364e-10	HomovsWT
PLAGL1	5325	ENSG00000118495	chr6	1.6374	4.98745	18.5609	1.11063e-10	9.80675e-09	HeterovsWT		RRM2	6241	ENSG00000171848	chr2	0.915398	9.3125	24.1436	4.09478e-12	3.48537e-10	HomovsWT
AL031123.1	NA	NA	chr6	-0.923732	5.51031	-18.5591	1.11194e-10	9.80675e-09	HeterovsWT		PIM1	5292	ENSG00000137193	chr6	1.20811	7.11547	23.9925	4.43269e-12	3.69355e-10	HomovsWT
E2F3	1871	ENSG00000112242	chr6	1.06407	6.63996	18.5192	1.14212e-10	1.00079e-08	HeterovsWT		ABCA13	154664	ENSG00000179869	chr7	-2.99187	3.59774	-23.377	6.15351e-12	4.64317e-10	HomovsWT
LAS1L	81887	ENSG00000001497	chrX	-0.851511	6.36771	-18.4794	1.17314e-10	1.02138e-08	HeterovsWT		EBF1	1879	ENSG00000164330	chr5	-2.11461	4.99091	-23.4239	5.99971e-12	4.60385e-10	HomovsWT
ASB2	51676	ENSG00000100628	chr14	-1.06643	5.32398	-18.4508	1.19602e-10	1.03467e-08	HeterovsWT		TYROBP	7305	ENSG00000011600	chr19	1.84941	4.10508	23.327	6.32174e-12	4.71769e-10	HomovsWT
IL18R1	8809	ENSG00000115604	chr2	-1.16749	5.0172	-18.4333	1.2102e-10	1.04032e-08	HeterovsWT		LAMP5-AS1	101929329	ENSG00000225988	chr20	-6.10645	3.15227	-25.5749	1.97687e-12	2.14799e-10	HomovsWT
IFIH1	64135	ENSG00000115267	chr2	-1.18111	4.80221	-18.3538	1.27713e-10	1.09094e-08	HeterovsWT		CPQ	10404	ENSG00000104324	chr8	-1.81315	5.41256	-23.3025	6.40612e-12	4.72869e-10	HomovsWT
SUSD1	64420	ENSG00000106868	chr9	1.7619	3.9128	18.3276	1.30007e-10	1.10359e-08	HeterovsWT		IMMP2L	83943	ENSG00000184903	chr7	-1.43921	6.95131	-23.4927	5.78192e-12	4.46194e-10	HomovsWT
FAP	2191	ENSG00000078098	chr2	-3.07839	-0.437419	-18.2388	1.381e-10	1.16502e-08	HeterovsWT		SSBP3	23648	ENSG00000157216	chr1	1.06593	7.9674	23.5254	5.68115e-12	4.40922e-10	HomovsWT
TRGC2	6967	ENSG00000227191	chr7	-1.85611	2.17315	-18.1732	1.44435e-10	1.16769e-08	HeterovsWT		AC008957.1	NA	NA	chr5	-2.20904	3.45796	-22.9125	7.92493e-12	5.43618e-10	HomovsWT
AC008632.1	NA	NA	chr5	-3.00918	2.34945	-18.1804	1.43728e-10	1.16769e-08	HeterovsWT		LNPK	80856	ENSG00000144320	chr2	-1.24254	7.03871	-23.3432	6.2666e-12	4.70237e-10	HomovsWT
TNKS1BP1	85456	ENSG00000149115	chr11	1.34747	5.5903	18.2042	1.41407e-10	1.16769e-08	HeterovsWT		VEGFA	7422	ENSG00000112715	chr6	-1.096	7.78214	-23.3921	6.10337e-12	4.63106e-10	HomovsWT
DNA2	1763	ENSG00000138346	chr10	1.27765	5.93231	18.1867	1.43105e-10	1.16769e-08	HeterovsWT		INTS6L	203522	ENSG00000165359	chrX	-1.30615	5.94759	-23.1518	6.9522e-12	5.02799e-10	HomovsWT
ENOX2	10495	ENSG00000165675	chrX	-1.11364	5.5366	-18.183	1.4347e-10	1.16769e-08	HeterovsWT		DMXL2	23312	ENSG00000104093	chr15	-1.05113	8.17794	-23.3992	6.0803e-12	4.63106e-10	HomovsWT
STARD7	56910	ENSG00000084090	chr2	0.733619	8.37147	18.212	1.40656e-10	1.16769e-08	HeterovsWT		LINC01473	101927217	NA	chr2	-1.76367	5.33296	-22.9735	7.66385e-12	5.31074e-10	HomovsWT
RGCC	28984	ENSG00000102760	chr13	4.56867	0.568057	18.2158	1.40291e-10	1.16769e-08	HeterovsWT		ARID5B	84159	ENSG00000150347	chr10	2.12472	4.32963	22.8335	8.27763e-12	5.62134e-10	HomovsWT
CDKAL1	54901	ENSG00000145996	chr6	-0.983217	6.96453	-18.148	1.46949e-10	1.18098e-08	HeterovsWT		ERN1	2081	ENSG00000178607	chr17	-1.46847	5.45841	-22.9324	7.83901e-12	5.40454e-10	HomovsWT
DNM1	1759	ENSG00000106976	chr9	1.83997	3.02842	18.1308	1.48691e-10	1.18379e-08	HeterovsWT		TSPAN4	7106	ENSG00000214063	chr11	2.43823	5.14445	22.7569	8.63581e-12	5.77791e-10	HomovsWT
AL034397.3	NA	NA	chrX	-1.16437	7.21489	-18.1209	1.49704e-10	1.18379e-08	HeterovsWT		NXF3	56000	ENSG00000147206	chrX	-1.54168	5.8588	-22.9869	7.60793e-12	5.29902e-10	HomovsWT
PLXND1	23129	ENSG00000004399	chr3	0.951823	8.32957	18.1189	1.49913e-10	1.18379e-08	HeterovsWT		NIBAN1	116496	ENSG00000135842	chr1	-1.05986	7.75362	-23.1971	6.78319e-12	4.95319e-10	HomovsWT
AFDN	4301	ENSG00000130396	chr6	-12.037	-1.41578	-18.1007	1.51797e-10	1.19174e-08	HeterovsWT		CTSH	1512	ENSG00000103811	chr15	-1.23689	6.47907	-23.0684	7.27594e-12	5.1203e-10	HomovsWT
POLE	5426	ENSG00000177084	chr12	0.860555	8.15289	18.0512	1.57059e-10	1.21896e-08	HeterovsWT		GRIP1	23426	ENSG00000155974	chr12	-3.77331	2.8079	-23.0812	7.22534e-12	5.11117e-10	HomovsWT
OTOAP1	653786	ENSG00000257838	chr16	-5.17654	1.25167	-18.0555	1.56589e-10	1.21896e-08	HeterovsWT		MARCKSL1	65108	ENSG00000175130	chr1	5.08179	3.92167	23.1499	6.95967e-12	5.02799e-10	HomovsWT
ZNF117	51351	ENSG00000152926	chr7	3.28914	4.09168	18.0158	1.60938e-10	1.24196e-08	HeterovsWT		OLA1	29789	ENSG00000138430	chr2	-1.48306	7.97623	-23.0985	7.15722e-12	5.11117e-10	HomovsWT
KCNA3	3738	ENSG00000177272	chr1	1.6978	3.93005	17.9868	1.64187e-10	1.2528e-08	HeterovsWT		LRRC7	57554	ENSG00000033122	chr1	-2.21302	3.59922	-22.4727	1.01166e-11	6.51203e-10	HomovsWT
MAP4K4	9448	ENSG00000071054	chr2	0.842716	8.01584	17.9938	1.63396e-10	1.2528e-08	HeterovsWT		AEBP1	165	ENSG00000106624	chr7	3.86903	1.81263	23.0858	7.20717e-12	5.11117e-10	HomovsWT
MICAL2	9645	ENSG00000133816	chr11	-1.17807	4.96526	-17.9557	1.67758e-10	1.26583e-08	HeterovsWT		TRGC2	6967	ENSG00000227191	chr7	-4.66383	2.17315	-23.7338	5.08289e-12	4.06093e-10	HomovsWT
CUL4B	8450	ENSG00000158290	chrX	-0.979112	6.22757	-17.9579	1.67508e-10	1.26583e-08	HeterovsWT		PLPPR2	64748	ENSG00000105520	chr19	-1.99896	4.71597	-22.474	1.01092e-11	6.51203e-10	HomovsWT
BRI3	25798	ENSG00000164713	chr7	-1.1562	7.14671	-17.9208	1.71869e-10	1.28968e-08	HeterovsWT		ZFP92	139735	ENSG00000189420	chrX	-1.76239	5.38116	-22.5715	9.5729e-12	6.25092e-10	HomovsWT
ZNF75D	7626	ENSG00000186376	chrX	-1.1694	4.89475	-17.859	1.79404e-10	1.33883e-08	HeterovsWT		PPP1R18	170954	ENSG00000236428	chr6	1.2203	7.15495	22.8689	8.11752e-12	5.54031e-10	HomovsWT
SPAG6	9576	ENSG00000077327	chr10	1.85479	4.34907	17.8234	1.83902e-10	1.36489e-08	HeterovsWT		SCPEP1	59342	ENSG00000121064	chr17	1.43508	6.4639	22.6681	9.07172e-12	5.98117e-10	HomovsWT
INTS6L	203522	ENSG00000165359	chrX	-0.969198	5.94759	-17.7597	1.92274e-10	1.41928e-08	HeterovsWT		CREG1	8804	ENSG00000143162	chr1	-1.14195	7.27752	-22.7696	8.57521e-12	5.76577e-10	HomovsWT
SH2D3C	10044	ENSG00000095370	chr9	1.88789	4.26213	17.7487	1.93748e-10	1.42242e-08	HeterovsWT		ATP2B2	491	ENSG00000157087	chr3	-3.3661	2.76685	-22.6752	9.03599e-12	5.98117e-10	HomovsWT
SIGLEC6	946	ENSG00000105492	chr19	-0.832009	7.14657	-17.7347	1.95658e-10	1.42873e-08	HeterovsWT		ACVR1	90	ENSG00000115170	chr2	-1.8432	3.87039	-22.2012	1.17893e-11	7.3115e-10	HomovsWT
ST6GALNAC3	256435	ENSG00000184005	chr1	-0.991431	7.88565	-17.7239	1.97146e-10	1.43189e-08	HeterovsWT		SNX20	124460	ENSG00000167208	chr16	-2.03082	4.44268	-22.2484	1.1478e-11	7.18409e-10	HomovsWT
APBA1	320	ENSG00000276497	chr9	-2.03488	2.40768	-17.6132	2.13097e-10	1.53951e-08	HeterovsWT		UBASH3B	84959	ENSG00000154127	chr11	1.57124	4.70177	22.37	1.07172e-11	6.83383e-10	HomovsWT
FTX	100302692	ENSG00000230590	chrX	-1.08001	6.90658	-17.5917	2.16352e-10	1.55476e-08	HeterovsWT		ZNF280C	55609	ENSG00000056277	chrX	-2.15545	5.40311	-22.4027	1.05219e-11	6.74097e-10	HomovsWT
H2AFJ	NA	NA	chr12	6.80329	-3.57748	17.4985	2.31086e-10	1.6519e-08	HeterovsWT		SUN1	23353	ENSG00000164828	chr7	0.976082	6.81395	22.6801	9.0114e-12	5.98117e-10	HomovsWT
NONO	4841	ENSG00000147140	chrX	-0.672884	8.80463	-17.4873	2.32924e-10	1.65632e-08	HeterovsWT		LYST	1130	ENSG00000143669	chr1	-1.23364	9.65485	-22.7897	8.48039e-12	5.73038e-10	HomovsWT
TSPYL4	23270	ENSG00000187189	chr6	2.34837	3.36937	17.4565	2.3807e-10	1.67537e-08	HeterovsWT		MTM1	4534	ENSG00000171100	chrX	-1.5615	5.22087	-22.3221	1.10105e-11	6.98807e-10	HomovsWT
NRIP3	56675	ENSG00000175352	chr11	6.51376	0.654916	17.4604	2.37416e-10	1.67537e-08	HeterovsWT		TSPYL4	23270	ENSG00000187189	chr6	2.90633	3.36937	22.1445	1.21746e-11	7.40343e-10	HomovsWT
NECTIN1	5818	ENSG00000110400	chr11	0.924144	6.41023	17.4477	2.3957e-10	1.67724e-08	HeterovsWT		IFT57	55081	ENSG00000114446	chr3	-1.68408	4.3092	-22.1356	1.22362e-11	7.40343e-10	HomovsWT
GLRA2	2742	ENSG00000101958	chrX	-1.76074	4.05295	-17.431	2.42423e-10	1.67989e-08	HeterovsWT		RALGPS2	55103	ENSG00000116191	chr1	1.74546	4.9167	22.1649	1.20343e-11	7.40343e-10	HomovsWT
YIPF6	286451	ENSG00000181704	chrX	-0.926211	5.48689	-17.4374	2.4133e-10	1.67989e-08	HeterovsWT		CXorf21	NA	NA	chrX	-2.33065	3.79119	-22.0066	1.31697e-11	7.60375e-10	HomovsWT
TNNT1	7138	ENSG00000105048	chr19	2.47363	4.65241	17.423	2.43818e-10	1.68098e-08	HeterovsWT		GJB2	2706	ENSG00000165474	chr13	-2.3467	3.99003	-21.9968	1.32442e-11	7.60375e-10	HomovsWT
ADAM22	53616	ENSG00000008277	chr7	-0.885442	6.2836	-17.3552	2.55895e-10	1.75534e-08	HeterovsWT		IRAK1	3654	ENSG00000184216	chrX	-1.24521	8.3354	-22.5976	9.43461e-12	6.19038e-10	HomovsWT
PHLPP1	23239	ENSG00000081913	chr18	0.90013	6.36055	17.2583	2.74277e-10	1.87197e-08	HeterovsWT		DBN1	1627	ENSG00000113758	chr5	1.51125	4.66871	22.1316	1.22646e-11	7.40343e-10	HomovsWT
PIGX	54965	ENSG00000163964	chr3	-1.2066	4.89034	-17.2443	2.77048e-10	1.88143e-08	HeterovsWT		KLF6	1316	ENSG00000067082	chr10	1.14127	6.42815	22.3052	1.11158e-11	7.0221e-10	HomovsWT
OCLN	100506658	ENSG00000197822	chr5	5.07572	0.731462	17.2206	2.81817e-10	1.9043e-08	HeterovsWT		TRIB2	28951	ENSG00000071575	chr2	1.26223	6.30438	22.2642	1.13759e-11	7.15315e-10	HomovsWT
BACE2	25825	ENSG00000182240	chr21	2.6007	2.88628	17.2107	2.83832e-10	1.90842e-08	HeterovsWT		MBTPS2	51360	ENSG00000012174	chrX	-1.39815	5.28969	-22.0663	1.27291e-11	7.5168e-10	HomovsWT
MCM7	4176	ENSG00000166508	chr7	-0.798175	9.74767	-17.1482	2.96908e-10	1.98651e-08	HeterovsWT		METTL8	79828	ENSG00000123600	chr2	-1.35206	6.08255	-22.1502	1.21354e-11	7.40343e-10	HomovsWT
NXF3	56000	ENSG00000147206	chrX	-1.09912	5.8588	-17.1407	2.98528e-10	1.98755e-08	HeterovsWT		ENOX2	10495	ENSG00000165675	chrX	-1.39559	5.5366	-22.0853	1.25914e-11	7.50073e-10	HomovsWT
MTM1	4534	ENSG00000171100	chrX	-1.13436	5.22087	-17.0813	3.1164e-10	2.06473e-08	HeterovsWT		RNF166	115992	ENSG00000158717	chr16	1.29061	5.61182	22.0477	1.28643e-11	7.56375e-10	HomovsWT
STAG2	10735	ENSG00000101972	chrX	-0.871989	8.35755	-17.0518	3.18378e-10	2.09913e-08	HeterovsWT		METAP1D	254042	ENSG00000172878	chr2	-1.84021	6.21024	-22.0043	1.31876e-11	7.60375e-10	HomovsWT
FLNA	2316	ENSG00000196924	chrX	-0.816076	11.4857	-17.027	3.24163e-10	2.12695e-08	HeterovsWT		CUL4B	8450	ENSG00000158290	chrX	-1.23328	6.22757	-22.1133	1.23928e-11	7.44775e-10	HomovsWT
DPY19L2P2	349152	ENSG00000282026	chr7	3.24127	1.27424	16.9918	3.32574e-10	2.17165e-08	HeterovsWT		MS4A3	932	ENSG00000284903	chr11	-2.05371	6.18142	-21.9441	1.36494e-11	7.75676e-10	HomovsWT
DIRAS1	148252	ENSG00000176490	chr19	-5.30836	-0.0774434	-16.9693	3.38069e-10	2.19696e-08	HeterovsWT		BRWD3	254065	ENSG00000165288	chrX	-1.37458	5.84802	-22.0067	1.31691e-11	7.60375e-10	HomovsWT
PPARG	5468	ENSG00000132170	chr3	-0.981152	5.91568	-16.9538	3.41917e-10	2.20091e-08	HeterovsWT		SLC25A43	203427	ENSG00000077713	chrX	-1.32793	5.15182	-21.8389	1.45e-11	8.10448e-10	HomovsWT
TLR2	7097	ENSG00000137462	chr4	7.76387	1.56941	16.9566	3.41214e-10	2.20091e-08	HeterovsWT		ATP8B2	57198	ENSG00000143515	chr1	-1.85497	4.26809	-21.6226	1.64327e-11	8.90419e-10	HomovsWT
AC098829.1	NA	NA	chr4	-2.07142	2.48119	-16.9072	3.5376e-10	2.25916e-08	HeterovsWT		FAM49A	NA	NA	chr2	-1.69973	4.23197	-21.5623	1.70201e-11	9.06535e-10	HomovsWT
TBC1D8	11138	ENSG00000204634	chr2	0.92256	5.74421	16.9052	3.54294e-10	2.25916e-08	HeterovsWT		DNA2	1763	ENSG00000138346	chr10	1.51629	5.93231	21.8406	1.44858e-11	8.10448e-10	HomovsWT
PLPPR2	64748	ENSG00000105520	chr19	-1.37327	4.71597	-16.8655	3.64732e-10	2.31485e-08	HeterovsWT		NANP	140838	ENSG00000170191	chr20	-1.51285	5.33537	-21.7215	1.5517e-11	8.56717e-10	HomovsWT
EPG5	57724	ENSG00000152223	chr18	0.740479	7.5031	16.8541	3.67803e-10	2.32349e-08	HeterovsWT		ARIH1	25820	ENSG00000166233	chr15	-0.973812	7.75002	-22.0686	1.27122e-11	7.5168e-10	HomovsWT
PRNP	5621	ENSG00000171867	chr20	-0.826365	6.87974	-16.8472	3.69659e-10	2.3244e-08	HeterovsWT		AL589693.1	NA	NA	chr6	-8.09081	3.40198	-23.9076	4.63561e-12	3.77011e-10	HomovsWT
COPS6	10980	ENSG00000168090	chr7	-0.819337	7.05462	-16.8108	3.79702e-10	2.37655e-08	HeterovsWT		GLO1	2739	ENSG00000124767	chr6	-1.78319	9.73587	-22.1384	1.22167e-11	7.40343e-10	HomovsWT
ZSCAN25	221785	ENSG00000197037	chr7	-0.912158	5.33888	-16.7988	3.83055e-10	2.38654e-08	HeterovsWT		E2F3	1871	ENSG00000112242	chr6	1.24726	6.63996	21.8589	1.43343e-11	8.09656e-10	HomovsWT
TLE2	7089	ENSG00000065717	chr19	-2.01657	2.61266	-16.7883	3.86019e-10	2.39402e-08	HeterovsWT		TENT5C	54855	ENSG00000183508	chr1	1.00918	7.96355	22.0099	1.31453e-11	7.60375e-10	HomovsWT
TMEM164	84187	ENSG00000157600	chrX	-0.792996	6.83589	-16.7153	4.0741e-10	2.5152e-08	HeterovsWT		SULT1A1	6817	ENSG00000196502	chr16	-1.4443	5.53453	-21.5883	1.67639e-11	9.0139e-10	HomovsWT
ACSL1	2180	ENSG00000151726	chr4	-0.86279	7.10179	-16.706	4.10197e-10	2.52095e-08	HeterovsWT		CLU	1191	ENSG00000120885	chr8	-1.48793	5.56873	-21.5418	1.72243e-11	9.13828e-10	HomovsWT
LINC00159	100551499	NA	chr21	2.27304	1.74473	16.6966	4.13076e-10	2.52721e-08	HeterovsWT		APBA1	320	ENSG00000276497	chr9	-3.68705	2.40768	-21.6517	1.61578e-11	8.81345e-10	HomovsWT
IL12A-AS1	101928376	ENSG00000244040	chr3	-0.800029	7.74711	-16.6892	4.15346e-10	2.5297e-08	HeterovsWT		RHOBTB1	9886	ENSG00000072422	chr10	1.80109	4.09932	21.3133	1.96939e-11	1.01705e-09	HomovsWT
AC104051.1	NA	NA	chr8	4.0256	0.166069	16.5871	4.48054e-10	2.70466e-08	HeterovsWT		GCNT1	2650	ENSG00000187210	chr9	-1.32247	5.99894	-21.6795	1.58987e-11	8.70713e-10	HomovsWT
AKAP9	10142	ENSG00000127914	chr7	-1.05118	6.86203	-16.5877	4.47842e-10	2.70466e-08	HeterovsWT		PLCL1	5334	ENSG00000115896	chr2	-2.10385	3.23959	-21.2736	2.01604e-11	1.02771e-09	HomovsWT
NDFIP1	80762	ENSG00000131507	chr5	-0.726046	6.692	-16.5585	4.57715e-10	2.75075e-08	HeterovsWT		RAPGEF4	11069	ENSG00000091428	chr2	-3.71851	2.71224	-21.5804	1.68409e-11	9.0139e-10	HomovsWT
RPL39	6170	ENSG00000198918	chrX	-0.974171	8.74974	-16.5495	4.60791e-10	2.75703e-08	HeterovsWT		CR1	1378	ENSG00000203710	chr1	-3.94108	1.96362	-22.0991	1.24929e-11	7.47481e-10	HomovsWT
CNDP2	55748	ENSG00000133313	chr18	0.69794	7.57456	16.5191	4.71393e-10	2.8081e-08	HeterovsWT		DIAPH2	1730	ENSG00000147202	chrX	-1.38597	6.88459	-21.7851	1.49568e-11	8.32553e-10	HomovsWT
FAM199X	139231	ENSG00000123575	chrX	-0.884364	6.42292	-16.513	4.73526e-10	2.80849e-08	HeterovsWT		BIN1	274	ENSG00000136717	chr2	-2.09856	4.80898	-21.3537	1.92301e-11	9.96884e-10	HomovsWT
MFAP4	4239	ENSG00000166482	chr17	3.50273	1.26094	16.4741	4.87532e-10	2.87898e-08	HeterovsWT		SIPA1L2	57568	ENSG00000116991	chr1	-1.22952	5.6157	-21.5788	1.68571e-11	9.0139e-10	HomovsWT
C2orf72	257407	ENSG00000204128	chr2	-6.79574	-3.2219	-16.4457	4.97999e-10	2.92806e-08	HeterovsWT		DPY19L1	23333	ENSG00000173852	chr7	1.17938	7.07022	21.7718	1.5072e-11	8.35542e-10	HomovsWT
ARAP2	116984	ENSG00000047365	chr4	-1.56638	4.52168	-16.4147	5.09735e-10	2.97134e-08	HeterovsWT		FRG1-DT	728339	ENSG00000281787	chr4	-8.59108	1.98559	-25.1308	2.46749e-12	2.50377e-10	HomovsWT
ZNF462	58499	ENSG00000148143	chr9	6.60505	0.825914	16.4193	5.07972e-10	2.97134e-08	HeterovsWT		AF064858.1	NA	NA	chr21	-2.53421	3.28348	-21.1803	2.13038e-11	1.06378e-09	HomovsWT
STXBP5L	9515	ENSG00000145087	chr3	-1.03266	4.61132	-16.3907	5.19044e-10	3.01267e-08	HeterovsWT		KIF5C	3800	ENSG00000276734	chr2	-2.66192	3.51102	-21.1327	2.19138e-11	1.08625e-09	HomovsWT
CBX5	23468	ENSG00000094916	chr12	1.00907	8.98857	16.3527	5.34111e-10	3.08694e-08	HeterovsWT		AC008014.1	NA	NA	chr12	-1.63438	4.71683	-21.2313	2.06703e-11	1.04755e-09	HomovsWT
VPS8	23355	ENSG00000156931	chr3	-0.839922	6.9017	-16.3293	5.43647e-10	3.12873e-08	HeterovsWT		FTX	100302692	ENSG00000230590	chrX	-1.35318	6.90658	-21.6203	1.64552e-11	8.90419e-10	HomovsWT
SMOX	54498	ENSG00000088826	chr20	-1.22586	4.0847	-16.304	5.54131e-10	3.16119e-08	HeterovsWT		SPRY2	10253	ENSG00000136158	chr13	1.14397	6.07552	21.505	1.75984e-11	9.22864e-10	HomovsWT
DNM3	26052	ENSG00000197959	chr1	-1.23544	4.19639	-16.2934	5.58596e-10	3.16119e-08	HeterovsWT		NKD1	85407	ENSG00000140807	chr16	-2.14242	3.36928	-21.0438	2.31052e-11	1.1329e-09	HomovsWT
TMOD2	29767	ENSG00000128872	chr15	-1.32234	5.5123	-16.2938	5.58429e-10	3.16119e-08	HeterovsWT		AC019117.3	NA	NA	chr7	4.1535	2.57492	21.3848	1.88825e-11	9.82612e-10	HomovsWT
DNASE2	1777	ENSG00000105612	chr19	-1.08502	5.79518	-16.3046	5.53863e-10	3.16119e-08	HeterovsWT		MIR9-3HG	254559	ENSG00000255571	chr15	1.45063	4.67479	21.2069	2.09706e-11	1.05882e-09	HomovsWT
QPRT	23475	ENSG00000103485	chr16	1.58173	5.73291	16.2384	5.82394e-10	3.28219e-08	HeterovsWT		TANC1	85461	ENSG00000115183	chr2	-3.69725	2.3784	-21.855	1.43666e-11	8.09656e-10	HomovsWT
ETS1	2113	ENSG00000134954	chr11	-0.78491	7.11805	-16.221	5.90117e-10	3.31197e-08	HeterovsWT		CD55	1604	ENSG00000196352	chr1	-1.32579	5.59745	-21.3035	1.98081e-11	1.01907e-09	HomovsWT
AC008875.3	NA	NA	chr5	1.94807	4.17701	16.1636	6.16475e-10	3.44566e-08	HeterovsWT		VPS8	23355	ENSG00000156931	chr3	-1.12873	6.9017	-21.5269	1.73753e-11	9.18254e-10	HomovsWT
CPXM1	56265	ENSG00000088882	chr20	1.87815	3.0533	16.1554	6.20378e-10	3.45327e-08	HeterovsWT		DDX60	55601	ENSG00000137628	chr4	-1.72949	3.58072	-20.9687	2.41649e-11	1.15317e-09	HomovsWT
AC104088.1	NA	NA	chr2	-1.01807	3.35729	-16.1373	6.28977e-10	3.48685e-08	HeterovsWT		CORO2B	10391	ENSG00000103647	chr15	-4.99939	2.1251	-22.5002	9.96232e-12	6.47408e-10	HomovsWT
MLC1	23209	ENSG00000100427	chr22	0.953167	6.28702	16.1315	6.3178e-10	3.48814e-08	HeterovsWT		TNNT1	7138	ENSG00000105048	chr19	2.91218	4.65241	20.883	2.54388e-11	1.18912e-09	HomovsWT
AC004980.1	NA	NA	chr7	-1.0657	6.22982	-16.1025	6.45963e-10	3.55201e-08	HeterovsWT		JAG1	182	ENSG00000101384	chr20	-4.99041	3.60771	-21.0537	2.29687e-11	1.1303e-09	HomovsWT
ASAH1	427	ENSG00000104763	chr8	-0.752242	8.36459	-16.0874	6.53468e-10	3.57879e-08	HeterovsWT		FAM20C	56975	ENSG00000281429	chr7	1.16257	5.7366	21.1921	2.11554e-11	1.06284e-09	HomovsWT
ZFP92	139735	ENSG00000189420	chrX	-1.16841	5.38116	-16.0472	6.73916e-10	3.67595e-08	HeterovsWT		FYN	2534	ENSG00000010810	chr6	-1.60546	4.7957	-20.9665	2.41976e-11	1.15317e-09	HomovsWT
CAMKV	79012	ENSG00000164076	chr3	-1.72052	0.0469575	-16.0074	6.94859e-10	3.77503e-08	HeterovsWT		NCF1	653361	ENSG00000158517	chr7	2.41911	1.8856	20.8241	2.63571e-11	1.22129e-09	HomovsWT
ADAMTS9	56999	ENSG00000163638	chr3	-1.65645	0.613337	-15.9962	7.00842e-10	3.79236e-08	HeterovsWT		HNMT	3176	ENSG00000150540	chr2	-5.10567	2.71559	-21.6801	1.58933e-11	8.70713e-10	HomovsWT
FOXP2	93986	ENSG00000128573	chr7	7.35054	-0.495502	15.9745	7.12679e-10	3.84112e-08	HeterovsWT		FCN1	2219	ENSG00000085265	chr9	-1.81934	4.96718	-20.9397	2.45888e-11	1.15559e-09	HomovsWT
CUX1	1523	ENSG00000257923	chr7	0.730853	8.12514	15.956	7.22884e-10	3.88072e-08	HeterovsWT		POLA1	5422	ENSG00000101868	chrX	-1.02792	7.85486	-21.2884	1.99844e-11	1.02426e-09	HomovsWT
CR1	1378	ENSG00000203710	chr1	-1.71873	1.96362	-15.9465	7.28197e-10	3.89385e-08	HeterovsWT		BARX1-DT	101928040	ENSG00000235601	chr9	-1.44968	5.58992	-20.9689	2.41616e-11	1.15317e-09	HomovsWT
CCNG2	901	ENSG00000138764	chr4	0.913517	6.04151	15.9146	7.46385e-10	3.97545e-08	HeterovsWT		PON2	5445	ENSG00000105854	chr7	-1.61244	4.8864	-20.853	2.59029e-11	1.20484e-09	HomovsWT
OSBPL5	114879	ENSG00000021762	chr11	0.917747	7.91046	15.8748	7.6977e-10	4.08399e-08	HeterovsWT		ETFA	2108	ENSG00000140374	chr15	-1.06762	6.92137	-21.1737	2.13868e-11	1.06401e-09	HomovsWT
GNB2	2783	ENSG00000172354	chr7	-0.873845	8.53121	-15.8697	7.72785e-10	4.08403e-08	HeterovsWT		PDYN-AS1	727993	ENSG00000233896	chr20	-3.54183	2.8751	-20.942	2.45544e-11	1.15559e-09	HomovsWT
SNRPB2	6629	ENSG00000125870	chr20	-0.963233	5.34595	-15.8265	7.99147e-10	4.20698e-08	HeterovsWT		PARPBP	55010	ENSG00000185480	chr12	-1.24447	5.68886	-20.9469	2.44831e-11	1.15559e-09	HomovsWT
CLEC12A	160364	ENSG00000172322	chr12	-0.835691	7.56803	-15.8183	8.04239e-10	4.21744e-08	HeterovsWT		FARP1	10160	ENSG00000152767	chr13	-3.75326	2.99283	-20.9406	2.45752e-11	1.15559e-09	HomovsWT
KCNG1	3755	ENSG00000026559	chr20	-3.81913	-1.40378	-15.7977	8.17252e-10	4.2692e-08	HeterovsWT		SMAD7	4092	ENSG00000101665	chr18	1.20182	5.45778	20.8805	2.54775e-11	1.18912e-09	HomovsWT
TRANK1	9881	ENSG00000168016	chr3	1.83795	2.90208	15.7769	8.30643e-10	4.32253e-08	HeterovsWT		NXT2	55916	ENSG00000101888	chrX	-1.79816	4.70933	-20.7112	2.82169e-11	1.28605e-09	HomovsWT
KIF16B	55614	ENSG00000089177	chr20	-1.16176	1.017	-15.7663	8.37522e-10	4.33059e-08	HeterovsWT		AOAH	313	ENSG00000136250	chr7	-1.54728	5.35827	-20.7568	2.74491e-11	1.26378e-09	HomovsWT
FMNL1	752	ENSG00000184922	chr17	1.08154	6.15355	15.7647	8.38569e-10	4.33059e-08	HeterovsWT		ITGB2	3689	ENSG00000160255	chr21	1.17881	9.8609	21.27	2.02031e-11	1.02771e-09	HomovsWT
ITGAX	3687	ENSG00000140678	chr16	-1.49601	4.11046	-15.7595	8.41982e-10	4.33174e-08	HeterovsWT		UBE2A	7319	ENSG00000077721	chrX	-1.23931	6.22443	-20.9712	2.41283e-11	1.15317e-09	HomovsWT
PON2	5445	ENSG00000105854	chr7	-1.14482	4.8864	-15.7361	8.57486e-10	4.39486e-08	HeterovsWT		HLCS	3141	ENSG00000159267	chr21	-0.945533	6.72492	-21.019	2.34497e-11	1.14025e-09	HomovsWT
ASXL1	171023	ENSG00000171456	chr20	0.641548	8.4025	15.71	8.75155e-10	4.46856e-08	HeterovsWT		CLPX	10845	ENSG00000166855	chr15	-1.00662	6.7915	-21.0149	2.35069e-11	1.14025e-09	HomovsWT
LINC00894	NA	NA	chrX	-1.02671	4.165	-15.658	9.11567e-10	4.59469e-08	HeterovsWT		PHF19	26147	ENSG00000119403	chr9	1.34066	7.18501	21.0334	2.32491e-11	1.13586e-09	HomovsWT
RUNX2	860	ENSG00000124813	chr6	-1.18812	5.84803	-15.6555	9.13389e-10	4.59469e-08	HeterovsWT		MPP6	NA	NA	chr7	1.3793	5.36584	20.7299	2.78997e-11	1.28018e-09	HomovsWT
RAB5B	5869	ENSG00000111540	chr12	1.0471	6.31138	15.6593	9.10614e-10	4.59469e-08	HeterovsWT		METTL9	51108	ENSG00000284548	chr16	1.00461	8.02084	21.0785	2.2632e-11	1.11778e-09	HomovsWT
BAZ1B	9031	ENSG00000009954	chr7	-0.706331	8.80268	-15.6565	9.12648e-10	4.59469e-08	HeterovsWT		KMT2C	58508	ENSG00000055609	chr7	1.06746	8.15189	20.9985	2.37377e-11	1.14735e-09	HomovsWT
PSD3	23362	ENSG00000156011	chr8	-1.66252	3.63001	-15.6154	9.42637e-10	4.72432e-08	HeterovsWT		SMIM3	85027	ENSG00000256235	chr5	1.43323	5.02336	20.6034	3.01248e-11	1.3591e-09	HomovsWT
COX7B	1349	ENSG00000131174	chrX	-1.24582	6.09809	-15.6069	9.48899e-10	4.73822e-08	HeterovsWT		SEMA4A	64218	ENSG00000196189	chr1	-1.49276	5.319	-20.5455	3.12062e-11	1.38965e-09	HomovsWT
PHF19	26147	ENSG00000119403	chr9	1.00316	7.18501	15.5794	9.69686e-10	4.82428e-08	HeterovsWT		TOX	9760	ENSG00000198846	chr8	2.00708	3.72889	20.3305	3.56029e-11	1.53999e-09	HomovsWT
PDCD6IPP2	646278	NA	chr15	-0.751313	6.46941	-15.5741	9.73758e-10	4.82685e-08	HeterovsWT		ABCD1	215	ENSG00000101986	chrX	-1.28921	5.2096	-20.572	3.07064e-11	1.37189e-09	HomovsWT
SBDS	51119	ENSG00000126524	chr7	-1.1614	5.52438	-15.5583	9.85971e-10	4.86962e-08	HeterovsWT		FERMT1	55612	ENSG00000101311	chr20	-1.35214	5.85921	-20.6275	2.9686e-11	1.34398e-09	HomovsWT
CXXC1	30827	ENSG00000154832	chr18	1.21477	6.57661	15.5493	9.93002e-10	4.88658e-08	HeterovsWT		IRAK2	3656	ENSG00000134070	chr3	-1.70398	4.48085	-20.3479	3.5224e-11	1.53337e-09	HomovsWT
ALG13	79868	ENSG00000101901	chrX	-1.09118	5.31149	-15.5099	1.02445e-09	5.00508e-08	HeterovsWT		TMEM87B	84910	ENSG00000153214	chr2	-1.02314	6.45207	-20.7017	2.83785e-11	1.28909e-09	HomovsWT
SCPEP1	59342	ENSG00000121064	chr17	1.00033	6.4639	15.5136	1.02148e-09	5.00508e-08	HeterovsWT		MAP7	9053	ENSG00000135525	chr6	-1.78833	3.2931	-20.2082	3.83985e-11	1.62978e-09	HomovsWT
LRCH4	4034	ENSG00000077454	chr7	-0.95248	5.43309	-15.49	1.04074e-09	5.06642e-08	HeterovsWT		WDR75	84128	ENSG00000115368	chr2	-1.15506	6.9382	-20.7118	2.82058e-11	1.28605e-09	HomovsWT
ATP6AP1	537	ENSG00000071553	chrX	-0.754137	7.07625	-15.4725	1.05527e-09	5.11881e-08	HeterovsWT		DPYD	1806	ENSG00000188641	chr1	-1.33963	5.44489	-20.4669	3.27419e-11	1.43916e-09	HomovsWT
AC106741.1	NA	NA	chr16	-7.75924	-0.57271	-15.4674	1.05956e-09	5.12132e-08	HeterovsWT		DEPTOR	64798	ENSG00000155792	chr8	-1.63332	3.71732	-20.1471	3.98817e-11	1.68261e-09	HomovsWT
HRK	8739	ENSG00000135116	chr12	6.67903	-1.60433	15.4587	1.06686e-09	5.13835e-08	HeterovsWT		KIZ	55857	ENSG00000088970	chr20	-1.92012	3.88011	-20.1026	4.10019e-11	1.7135e-09	HomovsWT
MYOF	26509	ENSG00000138119	chr10	-2.628	1.29665	-15.4179	1.1021e-09	5.23383e-08	HeterovsWT		IP6K2	51447	ENSG00000068745	chr3	1.128	6.05938	20.4685	3.27096e-11	1.43916e-09	HomovsWT
CXCL8	3576	ENSG00000169429	chr4	-2.83074	1.32764	-15.4261	1.09491e-09	5.23383e-08	HeterovsWT		AC027250.2	NA	NA	chr8	-2.86821	2.63152	-20.0907	4.13048e-11	1.72086e-09	HomovsWT
SLC22A5	6584	ENSG00000197375	chr5	-1.27091	4.24297	-15.4273	1.09389e-09	5.23383e-08	HeterovsWT		UBE2Q2P2	100134869	ENSG00000259429	chr15	-1.61224	4.44754	-20.1467	3.98911e-11	1.68261e-09	HomovsWT
RBM47	54502	ENSG00000163694	chr4	-1.0076	4.94699	-15.4181	1.10187e-09	5.23383e-08	HeterovsWT		VIT	5212	ENSG00000205221	chr2	-11.4952	1.29414	-32.0265	1.13496e-13	3.26343e-11	HomovsWT
ENO2	2026	ENSG00000111674	chr12	4.04531	0.196699	15.3858	1.1306e-09	5.35044e-08	HeterovsWT		PRSS12	8492	ENSG00000164099	chr4	-1.9326	4.0663	-20.0319	4.28494e-11	1.77296e-09	HomovsWT
TPSAB1	7177	ENSG00000172236	chr16	1.58497	5.15142	15.3685	1.14629e-09	5.40588e-08	HeterovsWT		CTPS2	56474	ENSG00000047230	chrX	5.12718	2.51395	21.4904	1.77497e-11	9.27218e-10	HomovsWT
MYO5A	4644	ENSG00000197535	chr15	-1.25172	5.73823	-15.364	1.15046e-09	5.40677e-08	HeterovsWT		JARID2	3720	ENSG00000008083	chr6	0.848875	8.31912	20.5982	3.022e-11	1.3591e-09	HomovsWT
MORF4L2	9643	ENSG00000123562	chrX	-0.761449	7.4781	-15.3502	1.16321e-09	5.44784e-08	HeterovsWT		KCNQ5	56479	ENSG00000185760	chr6	-1.35304	7.90256	-20.5362	3.13839e-11	1.39299e-09	HomovsWT
RAB33A	9363	ENSG00000134594	chrX	-1.10546	4.45401	-15.3386	1.17406e-09	5.46935e-08	HeterovsWT		NFAM1	150372	ENSG00000235568	chr22	1.24973	6.35812	20.2999	3.62803e-11	1.55936e-09	HomovsWT
HLCS	3141	ENSG00000159267	chr21	-0.677351	6.72492	-15.3367	1.17586e-09	5.46935e-08	HeterovsWT		HMGN2	3151	ENSG00000198830	chr1	0.847818	10.1941	20.5738	3.06719e-11	1.37189e-09	HomovsWT
UPB1	51733	ENSG00000100024	chr22	1.3543	4.69263	15.3205	1.19118e-09	5.52172e-08	HeterovsWT		DBNDD1	79007	ENSG00000003249	chr16	2.65859	2.90271	19.8047	4.94219e-11	1.92294e-09	HomovsWT
SEMA3C	10512	ENSG00000075223	chr7	-4.00997	0.821835	-15.3121	1.19922e-09	5.54007e-08	HeterovsWT		ATP8B3	148229	ENSG00000130270	chr19	-1.4001	5.4317	-20.0719	4.17937e-11	1.73591e-09	HomovsWT
FCN1	2219	ENSG00000085265	chr9	-1.22886	4.96718	-15.3074	1.20374e-09	5.54211e-08	HeterovsWT		ITPR3	3710	ENSG00000096433	chr6	1.09876	7.67521	20.4096	3.39129e-11	1.48582e-09	HomovsWT
KLHL30	377007	ENSG00000168427	chr2	2.87186	0.218669	15.2918	1.21892e-09	5.55955e-08	HeterovsWT		EPHX1	2052	ENSG00000143819	chr1	-1.86526	4.44949	-19.8307	4.86195e-11	1.90853e-09	HomovsWT
SLC9A6	10479	ENSG00000198689	chrX	-0.946894	5.58666	-15.2983	1.21257e-09	5.55955e-08	HeterovsWT		TERT	7015	ENSG00000164362	chr5	1.99623	4.66615	19.8246	4.88067e-11	1.91035e-09	HomovsWT
KITLG	4254	ENSG00000049130	chr12	6.76606	-0.721949	15.2908	1.21981e-09	5.55955e-08	HeterovsWT		ATP1B1	481	ENSG00000143153	chr1	1.7217	4.39394	19.8005	4.9553e-11	1.92294e-09	HomovsWT
TRMT2B	79979	ENSG00000188917	chrX	-1.02519	5.20503	-15.2771	1.23335e-09	5.60248e-08	HeterovsWT		ANKRD28	23243	ENSG00000206560	chr3	-1.02161	7.15677	-20.2743	3.68593e-11	1.57925e-09	HomovsWT
SNX9	51429	ENSG00000130340	chr6	1.89189	3.01564	15.2595	1.25087e-09	5.66313e-08	HeterovsWT		MBP	4155	ENSG00000197971	chr18	0.967093	8.04245	20.3628	3.4902e-11	1.52424e-09	HomovsWT
ZFAND1	79752	ENSG00000104231	chr8	-1.65435	0.564385	-15.246	1.26449e-09	5.70573e-08	HeterovsWT		DNMT3B	1789	ENSG00000088305	chr20	1.34829	6.17154	20.1137	4.07196e-11	1.70696e-09	HomovsWT
SBDSP1	155370	ENSG00000225648	chr7	-1.21606	4.61665	-15.2302	1.28069e-09	5.75973e-08	HeterovsWT		BCL2A1	597	ENSG00000140379	chr15	-1.95386	4.14394	-19.7884	4.99345e-11	1.93222e-09	HomovsWT
HSPG2	3339	ENSG00000142798	chr1	-0.93374	5.76062	-15.1937	1.3189e-09	5.912e-08	HeterovsWT		ZNF117	51351	ENSG00000152926	chr7	3.55665	4.09168	19.6276	5.52971e-11	2.08642e-09	HomovsWT
HIST1H2BI	NA	NA	chr6	-1.63828	2.47086	-15.1666	1.34805e-09	6.02279e-08	HeterovsWT		SHROOM2	357	ENSG00000146950	chrX	-3.60069	2.94979	-19.906	4.63665e-11	1.86317e-09	HomovsWT
TNFRSF14	8764	ENSG00000157873	chr1	-1.22465	4.86881	-15.1294	1.38929e-09	6.18665e-08	HeterovsWT		PYROXD2	84795	ENSG00000119943	chr10	-1.66175	4.13573	-19.7215	5.20951e-11	2.00441e-09	HomovsWT
CHI3L1	1116	ENSG00000133048	chr1	1.4107	2.21516	15.0994	1.42344e-09	6.28936e-08	HeterovsWT		ZXDB	158586	ENSG00000198455	chrX	-1.99591	4.02767	-19.6442	5.47164e-11	2.07586e-09	HomovsWT
KLHL35	283212	ENSG00000149243	chr11	1.24297	3.12885	15.102	1.4205e-09	6.28936e-08	HeterovsWT		ITGA4	3676	ENSG00000115232	chr2	-1.01809	9.39393	-20.3337	3.55337e-11	1.53999e-09	HomovsWT
DPYD	1806	ENSG00000188641	chr1	-0.946098	5.44489	-15.097	1.42624e-09	6.28936e-08	HeterovsWT		AL035446.2	NA	NA	chr6	-1.46958	6.01227	-19.9941	4.38746e-11	1.7895e-09	HomovsWT
LAMA5	3911	ENSG00000130702	chr20	3.88335	1.08017	15.0921	1.43186e-09	6.2937e-08	HeterovsWT		TRIM71	131405	ENSG00000206557	chr3	1.15522	5.51008	19.9306	4.56561e-11	1.84554e-09	HomovsWT
PLOD3	8985	ENSG00000106397	chr7	-1.06894	8.34528	-15.0457	1.48689e-09	6.51448e-08	HeterovsWT		AK4	205	ENSG00000162433	chr1	1.26229	5.25537	19.8561	4.78472e-11	1.88433e-09	HomovsWT
MITF	4286	ENSG00000187098	chr3	-1.07911	4.00149	-15.0309	1.50497e-09	6.57252e-08	HeterovsWT		GLUL	2752	ENSG00000135821	chr1	-0.78048	9.6206	-20.2611	3.71618e-11	1.58299e-09	HomovsWT
BTK	695	ENSG00000010671	chrX	-0.786008	7.37077	-15.0229	1.51482e-09	6.59433e-08	HeterovsWT		ADAM22	53616	ENSG00000008277	chr7	-1.0329	6.2836	-19.9959	4.38263e-11	1.7895e-09	HomovsWT
GABPB1-AS1	100129387	NA	chr15	-0.737586	6.58491	-15.0012	1.54187e-09	6.66933e-08	HeterovsWT		NTPCR	84284	ENSG00000135778	chr1	-1.06937	5.82385	-19.8746	4.72924e-11	1.87623e-09	HomovsWT
PBX4	80714	ENSG00000105717	chr19	-4.5191	-1.40801	-15.0047	1.53743e-09	6.66933e-08	HeterovsWT		KIF16B	55614	ENSG00000089177	chr20	-10.8657	1.017	-29.7265	2.9309e-13	5.68679e-11	HomovsWT
IFT57	55081	ENSG00000114446	chr3	-1.03745	4.3092	-14.9889	1.55739e-09	6.71507e-08	HeterovsWT		LINC01550	388011	ENSG00000246223	chr14	-10.7618	0.383513	-29.6471	3.03224e-13	5.80054e-11	HomovsWT
SEL1L3	23231	ENSG00000091490	chr4	0.941702	5.51453	14.9612	1.5931e-09	6.84729e-08	HeterovsWT		CPVL	54504	ENSG00000106066	chr7	0.950236	6.80703	20.0283	4.29469e-11	1.77296e-09	HomovsWT
CTSV	1515	ENSG00000136943	chr9	5.5448	0.296279	14.9269	1.63845e-09	7.02002e-08	HeterovsWT		ADGRE2	30817	ENSG00000127507	chr19	1.21567	5.90808	19.8858	4.6959e-11	1.87372e-09	HomovsWT
MBTPS2	51360	ENSG00000012174	chrX	-0.889559	5.28969	-14.8778	1.70582e-09	7.28569e-08	HeterovsWT		PRTN3	5657	ENSG00000196415	chr19	-2.78901	5.09643	-19.4597	6.1564e-11	2.25744e-09	HomovsWT
ARRDC2	27106	ENSG00000105643	chr19	-1.10633	5.55435	-14.8556	1.73716e-09	7.37315e-08	HeterovsWT		AC098829.1	NA	NA	chr4	-2.88525	2.48119	-19.4509	6.19135e-11	2.26051e-09	HomovsWT
ZBTB33	10009	ENSG00000177485	chrX	-1.05874	6.13013	-14.8585	1.73311e-09	7.37315e-08	HeterovsWT		ZEB2	9839	ENSG00000169554	chr2	-1.48229	8.79572	-20.1211	4.05308e-11	1.7043e-09	HomovsWT
AC116351.1	NA	NA	chr5	1.25177	4.10701	14.8365	1.76473e-09	7.44367e-08	HeterovsWT		AC126323.1	NA	NA	chr15	-1.56086	5.16645	-19.6996	5.28229e-11	2.02667e-09	HomovsWT
PRKN	5071	ENSG00000185345	chr6	6.60463	-0.353126	14.8366	1.76459e-09	7.44367e-08	HeterovsWT		FAM111A	63901	ENSG00000166801	chr11	1.27429	7.42512	20.008	4.34954e-11	1.7895e-09	HomovsWT
LMTK2	22853	ENSG00000164715	chr7	-0.760329	6.57669	-14.8321	1.77115e-09	7.44762e-08	HeterovsWT		KIF26B	55083	ENSG00000162849	chr1	-1.80009	4.11496	-19.5148	5.94296e-11	2.22362e-09	HomovsWT
AC027601.1	NA	NA	chr17	4.47895	1.42227	14.8165	1.79413e-09	7.50635e-08	HeterovsWT		MAPKBP1	23005	ENSG00000137802	chr15	-1.7125	4.58892	-19.4928	6.0273e-11	2.23669e-09	HomovsWT
IGFL2-AS1	645553	ENSG00000268621	chr19	4.69024	-2.24887	14.8151	1.79617e-09	7.50635e-08	HeterovsWT		DNM3	26052	ENSG00000197959	chr1	-1.55267	4.19639	-19.4963	6.01353e-11	2.23669e-09	HomovsWT
DENND1C	79958	ENSG00000205744	chr19	-0.942162	4.86766	-14.8085	1.80603e-09	7.52437e-08	HeterovsWT		MGST3	4259	ENSG00000143198	chr1	-1.01908	6.76925	-19.883	4.70431e-11	1.87372e-09	HomovsWT
DDX60	55601	ENSG00000137628	chr4	-1.0944	3.58072	-14.7958	1.825e-09	7.58015e-08	HeterovsWT		RCAN1	1827	ENSG00000159200	chr21	-0.926182	6.50711	-19.8555	4.78644e-11	1.88433e-09	HomovsWT
NBDY	550643	ENSG00000204272	chrX	-2.75961	0.00858057	-14.7864	1.83916e-09	7.61568e-08	HeterovsWT		ADAM10	102	ENSG00000137845	chr15	-1.10998	8.00601	-20.0035	4.36177e-11	1.7895e-09	HomovsWT
FSCN1	6624	ENSG00000075618	chr7	2.78772	2.58355	14.7644	1.87297e-09	7.72011e-08	HeterovsWT		TMEM266	123591	ENSG00000169758	chr15	-1.47534	4.52412	-19.4787	6.08198e-11	2.24471e-09	HomovsWT
ATP1B1	481	ENSG00000143153	chr1	1.31832	4.39394	14.7626	1.87574e-09	7.72011e-08	HeterovsWT		AC027117.2	NA	NA	chr8	-5.10114	1.54426	-20.8191	2.64364e-11	1.22129e-09	HomovsWT
PPP2R2B	5521	ENSG00000156475	chr5	-9.25105	-1.05885	-14.739	1.91286e-09	7.84907e-08	HeterovsWT		PSMD10	5716	ENSG00000101843	chrX	-1.22414	5.31239	-19.6275	5.53019e-11	2.08642e-09	HomovsWT
ANKIB1	54467	ENSG00000001629	chr7	-0.825394	7.01531	-14.6748	2.01765e-09	8.25414e-08	HeterovsWT		EIF2AK4	440275	ENSG00000128829	chr15	-1.01095	6.72902	-19.8019	4.95093e-11	1.92294e-09	HomovsWT
VEGFA	7422	ENSG00000112715	chr6	-0.675276	7.78214	-14.6468	2.06526e-09	8.42353e-08	HeterovsWT		RAB3GAP2	25782	ENSG00000118873	chr1	-0.862556	7.82692	-19.9148	4.61125e-11	1.85846e-09	HomovsWT
NKD1	85407	ENSG00000140807	chr16	-1.26704	3.36928	-14.6364	2.08315e-09	8.47104e-08	HeterovsWT		PROS1	5627	ENSG00000184500	chr3	-2.3829	3.06145	-19.2259	7.15987e-11	2.5128e-09	HomovsWT
ZFPM2-AS1	102723356	NA	chr8	-1.85645	1.28324	-14.619	2.11363e-09	8.56934e-08	HeterovsWT		TNFAIP3	7128	ENSG00000118503	chr6	-1.66051	4.17304	-19.3426	6.63882e-11	2.37285e-09	HomovsWT
TNFAIP3	7128	ENSG00000118503	chr6	-1.1599	4.17304	-14.6127	2.12481e-09	8.58903e-08	HeterovsWT		SLC22A5	6584	ENSG00000197375	chr5	-1.70498	4.24297	-19.3546	6.5874e-11	2.37048e-09	HomovsWT
MOB3B	79817	ENSG00000120162	chr9	-1.24904	4.60244	-14.6054	2.1378e-09	8.61592e-08	HeterovsWT		PGK1	5230	ENSG00000102144	chrX	-0.787512	9.33708	-19.9517	4.50561e-11	1.82672e-09	HomovsWT
PEX1	5189	ENSG00000127980	chr7	-1.143	4.79633	-14.5658	2.20988e-09	8.85385e-08	HeterovsWT		ASXL1	171023	ENSG00000171456	chr20	0.80874	8.4025	19.8716	4.73824e-11	1.87623e-09	HomovsWT
ARHGEF6	9459	ENSG00000129675	chrX	-0.975808	8.37047	-14.5685	2.20481e-09	8.85385e-08	HeterovsWT		FCGR2B	2213	ENSG00000072694	chr1	-5.93764	0.706931	-21.5159	1.7487e-11	9.20578e-10	HomovsWT
AC126323.1	NA	NA	chr15	-1.09062	5.16645	-14.561	2.2187e-09	8.86304e-08	HeterovsWT		AJM1	389813	ENSG00000232434	chr9	1.81451	5.03464	19.3554	6.58429e-11	2.37048e-09	HomovsWT
GAB3	139716	ENSG00000160219	chrX	-0.957644	4.98701	-14.5446	2.24939e-09	8.95743e-08	HeterovsWT		BTK	695	ENSG00000010671	chrX	-1.0474	7.37077	-19.7607	5.0818e-11	1.96082e-09	HomovsWT
GTF2IRD1	9569	ENSG00000006704	chr7	5.83265	-1.33328	14.5414	2.25552e-09	8.95743e-08	HeterovsWT		CPNE5	57699	ENSG00000124772	chr6	-3.23946	2.92752	-19.1619	7.46404e-11	2.59337e-09	HomovsWT
APOOL	139322	ENSG00000155008	chrX	-0.817412	5.65418	-14.4966	2.34198e-09	9.27369e-08	HeterovsWT		TMC3-AS1	101929655	NA	chr15	-2.19444	3.9183	-19.1558	7.49382e-11	2.59646e-09	HomovsWT
OCRL	4952	ENSG00000122126	chrX	-0.985829	6.37675	-14.4306	2.47591e-09	9.77552e-08	HeterovsWT		POP1	10940	ENSG00000104356	chr8	1.26803	5.16809	19.4026	6.38683e-11	2.31941e-09	HomovsWT
ATXN7L1	222255	ENSG00000146776	chr7	0.960299	5.85817	14.4174	2.50368e-09	9.85651e-08	HeterovsWT		RHOH	399	ENSG00000168421	chr4	1.65967	3.62074	19.0986	7.77873e-11	2.65454e-09	HomovsWT
AC027117.2	NA	NA	chr8	-1.63627	1.54426	-14.3834	2.57691e-09	1.01155e-07	HeterovsWT		COL4A2	1284	ENSG00000134871	chr13	-1.62515	4.17889	-19.1368	7.58753e-11	2.60896e-09	HomovsWT
OSTF1	26578	ENSG00000134996	chr9	-0.849569	5.9315	-14.379	2.58648e-09	1.01238e-07	HeterovsWT		EDEM3	80267	ENSG00000116406	chr1	-0.879898	8.23294	-19.6822	5.341e-11	2.04342e-09	HomovsWT
FAM43A	131583	ENSG00000185112	chr3	-1.33329	5.45638	-14.3669	2.61312e-09	1.01987e-07	HeterovsWT		SPTLC2	9517	ENSG00000100596	chr14	1.20436	8.38839	19.6746	5.36696e-11	2.04758e-09	HomovsWT
RNF149	284996	ENSG00000163162	chr2	0.91993	6.21238	14.354	2.64192e-09	1.02815e-07	HeterovsWT		TMEM185B	79134	ENSG00000226479	chr2	-1.13682	6.61334	-19.479	6.08096e-11	2.24471e-09	HomovsWT
SLC27A2	11001	ENSG00000140284	chr15	1.71206	3.23147	14.3468	2.658e-09	1.03145e-07	HeterovsWT		NUMA1	4926	ENSG00000137497	chr11	0.980699	6.83273	19.4941	6.02207e-11	2.23669e-09	HomovsWT
NLRP7	199713	ENSG00000278173	chr19	-2.22737	3.11081	-14.3412	2.67072e-09	1.03232e-07	HeterovsWT		SIRPA	140885	ENSG00000198053	chr20	-0.86651	8.47263	-19.647	5.46201e-11	2.07586e-09	HomovsWT
TGFA	7039	ENSG00000163235	chr2	1.5077	3.25236	14.3391	2.67542e-09	1.03232e-07	HeterovsWT		NOTCH1	4851	ENSG00000148400	chr9	1.25374	7.5417	19.5703	5.73545e-11	2.1519e-09	HomovsWT
RNF113A	7737	ENSG00000125352	chrX	-1.31325	3.60151	-14.3315	2.69286e-09	1.0361e-07	HeterovsWT		CELF1	10658	ENSG00000149187	chr11	0.833444	7.91905	19.5936	5.65106e-11	2.12611e-09	HomovsWT
FYN	2534	ENSG00000010810	chr6	-1.01228	4.7957	-14.2995	2.76713e-09	1.06021e-07	HeterovsWT		PTAFR	5724	ENSG00000169403	chr1	-1.28668	5.38798	-19.2098	7.23517e-11	2.53268e-09	HomovsWT
LIPA	3988	ENSG00000107798	chr10	-0.811918	5.50319	-14.2978	2.77111e-09	1.06021e-07	HeterovsWT		PTPRF	5792	ENSG00000142949	chr1	1.39002	4.72136	19.0793	7.87763e-11	2.66154e-09	HomovsWT
STK26	51765	ENSG00000134602	chrX	-1.15514	7.40997	-14.2776	2.81936e-09	1.07563e-07	HeterovsWT		GNG2	54331	ENSG00000186469	chr14	1.58882	4.07969	19.0266	8.15417e-11	2.74133e-09	HomovsWT
ADNP2	22850	ENSG00000101544	chr18	0.743412	6.69617	14.2582	2.86631e-09	1.09048e-07	HeterovsWT		PPIE	10450	ENSG00000084072	chr1	-1.26844	5.02146	-19.084	7.85337e-11	2.66154e-09	HomovsWT
HADHB	3032	ENSG00000138029	chr2	0.688868	8.33869	14.2476	2.89249e-09	1.09737e-07	HeterovsWT		USP8	9101	ENSG00000138592	chr15	-1.1687	6.56854	-19.3541	6.58944e-11	2.37048e-09	HomovsWT
CHD3	1107	ENSG00000170004	chr17	0.60324	8.30209	14.2425	2.9049e-09	1.09901e-07	HeterovsWT		SDHAF3	57001	ENSG00000196636	chr7	-1.48276	5.21107	-19.1381	7.5811e-11	2.60896e-09	HomovsWT
SIRPA	140885	ENSG00000198053	chr20	-0.623594	8.47263	-14.225	2.94886e-09	1.11254e-07	HeterovsWT		OPLAH	26873	ENSG00000178814	chr8	-2.04144	3.75968	-18.8097	9.40766e-11	3.01356e-09	HomovsWT
LTBP1	4052	ENSG00000049323	chr2	-1.18165	4.27426	-14.2068	2.9951e-09	1.12379e-07	HeterovsWT		MITF	4286	ENSG00000187098	chr3	-1.432	4.00149	-18.879	8.98631e-11	2.94812e-09	HomovsWT
ARHGAP4	393	ENSG00000089820	chrX	-0.928469	7.43909	-14.2068	2.99523e-09	1.12379e-07	HeterovsWT		STAG2	10735	ENSG00000101972	chrX	-0.999364	8.35755	-19.47	6.11609e-11	2.25119e-09	HomovsWT
IGBP1	3476	ENSG00000089289	chrX	-0.805231	5.628	-14.1961	3.02274e-09	1.13099e-07	HeterovsWT		GALNT7	51809	ENSG00000109586	chr4	1.01326	6.98553	19.3482	6.61473e-11	2.37048e-09	HomovsWT
NUMA1	4926	ENSG00000137497	chr11	0.719152	6.83273	14.149	3.14747e-09	1.17442e-07	HeterovsWT		SOAT1	6646	ENSG00000057252	chr1	-0.95468	6.90846	-19.31	6.7802e-11	2.4044e-09	HomovsWT
RELB	5971	ENSG00000104856	chr19	-1.42682	3.44742	-14.1392	3.17404e-09	1.18109e-07	HeterovsWT		CDKAL1	54901	ENSG00000145996	chr6	-1.05223	6.96453	-19.3269	6.70625e-11	2.3844e-09	HomovsWT
MEX3A	92312	ENSG00000254726	chr1	1.31969	4.29279	14.1342	3.18763e-09	1.18291e-07	HeterovsWT		EPG5	57724	ENSG00000152223	chr18	0.847673	7.5031	19.3486	6.61291e-11	2.37048e-09	HomovsWT
RORB	6096	ENSG00000198963	chr9	-1.30749	5.90537	-14.1191	3.22941e-09	1.19515e-07	HeterovsWT		KBTBD2	25948	ENSG00000170852	chr7	0.902656	6.53871	19.2549	7.0262e-11	2.4787e-09	HomovsWT
LMO7	4008	ENSG00000136153	chr13	1.05767	5.25494	14.1126	3.24762e-09	1.19862e-07	HeterovsWT		NSD2	7468	ENSG00000109685	chr4	0.754961	9.54155	19.4572	6.16632e-11	2.25744e-09	HomovsWT
CDK14	5218	ENSG00000058091	chr7	-0.923001	7.40578	-14.1007	3.28107e-09	1.20768e-07	HeterovsWT		IFNGR1	3459	ENSG00000027697	chr6	-1.10625	5.78246	-19.1096	7.72317e-11	2.64523e-09	HomovsWT
PRTG	283659	ENSG00000166450	chr15	-5.165	-1.10253	-14.0799	3.3405e-09	1.22623e-07	HeterovsWT		SMOX	54498	ENSG00000088826	chr20	-1.46606	4.0847	-18.8201	9.34297e-11	2.99991e-09	HomovsWT
ATRX	546	ENSG00000085224	chrX	-0.793508	7.10611	-14.0637	3.3875e-09	1.24014e-07	HeterovsWT		AC106729.1	NA	NA	chr16	-9.84497	-1.81193	-26.7359	1.12652e-12	1.48548e-10	HomovsWT
AC009646.2	NA	NA	chr8	-1.92418	3.25291	-14.0105	3.54719e-09	1.28817e-07	HeterovsWT		ATP6AP1	537	ENSG00000071553	chrX	-0.950296	7.07625	-19.2762	6.93022e-11	2.4512e-09	HomovsWT
ZNF827	152485	ENSG00000151612	chr4	3.92556	1.80959	14.0139	3.53677e-09	1.28817e-07	HeterovsWT		ASPH	444	ENSG00000198363	chr8	-11.2601	1.64075	-26.4544	1.28826e-12	1.63525e-10	HomovsWT
CSTF2	1478	ENSG00000101811	chrX	-0.764378	5.36836	-14.0074	3.55664e-09	1.28817e-07	HeterovsWT		RIPK2	8767	ENSG00000104312	chr8	-4.71632	1.39639	-19.8844	4.70008e-11	1.87372e-09	HomovsWT
YWHAG	7532	ENSG00000170027	chr7	-0.640717	9.03009	-14.0104	3.54757e-09	1.28817e-07	HeterovsWT		ARID1B	57492	ENSG00000049618	chr6	-1.10283	8.27697	-19.3368	6.66346e-11	2.37541e-09	HomovsWT
MPP3	4356	ENSG00000161647	chr17	6.02061	-0.747427	14.0013	3.57573e-09	1.29164e-07	HeterovsWT		CD276	80381	ENSG00000103855	chr15	-10.0574	0.639555	-26.6239	1.18808e-12	1.52231e-10	HomovsWT
CCL2	6347	ENSG00000108691	chr17	-2.99055	3.31662	-13.9547	3.72331e-09	1.33815e-07	HeterovsWT		CAMKV	79012	ENSG00000164076	chr3	-9.69043	0.0469575	-26.6813	1.1561e-12	1.49544e-10	HomovsWT
PTPRU	10076	ENSG00000060656	chr1	-1.06759	4.79671	-13.9544	3.7242e-09	1.33815e-07	HeterovsWT		AIFM1	9131	ENSG00000156709	chrX	-0.934987	6.22688	-19.1395	7.57383e-11	2.60896e-09	HomovsWT
TET1	80312	ENSG00000138336	chr10	1.77979	2.56659	13.9248	3.82159e-09	1.36592e-07	HeterovsWT		FAM135B	51059	ENSG00000147724	chr8	-7.44279	1.65369	-21.188	2.12066e-11	1.06284e-09	HomovsWT
ARHGAP26	23092	ENSG00000145819	chr5	-0.730205	6.81847	-13.9276	3.81218e-09	1.36592e-07	HeterovsWT		KAZN	23254	ENSG00000189337	chr1	-1.18295	5.85823	-19.0123	8.2312e-11	2.7604e-09	HomovsWT
LAIR1	3903	ENSG00000278154	chr19	-0.672323	7.61767	-13.8958	3.91964e-09	1.39363e-07	HeterovsWT		FAM210B	116151	ENSG00000124098	chr20	-1.39883	5.06523	-18.8316	9.27265e-11	2.98617e-09	HomovsWT
TP73-AS1	57212	ENSG00000227372	chr1	-6.48629	-2.70029	-13.8983	3.91084e-09	1.39363e-07	HeterovsWT		ENTPD6	955	ENSG00000197586	chr20	-1.12992	6.4596	-19.0577	7.99008e-11	2.69284e-09	HomovsWT
KCTD12	115207	ENSG00000178695	chr13	5.27999	-1.29745	13.8572	4.05411e-09	1.43768e-07	HeterovsWT		AC246817.2	NA	NA	chr8	-1.41133	4.96692	-18.7702	9.65751e-11	3.07907e-09	HomovsWT
F8	2157	ENSG00000185010	chrX	-1.19273	4.43086	-13.854	4.06557e-09	1.43798e-07	HeterovsWT		CSTF2	1478	ENSG00000101811	chrX	-1.06275	5.36836	-18.8699	9.04063e-11	2.95879e-09	HomovsWT
AC027250.2	NA	NA	chr8	-1.44441	2.63152	-13.8387	4.12048e-09	1.44985e-07	HeterovsWT		DNAJC1	64215	ENSG00000136770	chr10	1.06506	6.68385	19.0806	7.87092e-11	2.66154e-09	HomovsWT
ZDHHC9	51114	ENSG00000188706	chrX	-1.07219	4.75955	-13.8404	4.1141e-09	1.44985e-07	HeterovsWT		PML	5371	ENSG00000140464	chr15	-1.17059	5.93576	-18.9294	8.69249e-11	2.88267e-09	HomovsWT
KIF15	56992	ENSG00000163808	chr3	0.654857	7.62284	13.8284	4.15758e-09	1.45913e-07	HeterovsWT		RAB11FIP1	80223	ENSG00000156675	chr8	0.9565	6.01637	18.977	8.42421e-11	2.81506e-09	HomovsWT
NKAPP1	158801	ENSG00000233382	chrX	-1.3662	2.83911	-13.8019	4.25562e-09	1.48969e-07	HeterovsWT		SEZ6L2	26470	ENSG00000174938	chr16	-1.66069	4.47423	-18.5931	1.08689e-10	3.37806e-09	HomovsWT
FCMR	9214	ENSG00000162894	chr1	-1.80415	2.04763	-13.7769	4.35012e-09	1.51885e-07	HeterovsWT		DIS3L	115752	ENSG00000166938	chr15	-1.08958	5.58829	-18.8592	9.10454e-11	2.96439e-09	HomovsWT
USP25	29761	ENSG00000155313	chr21	-1.03818	5.8727	-13.765	4.39607e-09	1.53096e-07	HeterovsWT		MAMLD1	10046	ENSG00000013619	chrX	-1.4712	3.47578	-18.5687	1.10478e-10	3.41523e-09	HomovsWT
OR52K3P	390035	NA	chr11	-1.70457	2.19603	-13.7588	4.4201e-09	1.53539e-07	HeterovsWT		IFNGR2	3460	ENSG00000262795	chr21	1.01057	6.18254	18.9707	8.45934e-11	2.81605e-09	HomovsWT
HSPA8	3312	ENSG00000109971	chr11	0.656291	9.29656	13.7355	4.51175e-09	1.56323e-07	HeterovsWT		PAXIP1	22976	ENSG00000157212	chr7	0.959013	5.83212	18.8955	8.88893e-11	2.92816e-09	HomovsWT
SLC25A13	10165	ENSG00000004864	chr7	-0.678821	7.57237	-13.72	4.57417e-09	1.58082e-07	HeterovsWT		DHCR24	1718	ENSG00000116133	chr1	1.08556	9.34417	19.1871	7.34281e-11	2.56376e-09	HomovsWT
THOC2	57187	ENSG00000125676	chrX	-0.750285	7.31162	-13.6995	4.65774e-09	1.60562e-07	HeterovsWT		GLRA2	2742	ENSG00000101958	chrX	-1.92863	4.05295	-18.5208	1.14092e-10	3.49797e-09	HomovsWT
BLNK	29760	ENSG00000095585	chr10	-3.68618	0.0625075	-13.6929	4.68515e-09	1.61098e-07	HeterovsWT		SHISA2	387914	ENSG00000180730	chr13	-9.89531	0.31715	-25.7533	1.81034e-12	2.03207e-10	HomovsWT
TROAP	10024	ENSG00000135451	chr12	0.794165	5.89916	13.6778	4.74807e-09	1.62031e-07	HeterovsWT		CADM1	23705	ENSG00000182985	chr11	-10.007	-2.15075	-25.7241	1.83654e-12	2.04458e-10	HomovsWT
ZEB1	6935	ENSG00000148516	chr10	5.82032	1.79523	13.6778	4.74806e-09	1.62031e-07	HeterovsWT		COPS6	10980	ENSG00000168090	chr7	-0.931224	7.05462	-18.9749	8.43564e-11	2.81506e-09	HomovsWT
TRRAP	8295	ENSG00000196367	chr7	-0.743301	8.71271	-13.6812	4.73357e-09	1.62031e-07	HeterovsWT		TMTC2	160335	ENSG00000179104	chr12	1.46792	4.33571	18.567	1.10604e-10	3.41523e-09	HomovsWT
AATK	9625	ENSG00000181409	chr17	-1.95379	1.36562	-13.6144	5.02274e-09	1.70518e-07	HeterovsWT		GDAP1	54332	ENSG00000104381	chr8	-3.03757	2.23775	-18.4708	1.17996e-10	3.58529e-09	HomovsWT
PLCL1	5334	ENSG00000115896	chr2	-1.11673	3.23959	-13.6118	5.03445e-09	1.70518e-07	HeterovsWT		SOWAHC	65124	ENSG00000198142	chr2	-5.04743	1.21446	-20.5254	3.15914e-11	1.39763e-09	HomovsWT
MIR222HG	104457406	NA	chrX	-0.882848	5.73974	-13.6159	5.01605e-09	1.70518e-07	HeterovsWT		ABHD17C	58489	ENSG00000136379	chr15	-0.936069	6.76138	-18.8929	8.9039e-11	2.92816e-09	HomovsWT
ZNF121	7675	ENSG00000197961	chr19	-0.724937	7.17235	-13.5957	5.10724e-09	1.72553e-07	HeterovsWT		LYPLAL1	127018	ENSG00000143353	chr1	-1.29517	5.35126	-18.6334	1.05793e-10	3.33382e-09	HomovsWT
FAM3A	60343	ENSG00000071889	chrX	-1.02804	4.77281	-13.5901	5.13249e-09	1.72976e-07	HeterovsWT		ATP2C1	27032	ENSG00000017260	chr3	-0.860625	7.19116	-18.9116	8.79518e-11	2.90648e-09	HomovsWT
MMGT1	93380	ENSG00000169446	chrX	-0.820738	5.98213	-13.5712	5.21976e-09	1.75482e-07	HeterovsWT		RAB32	10981	ENSG00000118508	chr6	-1.26748	5.36928	-18.6375	1.05505e-10	3.33248e-09	HomovsWT
NXT2	55916	ENSG00000101888	chrX	-1.0619	4.70933	-13.5552	5.29499e-09	1.77572e-07	HeterovsWT		SH3TC1	54436	ENSG00000125089	chr4	1.52238	6.09765	18.7489	9.79542e-11	3.10844e-09	HomovsWT
NHS	4810	ENSG00000188158	chrX	-1.8487	3.20211	-13.5382	5.37618e-09	1.79483e-07	HeterovsWT		MYO9A	4649	ENSG00000066933	chr15	-0.990412	6.62232	-18.8307	9.27817e-11	2.98617e-09	HomovsWT
NCAPH	23397	ENSG00000121152	chr2	0.942242	6.88959	13.5377	5.37842e-09	1.79483e-07	HeterovsWT		SLX4	84464	ENSG00000188827	chr16	1.16808	4.91026	18.5276	1.13574e-10	3.49275e-09	HomovsWT
IRF8	3394	ENSG00000140968	chr16	-0.652787	5.96363	-13.5298	5.41641e-09	1.80308e-07	HeterovsWT		NCAM1	4684	ENSG00000149294	chr11	-2.80532	3.22574	-18.2088	1.40958e-10	4.14547e-09	HomovsWT
SUMF2	25870	ENSG00000129103	chr7	0.631829	8.05991	13.526	5.43495e-09	1.80483e-07	HeterovsWT		STAG1	10274	ENSG00000118007	chr3	0.838161	6.89989	18.8392	9.22563e-11	2.98617e-09	HomovsWT
WDR90	197335	ENSG00000161996	chr16	1.04899	7.15618	13.5211	5.45891e-09	1.80836e-07	HeterovsWT		UBE3C	9690	ENSG00000009335	chr7	0.838831	7.85262	18.9277	8.70192e-11	2.88267e-09	HomovsWT
OPA1	4976	ENSG00000198836	chr3	-0.699185	7.70335	-13.5167	5.48031e-09	1.81103e-07	HeterovsWT		C2orf88	84281	ENSG00000187699	chr2	-1.88191	3.18026	-18.2029	1.41531e-10	4.14547e-09	HomovsWT
NTRK3	4916	ENSG00000140538	chr15	-1.02709	3.801	-13.5128	5.49936e-09	1.81116e-07	HeterovsWT		RRAGD	58528	ENSG00000025039	chr6	0.974658	6.53723	18.76	9.72344e-11	3.09283e-09	HomovsWT
CHM	1121	ENSG00000188419	chrX	-0.981582	5.49226	-13.5112	5.50736e-09	1.81116e-07	HeterovsWT		SPTAN1	6709	ENSG00000197694	chr9	1.02058	7.6415	18.861	9.09359e-11	2.96439e-09	HomovsWT
AC013565.1	NA	NA	chr15	-5.35856	-1.67025	-13.5029	5.54867e-09	1.82034e-07	HeterovsWT		MTX1P1	4581	ENSG00000236675	chr1	-1.62119	3.9257	-18.2382	1.3816e-10	4.09713e-09	HomovsWT
RHBDD2	57414	ENSG00000005486	chr7	-0.855163	5.49038	-13.489	5.61787e-09	1.8386e-07	HeterovsWT		LINC01685	105378656	NA	chr1	-9.70503	-0.689403	-25.1286	2.47022e-12	2.50377e-10	HomovsWT
RFX8	731220	ENSG00000196460	chr2	0.928028	6.02329	13.4811	5.6578e-09	1.84722e-07	HeterovsWT		LAS1L	81887	ENSG00000001497	chrX	-0.862376	6.36771	-18.7018	1.01073e-10	3.19995e-09	HomovsWT
VPS50	55610	ENSG00000004766	chr7	-0.763166	5.99725	-13.4743	5.69262e-09	1.85413e-07	HeterovsWT		INTS14	81556	ENSG00000138614	chr15	-1.18487	6.03437	-18.6102	1.07453e-10	3.36275e-09	HomovsWT
AJM1	389813	ENSG00000232434	chr9	1.30018	5.03464	13.4424	5.85811e-09	1.90346e-07	HeterovsWT		SCRN3	79634	ENSG00000144306	chr2	-2.09953	4.13198	-18.1567	1.46073e-10	4.23019e-09	HomovsWT
ITGAM	3684	ENSG00000169896	chr16	-1.0352	4.0192	-13.4349	5.89798e-09	1.91185e-07	HeterovsWT		PIGX	54965	ENSG00000163964	chr3	-1.30029	4.89034	-18.3881	1.24782e-10	3.74126e-09	HomovsWT
CPM	1368	ENSG00000135678	chr12	-1.06279	3.42698	-13.4175	5.99069e-09	1.93727e-07	HeterovsWT		OCRL	4952	ENSG00000122126	chrX	-1.30679	6.37675	-18.6123	1.07296e-10	3.36275e-09	HomovsWT
ZNF280C	55609	ENSG00000056277	chrX	-1.13638	5.40311	-13.4106	6.02821e-09	1.94023e-07	HeterovsWT		CDK6	1021	ENSG00000105810	chr7	-1.07086	9.72629	-18.8561	9.1232e-11	2.96439e-09	HomovsWT
PDAP1	11333	ENSG00000106244	chr7	-0.683838	6.98126	-13.4086	6.03926e-09	1.94023e-07	HeterovsWT		DNAH14	127602	ENSG00000185842	chr1	-1.34652	5.33291	-18.4075	1.23156e-10	3.70887e-09	HomovsWT
NCAPG2	54892	ENSG00000146918	chr7	0.633821	8.55188	13.4079	6.04269e-09	1.94023e-07	HeterovsWT		AC004980.1	NA	NA	chr7	-1.25174	6.22982	-18.5932	1.08679e-10	3.37806e-09	HomovsWT
CFAP97	57587	ENSG00000164323	chr4	1.36839	3.91975	13.3969	6.10288e-09	1.95494e-07	HeterovsWT		CYB5A	1528	ENSG00000166347	chr18	8.93603	0.110764	24.9737	2.67107e-12	2.66753e-10	HomovsWT
LINC02218	102723526	ENSG00000249662	chr5	-2.53157	2.06645	-13.3917	6.13198e-09	1.95964e-07	HeterovsWT		PHKA2	5256	ENSG00000044446	chrX	-0.992222	6.77993	-18.6236	1.06489e-10	3.34798e-09	HomovsWT
MOSPD3	64598	ENSG00000106330	chr7	-1.02913	5.87062	-13.3889	6.14742e-09	1.95996e-07	HeterovsWT		NOM1	64434	ENSG00000146909	chr7	0.957955	6.14982	18.5666	1.10639e-10	3.41523e-09	HomovsWT
NKAP	79576	ENSG00000101882	chrX	-1.31597	3.26373	-13.3721	6.24152e-09	1.9853e-07	HeterovsWT		AMER1	139285	ENSG00000184675	chrX	-1.20678	5.12305	-18.3461	1.2838e-10	3.83222e-09	HomovsWT
PFKFB4	5210	ENSG00000114268	chr3	1.06357	4.89635	13.3641	6.28649e-09	1.99493e-07	HeterovsWT		WWP1	11059	ENSG00000123124	chr8	-4.07581	2.44746	-18.1473	1.47022e-10	4.24862e-09	HomovsWT
ARHGEF12	23365	ENSG00000196914	chr11	-0.674166	5.78685	-13.3542	6.34305e-09	2.00819e-07	HeterovsWT		ZDHHC9	51114	ENSG00000188706	chrX	-1.49142	4.75955	-18.2216	1.39732e-10	4.13474e-09	HomovsWT
IRS1	3667	ENSG00000169047	chr2	1.04995	4.77074	13.3446	6.39819e-09	2.02094e-07	HeterovsWT		FCAR	2204	ENSG00000284245	chr19	-1.62941	3.13162	-18	1.62703e-10	4.57674e-09	HomovsWT
CASTOR2	729438	ENSG00000274070	chr7	-1.02937	5.43584	-13.3327	6.46799e-09	2.02415e-07	HeterovsWT		EVL	51466	ENSG00000196405	chr14	0.915276	6.58513	18.5264	1.13665e-10	3.49275e-09	HomovsWT
NEURL1B	54492	ENSG00000214357	chr5	0.884907	5.45479	13.3402	6.42419e-09	2.02415e-07	HeterovsWT		UST	10090	ENSG00000111962	chr6	-1.37314	5.41055	-18.2867	1.33673e-10	3.97274e-09	HomovsWT
POR	5447	ENSG00000127948	chr7	-0.779148	6.45157	-13.3348	6.45578e-09	2.02415e-07	HeterovsWT		ZKSCAN1	7586	ENSG00000106261	chr7	-0.862897	7.59645	-18.603	1.07966e-10	3.37102e-09	HomovsWT
RFWD3	55159	ENSG00000168411	chr16	0.58792	7.40662	13.3373	6.44104e-09	2.02415e-07	HeterovsWT		CLSPN	63967	ENSG00000092853	chr1	1.2708	6.79939	18.4988	1.15793e-10	3.54212e-09	HomovsWT
EMC10	284361	ENSG00000161671	chr19	5.04678	0.334431	13.3278	6.49675e-09	2.02848e-07	HeterovsWT		RYR2	6262	ENSG00000198626	chr1	-9.60302	-0.101517	-23.5991	5.46145e-12	4.26307e-10	HomovsWT
PRUNE2	158471	ENSG00000106772	chr9	-1.97801	0.822684	-13.3219	6.53138e-09	2.03461e-07	HeterovsWT		MTX3	345778	ENSG00000177034	chr5	-1.46235	4.03358	-18.0009	1.62601e-10	4.57674e-09	HomovsWT
ZBTB16	7704	ENSG00000109906	chr11	1.45385	1.37945	13.3075	6.61745e-09	2.04459e-07	HeterovsWT		PIK3C2B	5287	ENSG00000133056	chr1	-0.967026	6.21966	-18.3905	1.24576e-10	3.74126e-09	HomovsWT
F13A1	2162	ENSG00000124491	chr6	-3.5548	-0.610613	-13.3013	6.65478e-09	2.04459e-07	HeterovsWT		PTPRH	5794	ENSG00000080031	chr19	-3.09161	1.68352	-18.202	1.41621e-10	4.14547e-09	HomovsWT
TRMT12	55039	ENSG00000183665	chr8	-1.39795	3.21484	-13.3009	6.65728e-09	2.04459e-07	HeterovsWT		SERPINE2	5270	ENSG00000135919	chr2	0.912837	6.74476	18.4589	1.18948e-10	3.603e-09	HomovsWT
ATP9A	10079	ENSG00000054793	chr20	-1.3599	3.04776	-13.2965	6.68382e-09	2.04459e-07	HeterovsWT		SNX10	29887	ENSG00000086300	chr7	1.56477	5.28245	18.2133	1.40526e-10	4.14547e-09	HomovsWT
SLFN13	146857	ENSG00000154760	chr17	0.925171	6.32085	13.3097	6.60419e-09	2.04459e-07	HeterovsWT		PTGS1	5742	ENSG00000095303	chr9	0.83194	6.92812	18.4828	1.17045e-10	3.56543e-09	HomovsWT
CPT1A	1374	ENSG00000110090	chr11	0.637579	8.13153	13.3076	6.61636e-09	2.04459e-07	HeterovsWT		ADAMTS9	56999	ENSG00000163638	chr3	-10.5075	0.613337	-24.0852	4.22209e-12	3.53978e-10	HomovsWT
APMAP	57136	ENSG00000101474	chr20	-0.623137	7.91846	-13.3022	6.64895e-09	2.04459e-07	HeterovsWT		PLXNC1	10154	ENSG00000136040	chr12	0.943789	6.86835	18.4536	1.19375e-10	3.603e-09	HomovsWT
RPL10	6134	ENSG00000147403	chrX	-0.802276	10.0182	-13.2971	6.68025e-09	2.04459e-07	HeterovsWT		SH3RF3	344558	ENSG00000172985	chr2	-0.935321	7.45252	-18.4539	1.19348e-10	3.603e-09	HomovsWT
AGFG2	3268	ENSG00000106351	chr7	-0.864486	4.89086	-13.2772	6.80181e-09	2.076e-07	HeterovsWT		DNAJC15	29103	ENSG00000120675	chr13	-5.31625	1.87428	-18.8012	9.46121e-11	3.02358e-09	HomovsWT
SHISA2	387914	ENSG00000180730	chr13	-1.32479	0.31715	-13.2734	6.82514e-09	2.07845e-07	HeterovsWT		SCML1	6322	ENSG00000047634	chrX	-1.46318	4.06525	-17.8987	1.74521e-10	4.82757e-09	HomovsWT
ZNF302	55900	ENSG00000089335	chr19	-1.11927	3.59315	-13.2172	7.18384e-09	2.17327e-07	HeterovsWT		DENND5B	160518	ENSG00000170456	chr12	8.25796	-0.666652	24.3028	3.76866e-12	3.32376e-10	HomovsWT
FAM122B	NA	NA	chrX	-0.98035	6.69932	-13.2198	7.16705e-09	2.17327e-07	HeterovsWT		DOCK3	1795	ENSG00000088538	chr3	-1.44002	4.48722	-17.9995	1.62757e-10	4.57674e-09	HomovsWT
DKC1	1736	ENSG00000130826	chrX	-0.780453	7.53847	-13.2171	7.1845e-09	2.17327e-07	HeterovsWT		CYSLTR1	10800	ENSG00000173198	chrX	-1.3372	4.45889	-17.987	1.64171e-10	4.60698e-09	HomovsWT
NXT1	29107	ENSG00000132661	chr20	-0.799605	4.99195	-13.2108	7.22607e-09	2.18099e-07	HeterovsWT		AL356414.1	NA	NA	chr20	-2.35016	2.42556	-17.6965	2.00973e-10	5.35218e-09	HomovsWT
C8B	732	ENSG00000021852	chr1	-2.79253	-0.959637	-13.205	7.26415e-09	2.18762e-07	HeterovsWT		PRDM13	59336	ENSG00000112238	chr6	8.80009	-0.176468	23.9341	4.57115e-12	3.74008e-10	HomovsWT
RTN1	6252	ENSG00000139970	chr14	3.14584	1.24595	13.1929	7.34491e-09	2.20705e-07	HeterovsWT		PDLIM7	9260	ENSG00000196923	chr5	0.976708	5.76816	18.1705	1.44698e-10	4.20832e-09	HomovsWT
NEDD4L	23327	ENSG00000049759	chr18	0.825844	6.06106	13.1741	7.47272e-09	2.2405e-07	HeterovsWT		ARHGEF9	23229	ENSG00000131089	chrX	-1.07873	5.02373	-18.0535	1.5681e-10	4.46498e-09	HomovsWT
GNS	2799	ENSG00000135677	chr12	-0.591529	7.40181	-13.1692	7.50641e-09	2.24564e-07	HeterovsWT		TAF1	6872	ENSG00000147133	chrX	-0.847058	7.133	-18.349	1.28131e-10	3.83222e-09	HomovsWT
GJA3	2700	ENSG00000121743	chr13	2.28666	1.6618	13.1662	7.52671e-09	2.24676e-07	HeterovsWT		GREB1	9687	ENSG00000196208	chr2	1.07213	5.36997	18.076	1.54401e-10	4.41491e-09	HomovsWT
BUD31	8896	ENSG00000106245	chr7	-0.972896	4.94405	-13.1613	7.56106e-09	2.25207e-07	HeterovsWT		NUP37	79023	ENSG00000075188	chr12	-1.21099	4.86408	-17.9643	1.66766e-10	4.67014e-09	HomovsWT
SLC38A10	124565	ENSG00000157637	chr17	0.839272	8.23166	13.131	7.77365e-09	2.31032e-07	HeterovsWT		RBM41	55285	ENSG00000089682	chrX	-9.41886	0.919549	-23.6447	5.33001e-12	4.20885e-10	HomovsWT
RENBP	5973	ENSG00000102032	chrX	-1.30217	5.01984	-13.1192	7.85849e-09	2.31614e-07	HeterovsWT		CEP89	84902	ENSG00000121289	chr19	1.03631	4.95017	17.9577	1.67525e-10	4.68175e-09	HomovsWT
GCNT1	2650	ENSG00000187210	chr9	-0.758796	5.99894	-13.1212	7.84382e-09	2.31614e-07	HeterovsWT		BRI3	25798	ENSG00000164713	chr7	-1.18254	7.14671	-18.299	1.32555e-10	3.94817e-09	HomovsWT
SMAD4	4089	ENSG00000141646	chr18	0.792614	6.70606	13.1188	7.86143e-09	2.31614e-07	HeterovsWT		MTX2	10651	ENSG00000128654	chr2	-1.53864	5.97695	-18.0688	1.55166e-10	4.42744e-09	HomovsWT
MEIS1	4211	ENSG00000143995	chr2	-0.953662	8.34748	-13.1193	7.85808e-09	2.31614e-07	HeterovsWT		NXT1	29107	ENSG00000132661	chr20	-1.12804	4.99195	-17.9369	1.69954e-10	4.73015e-09	HomovsWT
CAB39L	81617	ENSG00000102547	chr13	-0.778726	6.01129	-13.0835	8.12058e-09	2.38731e-07	HeterovsWT		AKAP9	10142	ENSG00000127914	chr7	-1.16304	6.86203	-18.2074	1.41101e-10	4.14547e-09	HomovsWT
MSN	4478	ENSG00000147065	chrX	-0.620129	10.5004	-13.0765	8.17301e-09	2.39753e-07	HeterovsWT		APAF1	317	ENSG00000120868	chr12	0.87684	6.47516	18.1321	1.48556e-10	4.28383e-09	HomovsWT
KIAA1217	56243	ENSG00000120549	chr10	-2.1638	1.85047	-13.0698	8.22389e-09	2.40595e-07	HeterovsWT		DTX4	23220	ENSG00000110042	chr11	1.63519	3.87229	17.655	2.06914e-10	5.46753e-09	HomovsWT
TRBV7-2	28596	ENSG00000282939	chr7	-5.90972	-3.51954	-13.0681	8.23714e-09	2.40595e-07	HeterovsWT		ZFAND1	79752	ENSG00000104231	chr8	-10.4329	0.564385	-23.225	6.68112e-12	4.90503e-10	HomovsWT
DEPTOR	64798	ENSG00000155792	chr8	-0.947061	3.71732	-13.064	8.26827e-09	2.40986e-07	HeterovsWT		FAP	2191	ENSG00000078098	chr2	-9.6431	-0.437419	-23.3132	6.36906e-12	4.72703e-10	HomovsWT
ESPL1	9700	ENSG00000135476	chr12	0.827187	7.38241	13.0609	8.29133e-09	2.41141e-07	HeterovsWT		TMEM117	84216	ENSG00000139173	chr12	-1.56872	4.0501	-17.6551	2.06896e-10	5.46753e-09	HomovsWT
INPP4A	3631	ENSG00000040933	chr2	0.592709	7.67693	13.0461	8.40559e-09	2.4371e-07	HeterovsWT		ZFPM2-AS1	102723356	NA	chr8	-5.70354	1.28324	-19.083	7.85859e-11	2.66154e-09	HomovsWT
VMA21	203547	ENSG00000160131	chrX	-0.809973	7.5504	-13.0448	8.41557e-09	2.4371e-07	HeterovsWT		SLC22A20P	440044	ENSG00000197847	chr11	1.36911	4.97298	17.7575	1.92559e-10	5.22023e-09	HomovsWT
IQGAP3	128239	ENSG00000183856	chr1	0.675481	7.09026	13.0282	8.54594e-09	2.4696e-07	HeterovsWT		LMBR1	64327	ENSG00000105983	chr7	0.916913	7.45406	18.1672	1.45028e-10	4.20892e-09	HomovsWT
POM121	9883	ENSG00000196313	chr7	-0.628271	7.8373	-13.0164	8.63961e-09	2.49136e-07	HeterovsWT		ELMSAN1	NA	NA	chr14	0.936493	7.11996	18.1132	1.50496e-10	4.32143e-09	HomovsWT
AP1S2	8905	ENSG00000182287	chrX	-1.05115	6.1376	-13.0141	8.65806e-09	2.49139e-07	HeterovsWT		COPS2	9318	ENSG00000166200	chr15	-1.17207	7.45809	-18.1213	1.49664e-10	4.30664e-09	HomovsWT
FOXRED2	80020	ENSG00000100350	chr22	0.779976	6.59563	13.0109	8.68348e-09	2.49343e-07	HeterovsWT		ZNF496	84838	ENSG00000162714	chr1	-1.44035	4.23041	-17.5204	2.27534e-10	5.89766e-09	HomovsWT
CIT	11113	ENSG00000122966	chr12	0.690311	7.388	13.0036	8.74215e-09	2.50498e-07	HeterovsWT		AC068587.4	NA	NA	chr8	-1.29892	5.35047	-17.759	1.92366e-10	5.22023e-09	HomovsWT
MDFIC	29969	ENSG00000135272	chr7	0.953622	5.74418	12.9862	8.88437e-09	2.54037e-07	HeterovsWT		HIST1H1D	NA	NA	chr6	1.43599	8.85145	18.1764	1.44119e-10	4.20048e-09	HomovsWT
PCSK5	5125	ENSG00000099139	chr9	-1.22535	4.44535	-12.9832	8.90958e-09	2.54223e-07	HeterovsWT		PCOLCE2	26577	ENSG00000163710	chr3	-1.88069	3.43055	-17.4036	2.47208e-10	6.29939e-09	HomovsWT
PSTPIP2	9050	ENSG00000152229	chr18	3.71566	0.64975	12.9748	8.97919e-09	2.55137e-07	HeterovsWT		ESYT3	83850	ENSG00000158220	chr3	-8.98314	0.0754784	-23.0267	7.44381e-12	5.21144e-10	HomovsWT
FAM133B	257415	ENSG00000234545	chr7	-0.759115	5.67982	-12.9768	8.96228e-09	2.55137e-07	HeterovsWT		CD82	3732	ENSG00000085117	chr11	1.68526	5.03287	17.7056	1.99694e-10	5.32857e-09	HomovsWT
ZNF3	7551	ENSG00000166526	chr7	-0.703127	5.99889	-12.9585	9.11624e-09	2.5849e-07	HeterovsWT		PLOD3	8985	ENSG00000106397	chr7	-1.29514	8.34528	-18.1084	1.51002e-10	4.3268e-09	HomovsWT
CSPG4	1464	ENSG00000173546	chr15	1.24204	3.51387	12.9475	9.20946e-09	2.60589e-07	HeterovsWT		ADGRB1	575	ENSG00000181790	chr8	-1.42314	6.14172	-17.8557	1.7981e-10	4.93371e-09	HomovsWT
AC098820.2	NA	NA	chr2	-3.33219	0.109009	-12.9433	9.2451e-09	2.61054e-07	HeterovsWT		INSM1	3642	ENSG00000173404	chr20	-8.28059	-0.78002	-23.1166	7.08708e-12	5.09295e-10	HomovsWT
TMEM243	79161	ENSG00000135185	chr7	-0.955961	4.51886	-12.9242	9.41154e-09	2.65202e-07	HeterovsWT		P2RY2	5029	ENSG00000175591	chr11	-1.65846	4.54264	-17.4951	2.3165e-10	5.95884e-09	HomovsWT
TPX2	22974	ENSG00000088325	chr20	0.538963	9.33893	12.901	9.61657e-09	2.70419e-07	HeterovsWT		SLC50A1	55974	ENSG00000169241	chr1	-1.35158	4.87193	-17.6158	2.12706e-10	5.58795e-09	HomovsWT
MSI2	124540	ENSG00000153944	chr17	0.671433	7.56284	12.8971	9.65183e-09	2.7085e-07	HeterovsWT		EMB	133418	ENSG00000170571	chr5	-1.3748	7.72988	-18.0132	1.61229e-10	4.57165e-09	HomovsWT
PDCD1	5133	ENSG00000188389	chr2	6.47345	-1.22233	12.8681	9.91619e-09	2.77694e-07	HeterovsWT		NOS1AP	9722	ENSG00000198929	chr1	-2.01622	2.87279	-17.2759	2.70838e-10	6.78694e-09	HomovsWT
ZDHHC11	79844	ENSG00000188818	chr5	-2.00163	0.832011	-12.8508	1.00787e-08	2.79044e-07	HeterovsWT		C15orf41	NA	NA	chr15	-1.71357	4.25776	-17.4307	2.42485e-10	6.19591e-09	HomovsWT
CLDN15	24146	ENSG00000106404	chr7	-0.807134	4.70379	-12.8527	1.00603e-08	2.79044e-07	HeterovsWT		DNAJB6	10049	ENSG00000105993	chr7	0.930508	7.0844	17.9533	1.68045e-10	4.68662e-09	HomovsWT
VBP1	7411	ENSG00000155959	chrX	-0.996585	6.6265	-12.8498	1.00876e-08	2.79044e-07	HeterovsWT		AATK	9625	ENSG00000181409	chr17	-4.68323	1.36562	-18.0018	1.62498e-10	4.57674e-09	HomovsWT
HPRT1	3251	ENSG00000165704	chrX	-0.703489	6.85508	-12.859	1.00011e-08	2.79044e-07	HeterovsWT		MDFIC	29969	ENSG00000135272	chr7	1.27731	5.74418	17.7167	1.98142e-10	5.30237e-09	HomovsWT
TRIB3	57761	ENSG00000101255	chr20	-1.07818	7.50562	-12.8557	1.00327e-08	2.79044e-07	HeterovsWT		ANTXR2	118429	ENSG00000163297	chr4	-0.828198	7.20151	-17.9271	1.71116e-10	4.74306e-09	HomovsWT
NCAPD2	9918	ENSG00000010292	chr12	0.590523	8.66978	12.8561	1.00288e-08	2.79044e-07	HeterovsWT		CCNE2	9134	ENSG00000175305	chr8	1.51153	4.68966	17.5173	2.28031e-10	5.89926e-09	HomovsWT
ANXA1	301	ENSG00000135046	chr9	-0.777024	5.39447	-12.8455	1.01281e-08	2.79594e-07	HeterovsWT		WDSUB1	151525	ENSG00000196151	chr2	-1.14729	5.88925	-17.7161	1.9823e-10	5.30237e-09	HomovsWT
CLU	1191	ENSG00000120885	chr8	0.72306	5.56873	12.8406	1.01749e-08	2.80315e-07	HeterovsWT		FAM193B	54540	ENSG00000146067	chr5	1.02024	6.38005	17.8159	1.84865e-10	5.05198e-09	HomovsWT
FAAH	2166	ENSG00000117480	chr1	1.22008	6.1991	12.8244	1.03303e-08	2.84021e-07	HeterovsWT		BTBD11	121551	ENSG00000151136	chr12	1.18854	4.97204	17.5856	2.17285e-10	5.69724e-09	HomovsWT
CYFIP2	26999	ENSG00000055163	chr5	-0.860339	5.5775	-12.7891	1.06783e-08	2.92996e-07	HeterovsWT		CASZ1	54897	ENSG00000130940	chr1	1.41918	4.85295	17.5284	2.26242e-10	5.87537e-09	HomovsWT
KIF17	57576	ENSG00000117245	chr1	-2.3241	0.672808	-12.7838	1.07311e-08	2.93851e-07	HeterovsWT		ZFP14	57677	ENSG00000142065	chr19	-5.1082	1.80149	-18.1841	1.43362e-10	4.1874e-09	HomovsWT
TCP11L2	255394	ENSG00000166046	chr12	-1.95808	1.54874	-12.7684	1.0888e-08	2.97088e-07	HeterovsWT		RALA	5898	ENSG00000006451	chr7	1.08973	6.49499	17.7731	1.90473e-10	5.18439e-09	HomovsWT
HSPA9	3313	ENSG00000113013	chr5	-0.512755	8.96627	-12.7679	1.08931e-08	2.97088e-07	HeterovsWT		OTOAP1	653786	ENSG00000257838	chr16	-3.01123	1.25167	-17.1455	2.97488e-10	7.2654e-09	HomovsWT
CHST7	56548	ENSG00000147119	chrX	-1.76969	1.92188	-12.7618	1.09559e-08	2.98201e-07	HeterovsWT		LINC01547	84536	ENSG00000183250	chr21	1.86888	3.08352	17.151	2.96315e-10	7.2654e-09	HomovsWT
TFR2	7036	ENSG00000106327	chr7	-1.13771	5.02502	-12.7572	1.10029e-08	2.98883e-07	HeterovsWT		POLE	5426	ENSG00000177084	chr12	0.852091	8.15289	17.8698	1.78067e-10	4.90568e-09	HomovsWT
MTCP1	4515	ENSG00000214827	chrX	-1.1346	4.16466	-12.7486	1.10931e-08	3.00733e-07	HeterovsWT		TLE2	7089	ENSG00000065717	chr19	-2.08741	2.61266	-17.1067	3.05966e-10	7.38122e-09	HomovsWT
PIK3AP1	118788	ENSG00000155629	chr10	0.493708	8.33654	12.7458	1.11223e-08	3.00921e-07	HeterovsWT		RPL39	6170	ENSG00000198918	chrX	-1.05522	8.74974	-17.8913	1.75416e-10	4.84247e-09	HomovsWT
ATP11C	286410	ENSG00000101974	chrX	-0.806998	6.6694	-12.7365	1.12203e-08	3.02371e-07	HeterovsWT		PHLPP1	23239	ENSG00000081913	chr18	0.918559	6.36055	17.6229	2.1164e-10	5.57072e-09	HomovsWT
GPNMB	10457	ENSG00000136235	chr7	-0.862142	7.68991	-12.737	1.12149e-08	3.02371e-07	HeterovsWT		NBPF9	400818	ENSG00000269713	chr1	-1.35995	4.30936	-17.2704	2.71901e-10	6.80103e-09	HomovsWT
SGK1	6446	ENSG00000118515	chr6	-1.47906	3.10397	-12.7296	1.12937e-08	3.03744e-07	HeterovsWT		HHAT	55733	ENSG00000054392	chr1	-1.53792	3.81997	-17.1438	2.97867e-10	7.2654e-09	HomovsWT
SAMD9	54809	ENSG00000205413	chr7	-1.01717	5.50136	-12.7241	1.13524e-08	3.04719e-07	HeterovsWT		NFKB2	4791	ENSG00000077150	chr10	-1.37632	5.81945	-17.546	2.23438e-10	5.81367e-09	HomovsWT
GDAP1L1	78997	ENSG00000124194	chr20	-1.26615	3.10131	-12.7127	1.14751e-08	3.07406e-07	HeterovsWT		RAB4A	5867	ENSG00000168118	chr1	-1.28789	5.65261	-17.471	2.35638e-10	6.04997e-09	HomovsWT
CACNA1C	775	ENSG00000151067	chr12	-1.24384	3.41582	-12.7014	1.15981e-08	3.1009e-07	HeterovsWT		VILL	50853	ENSG00000136059	chr3	-1.21599	5.51927	-17.4341	2.41899e-10	6.19591e-09	HomovsWT
TMEM248	55069	ENSG00000106609	chr7	-0.606197	7.84133	-12.6961	1.16558e-08	3.11019e-07	HeterovsWT		PRUNE2	158471	ENSG00000106772	chr9	-4.01837	0.822684	-17.8393	1.81885e-10	4.98056e-09	HomovsWT
IL1RAP	3556	ENSG00000196083	chr3	-1.23673	5.13653	-12.6587	1.20758e-08	3.21594e-07	HeterovsWT		ESPL1	9700	ENSG00000135476	chr12	1.11378	7.38241	17.731	1.96173e-10	5.29706e-09	HomovsWT
HEXB	3074	ENSG00000049860	chr5	-0.806349	7.76052	-12.6546	1.21228e-08	3.22215e-07	HeterovsWT		COX5A	9377	ENSG00000178741	chr15	-1.08145	6.21828	-17.5599	2.21265e-10	5.77928e-09	HomovsWT
PIK3IP1	113791	ENSG00000100100	chr22	-1.12867	3.83659	-12.6469	1.22115e-08	3.23308e-07	HeterovsWT		SEMA3G	56920	ENSG00000010319	chr3	-1.46476	4.50342	-17.1583	2.94754e-10	7.2654e-09	HomovsWT
AGTPBP1	23287	ENSG00000135049	chr9	-0.602986	7.72507	-12.6481	1.21981e-08	3.23308e-07	HeterovsWT		ATP5MC3	518	ENSG00000154518	chr2	-1.21261	8.03987	-17.7154	1.98322e-10	5.30237e-09	HomovsWT
ALDH1A2	8854	ENSG00000128918	chr15	-2.35737	1.39068	-12.6448	1.22363e-08	3.23333e-07	HeterovsWT		ARHGAP35	2909	ENSG00000160007	chr19	0.752214	8.2699	17.7425	1.94588e-10	5.26474e-09	HomovsWT
ACAP2	23527	ENSG00000114331	chr3	-0.654126	7.94061	-12.6317	1.23888e-08	3.26726e-07	HeterovsWT		CMPK2	129607	ENSG00000134326	chr2	-2.37009	2.61419	-16.9492	3.43074e-10	7.95159e-09	HomovsWT
PDE4B	5142	ENSG00000184588	chr1	-1.24811	4.83582	-12.6225	1.24979e-08	3.28967e-07	HeterovsWT		GPR176	11245	ENSG00000166073	chr15	-7.97819	-0.472545	-22.2308	1.1593e-11	7.22275e-10	HomovsWT
AK4	205	ENSG00000162433	chr1	0.826025	5.25537	12.6141	1.25975e-08	3.30948e-07	HeterovsWT		PRPS1	5631	ENSG00000147224	chrX	-0.791269	6.60138	-17.5689	2.19851e-10	5.7534e-09	HomovsWT
LINC01237	101927289	ENSG00000233806	chr2	1.24743	3.24055	12.5994	1.27759e-08	3.34985e-07	HeterovsWT		KCNG1	3755	ENSG00000026559	chr20	-8.56656	-1.40378	-21.9605	1.35217e-11	7.71648e-10	HomovsWT
NFKB1	4790	ENSG00000109320	chr4	-0.656892	6.23579	-12.5973	1.28006e-08	3.34987e-07	HeterovsWT		PJA1	64219	ENSG00000181191	chrX	-2.18476	2.94279	-16.893	3.57467e-10	8.24298e-09	HomovsWT
TIMM8A	1678	ENSG00000126953	chrX	-0.997451	4.71365	-12.5948	1.28318e-08	3.35157e-07	HeterovsWT		MAGED2	10916	ENSG00000102316	chrX	-1.3234	5.70169	-17.3328	2.60015e-10	6.53985e-09	HomovsWT
FMR1	2332	ENSG00000102081	chrX	-0.696155	6.15254	-12.5849	1.29536e-08	3.37689e-07	HeterovsWT		EPRS	NA	NA	chr1	-0.767435	9.22378	-17.6846	2.02649e-10	5.38625e-09	HomovsWT
TDRD3	81550	ENSG00000083544	chr13	-0.872438	5.55375	-12.5749	1.30774e-08	3.39613e-07	HeterovsWT		MYOF	26509	ENSG00000138119	chr10	-3.57625	1.29665	-17.0866	3.10434e-10	7.43619e-09	HomovsWT
IDH3G	3421	ENSG00000067829	chrX	-0.782967	5.6277	-12.5762	1.30612e-08	3.39613e-07	HeterovsWT		TFEC	22797	ENSG00000105967	chr7	-2.02444	4.59402	-17.0417	3.20727e-10	7.61365e-09	HomovsWT
SENP5	205564	ENSG00000119231	chr3	-0.603958	6.81355	-12.5696	1.31429e-08	3.40663e-07	HeterovsWT		IL1B	3553	ENSG00000125538	chr2	1.32537	3.96497	17.011	3.27955e-10	7.711e-09	HomovsWT
SENP2	59343	ENSG00000163904	chr3	0.754538	5.81432	12.5601	1.32626e-08	3.42458e-07	HeterovsWT		KIFC1	3833	ENSG00000204197	chr6	0.991481	7.4087	17.5476	2.23184e-10	5.81367e-09	HomovsWT
GAS7	8522	ENSG00000007237	chr17	-0.616595	8.65621	-12.5611	1.32496e-08	3.42458e-07	HeterovsWT		TRIM68	55128	ENSG00000167333	chr11	-7.77096	-0.893449	-21.9936	1.32682e-11	7.60375e-10	HomovsWT
MEF2D	4209	ENSG00000116604	chr1	0.654264	6.82017	12.5314	1.36314e-08	3.51311e-07	HeterovsWT		CHST7	56548	ENSG00000147119	chrX	-3.34753	1.92188	-16.9105	3.52907e-10	8.15167e-09	HomovsWT
RAPGEF4	11069	ENSG00000091428	chr2	-1.26621	2.71224	-12.523	1.37418e-08	3.53486e-07	HeterovsWT		APEX2	27301	ENSG00000169188	chrX	-0.945414	5.37433	-17.2438	2.77156e-10	6.90702e-09	HomovsWT
CCDC9B	388115	ENSG00000188549	chr15	-1.11671	3.85106	-12.5128	1.38755e-08	3.55579e-07	HeterovsWT		DAB1	1600	ENSG00000173406	chr1	-1.59543	4.38712	-16.9988	3.30876e-10	7.74821e-09	HomovsWT
CELSR3	1951	ENSG00000008300	chr3	1.01067	4.36136	12.5135	1.38665e-08	3.55579e-07	HeterovsWT		ARSD	414	ENSG00000006756	chrX	-1.77901	4.3051	-16.9655	3.39014e-10	7.87091e-09	HomovsWT
SIPA1L1	26037	ENSG00000197555	chr14	-0.669172	6.18241	-12.5026	1.40119e-08	3.58399e-07	HeterovsWT		PMS1	5378	ENSG00000064933	chr2	-1.01518	6.72583	-17.3674	2.53663e-10	6.40382e-09	HomovsWT
FAM111A	63901	ENSG00000166801	chr11	0.805332	7.42512	12.4832	1.42747e-08	3.64435e-07	HeterovsWT		ST6GALNAC3	256435	ENSG00000184005	chr1	-0.979427	7.88565	-17.5111	2.29032e-10	5.90268e-09	HomovsWT
RPL31	6160	ENSG00000071082	chr2	0.767138	8.21393	12.4316	1.50004e-08	3.82244e-07	HeterovsWT		IL12A-AS1	101928376	ENSG00000244040	chr3	0.797318	7.74711	17.5146	2.2847e-10	5.89939e-09	HomovsWT
ARL4C	10123	ENSG00000188042	chr2	-6.25552	-2.88186	-12.4098	1.53194e-08	3.8964e-07	HeterovsWT		CBWD2	150472	ENSG00000136682	chr2	-1.11524	6.56619	-17.33	2.60551e-10	6.54123e-09	HomovsWT
NFIB	4781	ENSG00000147862	chr9	3.60485	0.24786	12.4048	1.53929e-08	3.90048e-07	HeterovsWT		KDM5B	10765	ENSG00000117139	chr1	-0.719576	7.93049	-17.4295	2.42691e-10	6.19591e-09	HomovsWT
SCML1	6322	ENSG00000047634	chrX	-0.936372	4.06525	-12.4056	1.53804e-08	3.90048e-07	HeterovsWT		THOC2	57187	ENSG00000125676	chrX	-0.962938	7.31162	-17.3909	2.49456e-10	6.32184e-09	HomovsWT
VAV1	7409	ENSG00000141968	chr19	-0.618208	7.42206	-12.3939	1.55559e-08	3.93446e-07	HeterovsWT		DPY19L1P1	100129460	NA	chr7	1.1435	5.42404	17.1225	3.02481e-10	7.32316e-09	HomovsWT
RIPK2	8767	ENSG00000104312	chr8	-1.46039	1.39639	-12.3902	1.56119e-08	3.94129e-07	HeterovsWT		ANK2	287	ENSG00000145362	chr4	-1.77095	3.86693	-16.7714	3.9087e-10	8.8186e-09	HomovsWT
HADHA	3030	ENSG00000084754	chr2	0.525716	9.63315	12.3871	1.5658e-08	3.94558e-07	HeterovsWT		HSH2D	84941	ENSG00000196684	chr19	1.27864	5.60643	17.1433	2.97955e-10	7.2654e-09	HomovsWT
MIR29B2CHG	100128537	NA	chr1	0.740455	5.92122	12.3669	1.59665e-08	4.01588e-07	HeterovsWT		ALG13	79868	ENSG00000101901	chrX	-1.21995	5.31149	-17.0816	3.11566e-10	7.45016e-09	HomovsWT
C10orf91	NA	NA	chr10	2.58761	1.76341	12.3603	1.60692e-08	4.03423e-07	HeterovsWT		ADCY1	107	ENSG00000164742	chr7	0.92212	6.36137	17.2412	2.77664e-10	6.90702e-09	HomovsWT
DCAKD	79877	ENSG00000172992	chr17	1.04451	5.26717	12.3571	1.61182e-08	4.03906e-07	HeterovsWT		ANKRD13D	338692	ENSG00000172932	chr11	0.980225	6.37526	17.2356	2.78797e-10	6.92253e-09	HomovsWT
PTAR1	375743	ENSG00000188647	chr9	-0.803587	7.31248	-12.3392	1.64005e-08	4.10224e-07	HeterovsWT		ZNF136	7695	ENSG00000196646	chr19	1.69539	3.66576	16.7194	4.06169e-10	9.05844e-09	HomovsWT
TSC22D4	81628	ENSG00000166925	chr7	-0.818038	7.41683	-12.33	1.65476e-08	4.13142e-07	HeterovsWT		CUX2	23316	ENSG00000111249	chr12	-1.31572	3.75964	-16.7423	3.9934e-10	8.96708e-09	HomovsWT
AL139383.1	NA	NA	chr13	-2.40366	1.03147	-12.3214	1.66858e-08	4.15829e-07	HeterovsWT		SNX18	112574	ENSG00000178996	chr5	-0.903254	5.93973	-17.1321	3.00396e-10	7.28568e-09	HomovsWT
LINC02814	112267873	NA	chr1	-1.91781	2.28015	-12.3098	1.68751e-08	4.19008e-07	HeterovsWT		MAPKAPK3	7867	ENSG00000114738	chr3	0.818861	8.7064	17.3935	2.48985e-10	6.32184e-09	HomovsWT
MAML3	55534	ENSG00000196782	chr4	-0.703352	6.24035	-12.3108	1.68577e-08	4.19008e-07	HeterovsWT		TSGA10	80705	ENSG00000135951	chr2	-1.43358	4.41383	-16.7893	3.85743e-10	8.71741e-09	HomovsWT
RAP2C	57826	ENSG00000123728	chrX	-0.955558	5.38989	-12.3018	1.70053e-08	4.21472e-07	HeterovsWT		AGO2	27161	ENSG00000123908	chr8	-0.816822	7.99752	-17.3363	2.59374e-10	6.53583e-09	HomovsWT
FAM200A	221786	ENSG00000221909	chr7	-1.20068	2.95884	-12.2912	1.71813e-08	4.25036e-07	HeterovsWT		PTP4A3	11156	ENSG00000184489	chr8	1.6257	6.0154	17.0979	3.07912e-10	7.39199e-09	HomovsWT
FZD1	8321	ENSG00000157240	chr7	-0.823255	5.49396	-12.2894	1.72117e-08	4.25036e-07	HeterovsWT		SNN	8303	ENSG00000184602	chr16	1.07181	6.07754	17.1332	3.00148e-10	7.28568e-09	HomovsWT
RNF165	494470	ENSG00000141622	chr18	0.885604	4.91036	12.2782	1.74006e-08	4.28921e-07	HeterovsWT		SLC25A5	292	ENSG00000005022	chrX	-0.901013	8.72881	-17.3687	2.53433e-10	6.40382e-09	HomovsWT
NDFIP2	54602	ENSG00000102471	chr13	2.41412	1.15831	12.2757	1.74424e-08	4.29171e-07	HeterovsWT		KCND2	3751	ENSG00000184408	chr7	4.77874	1.58212	17.0758	3.12876e-10	7.45523e-09	HomovsWT
ST8SIA4	7903	ENSG00000113532	chr5	-0.830321	7.04776	-12.2714	1.75156e-08	4.30194e-07	HeterovsWT		CNIH3	149111	ENSG00000143786	chr1	-1.20738	4.89352	-16.8723	3.62938e-10	8.32672e-09	HomovsWT
DUSP4	1846	ENSG00000120875	chr8	-0.877924	5.8261	-12.2695	1.75485e-08	4.30222e-07	HeterovsWT		ITPRIP	85450	ENSG00000148841	chr10	0.889916	6.37978	17.1506	2.964e-10	7.2654e-09	HomovsWT
LINC00886	730091	ENSG00000240875	chr3	2.39068	1.58874	12.2648	1.76299e-08	4.30663e-07	HeterovsWT		DYNC2H1	79659	ENSG00000187240	chr11	-1.10629	5.35604	-16.9734	3.3707e-10	7.83919e-09	HomovsWT
RTTN	25914	ENSG00000176225	chr18	0.71223	6.71528	12.2664	1.76022e-08	4.30663e-07	HeterovsWT		STAT1	6772	ENSG00000115415	chr2	-0.732232	7.52348	-17.2454	2.76835e-10	6.90702e-09	HomovsWT
DBNDD1	79007	ENSG00000003249	chr16	1.73391	2.90271	12.256	1.77806e-08	4.33452e-07	HeterovsWT		CHM	1121	ENSG00000188419	chrX	-1.27603	5.49226	-16.996	3.31563e-10	7.75092e-09	HomovsWT
NKG7	4818	ENSG00000105374	chr19	-0.735779	6.77682	-12.2544	1.78079e-08	4.33452e-07	HeterovsWT		CXXC1	30827	ENSG00000154832	chr18	1.33049	6.57661	17.1075	3.05771e-10	7.38122e-09	HomovsWT
COL4A1	1282	ENSG00000187498	chr13	-2.74159	0.398316	-12.2418	1.80283e-08	4.38034e-07	HeterovsWT		CD69	969	ENSG00000110848	chr12	0.989958	6.47615	17.1325	3.00306e-10	7.28568e-09	HomovsWT
SFMBT1	51460	ENSG00000163935	chr3	0.779462	5.12999	12.225	1.8327e-08	4.44495e-07	HeterovsWT		AC103855.3	NA	NA	chr11	-2.83176	3.61402	-16.5084	4.75176e-10	1.02442e-08	HomovsWT
GJB2	2706	ENSG00000165474	chr13	-1.04313	3.99003	-12.2184	1.84459e-08	4.46581e-07	HeterovsWT		SHANK2	22941	ENSG00000162105	chr11	-5.62152	1.65466	-17.8561	1.79765e-10	4.93371e-09	HomovsWT
SRI	6717	ENSG00000075142	chr7	-0.725778	6.58821	-12.2158	1.84917e-08	4.46894e-07	HeterovsWT		MERTK	10461	ENSG00000153208	chr2	-1.38221	5.25414	-16.8429	3.70833e-10	8.45076e-09	HomovsWT
MCTS1	28985	ENSG00000288295	chrX	-1.16338	4.78471	-12.2085	1.86238e-08	4.49287e-07	HeterovsWT		SLC9A3R1	9368	ENSG00000109062	chr17	1.01491	7.1501	17.1829	2.8958e-10	7.15543e-09	HomovsWT
JAG1	182	ENSG00000101384	chr20	-1.29487	3.60771	-12.195	1.88725e-08	4.5448e-07	HeterovsWT		MTFMT	123263	ENSG00000103707	chr15	-1.16651	4.65272	-16.7475	3.97824e-10	8.9606e-09	HomovsWT
KANSL3	55683	ENSG00000114982	chr2	0.558645	7.0958	12.1863	1.90324e-08	4.57518e-07	HeterovsWT		PRKAR1B	5575	ENSG00000188191	chr7	1.39695	6.11387	17.0025	3.30001e-10	7.74105e-09	HomovsWT
C1GALT1C1	29071	ENSG00000171155	chrX	-0.930233	4.40292	-12.1766	1.92151e-08	4.61094e-07	HeterovsWT		PPP2R5A	5525	ENSG00000066027	chr1	-0.833166	6.81828	-17.0973	3.08045e-10	7.39199e-09	HomovsWT
CCDC69	26112	ENSG00000198624	chr5	-0.993641	4.68939	-12.1728	1.92873e-08	4.62012e-07	HeterovsWT		DSTN	11034	ENSG00000125868	chr20	-1.02843	6.0967	-16.9901	3.32996e-10	7.75771e-09	HomovsWT
PIGV	55650	ENSG00000060642	chr1	0.826744	4.75482	12.1698	1.93434e-08	4.62539e-07	HeterovsWT		TMC6	11322	ENSG00000141524	chr17	1.58088	7.09092	17.0983	3.07817e-10	7.39199e-09	HomovsWT
SMURF1	57154	ENSG00000198742	chr7	-0.939963	5.08635	-12.1656	1.94222e-08	4.63608e-07	HeterovsWT		EIF2S3	1968	ENSG00000130741	chrX	-0.899472	9.09172	-17.2282	2.80276e-10	6.94655e-09	HomovsWT
MBD1	4152	ENSG00000141644	chr18	0.753507	6.93196	12.1514	1.96951e-08	4.68474e-07	HeterovsWT		STX3	6809	ENSG00000166900	chr11	0.794758	7.04239	17.0763	3.12764e-10	7.45523e-09	HomovsWT
VPS13A	23230	ENSG00000197969	chr9	-0.699804	7.89827	-12.1524	1.96752e-08	4.68474e-07	HeterovsWT		GNAI2	2771	ENSG00000114353	chr3	0.874396	9.01516	17.182	2.89758e-10	7.15543e-09	HomovsWT
PVT1	5820	ENSG00000249859	chr8	0.534379	7.58631	12.1493	1.97363e-08	4.68633e-07	HeterovsWT		FAM120C	54954	ENSG00000184083	chrX	-1.00252	5.77429	-16.8638	3.65187e-10	8.35012e-09	HomovsWT
XIAP	331	ENSG00000101966	chrX	-0.817535	6.14736	-12.1436	1.98461e-08	4.70418e-07	HeterovsWT		STRIP2	57464	ENSG00000128578	chr7	-1.45156	5.13053	-16.7063	4.10105e-10	9.11628e-09	HomovsWT
TPK1	27010	ENSG00000196511	chr7	-0.876742	4.19945	-12.1213	2.0287e-08	4.79196e-07	HeterovsWT		SIPA1L3	23094	ENSG00000105738	chr19	0.858993	7.17692	17.0372	3.21767e-10	7.61365e-09	HomovsWT
GNA11	2767	ENSG00000088256	chr19	-6.13428	-1.79785	-12.1225	2.0262e-08	4.79196e-07	HeterovsWT		ARHGAP15	55843	ENSG00000075884	chr2	-1.32976	7.44839	-17.0233	3.25049e-10	7.66461e-09	HomovsWT
MEF2C-AS1	101929423	ENSG00000248309	chr5	-1.9584	1.68716	-12.119	2.03325e-08	4.79437e-07	HeterovsWT		RHEB	6009	ENSG00000106615	chr7	0.813113	7.03749	16.991	3.32778e-10	7.75771e-09	HomovsWT
RNF157	114804	ENSG00000141576	chr17	4.63094	-0.861286	12.1152	2.04092e-08	4.80411e-07	HeterovsWT		RELB	5971	ENSG00000104856	chr19	-1.74199	3.44742	-16.3825	5.22238e-10	1.11002e-08	HomovsWT
RRM2	6241	ENSG00000171848	chr2	0.462673	9.3125	12.1117	2.04783e-08	4.81206e-07	HeterovsWT		ZSCAN25	221785	ENSG00000197037	chr7	-0.907295	5.33888	-16.7341	4.01762e-10	8.97489e-09	HomovsWT
TBC1D30	23329	ENSG00000111490	chr12	1.77623	2.38904	12.1092	2.05301e-08	4.81589e-07	HeterovsWT		DST	667	ENSG00000151914	chr6	-1.15934	6.28746	-16.8306	3.74203e-10	8.51327e-09	HomovsWT
NAA40	79829	ENSG00000110583	chr11	0.902944	5.24581	12.1052	2.06108e-08	4.82649e-07	HeterovsWT		TSEN15	116461	ENSG00000198860	chr1	-1.00749	6.52152	-16.8593	3.66415e-10	8.36411e-09	HomovsWT
SLC25A40	55972	ENSG00000075303	chr7	-0.754797	7.34702	-12.0976	2.07655e-08	4.85433e-07	HeterovsWT		C5	727	ENSG00000106804	chr9	-1.37666	4.31659	-16.4151	5.09585e-10	1.08824e-08	HomovsWT
OPLAH	26873	ENSG00000178814	chr8	-1.12374	3.75968	-12.0914	2.08917e-08	4.87544e-07	HeterovsWT		KITLG	4254	ENSG00000049130	chr12	8.61811	-0.721949	20.2603	3.71796e-11	1.58299e-09	HomovsWT
HINT1	3094	ENSG00000169567	chr5	-0.677089	5.59685	-12.0775	2.11799e-08	4.93424e-07	HeterovsWT		ATP9A	10079	ENSG00000054793	chr20	-8.82011	3.04776	-17.6265	2.111e-10	5.56729e-09	HomovsWT
MAP7D3	79649	ENSG00000129680	chrX	-0.872325	5.59325	-12.0752	2.12279e-08	4.93693e-07	HeterovsWT		ZNF827	152485	ENSG00000151612	chr4	4.59503	1.80959	16.6706	4.21119e-10	9.33057e-09	HomovsWT
AC006538.2	NA	NA	chr19	-1.33124	3.5092	-12.0728	2.12794e-08	4.94047e-07	HeterovsWT		KIF15	56992	ENSG00000163808	chr3	0.799165	7.62284	16.9376	3.45979e-10	8.00526e-09	HomovsWT
SMYD3	64754	ENSG00000185420	chr1	-0.502582	7.67063	-12.0681	2.1378e-08	4.95488e-07	HeterovsWT		FCMR	9214	ENSG00000162894	chr1	-2.41996	2.04763	-16.1454	6.25117e-10	1.28253e-08	HomovsWT
WNT3	7473	ENSG00000277641	chr17	5.52105	-0.796782	12.0519	2.17232e-08	5.0263e-07	HeterovsWT		TENT5A	55603	ENSG00000112773	chr6	-0.903363	7.02886	-16.8232	3.76242e-10	8.54536e-09	HomovsWT
HOMER3	9454	ENSG00000051128	chr19	-0.953936	5.48353	-12.0285	2.22308e-08	5.13502e-07	HeterovsWT		LRRC3	81543	ENSG00000160233	chr21	-1.59002	4.15397	-16.3231	5.46197e-10	1.14482e-08	HomovsWT
ENC1	8507	ENSG00000171617	chr5	-0.850678	4.58277	-12.0181	2.24608e-08	5.17932e-07	HeterovsWT		NRSN2-AS1	100507459	ENSG00000225377	chr20	-1.56338	4.42799	-16.3605	5.31e-10	1.12302e-08	HomovsWT
SKP2	6502	ENSG00000145604	chr5	0.589148	7.38723	12.0065	2.27203e-08	5.23029e-07	HeterovsWT		C8B	732	ENSG00000021852	chr1	-8.71664	-0.959637	-19.9716	4.44961e-11	1.80942e-09	HomovsWT
PARPBP	55010	ENSG00000185480	chr12	-0.672649	5.68886	-12.0009	2.28479e-08	5.25076e-07	HeterovsWT		LINC01237	101927289	ENSG00000233806	chr2	-3.65492	3.24055	-16.1065	6.43957e-10	1.31368e-08	HomovsWT
ABCA13	154664	ENSG00000179869	chr7	-1.06203	3.59774	-11.9733	2.34826e-08	5.38226e-07	HeterovsWT		NUDT19	390916	ENSG00000213965	chr19	-0.85467	6.47288	-16.6919	4.14523e-10	9.19943e-09	HomovsWT
CIAO1	9391	ENSG00000144021	chr2	0.674052	6.6243	11.9726	2.34993e-08	5.38226e-07	HeterovsWT		LPAL2	80350	ENSG00000213071	chr6	-4.37093	0.78045	-16.8662	3.64554e-10	8.3497e-09	HomovsWT
AC245187.2	NA	NA	chr8	-5.00581	-1.49682	-11.9592	2.38147e-08	5.42703e-07	HeterovsWT		IGF2BP2	10644	ENSG00000073792	chr3	1.17626	5.31479	16.4913	4.81283e-10	1.03594e-08	HomovsWT
GRIP1	23426	ENSG00000155974	chr12	-1.09443	2.8079	-11.9608	2.37759e-08	5.42703e-07	HeterovsWT		FOCAD	54914	ENSG00000188352	chr9	-0.714609	6.98718	-16.742	3.99432e-10	8.96708e-09	HomovsWT
SSR4	6748	ENSG00000180879	chrX	-1.05525	6.78689	-11.9612	2.37663e-08	5.42703e-07	HeterovsWT		ZNF613	79898	ENSG00000176024	chr19	-7.26667	-1.41318	-20.3071	3.61208e-11	1.55744e-09	HomovsWT
TRMT11	60487	ENSG00000066651	chr6	-0.691596	5.78019	-11.9411	2.42468e-08	5.51626e-07	HeterovsWT		GTSE1	51512	ENSG00000075218	chr22	0.948761	5.56904	16.523	4.70017e-10	1.01671e-08	HomovsWT
DMC1	11144	ENSG00000100206	chr22	1.30581	3.49982	11.9292	2.45362e-08	5.54847e-07	HeterovsWT		PTTG1IP	754	ENSG00000183255	chr21	0.719871	8.09758	16.8199	3.77154e-10	8.55175e-09	HomovsWT
USP44	84101	ENSG00000136014	chr12	1.14216	4.5661	11.9301	2.45143e-08	5.54847e-07	HeterovsWT		SLFN13	146857	ENSG00000154760	chr17	1.14315	6.32085	16.6151	4.38809e-10	9.70669e-09	HomovsWT
FBN1	2200	ENSG00000166147	chr15	-0.819873	4.6187	-11.9291	2.45394e-08	5.54847e-07	HeterovsWT		PPM1M	132160	ENSG00000164088	chr3	-1.54151	4.50877	-16.275	5.66428e-10	1.18175e-08	HomovsWT
PAG1	55824	ENSG00000076641	chr8	-0.641817	6.87115	-11.9286	2.45518e-08	5.54847e-07	HeterovsWT		SLC49A3	84179	ENSG00000169026	chr4	-2.39271	1.90434	-16.0559	6.69428e-10	1.353e-08	HomovsWT
ZNF536	9745	ENSG00000198597	chr19	-0.688359	6.32682	-11.9102	2.50055e-08	5.6416e-07	HeterovsWT		ZEB1	6935	ENSG00000148516	chr10	7.4413	1.79523	17.7194	1.97765e-10	5.30237e-09	HomovsWT
ZFHX3	463	ENSG00000140836	chr16	-0.995508	4.78265	-11.8753	2.58937e-08	5.83231e-07	HeterovsWT		CDK14	5218	ENSG00000058091	chr7	-1.10606	7.40578	-16.7386	4.00444e-10	8.97222e-09	HomovsWT
LHX6	26468	ENSG00000106852	chr9	4.32804	-0.0631508	11.8629	2.62173e-08	5.89542e-07	HeterovsWT		GPC5	2262	ENSG00000179399	chr13	3.57359	2.1925	16.4058	5.13169e-10	1.0939e-08	HomovsWT
LINC01399	104310353	ENSG00000233080	chr22	-5.02363	-1.65919	-11.8577	2.63524e-08	5.916e-07	HeterovsWT		SLC26A9	115019	ENSG00000174502	chr1	-0.746923	7.77359	-16.7368	4.00982e-10	8.97222e-09	HomovsWT
TSC22D3	1831	ENSG00000157514	chrX	-1.05618	5.26122	-11.8531	2.6474e-08	5.93349e-07	HeterovsWT		TBL2	26608	ENSG00000106638	chr7	-1.07598	6.11986	-16.5429	4.63062e-10	1.01035e-08	HomovsWT
HMMR	3161	ENSG00000072571	chr5	0.756078	5.50412	11.8495	2.65702e-08	5.94524e-07	HeterovsWT		GTF3C3	9330	ENSG00000119041	chr2	-1.08499	6.73423	-16.5787	4.50862e-10	9.86088e-09	HomovsWT
ARHGAP31	57514	ENSG00000031081	chr3	-0.972889	4.30224	-11.8339	2.69888e-08	6.01941e-07	HeterovsWT		NAA40	79829	ENSG00000110583	chr11	1.19447	5.24581	16.338	5.4009e-10	1.13553e-08	HomovsWT
AP005482.1	NA	NA	chr18	5.06721	-2.22523	11.8339	2.69903e-08	6.01941e-07	HeterovsWT		PRPS2	5634	ENSG00000101911	chrX	-1.00301	6.38415	-16.5296	4.67697e-10	1.01474e-08	HomovsWT
SIGLEC12	89858	ENSG00000254521	chr19	-0.689918	6.05714	-11.8197	2.73788e-08	6.09605e-07	HeterovsWT		APOO	79135	ENSG00000184831	chrX	-1.21263	3.79401	-16.0925	6.50884e-10	1.32538e-08	HomovsWT
IL12RB1	3594	ENSG00000096996	chr19	-2.19483	1.29254	-11.7724	2.8713e-08	6.38265e-07	HeterovsWT		JPT2	90861	ENSG00000206053	chr16	0.852859	7.19691	16.6069	4.4151e-10	9.73472e-09	HomovsWT
CTH	1491	ENSG00000116761	chr1	-0.625585	5.36977	-11.7704	2.87704e-08	6.38495e-07	HeterovsWT		RAB9A	9367	ENSG00000123595	chrX	-1.26023	4.35715	-16.1478	6.23962e-10	1.2821e-08	HomovsWT
FKBP10	60681	ENSG00000141756	chr17	4.00302	-0.48266	11.7666	2.88813e-08	6.3887e-07	HeterovsWT		CFAP61	26074	ENSG00000089101	chr20	-5.30694	0.623918	-17.3907	2.49485e-10	6.32184e-09	HomovsWT
NSD1	64324	ENSG00000165671	chr5	0.51067	7.65668	11.7676	2.885e-08	6.3887e-07	HeterovsWT		MSI2	124540	ENSG00000153944	chr17	0.859805	7.56284	16.5988	4.44168e-10	9.74586e-09	HomovsWT
TENT5C	54855	ENSG00000183508	chr1	0.544871	7.96355	11.7605	2.90593e-08	6.41762e-07	HeterovsWT		CALM1	801	ENSG00000198668	chr14	0.720736	7.20943	16.5842	4.49031e-10	9.83667e-09	HomovsWT
TMEM222	84065	ENSG00000186501	chr1	0.696263	5.59672	11.7502	2.93612e-08	6.47377e-07	HeterovsWT		OLFML2B	25903	ENSG00000162745	chr1	-3.85548	0.733646	-16.4575	4.93633e-10	1.0575e-08	HomovsWT
AC112206.2	NA	NA	chr5	-3.71527	-1.71521	-11.7473	2.94484e-08	6.47576e-07	HeterovsWT		HERC1	8925	ENSG00000103657	chr15	-0.7185	7.7701	-16.6105	4.40324e-10	9.72436e-09	HomovsWT
FTSJ1	24140	ENSG00000068438	chrX	-0.7357	6.11442	-11.7467	2.94656e-08	6.47576e-07	HeterovsWT		KIAA1217	56243	ENSG00000120549	chr10	-3.96809	1.85047	-15.9309	7.37073e-10	1.46104e-08	HomovsWT
GVINP1	387751	ENSG00000254838	chr11	-1.39722	3.52356	-11.7388	2.97018e-08	6.51713e-07	HeterovsWT		ZDHHC14	79683	ENSG00000175048	chr6	-0.909023	7.01408	-16.5342	4.66101e-10	1.01289e-08	HomovsWT
COG4	25839	ENSG00000103051	chr16	0.703652	5.29816	11.7287	3.00059e-08	6.57323e-07	HeterovsWT		APOOL	139322	ENSG00000155008	chrX	-0.933492	5.65418	-16.3717	5.26504e-10	1.1156e-08	HomovsWT
KCNN2	3781	ENSG00000080709	chr5	-0.771601	4.37256	-11.7182	3.03264e-08	6.63274e-07	HeterovsWT		GPAT3	84803	ENSG00000138678	chr4	1.50645	4.12885	16.0634	6.65584e-10	1.34925e-08	HomovsWT
TMEM158	25907	ENSG00000249992	chr3	-0.976584	4.53999	-11.7018	3.08367e-08	6.7335e-07	HeterovsWT		MNDA	4332	ENSG00000163563	chr1	-2.0412	6.57039	-16.419	5.0812e-10	1.08682e-08	HomovsWT
STOX2	56977	ENSG00000173320	chr4	-0.844776	3.72364	-11.6972	3.09804e-08	6.75402e-07	HeterovsWT		AC093459.1	NA	NA	chr2	2.88767	2.92726	15.9009	7.54327e-10	1.47626e-08	HomovsWT
DYSF	8291	ENSG00000135636	chr2	-0.544908	6.52146	-11.6881	3.12662e-08	6.8054e-07	HeterovsWT		ZNF367	195828	ENSG00000165244	chr9	0.95022	5.99293	16.3732	5.25923e-10	1.1156e-08	HomovsWT
POM121C	100101267	ENSG00000272391	chr7	-0.627194	7.43245	-11.6631	3.20693e-08	6.96904e-07	HeterovsWT		MAGED1	9500	ENSG00000179222	chrX	10.3253	2.54426	19.1616	7.46581e-11	2.59337e-09	HomovsWT
EML1	2009	ENSG00000066629	chr14	-2.62075	0.612983	-11.6533	3.23914e-08	7.01658e-07	HeterovsWT		PSMA4	5685	ENSG00000041357	chr15	-0.961635	7.43324	-16.5418	4.63443e-10	1.01035e-08	HomovsWT
MAGT1	84061	ENSG00000102158	chrX	-0.68143	6.64424	-11.6542	3.2363e-08	7.01658e-07	HeterovsWT		SEC24D	9871	ENSG00000150961	chr4	-1.30021	7.0295	-16.4605	4.92527e-10	1.05723e-08	HomovsWT
AL365361.1	NA	NA	chr1	1.42019	3.55094	11.6507	3.2476e-08	7.02371e-07	HeterovsWT		NONO	4841	ENSG00000147140	chrX	-0.638304	8.80463	-16.601	4.43456e-10	9.74586e-09	HomovsWT
TREML2	79865	ENSG00000112195	chr6	-1.81982	2.43811	-11.6409	3.28025e-08	7.08305e-07	HeterovsWT		SPG21	51324	ENSG00000090487	chr15	-0.787613	7.69131	-16.5162	4.72384e-10	1.02002e-08	HomovsWT
AC138150.1	NA	NA	chr17	1.58808	2.56447	11.6294	3.31891e-08	7.15514e-07	HeterovsWT		CIR1	9541	ENSG00000138433	chr2	-1.30509	4.31965	-15.9817	7.08743e-10	1.41353e-08	HomovsWT
NUCKS1	64710	ENSG00000069275	chr1	0.597866	9.93556	11.5954	3.43581e-08	7.39543e-07	HeterovsWT		DNAJC12	56521	ENSG00000108176	chr10	-7.94762	-1.17951	-19.4046	6.37854e-11	2.31941e-09	HomovsWT
MDH2	4191	ENSG00000146701	chr7	-0.744765	8.25516	-11.5809	3.48712e-08	7.49399e-07	HeterovsWT		NAV1	89796	ENSG00000134369	chr1	-1.4777	3.41223	-15.8488	7.85411e-10	1.52829e-08	HomovsWT
IFNGR1	3459	ENSG00000027697	chr6	-0.64017	5.78246	-11.5737	3.51293e-08	7.53754e-07	HeterovsWT		PALD1	27143	ENSG00000107719	chr10	1.13914	5.50369	16.2289	5.86608e-10	1.21824e-08	HomovsWT
AP4E1	23431	ENSG00000081014	chr15	-0.582657	6.20699	-11.5663	3.53952e-08	7.58262e-07	HeterovsWT		FGR	2268	ENSG00000000938	chr1	0.882651	4.95536	16.201	5.99192e-10	1.23681e-08	HomovsWT
MAP4K1	11184	ENSG00000282928	chr19	0.778281	4.36745	11.5516	3.59316e-08	7.6854e-07	HeterovsWT		OR52K3P	390035	NA	chr11	-2.12323	2.19603	-15.7203	8.68169e-10	1.64809e-08	HomovsWT
NHSL2	340527	ENSG00000204131	chrX	-1.11278	6.89339	-11.5372	3.64668e-08	7.78761e-07	HeterovsWT		OTUD7A	161725	ENSG00000169918	chr15	-2.76209	2.69067	-15.7193	8.68819e-10	1.64809e-08	HomovsWT
GOLGA7B	401647	ENSG00000155265	chr10	-1.55684	2.54223	-11.5299	3.674e-08	7.8268e-07	HeterovsWT		ABLIM1	3983	ENSG00000099204	chr10	1.24082	5.95776	16.302	5.54977e-10	1.15965e-08	HomovsWT
BCL2	596	ENSG00000171791	chr18	0.558397	7.67037	11.5293	3.67656e-08	7.8268e-07	HeterovsWT		CHI3L1	1116	ENSG00000133048	chr1	-3.10535	2.21516	-15.9094	7.49384e-10	1.47296e-08	HomovsWT
AC009303.2	NA	NA	chr2	1.57654	0.690764	11.4976	3.79817e-08	8.07304e-07	HeterovsWT		ECM1	1893	ENSG00000143369	chr1	-4.8418	2.61711	-15.9253	7.40216e-10	1.46128e-08	HomovsWT
PARP1	142	ENSG00000143799	chr1	0.47703	8.90624	11.495	3.8084e-08	8.08213e-07	HeterovsWT		MACF1	23499	ENSG00000127603	chr1	0.635439	9.06484	16.5227	4.70104e-10	1.01671e-08	HomovsWT
NSD2	7468	ENSG00000109685	chr4	0.447649	9.54155	11.4818	3.86035e-08	8.17962e-07	HeterovsWT		ZDHHC11	79844	ENSG00000188818	chr5	-5.59705	0.832011	-16.874	3.62484e-10	8.32672e-09	HomovsWT
APBA2	321	ENSG00000034053	chr15	0.668831	5.78371	11.4637	3.93297e-08	8.3205e-07	HeterovsWT		SUGCT	79783	ENSG00000175600	chr7	-1.41413	4.24085	-15.8388	7.91566e-10	1.53367e-08	HomovsWT
TRIM56	81844	ENSG00000169871	chr7	-0.793006	7.37743	-11.4617	3.94108e-08	8.32209e-07	HeterovsWT		GK	2710	ENSG00000198814	chrX	-1.34412	4.8916	-16.031	6.82321e-10	1.37293e-08	HomovsWT
ATP13A3	79572	ENSG00000133657	chr3	-0.545126	8.43267	-11.4605	3.94598e-08	8.32209e-07	HeterovsWT		NRXN3	9369	ENSG00000021645	chr14	-9.72261	2.68006	-18.8351	9.25067e-11	2.98617e-09	HomovsWT
CLIC2	1193	ENSG00000155962	chrX	-1.3969	1.98681	-11.4566	3.96194e-08	8.34279e-07	HeterovsWT		SELENOI	85465	ENSG00000138018	chr2	0.777856	7.61545	16.404	5.1385e-10	1.0939e-08	HomovsWT
AL390879.1	NA	NA	chrX	-0.877259	3.72175	-11.4546	3.97002e-08	8.34688e-07	HeterovsWT		SMC1B	27127	ENSG00000077935	chr22	1.65331	3.42825	15.635	9.282e-10	1.72376e-08	HomovsWT
DDB2	1643	ENSG00000134574	chr11	0.610189	5.87282	11.4489	3.99357e-08	8.37047e-07	HeterovsWT		PPP4R1L	55370	NA	chr20	-1.99741	2.36718	-15.6045	9.5069e-10	1.752e-08	HomovsWT
NFKB2	4791	ENSG00000077150	chr10	-0.852994	5.81945	-11.4499	3.98917e-08	8.37047e-07	HeterovsWT		LINC01138	388685	ENSG00000274020	chr1	-1.60426	3.61477	-15.7404	8.54598e-10	1.62565e-08	HomovsWT
PGPEP1	54858	ENSG00000130517	chr19	-0.726937	7.04446	-11.4272	4.08373e-08	8.54625e-07	HeterovsWT		PIM2	11040	ENSG00000102096	chrX	-1.21657	4.39129	-15.9016	7.53939e-10	1.47626e-08	HomovsWT
TAF6	6878	ENSG00000106290	chr7	-0.676932	5.8577	-11.4215	4.10792e-08	8.58365e-07	HeterovsWT		ADRB2	154	ENSG00000169252	chr5	-1.06696	4.90888	-15.9931	7.02518e-10	1.40318e-08	HomovsWT
EFR3B	22979	ENSG00000084710	chr2	-1.03388	3.24767	-11.4184	4.12108e-08	8.59793e-07	HeterovsWT		CNDP2	55748	ENSG00000133313	chr18	0.691402	7.57456	16.3568	5.32487e-10	1.12302e-08	HomovsWT
LPAL2	80350	ENSG00000213071	chr6	-1.72186	0.78045	-11.4147	4.13686e-08	8.6176e-07	HeterovsWT		C21orf58	54058	ENSG00000160298	chr21	0.865025	7.21379	16.3308	5.43019e-10	1.13992e-08	HomovsWT
PYROXD2	84795	ENSG00000119943	chr10	-0.851336	4.13573	-11.4101	4.15683e-08	8.64596e-07	HeterovsWT		VLDLR-AS1	401491	ENSG00000236404	chr9	-1.0045	5.24866	-16.0588	6.67927e-10	1.35198e-08	HomovsWT
EMD	2010	ENSG00000102119	chrX	-0.831059	4.83035	-11.396	4.21768e-08	8.7591e-07	HeterovsWT		ST6GALNAC4	27090	ENSG00000136840	chr9	-1.35541	4.19348	-15.8205	8.02866e-10	1.54894e-08	HomovsWT
AHDC1	27245	ENSG00000126705	chr1	0.809224	5.85653	11.3945	4.22425e-08	8.75936e-07	HeterovsWT		DIRAS1	148252	ENSG00000176490	chr19	-5.80141	-0.0774434	-16.7088	4.09358e-10	9.11458e-09	HomovsWT
IFFO2	126917	ENSG00000169991	chr1	-0.755917	4.64358	-11.3869	4.25797e-08	8.8024e-07	HeterovsWT		SPEN	23013	ENSG00000065526	chr1	0.707235	7.98871	16.358	5.31993e-10	1.12302e-08	HomovsWT
INCENP	3619	ENSG00000149503	chr11	0.548695	7.26477	11.3879	4.2534e-08	8.8024e-07	HeterovsWT		USP42	84132	ENSG00000106346	chr7	0.98868	5.54982	16.0766	6.58882e-10	1.33966e-08	HomovsWT
SLCO4C1	353189	ENSG00000173930	chr5	1.04264	5.26873	11.3799	4.28895e-08	8.85296e-07	HeterovsWT		AL360015.1	NA	NA	chr6	-7.51484	-3.33189	-19.1079	7.73197e-11	2.64523e-09	HomovsWT
PCED1A	64773	ENSG00000132635	chr20	0.636846	6.28654	11.3679	4.34277e-08	8.95046e-07	HeterovsWT		FRMD4A	55691	ENSG00000151474	chr10	-4.4964	0.756364	-16.3072	5.52797e-10	1.15687e-08	HomovsWT
LRRC6	NA	NA	chr8	2.19141	1.25183	11.3532	4.40915e-08	9.03323e-07	HeterovsWT		ASRGL1	80150	ENSG00000162174	chr11	1.51324	3.58586	15.6653	9.06396e-10	1.69802e-08	HomovsWT
CENPO	79172	ENSG00000138092	chr2	0.643181	5.82078	11.3532	4.40953e-08	9.03323e-07	HeterovsWT		LINC02623	101929445	ENSG00000234944	chr10	-6.99022	-1.32231	-19.2373	7.10714e-11	2.50076e-09	HomovsWT
NANP	140838	ENSG00000170191	chr20	-0.72279	5.33537	-11.3558	4.39745e-08	9.03323e-07	HeterovsWT		TMEM18	129787	ENSG00000151353	chr2	0.960022	5.40609	16.0086	6.94207e-10	1.39067e-08	HomovsWT
TGFBR1	7046	ENSG00000106799	chr9	-0.470161	9.28525	-11.3563	4.39508e-08	9.03323e-07	HeterovsWT		ZNF470	388566	ENSG00000197016	chr19	4.5476	0.916248	16.2259	5.87919e-10	1.2191e-08	HomovsWT
ALDH3A2	224	ENSG00000072210	chr17	2.23789	-1.06564	11.349	4.42849e-08	9.05839e-07	HeterovsWT		SNUPN	10073	ENSG00000169371	chr15	-1.22273	4.89676	-15.8584	7.79586e-10	1.51913e-08	HomovsWT
GLMP	112770	ENSG00000198715	chr1	0.924044	3.34465	11.3422	4.46009e-08	9.1093e-07	HeterovsWT		LINC01388	101929179	NA	chr9	-1.91013	3.27325	-15.5545	9.88932e-10	1.81755e-08	HomovsWT
TPM4	7171	ENSG00000167460	chr19	-0.538639	7.50857	-11.3296	4.51878e-08	9.21533e-07	HeterovsWT		COX7B	1349	ENSG00000131174	chrX	-1.29022	6.09809	-16.1061	6.44171e-10	1.31368e-08	HomovsWT
KIFC1	3833	ENSG00000204197	chr6	0.645981	7.4087	11.3166	4.58035e-08	9.32688e-07	HeterovsWT		STMN1	3925	ENSG00000117632	chr1	0.733575	9.52398	16.3464	5.36667e-10	1.13008e-08	HomovsWT
AFF3	3899	ENSG00000144218	chr2	4.67752	-1.11944	11.2856	4.73122e-08	9.61968e-07	HeterovsWT		RBM38	55544	ENSG00000132819	chr20	0.993674	7.20181	16.218	5.91477e-10	1.22461e-08	HomovsWT
ZNF77	58492	ENSG00000175691	chr19	-4.3217	-1.11212	-11.2817	4.75012e-08	9.62044e-07	HeterovsWT		SOX4	6659	ENSG00000124766	chr6	1.08145	6.53561	16.13	6.32506e-10	1.29378e-08	HomovsWT
ATP2B3	492	ENSG00000067842	chrX	-0.967266	4.74073	-11.2804	4.75663e-08	9.62044e-07	HeterovsWT		SUSD1	64420	ENSG00000106868	chr9	1.52376	3.9128	15.6094	9.47079e-10	1.74772e-08	HomovsWT
STAG3L4	64940	ENSG00000106610	chr7	-0.749418	5.3349	-11.2833	4.74221e-08	9.62044e-07	HeterovsWT		CPS1	1373	ENSG00000021826	chr2	-1.13138	5.51719	-15.9164	7.45331e-10	1.46711e-08	HomovsWT
ERGIC3	51614	ENSG00000125991	chr20	0.553804	7.60716	11.2798	4.75993e-08	9.62044e-07	HeterovsWT		ZC3H15	55854	ENSG00000065548	chr2	-1.01787	6.98813	-16.1304	6.32302e-10	1.29378e-08	HomovsWT
SNX12	29934	ENSG00000147164	chrX	-0.679205	5.99841	-11.2763	4.77708e-08	9.64077e-07	HeterovsWT		PDE3B	5140	ENSG00000152270	chr11	-1.02746	5.04952	-15.8232	8.01237e-10	1.54894e-08	HomovsWT
HAAO	23498	ENSG00000162882	chr2	0.828233	3.96236	11.2685	4.81654e-08	9.70597e-07	HeterovsWT		AC245100.3	NA	NA	chr1	-3.70717	1.29754	-15.6935	8.86556e-10	1.67007e-08	HomovsWT
CXorf40A	NA	NA	chrX	-0.964709	3.74043	-11.2572	4.87342e-08	9.80604e-07	HeterovsWT		ASAH1	427	ENSG00000104763	chr8	-0.759577	8.36459	-16.2371	5.82943e-10	1.21249e-08	HomovsWT
WWP1	11059	ENSG00000123124	chr8	-1.36077	2.44746	-11.25	4.91048e-08	9.86601e-07	HeterovsWT		MPRIP	23164	ENSG00000133030	chr17	0.924393	7.71857	16.1746	6.11341e-10	1.25997e-08	HomovsWT
NFATC2	4773	ENSG00000101096	chr20	0.562125	6.62887	11.2438	4.94233e-08	9.91533e-07	HeterovsWT		SDCCAG8	10806	ENSG00000054282	chr1	-1.07775	5.5922	-15.8964	7.56989e-10	1.47934e-08	HomovsWT
PROS1	5627	ENSG00000184500	chr3	-1.07337	3.06145	-11.2347	4.99003e-08	9.99625e-07	HeterovsWT		ACOT9	23597	ENSG00000123130	chrX	-1.12604	4.94608	-15.7953	8.18777e-10	1.57516e-08	HomovsWT
SMAP1	60682	ENSG00000112305	chr6	-0.775652	4.74969	-11.2288	5.02065e-08	1.00428e-06	HeterovsWT		HIST1H2BI	NA	NA	chr6	-8.85015	2.47086	-17.0308	3.23275e-10	7.63603e-09	HomovsWT
DSTN	11034	ENSG00000125868	chr20	-0.657258	6.0967	-11.2141	5.09885e-08	1.01842e-06	HeterovsWT		AL138720.1	NA	NA	chr6	-1.14205	5.55605	-15.8392	7.91324e-10	1.53367e-08	HomovsWT
LRRK1	79705	ENSG00000154237	chr15	-0.763967	4.80143	-11.2111	5.11507e-08	1.02016e-06	HeterovsWT		MYB	4602	ENSG00000118513	chr6	-0.78587	9.24579	-16.2022	5.98635e-10	1.23681e-08	HomovsWT
PILRA	29992	ENSG00000085514	chr7	-1.21162	3.11832	-11.2007	5.17104e-08	1.02981e-06	HeterovsWT		SLCO3A1	28232	ENSG00000176463	chr15	0.85105	6.69638	16.0338	6.80891e-10	1.37209e-08	HomovsWT
EIF4H	7458	ENSG00000106682	chr7	-0.615179	9.34014	-11.1976	5.18789e-08	1.03165e-06	HeterovsWT		SMAD4	4089	ENSG00000141646	chr18	0.960418	6.70606	16.0043	6.96516e-10	1.39324e-08	HomovsWT
AC027559.1	NA	NA	chr15	2.6781	0.3586	11.195	5.20222e-08	1.03299e-06	HeterovsWT		AL162595.1	NA	NA	chr1	-1.55707	3.88331	-15.4407	1.08229e-09	1.93612e-08	HomovsWT
RFK	55312	ENSG00000135002	chr9	-0.917098	5.29964	-11.1919	5.21923e-08	1.03486e-06	HeterovsWT		GAPT	202309	ENSG00000175857	chr5	1.60976	5.49628	15.821	8.02586e-10	1.54894e-08	HomovsWT
SLC10A3	8273	ENSG00000126903	chrX	-0.95152	4.19726	-11.1786	5.29272e-08	1.0479e-06	HeterovsWT		DLK1	8788	ENSG00000185559	chr14	1.70763	4.5227	15.6543	9.14224e-10	1.70798e-08	HomovsWT
KCNK5	8645	ENSG00000164626	chr6	0.568757	6.59422	11.1749	5.31344e-08	1.05047e-06	HeterovsWT		IFNAR1	3454	ENSG00000142166	chr21	0.819554	6.91215	16.0265	6.84698e-10	1.37568e-08	HomovsWT
TMEM117	84216	ENSG00000139173	chr12	-0.894013	4.0501	-11.1668	5.35857e-08	1.05785e-06	HeterovsWT		TGFBR2	7048	ENSG00000163513	chr3	0.99236	7.21721	16.0212	6.87482e-10	1.37923e-08	HomovsWT
CD101	9398	ENSG00000134256	chr1	-1.66727	2.10355	-11.1482	5.46511e-08	1.07732e-06	HeterovsWT		SEMA4C	54910	ENSG00000168758	chr2	1.28656	6.07836	15.8785	7.67558e-10	1.49784e-08	HomovsWT
CEP70	80321	ENSG00000114107	chr3	4.19786	-0.0141364	11.1461	5.47683e-08	1.07798e-06	HeterovsWT		MCM7	4176	ENSG00000166508	chr7	-0.751772	9.74767	-16.1634	6.16568e-10	1.26882e-08	HomovsWT
ZADH2	284273	ENSG00000180011	chr18	0.47524	7.13552	11.1448	5.48434e-08	1.07798e-06	HeterovsWT		DNAJC10	54431	ENSG00000077232	chr2	-0.762589	8.19335	-16.0725	6.60967e-10	1.34189e-08	HomovsWT
CNTD1	124817	ENSG00000176563	chr17	2.44525	0.237254	11.1288	5.57806e-08	1.09481e-06	HeterovsWT		EMP1	2012	ENSG00000134531	chr12	3.36118	1.12827	15.2597	1.25072e-09	2.17229e-08	HomovsWT
GOLGA8M	653720	ENSG00000278186	chr15;chr15	-0.588703	6.0459	-11.1251	5.60001e-08	1.09754e-06	HeterovsWT		MAVS	57506	ENSG00000088888	chr20	-0.815287	8.43546	-16.0519	6.71503e-10	1.35518e-08	HomovsWT
LSM14B	149986	ENSG00000149657	chr20	0.526904	6.75952	11.0984	5.76002e-08	1.12727e-06	HeterovsWT		MAST4	375449	ENSG00000069020	chr5	1.63709	3.6661	15.3197	1.19191e-09	2.09155e-08	HomovsWT
BAIAP2L1	55971	ENSG00000006453	chr7	-0.934085	3.5705	-11.08	5.87355e-08	1.14784e-06	HeterovsWT		NLRP3	114548	ENSG00000162711	chr1	-0.989981	5.59376	-15.7023	8.80436e-10	1.66547e-08	HomovsWT
CSGALNACT2	55454	ENSG00000169826	chr10	-0.513493	7.3678	-11.0756	5.90115e-08	1.15157e-06	HeterovsWT		SIPA1	6494	ENSG00000213445	chr11	1.34767	6.93243	15.907	7.50768e-10	1.47354e-08	HomovsWT
CCNF	899	ENSG00000162063	chr16	0.70359	6.2255	11.0732	5.91626e-08	1.15286e-06	HeterovsWT		F8	2157	ENSG00000185010	chrX	-1.37359	4.43086	-15.5283	1.0096e-09	1.83813e-08	HomovsWT
GDI1	2664	ENSG00000203879	chrX	-0.730033	5.32102	-11.0677	5.95057e-08	1.15789e-06	HeterovsWT		C9orf64	84267	ENSG00000165118	chr9	-1.28875	4.47714	-15.4955	1.03618e-09	1.86897e-08	HomovsWT
AC126323.6	NA	NA	chr15	-1.49021	2.59968	-11.0524	6.04815e-08	1.17519e-06	HeterovsWT		CHST11	50515	ENSG00000171310	chr12	0.799012	8.05751	15.9781	7.10676e-10	1.41531e-08	HomovsWT
EGR1	1958	ENSG00000120738	chr5	0.954478	4.36265	11.0491	6.06971e-08	1.17548e-06	HeterovsWT		RFWD3	55159	ENSG00000168411	chr16	0.699839	7.40662	15.9285	7.38389e-10	1.46104e-08	HomovsWT
TMEM127	55654	ENSG00000135956	chr2	0.632679	6.16757	11.0483	6.07465e-08	1.17548e-06	HeterovsWT		THEM4	117145	ENSG00000159445	chr1	-1.51881	4.31292	-15.4526	1.07205e-09	1.92601e-08	HomovsWT
GALK2	2585	ENSG00000156958	chr15	-0.453507	6.94077	-11.0481	6.07559e-08	1.17548e-06	HeterovsWT		BICDL1	92558	ENSG00000135127	chr12	1.65724	2.9544	15.256	1.25443e-09	2.17594e-08	HomovsWT
CPD	1362	ENSG00000108582	chr17	-0.448718	8.63531	-11.0458	6.09068e-08	1.17672e-06	HeterovsWT		HMG20A	10363	ENSG00000140382	chr15	-0.896089	6.12186	-15.7565	8.43906e-10	1.61663e-08	HomovsWT
DMTF1	9988	ENSG00000135164	chr7	-0.599491	6.78891	-11.0441	6.10149e-08	1.17714e-06	HeterovsWT		SIAE	54414	ENSG00000110013	chr11	-1.09788	4.15086	-15.4353	1.08689e-09	1.9373e-08	HomovsWT
USP9X	8239	ENSG00000124486	chrX	-0.494525	7.99431	-11.0311	6.1865e-08	1.19184e-06	HeterovsWT		AC066614.1	NA	NA	chr15	-6.90415	-1.53293	-18.4824	1.1708e-10	3.56543e-09	HomovsWT
DLG1	1739	ENSG00000075711	chr3	-0.693125	6.94881	-11.0115	6.31725e-08	1.21531e-06	HeterovsWT		AZU1	566	ENSG00000278624	chr19	-1.53736	7.28281	-15.8466	7.86791e-10	1.52878e-08	HomovsWT
UPRT	139596	ENSG00000094841	chrX	-1.28787	4.0157	-10.9997	6.39713e-08	1.22894e-06	HeterovsWT		GALNT2	2590	ENSG00000143641	chr1	-0.848577	8.08225	-15.9274	7.39018e-10	1.46104e-08	HomovsWT
FBXO45	200933	ENSG00000174013	chr3	-0.647129	6.07416	-10.9854	6.49538e-08	1.24605e-06	HeterovsWT		NHS	4810	ENSG00000188158	chrX	-2.29171	3.20211	-15.2267	1.28435e-09	2.20253e-08	HomovsWT
CCSER2	54462	ENSG00000107771	chr10	-0.857741	4.96937	-10.9819	6.51959e-08	1.24717e-06	HeterovsWT		LARS	NA	NA	chr5	-0.667648	8.58849	-15.962	7.19552e-10	1.43089e-08	HomovsWT
LAMP2	3920	ENSG00000005893	chrX	-0.913083	8.36279	-10.9832	6.51072e-08	1.24717e-06	HeterovsWT		TCP11L2	255394	ENSG00000166046	chr12	-2.68631	1.54874	-15.1305	1.388e-09	2.34184e-08	HomovsWT
ZNF470	388566	ENSG00000197016	chr19	3.22341	0.916248	10.9772	6.55247e-08	1.2517e-06	HeterovsWT		DENND4A	10260	ENSG00000174485	chr15	-1.13764	6.52472	-15.7524	8.46618e-10	1.61954e-08	HomovsWT
TSPAN2	10100	ENSG00000134198	chr1	-0.70978	5.32112	-10.9737	6.5775e-08	1.25471e-06	HeterovsWT		SYTL1	84958	ENSG00000142765	chr1	1.58017	6.11109	15.6571	9.12216e-10	1.70657e-08	HomovsWT
EIF5B	9669	ENSG00000158417	chr2	0.644513	6.88502	10.97	6.60352e-08	1.25791e-06	HeterovsWT		PPP1R26	9858	ENSG00000196422	chr9	1.48563	3.65856	15.2239	1.28722e-09	2.20323e-08	HomovsWT
AL118508.3	NA	NA	chr20	-3.04377	-0.255267	-10.9551	6.70943e-08	1.2763e-06	HeterovsWT		MELK	9833	ENSG00000165304	chr9	0.912381	6.38737	15.6978	8.83579e-10	1.66677e-08	HomovsWT
REV1	51455	ENSG00000135945	chr2	0.719703	6.51556	10.9386	6.82914e-08	1.29725e-06	HeterovsWT		LIMK2	3985	ENSG00000182541	chr22	1.02107	5.92017	15.6399	9.24602e-10	1.72027e-08	HomovsWT
C18orf54	162681	ENSG00000166845	chr18	0.938107	5.76759	10.9352	6.85418e-08	1.30019e-06	HeterovsWT		STAG3L4	64940	ENSG00000106610	chr7	-1.06903	5.3349	-15.5377	1.00214e-09	1.83191e-08	HomovsWT
F3	2152	ENSG00000117525	chr1	1.4324	2.85646	10.9322	6.87605e-08	1.30252e-06	HeterovsWT		MDGA1	266727	ENSG00000112139	chr6	-2.18072	3.05853	-15.0646	1.46422e-09	2.45519e-08	HomovsWT
NSDHL	50814	ENSG00000147383	chrX	-0.860647	4.82878	-10.9294	6.89659e-08	1.30459e-06	HeterovsWT		TNFRSF21	27242	ENSG00000146072	chr6	-0.796254	5.87095	-15.6176	9.41003e-10	1.74124e-08	HomovsWT
CCDC71	64925	ENSG00000177352	chr3	0.788662	4.78163	10.91	7.04143e-08	1.32829e-06	HeterovsWT		FBXO44	93611	ENSG00000132879	chr1	-2.13632	2.45025	-15.0098	1.53107e-09	2.54841e-08	HomovsWT
PIK3C3	5289	ENSG00000078142	chr18	0.654587	6.55619	10.911	7.03393e-08	1.32829e-06	HeterovsWT		CARM1	10498	ENSG00000142453	chr19	-0.952837	6.37705	-15.6716	9.01919e-10	1.69431e-08	HomovsWT
PLEKHF1	79156	ENSG00000166289	chr19	-0.96623	4.21522	-10.9004	7.11476e-08	1.34026e-06	HeterovsWT		ACVR2A	92	ENSG00000121989	chr2	-2.73789	1.85365	-15.0479	1.48432e-09	2.48341e-08	HomovsWT
TMEM132B	114795	ENSG00000139364	chr12	-0.613005	5.46773	-10.8913	7.18489e-08	1.3516e-06	HeterovsWT		PCYT1B	9468	ENSG00000102230	chrX	-4.71543	0.446887	-15.9216	7.42338e-10	1.46334e-08	HomovsWT
MEX3C	51320	ENSG00000176624	chr18	0.593274	6.52126	10.888	7.21041e-08	1.35452e-06	HeterovsWT		KIF17	57576	ENSG00000117245	chr1	-3.56223	0.672808	-15.2809	1.22959e-09	2.14381e-08	HomovsWT
SLC2A3	6515	ENSG00000059804	chr12	-0.793967	5.73038	-10.8845	7.23731e-08	1.35769e-06	HeterovsWT		HLF	3131	ENSG00000108924	chr17	-7.60604	-0.786435	-17.9299	1.70786e-10	4.74306e-09	HomovsWT
FRMD4A	55691	ENSG00000151474	chr10	-1.67186	0.756364	-10.8815	7.26102e-08	1.35839e-06	HeterovsWT		SH3BGRL	6451	ENSG00000131171	chrX	-1.46065	6.29823	-15.612	9.45135e-10	1.74651e-08	HomovsWT
AC132008.2	NA	NA	chr3	-0.679416	4.97831	-10.8815	7.26039e-08	1.35839e-06	HeterovsWT		STK26	51765	ENSG00000134602	chrX	-1.28277	7.40997	-15.7432	8.52716e-10	1.62565e-08	HomovsWT
CYTL1	54360	ENSG00000170891	chr4	-2.16972	1.28564	-10.8706	7.34683e-08	1.37255e-06	HeterovsWT		AC011505.1	NA	NA	chr19	-8.23866	-0.777905	-17.7732	1.90466e-10	5.18439e-09	HomovsWT
TXN	7295	ENSG00000136810	chr9	0.923359	7.79385	10.8623	7.41281e-08	1.38298e-06	HeterovsWT		MAPRE1	22919	ENSG00000101367	chr20	0.773128	7.06894	15.7085	8.76193e-10	1.65976e-08	HomovsWT
ATAD2	29028	ENSG00000156802	chr8	0.511971	8.51508	10.8524	7.49234e-08	1.3959e-06	HeterovsWT		CD300A	11314	ENSG00000167851	chr17	1.54902	3.69754	15.2285	1.28241e-09	2.20199e-08	HomovsWT
TBL2	26608	ENSG00000106638	chr7	-0.68229	6.11986	-10.8461	7.54309e-08	1.40343e-06	HeterovsWT		RNF24	11237	ENSG00000101236	chr20	-0.754714	8.35585	-15.7754	8.31584e-10	1.59528e-08	HomovsWT
PANX2	56666	ENSG00000073150	chr22	4.05832	-2.76207	10.8323	7.65593e-08	1.42247e-06	HeterovsWT		CSGALNACT1	55790	ENSG00000147408	chr8	-2.02297	2.8048	-14.96	1.59462e-09	2.61889e-08	HomovsWT
SLC25A53	401612	ENSG00000269743	chrX	-1.03122	4.21078	-10.8307	7.66941e-08	1.42303e-06	HeterovsWT		DNASE2	1777	ENSG00000105612	chr19	-1.02639	5.79518	-15.531	1.00746e-09	1.83668e-08	HomovsWT
RAB27A	5873	ENSG00000069974	chr15	-0.569385	7.85288	-10.8275	7.69642e-08	1.4261e-06	HeterovsWT		LINC02577	111216280	ENSG00000228742	chr7	-2.80058	2.20793	-14.9293	1.63515e-09	2.6629e-08	HomovsWT
TMEM255B	348013	ENSG00000184497	chr13	-0.632625	4.94659	-10.8193	7.76472e-08	1.43292e-06	HeterovsWT		CSPG4	1464	ENSG00000173546	chr15	-2.52152	3.51387	-14.9294	1.63505e-09	2.6629e-08	HomovsWT
WARS	NA	NA	chr14	-0.576704	6.20978	-10.8193	7.76488e-08	1.43292e-06	HeterovsWT		TPST1	8460	ENSG00000169902	chr7	-1.99205	3.31054	-14.9752	1.57496e-09	2.59916e-08	HomovsWT
VMP1	81671	ENSG00000062716	chr17	-0.5583	6.15725	-10.8213	7.74789e-08	1.43292e-06	HeterovsWT		AP001574.1	NA	NA	chr8	-4.10055	1.19166	-15.3335	1.17887e-09	2.07671e-08	HomovsWT
GLCE	26035	ENSG00000138604	chr15	-1.01235	4.1624	-10.8173	7.78177e-08	1.43408e-06	HeterovsWT		HSPA9	3313	ENSG00000113013	chr5	-0.634115	8.96627	-15.7495	8.48586e-10	1.62103e-08	HomovsWT
ZSCAN31	64288	ENSG00000235109	chr6	1.15353	3.39386	10.8044	7.89071e-08	1.45219e-06	HeterovsWT		FOXK1	221937	ENSG00000164916	chr7	0.759004	8.87764	15.7415	8.5385e-10	1.62565e-08	HomovsWT
SYNGR1	9145	ENSG00000100321	chr22	0.740781	5.1407	10.7984	7.94181e-08	1.45962e-06	HeterovsWT		SPTBN1	6711	ENSG00000115306	chr2	0.696161	8.10922	15.7003	8.81872e-10	1.66587e-08	HomovsWT
VSIG4	11326	ENSG00000155659	chrX	-1.29148	3.0519	-10.7948	7.97286e-08	1.46334e-06	HeterovsWT		SENP2	59343	ENSG00000163904	chr3	0.918242	5.81432	15.4381	1.08447e-09	1.93612e-08	HomovsWT
SYT7	9066	ENSG00000011347	chr11	1.82491	0.90465	10.7798	8.1036e-08	1.48533e-06	HeterovsWT		GCSIR	151484	ENSG00000232520	chr2	-6.6027	-1.36543	-18.0364	1.58667e-10	4.50841e-09	HomovsWT
NFIX	4784	ENSG00000008441	chr19	-0.683586	5.78619	-10.7714	8.17805e-08	1.49696e-06	HeterovsWT		VMP1	81671	ENSG00000062716	chr17	-0.817106	6.15725	-15.5036	1.0296e-09	1.85957e-08	HomovsWT
CHST12	55501	ENSG00000136213	chr7	0.682536	5.84816	10.7565	8.31108e-08	1.51926e-06	HeterovsWT		DNAAF5	54919	ENSG00000164818	chr7	0.96125	7.45827	15.646	9.20163e-10	1.71661e-08	HomovsWT
FGR	2268	ENSG00000000938	chr1	-0.678985	4.95536	-10.7535	8.33807e-08	1.52215e-06	HeterovsWT		TCF12	6938	ENSG00000140262	chr15	-0.881697	8.43979	-15.6897	8.89178e-10	1.67269e-08	HomovsWT
MAPK9	5601	ENSG00000050748	chr5	-0.507616	6.64004	-10.7523	8.34956e-08	1.5222e-06	HeterovsWT		HDDC2	51020	ENSG00000111906	chr6	-1.11028	5.35482	-15.3485	1.16483e-09	2.0573e-08	HomovsWT
SMPD4	55627	ENSG00000136699	chr2	0.506326	7.38226	10.7507	8.36369e-08	1.52273e-06	HeterovsWT		OSBPL5	114879	ENSG00000021762	chr11	0.904792	7.91046	15.6444	9.21373e-10	1.71661e-08	HomovsWT
CORO1B	57175	ENSG00000172725	chr11	1.25366	4.18343	10.7437	8.42741e-08	1.53228e-06	HeterovsWT		PDE4D	5144	ENSG00000113448	chr5	-1.18157	8.29293	-15.6671	9.05072e-10	1.69789e-08	HomovsWT
KLF9	687	ENSG00000119138	chr9	-0.717171	5.15954	-10.7376	8.48429e-08	1.54056e-06	HeterovsWT		C2orf72	257407	ENSG00000204128	chr2	-7.32525	-3.2219	-17.7272	1.96696e-10	5.30065e-09	HomovsWT
CORO2B	10391	ENSG00000103647	chr15	-0.998114	2.1251	-10.7282	8.57089e-08	1.5542e-06	HeterovsWT		LINC02762	283140	ENSG00000250303	chr11	1.436	2.74581	14.967	1.58554e-09	2.61028e-08	HomovsWT
RNLS	55328	ENSG00000184719	chr10	-0.867539	4.14999	-10.7216	8.6326e-08	1.56331e-06	HeterovsWT		C12orf75	387882	ENSG00000235162	chr12	-0.846696	5.09403	-15.3312	1.18097e-09	2.07772e-08	HomovsWT
VLDLR-AS1	401491	ENSG00000236404	chr9	-0.644692	5.24866	-10.7186	8.66076e-08	1.56617e-06	HeterovsWT		GPR155	151556	ENSG00000163328	chr2	-1.93808	2.61708	-14.843	1.75529e-09	2.82803e-08	HomovsWT
GZF1	64412	ENSG00000125812	chr20	-0.588455	5.62972	-10.7175	8.6715e-08	1.56617e-06	HeterovsWT		PHF8	23133	ENSG00000172943	chrX	-0.810912	6.35046	-15.4916	1.03941e-09	1.87231e-08	HomovsWT
OLFML2B	25903	ENSG00000162745	chr1	-1.60384	0.733646	-10.7147	8.69813e-08	1.5689e-06	HeterovsWT		SECISBP2L	9728	ENSG00000138593	chr15	-0.825034	5.94271	-15.4116	1.1076e-09	1.96904e-08	HomovsWT
GATAD1	57798	ENSG00000157259	chr7	-0.936446	4.81667	-10.7117	8.72636e-08	1.5719e-06	HeterovsWT		FBXO22	26263	ENSG00000167196	chr15	-0.889164	5.83504	-15.3901	1.12678e-09	2.00051e-08	HomovsWT
UNK	85451	ENSG00000132478	chr17	0.596624	5.40512	10.7084	8.75755e-08	1.57543e-06	HeterovsWT		CEP152	22995	ENSG00000103995	chr15	-0.881885	6.87962	-15.5115	1.02314e-09	1.8553e-08	HomovsWT
BCL7A	605	ENSG00000282873	chr12	0.638754	5.70051	10.6961	8.87614e-08	1.59465e-06	HeterovsWT		DTNB	1838	ENSG00000138101	chr2	1.04607	6.06273	15.4202	1.10004e-09	1.95815e-08	HomovsWT
CDK2AP1	8099	ENSG00000111328	chr12	0.729994	4.89734	10.6862	8.97263e-08	1.60562e-06	HeterovsWT		FAM3A	60343	ENSG00000071889	chrX	-1.17027	4.77281	-15.2231	1.288e-09	2.20323e-08	HomovsWT
PPP1R15A	23645	ENSG00000087074	chr19	-0.73684	5.26374	-10.6864	8.9708e-08	1.60562e-06	HeterovsWT		ARHGAP9	64333	ENSG00000123329	chr12	1.11573	5.06403	15.2852	1.22532e-09	2.13911e-08	HomovsWT
FNDC3B	64778	ENSG00000075420	chr3	-0.544443	8.90927	-10.6868	8.9672e-08	1.60562e-06	HeterovsWT		LAMP2	3920	ENSG00000005893	chrX	-1.31401	8.36279	-15.6235	9.36634e-10	1.73552e-08	HomovsWT
SH3BGRL	6451	ENSG00000131171	chrX	-0.955918	6.29823	-10.6847	8.98753e-08	1.60617e-06	HeterovsWT		ACTL8	81569	ENSG00000117148	chr1	-3.80305	1.22758	-15.1551	1.36071e-09	2.30726e-08	HomovsWT
DHCR24	1718	ENSG00000116133	chr1	0.609029	9.34417	10.6824	9.0105e-08	1.60815e-06	HeterovsWT		AC012513.3	NA	NA	chr2	1.94795	2.59147	14.8027	1.81463e-09	2.89275e-08	HomovsWT
FANCB	2187	ENSG00000181544	chrX	-0.638075	6.02435	-10.6771	9.0621e-08	1.61524e-06	HeterovsWT		ACTR1A	10121	ENSG00000138107	chr10	0.700731	6.99955	15.5093	1.02496e-09	1.85551e-08	HomovsWT
PNMA6A	84968	ENSG00000235961	chrX	6.21733	0.0680415	10.6591	9.24239e-08	1.64522e-06	HeterovsWT		TMEM177	80775	ENSG00000144120	chr2	-1.61174	3.59994	-14.8993	1.67586e-09	2.72266e-08	HomovsWT
MTMR1	8776	ENSG00000063601	chrX	-0.747129	5.27036	-10.6454	9.38246e-08	1.66797e-06	HeterovsWT		TNRC6C-AS1	NA	NA	chr17	3.11713	1.65919	14.786	1.83981e-09	2.92602e-08	HomovsWT
ZNF331	55422	ENSG00000130844	chr19	-1.54603	2.26812	-10.63	9.54154e-08	1.69403e-06	HeterovsWT		ADA2	51816	ENSG00000093072	chr22	-0.835357	6.87903	-15.4449	1.07865e-09	1.9353e-08	HomovsWT
HMGN2	3151	ENSG00000198830	chr1	0.440224	10.1941	10.628	9.56338e-08	1.69569e-06	HeterovsWT		ACSL4	2182	ENSG00000068366	chrX	-0.802404	7.53456	-15.5437	9.97404e-10	1.83064e-08	HomovsWT
FGFR2	2263	ENSG00000066468	chr10	2.98275	-2.05293	10.6222	9.62374e-08	1.70417e-06	HeterovsWT		SLC6A8	6535	ENSG00000130821	chrX	-2.60074	1.83632	-14.7496	1.89615e-09	2.98765e-08	HomovsWT
NQO1	1728	ENSG00000181019	chr16	0.612112	5.81326	10.6193	9.65458e-08	1.70518e-06	HeterovsWT		PASK	23178	ENSG00000115687	chr2	1.11079	5.0253	15.1862	1.32688e-09	2.25573e-08	HomovsWT
FYTTD1	84248	ENSG00000122068	chr3	-0.822862	6.82719	-10.6196	9.65162e-08	1.70518e-06	HeterovsWT		FAM86B3P	286042	ENSG00000173295	chr8	-2.26181	2.67914	-14.7267	1.93244e-09	3.03339e-08	HomovsWT
UACA	55075	ENSG00000137831	chr15	-0.96598	4.21888	-10.6119	9.73307e-08	1.71681e-06	HeterovsWT		ERBIN	55914	ENSG00000112851	chr5	0.99263	8.02691	15.5396	1.00063e-09	1.83191e-08	HomovsWT
PLXNB2	23654	ENSG00000196576	chr22	2.27075	0.463727	10.6092	9.76233e-08	1.71974e-06	HeterovsWT		REPS1	85021	ENSG00000135597	chr6	-0.751744	6.21575	-15.3597	1.15442e-09	2.04424e-08	HomovsWT
EIF1AX	1964	ENSG00000173674	chrX	-0.602749	7.60051	-10.6	9.86172e-08	1.735e-06	HeterovsWT		TLR2	7097	ENSG00000137462	chr4	7.80746	1.56941	17.0548	3.17687e-10	7.55662e-09	HomovsWT
P3H3	10536	ENSG00000110811	chr12	1.45602	3.10523	10.5964	9.90047e-08	1.73732e-06	HeterovsWT		ITGA7	3679	ENSG00000135424	chr12	-1.43463	5.42317	-15.1861	1.327e-09	2.25573e-08	HomovsWT
BCL7B	9275	ENSG00000106635	chr7	-0.602432	5.74816	-10.5973	9.89041e-08	1.73732e-06	HeterovsWT		RNF135	84282	ENSG00000181481	chr17	-0.935233	5.23613	-15.1922	1.32055e-09	2.2504e-08	HomovsWT
GK	2710	ENSG00000198814	chrX	-0.833892	4.8916	-10.5911	9.95866e-08	1.74527e-06	HeterovsWT		TSPEAR	54084	ENSG00000175894	chr21	-6.60562	-1.36843	-17.6688	2.04915e-10	5.43585e-09	HomovsWT
SNX20	124460	ENSG00000167208	chr16	-0.806832	4.44268	-10.5845	1.00311e-07	1.75569e-06	HeterovsWT		KIFC3	3801	ENSG00000140859	chr16	-4.51231	0.47541	-15.5665	9.79603e-10	1.80284e-08	HomovsWT
H2AFV	NA	NA	chr7	0.452622	8.67472	10.583	1.00475e-07	1.75631e-06	HeterovsWT		MYO3B	140469	ENSG00000071909	chr2	-3.70782	1.19985	-15.0379	1.49636e-09	2.49676e-08	HomovsWT
NLRP12	91662	ENSG00000142405	chr19	-1.25001	3.91144	-10.578	1.01028e-07	1.76371e-06	HeterovsWT		UBA1	7317	ENSG00000130985	chrX	-0.767391	8.97993	-15.5389	1.0012e-09	1.83191e-08	HomovsWT
TBC1D4	9882	ENSG00000136111	chr13	-0.581137	7.38246	-10.5765	1.01202e-07	1.76447e-06	HeterovsWT		PSMD14	10213	ENSG00000115233	chr2	-0.891813	7.37962	-15.4377	1.08481e-09	1.93612e-08	HomovsWT
CERT1	10087	ENSG00000113163	chr5	-0.56145	6.84299	-10.5673	1.02228e-07	1.78008e-06	HeterovsWT		YWHAG	7532	ENSG00000170027	chr7	-0.711008	9.03009	-15.5242	1.01294e-09	1.84009e-08	HomovsWT
CC2D1A	54862	ENSG00000288293	chr19	-0.672808	5.51246	-10.5614	1.02892e-07	1.78706e-06	HeterovsWT		ACTR3	10096	ENSG00000115091	chr2	-0.763775	8.81174	-15.508	1.02598e-09	1.85551e-08	HomovsWT
NUP210	23225	ENSG00000132182	chr3	0.48016	10.5672	10.5617	1.0286e-07	1.78706e-06	HeterovsWT		HLA-DRB1	3123	ENSG00000236884	chr6	-4.00226	1.4637	-14.9363	1.62587e-09	2.66054e-08	HomovsWT
PPP1R26	9858	ENSG00000196422	chr9	1.06542	3.65856	10.5584	1.03232e-07	1.79067e-06	HeterovsWT		TMEM263	90488	ENSG00000151135	chr12	-1.28911	5.00705	-15.0475	1.48471e-09	2.48341e-08	HomovsWT
RAVER2	55225	ENSG00000162437	chr1	0.860211	4.6714	10.5531	1.03839e-07	1.79891e-06	HeterovsWT		RRN3P1	730092	NA	chr16	-0.857017	5.94926	-15.2366	1.27411e-09	2.19327e-08	HomovsWT
ZBTB20	26137	ENSG00000181722	chr3	-0.959288	4.86678	-10.548	1.04424e-07	1.80674e-06	HeterovsWT		GLS	2744	ENSG00000115419	chr2	-0.89882	8.25358	-15.4546	1.07036e-09	1.92551e-08	HomovsWT
PCYT1B	9468	ENSG00000102230	chrX	-1.72162	0.446887	-10.5462	1.04635e-07	1.80808e-06	HeterovsWT		ACBD6	84320	ENSG00000230124	chr1	-0.771898	6.50851	-15.2853	1.2252e-09	2.13911e-08	HomovsWT
CFAP61	26074	ENSG00000089101	chr20	-1.46487	0.623918	-10.5311	1.0639e-07	1.83607e-06	HeterovsWT		CXCR4	7852	ENSG00000121966	chr2	-1.07519	7.35738	-15.3485	1.16481e-09	2.0573e-08	HomovsWT
HDGF	3068	ENSG00000143321	chr1	0.450897	9.03834	10.5294	1.06593e-07	1.83725e-06	HeterovsWT		MEF2D	4209	ENSG00000116604	chr1	-0.865578	6.82017	-15.2541	1.25636e-09	2.17652e-08	HomovsWT
TMC3-AS1	101929655	NA	chr15	-0.980111	3.9183	-10.5279	1.06775e-07	1.83804e-06	HeterovsWT		FARSA	2193	ENSG00000179115	chr19	-0.781753	6.83863	-15.2981	1.21274e-09	2.12262e-08	HomovsWT
LINC01277	100507489	NA	chr6	2.23191	0.713704	10.5191	1.07821e-07	1.8537e-06	HeterovsWT		CLCN5	1184	ENSG00000171365	chrX	-1.08893	6.35666	-15.2376	1.2731e-09	2.19327e-08	HomovsWT
ATP6AP2	10159	ENSG00000182220	chrX	-0.561649	7.26016	-10.511	1.08781e-07	1.86785e-06	HeterovsWT		ATP2B1	490	ENSG00000070961	chr12	0.77677	6.27536	15.2319	1.27894e-09	2.19881e-08	HomovsWT
PIK3C2B	5287	ENSG00000133056	chr1	-0.533597	6.21966	-10.5088	1.09057e-07	1.87022e-06	HeterovsWT		PRTG	283659	ENSG00000166450	chr15	-9.68948	-1.10253	-16.8833	3.59999e-10	8.28729e-09	HomovsWT
CNNM4	26504	ENSG00000158158	chr2	0.737914	4.77526	10.5028	1.09775e-07	1.88015e-06	HeterovsWT		CAPN2	824	ENSG00000162909	chr1	-0.874488	7.49624	-15.3342	1.17821e-09	2.07671e-08	HomovsWT
NCAM1	4684	ENSG00000149294	chr11	-1.15227	3.22574	-10.5004	1.10069e-07	1.88282e-06	HeterovsWT		SUMF2	25870	ENSG00000129103	chr7	0.716525	8.05991	15.3664	1.14822e-09	2.03592e-08	HomovsWT
MPC1	51660	ENSG00000060762	chr6	-0.74717	5.55028	-10.4962	1.10586e-07	1.88928e-06	HeterovsWT		TP73-AS1	57212	ENSG00000227372	chr1	-7.95158	-2.70029	-17.0381	3.21568e-10	7.61365e-09	HomovsWT
GATB	5188	ENSG00000059691	chr4	0.648118	5.00047	10.4933	1.1094e-07	1.89295e-06	HeterovsWT		FAM178B	51252	ENSG00000168754	chr2	2.65319	1.2061	14.5632	2.21466e-09	3.34961e-08	HomovsWT
FUNDC2	65991	ENSG00000165775	chrX	-0.877237	5.00618	-10.4894	1.11416e-07	1.89869e-06	HeterovsWT		MELTF	4241	ENSG00000163975	chr3	-1.21228	4.88893	-14.9553	1.60072e-09	2.62415e-08	HomovsWT
TRIM73	375593	ENSG00000178809	chr7	-1.44139	1.78695	-10.4877	1.1163e-07	1.89961e-06	HeterovsWT		NCF1C	654817	ENSG00000165178	chr7	2.86554	1.76136	14.5214	2.29362e-09	3.43841e-08	HomovsWT
USP18	11274	ENSG00000184979	chr22	0.966357	3.46626	10.4867	1.1175e-07	1.89961e-06	HeterovsWT		NUP42	11097	ENSG00000136243	chr7	0.757266	5.95528	15.1388	1.37876e-09	2.32915e-08	HomovsWT
RNF24	11237	ENSG00000101236	chr20	-0.498086	8.35585	-10.4813	1.12431e-07	1.9088e-06	HeterovsWT		ABHD12	26090	ENSG00000100997	chr20	-0.845146	6.88185	-15.2215	1.28971e-09	2.20337e-08	HomovsWT
TREM1	54210	ENSG00000124731	chr6	-2.83989	-0.669899	-10.475	1.13215e-07	1.91278e-06	HeterovsWT		EMILIN2	84034	ENSG00000132205	chr18	-0.72164	7.38113	-15.2715	1.2389e-09	2.15727e-08	HomovsWT
GPR85	54329	ENSG00000164604	chr7	-1.70701	1.55209	-10.4741	1.13326e-07	1.91278e-06	HeterovsWT		TRPM7	54822	ENSG00000092439	chr15	-0.85892	8.2813	-15.3228	1.18899e-09	2.08911e-08	HomovsWT
DNHD1	144132	ENSG00000179532	chr11	-0.710244	5.16477	-10.4726	1.13511e-07	1.91278e-06	HeterovsWT		AGAP2	116986	ENSG00000135439	chr12	1.27928	4.10373	14.7876	1.83737e-09	2.92557e-08	HomovsWT
C11orf95	NA	NA	chr11	0.744724	5.51413	10.4745	1.13281e-07	1.91278e-06	HeterovsWT		BCL7A	605	ENSG00000282873	chr12	0.88407	5.70051	15.0415	1.49203e-09	2.49258e-08	HomovsWT
CEP78	84131	ENSG00000148019	chr9	-0.561563	6.23894	-10.4732	1.13438e-07	1.91278e-06	HeterovsWT		LINC01184	644873	ENSG00000245937	chr5	-1.11477	4.67571	-14.8751	1.70957e-09	2.76751e-08	HomovsWT
VAMP3	9341	ENSG00000049245	chr1	0.491722	6.63275	10.4751	1.13196e-07	1.91278e-06	HeterovsWT		AC013565.1	NA	NA	chr15	-8.13995	-1.67025	-16.7993	3.82927e-10	8.66819e-09	HomovsWT
DNMT3B	1789	ENSG00000088305	chr20	0.724691	6.17154	10.4695	1.13909e-07	1.91712e-06	HeterovsWT		FEM1B	10116	ENSG00000169018	chr15	-0.697956	7.45408	-15.2459	1.26461e-09	2.18348e-08	HomovsWT
COL18A1	80781	ENSG00000182871	chr21	1.21602	2.26083	10.4615	1.14923e-07	1.93041e-06	HeterovsWT		ARHGEF6	9459	ENSG00000129675	chrX	-1.02694	8.37047	-15.3058	1.20527e-09	2.11226e-08	HomovsWT
SHTN1	57698	ENSG00000187164	chr10	5.83409	-2.92498	10.461	1.14983e-07	1.93041e-06	HeterovsWT		LINC02615	100507487	ENSG00000251432	chr4	-1.58223	3.5729	-14.6024	2.14313e-09	3.27424e-08	HomovsWT
KCND2	3751	ENSG00000184408	chr7	3.08126	1.58212	10.4583	1.15339e-07	1.934e-06	HeterovsWT		RAB27A	5873	ENSG00000069974	chr15	-0.808864	7.85288	-15.2489	1.26156e-09	2.18274e-08	HomovsWT
TPGS2	25941	ENSG00000134779	chr18	0.615526	6.44675	10.454	1.15879e-07	1.94066e-06	HeterovsWT		NBDY	550643	ENSG00000204272	chrX	-6.80578	0.00858057	-16.5349	4.65843e-10	1.01289e-08	HomovsWT
MTUS2	23281	ENSG00000132938	chr13	1.99308	1.17427	10.4243	1.19782e-07	2.00354e-06	HeterovsWT		SLC12A6	9990	ENSG00000140199	chr15	1.33383	5.46731	14.9821	1.56608e-09	2.59397e-08	HomovsWT
HEG1	57493	ENSG00000173706	chr3	-0.709487	6.12607	-10.4209	1.20236e-07	2.00867e-06	HeterovsWT		GANC	2595	ENSG00000214013	chr15	-1.23483	5.1817	-14.8937	1.68368e-09	2.73128e-08	HomovsWT
KBTBD8	84541	ENSG00000163376	chr3	-1.07852	3.11355	-10.419	1.20492e-07	2.01048e-06	HeterovsWT		SLC9A9	285195	ENSG00000181804	chr3	-1.85458	2.58656	-14.4496	2.43649e-09	3.59309e-08	HomovsWT
ZNF573	126231	ENSG00000189144	chr19	-1.39048	2.67938	-10.4155	1.20957e-07	2.01287e-06	HeterovsWT		GBA2	57704	ENSG00000070610	chr9	1.08044	5.14787	14.9037	1.66988e-09	2.71621e-08	HomovsWT
ZDHHC23	254887	ENSG00000184307	chr3	0.814554	4.99494	10.4146	1.21081e-07	2.01287e-06	HeterovsWT		CRYZ	1429	ENSG00000116791	chr1	1.14388	4.05153	14.6932	1.9869e-09	3.08754e-08	HomovsWT
PIMREG	54478	ENSG00000129195	chr17	0.651119	5.09116	10.4166	1.20814e-07	2.01287e-06	HeterovsWT		TOP1MT	116447	ENSG00000184428	chr8	-0.778734	6.42353	-15.0887	1.43583e-09	2.41355e-08	HomovsWT
ART3	419	ENSG00000156219	chr4	-1.65701	0.766489	-10.4132	1.21265e-07	2.01347e-06	HeterovsWT		LYSMD4	145748	ENSG00000183060	chr15	-1.31009	3.76724	-14.5955	2.15549e-09	3.28573e-08	HomovsWT
ARID5A	10865	ENSG00000196843	chr2	0.641095	5.71214	10.4028	1.22685e-07	2.03456e-06	HeterovsWT		ADAMTS7	11173	ENSG00000136378	chr15	-1.91518	3.01387	-14.4319	2.47327e-09	3.62765e-08	HomovsWT
KIF2C	11004	ENSG00000142945	chr1	0.482627	7.27432	10.3957	1.23661e-07	2.04825e-06	HeterovsWT		TMEM156	80008	ENSG00000121895	chr4	1.61627	2.74791	14.4822	2.3706e-09	3.52657e-08	HomovsWT
STAG3L2	442582	NA	chr7	-0.649204	6.21257	-10.3839	1.2531e-07	2.07304e-06	HeterovsWT		GPRC5B	51704	ENSG00000167191	chr16	-6.90929	-1.25204	-17.0102	3.28152e-10	7.711e-09	HomovsWT
CHSY1	22856	ENSG00000131873	chr15	0.418979	8.90253	10.3814	1.2565e-07	2.07612e-06	HeterovsWT		NRP2	8828	ENSG00000118257	chr2	-8.08581	0.633553	-16.6042	4.42384e-10	9.73818e-09	HomovsWT
MELK	9833	ENSG00000165304	chr9	0.61211	6.38737	10.3726	1.26903e-07	2.09429e-06	HeterovsWT		MCF2L	23263	ENSG00000126217	chr13	1.64497	3.50271	14.4754	2.38413e-09	3.53893e-08	HomovsWT
SH3TC1	54436	ENSG00000125089	chr4	0.867788	6.09765	10.3379	1.31923e-07	2.17231e-06	HeterovsWT		HDAC6	10013	ENSG00000094631	chrX	-0.934537	6.14123	-14.9999	1.5435e-09	2.56282e-08	HomovsWT
WWC3	55841	ENSG00000047644	chrX	-0.437848	7.17879	-10.3377	1.31951e-07	2.17231e-06	HeterovsWT		SNX33	257364	ENSG00000173548	chr15	-1.06228	4.55769	-14.6937	1.98609e-09	3.08754e-08	HomovsWT
SUMF1	285362	ENSG00000144455	chr3	0.507448	6.65269	10.3358	1.32242e-07	2.17447e-06	HeterovsWT		TBC1D14	57533	ENSG00000132405	chr4	0.63853	7.98763	15.1952	1.31729e-09	2.24766e-08	HomovsWT
PTPN12	5782	ENSG00000127947	chr7	-0.649925	7.03428	-10.3121	1.35807e-07	2.23039e-06	HeterovsWT		PAFAH1B1	5048	ENSG00000007168	chr17	0.630872	7.32193	15.1481	1.36836e-09	2.31735e-08	HomovsWT
C19orf57	NA	NA	chr19	0.947497	3.99207	10.3076	1.36496e-07	2.23899e-06	HeterovsWT		ZNF518B	85460	ENSG00000178163	chr4	-1.4664	4.96495	-14.7789	1.85068e-09	2.93233e-08	HomovsWT
AC245123.1	NA	NA	chr8	-3.36809	-0.733085	-10.3049	1.36907e-07	2.24033e-06	HeterovsWT		C11orf21	29125	ENSG00000110665	chr11	0.909184	5.79258	14.9546	1.6017e-09	2.62415e-08	HomovsWT
APOO	79135	ENSG00000184831	chrX	-0.721112	3.79401	-10.3058	1.36765e-07	2.24033e-06	HeterovsWT		REEP6	92840	ENSG00000115255	chr19	-1.37669	3.39283	-14.5088	2.31802e-09	3.46733e-08	HomovsWT
TYMS	7298	ENSG00000176890	chr18	0.688521	6.49649	10.3012	1.37474e-07	2.24689e-06	HeterovsWT		DCAKD	79877	ENSG00000172992	chr17	1.23678	5.26717	14.8253	1.78116e-09	2.8528e-08	HomovsWT
OPRD1	4985	ENSG00000116329	chr1	3.07423	-0.439923	10.2977	1.38022e-07	2.25104e-06	HeterovsWT		DAPK2	23604	ENSG00000035664	chr15	-2.49581	1.81018	-14.3699	2.60639e-09	3.77651e-08	HomovsWT
CENPF	1063	ENSG00000117724	chr1	0.496826	8.72321	10.2975	1.38059e-07	2.25104e-06	HeterovsWT		TSPAN10	83882	ENSG00000182612	chr17	-6.2014	-2.01917	-17.155	2.95462e-10	7.2654e-09	HomovsWT
CLK2	1196	ENSG00000261893	chr1	0.490192	6.18334	10.2952	1.38407e-07	2.25401e-06	HeterovsWT		TTC9	23508	ENSG00000133985	chr14	1.34836	3.56895	14.5609	2.21894e-09	3.3511e-08	HomovsWT
RP2	6102	ENSG00000102218	chrX	-0.516997	6.06581	-10.271	1.4224e-07	2.31366e-06	HeterovsWT		USP9X	8239	ENSG00000124486	chrX	-0.683165	7.99431	-15.1462	1.37055e-09	2.31817e-08	HomovsWT
LINC01500	102723742	ENSG00000258583	chr14	2.03029	0.31692	10.2641	1.4334e-07	2.32877e-06	HeterovsWT		SERPINB1	1992	ENSG00000021355	chr6	-0.757247	7.72029	-15.1257	1.39345e-09	2.34813e-08	HomovsWT
EHD2	30846	ENSG00000024422	chr19	1.82831	1.63084	10.2484	1.459e-07	2.36752e-06	HeterovsWT		ARPC5	10092	ENSG00000162704	chr1	-0.76421	7.74755	-15.1198	1.40009e-09	2.35638e-08	HomovsWT
SYTL1	84958	ENSG00000142765	chr1	1.06054	6.11109	10.2458	1.46342e-07	2.37037e-06	HeterovsWT		ZBTB38	253461	ENSG00000177311	chr3	-1.31146	3.72767	-14.5405	2.25719e-09	3.39503e-08	HomovsWT
CNOT11	55571	ENSG00000158435	chr2	0.570479	6.34888	10.2453	1.46425e-07	2.37037e-06	HeterovsWT		SFMBT1	51460	ENSG00000163935	chr3	0.931585	5.12999	14.7796	1.84965e-09	2.93233e-08	HomovsWT
TRNP1	388610	ENSG00000253368	chr1	3.36429	-0.32897	10.2336	1.48362e-07	2.39705e-06	HeterovsWT		SYNPO	11346	ENSG00000171992	chr5	-4.62576	0.885157	-14.9303	1.6339e-09	2.6629e-08	HomovsWT
SMC5	23137	ENSG00000198887	chr9	-0.88745	6.85711	-10.2333	1.48426e-07	2.39705e-06	HeterovsWT		CLCN6	1185	ENSG00000011021	chr1	0.749939	6.38935	14.9736	1.57702e-09	2.59941e-08	HomovsWT
IGF2BP2	10644	ENSG00000073792	chr3	0.75113	5.31479	10.2307	1.48861e-07	2.39921e-06	HeterovsWT		SVIL	6840	ENSG00000197321	chr10	0.968726	5.44762	14.8137	1.79819e-09	2.87329e-08	HomovsWT
KNTC1	9735	ENSG00000184445	chr12	0.417441	7.7895	10.2304	1.48913e-07	2.39921e-06	HeterovsWT		YIPF6	286451	ENSG00000181704	chrX	-0.77544	5.48689	-14.8362	1.76525e-09	2.83735e-08	HomovsWT
HERC1	8925	ENSG00000103657	chr15	-0.437893	7.7701	-10.2269	1.49504e-07	2.40589e-06	HeterovsWT		ART3	419	ENSG00000156219	chr4	-5.89801	0.766489	-15.2668	1.24361e-09	2.16271e-08	HomovsWT
INPP5A	3632	ENSG00000068383	chr10	0.619573	7.21875	10.2253	1.49774e-07	2.40738e-06	HeterovsWT		SOBP	55084	ENSG00000112320	chr6	1.18404	5.23766	14.7663	1.87e-09	2.95329e-08	HomovsWT
RBM48	84060	ENSG00000127993	chr7	-0.768442	4.47111	-10.2227	1.50216e-07	2.41163e-06	HeterovsWT		CLDN18	51208	ENSG00000066405	chr3	-1.54982	3.56535	-14.4012	2.53821e-09	3.69591e-08	HomovsWT
ANKRD18DP	348840	ENSG00000226435	chr3	-0.744257	4.06833	-10.2098	1.52426e-07	2.44422e-06	HeterovsWT		ARID3C	138715	ENSG00000205143	chr9	2.63467	1.32168	14.2365	2.91985e-09	4.13528e-08	HomovsWT
DYNC2H1	79659	ENSG00000187240	chr11	-0.630985	5.35604	-10.1861	1.56575e-07	2.50779e-06	HeterovsWT		CRAT	1384	ENSG00000095321	chr9	0.956716	4.9768	14.6822	2.00522e-09	3.10193e-08	HomovsWT
MMP2	4313	ENSG00000087245	chr16	0.730986	5.69816	10.1791	1.57812e-07	2.52462e-06	HeterovsWT		ZMIZ1	57178	ENSG00000108175	chr10	0.708163	8.15768	15.0656	1.46304e-09	2.45519e-08	HomovsWT
AL162595.1	NA	NA	chr1	0.756962	3.88331	10.1777	1.58067e-07	2.52573e-06	HeterovsWT		AF117829.1	NA	NA	chr8	-2.60393	1.56662	-14.2554	2.87312e-09	4.08187e-08	HomovsWT
CLIP2	7461	ENSG00000106665	chr7	-0.619736	6.45345	-10.1524	1.6268e-07	2.59638e-06	HeterovsWT		UBR3	130507	ENSG00000144357	chr2	-0.731824	6.84233	-14.9646	1.58863e-09	2.61219e-08	HomovsWT
LINC01547	84536	ENSG00000183250	chr21	1.16755	3.08352	10.1492	1.63281e-07	2.60291e-06	HeterovsWT		AFDN	4301	ENSG00000130396	chr6	-10.8047	-1.41578	-16.2476	5.78314e-10	1.2047e-08	HomovsWT
NBPF17P	401967	ENSG00000179571	chr1	-0.58111	5.34662	-10.1387	1.65234e-07	2.63095e-06	HeterovsWT		AC112206.2	NA	NA	chr5	-7.25706	-1.71521	-16.4599	4.92729e-10	1.05723e-08	HomovsWT
KLF5	688	ENSG00000102554	chr13	2.25805	0.568001	10.131	1.66703e-07	2.65124e-06	HeterovsWT		GMFB	2764	ENSG00000197045	chr14	0.839021	6.10215	14.8594	1.73178e-09	2.79679e-08	HomovsWT
IL21R	50615	ENSG00000103522	chr16	-1.4564	1.98603	-10.1194	1.68912e-07	2.68323e-06	HeterovsWT		MAGEH1	28986	ENSG00000187601	chrX	-3.76646	1.05507	-14.3971	2.54713e-09	3.70001e-08	HomovsWT
CEP85L	387119	ENSG00000111860	chr6	-0.623189	4.64446	-10.1086	1.71004e-07	2.71311e-06	HeterovsWT		NUP50	10762	ENSG00000093000	chr22	0.72432	6.69953	14.8926	1.68518e-09	2.73128e-08	HomovsWT
PMPCB	9512	ENSG00000105819	chr7	0.619535	6.073	10.1077	1.71192e-07	2.71311e-06	HeterovsWT		RENBP	5973	ENSG00000102032	chrX	-1.48534	5.01984	-14.6587	2.04474e-09	3.14871e-08	HomovsWT
PITPNC1	26207	ENSG00000154217	chr17	-0.477017	6.8847	-10.1059	1.71536e-07	2.71538e-06	HeterovsWT		TET3	200424	ENSG00000187605	chr2	0.688657	7.78774	14.9763	1.57355e-09	2.59916e-08	HomovsWT
BCAP31	10134	ENSG00000185825	chrX	-0.818476	7.36566	-10.1042	1.71876e-07	2.7176e-06	HeterovsWT		NADK2	133686	ENSG00000152620	chr5	-0.906147	6.23124	-14.8034	1.81363e-09	2.89275e-08	HomovsWT
SMAD5	4090	ENSG00000113658	chr5	-0.56299	5.47275	-10.101	1.72496e-07	2.72423e-06	HeterovsWT		ABCA2	20	ENSG00000107331	chr9	1.30849	5.51746	14.6806	2.00791e-09	3.10254e-08	HomovsWT
AL691447.2	NA	NA	chr9	1.64487	1.3822	10.094	1.73896e-07	2.74316e-06	HeterovsWT		SNX1	6642	ENSG00000028528	chr15	-0.619447	7.5011	-14.9335	1.6296e-09	2.6629e-08	HomovsWT
GALNT8	26290	ENSG00000130035	chr12	-4.19788	-1.74519	-10.091	1.7449e-07	2.74933e-06	HeterovsWT		AC114763.1	NA	NA	chr2	-1.55141	3.02053	-14.2333	2.92798e-09	4.14248e-08	HomovsWT
SLC7A11	23657	ENSG00000151012	chr4	-0.726007	5.4094	-10.0843	1.75832e-07	2.76727e-06	HeterovsWT		ZBTB16	7704	ENSG00000109906	chr11	-3.68667	1.37945	-14.5687	2.20451e-09	3.3417e-08	HomovsWT
FBXL17	64839	ENSG00000145743	chr5	-0.6174	6.25975	-10.0828	1.76121e-07	2.76861e-06	HeterovsWT		CNST	163882	ENSG00000162852	chr1	-0.785783	6.28501	-14.7782	1.8518e-09	2.93233e-08	HomovsWT
CLEC2D	29121	ENSG00000069493	chr12	-0.931313	4.94859	-10.0752	1.77673e-07	2.78978e-06	HeterovsWT		DTWD1	56986	ENSG00000104047	chr15	-1.43268	5.84059	-14.6918	1.98917e-09	3.08754e-08	HomovsWT
NDUFAF2	91942	ENSG00000164182	chr5	-0.789379	4.88039	-10.0651	1.79729e-07	2.8188e-06	HeterovsWT		METTL4	64863	ENSG00000101574	chr18	0.831283	5.13982	14.5963	2.15418e-09	3.28573e-08	HomovsWT
SV2B	9899	ENSG00000185518	chr15	-1.32343	2.31327	-10.0617	1.80441e-07	2.82344e-06	HeterovsWT		HELLS	3070	ENSG00000119969	chr10	0.814234	6.1401	14.7604	1.87914e-09	2.96428e-08	HomovsWT
IFT122	55764	ENSG00000163913	chr3	0.544819	6.12113	10.0617	1.80432e-07	2.82344e-06	HeterovsWT		ZNF331	55422	ENSG00000130844	chr19	-2.5433	2.26812	-14.0972	3.2909e-09	4.53316e-08	HomovsWT
TNFRSF21	27242	ENSG00000146072	chr6	-0.499482	5.87095	-10.0606	1.80659e-07	2.8236e-06	HeterovsWT		LTBP1	4052	ENSG00000049323	chr2	-1.20785	4.27426	-14.459	2.41742e-09	3.57296e-08	HomovsWT
VIM	7431	ENSG00000026025	chr10	0.585239	6.94412	10.0498	1.82917e-07	2.85562e-06	HeterovsWT		SF3B1	23451	ENSG00000115524	chr2	-0.645378	9.51	-14.9787	1.5704e-09	2.59795e-08	HomovsWT
CPNE2	221184	ENSG00000140848	chr16	0.580726	5.93245	10.0409	1.84789e-07	2.88152e-06	HeterovsWT		ETHE1	23474	ENSG00000105755	chr19	0.825403	5.34685	14.6475	2.06395e-09	3.17469e-08	HomovsWT
BRPF3	27154	ENSG00000096070	chr6	0.584819	5.78203	10.028	1.87545e-07	2.92114e-06	HeterovsWT		SOWAHD	347454	ENSG00000187808	chrX	-1.97357	3.18926	-14.1756	3.07636e-09	4.3209e-08	HomovsWT
TNFRSF10A	8797	ENSG00000104689	chr8	3.7477	-0.841134	10.0259	1.8801e-07	2.92502e-06	HeterovsWT		PRR7	80758	ENSG00000131188	chr5	0.988723	5.72941	14.6939	1.98574e-09	3.08754e-08	HomovsWT
TNS1	7145	ENSG00000079308	chr2	1.53452	1.76201	10.0179	1.89752e-07	2.94626e-06	HeterovsWT		AP4E1	23431	ENSG00000081014	chr15	-0.752838	6.20699	-14.7411	1.90943e-09	3.00509e-08	HomovsWT
ZNF185	7739	ENSG00000147394	chrX	-0.769865	3.59744	-10.0176	1.89809e-07	2.94626e-06	HeterovsWT		CDC6	990	ENSG00000094804	chr17	0.754356	6.07986	14.6905	1.99137e-09	3.08754e-08	HomovsWT
BAHCC1	57597	ENSG00000266074	chr17	0.59475	8.48285	10.0154	1.90287e-07	2.95032e-06	HeterovsWT		ATP13A2	23400	ENSG00000159363	chr1	1.70445	4.69292	14.4668	2.40153e-09	3.55699e-08	HomovsWT
PHF6	84295	ENSG00000156531	chrX	-0.776199	6.66168	-10.0131	1.90802e-07	2.95156e-06	HeterovsWT		ZBTB33	10009	ENSG00000177485	chrX	-1.04749	6.13013	-14.7043	1.96876e-09	3.08061e-08	HomovsWT
MIB1	57534	ENSG00000101752	chr18	0.465197	7.95198	10.0136	1.90688e-07	2.95156e-06	HeterovsWT		C11orf95	NA	NA	chr11	1.01707	5.51413	14.5719	2.19858e-09	3.33643e-08	HomovsWT
HIST1H1D	NA	NA	chr6	0.800007	8.85145	10.0115	1.91134e-07	2.95333e-06	HeterovsWT		COPA	1314	ENSG00000122218	chr1	-0.646458	8.59643	-14.8698	1.71703e-09	2.77628e-08	HomovsWT
SLC37A3	84255	ENSG00000157800	chr7	-1.02803	2.96059	-10.0081	1.91902e-07	2.955e-06	HeterovsWT		APH1B	83464	ENSG00000138613	chr15	-0.875134	5.94502	-14.6135	2.12345e-09	3.25148e-08	HomovsWT
C2orf88	84281	ENSG00000187699	chr2	-0.861949	3.18026	-10.0071	1.92112e-07	2.955e-06	HeterovsWT		SCART1	619207	ENSG00000214279	chr10	-2.24957	2.88261	-14.027	3.49676e-09	4.7463e-08	HomovsWT
LINC01184	644873	ENSG00000245937	chr5	-0.713595	4.67571	-10.0091	1.91681e-07	2.955e-06	HeterovsWT		PLXND1	23129	ENSG00000004399	chr3	0.782674	8.32957	14.8481	1.74802e-09	2.81967e-08	HomovsWT
PHF11	51131	ENSG00000136147	chr13	-1.00862	4.94548	-10.0072	1.92094e-07	2.955e-06	HeterovsWT		AP002761.4	NA	NA	chr11	-1.85652	3.60861	-14.1462	3.15499e-09	4.39048e-08	HomovsWT
ITGB5	3693	ENSG00000082781	chr3	3.50614	0.185558	10.0027	1.93086e-07	2.96663e-06	HeterovsWT		WFDC1	58189	ENSG00000103175	chr16	-1.42806	3.64011	-14.1615	3.11385e-09	4.34212e-08	HomovsWT
ARHGEF39	84904	ENSG00000137135	chr9	0.802969	4.1064	9.99893	1.9393e-07	2.97622e-06	HeterovsWT		MPC1	51660	ENSG00000060762	chr6	-1.07392	5.55028	-14.5757	2.19155e-09	3.32948e-08	HomovsWT
TMEM266	123591	ENSG00000169758	chr15	-0.68091	4.52412	-9.99746	1.94258e-07	2.97789e-06	HeterovsWT		AL035071.2	NA	NA	chr20	0.916956	5.3513	14.531	2.27521e-09	3.41835e-08	HomovsWT
PITX1	5307	ENSG00000069011	chr5	-0.956524	4.23786	-9.99183	1.95523e-07	2.99053e-06	HeterovsWT		MGAT4A	11320	ENSG00000071073	chr2	0.830566	5.95523	14.6083	2.13253e-09	3.26171e-08	HomovsWT
MED28	80306	ENSG00000118579	chr4	0.501237	6.69797	9.99254	1.95362e-07	2.99053e-06	HeterovsWT		HERC5	51191	ENSG00000138646	chr4	-1.55089	4.40574	-14.279	2.81593e-09	4.02165e-08	HomovsWT
SERPINA1	5265	ENSG00000277377	chr14	-0.815435	4.33936	-9.984	1.97294e-07	3.01084e-06	HeterovsWT		NLRC3	197358	ENSG00000167984	chr16	0.903404	6.50901	14.6875	1.99643e-09	3.09184e-08	HomovsWT
IRAK2	3656	ENSG00000134070	chr3	-0.729751	4.48085	-9.9849	1.97091e-07	3.01084e-06	HeterovsWT		AGAP3	116988	ENSG00000133612	chr7	0.861289	7.42417	14.7743	1.85776e-09	2.93738e-08	HomovsWT
PSMG1	8624	ENSG00000183527	chr21	-0.497955	6.79726	-9.98301	1.97519e-07	3.0109e-06	HeterovsWT		ATAD2	29028	ENSG00000156802	chr8	0.696806	8.51508	14.8254	1.78091e-09	2.8528e-08	HomovsWT
NSMF	26012	ENSG00000165802	chr9	0.562338	6.71744	9.97944	1.98335e-07	3.01994e-06	HeterovsWT		ATP2A3	489	ENSG00000074370	chr17	0.925063	8.56452	14.8282	1.77682e-09	2.85258e-08	HomovsWT
PMS2P3	5387	ENSG00000127957	chr7	-0.742616	4.88852	-9.97639	1.99034e-07	3.02719e-06	HeterovsWT		ZNF592	9640	ENSG00000166716	chr15	-0.802379	6.97596	-14.711	1.95782e-09	3.06703e-08	HomovsWT
RHOH	399	ENSG00000168421	chr4	0.91898	3.62074	9.97189	2.00072e-07	3.02994e-06	HeterovsWT		C1GALT1C1	29071	ENSG00000171155	chrX	-1.12595	4.40292	-14.3488	2.65362e-09	3.83828e-08	HomovsWT
CRAT	1384	ENSG00000095321	chr9	0.664788	4.9768	9.97173	2.00107e-07	3.02994e-06	HeterovsWT		TMEM158	25907	ENSG00000249992	chr3	-1.23893	4.53999	-14.3691	2.60813e-09	3.77651e-08	HomovsWT
PIGA	5277	ENSG00000165195	chrX	-0.682456	4.69341	-9.97319	1.99771e-07	3.02994e-06	HeterovsWT		NAPB	63908	ENSG00000125814	chr20	-0.872662	5.35921	-14.4867	2.36156e-09	3.51697e-08	HomovsWT
BNC2	54796	ENSG00000173068	chr9	-0.791689	5.81504	-9.97285	1.99848e-07	3.02994e-06	HeterovsWT		AC068875.1	NA	NA	chr15	-7.60933	-0.423419	-15.9347	7.34871e-10	1.45921e-08	HomovsWT
TMEM185A	84548	ENSG00000269556	chrX	-0.725908	4.15365	-9.9622	2.02322e-07	3.06006e-06	HeterovsWT		ZNF846	162993	ENSG00000196605	chr19	-2.84469	1.28926	-13.9917	3.60564e-09	4.84973e-08	HomovsWT
PPP2R2D	55844	ENSG00000175470	chr10	0.488695	6.72287	9.95835	2.03223e-07	3.07027e-06	HeterovsWT		CCDC88C	440193	ENSG00000015133	chr14	0.647732	6.91589	14.6935	1.98643e-09	3.08754e-08	HomovsWT
AP000943.2	NA	NA	chr11	-1.99813	0.957295	-9.95681	2.03586e-07	3.07234e-06	HeterovsWT		VPS13C	54832	ENSG00000129003	chr15	-0.866071	8.17423	-14.7778	1.85241e-09	2.93233e-08	HomovsWT
R3HDM4	91300	ENSG00000198858	chr19	-0.658399	5.54736	-9.95437	2.04161e-07	3.07508e-06	HeterovsWT		TBXA2R	6915	ENSG00000006638	chr19	-9.53318	1.7828	-15.787	8.24125e-10	1.58321e-08	HomovsWT
ELF4	2000	ENSG00000102034	chrX	-0.591388	6.36632	-9.95411	2.04221e-07	3.07508e-06	HeterovsWT		TRMT2B	79979	ENSG00000188917	chrX	-0.962902	5.20503	-14.4698	2.39546e-09	3.55187e-08	HomovsWT
HBEGF	1839	ENSG00000113070	chr5	-1.3471	3.43662	-9.95161	2.04813e-07	3.08059e-06	HeterovsWT		MAP10	54627	ENSG00000212916	chr1	-1.19462	4.18859	-14.2258	2.94689e-09	4.16057e-08	HomovsWT
GRIN1	2902	ENSG00000176884	chr9	1.99227	0.577149	9.94836	2.05583e-07	3.08874e-06	HeterovsWT		PI4K2B	55300	ENSG00000038210	chr4	0.73621	7.56794	14.7256	1.93412e-09	3.03339e-08	HomovsWT
AC136431.1	NA	NA	chr16	-2.17426	-0.208358	-9.94293	2.0688e-07	3.10137e-06	HeterovsWT		RNF113A	7737	ENSG00000125352	chrX	-1.28778	3.60151	-14.1638	3.10753e-09	4.33776e-08	HomovsWT
SLC12A9	56996	ENSG00000146828	chr7	-0.916629	6.84978	-9.94386	2.06655e-07	3.10137e-06	HeterovsWT		ZDHHC21	340481	ENSG00000175893	chr9	-7.49339	1.29066	-15.6339	9.2902e-10	1.72376e-08	HomovsWT
TSC1	7248	ENSG00000165699	chr9	0.651176	6.15282	9.93965	2.07664e-07	3.10815e-06	HeterovsWT		AMMECR1	9949	ENSG00000101935	chrX	-0.797963	6.20895	-14.5904	2.16478e-09	3.2925e-08	HomovsWT
CDC20	991	ENSG00000117399	chr1	0.492434	7.54505	9.93913	2.07789e-07	3.10815e-06	HeterovsWT		SIL1	64374	ENSG00000120725	chr5	-0.854172	5.27648	-14.3935	2.55488e-09	3.7073e-08	HomovsWT
SLC9A7	84679	ENSG00000065923	chrX	-2.54373	-0.172057	-9.93599	2.08546e-07	3.11603e-06	HeterovsWT		MAP2K5	5607	ENSG00000137764	chr15	-0.977922	6.46282	-14.56	2.22058e-09	3.3511e-08	HomovsWT
DNAJB5	25822	ENSG00000137094	chr9	1.25881	2.36059	9.92895	2.10254e-07	3.1381e-06	HeterovsWT		NSMAF	8439	ENSG00000035681	chr8	-0.798164	8.13049	-14.729	1.9288e-09	3.03206e-08	HomovsWT
CBWD2	150472	ENSG00000136682	chr2	-0.615545	6.56619	-9.92474	2.11281e-07	3.14723e-06	HeterovsWT		SCD5	79966	ENSG00000145284	chr4	0.779145	6.02395	14.515	2.306e-09	3.45315e-08	HomovsWT
MYO18A	399687	ENSG00000196535	chr17	0.531489	6.92003	9.92455	2.11329e-07	3.14723e-06	HeterovsWT		SLC1A3	6507	ENSG00000079215	chr5	-1.85276	3.30135	-13.9914	3.60641e-09	4.84973e-08	HomovsWT
GNAQ	2776	ENSG00000156052	chr9	-0.635935	7.71948	-9.92257	2.11813e-07	3.15098e-06	HeterovsWT		SEMA4D	10507	ENSG00000187764	chr9	0.715286	7.72435	14.6757	2.01608e-09	3.11164e-08	HomovsWT
AURKB	9212	ENSG00000178999	chr17	0.570666	6.28838	9.92162	2.12046e-07	3.15099e-06	HeterovsWT		ZNF462	58499	ENSG00000148143	chr9	6.26814	0.825914	15.5236	1.01339e-09	1.84009e-08	HomovsWT
DAGLB	221955	ENSG00000164535	chr7	0.591513	6.81352	9.91944	2.12584e-07	3.15553e-06	HeterovsWT		NEIL1	79661	ENSG00000140398	chr15	-1.34383	4.17248	-14.1657	3.10245e-09	4.33611e-08	HomovsWT
MEPCE	56257	ENSG00000146834	chr7	-0.625422	6.61085	-9.91601	2.13429e-07	3.16462e-06	HeterovsWT		PXN	5829	ENSG00000089159	chr12	0.918759	4.59364	14.2845	2.80273e-09	4.01124e-08	HomovsWT
SIRT2	22933	ENSG00000283100	chr19	-0.556365	6.18112	-9.91169	2.145e-07	3.17704e-06	HeterovsWT		RECQL4	9401	ENSG00000160957	chr8	1.11374	7.42119	14.6422	2.07318e-09	3.18529e-08	HomovsWT
PDE9A	5152	ENSG00000160191	chr21	0.586822	5.29237	9.90326	2.16608e-07	3.20476e-06	HeterovsWT		PBX4	80714	ENSG00000105717	chr19	-5.797	-1.40801	-15.8058	8.12116e-10	1.56456e-08	HomovsWT
IMMP2L	83943	ENSG00000184903	chr7	-0.573966	6.95131	-9.9018	2.16977e-07	3.20672e-06	HeterovsWT		SEMA6A	57556	ENSG00000092421	chr5	-1.49511	2.67988	-13.9197	3.83876e-09	5.09161e-08	HomovsWT
LINC02693	339263	ENSG00000212719	chr17	-1.77354	0.854289	-9.89773	2.18005e-07	3.21842e-06	HeterovsWT		NOS3	4846	ENSG00000164867	chr7	-2.1604	1.9663	-13.8429	4.10539e-09	5.377e-08	HomovsWT
C18orf25	147339	ENSG00000152242	chr18	0.521505	6.60655	9.89588	2.18472e-07	3.22181e-06	HeterovsWT		OLMALINC	90271	ENSG00000235823	chr10	-1.05465	4.85955	-14.2924	2.78403e-09	3.99514e-08	HomovsWT
JPT2	90861	ENSG00000206053	chr16	0.513854	7.19691	9.8899	2.19995e-07	3.24075e-06	HeterovsWT		MTUS1	57509	ENSG00000129422	chr8	-4.65372	0.422	-14.6949	1.98411e-09	3.08754e-08	HomovsWT
MRPS23	51649	ENSG00000181610	chr17	-0.674129	5.78421	-9.88369	2.21588e-07	3.26068e-06	HeterovsWT		LSM14B	149986	ENSG00000149657	chr20	0.686776	6.75952	14.5662	2.20908e-09	3.3449e-08	HomovsWT
TESPA1	9840	ENSG00000135426	chr12	-1.7967	1.46721	-9.85908	2.28026e-07	3.35178e-06	HeterovsWT		MED22	6837	ENSG00000281022	chr9	0.983664	5.97812	14.4788	2.37722e-09	3.53254e-08	HomovsWT
NAA20	51126	ENSG00000173418	chr20	-0.587096	6.04171	-9.85692	2.28599e-07	3.35658e-06	HeterovsWT		LINC00598	646982	ENSG00000215483	chr13	-2.00608	2.20419	-13.8267	4.16383e-09	5.42737e-08	HomovsWT
TMEM154	201799	ENSG00000170006	chr4	-0.66552	5.99118	-9.8552	2.29057e-07	3.35967e-06	HeterovsWT		FAM81A	145773	ENSG00000157470	chr15	-1.28783	5.29274	-14.3371	2.68003e-09	3.86824e-08	HomovsWT
ADTRP	84830	ENSG00000111863	chr6	2.1952	1.16633	9.8431	2.3231e-07	3.40371e-06	HeterovsWT		AC087632.2	NA	NA	chr15	0.809599	5.35632	14.3334	2.6884e-09	3.8762e-08	HomovsWT
SLC37A1	54020	ENSG00000160190	chr21	-0.628831	5.80523	-9.84018	2.33102e-07	3.41163e-06	HeterovsWT		RBBP7	5931	ENSG00000102054	chrX	-0.637271	8.00852	-14.6304	2.09357e-09	3.21298e-08	HomovsWT
CYLD	1540	ENSG00000083799	chr16	-0.812911	4.36871	-9.83324	2.34997e-07	3.43197e-06	HeterovsWT		AC106741.1	NA	NA	chr16	-9.46134	-0.57271	-15.5312	1.00734e-09	1.83668e-08	HomovsWT
EBF1	1879	ENSG00000164330	chr5	-0.740906	4.99091	-9.83376	2.34855e-07	3.43197e-06	HeterovsWT		ARV1	64801	ENSG00000173409	chr1	-0.902969	5.02779	-14.249	2.88899e-09	4.10013e-08	HomovsWT
LMAN2L	81562	ENSG00000114988	chr2	0.701078	4.95703	9.82227	2.38026e-07	3.47247e-06	HeterovsWT		COX11	1353	ENSG00000166260	chr17	-0.841062	5.513	-14.3281	2.70068e-09	3.88566e-08	HomovsWT
MAPKAPK3	7867	ENSG00000114738	chr3	0.465481	8.7064	9.81916	2.38893e-07	3.48138e-06	HeterovsWT		FBXL17	64839	ENSG00000145743	chr5	-0.905624	6.25975	-14.4462	2.44358e-09	3.59964e-08	HomovsWT
LINC01169	102723165	ENSG00000259471	chr15	-0.636063	4.78947	-9.81558	2.39894e-07	3.49222e-06	HeterovsWT		FASN	2194	ENSG00000169710	chr17	1.13398	10.3905	14.6916	1.9895e-09	3.08754e-08	HomovsWT
P4HTM	54681	ENSG00000178467	chr3	3.34329	-0.302702	9.81337	2.40515e-07	3.49751e-06	HeterovsWT		VOPP1	81552	ENSG00000154978	chr7	0.732222	6.05765	14.4074	2.52504e-09	3.68369e-08	HomovsWT
SIAE	54414	ENSG00000110013	chr11	-0.656327	4.15086	-9.8062	2.4254e-07	3.52318e-06	HeterovsWT		CRYL1	51084	ENSG00000165475	chr13	-1.01948	4.54087	-14.1377	3.1782e-09	4.40473e-08	HomovsWT
NMRK1	54981	ENSG00000106733	chr9	-1.02092	3.63222	-9.80464	2.42982e-07	3.52583e-06	HeterovsWT		VMA21	203547	ENSG00000160131	chrX	-0.907701	7.5504	-14.5514	2.23659e-09	3.37152e-08	HomovsWT
NEU3	10825	ENSG00000162139	chr11	0.502117	6.87823	9.80141	2.43901e-07	3.53539e-06	HeterovsWT		BRPF1	7862	ENSG00000156983	chr3	0.697093	6.39257	14.4301	2.47693e-09	3.62908e-08	HomovsWT
CTNNA3	29119	ENSG00000183230	chr10	1.80484	0.0558048	9.79383	2.46076e-07	3.56312e-06	HeterovsWT		PLEC	5339	ENSG00000178209	chr8	1.26468	9.38266	14.6201	2.11171e-09	3.23716e-08	HomovsWT
BSG	682	ENSG00000172270	chr19	-0.568809	8.29661	-9.79155	2.46733e-07	3.56882e-06	HeterovsWT		SYNJ2	8871	ENSG00000078269	chr6	-0.785176	6.55475	-14.4142	2.51056e-09	3.6665e-08	HomovsWT
CLCN6	1185	ENSG00000011021	chr1	0.497015	6.38935	9.79063	2.46999e-07	3.56887e-06	HeterovsWT		BLNK	29760	ENSG00000095585	chr10	-5.11986	0.0625075	-14.2759	2.82327e-09	4.0279e-08	HomovsWT
AC019117.3	NA	NA	chr7	2.06116	2.57492	9.78174	2.49584e-07	3.59959e-06	HeterovsWT		RPP40	10799	ENSG00000124787	chr6	-1.47427	3.86969	-13.9585	3.71108e-09	4.96189e-08	HomovsWT
BACH2	60468	ENSG00000112182	chr6	-1.14134	2.99485	-9.7815	2.49655e-07	3.59959e-06	HeterovsWT		ZNF658	26149	ENSG00000274349	chr9	-1.90805	2.03238	-13.7064	4.62943e-09	5.94534e-08	HomovsWT
CLCN5	1184	ENSG00000171365	chrX	-0.675127	6.35666	-9.76742	2.53808e-07	3.65559e-06	HeterovsWT		AC025171.1	NA	NA	chr5	1.11903	4.99688	14.1939	3.02839e-09	4.26676e-08	HomovsWT
TMEM120A	83862	ENSG00000189077	chr7	-0.875634	4.38919	-9.76257	2.55258e-07	3.67258e-06	HeterovsWT		WDR62	284403	ENSG00000075702	chr19	0.802214	6.90093	14.4589	2.41757e-09	3.57296e-08	HomovsWT
IL6R	3570	ENSG00000160712	chr1	0.409584	8.07295	9.76035	2.55925e-07	3.67828e-06	HeterovsWT		NSMF	26012	ENSG00000165802	chr9	0.804307	6.71744	14.4258	2.48604e-09	3.6346e-08	HomovsWT
CLPX	10845	ENSG00000166855	chr15	-0.450726	6.7915	-9.75629	2.57146e-07	3.69192e-06	HeterovsWT		SLC38A6	145389	ENSG00000139974	chr14	-1.13353	4.29468	-14.0256	3.50114e-09	4.7463e-08	HomovsWT
ARFGAP2	84364	ENSG00000149182	chr11	0.595398	6.99439	9.75458	2.57663e-07	3.69544e-06	HeterovsWT		FCGR2A	2212	ENSG00000143226	chr1	-1.33127	4.02058	-13.9521	3.73193e-09	4.97419e-08	HomovsWT
PDE8A	5151	ENSG00000073417	chr15	-0.478826	6.55224	-9.7482	2.59602e-07	3.71932e-06	HeterovsWT		AC097534.1	NA	NA	chr4	1.09599	4.44939	14.0919	3.30616e-09	4.53579e-08	HomovsWT
LIMS2	55679	ENSG00000072163	chr2	2.68383	0.403237	9.74557	2.60405e-07	3.72689e-06	HeterovsWT		RASA3	22821	ENSG00000280477	chr13	0.679733	8.60181	14.5493	2.24054e-09	3.37372e-08	HomovsWT
PPP1R2	5504	ENSG00000184203	chr3	-0.663225	5.4418	-9.74105	2.61793e-07	3.74282e-06	HeterovsWT		FIBCD1	84929	ENSG00000130720	chr9	-3.59171	1.42564	-13.8415	4.11044e-09	5.37842e-08	HomovsWT
CHST10	9486	ENSG00000115526	chr2	0.637125	4.92589	9.73699	2.63045e-07	3.75676e-06	HeterovsWT		H2AFX	NA	NA	chr11	0.984738	7.56981	14.4873	2.36044e-09	3.51697e-08	HomovsWT
TEX30	93081	ENSG00000151287	chr13	0.821007	3.43625	9.73382	2.64028e-07	3.76684e-06	HeterovsWT		LINC00906	148145	ENSG00000267339	chr19	-0.828629	6.72378	-14.4385	2.45951e-09	3.61136e-08	HomovsWT
ZNF692	55657	ENSG00000171163	chr1	0.551357	5.71885	9.73179	2.64659e-07	3.77187e-06	HeterovsWT		SLC25A13	10165	ENSG00000004864	chr7	-0.71864	7.57237	-14.496	2.34319e-09	3.50112e-08	HomovsWT
ZNF557	79230	ENSG00000130544	chr19	-0.678372	4.74976	-9.72774	2.65923e-07	3.78592e-06	HeterovsWT		ARHGAP25	9938	ENSG00000163219	chr2	0.765031	5.74571	14.2816	2.80967e-09	4.01694e-08	HomovsWT
TPCN1	53373	ENSG00000186815	chr12	0.592425	6.47809	9.72507	2.66758e-07	3.78986e-06	HeterovsWT		LPCAT1	79888	ENSG00000153395	chr5	0.789982	8.60049	14.5293	2.27852e-09	3.41954e-08	HomovsWT
ARHGAP23	57636	ENSG00000273780	chr17	0.633038	6.38383	9.72517	2.66728e-07	3.78986e-06	HeterovsWT		TMEM67	91147	ENSG00000164953	chr8	-1.24611	3.63348	-13.873	3.9983e-09	5.2621e-08	HomovsWT
EPS15L1	58513	ENSG00000127527	chr19	-0.449672	6.40369	-9.72162	2.67846e-07	3.80134e-06	HeterovsWT		CCND3	896	ENSG00000112576	chr6	0.888922	7.32098	14.4438	2.4485e-09	3.60299e-08	HomovsWT
SDK1	221935	ENSG00000146555	chr7	-0.476874	7.30081	-9.71643	2.69486e-07	3.82063e-06	HeterovsWT		MLLT6	4302	ENSG00000275851	chr17	0.769024	7.50676	14.4392	2.4581e-09	3.61136e-08	HomovsWT
MAPK11	5600	ENSG00000185386	chr22	-1.71614	1.87536	-9.69957	2.74897e-07	3.89328e-06	HeterovsWT		RAPGEF4-AS1	91149	ENSG00000228016	chr2	-3.69475	1.18871	-13.762	4.40763e-09	5.70137e-08	HomovsWT
RNF14	9604	ENSG00000013561	chr5	-0.735516	4.37219	-9.69868	2.75184e-07	3.89328e-06	HeterovsWT		FOXP2	93986	ENSG00000128573	chr7	7.13673	-0.495502	15.4427	1.08053e-09	1.93611e-08	HomovsWT
ACADVL	37	ENSG00000072778	chr17	0.500662	7.99361	9.69512	2.76342e-07	3.90559e-06	HeterovsWT		EPHA1	2041	ENSG00000146904	chr7	1.75407	3.61708	13.8055	4.24227e-09	5.50846e-08	HomovsWT
SLC9A9	285195	ENSG00000181804	chr3	-1.05743	2.58656	-9.67187	2.84036e-07	4.01016e-06	HeterovsWT		MYH10	4628	ENSG00000133026	chr17	-2.43182	1.98225	-13.579	5.18384e-09	6.53611e-08	HomovsWT
AC011997.1	NA	NA	chr2	-0.909568	3.78303	-9.66843	2.85192e-07	4.02086e-06	HeterovsWT		COL4A1	1282	ENSG00000187498	chr13	-4.8663	0.398316	-14.0153	3.53245e-09	4.78342e-08	HomovsWT
PAK1	5058	ENSG00000149269	chr11	-0.498502	5.97291	-9.66786	2.85386e-07	4.02086e-06	HeterovsWT		DAGLB	221955	ENSG00000164535	chr7	0.843746	6.81352	14.2973	2.77234e-09	3.98454e-08	HomovsWT
RPS6KA3	6197	ENSG00000177189	chrX	-0.658909	7.37616	-9.66029	2.87953e-07	4.05282e-06	HeterovsWT		LYSMD2	256586	ENSG00000140280	chr15	-1.27386	5.37189	-14.088	3.31714e-09	4.54625e-08	HomovsWT
HTATSF1	27336	ENSG00000102241	chrX	-0.817171	6.39705	-9.65742	2.88929e-07	4.06236e-06	HeterovsWT		INKA2	55924	ENSG00000197852	chr1	0.915717	4.58737	13.9932	3.60078e-09	4.84973e-08	HomovsWT
MCTP1	79772	ENSG00000175471	chr5	-0.566373	7.48147	-9.65598	2.89424e-07	4.0651e-06	HeterovsWT		ARHGAP24	83478	ENSG00000138639	chr4	-1.53233	3.66397	-13.7498	4.45531e-09	5.74117e-08	HomovsWT
ZNF530	348327	ENSG00000183647	chr19	1.49913	2.34601	9.65281	2.90512e-07	4.07618e-06	HeterovsWT		CDK16	5127	ENSG00000102225	chrX	-0.832679	6.69329	-14.2581	2.86665e-09	4.07695e-08	HomovsWT
SLAMF8	56833	ENSG00000158714	chr1	1.76945	-0.3872	9.64894	2.91845e-07	4.09064e-06	HeterovsWT		TATDN3	128387	ENSG00000203705	chr1	-0.969279	4.66853	-13.9374	3.77996e-09	5.02834e-08	HomovsWT
CDT1	81620	ENSG00000167513	chr16	0.713788	7.46249	9.63896	2.95318e-07	4.13506e-06	HeterovsWT		INCENP	3619	ENSG00000149503	chr11	0.68548	7.26477	14.2914	2.78632e-09	3.99514e-08	HomovsWT
RACGAP1	29127	ENSG00000161800	chr12	0.458207	7.16813	9.63521	2.96631e-07	4.14917e-06	HeterovsWT		EBF4	57593	ENSG00000088881	chr20	2.56132	2.82282	13.4974	5.57591e-09	6.85978e-08	HomovsWT
USP13	8975	ENSG00000058056	chr3	0.481939	6.82531	9.61874	3.02485e-07	4.2267e-06	HeterovsWT		POM121	9883	ENSG00000196313	chr7	-0.69386	7.8373	-14.3386	2.67656e-09	3.86735e-08	HomovsWT
OTOA	146183	ENSG00000155719	chr16	-2.48561	0.131675	-9.60829	3.06263e-07	4.26632e-06	HeterovsWT		MYO5A	4644	ENSG00000197535	chr15	-1.1378	5.73823	-14.1271	3.20725e-09	4.44046e-08	HomovsWT
SAT1	6303	ENSG00000130066	chrX	-0.995871	4.11957	-9.60864	3.06136e-07	4.26632e-06	HeterovsWT		FTSJ1	24140	ENSG00000068438	chrX	-0.899248	6.11442	-14.1663	3.1011e-09	4.33611e-08	HomovsWT
PIP5K1B	8395	ENSG00000107242	chr9	-0.757818	4.49197	-9.60982	3.05709e-07	4.26632e-06	HeterovsWT		ZFAND4	93550	ENSG00000172671	chr10	-2.07499	2.4739	-13.5072	5.52698e-09	6.84298e-08	HomovsWT
SDCBP	6386	ENSG00000137575	chr8	-1.46058	3.31054	-9.6067	3.06842e-07	4.27e-06	HeterovsWT		DNAJA1	3301	ENSG00000086061	chr9	1.07913	6.35262	14.1827	3.05772e-09	4.29917e-08	HomovsWT
ZSCAN21	7589	ENSG00000166529	chr7	-0.92203	3.02526	-9.59954	3.09466e-07	4.29771e-06	HeterovsWT		TCEA3	6920	ENSG00000204219	chr1	-3.12736	1.85698	-13.5176	5.4761e-09	6.80479e-08	HomovsWT
HSP90AB1	3326	ENSG00000096384	chr6	0.368888	11.0857	9.59954	3.09465e-07	4.29771e-06	HeterovsWT		CES3	23491	ENSG00000172828	chr16	-1.40855	3.52209	-13.6998	4.65625e-09	5.96722e-08	HomovsWT
SLC44A2	57153	ENSG00000129353	chr19	-0.687863	6.30018	-9.59602	3.10764e-07	4.31134e-06	HeterovsWT		GBA	2629	ENSG00000177628	chr1	-1.01829	5.2137	-13.9764	3.6536e-09	4.89864e-08	HomovsWT
AC100808.1	NA	NA	chr17	-1.80966	2.15911	-9.59259	3.12032e-07	4.32133e-06	HeterovsWT		SLC22A15	55356	ENSG00000163393	chr1	-0.775593	6.51536	-14.192	3.03343e-09	4.26943e-08	HomovsWT
POLR2A	5430	ENSG00000181222	chr17	0.411039	7.82645	9.59235	3.12121e-07	4.32133e-06	HeterovsWT		PDE4B	5142	ENSG00000184588	chr1	-1.41178	4.83582	-13.9531	3.72859e-09	4.97419e-08	HomovsWT
ACTN2	88	ENSG00000077522	chr1	5.39707	-3.27256	9.57489	3.18677e-07	4.40554e-06	HeterovsWT		NMNAT2	23057	ENSG00000157064	chr1	-5.48253	0.244352	-14.8412	1.75794e-09	2.82895e-08	HomovsWT
STMN1	3925	ENSG00000117632	chr1	0.43172	9.52398	9.57443	3.18852e-07	4.40554e-06	HeterovsWT		PDE4DIP	9659	ENSG00000178104	chr1	-0.875689	4.98219	-13.9251	3.82068e-09	5.07755e-08	HomovsWT
SAMSN1	64092	ENSG00000155307	chr21	-1.38812	3.21304	-9.57143	3.19995e-07	4.41684e-06	HeterovsWT		CRK	1398	ENSG00000167193	chr17	0.733946	6.27215	14.1414	3.16806e-09	4.40286e-08	HomovsWT
SPAG1	6674	ENSG00000104450	chr8	-0.80561	3.88664	-9.56631	3.21954e-07	4.43937e-06	HeterovsWT		PLEKHB2	55041	ENSG00000115762	chr2	-0.672727	7.94479	-14.2905	2.78854e-09	3.99514e-08	HomovsWT
ZNF646	9726	ENSG00000167395	chr16	0.45039	6.45877	9.56509	3.22421e-07	4.4413e-06	HeterovsWT		PHF20	51230	ENSG00000025293	chr20	0.642415	7.42966	14.2621	2.85679e-09	4.07145e-08	HomovsWT
PBX2	5089	ENSG00000232005	chr6	0.495972	6.4785	9.55556	3.26106e-07	4.48536e-06	HeterovsWT		ZNF337-AS1	102724826	ENSG00000213742	chr20	-1.31582	4.20445	-13.7584	4.42161e-09	5.71402e-08	HomovsWT
KMT2E	55904	ENSG00000005483	chr7	0.620141	6.90624	9.55512	3.2628e-07	4.48536e-06	HeterovsWT		IGF2BP3	10643	ENSG00000136231	chr7	0.623325	7.1999	14.2228	2.95442e-09	4.16686e-08	HomovsWT
NCKIPSD	51517	ENSG00000213672	chr3	0.792946	5.44023	9.55402	3.26708e-07	4.4867e-06	HeterovsWT		APCDD1	147495	ENSG00000154856	chr18	-3.13334	1.20696	-13.4977	5.57418e-09	6.85978e-08	HomovsWT
RAB3D	9545	ENSG00000105514	chr19	-0.882074	4.18611	-9.55199	3.275e-07	4.49304e-06	HeterovsWT		ARFGAP2	84364	ENSG00000149182	chr11	0.856322	6.99439	14.1688	3.09422e-09	4.33611e-08	HomovsWT
PLD4	122618	ENSG00000166428	chr14	2.18389	0.333257	9.54805	3.29042e-07	4.50508e-06	HeterovsWT		PIAS1	8554	ENSG00000033800	chr15	-0.866531	6.56874	-14.1222	3.22075e-09	4.44968e-08	HomovsWT
CARM1	10498	ENSG00000142453	chr19	-0.563367	6.37705	-9.54854	3.28853e-07	4.50508e-06	HeterovsWT		CCM2	83605	ENSG00000136280	chr7	0.751714	6.55091	14.1211	3.22374e-09	4.44968e-08	HomovsWT
POP1	10940	ENSG00000104356	chr8	0.651851	5.16809	9.54476	3.3034e-07	4.5183e-06	HeterovsWT		SPNS2	124976	ENSG00000183018	chr17	1.01935	4.80173	13.8911	3.93582e-09	5.20003e-08	HomovsWT
ABHD17B	51104	ENSG00000107362	chr9	-0.554905	5.60295	-9.54376	3.30733e-07	4.51913e-06	HeterovsWT		RFX3	5991	ENSG00000080298	chr9	-1.01535	5.68424	-14.004	3.56719e-09	4.81606e-08	HomovsWT
MECP2	4204	ENSG00000169057	chrX	-0.51471	6.67753	-9.54196	3.31445e-07	4.52431e-06	HeterovsWT		MARCO	8685	ENSG00000019169	chr2	-5.49412	0.611348	-14.3987	2.54361e-09	3.69886e-08	HomovsWT
NOS3	4846	ENSG00000164867	chr7	-1.22503	1.9663	-9.5318	3.35492e-07	4.57495e-06	HeterovsWT		ACVRL1	94	ENSG00000139567	chr12	-6.76596	-1.43744	-15.164	1.35095e-09	2.29358e-08	HomovsWT
INSM1	3642	ENSG00000173404	chr20	-1.38636	-0.78002	-9.528	3.37019e-07	4.59117e-06	HeterovsWT		CMTR1	23070	ENSG00000137200	chr6	0.693524	6.74347	14.1394	3.17361e-09	4.40286e-08	HomovsWT
COL19A1	1310	ENSG00000082293	chr6	-2.09685	-0.568631	-9.52632	3.37701e-07	4.59584e-06	HeterovsWT		PPM1G	5496	ENSG00000115241	chr2	0.748377	7.83883	14.2265	2.94504e-09	4.16057e-08	HomovsWT
IL1RN	3557	ENSG00000136689	chr2	-1.35853	2.70295	-9.51838	3.40922e-07	4.63504e-06	HeterovsWT		STRN4	29888	ENSG00000090372	chr19	0.610758	7.00779	14.1655	3.10315e-09	4.33611e-08	HomovsWT
DNAJC12	56521	ENSG00000108176	chr10	-1.9088	-1.17951	-9.50824	3.45086e-07	4.65093e-06	HeterovsWT		RRAGB	10325	ENSG00000083750	chrX	-1.13143	4.22972	-13.7277	4.54301e-09	5.84864e-08	HomovsWT
TAFA3	284467	ENSG00000184599	chr1	2.97219	-0.448109	9.5112	3.43865e-07	4.65093e-06	HeterovsWT		FAM189B	10712	ENSG00000160767	chr1	-7.56305	1.77043	-14.4544	2.42676e-09	3.58264e-08	HomovsWT
STAR	6770	ENSG00000147465	chr8	0.608995	5.31661	9.51231	3.43409e-07	4.65093e-06	HeterovsWT		LINC00877	285286	ENSG00000241163	chr3	1.48531	2.94133	13.5151	5.48819e-09	6.81359e-08	HomovsWT
SDHAP1	255812	ENSG00000185485	chr3	-0.6204	5.43431	-9.51136	3.43801e-07	4.65093e-06	HeterovsWT		SKA2	348235	ENSG00000182628	chr17	0.891439	4.46896	13.7536	4.44055e-09	5.72759e-08	HomovsWT
SOAT1	6646	ENSG00000057252	chr1	-0.456185	6.90846	-9.51191	3.43574e-07	4.65093e-06	HeterovsWT		CCDC93	54520	ENSG00000125633	chr2	-0.690921	6.27325	-14.0306	3.48605e-09	4.7463e-08	HomovsWT
KIF11	3832	ENSG00000138160	chr10	0.522023	7.53866	9.50803	3.45173e-07	4.65093e-06	HeterovsWT		LINC00237	105372556	ENSG00000225127	chr20	-6.45874	-1.90739	-15.2453	1.26521e-09	2.18348e-08	HomovsWT
MAN2B1	4125	ENSG00000104774	chr19	-0.516317	7.69803	-9.50869	3.449e-07	4.65093e-06	HeterovsWT		PILRA	29992	ENSG00000085514	chr7	-1.55977	3.11832	-13.5	5.56287e-09	6.85978e-08	HomovsWT
NBAS	51594	ENSG00000151779	chr2	0.382211	7.84812	9.50956	3.44541e-07	4.65093e-06	HeterovsWT		SERINC5	256987	ENSG00000164300	chr5	-0.953527	5.0943	-13.8245	4.17197e-09	5.43277e-08	HomovsWT
KPNA2	3838	ENSG00000182481	chr17	0.399389	8.25393	9.51292	3.43156e-07	4.65093e-06	HeterovsWT		APBA2	321	ENSG00000034053	chr15	-0.923977	5.78371	-13.889	3.94283e-09	5.20422e-08	HomovsWT
PIAS2	9063	ENSG00000078043	chr18	0.753104	5.91549	9.50431	3.46713e-07	4.66705e-06	HeterovsWT		NPTN	27020	ENSG00000156642	chr15	-0.768907	6.50721	-14.0383	3.46285e-09	4.72687e-08	HomovsWT
SUGCT	79783	ENSG00000175600	chr7	0.656477	4.24085	9.49993	3.48539e-07	4.68699e-06	HeterovsWT		ODF2L	57489	ENSG00000122417	chr1	1.0152	5.01892	13.8172	4.19882e-09	5.45727e-08	HomovsWT
ACAA2	10449	ENSG00000167315	chr18	0.648816	6.34675	9.49793	3.49377e-07	4.69362e-06	HeterovsWT		CASP8	841	ENSG00000064012	chr2	0.774626	5.47547	13.9036	3.89296e-09	5.15342e-08	HomovsWT
G6PD	2539	ENSG00000160211	chrX	-0.708459	5.85052	-9.49471	3.50729e-07	4.70711e-06	HeterovsWT		RAC1	5879	ENSG00000136238	chr7	0.67589	8.11718	14.1728	3.08364e-09	4.32665e-08	HomovsWT
ITGAD	3681	ENSG00000156886	chr16	2.87711	0.861561	9.49179	3.51958e-07	4.71895e-06	HeterovsWT		ARL4C	10123	ENSG00000188042	chr2	-7.55901	-2.88186	-14.9956	1.54885e-09	2.56855e-08	HomovsWT
GTSE1	51512	ENSG00000075218	chr22	0.559284	5.56904	9.48454	3.55032e-07	4.75547e-06	HeterovsWT		HEATR1	55127	ENSG00000119285	chr1	-0.754377	8.02024	-14.1533	3.13587e-09	4.36835e-08	HomovsWT
CDK5RAP2	55755	ENSG00000136861	chr9	0.457432	7.81034	9.48177	3.56213e-07	4.76659e-06	HeterovsWT		ZADH2	284273	ENSG00000180011	chr18	0.598338	7.13552	14.0938	3.30059e-09	4.53579e-08	HomovsWT
DARS2	55157	ENSG00000117593	chr1	0.478357	7.33529	9.47863	3.57557e-07	4.77986e-06	HeterovsWT		LINC01963	150967	ENSG00000260804	chr2	2.55983	2.14102	13.3198	6.54405e-09	7.8656e-08	HomovsWT
SLX4	84464	ENSG00000188827	chr16	0.622922	4.91026	9.4766	3.58433e-07	4.78216e-06	HeterovsWT		CDH24	64403	ENSG00000139880	chr14	1.23166	4.57956	13.7129	4.60275e-09	5.91994e-08	HomovsWT
APEX2	27301	ENSG00000169188	chrX	-0.495957	5.37433	-9.4767	3.58387e-07	4.78216e-06	HeterovsWT		HAX1	10456	ENSG00000143575	chr1	-0.91341	6.6906	-14.0279	3.49423e-09	4.7463e-08	HomovsWT
LINC00683	400660	ENSG00000266256	chr18	-0.724771	4.05971	-9.4672	3.62504e-07	4.83173e-06	HeterovsWT		ROR2	4920	ENSG00000169071	chr9	-6.28195	-1.23155	-15.0102	1.53059e-09	2.54841e-08	HomovsWT
RFC2	5982	ENSG00000049541	chr7	-0.473745	6.68096	-9.46099	3.65219e-07	4.86314e-06	HeterovsWT		VPS50	55610	ENSG00000004766	chr7	-0.792359	5.99725	-13.958	3.71282e-09	4.96189e-08	HomovsWT
DLG4	1742	ENSG00000132535	chr17	0.62015	5.03329	9.45924	3.65987e-07	4.86859e-06	HeterovsWT		AC098820.2	NA	NA	chr2	-3.69254	0.109009	-13.4696	5.71675e-09	7.00134e-08	HomovsWT
EXO1	9156	ENSG00000174371	chr1	0.495861	6.32908	9.45673	3.67094e-07	4.87855e-06	HeterovsWT		HTRA1	5654	ENSG00000166033	chr10	-7.14263	0.289986	-14.818	1.79189e-09	2.8666e-08	HomovsWT
GBP5	115362	ENSG00000154451	chr1	-5.42508	-1.3583	-9.44905	3.705e-07	4.91419e-06	HeterovsWT		SKAP2	8935	ENSG00000005020	chr7	0.765317	7.17604	14.074	3.35762e-09	4.59709e-08	HomovsWT
CEBPG	1054	ENSG00000153879	chr19	-0.42121	7.59635	-9.44984	3.70148e-07	4.91419e-06	HeterovsWT		NDST1	3340	ENSG00000070614	chr5	0.699702	8.19488	14.122	3.2213e-09	4.44968e-08	HomovsWT
CARS2	79587	ENSG00000134905	chr13	-0.434092	7.56836	-9.44489	3.72363e-07	4.93409e-06	HeterovsWT		GPCPD1	56261	ENSG00000125772	chr20	-0.704987	7.2412	-14.0407	3.45573e-09	4.72389e-08	HomovsWT
HLA-B	3106	ENSG00000234745	chr6	-0.760145	8.74076	-9.44243	3.73464e-07	4.94385e-06	HeterovsWT		ZNF121	7675	ENSG00000197961	chr19	-0.74994	7.17235	-14.0402	3.45718e-09	4.72389e-08	HomovsWT
ACPP	NA	NA	chr3	-0.937083	3.02731	-9.44099	3.74112e-07	4.9476e-06	HeterovsWT		MAML1	9794	ENSG00000283780	chr5	0.656908	7.00534	14.0254	3.50154e-09	4.7463e-08	HomovsWT
PORCN	64840	ENSG00000102312	chrX	-1.08601	3.54164	-9.43906	3.74985e-07	4.95432e-06	HeterovsWT		HLA-B	3106	ENSG00000234745	chr6	-1.14451	8.74076	-14.0926	3.30401e-09	4.53579e-08	HomovsWT
SNX18	112574	ENSG00000178996	chr5	-0.479251	5.93973	-9.43528	3.76695e-07	4.97208e-06	HeterovsWT		TPX2	22974	ENSG00000088325	chr20	0.588981	9.33893	14.1095	3.25615e-09	4.48985e-08	HomovsWT
ANKFN1	162282	ENSG00000153930	chr17	-4.45263	-0.554665	-9.43333	3.77583e-07	4.97414e-06	HeterovsWT		USP3	9960	ENSG00000140455	chr15	-0.900418	4.87194	-13.6895	4.69897e-09	6.00955e-08	HomovsWT
ELL2	22936	ENSG00000118985	chr5	-0.826752	3.2837	-9.43339	3.77556e-07	4.97414e-06	HeterovsWT		FAAH	2166	ENSG00000117480	chr1	1.3107	6.1991	13.839	4.11913e-09	5.3846e-08	HomovsWT
LMTK3	114783	ENSG00000142235	chr19	-1.3284	2.48203	-9.43098	3.78654e-07	4.98342e-06	HeterovsWT		FBXW2	26190	ENSG00000119402	chr9	0.649299	7.15323	13.9848	3.62714e-09	4.87278e-08	HomovsWT
FOXO4	4303	ENSG00000184481	chrX	-0.777145	3.92582	-9.42334	3.82157e-07	5.02464e-06	HeterovsWT		HIPK2	28996	ENSG00000064393	chr7	0.948909	7.32587	13.9939	3.5987e-09	4.84973e-08	HomovsWT
AL139352.1	NA	NA	chr20	-2.88772	-1.72052	-9.41976	3.8381e-07	5.03663e-06	HeterovsWT		EML1	2009	ENSG00000066629	chr14	-5.02891	0.612983	-13.5295	5.41801e-09	6.75733e-08	HomovsWT
HDAC9	9734	ENSG00000048052	chr7	3.9204	0.294184	9.42045	3.83493e-07	5.03663e-06	HeterovsWT		GNA11	2767	ENSG00000088256	chr19	-7.96724	-1.79785	-14.6731	2.02039e-09	3.11475e-08	HomovsWT
CHD8	57680	ENSG00000100888	chr14	0.408451	7.13146	9.4157	3.85697e-07	5.0565e-06	HeterovsWT		PDZD2	23037	ENSG00000133401	chr5	-1.77713	3.074	-13.2755	6.81211e-09	8.10176e-08	HomovsWT
DENND2D	79961	ENSG00000162777	chr1	-0.573224	7.14374	-9.40914	3.88763e-07	5.09178e-06	HeterovsWT		PHACTR4	65979	ENSG00000204138	chr1	0.747423	6.30526	13.8761	3.98765e-09	5.25317e-08	HomovsWT
PTPRE	5791	ENSG00000132334	chr10	-0.538114	6.32772	-9.40463	3.90886e-07	5.11466e-06	HeterovsWT		GLI2	2736	ENSG00000074047	chr2	-6.20912	-1.77414	-15.0058	1.53601e-09	2.55349e-08	HomovsWT
TC2N	123036	ENSG00000165929	chr14	2.45949	-1.11464	9.39842	3.93828e-07	5.14819e-06	HeterovsWT		C6orf62	81688	ENSG00000112308	chr6	0.650743	7.57322	13.9687	3.67822e-09	4.92678e-08	HomovsWT
NPTX2	4885	ENSG00000106236	chr7	-2.25555	0.306975	-9.38752	3.99052e-07	5.21147e-06	HeterovsWT		LINC02367	101930452	ENSG00000260423	chr12	-1.19103	3.46906	-13.3773	6.21185e-09	7.53298e-08	HomovsWT
HNMT	3176	ENSG00000150540	chr2	-0.88951	2.71559	-9.38622	3.99681e-07	5.21217e-06	HeterovsWT		FCHO1	23149	ENSG00000130475	chr19	-0.773981	6.14375	-13.8182	4.195e-09	5.45727e-08	HomovsWT
PCGF5	84333	ENSG00000180628	chr10	-0.619531	5.85735	-9.38582	3.99874e-07	5.21217e-06	HeterovsWT		NFATC2	4773	ENSG00000101096	chr20	0.689041	6.62887	13.8612	4.04007e-09	5.30166e-08	HomovsWT
DNAJA4	55466	ENSG00000140403	chr15	1.86625	1.52622	9.38399	4.0076e-07	5.21871e-06	HeterovsWT		LINC01399	104310353	ENSG00000233080	chr22	-7.62056	-1.65919	-14.5914	2.16289e-09	3.2925e-08	HomovsWT
RELCH	57614	ENSG00000134444	chr18	0.531339	6.74975	9.37968	4.02854e-07	5.24096e-06	HeterovsWT		ST3GAL1	6482	ENSG00000008513	chr8	0.661524	7.95888	13.9572	3.71539e-09	4.96189e-08	HomovsWT
KIZ	55857	ENSG00000088970	chr20	-0.738961	3.88011	-9.36689	4.09145e-07	5.31772e-06	HeterovsWT		ZWINT	11130	ENSG00000122952	chr10	0.785097	6.27868	13.7888	4.30488e-09	5.57909e-08	HomovsWT
AC008014.1	NA	NA	chr12	-0.632309	4.71683	-9.36247	4.11343e-07	5.34116e-06	HeterovsWT		GAL	51083	ENSG00000069482	chr11	-6.0386	1.43871	-13.8035	4.24951e-09	5.51259e-08	HomovsWT
REPS2	9185	ENSG00000169891	chrX	-0.982209	3.05273	-9.35586	4.1465e-07	5.37897e-06	HeterovsWT		MKI67	4288	ENSG00000148773	chr10	0.807206	8.93554	13.9804	3.64094e-09	4.88648e-08	HomovsWT
AC246817.1	NA	NA	chr8	-0.92483	5.05784	-9.3519	4.16646e-07	5.39455e-06	HeterovsWT		TBC1D5	9779	ENSG00000131374	chr3	-0.872994	7.88404	-13.9214	3.83297e-09	5.0889e-08	HomovsWT
SMS	6611	ENSG00000102172	chrX	-0.523544	7.90272	-9.35257	4.16307e-07	5.39455e-06	HeterovsWT		ZNF398	57541	ENSG00000197024	chr7	0.706177	5.52561	13.6941	4.68014e-09	5.99111e-08	HomovsWT
ZNF107	51427	ENSG00000196247	chr7	0.609388	5.42019	9.34335	4.20993e-07	5.44565e-06	HeterovsWT		IRF2BP2	359948	ENSG00000168264	chr1	-0.56437	8.34215	-13.9424	3.76348e-09	5.01133e-08	HomovsWT
GTPBP10	85865	ENSG00000105793	chr7	-0.591903	5.3839	-9.33503	4.25264e-07	5.49566e-06	HeterovsWT		AC145207.5	NA	NA	chr17	0.996576	4.73259	13.5261	5.43455e-09	6.76861e-08	HomovsWT
PUDP	8226	ENSG00000130021	chrX	-0.557838	5.8947	-9.32841	4.28701e-07	5.5348e-06	HeterovsWT		FAM126A	84668	ENSG00000122591	chr7	0.859334	6.57824	13.8279	4.15975e-09	5.42726e-08	HomovsWT
ARHGEF10L	55160	ENSG00000074964	chr1	0.571534	4.85307	9.32708	4.29396e-07	5.53852e-06	HeterovsWT		BCL2	596	ENSG00000171791	chr18	0.671105	7.67037	13.8954	3.92108e-09	5.1856e-08	HomovsWT
RAB3B	5865	ENSG00000169213	chr1	3.74528	-0.430206	9.32037	4.32914e-07	5.5786e-06	HeterovsWT		C18orf54	162681	ENSG00000166845	chr18	1.15815	5.76759	13.6696	4.78279e-09	6.09951e-08	HomovsWT
AC145625.2	NA	NA	chr2	3.3399	-1.88897	9.31953	4.33356e-07	5.57899e-06	HeterovsWT		PEX1	5189	ENSG00000127980	chr7	-1.05293	4.79633	-13.5663	5.24252e-09	6.57469e-08	HomovsWT
AP1S3	130340	ENSG00000152056	chr2	2.34081	0.620716	9.31635	4.35033e-07	5.59529e-06	HeterovsWT		AC073529.1	NA	NA	chrX	-1.0114	4.53568	-13.4774	5.67701e-09	6.96523e-08	HomovsWT
ILDR2	387597	ENSG00000143195	chr1	4.97411	-2.43944	9.3155	4.35485e-07	5.59579e-06	HeterovsWT		AC245187.2	NA	NA	chr8	-7.86057	-1.49682	-14.4917	2.35171e-09	3.50999e-08	HomovsWT
TMEM135	65084	ENSG00000166575	chr11	0.657942	5.90646	9.31048	4.38154e-07	5.61946e-06	HeterovsWT		HIST1H3I	NA	NA	chr6	-2.86609	3.33302	-13.1332	7.7579e-09	9.00579e-08	HomovsWT
WEE1	7465	ENSG00000166483	chr11	0.525811	6.81826	9.31054	4.38123e-07	5.61946e-06	HeterovsWT		SLC24A3	57419	ENSG00000185052	chr20	-8.84998	0.90991	-14.4262	2.48511e-09	3.6346e-08	HomovsWT
ETFA	2108	ENSG00000140374	chr15	-0.451978	6.92137	-9.30628	4.40396e-07	5.64288e-06	HeterovsWT		RAD51B	5890	ENSG00000182185	chr14	-0.700484	7.70224	-13.8877	3.94742e-09	5.20523e-08	HomovsWT
TNFRSF10B	8795	ENSG00000120889	chr8	-0.506939	6.7292	-9.30014	4.43701e-07	5.66925e-06	HeterovsWT		MDN1	23195	ENSG00000288121	chr6	0.625544	8.03492	13.9036	3.89291e-09	5.15342e-08	HomovsWT
POLQ	10721	ENSG00000051341	chr3	0.409918	6.98565	9.30159	4.42922e-07	5.66925e-06	HeterovsWT		FLNA	2316	ENSG00000196924	chrX	-0.670418	11.4857	-14.0076	3.55597e-09	4.80569e-08	HomovsWT
UBR3	130507	ENSG00000144357	chr2	-0.446759	6.84233	-9.30014	4.43706e-07	5.66925e-06	HeterovsWT		UBQLN2	29978	ENSG00000188021	chrX	-1.0003	5.3129	-13.5816	5.17177e-09	6.52816e-08	HomovsWT
C5AR1	728	ENSG00000197405	chr19	-1.15736	2.91319	-9.29923	4.44198e-07	5.6702e-06	HeterovsWT		KLF10	7071	ENSG00000155090	chr8	1.02999	5.08985	13.5598	5.2733e-09	6.6072e-08	HomovsWT
KCNMB4	27345	ENSG00000135643	chr12	4.97749	-0.699332	9.29723	4.45279e-07	5.67866e-06	HeterovsWT		LTV1	84946	ENSG00000135521	chr6	-1.21502	4.00105	-13.3074	6.61794e-09	7.92636e-08	HomovsWT
KIF22	3835	ENSG00000079616	chr16	0.421612	7.59598	9.29593	4.45983e-07	5.68231e-06	HeterovsWT		F13A1	2162	ENSG00000124491	chr6	-6.14602	-0.610613	-14.2586	2.86531e-09	4.07695e-08	HomovsWT
VAMP4	8674	ENSG00000117533	chr1	-0.68461	4.59061	-9.2949	4.46544e-07	5.68413e-06	HeterovsWT		FANCB	2187	ENSG00000181544	chrX	-0.831663	6.02435	-13.6771	4.75079e-09	6.0644e-08	HomovsWT
UBE4B	10277	ENSG00000130939	chr1	0.422144	7.41951	9.28654	4.5112e-07	5.73699e-06	HeterovsWT		RCC1	1104	ENSG00000180198	chr1	0.742101	8.21073	13.8649	4.02699e-09	5.29474e-08	HomovsWT
USP3	9960	ENSG00000140455	chr15	-0.589186	4.87194	-9.28373	4.52668e-07	5.7513e-06	HeterovsWT		HECTD3	79654	ENSG00000126107	chr1	0.952639	5.51496	13.5772	5.19202e-09	6.53611e-08	HomovsWT
PACS2	23241	ENSG00000179364	chr14	0.583641	7.02374	9.2818	4.53736e-07	5.75948e-06	HeterovsWT		ACSS1	84532	ENSG00000154930	chr20	-0.849886	7.86101	-13.8327	4.14198e-09	5.40926e-08	HomovsWT
ABCD3	5825	ENSG00000117528	chr1	-0.52691	6.51018	-9.28006	4.54699e-07	5.76632e-06	HeterovsWT		PUDP	8226	ENSG00000130021	chrX	-0.837266	5.8947	-13.6471	4.87903e-09	6.19896e-08	HomovsWT
PTPRC	5788	ENSG00000262418	chr1	-0.677838	7.88425	-9.2763	4.56791e-07	5.78744e-06	HeterovsWT		UCHL5	51377	ENSG00000116750	chr1	-1.08375	6.96743	-13.7548	4.43557e-09	5.7266e-08	HomovsWT
PI4K2A	55361	ENSG00000155252	chr10	-0.72493	3.96954	-9.27502	4.57507e-07	5.79112e-06	HeterovsWT		AC021231.1	NA	NA	chr15	-2.49868	1.42085	-13.0175	8.63063e-09	9.79413e-08	HomovsWT
UCP2	7351	ENSG00000175567	chr11	0.617326	6.54231	9.27359	4.58305e-07	5.79581e-06	HeterovsWT		EIF3I	8668	ENSG00000084623	chr1	-0.648804	7.22371	-13.7784	4.34467e-09	5.62529e-08	HomovsWT
DDX60L	91351	ENSG00000181381	chr4	-0.52035	5.9018	-9.27255	4.58886e-07	5.79776e-06	HeterovsWT		EYS	346007	ENSG00000188107	chr6	-2.32356	1.46004	-12.9761	8.96843e-09	1.00835e-07	HomovsWT
BCR	613	ENSG00000186716	chr22	0.574725	7.66694	9.26606	4.62537e-07	5.83845e-06	HeterovsWT		COLGALT1	79709	ENSG00000130309	chr19	-0.790447	8.79503	-13.8622	4.03635e-09	5.30166e-08	HomovsWT
CARMN	728264	NA	chr5	1.31924	1.35225	9.26512	4.63072e-07	5.83978e-06	HeterovsWT		AKAP7	9465	ENSG00000118507	chr6	-6.38061	-0.941184	-14.4009	2.53886e-09	3.69591e-08	HomovsWT
AC018742.1	NA	NA	chr2	3.83665	-1.61129	9.26241	4.64608e-07	5.85372e-06	HeterovsWT		GPR85	54329	ENSG00000164604	chr7	-2.46405	1.55209	-12.9313	9.34941e-09	1.04599e-07	HomovsWT
SRA1	10011	ENSG00000213523	chr5	-0.63553	5.074	-9.25977	4.66107e-07	5.86716e-06	HeterovsWT		SS18L1	26039	ENSG00000184402	chr20	0.716404	6.45746	13.6585	4.82984e-09	6.15374e-08	HomovsWT
GPR107	57720	ENSG00000148358	chr9	0.48605	7.02445	9.25367	4.69596e-07	5.90061e-06	HeterovsWT		AL139383.1	NA	NA	chr13	-2.64592	1.03147	-12.9303	9.35812e-09	1.04611e-07	HomovsWT
PYGL	5836	ENSG00000100504	chr14	-0.363413	8.09895	-9.25361	4.69633e-07	5.90061e-06	HeterovsWT		ALDH1A1	216	ENSG00000165092	chr9	-6.79657	-0.552449	-14.3284	2.70003e-09	3.88566e-08	HomovsWT
ARHGEF2	9181	ENSG00000116584	chr1	0.437672	8.18263	9.25127	4.70978e-07	5.90822e-06	HeterovsWT		TRIM58	25893	ENSG00000162722	chr1	-1.51143	3.57811	-13.1317	7.76903e-09	9.00929e-08	HomovsWT
RPL18A	6142	ENSG00000105640	chr19	-0.454746	9.34489	-9.25104	4.71109e-07	5.90822e-06	HeterovsWT		CACYBP	27101	ENSG00000116161	chr1	-0.891975	7.00724	-13.6796	4.74025e-09	6.05665e-08	HomovsWT
POLA1	5422	ENSG00000101868	chrX	-0.437137	7.85486	-9.24581	4.74135e-07	5.94068e-06	HeterovsWT		RORB	6096	ENSG00000198963	chr9	-1.25131	5.90537	-13.5764	5.1959e-09	6.53611e-08	HomovsWT
TRIP6	7205	ENSG00000087077	chr7	-1.3227	2.93698	-9.24315	4.75677e-07	5.95452e-06	HeterovsWT		ZNF212	7988	ENSG00000170260	chr7	1.2042	4.47067	13.3132	6.58329e-09	7.89181e-08	HomovsWT
ATP5F1A	498	ENSG00000152234	chr18	0.655647	9.92128	9.24177	4.76482e-07	5.9591e-06	HeterovsWT		KLKB1	3818	ENSG00000164344	chr4	-1.7547	2.62991	-12.9588	9.11334e-09	1.02127e-07	HomovsWT
PIGN	23556	ENSG00000197563	chr18	0.635797	6.97614	9.23959	4.77754e-07	5.9695e-06	HeterovsWT		ZNF3	7551	ENSG00000166526	chr7	-0.738703	5.99889	-13.5761	5.19732e-09	6.53611e-08	HomovsWT
LARS2	23395	ENSG00000011376	chr3	0.505974	6.72247	9.23536	4.80236e-07	5.98957e-06	HeterovsWT		VAX2	25806	ENSG00000116035	chr2	-5.10199	-0.00656713	-14.0936	3.30114e-09	4.53579e-08	HomovsWT
PDK3	5165	ENSG00000067992	chrX	-0.654257	7.218	-9.23535	4.80242e-07	5.98957e-06	HeterovsWT		IL1RN	3557	ENSG00000136689	chr2	-2.20846	2.70295	-12.9698	9.02066e-09	1.01339e-07	HomovsWT
OAT	4942	ENSG00000065154	chr10	-0.508602	6.15993	-9.23028	4.83235e-07	6.02138e-06	HeterovsWT		AHDC1	27245	ENSG00000126705	chr1	0.951289	5.85653	13.5124	5.50157e-09	6.82004e-08	HomovsWT
MAN1C1	57134	ENSG00000117643	chr1	0.641612	5.23884	9.22319	4.8745e-07	6.06832e-06	HeterovsWT		DMAC2	55101	ENSG00000105341	chr19	0.700225	5.99131	13.5447	5.3448e-09	6.67829e-08	HomovsWT
CYP46A1	10858	ENSG00000036530	chr14	0.625941	4.78074	9.22175	4.88312e-07	6.07349e-06	HeterovsWT		PCNT	5116	ENSG00000160299	chr21	0.82123	7.61635	13.6996	4.65708e-09	5.96722e-08	HomovsWT
GPR68	8111	ENSG00000119714	chr14	-1.1668	2.25405	-9.21466	4.92577e-07	6.12093e-06	HeterovsWT		SMS	6611	ENSG00000102172	chrX	-0.773797	7.90272	-13.7059	4.63125e-09	5.94534e-08	HomovsWT
AC073869.1	NA	NA	chr2	0.698056	6.32633	9.20374	4.9922e-07	6.19782e-06	HeterovsWT		LINC01108	102216342	ENSG00000226673	chr6	3.67052	-0.659178	13.4235	5.95853e-09	7.25168e-08	HomovsWT
LINC00504	201853	ENSG00000248360	chr4	-0.968407	3.67185	-9.19148	5.068e-07	6.28138e-06	HeterovsWT		NRBP2	340371	ENSG00000185189	chr8	-1.2979	3.15072	-13.021	8.60285e-09	9.77862e-08	HomovsWT
FAM135A	57579	ENSG00000082269	chr6	-0.730652	5.96874	-9.19135	5.06876e-07	6.28138e-06	HeterovsWT		TTC7B	145567	ENSG00000165914	chr14	-1.19119	4.37169	-13.2548	6.94163e-09	8.22698e-08	HomovsWT
SEMA6A	57556	ENSG00000092421	chr5	-0.880774	2.67988	-9.18487	5.10934e-07	6.3259e-06	HeterovsWT		IL18RAP	8807	ENSG00000115607	chr2	2.32693	2.01916	12.8894	9.72134e-09	1.0796e-07	HomovsWT
LINC02367	101930452	ENSG00000260423	chr12	-0.764387	3.46906	-9.18287	5.12189e-07	6.33565e-06	HeterovsWT		VAMP4	8674	ENSG00000117533	chr1	-1.02208	4.59061	-13.2962	6.68556e-09	7.98621e-08	HomovsWT
ZWINT	11130	ENSG00000122952	chr10	0.530279	6.27868	9.1808	5.13497e-07	6.34606e-06	HeterovsWT		NFE2L2	4780	ENSG00000116044	chr2	-0.712727	6.88258	-13.6009	5.08359e-09	6.4288e-08	HomovsWT
KIAA1522	57648	ENSG00000162522	chr1	0.868929	4.20701	9.17745	5.15619e-07	6.36649e-06	HeterovsWT		ORMDL1	94101	ENSG00000128699	chr2	-1.20204	6.17841	-13.5058	5.5339e-09	6.8453e-08	HomovsWT
TFEB	7942	ENSG00000112561	chr6	-0.732715	4.87564	-9.17456	5.17457e-07	6.38338e-06	HeterovsWT		ITGAD	3681	ENSG00000156886	chr16	3.78722	0.861561	13.0174	8.6317e-09	9.79413e-08	HomovsWT
CCDC102B	79839	ENSG00000150636	chr18	1.38956	2.03572	9.16866	5.21225e-07	6.42402e-06	HeterovsWT		TGFBRAP1	9392	ENSG00000135966	chr2	-0.725856	6.70516	-13.5724	5.21446e-09	6.54945e-08	HomovsWT
AC245100.3	NA	NA	chr1	-1.31832	1.29754	-9.16429	5.24041e-07	6.44704e-06	HeterovsWT		RAB33A	9363	ENSG00000134594	chrX	-0.935605	4.45401	-13.292	6.71114e-09	8.00972e-08	HomovsWT
ADAMTS17	170691	ENSG00000140470	chr15	-0.740233	3.88065	-9.16484	5.23687e-07	6.44704e-06	HeterovsWT		INTS3	65123	ENSG00000262826	chr1	-0.780276	6.48979	-13.541	5.36262e-09	6.6944e-08	HomovsWT
AL390957.1	NA	NA	chr1	-0.775035	3.96835	-9.16308	5.24819e-07	6.45076e-06	HeterovsWT		LFNG	3955	ENSG00000106003	chr7	1.27548	5.88184	13.512	5.50344e-09	6.82004e-08	HomovsWT
PTEN	5728	ENSG00000171862	chr10	-0.477851	7.81576	-9.16124	5.26015e-07	6.45962e-06	HeterovsWT		KDM6A	7403	ENSG00000147050	chrX	-0.700845	6.50261	-13.5585	5.2792e-09	6.60849e-08	HomovsWT
MTMR4	9110	ENSG00000108389	chr17	0.398143	7.42547	9.15188	5.32115e-07	6.52862e-06	HeterovsWT		ARAP2	116984	ENSG00000047365	chr4	0.951943	4.52168	13.3682	6.2634e-09	7.58872e-08	HomovsWT
EXT1	2131	ENSG00000182197	chr8	-2.53607	-0.90455	-9.14998	5.33367e-07	6.53218e-06	HeterovsWT		POLR3C	10623	ENSG00000186141	chr1	-0.714538	5.91895	-13.4669	5.73075e-09	7.01217e-08	HomovsWT
TM7SF3	51768	ENSG00000064115	chr12	0.504481	6.80023	9.15022	5.33204e-07	6.53218e-06	HeterovsWT		FBXO36	130888	ENSG00000153832	chr2	1.81554	2.28917	12.8467	1.01169e-08	1.11351e-07	HomovsWT
TMSB4X	7114	ENSG00000205542	chrX	-0.813652	10.5637	-9.14241	5.38368e-07	6.58749e-06	HeterovsWT		CAMKK2	10645	ENSG00000110931	chr12	-0.680653	7.47945	-13.6278	4.96326e-09	6.29421e-08	HomovsWT
CHST11	50515	ENSG00000171310	chr12	0.460516	8.05751	9.14086	5.39402e-07	6.5942e-06	HeterovsWT		ITGA3	3675	ENSG00000005884	chr17	1.14813	3.51687	13.0682	8.23575e-09	9.42358e-08	HomovsWT
AP1S1	1174	ENSG00000106367	chr7	-0.901896	6.23852	-9.13746	5.41669e-07	6.61596e-06	HeterovsWT		CENPO	79172	ENSG00000138092	chr2	0.756013	5.82078	13.4378	5.88243e-09	7.17192e-08	HomovsWT
BAG6	7917	ENSG00000227761	chr6	0.483477	8.56474	9.13657	5.42262e-07	6.61725e-06	HeterovsWT		DKC1	1736	ENSG00000130826	chrX	-0.806359	7.53847	-13.639	4.91436e-09	6.23802e-08	HomovsWT
IAH1	285148	ENSG00000134330	chr2	0.61977	4.78394	9.13501	5.43307e-07	6.62406e-06	HeterovsWT		PPP2R2B	5521	ENSG00000156475	chr5	-8.80777	-1.05885	-14.0327	3.47953e-09	4.74487e-08	HomovsWT
AC093512.2	NA	NA	chr16	1.07111	3.14488	9.12847	5.47715e-07	6.6718e-06	HeterovsWT		CPPED1	55313	ENSG00000103381	chr16	0.723804	5.93273	13.4761	5.68354e-09	6.96696e-08	HomovsWT
CCNE2	9134	ENSG00000175305	chr8	0.82695	4.68966	9.1248	5.50207e-07	6.69615e-06	HeterovsWT		AC126323.6	NA	NA	chr15	-1.90289	2.59968	-12.8976	9.64687e-09	1.07397e-07	HomovsWT
PALM	5064	ENSG00000099864	chr19	1.07026	4.0876	9.12095	5.52827e-07	6.71601e-06	HeterovsWT		SLC4A11	83959	ENSG00000088836	chr20	-1.5276	3.36547	-12.9982	8.78652e-09	9.95317e-08	HomovsWT
TSPAN33	340348	ENSG00000158457	chr7	-0.804247	4.67698	-9.1213	5.52593e-07	6.71601e-06	HeterovsWT		GNA15	2769	ENSG00000060558	chr19	-1.10697	5.02313	-13.2973	6.67879e-09	7.98515e-08	HomovsWT
COX5A	9377	ENSG00000178741	chr15	-0.537166	6.21828	-9.12018	5.53358e-07	6.71645e-06	HeterovsWT		ATF2	1386	ENSG00000115966	chr2	-0.899563	7.63355	-13.6115	5.03603e-09	6.37602e-08	HomovsWT
HNRNPH2	3188	ENSG00000126945	chrX	-0.769048	5.50754	-9.11532	5.5669e-07	6.75086e-06	HeterovsWT		RPS6KA3	6197	ENSG00000177189	chrX	-0.941297	7.37616	-13.6112	5.03716e-09	6.37602e-08	HomovsWT
AL450345.2	NA	NA	chr6	-2.65196	0.506225	-9.10802	5.61742e-07	6.80605e-06	HeterovsWT		SLC25A25	114789	ENSG00000148339	chr9	1.11286	4.57661	13.2494	6.97637e-09	8.24729e-08	HomovsWT
ORC1	4998	ENSG00000085840	chr1	0.478889	6.87724	9.10628	5.62951e-07	6.81003e-06	HeterovsWT		AC136431.1	NA	NA	chr16	-4.45466	-0.208358	-13.3507	6.36333e-09	7.68579e-08	HomovsWT
SUPT6H	6830	ENSG00000109111	chr17	0.415965	6.90859	9.10539	5.63575e-07	6.81003e-06	HeterovsWT		PYHIN1	149628	ENSG00000163564	chr1	-3.4538	0.917664	-12.8733	9.86899e-09	1.09283e-07	HomovsWT
FANCD2	2177	ENSG00000144554	chr3	0.411286	7.30441	9.10606	5.63102e-07	6.81003e-06	HeterovsWT		AC027601.1	NA	NA	chr17	3.9686	1.42227	12.9634	9.07442e-09	1.01858e-07	HomovsWT
AL136116.3	NA	NA	chr6	2.46684	-0.223057	9.10204	5.65913e-07	6.83221e-06	HeterovsWT		DYRK3	8444	ENSG00000143479	chr1	-0.928652	5.79891	-13.398	6.09688e-09	7.40678e-08	HomovsWT
CCM2	83605	ENSG00000136280	chr7	0.490661	6.55091	9.10014	5.67245e-07	6.8422e-06	HeterovsWT		ID2	3398	ENSG00000115738	chr2	0.864849	5.67956	13.4447	5.84572e-09	7.13356e-08	HomovsWT
ARIH1	25820	ENSG00000166233	chr15	-0.392858	7.75002	-9.09864	5.68305e-07	6.8489e-06	HeterovsWT		ANP32A	8125	ENSG00000140350	chr15	-0.614763	8.73537	-13.6517	4.8592e-09	6.18535e-08	HomovsWT
EXPH5	23086	ENSG00000110723	chr11	1.30599	0.599975	9.09666	5.69701e-07	6.85965e-06	HeterovsWT		HIBCH	26275	ENSG00000198130	chr2	-0.890938	5.72267	-13.3618	6.29942e-09	7.62556e-08	HomovsWT
FGFR3	2261	ENSG00000068078	chr4	1.49099	2.03877	9.09058	5.74004e-07	6.90533e-06	HeterovsWT		AC009404.1	NA	NA	chr2	-1.65424	2.3302	-12.7947	1.06225e-08	1.15327e-07	HomovsWT
SLC49A4	84925	ENSG00000138463	chr3	-0.968767	3.11707	-9.08719	5.7642e-07	6.92826e-06	HeterovsWT		DAB2IP	153090	ENSG00000136848	chr9	2.46133	2.51407	12.7744	1.08266e-08	1.17168e-07	HomovsWT
AL356414.1	NA	NA	chr20	-0.897118	2.42556	-9.08116	5.80747e-07	6.96793e-06	HeterovsWT		TNRC18	84629	ENSG00000182095	chr7	1.15479	9.52268	13.6474	4.87778e-09	6.19896e-08	HomovsWT
ETV5	2119	ENSG00000244405	chr3	-0.435555	7.01535	-9.08133	5.80623e-07	6.96793e-06	HeterovsWT		PTPN14	5784	ENSG00000152104	chr1	-1.98671	2.6567	-12.759	1.09844e-08	1.18593e-07	HomovsWT
ATG10	83734	ENSG00000152348	chr5	-0.481728	5.39908	-9.07973	5.81777e-07	6.96799e-06	HeterovsWT		COL19A1	1310	ENSG00000082293	chr6	-6.21376	-0.568631	-14.0085	3.5532e-09	4.80569e-08	HomovsWT
RFX3	5991	ENSG00000080298	chr9	-0.633595	5.68424	-9.07973	5.81778e-07	6.96799e-06	HeterovsWT		TRBV7-2	28596	ENSG00000282939	chr7	-6.43923	-3.51954	-14.239	2.91384e-09	4.13108e-08	HomovsWT
CLSPN	63967	ENSG00000092853	chr1	0.639194	6.79939	9.0788	5.82453e-07	6.96993e-06	HeterovsWT		TTC21B	79809	ENSG00000123607	chr2	-0.956754	5.34831	-13.2745	6.81884e-09	8.10266e-08	HomovsWT
SLC25A23	79085	ENSG00000125648	chr19	-0.538864	6.34755	-9.07554	5.84813e-07	6.99202e-06	HeterovsWT		AP000943.2	NA	NA	chr11	-3.34104	0.957295	-12.742	1.11617e-08	1.20316e-07	HomovsWT
METTL4	64863	ENSG00000101574	chr18	0.528985	5.13982	9.06986	5.88947e-07	7.02907e-06	HeterovsWT		HLA-DRB5	3127	ENSG00000198502	chr6	-6.80245	-1.76116	-14.14	3.17175e-09	4.40286e-08	HomovsWT
LMAN1	3998	ENSG00000074695	chr18	0.590471	8.24424	9.06999	5.88852e-07	7.02907e-06	HeterovsWT		FAM200A	221786	ENSG00000221909	chr7	-1.27454	2.95884	-12.8774	9.83099e-09	1.09089e-07	HomovsWT
NUP37	79023	ENSG00000075188	chr12	-0.566407	4.86408	-9.06578	5.91942e-07	7.0586e-06	HeterovsWT		TRAPPC10	7109	ENSG00000160218	chr21	0.628904	7.16605	13.5026	5.54984e-09	6.85878e-08	HomovsWT
NRSN2-AS1	100507459	ENSG00000225377	chr20	-0.776935	4.42799	-9.05972	5.96413e-07	7.10568e-06	HeterovsWT		LINC02693	339263	ENSG00000212719	chr17	-2.74711	0.854289	-12.7088	1.15169e-08	1.23752e-07	HomovsWT
GFOD1	54438	ENSG00000145990	chr6	-0.47551	5.88549	-9.05154	6.02505e-07	7.17198e-06	HeterovsWT		HFM1	164045	ENSG00000162669	chr1	-5.46934	-0.445222	-14.0272	3.49629e-09	4.7463e-08	HomovsWT
LRRC37B	114659	ENSG00000185158	chr17	0.618434	5.05385	9.04929	6.04196e-07	7.18581e-06	HeterovsWT		ZXDA	7789	ENSG00000198205	chrX	-1.83517	2.08379	-12.6924	1.16975e-08	1.25211e-07	HomovsWT
ACOT9	23597	ENSG00000123130	chrX	-0.608099	4.94608	-9.04763	6.05443e-07	7.19433e-06	HeterovsWT		GSTA4	2941	ENSG00000170899	chr6	-1.74605	2.90335	-12.7984	1.05853e-08	1.15015e-07	HomovsWT
NR2F1-AS1	441094	ENSG00000237187	chr5	-1.57866	2.15374	-9.04012	6.11128e-07	7.24481e-06	HeterovsWT		IARS2	55699	ENSG00000067704	chr1	-0.774646	7.9404	-13.5246	5.44157e-09	6.76861e-08	HomovsWT
NAB1	4664	ENSG00000138386	chr2	0.518087	5.57988	9.04072	6.10667e-07	7.24481e-06	HeterovsWT		RNF149	284996	ENSG00000163162	chr2	0.858526	6.21238	13.3523	6.3542e-09	7.68502e-08	HomovsWT
CRK	1398	ENSG00000167193	chr17	0.476139	6.27215	9.0399	6.11291e-07	7.24481e-06	HeterovsWT		RNLS	55328	ENSG00000184719	chr10	-1.09002	4.14999	-13.0509	8.36878e-09	9.55166e-08	HomovsWT
CLECL1	160365	ENSG00000184293	chr12	-0.590795	7.30232	-9.02826	6.20219e-07	7.34422e-06	HeterovsWT		FBXO4	26272	ENSG00000151876	chr5	-1.16222	4.5507	-13.0812	8.13828e-09	9.32778e-08	HomovsWT
PTPRG	5793	ENSG00000144724	chr3	-0.501152	5.62654	-9.0261	6.21892e-07	7.3512e-06	HeterovsWT		RALY	22913	ENSG00000125970	chr20	0.607665	7.75158	13.4999	5.56331e-09	6.85978e-08	HomovsWT
PRRC2B	84726	ENSG00000288701	chr9	0.421044	8.79724	9.02637	6.21678e-07	7.3512e-06	HeterovsWT		PIK3AP1	118788	ENSG00000155629	chr10	0.523561	8.33654	13.5245	5.442e-09	6.76861e-08	HomovsWT
TRIM14	9830	ENSG00000106785	chr9	0.469638	7.13916	9.0233	6.24061e-07	7.37043e-06	HeterovsWT		ARSB	411	ENSG00000113273	chr5	-0.895744	6.01888	-13.3142	6.57703e-09	7.89127e-08	HomovsWT
ZCCHC14	23174	ENSG00000140948	chr16	0.450968	6.43063	9.01668	6.29231e-07	7.42504e-06	HeterovsWT		TWIST2	117581	ENSG00000233608	chr2	-4.8371	0.815164	-13.2856	6.75022e-09	8.04223e-08	HomovsWT
CXorf56	NA	NA	chrX	-0.917622	4.73685	-9.01416	6.31215e-07	7.44198e-06	HeterovsWT		VPS39	23339	ENSG00000166887	chr15	-0.655669	6.98253	-13.4175	5.99089e-09	7.28454e-08	HomovsWT
UBQLN1	29979	ENSG00000135018	chr9	-0.651978	7.55599	-9.00995	6.34538e-07	7.47467e-06	HeterovsWT		GNAQ	2776	ENSG00000156052	chr9	-0.872091	7.71948	-13.4799	5.66395e-09	6.95549e-08	HomovsWT
TM9SF4	9777	ENSG00000101337	chr20	0.466699	7.87933	9.00882	6.3543e-07	7.47869e-06	HeterovsWT		KLF5	688	ENSG00000102554	chr13	2.75871	0.568001	12.7759	1.08111e-08	1.17094e-07	HomovsWT
DGKI	9162	ENSG00000157680	chr7	-2.19929	-0.295875	-9.00717	6.36741e-07	7.48115e-06	HeterovsWT		AREL1	9870	ENSG00000119682	chr14	0.756847	6.13682	13.3217	6.53233e-09	7.86543e-08	HomovsWT
AC104304.2	NA	NA	chr3	2.73051	-2.13826	9.00775	6.36281e-07	7.48115e-06	HeterovsWT		KIF11	3832	ENSG00000138160	chr10	0.73442	7.53866	13.4568	5.78281e-09	7.0695e-08	HomovsWT
ATP8B4	79895	ENSG00000104043	chr15	-0.51216	9.37778	-9.00215	6.40742e-07	7.52166e-06	HeterovsWT		RBM47	54502	ENSG00000163694	chr4	-0.843501	4.94699	-13.1683	7.51268e-09	8.75856e-08	HomovsWT
BARX1-DT	101928040	ENSG00000235601	chr9	-0.567034	5.58992	-8.98972	6.50771e-07	7.63279e-06	HeterovsWT		ARHGAP20	57569	ENSG00000137727	chr11	-3.71105	0.657527	-12.8451	1.01318e-08	1.11425e-07	HomovsWT
ZNF367	195828	ENSG00000165244	chr9	0.534524	5.99293	8.98309	6.56188e-07	7.68968e-06	HeterovsWT		ZNF44	51710	ENSG00000197857	chr19	1.47811	2.54534	12.6833	1.17976e-08	1.25971e-07	HomovsWT
TTC7B	145567	ENSG00000165914	chr14	-0.761414	4.37169	-8.97935	6.59262e-07	7.70576e-06	HeterovsWT		P4HB	5034	ENSG00000185624	chr17	-0.696641	10.5544	-13.5482	5.32805e-09	6.66349e-08	HomovsWT
ZNF680	340252	ENSG00000173041	chr7	0.586747	5.71078	8.97969	6.58983e-07	7.70576e-06	HeterovsWT		GADD45B	4616	ENSG00000099860	chr19	-0.868953	4.48647	-13.0345	8.49614e-09	9.68076e-08	HomovsWT
RAB32	10981	ENSG00000118508	chr6	-0.566409	5.36928	-8.98053	6.58287e-07	7.70576e-06	HeterovsWT		ADCY7	113	ENSG00000121281	chr16	0.781584	7.17647	13.3828	6.18123e-09	7.50255e-08	HomovsWT
NDC80	10403	ENSG00000080986	chr18	0.553135	6.26288	8.97327	6.643e-07	7.75797e-06	HeterovsWT		RMND5B	64777	ENSG00000145916	chr5	0.855804	5.53434	13.2018	7.28586e-09	8.55286e-08	HomovsWT
OSBPL10	114884	ENSG00000144645	chr3	2.7956	-1.25104	8.97101	6.66181e-07	7.77325e-06	HeterovsWT		ZNF75D	7626	ENSG00000186376	chrX	-0.822962	4.89475	-13.1103	7.92285e-09	9.11752e-08	HomovsWT
TTLL4	9654	ENSG00000135912	chr2	0.42284	6.26286	8.96981	6.67176e-07	7.77819e-06	HeterovsWT		DPH6-DT	100507466	NA	chr15	-1.75812	2.9155	-12.6914	1.1708e-08	1.25211e-07	HomovsWT
TMEM167A	153339	ENSG00000174695	chr5	-0.428762	6.72663	-8.96844	6.68327e-07	7.78492e-06	HeterovsWT		PDCD2	5134	ENSG00000071994	chr6	-0.672401	6.6933	-13.3169	6.56086e-09	7.87883e-08	HomovsWT
CYP3A5	1577	ENSG00000106258	chr7	-1.18189	3.67108	-8.96677	6.69723e-07	7.7945e-06	HeterovsWT		RPS6KC1	26750	ENSG00000136643	chr1	-0.949361	5.31066	-13.1283	7.79307e-09	9.02348e-08	HomovsWT
GARS	NA	NA	chr7	-0.388159	8.90676	-8.96525	6.70997e-07	7.80264e-06	HeterovsWT		TRIM41	90933	ENSG00000146063	chr5	1.12475	5.55995	13.1609	7.56367e-09	8.80289e-08	HomovsWT
SERPINB1	1992	ENSG00000021355	chr6	-0.443361	7.72029	-8.96137	6.74268e-07	7.83397e-06	HeterovsWT		DCHS1	8642	ENSG00000166341	chr11	-3.17642	0.784437	-12.6311	1.2396e-08	1.31225e-07	HomovsWT
TTC13	79573	ENSG00000143643	chr1	-0.478618	6.01045	-8.95898	6.76287e-07	7.85071e-06	HeterovsWT		CX3CR1	1524	ENSG00000168329	chr3	-2.63784	1.46758	-12.5497	1.33946e-08	1.40266e-07	HomovsWT
ZNF449	203523	ENSG00000173275	chrX	-1.03232	3.56903	-8.94885	6.84935e-07	7.94431e-06	HeterovsWT		NUP210	23225	ENSG00000132182	chr3	0.612801	10.5672	13.499	5.56765e-09	6.85978e-08	HomovsWT
AC090204.1	NA	NA	chr8	-2.74966	-0.88973	-8.94353	6.8952e-07	7.99067e-06	HeterovsWT		GCH1	2643	ENSG00000131979	chr14	1.3288	3.11129	12.7249	1.13437e-08	1.22181e-07	HomovsWT
ZNF333	84449	ENSG00000160961	chr19	-0.567069	4.7461	-8.94045	6.92186e-07	8.01473e-06	HeterovsWT		CBX3	11335	ENSG00000122565	chr7	0.782573	8.58631	13.4253	5.94896e-09	7.24653e-08	HomovsWT
GTF2IP4	100093631	ENSG00000233369	chr7	-0.518213	6.20043	-8.93838	6.93987e-07	8.02874e-06	HeterovsWT		PLOD1	5351	ENSG00000083444	chr1	-0.79392	6.75565	-13.2858	6.74877e-09	8.04223e-08	HomovsWT
EEF2	1938	ENSG00000167658	chr19	-0.39476	12.0559	-8.93383	6.97957e-07	8.06779e-06	HeterovsWT		EHMT1	79813	ENSG00000181090	chr9	0.741	7.13475	13.3324	6.46973e-09	7.79697e-08	HomovsWT
MTA3	57504	ENSG00000057935	chr2	0.627097	5.62809	8.93226	6.99338e-07	8.07688e-06	HeterovsWT		SCAMP3	10067	ENSG00000116521	chr1	-0.923345	5.62591	-13.1309	7.77418e-09	9.00929e-08	HomovsWT
USP5	8078	ENSG00000111667	chr12	0.525089	7.13907	8.93064	7.0076e-07	8.08642e-06	HeterovsWT		SLC24A1	9187	ENSG00000074621	chr15	-1.07325	3.99524	-12.844	1.01426e-08	1.11454e-07	HomovsWT
FANCA	2175	ENSG00000187741	chr16	0.490838	7.06549	8.92815	7.02956e-07	8.10489e-06	HeterovsWT		BMX	660	ENSG00000102010	chrX	1.96692	2.32593	12.6614	1.20455e-08	1.28114e-07	HomovsWT
KDSR	2531	ENSG00000119537	chr18	0.443591	6.28715	8.92023	7.09986e-07	8.17899e-06	HeterovsWT		MEPCE	56257	ENSG00000146834	chr7	-0.850031	6.61085	-13.2708	6.84154e-09	8.12254e-08	HomovsWT
NIPSNAP1	8508	ENSG00000184117	chr22	0.557844	5.78465	8.91822	7.11787e-07	8.19279e-06	HeterovsWT		CENPJ	55835	ENSG00000151849	chr13	-0.814523	6.75641	-13.2609	6.90323e-09	8.18862e-08	HomovsWT
CCDC22	28952	ENSG00000101997	chrX	-0.568965	5.96221	-8.90275	7.25769e-07	8.34299e-06	HeterovsWT		CCNF	899	ENSG00000162063	chr16	0.832229	6.2255	13.1937	7.34007e-09	8.5942e-08	HomovsWT
DCAF12	25853	ENSG00000198876	chr9	0.519642	6.4091	8.90243	7.26065e-07	8.34299e-06	HeterovsWT		COP1	64326	ENSG00000143207	chr1	-0.614884	7.24424	-13.3057	6.62802e-09	7.93143e-08	HomovsWT
CASK	8573	ENSG00000147044	chrX	-0.504308	5.28575	-8.89814	7.29996e-07	8.38107e-06	HeterovsWT		NCF1B	654816	ENSG00000182487	chr7	2.57209	0.976881	12.5015	1.40273e-08	1.4588e-07	HomovsWT
MLH1	4292	ENSG00000076242	chr3	0.417281	7.18871	8.89288	7.34853e-07	8.42971e-06	HeterovsWT		TIMM8A	1678	ENSG00000126953	chrX	-1.03113	4.71365	-12.9946	8.8161e-09	9.9693e-08	HomovsWT
PDE3A	5139	ENSG00000172572	chr12	1.7954	0.794842	8.88235	7.44661e-07	8.52781e-06	HeterovsWT		CES1	1066	ENSG00000262243	chr16	-0.628353	7.94953	-13.3434	6.40549e-09	7.72641e-08	HomovsWT
ABCA2	20	ENSG00000107331	chr9	0.816735	5.51746	8.8825	7.44522e-07	8.52781e-06	HeterovsWT		VAMP3	9341	ENSG00000049245	chr1	0.617854	6.63275	13.2381	7.04864e-09	8.30011e-08	HomovsWT
CCN3	4856	ENSG00000136999	chr8	-1.01458	2.97576	-8.88144	7.45517e-07	8.53042e-06	HeterovsWT		TNFRSF19	55504	ENSG00000127863	chr13	-2.27111	1.61773	-12.4817	1.42951e-08	1.48438e-07	HomovsWT
HELZ2	85441	ENSG00000130589	chr20	-1.29651	5.19615	-8.87813	7.48639e-07	8.53049e-06	HeterovsWT		YES1	7525	ENSG00000176105	chr18	-8.19428	1.25728	-13.5825	5.16733e-09	6.52816e-08	HomovsWT
FANCG	2189	ENSG00000221829	chr9	0.578654	5.94009	8.87881	7.47996e-07	8.53049e-06	HeterovsWT		MCTS1	28985	ENSG00000288295	chrX	-1.25377	4.78471	-12.9919	8.83746e-09	9.9693e-08	HomovsWT
PHTF2	57157	ENSG00000006576	chr7	-0.598205	6.54938	-8.87744	7.49292e-07	8.53049e-06	HeterovsWT		KLHL15	80311	ENSG00000174010	chrX	-0.741933	5.93718	-13.1385	7.72067e-09	8.97025e-08	HomovsWT
RETREG2	79137	ENSG00000144567	chr2	0.543508	6.56736	8.87954	7.47306e-07	8.53049e-06	HeterovsWT		TBC1D9	23158	ENSG00000109436	chr4	-1.36128	2.99966	-12.6285	1.24267e-08	1.31449e-07	HomovsWT
DBF4	10926	ENSG00000006634	chr7	-0.636463	7.03029	-8.878	7.48758e-07	8.53049e-06	HeterovsWT		DENND11	57189	ENSG00000262599	chr7	0.601642	7.18216	13.2794	6.78832e-09	8.08054e-08	HomovsWT
ADAM10	102	ENSG00000137845	chr15	-0.482627	8.00601	-8.87978	7.4708e-07	8.53049e-06	HeterovsWT		SCAPER	49855	ENSG00000140386	chr15	-0.81717	6.57218	-13.2042	7.26996e-09	8.54157e-08	HomovsWT
PPP4R1L	55370	NA	chr20	-0.914858	2.36718	-8.87002	7.56338e-07	8.60351e-06	HeterovsWT		FBXL18	80028	ENSG00000155034	chr7	1.11373	5.80003	13.1104	7.92211e-09	9.11752e-08	HomovsWT
TRMT6	51605	ENSG00000089195	chr20	-0.481327	5.60194	-8.86471	7.61427e-07	8.65414e-06	HeterovsWT		MEX3C	51320	ENSG00000176624	chr18	0.714584	6.52126	13.1896	7.36776e-09	8.61921e-08	HomovsWT
FARSA	2193	ENSG00000179115	chr19	-0.443471	6.83863	-8.86212	7.63923e-07	8.67526e-06	HeterovsWT		TRRAP	8295	ENSG00000196367	chr7	-0.72508	8.71271	-13.3502	6.36616e-09	7.68579e-08	HomovsWT
SPG21	51324	ENSG00000090487	chr15	-0.416426	7.69131	-8.85661	7.69256e-07	8.72852e-06	HeterovsWT		CCDC22	28952	ENSG00000101997	chrX	-0.859431	5.96221	-13.1151	7.88846e-09	9.1029e-08	HomovsWT
ARSG	22901	ENSG00000141337	chr17	0.648413	4.36704	8.85467	7.71147e-07	8.74267e-06	HeterovsWT		HPS4	89781	ENSG00000100099	chr22	-0.623405	7.17217	-13.233	7.08091e-09	8.32666e-08	HomovsWT
RBM15B	29890	ENSG00000259956	chr3	0.518281	7.42177	8.84998	7.75726e-07	8.78725e-06	HeterovsWT		LSS	4047	ENSG00000281289	chr21	1.07896	8.54195	13.3203	6.54079e-09	7.8656e-08	HomovsWT
TMEM145	284339	ENSG00000167619	chr19	-1.3103	1.66889	-8.84917	7.76523e-07	8.78895e-06	HeterovsWT		RAB3D	9545	ENSG00000105514	chr19	-1.24826	4.18611	-12.8186	1.03868e-08	1.13677e-07	HomovsWT
EML2	24139	ENSG00000125746	chr19	-0.718082	5.16206	-8.84765	7.78023e-07	8.79859e-06	HeterovsWT		CAPN5	726	ENSG00000149260	chr11	-2.38905	1.00622	-12.4415	1.48577e-08	1.53109e-07	HomovsWT
NCBP2	22916	ENSG00000114503	chr3	-0.47918	6.09283	-8.84175	7.83847e-07	8.85362e-06	HeterovsWT		CIT	11113	ENSG00000122966	chr12	0.702675	7.388	13.2375	7.05222e-09	8.30011e-08	HomovsWT
OBSCN	84033	ENSG00000154358	chr1	0.688426	6.05623	8.8414	7.84193e-07	8.85362e-06	HeterovsWT		AL136181.1	NA	NA	chr10	-4.28209	0.37888	-12.7001	1.16117e-08	1.24574e-07	HomovsWT
ZMIZ1	57178	ENSG00000108175	chr10	0.417978	8.15768	8.8366	7.88971e-07	8.90017e-06	HeterovsWT		THBD	7056	ENSG00000178726	chr20	-1.20239	3.68865	-12.7127	1.14746e-08	1.23395e-07	HomovsWT
RIMKLB	57494	ENSG00000166532	chr12	0.732329	4.31031	8.83524	7.90334e-07	8.90815e-06	HeterovsWT		ALDH3A2	224	ENSG00000072210	chr17	-6.04443	-1.06564	-13.86	4.04424e-09	5.30202e-08	HomovsWT
GUCY2F	2986	ENSG00000101890	chrX	-3.19621	-1.18197	-8.83215	7.93429e-07	8.93561e-06	HeterovsWT		UNC79	57578	ENSG00000133958	chr14	-0.723804	7.10348	-13.1976	7.31354e-09	8.57312e-08	HomovsWT
SFPQ	6421	ENSG00000116560	chr1	0.386344	8.91812	8.82895	7.96648e-07	8.96443e-06	HeterovsWT		TXN	7295	ENSG00000136810	chr9	1.12082	7.79385	13.2439	7.01117e-09	8.2759e-08	HomovsWT
FAHD2A	51011	ENSG00000115042	chr2	0.53709	5.00394	8.82687	7.98756e-07	8.98072e-06	HeterovsWT		PIK3CB	5291	ENSG00000051382	chr3	-0.61749	6.92236	-13.1726	7.48294e-09	8.73138e-08	HomovsWT
THOP1	7064	ENSG00000172009	chr19	-0.71775	7.02117	-8.82009	8.0564e-07	9.05063e-06	HeterovsWT		MAP3K1	4214	ENSG00000095015	chr5	-0.853005	6.37687	-13.1099	7.92618e-09	9.11752e-08	HomovsWT
MAGEH1	28986	ENSG00000187601	chrX	-1.42566	1.05507	-8.81722	8.08585e-07	9.0762e-06	HeterovsWT		TMEM38B	55151	ENSG00000095209	chr9	0.831924	6.26501	13.09	8.07232e-09	9.25998e-08	HomovsWT
RAD51B	5890	ENSG00000182185	chr14	-0.440108	7.70224	-8.81263	8.13304e-07	9.12163e-06	HeterovsWT		CLNK	116449	ENSG00000109684	chr4	7.56389	-2.11132	13.4833	5.64657e-09	6.94043e-08	HomovsWT
ATP10D	57205	ENSG00000145246	chr4	-0.711891	4.07036	-8.80697	8.19165e-07	9.17979e-06	HeterovsWT		KPNA2	3838	ENSG00000182481	chr17	0.554537	8.25393	13.2515	6.96262e-09	8.24466e-08	HomovsWT
FOXK1	221937	ENSG00000164916	chr7	0.427278	8.87764	8.80587	8.20307e-07	9.185e-06	HeterovsWT		PGD	5226	ENSG00000142657	chr1	0.633626	8.30027	13.24	7.03638e-09	8.29584e-08	HomovsWT
IL1B	3553	ENSG00000125538	chr2	0.721151	3.96497	8.80409	8.22158e-07	9.19815e-06	HeterovsWT		KIF2C	11004	ENSG00000142945	chr1	0.6091	7.27432	13.1752	7.46524e-09	8.71822e-08	HomovsWT
COLEC12	81035	ENSG00000158270	chr18	3.92208	-2.14998	8.80113	8.25251e-07	9.22515e-06	HeterovsWT		ADSS	NA	NA	chr1	-0.69447	6.68042	-13.1174	7.87129e-09	9.09629e-08	HomovsWT
CHD9	80205	ENSG00000177200	chr16	0.62891	6.80308	8.79146	8.3545e-07	9.33148e-06	HeterovsWT		TGFA	7039	ENSG00000163235	chr2	1.33461	3.25236	12.5248	1.3717e-08	1.43091e-07	HomovsWT
ST3GAL6	10402	ENSG00000064225	chr3	-0.555064	6.28113	-8.78729	8.39886e-07	9.37332e-06	HeterovsWT		TSPAN3	10099	ENSG00000140391	chr15	-0.614902	7.45226	-13.1853	7.39636e-09	8.64522e-08	HomovsWT
MED25	81857	ENSG00000104973	chr19	0.611023	6.47772	8.77666	8.5132e-07	9.49312e-06	HeterovsWT		PDXK	8566	ENSG00000160209	chr21	0.87095	8.44086	13.2493	6.97698e-09	8.24729e-08	HomovsWT
LRRC2	79442	ENSG00000163827	chr3	2.22963	-1.41891	8.77496	8.5316e-07	9.50006e-06	HeterovsWT		C18orf25	147339	ENSG00000152242	chr18	0.685112	6.60655	13.0991	8.00523e-09	9.19856e-08	HomovsWT
FAM50A	9130	ENSG00000071859	chrX	-0.79689	5.24537	-8.77415	8.5404e-07	9.50006e-06	HeterovsWT		FAM133B	257415	ENSG00000234545	chr7	-0.760574	5.67982	-13.0021	8.75446e-09	9.92513e-08	HomovsWT
SLC37A2	219855	ENSG00000134955	chr11	-0.538296	5.72294	-8.77451	8.53651e-07	9.50006e-06	HeterovsWT		UBXN4	23190	ENSG00000144224	chr2	-0.724617	7.42114	-13.1662	7.5268e-09	8.7675e-08	HomovsWT
HAUS1	115106	ENSG00000152240	chr18	0.569447	5.34775	8.77136	8.57082e-07	9.5261e-06	HeterovsWT		AP006222.1	NA	NA	chr1	-1.49406	3.71808	-12.6265	1.24506e-08	1.31558e-07	HomovsWT
LINC00926	283663	ENSG00000247982	chr15	-0.564633	7.67391	-8.76853	8.60176e-07	9.55266e-06	HeterovsWT		AC112482.2	NA	NA	chr3	-3.80877	1.38372	-12.4154	1.52364e-08	1.55578e-07	HomovsWT
MOSPD1	56180	ENSG00000101928	chrX	-1.1827	3.93816	-8.76547	8.63536e-07	9.58214e-06	HeterovsWT		TXLNG	55787	ENSG00000086712	chrX	-0.849443	4.81126	-12.8351	1.02278e-08	1.12299e-07	HomovsWT
MTFMT	123263	ENSG00000103707	chr15	-0.567003	4.65272	-8.76106	8.68397e-07	9.62126e-06	HeterovsWT		SUCO	51430	ENSG00000094975	chr1	-0.758255	6.40491	-13.0485	8.38725e-09	9.56471e-08	HomovsWT
MDN1	23195	ENSG00000288121	chr6	0.396204	8.03492	8.76098	8.68478e-07	9.62126e-06	HeterovsWT		ZNF646	9726	ENSG00000167395	chr16	0.609587	6.45877	13.0556	8.33221e-09	9.51792e-08	HomovsWT
CTC1	80169	ENSG00000178971	chr17	0.668484	4.83416	8.75737	8.7248e-07	9.65772e-06	HeterovsWT		HYAL3	8372	ENSG00000186792	chr3	-1.22612	3.94004	-12.626	1.24565e-08	1.31558e-07	HomovsWT
CCNQ	92002	ENSG00000262919	chrX	-1.09343	3.97966	-8.75631	8.7367e-07	9.66302e-06	HeterovsWT		MBD1	4152	ENSG00000141644	chr18	0.810037	6.93196	13.0909	8.06541e-09	9.25988e-08	HomovsWT
ZKSCAN5	23660	ENSG00000196652	chr7	-0.554438	5.39491	-8.75415	8.76068e-07	9.67378e-06	HeterovsWT		DENND1C	79958	ENSG00000205744	chr19	-0.803185	4.86766	-12.8502	1.00842e-08	1.11172e-07	HomovsWT
FAM83D	81610	ENSG00000101447	chr20	0.507535	5.94259	8.75469	8.75467e-07	9.67378e-06	HeterovsWT		JPT1	51155	ENSG00000189159	chr17	0.743288	5.96904	12.9839	8.90358e-09	1.00272e-07	HomovsWT
CD27-AS1	678655	ENSG00000215039	chr12	1.88219	0.480112	8.74634	8.84841e-07	9.76272e-06	HeterovsWT		PDAP1	11333	ENSG00000106244	chr7	-0.668224	6.98126	-13.1096	7.92799e-09	9.11752e-08	HomovsWT
EPOR	2057	ENSG00000187266	chr19	-1.17187	2.94735	-8.73736	8.9503e-07	9.86712e-06	HeterovsWT		C11orf80	79703	ENSG00000173715	chr11	0.862176	5.19171	12.8729	9.87266e-09	1.09283e-07	HomovsWT
ZBTB38	253461	ENSG00000177311	chr3	-0.71823	3.72767	-8.72802	9.0577e-07	9.97743e-06	HeterovsWT		LDLRAD4	753	ENSG00000168675	chr18	0.773392	5.41343	12.9226	9.42564e-09	1.05242e-07	HomovsWT
INF2	64423	ENSG00000203485	chr14	0.618034	7.1612	8.72357	9.10936e-07	1.00262e-05	HeterovsWT		AL136018.1	NA	NA	chr14	-2.72157	2.88644	-12.2902	1.71982e-08	1.72186e-07	HomovsWT
NAV1	89796	ENSG00000134369	chr1	-0.71873	3.41223	-8.72209	9.12663e-07	1.00371e-05	HeterovsWT		METTL7B	196410	ENSG00000170439	chr12	-2.84578	0.513091	-12.3886	1.56356e-08	1.59073e-07	HomovsWT
PPP2R5A	5525	ENSG00000066027	chr1	-0.413989	6.81828	-8.72125	9.13642e-07	1.00397e-05	HeterovsWT		SUSD4	55061	ENSG00000143502	chr1	-5.98812	-0.658761	-13.4491	5.82274e-09	7.11191e-08	HomovsWT
P2RX7	5027	ENSG00000089041	chr12	-0.824789	4.10823	-8.72047	9.14546e-07	1.00415e-05	HeterovsWT		RBM33	155435	ENSG00000184863	chr7	0.576945	7.52689	13.1168	7.87604e-09	9.09629e-08	HomovsWT
ERAP1	51752	ENSG00000164307	chr5	-0.644768	5.10455	-8.71691	9.18726e-07	1.00762e-05	HeterovsWT		CXCL8	3576	ENSG00000169429	chr4	-1.81793	1.32764	-12.2953	1.71132e-08	1.7179e-07	HomovsWT
EPHB4	2050	ENSG00000196411	chr7	-0.670135	7.19484	-8.71652	9.19186e-07	1.00762e-05	HeterovsWT		NFKB1	4790	ENSG00000109320	chr4	-0.679014	6.23579	-12.995	8.81282e-09	9.9693e-08	HomovsWT
TMEM229B	161145	ENSG00000198133	chr14	-0.483805	5.61723	-8.71013	9.26718e-07	1.01424e-05	HeterovsWT		DNAJC5B	85479	ENSG00000147570	chr8	-1.72053	1.88293	-12.2869	1.72547e-08	1.72445e-07	HomovsWT
RECQL4	9401	ENSG00000160957	chr8	0.671107	7.42119	8.7107	9.26052e-07	1.01424e-05	HeterovsWT		GXYLT2	727936	ENSG00000172986	chr3	-0.86907	5.28243	-12.8139	1.04325e-08	1.13949e-07	HomovsWT
AC124944.2	NA	NA	chr3	-0.795838	3.94418	-8.70941	9.27572e-07	1.01435e-05	HeterovsWT		RAB3B	5865	ENSG00000169213	chr1	5.07286	-0.430206	13.1973	7.31574e-09	8.57312e-08	HomovsWT
ZNF496	84838	ENSG00000162714	chr1	0.557514	4.23041	8.70369	9.34388e-07	1.01853e-05	HeterovsWT		PRKAG2	51422	ENSG00000106617	chr7	0.735399	6.37695	12.9931	8.82796e-09	9.9693e-08	HomovsWT
ENSA	2029	ENSG00000143420	chr1	0.636325	6.98984	8.70377	9.343e-07	1.01853e-05	HeterovsWT		C17orf67	339210	ENSG00000214226	chr17	0.985854	4.2875	12.6697	1.19507e-08	1.27206e-07	HomovsWT
ZMYND8	23613	ENSG00000101040	chr20	0.374195	7.64859	8.70409	9.33907e-07	1.01853e-05	HeterovsWT		ZSCAN21	7589	ENSG00000166529	chr7	-1.26752	3.02526	-12.4451	1.48077e-08	1.52709e-07	HomovsWT
VCL	7414	ENSG00000035403	chr10	0.421898	7.52648	8.70402	9.34e-07	1.01853e-05	HeterovsWT		TFRC	7037	ENSG00000072274	chr3	-0.539214	8.62141	-13.1504	7.63633e-09	8.87985e-08	HomovsWT
MRPL45	84311	ENSG00000277936	chr17	0.610187	5.3936	8.69927	9.39687e-07	1.02348e-05	HeterovsWT		CDCA5	113130	ENSG00000146670	chr11	1.14426	7.03047	13.0305	8.52753e-09	9.70837e-08	HomovsWT
GRIN3A	116443	ENSG00000198785	chr9	-1.7211	1.18154	-8.69739	9.41954e-07	1.02513e-05	HeterovsWT		SLC37A3	84255	ENSG00000157800	chr7	-1.35557	2.96059	-12.4204	1.51631e-08	1.55124e-07	HomovsWT
PHF20	51230	ENSG00000025293	chr20	0.394652	7.42966	8.69361	9.46525e-07	1.02928e-05	HeterovsWT		SRRM3	222183	ENSG00000177679	chr7	-1.78591	2.31422	-12.2853	1.72809e-08	1.72453e-07	HomovsWT
GSE1	23199	ENSG00000131149	chr16	0.428531	7.99862	8.69176	9.48774e-07	1.0309e-05	HeterovsWT		C12orf49	NA	NA	chr12	0.599765	6.57629	12.9927	8.83161e-09	9.9693e-08	HomovsWT
PCBP4	57060	ENSG00000090097	chr3	0.806637	3.5654	8.68804	9.5331e-07	1.035e-05	HeterovsWT		MTHFD1L	25902	ENSG00000120254	chr6	-0.682952	7.84939	-13.0778	8.1635e-09	9.34879e-08	HomovsWT
B4GALNT1	2583	ENSG00000135454	chr12	3.30558	0.502426	8.68544	9.56493e-07	1.03763e-05	HeterovsWT		ADI1	55256	ENSG00000182551	chr2	-0.970343	6.50595	-12.9418	9.25815e-09	1.03664e-07	HomovsWT
CDH24	64403	ENSG00000139880	chr14	0.806113	4.57956	8.67934	9.64001e-07	1.04453e-05	HeterovsWT		RAB3GAP1	22930	ENSG00000115839	chr2	-0.707346	6.232	-12.896	9.6616e-09	1.07472e-07	HomovsWT
LIN52	91750	ENSG00000205659	chr14	0.544349	5.24061	8.67902	9.64397e-07	1.04453e-05	HeterovsWT		VCX	26609	ENSG00000182583	chrX	-5.84197	-1.78097	-13.5717	5.21757e-09	6.54945e-08	HomovsWT
CCP110	9738	ENSG00000103540	chr16	0.553727	6.57072	8.675	9.69383e-07	1.0491e-05	HeterovsWT		GRIPAP1	56850	ENSG00000068400	chrX	-0.712688	5.63021	-12.8286	1.02901e-08	1.12892e-07	HomovsWT
MYO19	80179	ENSG00000278372	chr17	0.439962	6.86253	8.67321	9.71614e-07	1.05067e-05	HeterovsWT		AC105402.3	NA	NA	chr2	-3.78001	0.0375541	-12.4716	1.44344e-08	1.49655e-07	HomovsWT
NKRF	55922	ENSG00000186416	chrX	-0.767716	4.00636	-8.66933	9.76459e-07	1.05507e-05	HeterovsWT		LINC01684	105372751	ENSG00000237484	chr21	7.42151	-1.71139	13.2436	7.01338e-09	8.2759e-08	HomovsWT
CD55	1604	ENSG00000196352	chr1	-0.495089	5.59745	-8.6671	9.79264e-07	1.05726e-05	HeterovsWT		GSAP	54103	ENSG00000186088	chr7	-1.11643	4.08931	-12.5265	1.36947e-08	1.42968e-07	HomovsWT
SLC29A4	222962	ENSG00000164638	chr7	0.700929	3.96928	8.66231	9.853e-07	1.06293e-05	HeterovsWT		TMEM120A	83862	ENSG00000189077	chr7	-1.18077	4.38919	-12.6161	1.25742e-08	1.32595e-07	HomovsWT
TSPOAP1	9256	ENSG00000005379	chr17	1.3843	2.35709	8.6615	9.86323e-07	1.06319e-05	HeterovsWT		GVINP1	387751	ENSG00000254838	chr11	-1.51931	3.52356	-12.4701	1.44557e-08	1.49761e-07	HomovsWT
ZNF136	7695	ENSG00000196646	chr19	0.931349	3.66576	8.65895	9.89566e-07	1.06584e-05	HeterovsWT		PAX5	5079	ENSG00000196092	chr9	-0.887449	4.81142	-12.6747	1.18947e-08	1.26709e-07	HomovsWT
SPC25	57405	ENSG00000152253	chr2	0.566107	5.572	8.65688	9.92202e-07	1.06755e-05	HeterovsWT		KAT14	57325	ENSG00000149474	chr20	-0.901349	4.98235	-12.6916	1.17058e-08	1.25211e-07	HomovsWT
PHF8	23133	ENSG00000172943	chrX	-0.440702	6.35046	-8.65631	9.92931e-07	1.06755e-05	HeterovsWT		ACTN4	81	ENSG00000282844	chr19	0.567537	8.95363	13.0605	8.29447e-09	9.48278e-08	HomovsWT
AP2B1	163	ENSG00000006125	chr17	0.369993	7.68611	8.65586	9.93506e-07	1.06755e-05	HeterovsWT		IREB2	3658	ENSG00000136381	chr15	-0.677415	8.12054	-13.0209	8.60363e-09	9.77862e-08	HomovsWT
RALGAPA1	253959	ENSG00000174373	chr14	-0.570734	5.81406	-8.65208	9.98344e-07	1.0719e-05	HeterovsWT		NUP43	348995	ENSG00000120253	chr6	-0.612749	7.23005	-12.959	9.11159e-09	1.02127e-07	HomovsWT
DDX3X	1654	ENSG00000215301	chrX	-0.386688	8.63641	-8.65085	9.99915e-07	1.07274e-05	HeterovsWT		CD300H	100130520	ENSG00000284690	chr17	3.94477	-0.424314	12.4147	1.52462e-08	1.55578e-07	HomovsWT
FERMT1	55612	ENSG00000101311	chr20	-0.523514	5.85921	-8.64975	1.00133e-06	1.07297e-05	HeterovsWT		MFSD14C	84278	ENSG00000196312	chr9	0.676479	6.49717	12.8917	9.70088e-09	1.07821e-07	HomovsWT
CTDP1	9150	ENSG00000060069	chr18	0.725849	6.77271	8.64884	1.0025e-06	1.07297e-05	HeterovsWT		NIFK-AS1	254128	ENSG00000236859	chr2	-0.952432	4.85494	-12.6494	1.21827e-08	1.29371e-07	HomovsWT
JAK3	3718	ENSG00000105639	chr19	-0.426828	6.69137	-8.6491	1.00218e-06	1.07297e-05	HeterovsWT		ADPGK	83440	ENSG00000159322	chr15	-0.657661	7.71304	-12.9808	8.92929e-09	1.00479e-07	HomovsWT
MINAR1	23251	ENSG00000169330	chr15	-0.772129	3.60456	-8.64089	1.01281e-06	1.08229e-05	HeterovsWT		EMC10	284361	ENSG00000161671	chr19	4.85941	0.334431	12.7812	1.0758e-08	1.16627e-07	HomovsWT
MAP4K2	5871	ENSG00000168067	chr11	0.691929	6.14474	8.64096	1.01272e-06	1.08229e-05	HeterovsWT		AMOTL1	154810	ENSG00000166025	chr11	0.73612	5.64762	12.7649	1.09235e-08	1.18123e-07	HomovsWT
ALOX5AP	241	ENSG00000132965	chr13	-0.742482	4.83778	-8.63974	1.01431e-06	1.08304e-05	HeterovsWT		NMI	9111	ENSG00000123609	chr2	-0.917855	5.68988	-12.7613	1.09611e-08	1.18436e-07	HomovsWT
LPAR2	9170	ENSG00000064547	chr19	-0.756167	4.6553	-8.63174	1.02481e-06	1.0934e-05	HeterovsWT		MED23	9439	ENSG00000112282	chr6	-0.77253	6.23397	-12.8215	1.03584e-08	1.13458e-07	HomovsWT
POFUT1	23509	ENSG00000101346	chr20	0.357333	8.45795	8.63015	1.02691e-06	1.09478e-05	HeterovsWT		PIR	8544	ENSG00000087842	chrX	-1.37137	3.90285	-12.4217	1.51438e-08	1.55116e-07	HomovsWT
BIRC3	330	ENSG00000023445	chr11	-1.56264	1.828	-8.6284	1.02923e-06	1.09639e-05	HeterovsWT		MCM10	55388	ENSG00000065328	chr10	0.686897	6.12474	12.8135	1.04368e-08	1.13949e-07	HomovsWT
YTHDC2	64848	ENSG00000047188	chr5	-0.452942	6.43514	-8.62102	1.03906e-06	1.10599e-05	HeterovsWT		AC013652.1	NA	NA	chr15	-3.85656	-0.610603	-12.6901	1.17229e-08	1.25272e-07	HomovsWT
CASP2	835	ENSG00000106144	chr7	0.381986	7.3519	8.60935	1.05481e-06	1.12189e-05	HeterovsWT		TIPRL	261726	ENSG00000143155	chr1	-0.939388	6.60365	-12.8574	1.0016e-08	1.10599e-07	HomovsWT
ELOVL7	79993	ENSG00000164181	chr5	-1.1564	3.38998	-8.60828	1.05628e-06	1.12253e-05	HeterovsWT		RIOX2	84864	ENSG00000170854	chr3	-0.755925	5.78029	-12.7529	1.10483e-08	1.19188e-07	HomovsWT
PIGK	10026	ENSG00000142892	chr1	-0.490151	6.80331	-8.60709	1.05789e-06	1.12253e-05	HeterovsWT		ZFX	7543	ENSG00000005889	chrX	-0.619884	6.74429	-12.8684	9.91372e-09	1.09648e-07	HomovsWT
GBE1	2632	ENSG00000114480	chr3	0.403751	7.63476	8.60759	1.05722e-06	1.12253e-05	HeterovsWT		CCDC88B	283234	ENSG00000168071	chr11	1.73118	5.6093	12.7026	1.15842e-08	1.24377e-07	HomovsWT
SLC22A18AS	5003	ENSG00000254827	chr11	-1.42244	1.58613	-8.60242	1.06429e-06	1.12843e-05	HeterovsWT		ATP6AP2	10159	ENSG00000182220	chrX	-0.694283	7.26016	-12.9057	9.57449e-09	1.06766e-07	HomovsWT
ABHD11	83451	ENSG00000106077	chr7	-0.934925	3.84906	-8.59239	1.07816e-06	1.13957e-05	HeterovsWT		KCNK15-AS1	106144538	NA	chr20	-4.3816	-0.0361512	-12.4376	1.49143e-08	1.53343e-07	HomovsWT
ATG14	22863	ENSG00000126775	chr14	0.617711	3.97092	8.59329	1.07691e-06	1.13957e-05	HeterovsWT		MLH3	27030	ENSG00000119684	chr14	1.41557	2.52829	12.1933	1.8903e-08	1.84839e-07	HomovsWT
KLHL17	339451	ENSG00000187961	chr1	1.0409	4.63363	8.59244	1.07809e-06	1.13957e-05	HeterovsWT		AP2M1	1173	ENSG00000161203	chr3	-0.639105	7.31676	-12.8754	9.84918e-09	1.09201e-07	HomovsWT
PAX5	5079	ENSG00000196092	chr9	-0.581361	4.81142	-8.59262	1.07784e-06	1.13957e-05	HeterovsWT		AC092723.4	NA	NA	chr16	-2.20055	1.90269	-12.0625	2.14958e-08	2.05603e-07	HomovsWT
AL050309.1	NA	NA	chrX	-3.09701	-0.0853741	-8.58638	1.08657e-06	1.14668e-05	HeterovsWT		LRMDA	83938	ENSG00000148655	chr10	-0.546884	9.41184	-12.9863	8.88367e-09	1.00131e-07	HomovsWT
CA5B	11238	ENSG00000169239	chrX	-0.784534	4.89346	-8.58683	1.08594e-06	1.14668e-05	HeterovsWT		CTCF	10664	ENSG00000102974	chr16	0.594186	6.56784	12.8165	1.04069e-08	1.13806e-07	HomovsWT
JADE3	9767	ENSG00000102221	chrX	-0.56277	5.80347	-8.5835	1.09062e-06	1.15006e-05	HeterovsWT		LEPR	3953	ENSG00000116678	chr1	-0.915721	5.26037	-12.6229	1.24926e-08	1.31838e-07	HomovsWT
ZFAND6	54469	ENSG00000086666	chr15	-0.627648	6.27392	-8.57988	1.09573e-06	1.15456e-05	HeterovsWT		GTF2IP4	100093631	ENSG00000233369	chr7	0.684538	6.20043	12.8049	1.05214e-08	1.14689e-07	HomovsWT
PIP4P2	55529	ENSG00000155099	chr8	-0.856437	3.56968	-8.57669	1.10026e-06	1.15754e-05	HeterovsWT		SLC45A3	85414	ENSG00000158715	chr1	-1.33719	4.03885	-12.3924	1.55779e-08	1.58605e-07	HomovsWT
AC087632.2	NA	NA	chr15	0.496131	5.35632	8.5772	1.09955e-06	1.15754e-05	HeterovsWT		SUMF1	285362	ENSG00000144455	chr3	0.625207	6.65269	12.8013	1.05567e-08	1.14796e-07	HomovsWT
PDCL3	79031	ENSG00000115539	chr2	0.656229	4.00237	8.57322	1.10522e-06	1.16185e-05	HeterovsWT		CAMKK1	84254	ENSG00000004660	chr17	-1.2131	3.56271	-12.2892	1.72161e-08	1.72186e-07	HomovsWT
NEDD9	4739	ENSG00000111859	chr6	-0.660058	4.5424	-8.57178	1.10728e-06	1.16311e-05	HeterovsWT		LIG1	3978	ENSG00000105486	chr19	0.783774	7.24506	12.8468	1.01165e-08	1.11351e-07	HomovsWT
MCEMP1	199675	ENSG00000183019	chr19	-1.00982	3.83415	-8.5711	1.10826e-06	1.16324e-05	HeterovsWT		PRRC2B	84726	ENSG00000288701	chr9	0.600651	8.79724	12.922	9.43014e-09	1.05242e-07	HomovsWT
SPTBN1	6711	ENSG00000115306	chr2	0.382559	8.10922	8.5686	1.11185e-06	1.16611e-05	HeterovsWT		IL21R	50615	ENSG00000103522	chr16	-1.88619	1.98603	-12.0626	2.14949e-08	2.05603e-07	HomovsWT
CAMKMT	79823	ENSG00000143919	chr2	-0.510087	6.45369	-8.56663	1.11469e-06	1.16763e-05	HeterovsWT		ADGRE4P	326342	ENSG00000268758	chr19	-5.74066	-1.68346	-13.1261	7.80884e-09	9.03405e-08	HomovsWT
SMAD2	4087	ENSG00000175387	chr18	0.611935	8.07237	8.5664	1.11501e-06	1.16763e-05	HeterovsWT		ZNF792	126375	ENSG00000180884	chr19	4.81484	0.733137	12.2434	1.80001e-08	1.7832e-07	HomovsWT
CYP1B1-AS1	285154	ENSG00000232973	chr2	-1.02532	2.49703	-8.56551	1.1163e-06	1.16807e-05	HeterovsWT		CLIC2	1193	ENSG00000155962	chrX	-1.50234	1.98681	-12.0661	2.14214e-08	2.0518e-07	HomovsWT
ERBIN	55914	ENSG00000112851	chr5	0.552363	8.02691	8.56472	1.11745e-06	1.16838e-05	HeterovsWT		RXRA	6256	ENSG00000186350	chr9	0.838546	8.16741	12.8657	9.93861e-09	1.09834e-07	HomovsWT
FAM120C	54954	ENSG00000184083	chrX	-0.484482	5.77429	-8.56326	1.11956e-06	1.16968e-05	HeterovsWT		B9D1	27077	ENSG00000108641	chr17	-1.59079	2.81369	-12.0806	2.11165e-08	2.02878e-07	HomovsWT
TOP3A	7156	ENSG00000177302	chr17	0.425207	6.93292	8.55954	1.12497e-06	1.17444e-05	HeterovsWT		MAPKAPK2	9261	ENSG00000162889	chr1	-0.699337	7.67308	-12.8216	1.03578e-08	1.13458e-07	HomovsWT
APOLD1	81575	ENSG00000178878	chr12	0.455947	6.87672	8.55507	1.13151e-06	1.18035e-05	HeterovsWT		UBE2Q2P1	388165	ENSG00000189136	chr15	-1.15611	3.59744	-12.2572	1.77607e-08	1.76461e-07	HomovsWT
AC246817.2	NA	NA	chr8	-0.581841	4.96692	-8.55233	1.13554e-06	1.18364e-05	HeterovsWT		LINC00265	349114	NA	chr7	1.00261	4.10139	12.3668	1.5968e-08	1.62091e-07	HomovsWT
PRELID3B	51012	ENSG00000101166	chr20	-0.432428	6.8131	-8.54856	1.14109e-06	1.18852e-05	HeterovsWT		C1orf131	128061	ENSG00000143633	chr1	-1.18669	3.841	-12.2902	1.71983e-08	1.72186e-07	HomovsWT
FRY	10129	ENSG00000073910	chr13	-0.550854	6.45145	-8.54489	1.14653e-06	1.19236e-05	HeterovsWT		EIF1AX	1964	ENSG00000173674	chrX	-0.732381	7.60051	-12.8089	1.04814e-08	1.14344e-07	HomovsWT
EZH2	2146	ENSG00000106462	chr7	0.396263	7.33428	8.5449	1.14652e-06	1.19236e-05	HeterovsWT		RFX5	5993	ENSG00000143390	chr1	-0.672633	6.17138	-12.6467	1.22136e-08	1.29598e-07	HomovsWT
NRP1	8829	ENSG00000099250	chr10	-0.711861	4.1185	-8.5384	1.15623e-06	1.20153e-05	HeterovsWT		MMP25	64386	ENSG00000008516	chr16	0.94421	4.70621	12.4353	1.49466e-08	1.53559e-07	HomovsWT
CUX2	23316	ENSG00000111249	chr12	-0.601856	3.75964	-8.53691	1.15847e-06	1.20293e-05	HeterovsWT		EFR3B	22979	ENSG00000084710	chr2	-1.11776	3.24767	-12.2015	1.87523e-08	1.84027e-07	HomovsWT
AC015687.1	NA	NA	chr8	2.18825	-0.0753977	8.53539	1.16075e-06	1.20438e-05	HeterovsWT		NIPSNAP3B	55335	ENSG00000165028	chr9	-2.57081	2.12057	-11.9269	2.45917e-08	2.31305e-07	HomovsWT
PGRMC1	10857	ENSG00000101856	chrX	-0.432014	6.94324	-8.53185	1.16611e-06	1.20902e-05	HeterovsWT		NEK11	79858	ENSG00000114670	chr3	1.57276	3.2866	12.1736	1.92704e-08	1.8789e-07	HomovsWT
RPS6KA2	6196	ENSG00000071242	chr6	-0.377558	6.39893	-8.52881	1.17072e-06	1.21287e-05	HeterovsWT		SMG6	23293	ENSG00000070366	chr17	0.696913	5.84261	12.5897	1.28935e-08	1.35541e-07	HomovsWT
KCNK15-AS1	106144538	NA	chr20	-1.88042	-0.0361512	-8.52694	1.17357e-06	1.2149e-05	HeterovsWT		SOX13	9580	ENSG00000143842	chr1	-1.01999	4.30245	-12.3267	1.66003e-08	1.67507e-07	HomovsWT
POMK	84197	ENSG00000185900	chr8	0.615856	5.21523	8.52147	1.18193e-06	1.22262e-05	HeterovsWT		CTDP1	9150	ENSG00000060069	chr18	1.05032	6.77271	12.6815	1.18185e-08	1.26095e-07	HomovsWT
LRRC42	115353	ENSG00000116212	chr1	0.619393	5.20885	8.51512	1.19174e-06	1.23182e-05	HeterovsWT		FAM172A	83989	ENSG00000113391	chr5	-0.971372	6.27643	-12.6377	1.23188e-08	1.3051e-07	HomovsWT
SPATC1	375686	ENSG00000186583	chr8	-1.36089	2.66043	-8.51261	1.19563e-06	1.23361e-05	HeterovsWT		SNX5	27131	ENSG00000089006	chr20	-0.564967	7.09968	-12.7167	1.14317e-08	1.23032e-07	HomovsWT
MAPK3	5595	ENSG00000102882	chr16	0.531133	4.99787	8.51225	1.19619e-06	1.23361e-05	HeterovsWT		BARX1	56033	ENSG00000131668	chr9	-1.34218	4.95492	-12.428	1.50531e-08	1.54419e-07	HomovsWT
POP7	10248	ENSG00000172336	chr7	-0.987693	5.05476	-8.51315	1.19479e-06	1.23361e-05	HeterovsWT		FAM214A	56204	ENSG00000047346	chr15	-1.1698	4.44414	-12.3387	1.6408e-08	1.65937e-07	HomovsWT
PDE2A	5138	ENSG00000186642	chr11	-2.1233	0.159361	-8.50344	1.20999e-06	1.24507e-05	HeterovsWT		LIN52	91750	ENSG00000205659	chr14	0.768973	5.24061	12.4735	1.44079e-08	1.49494e-07	HomovsWT
MYCL	4610	ENSG00000116990	chr1	1.3154	2.19616	8.50414	1.20889e-06	1.24507e-05	HeterovsWT		CCNI	10983	ENSG00000118816	chr4	0.563423	8.83573	12.8028	1.05414e-08	1.14796e-07	HomovsWT
SLC35E2B	728661	ENSG00000189339	chr1	0.535923	7.45048	8.5034	1.21005e-06	1.24507e-05	HeterovsWT		RFX7	64864	ENSG00000181827	chr15	-0.946837	7.08114	-12.6938	1.16815e-08	1.25211e-07	HomovsWT
EVI5L	115704	ENSG00000142459	chr19	-0.669028	4.98854	-8.4992	1.21668e-06	1.24949e-05	HeterovsWT		MOSPD2	158747	ENSG00000130150	chrX	-1.02738	5.04787	-12.4395	1.48872e-08	1.5318e-07	HomovsWT
TTC19	54902	ENSG00000011295	chr17	-0.418609	6.77379	-8.49893	1.2171e-06	1.24949e-05	HeterovsWT		GIPC3	126326	ENSG00000179855	chr19	-6.44542	-1.45071	-12.8996	9.62909e-09	1.07287e-07	HomovsWT
PIK3CD	5293	ENSG00000171608	chr1	0.457136	8.69112	8.49915	1.21675e-06	1.24949e-05	HeterovsWT		DFFA	1676	ENSG00000160049	chr1	0.648637	6.33655	12.6054	1.27032e-08	1.33852e-07	HomovsWT
CBS	875	ENSG00000160200	chr21	-0.845079	2.97453	-8.49753	1.21932e-06	1.25082e-05	HeterovsWT		DONSON	29980	ENSG00000159147	chr21	1.00979	5.29093	12.4575	1.4632e-08	1.51127e-07	HomovsWT
MYO7A	4647	ENSG00000137474	chr11	-0.676495	4.72383	-8.49651	1.22095e-06	1.25154e-05	HeterovsWT		PAPLN	89932	ENSG00000100767	chr14	-1.28379	4.30106	-12.2162	1.84848e-08	1.8206e-07	HomovsWT
TMX3	54495	ENSG00000166479	chr18	0.461197	7.26787	8.49281	1.22686e-06	1.25665e-05	HeterovsWT		SSB	6741	ENSG00000138385	chr2	-0.963519	6.10631	-12.5523	1.33614e-08	1.40135e-07	HomovsWT
SLC12A2	6558	ENSG00000064651	chr5	-0.682011	5.3674	-8.49133	1.22922e-06	1.25717e-05	HeterovsWT		FABP5	2171	ENSG00000164687	chr8	-0.914583	5.48783	-12.4649	1.45282e-08	1.50169e-07	HomovsWT
WSB1	26118	ENSG00000109046	chr17	0.383699	6.58763	8.49178	1.2285e-06	1.25717e-05	HeterovsWT		CHD8	57680	ENSG00000100888	chr14	0.546234	7.13146	12.6559	1.21076e-08	1.28674e-07	HomovsWT
PRKRIP1	79706	ENSG00000128563	chr7	0.635093	5.44823	8.48493	1.23952e-06	1.26485e-05	HeterovsWT		JUP	3728	ENSG00000173801	chr17	1.51126	3.62287	12.0294	2.22112e-08	2.117e-07	HomovsWT
EPB41L3	23136	ENSG00000082397	chr18	-0.63269	5.6366	-8.48539	1.23877e-06	1.26485e-05	HeterovsWT		B2M	567	ENSG00000166710	chr15	-0.585707	9.92796	-12.781	1.07593e-08	1.16627e-07	HomovsWT
VPS52	6293	ENSG00000228425	chr6	0.472115	5.66021	8.48529	1.23894e-06	1.26485e-05	HeterovsWT		MREG	55686	ENSG00000118242	chr2	0.863123	3.98521	12.2306	1.82259e-08	1.80004e-07	HomovsWT
LYRM7	90624	ENSG00000186687	chr5	-0.592443	5.33297	-8.47996	1.24758e-06	1.27212e-05	HeterovsWT		TREM1	54210	ENSG00000124731	chr6	-4.33541	-0.669899	-12.2564	1.77734e-08	1.76461e-07	HomovsWT
SH3PXD2B	285590	ENSG00000174705	chr5	0.773478	4.8984	8.47486	1.25591e-06	1.27965e-05	HeterovsWT		AC010601.1	NA	NA	chr16	-6.68641	-2.52376	-12.8523	1.0064e-08	1.11039e-07	HomovsWT
ZC3H12B	340554	ENSG00000102053	chrX	-1.34479	2.21901	-8.47264	1.25954e-06	1.28239e-05	HeterovsWT		JADE3	9767	ENSG00000102221	chrX	-0.840789	5.80347	-12.4887	1.41999e-08	1.47561e-07	HomovsWT
MS4A6A	64231	ENSG00000110077	chr11	-1.28078	2.10125	-8.4672	1.26852e-06	1.29057e-05	HeterovsWT		COG2	22796	ENSG00000135775	chr1	-0.679372	6.16019	-12.5232	1.37381e-08	1.43092e-07	HomovsWT
C5orf66	NA	NA	chr5	-0.830208	3.38026	-8.46215	1.27691e-06	1.29813e-05	HeterovsWT		AC138393.1	NA	NA	chr1	-0.832361	4.10552	-12.2111	1.8577e-08	1.82703e-07	HomovsWT
LYPLAL1	127018	ENSG00000143353	chr1	-0.541612	5.35126	-8.45508	1.28876e-06	1.30822e-05	HeterovsWT		MINAR1	23251	ENSG00000169330	chr15	-1.14707	3.60456	-12.1213	2.02864e-08	1.96386e-07	HomovsWT
NUP50	10762	ENSG00000093000	chr22	0.417041	6.69953	8.45516	1.28863e-06	1.30822e-05	HeterovsWT		FCHSD1	89848	ENSG00000197948	chr5	-0.959321	3.93238	-12.1475	1.97716e-08	1.92362e-07	HomovsWT
AC091563.1	NA	NA	chr8	-1.21848	2.28582	-8.44719	1.30213e-06	1.3208e-05	HeterovsWT		SRF	6722	ENSG00000112658	chr6	-0.729508	6.97625	-12.5991	1.27794e-08	1.34446e-07	HomovsWT
CSMD1	64478	ENSG00000183117	chr8	-1.61136	1.76418	-8.44253	1.31009e-06	1.32788e-05	HeterovsWT		VAC14	55697	ENSG00000103043	chr16	0.661269	6.89455	12.5801	1.30118e-08	1.36573e-07	HomovsWT
BDH1	622	ENSG00000161267	chr3	-0.445579	6.84521	-8.43908	1.31602e-06	1.3329e-05	HeterovsWT		SEPTIN9	10801	ENSG00000184640	chr17	0.783655	6.96818	12.5882	1.29128e-08	1.35639e-07	HomovsWT
USP21	27005	ENSG00000143258	chr1	0.563352	5.30706	8.43407	1.32468e-06	1.34067e-05	HeterovsWT		EHD1	10938	ENSG00000110047	chr11	0.669675	6.56199	12.5507	1.33823e-08	1.40245e-07	HomovsWT
PLCL2	23228	ENSG00000284017	chr3	-0.589327	5.94784	-8.43232	1.32772e-06	1.34274e-05	HeterovsWT		DDB2	1643	ENSG00000134574	chr11	0.660875	5.87282	12.4405	1.48725e-08	1.53145e-07	HomovsWT
GALNT7	51809	ENSG00000109586	chr4	0.450765	6.98553	8.42543	1.33976e-06	1.35311e-05	HeterovsWT		SV2B	9899	ENSG00000185518	chr15	-1.67244	2.31327	-11.8719	2.59806e-08	2.41911e-07	HomovsWT
UBXN7	26043	ENSG00000163960	chr3	-0.38841	7.23506	-8.42531	1.33996e-06	1.35311e-05	HeterovsWT		MGAT4B	11282	ENSG00000284501	chr5	1.19267	8.55373	12.6754	1.18861e-08	1.26709e-07	HomovsWT
ZNF438	220929	ENSG00000183621	chr10	-0.499828	7.18096	-8.4231	1.34385e-06	1.35603e-05	HeterovsWT		IL2RB	3560	ENSG00000100385	chr22	-4.11852	-0.43825	-12.2896	1.72081e-08	1.72186e-07	HomovsWT
AKAP7	9465	ENSG00000118507	chr6	-1.97413	-0.941184	-8.42147	1.34673e-06	1.35793e-05	HeterovsWT		AC019117.1	NA	NA	chr7	3.94654	-0.718918	12.308	1.69037e-08	1.69993e-07	HomovsWT
AL009179.2	NA	NA	chr6	1.09898	2.16592	8.40476	1.37657e-06	1.38698e-05	HeterovsWT		AC209154.1	NA	NA	chr17	-6.45324	-2.44954	-12.8014	1.05561e-08	1.14796e-07	HomovsWT
PYGB	5834	ENSG00000100994	chr20	-0.502361	6.65347	-8.40406	1.37783e-06	1.38722e-05	HeterovsWT		INTS13	55726	ENSG00000064102	chr12	-0.751954	6.03985	-12.4475	1.47727e-08	1.52465e-07	HomovsWT
RANBP3	8498	ENSG00000031823	chr19	-0.410362	6.49626	-8.39731	1.39011e-06	1.39855e-05	HeterovsWT		GPR137C	283554	ENSG00000180998	chr14	1.4477	2.7836	11.8913	2.54814e-08	2.37861e-07	HomovsWT
GOLM1	51280	ENSG00000135052	chr9	-0.493658	6.89358	-8.39631	1.39192e-06	1.39934e-05	HeterovsWT		CPXM1	56265	ENSG00000088882	chr20	1.42695	3.0533	11.8869	2.55948e-08	2.38756e-07	HomovsWT
STYXL1	51657	ENSG00000127952	chr7	-0.592375	5.51824	-8.39233	1.39923e-06	1.40565e-05	HeterovsWT		HIP1	3092	ENSG00000127946	chr7	-0.563352	7.36402	-12.6005	1.27627e-08	1.34374e-07	HomovsWT
SETDB1	9869	ENSG00000143379	chr1	0.419087	5.98599	8.39176	1.40028e-06	1.40566e-05	HeterovsWT		ZNF142	7701	ENSG00000115568	chr2	0.713625	5.28199	12.3403	1.63828e-08	1.65806e-07	HomovsWT
ATG4A	115201	ENSG00000101844	chrX	-0.928587	3.47758	-8.38545	1.41193e-06	1.41631e-05	HeterovsWT		BAZ1B	9031	ENSG00000009954	chr7	-0.568654	8.80268	-12.6424	1.22638e-08	1.30028e-07	HomovsWT
FDX1	2230	ENSG00000137714	chr11	-0.646331	5.03802	-8.3827	1.41706e-06	1.4204e-05	HeterovsWT		EFNB2	1948	ENSG00000125266	chr13	3.77687	0.836733	11.8036	2.78245e-08	2.55692e-07	HomovsWT
TK1	7083	ENSG00000167900	chr17	0.632371	6.03917	8.37945	1.42313e-06	1.42544e-05	HeterovsWT		FANCG	2189	ENSG00000221829	chr9	0.796872	5.94009	12.397	1.55086e-08	1.58018e-07	HomovsWT
MLLT6	4302	ENSG00000275851	chr17	0.450473	7.50676	8.37869	1.42455e-06	1.42581e-05	HeterovsWT		ZFAND6	54469	ENSG00000086666	chr15	-0.932704	6.27392	-12.4344	1.49601e-08	1.53582e-07	HomovsWT
AC064805.1	NA	NA	chr17	-3.10744	-0.542778	-8.37716	1.42741e-06	1.42762e-05	HeterovsWT		HSD17B10	3028	ENSG00000072506	chrX	-0.822644	6.58698	-12.465	1.4527e-08	1.50169e-07	HomovsWT
ZFAND5	7763	ENSG00000107372	chr9	-0.588522	5.97074	-8.37317	1.43494e-06	1.43409e-05	HeterovsWT		TRMT12	55039	ENSG00000183665	chr8	-1.21223	3.21484	-11.9817	2.32873e-08	2.2041e-07	HomovsWT
TNN	63923	ENSG00000120332	chr1	-0.457505	6.01458	-8.36824	1.44427e-06	1.44236e-05	HeterovsWT		MAP7D3	79649	ENSG00000129680	chrX	-0.894571	5.59325	-12.3546	1.61581e-08	1.63898e-07	HomovsWT
ZDHHC15	158866	ENSG00000102383	chrX	-2.72257	-0.325156	-8.36537	1.44973e-06	1.446e-05	HeterovsWT		AC090204.1	NA	NA	chr8	-7.21378	-0.88973	-12.5429	1.34822e-08	1.41075e-07	HomovsWT
ZNF846	162993	ENSG00000196605	chr19	-1.22992	1.28926	-8.36521	1.45004e-06	1.446e-05	HeterovsWT		NDE1	54820	ENSG00000072864	chr16	0.984974	6.19472	12.4112	1.5298e-08	1.55989e-07	HomovsWT
SLC6A8	6535	ENSG00000130821	chrX	-1.07289	1.83632	-8.3544	1.47085e-06	1.46567e-05	HeterovsWT		CARS2	79587	ENSG00000134905	chr13	-0.579493	7.56836	-12.5334	1.36051e-08	1.42251e-07	HomovsWT
PTP4A3	11156	ENSG00000184489	chr8	0.82745	6.0154	8.35139	1.47669e-06	1.47041e-05	HeterovsWT		FFAR2	2867	ENSG00000126262	chr19	1.84812	1.57381	11.7647	2.89369e-08	2.63772e-07	HomovsWT
DNAJC15	29103	ENSG00000120675	chr13	-0.912089	1.87428	-8.34682	1.48563e-06	1.47823e-05	HeterovsWT		NAA20	51126	ENSG00000173418	chr20	-0.747826	6.04171	-12.382	1.57359e-08	1.59974e-07	HomovsWT
PLXNB3	5365	ENSG00000198753	chrX	-1.19619	1.40344	-8.34003	1.499e-06	1.49015e-05	HeterovsWT		MGST1	4257	ENSG00000008394	chr12	-0.664359	7.01254	-12.4681	1.44835e-08	1.49935e-07	HomovsWT
RGS12	6002	ENSG00000159788	chr4	0.439745	7.44861	8.33962	1.49981e-06	1.49015e-05	HeterovsWT		OPA1	4976	ENSG00000198836	chr3	-0.64718	7.70335	-12.5317	1.36278e-08	1.42379e-07	HomovsWT
ZNF629	23361	ENSG00000102870	chr16	0.495096	6.19003	8.33891	1.50121e-06	1.49046e-05	HeterovsWT		AHCTF1	25909	ENSG00000153207	chr1	-0.609426	7.82946	-12.5238	1.37303e-08	1.43092e-07	HomovsWT
CCNI	10983	ENSG00000118816	chr4	0.368003	8.83573	8.33054	1.51789e-06	1.50592e-05	HeterovsWT		ATP2C2	9914	ENSG00000064270	chr16	-3.52548	0.33129	-12.0146	2.25405e-08	2.14237e-07	HomovsWT
LPIN2	9663	ENSG00000101577	chr18	0.419706	6.2691	8.32975	1.51947e-06	1.50638e-05	HeterovsWT		SLC9A6	10479	ENSG00000198689	chrX	-0.746365	5.58666	-12.3077	1.69092e-08	1.69993e-07	HomovsWT
ZNF792	126375	ENSG00000180884	chr19	3.42916	0.733137	8.32883	1.52132e-06	1.50712e-05	HeterovsWT		MMD	23531	ENSG00000108960	chr17	0.95935	4.76638	12.1769	1.92091e-08	1.87562e-07	HomovsWT
LGALS12	85329	ENSG00000133317	chr11	-0.442921	6.0735	-8.32807	1.52287e-06	1.50739e-05	HeterovsWT		ZNF862	643641	ENSG00000106479	chr7	0.725533	5.25989	12.2493	1.78979e-08	1.77437e-07	HomovsWT
WDR6	11180	ENSG00000178252	chr3	0.591495	7.64985	8.3276	1.52381e-06	1.50739e-05	HeterovsWT		ZNF236-DT	100131655	ENSG00000264278	chr18	0.9694	3.7202	11.9621	2.37454e-08	2.24138e-07	HomovsWT
GRIPAP1	56850	ENSG00000068400	chrX	-0.450809	5.63021	-8.31638	1.54656e-06	1.52878e-05	HeterovsWT		PI4K2A	55361	ENSG00000155252	chr10	-0.97327	3.96954	-12.0188	2.24465e-08	2.13643e-07	HomovsWT
ZNF317	57693	ENSG00000130803	chr19	-0.464972	5.85715	-8.31521	1.54897e-06	1.53005e-05	HeterovsWT		ADGRE1	2015	ENSG00000174837	chr19	1.5277	2.46768	11.7938	2.80985e-08	2.57861e-07	HomovsWT
UNKL	64718	ENSG00000059145	chr16	0.817089	4.83988	8.31446	1.55051e-06	1.53046e-05	HeterovsWT		PLEKHA3	65977	ENSG00000116095	chr2	-0.84635	5.43702	-12.237	1.81125e-08	1.7908e-07	HomovsWT
VAV3	10451	ENSG00000134215	chr1	-0.544874	6.97251	-8.31117	1.55726e-06	1.536e-05	HeterovsWT		ZNF674	641339	ENSG00000251192	chrX	-1.14552	3.24858	-11.8656	2.61452e-08	2.42723e-07	HomovsWT
FAM107B	83641	ENSG00000065809	chr10	-0.386532	8.27517	-8.30562	1.56875e-06	1.54621e-05	HeterovsWT		DIAPH1	1729	ENSG00000131504	chr5	0.528084	8.54507	12.5223	1.37504e-08	1.4311e-07	HomovsWT
RAPGEF6	51735	ENSG00000158987	chr5	-0.977643	3.63169	-8.30482	1.5704e-06	1.54672e-05	HeterovsWT		RIC3	79608	ENSG00000166405	chr11	-3.10703	0.568263	-11.6726	3.17625e-08	2.84001e-07	HomovsWT
IFI16	3428	ENSG00000163565	chr1	-0.792621	7.00035	-8.30226	1.57575e-06	1.55086e-05	HeterovsWT		MICAL3	57553	ENSG00000243156	chr22	0.665787	6.06372	12.3229	1.66606e-08	1.67867e-07	HomovsWT
MAFB	9935	ENSG00000204103	chr20	-1.98581	1.78119	-8.3008	1.5788e-06	1.55273e-05	HeterovsWT		AL035071.1	NA	NA	chr20	0.913026	4.49218	12.0961	2.07969e-08	2.00899e-07	HomovsWT
ADAMTSL4	54507	ENSG00000143382	chr1	0.898462	3.59297	8.29887	1.58283e-06	1.55557e-05	HeterovsWT		PORCN	64840	ENSG00000102312	chrX	-1.45355	3.54164	-11.9232	2.46833e-08	2.32006e-07	HomovsWT
CNR2	1269	ENSG00000188822	chr1	1.67412	2.34819	8.29758	1.58554e-06	1.55711e-05	HeterovsWT		DGKI	9162	ENSG00000157680	chr7	-4.41881	-0.295875	-11.962	2.37472e-08	2.24138e-07	HomovsWT
MELTF	4241	ENSG00000163975	chr3	-0.628206	4.88893	-8.29588	1.58912e-06	1.55949e-05	HeterovsWT		LTC4S	4056	ENSG00000283887	chr5	1.70338	3.39767	11.8439	2.67208e-08	2.47222e-07	HomovsWT
NET1	10276	ENSG00000173848	chr10	0.496944	6.37831	8.2829	1.61669e-06	1.58541e-05	HeterovsWT		GZF1	64412	ENSG00000125812	chr20	-0.678626	5.62972	-12.2571	1.7762e-08	1.76461e-07	HomovsWT
EYS	346007	ENSG00000188107	chr6	-1.18876	1.46004	-8.28199	1.61866e-06	1.58619e-05	HeterovsWT		EXPH5	23086	ENSG00000110723	chr11	-4.17913	0.599975	-11.9883	2.31351e-08	2.19275e-07	HomovsWT
RNF26	79102	ENSG00000173456	chr11	0.694541	5.54559	8.27419	1.63548e-06	1.60152e-05	HeterovsWT		PHF13	148479	ENSG00000116273	chr1	0.873211	5.88961	12.2565	1.77721e-08	1.76461e-07	HomovsWT
MBNL3	55796	ENSG00000076770	chrX	-0.963581	3.53634	-8.26904	1.64671e-06	1.61019e-05	HeterovsWT		KIAA0513	9764	ENSG00000135709	chr16	-0.976394	4.35457	-12.0176	2.24729e-08	2.13745e-07	HomovsWT
DZIP1L	199221	ENSG00000158163	chr3	0.512416	4.6825	8.26933	1.64608e-06	1.61019e-05	HeterovsWT		CCAR2	57805	ENSG00000158941	chr8	0.550637	7.49027	12.4248	1.50984e-08	1.54767e-07	HomovsWT
ATG4D	84971	ENSG00000130734	chr19	-0.759376	4.41478	-8.26178	1.66267e-06	1.62463e-05	HeterovsWT		PPARG	5468	ENSG00000132170	chr3	-0.692282	5.91568	-12.2894	1.72128e-08	1.72186e-07	HomovsWT
PRKAR2A	5576	ENSG00000114302	chr3	0.403707	7.41067	8.2597	1.66727e-06	1.62796e-05	HeterovsWT		BUD31	8896	ENSG00000106245	chr7	-0.887183	4.94405	-12.1433	1.98523e-08	1.93009e-07	HomovsWT
ZBTB4	57659	ENSG00000283868	chr17	0.5684	5.30921	8.25558	1.67643e-06	1.63455e-05	HeterovsWT		PIGA	5277	ENSG00000165195	chrX	-0.842377	4.69341	-12.0878	2.09658e-08	2.01956e-07	HomovsWT
RPTOR	57521	ENSG00000141564	chr17	0.405302	7.35122	8.25588	1.67575e-06	1.63455e-05	HeterovsWT		MTR	4548	ENSG00000116984	chr1	-0.516647	7.71876	-12.4193	1.51789e-08	1.55124e-07	HomovsWT
SLC25A46	91137	ENSG00000164209	chr5	-0.518441	6.55095	-8.25316	1.68182e-06	1.63863e-05	HeterovsWT		MRPS10	55173	ENSG00000048544	chr6	-0.678808	6.52629	-12.3171	1.67548e-08	1.6869e-07	HomovsWT
KDM4C	23081	ENSG00000107077	chr9	-0.471391	6.23213	-8.25163	1.68526e-06	1.6408e-05	HeterovsWT		ARFGEF3	57221	ENSG00000112379	chr6	-1.07019	4.43272	-12.081	2.11072e-08	2.02878e-07	HomovsWT
SLC26A6	65010	ENSG00000225697	chr3	0.588409	6.43317	8.24714	1.69535e-06	1.64944e-05	HeterovsWT		TRIOBP	11078	ENSG00000100106	chr22	0.773788	6.28852	12.2857	1.72741e-08	1.72453e-07	HomovsWT
CLBA1	122616	ENSG00000140104	chr14	0.78955	4.08924	8.24491	1.70039e-06	1.65198e-05	HeterovsWT		FSIP1	161835	ENSG00000150667	chr15	-1.69856	1.8312	-11.564	3.54786e-08	3.12092e-07	HomovsWT
AMOTL1	154810	ENSG00000166025	chr11	0.483811	5.64762	8.24542	1.69924e-06	1.65198e-05	HeterovsWT		KLHL7	55975	ENSG00000122550	chr7	0.606643	5.69375	12.2046	1.86959e-08	1.83607e-07	HomovsWT
ZNF658	26149	ENSG00000274349	chr9	-0.945028	2.03238	-8.24225	1.7064e-06	1.65545e-05	HeterovsWT		BDH1	622	ENSG00000161267	chr3	-0.659274	6.84521	-12.3236	1.66498e-08	1.67867e-07	HomovsWT
RSBN1L	222194	ENSG00000187257	chr7	-0.489025	7.24086	-8.24236	1.70616e-06	1.65545e-05	HeterovsWT		SNX12	29934	ENSG00000147164	chrX	-0.740753	5.99841	-12.2369	1.81154e-08	1.7908e-07	HomovsWT
CEP192	55125	ENSG00000101639	chr18	0.358883	7.86609	8.24159	1.70792e-06	1.65574e-05	HeterovsWT		ANKRD36	375248	ENSG00000135976	chr2	-0.703694	7.43628	-12.3503	1.62257e-08	1.64338e-07	HomovsWT
SYNRG	11276	ENSG00000275066	chr17	0.468514	5.77583	8.23877	1.71434e-06	1.66078e-05	HeterovsWT		TSC22D4	81628	ENSG00000166925	chr7	-0.820777	7.41683	-12.3682	1.59467e-08	1.61995e-07	HomovsWT
NLN	57486	ENSG00000123213	chr5	0.538899	7.82204	8.23666	1.71916e-06	1.66427e-05	HeterovsWT		GYPC	2995	ENSG00000136732	chr2	-0.764465	6.24455	-12.2499	1.78874e-08	1.77437e-07	HomovsWT
FAM241A	132720	ENSG00000174749	chr4	-0.955736	3.6454	-8.23435	1.72445e-06	1.66819e-05	HeterovsWT		ERMARD	55780	ENSG00000276187	chr6	-0.765883	5.27432	-12.0953	2.08133e-08	2.00914e-07	HomovsWT
LMBRD1	55788	ENSG00000168216	chr6	-0.727574	4.98644	-8.23317	1.72717e-06	1.66964e-05	HeterovsWT		TRMT1L	81627	ENSG00000121486	chr1	-0.72007	5.67046	-12.1571	1.9586e-08	1.90693e-07	HomovsWT
RAD54L	8438	ENSG00000085999	chr1	0.54041	5.55745	8.23137	1.73131e-06	1.67245e-05	HeterovsWT		SLC10A3	8273	ENSG00000126903	chrX	-1.02786	4.19726	-11.9476	2.40904e-08	2.27219e-07	HomovsWT
NLE1	54475	ENSG00000073536	chr17	0.463365	5.63427	8.23058	1.73314e-06	1.67303e-05	HeterovsWT		ALG1L6P	339879	NA	chr3	-0.991464	3.93145	-11.8813	2.57394e-08	2.3994e-07	HomovsWT
STON2	85439	ENSG00000140022	chr14	3.52925	-1.32272	8.22957	1.73547e-06	1.67409e-05	HeterovsWT		NEDD4L	23327	ENSG00000049759	chr18	0.76695	6.06106	12.1904	1.89573e-08	1.85236e-07	HomovsWT
STMN3	50861	ENSG00000197457	chr20	-0.635362	5.23861	-8.22886	1.73711e-06	1.67448e-05	HeterovsWT		LPAR2	9170	ENSG00000064547	chr19	-1.09678	4.6553	-12.0066	2.27198e-08	2.15791e-07	HomovsWT
FAM172A	83989	ENSG00000113391	chr5	-0.613516	6.27643	-8.22046	1.75668e-06	1.69214e-05	HeterovsWT		FNIP2	57600	ENSG00000052795	chr4	0.632125	6.17566	12.2293	1.82495e-08	1.80004e-07	HomovsWT
SPTBN2	6712	ENSG00000173898	chr11	2.25582	0.751823	8.21844	1.7614e-06	1.69549e-05	HeterovsWT		STMN3	50861	ENSG00000197457	chr20	-0.966214	5.23861	-12.09	2.09204e-08	2.01662e-07	HomovsWT
RIMS3	9783	ENSG00000117016	chr1	0.516844	6.11486	8.21662	1.7657e-06	1.69842e-05	HeterovsWT		HECTD4	283450	ENSG00000173064	chr12	0.551838	6.88423	12.2971	1.7084e-08	1.71623e-07	HomovsWT
PJA1	64219	ENSG00000181191	chrX	-0.813012	2.94279	-8.21171	1.77729e-06	1.70836e-05	HeterovsWT		HSP90AA1	3320	ENSG00000080824	chr14	0.728123	9.58964	12.4198	1.51723e-08	1.55124e-07	HomovsWT
FBXO36	130888	ENSG00000153832	chr2	1.21749	2.28917	8.21057	1.78e-06	1.70976e-05	HeterovsWT		PTK2B	2185	ENSG00000120899	chr8	0.583991	8.26984	12.3521	1.61966e-08	1.64166e-07	HomovsWT
INPP5B	3633	ENSG00000204084	chr1	0.40598	7.09307	8.20233	1.79969e-06	1.72745e-05	HeterovsWT		TWISTNB	NA	NA	chr7	0.734097	6.81824	12.2635	1.76521e-08	1.759e-07	HomovsWT
MYLK	4638	ENSG00000065534	chr3	1.20317	1.76585	8.19687	1.81286e-06	1.73886e-05	HeterovsWT		PRRT4	401399	ENSG00000224940	chr7	-0.868053	5.44987	-12.0735	2.12641e-08	2.04105e-07	HomovsWT
AC005258.1	NA	NA	chr19	-0.656209	4.45474	-8.19621	1.81445e-06	1.73916e-05	HeterovsWT		IQCJ-SCHIP1	100505385	ENSG00000283154	chr3	0.978883	3.37189	11.7683	2.88297e-08	2.63148e-07	HomovsWT
ME2	4200	ENSG00000082212	chr18	0.406091	8.01818	8.19258	1.82329e-06	1.7464e-05	HeterovsWT		PARP6	56965	ENSG00000137817	chr15	-0.963564	5.46844	-12.0705	2.13273e-08	2.04568e-07	HomovsWT
ICAM3	3385	ENSG00000076662	chr19	1.19906	2.55082	8.18322	1.84626e-06	1.76715e-05	HeterovsWT		CCDC84	NA	NA	chr11	0.834336	4.32631	11.8945	2.54001e-08	2.37266e-07	HomovsWT
SERPINE1	5054	ENSG00000106366	chr7	-1.83882	-0.317239	-8.17963	1.85513e-06	1.77439e-05	HeterovsWT		CNR2	1269	ENSG00000188822	chr1	2.23457	2.34819	11.4984	3.79506e-08	3.29569e-07	HomovsWT
CPQ	10404	ENSG00000104324	chr8	-0.550825	5.41256	-8.17515	1.86631e-06	1.78301e-05	HeterovsWT		HDAC9	9734	ENSG00000048052	chr7	4.77005	0.294184	11.7788	2.85287e-08	2.61456e-07	HomovsWT
SARS	NA	NA	chr1	-0.428587	6.81738	-8.17443	1.86808e-06	1.78301e-05	HeterovsWT		NBPF14	25832	ENSG00000270629	chr1	-0.707579	5.25476	-12.0268	2.22687e-08	2.12099e-07	HomovsWT
CAPN2	824	ENSG00000162909	chr1	-0.457959	7.49624	-8.17469	1.86744e-06	1.78301e-05	HeterovsWT		LINC01622	285768	ENSG00000286785	chr6	-6.48259	-1.92909	-12.336	1.64506e-08	1.66244e-07	HomovsWT
HIST2H2AC	NA	NA	chr1	0.452895	8.36988	8.16736	1.88586e-06	1.79872e-05	HeterovsWT		PITPNC1	26207	ENSG00000154217	chr17	-0.581313	6.8847	-12.2368	1.81163e-08	1.7908e-07	HomovsWT
KDM5B	10765	ENSG00000117139	chr1	0.326707	7.93049	8.16575	1.88993e-06	1.80134e-05	HeterovsWT		PACS2	23241	ENSG00000179364	chr14	0.763841	7.02374	12.23	1.82366e-08	1.80004e-07	HomovsWT
EIF2S3	1968	ENSG00000130741	chrX	-0.42187	9.09172	-8.16145	1.90084e-06	1.81047e-05	HeterovsWT		APOLD1	81575	ENSG00000178878	chr12	0.645956	6.87672	12.2143	1.85196e-08	1.82271e-07	HomovsWT
AL136181.1	NA	NA	chr10	-1.62935	0.37888	-8.1602	1.90405e-06	1.81225e-05	HeterovsWT		AC124944.2	NA	NA	chr3	-1.13167	3.94418	-11.8062	2.77514e-08	2.55539e-07	HomovsWT
MGLL	11343	ENSG00000074416	chr3	0.363266	6.93517	8.15634	1.91392e-06	1.82037e-05	HeterovsWT		CIAO2A	84191	ENSG00000166797	chr15	-1.03763	6.81119	-12.1953	1.88662e-08	1.84612e-07	HomovsWT
HECTD3	79654	ENSG00000126107	chr1	0.586659	5.51496	8.15104	1.92756e-06	1.83167e-05	HeterovsWT		AC135782.1	NA	NA	chr16	-1.24987	3.4623	-11.682	3.14593e-08	2.81847e-07	HomovsWT
FCHO1	23149	ENSG00000130475	chr19	-0.444647	6.14375	-8.15068	1.9285e-06	1.83167e-05	HeterovsWT		GLRX2	51022	ENSG00000023572	chr1	-1.01745	4.34686	-11.8634	2.62037e-08	2.431e-07	HomovsWT
PYHIN1	149628	ENSG00000163564	chr1	-1.46568	0.917664	-8.1451	1.94301e-06	1.84416e-05	HeterovsWT		RTN4RL1	146760	ENSG00000185924	chr17	-6.73298	-1.12527	-12.2178	1.84553e-08	1.81901e-07	HomovsWT
FASN	2194	ENSG00000169710	chr17	0.632229	10.3905	8.14383	1.94631e-06	1.846e-05	HeterovsWT		BZW1	9689	ENSG00000082153	chr2	0.698732	7.61034	12.2617	1.76824e-08	1.76072e-07	HomovsWT
TMLHE	55217	ENSG00000185973	chrX	-1.62619	0.681959	-8.14204	1.95101e-06	1.84788e-05	HeterovsWT		MED14	9282	ENSG00000180182	chrX	-0.895636	6.74339	-12.1761	1.92248e-08	1.8758e-07	HomovsWT
SRF	6722	ENSG00000112658	chr6	-0.464425	6.97625	-8.14225	1.95044e-06	1.84788e-05	HeterovsWT		CCDC138	165055	ENSG00000163006	chr2	-0.792684	6.1409	-12.0982	2.07529e-08	2.00617e-07	HomovsWT
TUT7	79670	ENSG00000083223	chr9	-0.589666	5.91108	-8.13986	1.9567e-06	1.85198e-05	HeterovsWT		AC005532.1	NA	NA	chr7	-2.01611	2.21918	-11.4626	3.93748e-08	3.39548e-07	HomovsWT
WASH5P	375690	ENSG00000282458	chr19	-1.46223	0.937965	-8.13841	1.96052e-06	1.85202e-05	HeterovsWT		ACPP	NA	NA	chr3	-1.20756	3.02731	-11.6202	3.34997e-08	2.97187e-07	HomovsWT
PMS2P1	5379	ENSG00000078319	chr7	-0.689134	5.09742	-8.13829	1.96084e-06	1.85202e-05	HeterovsWT		IL18R1	8809	ENSG00000115604	chr2	-0.719319	5.0172	-11.9823	2.3274e-08	2.2041e-07	HomovsWT
COLGALT1	79709	ENSG00000130309	chr19	-0.460793	8.79503	-8.13912	1.95865e-06	1.85202e-05	HeterovsWT		ZNF333	84449	ENSG00000160961	chr19	-0.772947	4.7461	-11.9058	2.51147e-08	2.35247e-07	HomovsWT
NKAIN1	79570	ENSG00000084628	chr1	3.84074	-1.76754	8.13725	1.96359e-06	1.85333e-05	HeterovsWT		TSN	7247	ENSG00000211460	chr2	-0.594495	7.39902	-12.2095	1.86069e-08	1.82864e-07	HomovsWT
HTT	3064	ENSG00000197386	chr4	0.385973	8.48763	8.13494	1.96967e-06	1.85778e-05	HeterovsWT		VBP1	7411	ENSG00000155959	chrX	-0.938812	6.6265	-12.1631	1.94708e-08	1.89707e-07	HomovsWT
WDR44	54521	ENSG00000131725	chrX	-0.874106	4.43326	-8.12799	1.98817e-06	1.87355e-05	HeterovsWT		CMTM8	152189	ENSG00000170293	chr3	1.25308	3.52888	11.6886	3.12498e-08	2.80526e-07	HomovsWT
CLSTN1	22883	ENSG00000171603	chr1	0.364846	8.44137	8.12762	1.98914e-06	1.87355e-05	HeterovsWT		LINC01264	104266963	ENSG00000229630	chr10	-2.22772	2.28909	-11.4079	4.16636e-08	3.56305e-07	HomovsWT
WDR61	80349	ENSG00000140395	chr15	-0.391288	6.275	-8.12561	1.99454e-06	1.87733e-05	HeterovsWT		RPL4	6124	ENSG00000174444	chr15	-0.578606	10.7971	-12.3305	1.65393e-08	1.67016e-07	HomovsWT
LINC01004	100216546	NA	chr7	0.687598	4.05722	8.1249	1.99644e-06	1.87781e-05	HeterovsWT		FNDC3B	64778	ENSG00000075420	chr3	-0.626655	8.90927	-12.2786	1.73932e-08	1.73446e-07	HomovsWT
RNFT2	84900	ENSG00000135119	chr12	0.989299	2.71291	8.12339	2.0005e-06	1.88033e-05	HeterovsWT		ADAMTS14	140766	ENSG00000138316	chr10	-1.24506	3.52502	-11.6248	3.33453e-08	2.96011e-07	HomovsWT
DIPK1B	138311	ENSG00000165716	chr9	1.29877	3.2329	8.1227	2.00236e-06	1.88051e-05	HeterovsWT		AL390879.1	NA	NA	chrX	-0.899963	3.72175	-11.73	2.99674e-08	2.71889e-07	HomovsWT
GLRX2	51022	ENSG00000023572	chr1	-0.664727	4.34686	-8.12229	2.00346e-06	1.88051e-05	HeterovsWT		PRKAR2A	5576	ENSG00000114302	chr3	0.592739	7.41067	12.1989	1.88001e-08	1.84273e-07	HomovsWT
EFNB2	1948	ENSG00000125266	chr13	2.72983	0.836733	8.12049	2.00831e-06	1.88376e-05	HeterovsWT		MFHAS1	9258	ENSG00000147324	chr8	0.630158	7.38123	12.1987	1.88045e-08	1.84273e-07	HomovsWT
CXCR4	7852	ENSG00000121966	chr2	-0.553909	7.35738	-8.11175	2.03207e-06	1.90473e-05	HeterovsWT		RASSF3	283349	ENSG00000153179	chr12	0.614786	5.99134	12.0609	2.15316e-08	2.05801e-07	HomovsWT
CBWD3	445571	ENSG00000196873	chr9	-0.576656	4.3988	-8.11105	2.034e-06	1.90522e-05	HeterovsWT		TCP11L1	55346	ENSG00000176148	chr11	0.742772	4.65354	11.8596	2.63023e-08	2.43848e-07	HomovsWT
IQCE	23288	ENSG00000106012	chr7	-0.513341	5.16668	-8.10966	2.03779e-06	1.90746e-05	HeterovsWT		LINC02202	101927740	ENSG00000245812	chr5	-3.93917	-0.406263	-11.7941	2.809e-08	2.57861e-07	HomovsWT
GFOD2	81577	ENSG00000141098	chr16	0.597363	5.04023	8.10426	2.05266e-06	1.91965e-05	HeterovsWT		CREB5	9586	ENSG00000146592	chr7	-1.76478	1.54309	-11.346	4.44244e-08	3.74649e-07	HomovsWT
CDC6	990	ENSG00000094804	chr17	0.424628	6.07986	8.10391	2.05364e-06	1.91965e-05	HeterovsWT		BCL11B	64919	ENSG00000127152	chr14	-5.91709	-1.47491	-12.1967	1.88406e-08	1.84494e-07	HomovsWT
RPA1	6117	ENSG00000132383	chr17	0.343854	7.92663	8.09815	2.06964e-06	1.93327e-05	HeterovsWT		PEAK1	79834	ENSG00000173517	chr15	-0.833191	6.95927	-12.138	1.99567e-08	1.93747e-07	HomovsWT
PDE7A	5150	ENSG00000205268	chr8	-0.399703	6.34545	-8.0911	2.0894e-06	1.95039e-05	HeterovsWT		HELLPAR	101101692	NA	chr12	-1.74477	2.91748	-11.5064	3.76393e-08	3.27284e-07	HomovsWT
LARP4B	23185	ENSG00000107929	chr10	0.330502	8.12899	8.08699	2.101e-06	1.95987e-05	HeterovsWT		EXT1	2131	ENSG00000182197	chr8	-5.68113	-0.90455	-12.0676	2.13889e-08	2.05013e-07	HomovsWT
MICALL2	79778	ENSG00000164877	chr7	0.662094	6.29189	8.08477	2.1073e-06	1.9644e-05	HeterovsWT		MAPK11	5600	ENSG00000185386	chr22	-2.21065	1.87536	-11.363	4.36489e-08	3.70293e-07	HomovsWT
NPIPB4	440345	ENSG00000185864	chr16	0.49426	5.58101	8.08396	2.10962e-06	1.96521e-05	HeterovsWT		EPOR	2057	ENSG00000187266	chr19	-1.69593	2.94735	-11.5176	3.72079e-08	3.24571e-07	HomovsWT
EMC7	56851	ENSG00000134153	chr15	-0.456957	5.90751	-8.08024	2.12022e-06	1.97374e-05	HeterovsWT		ITPK1	3705	ENSG00000274958	chr14	0.735634	6.48669	12.0804	2.11213e-08	2.02878e-07	HomovsWT
PARP14	54625	ENSG00000173193	chr3	-0.470219	5.69196	-8.06983	2.15022e-06	2.0003e-05	HeterovsWT		CBX2	84733	ENSG00000173894	chr17	0.768504	6.6656	12.0854	2.10154e-08	2.0229e-07	HomovsWT
ASRGL1	80150	ENSG00000162174	chr11	0.82474	3.58586	8.0668	2.15904e-06	2.00713e-05	HeterovsWT		SLC4A7	9497	ENSG00000033867	chr3	0.534379	7.38997	12.1425	1.98678e-08	1.93022e-07	HomovsWT
PDHA1	5160	ENSG00000131828	chrX	-0.467646	7.03239	-8.06491	2.16458e-06	2.01089e-05	HeterovsWT		TMEM51	55092	ENSG00000171729	chr1	-2.08502	1.78388	-11.2926	4.69678e-08	3.92658e-07	HomovsWT
FBXL19-AS1	283932	ENSG00000260852	chr16	0.740511	3.00668	8.06349	2.16873e-06	2.01134e-05	HeterovsWT		AVL9	23080	ENSG00000105778	chr7	0.528237	6.88407	12.0926	2.08685e-08	2.01304e-07	HomovsWT
CXorf40B	NA	NA	chrX	-0.795184	4.44601	-8.06374	2.16801e-06	2.01134e-05	HeterovsWT		NDUFAF2	91942	ENSG00000164182	chr5	-0.945919	4.88039	-11.8364	2.6922e-08	2.48407e-07	HomovsWT
SKA1	220134	ENSG00000154839	chr18	0.453221	6.24212	8.06304	2.17006e-06	2.01134e-05	HeterovsWT		ZNF530	348327	ENSG00000183647	chr19	1.72846	2.34601	11.3445	4.44955e-08	3.749e-07	HomovsWT
FECH	2235	ENSG00000066926	chr18	0.49786	6.702	8.06272	2.17098e-06	2.01134e-05	HeterovsWT		LINC02814	112267873	NA	chr1	-1.67907	2.28015	-11.41	4.15711e-08	3.55778e-07	HomovsWT
CACNA2D3	55799	ENSG00000157445	chr3	-6.07515	-1.54392	-8.06149	2.1746e-06	2.01332e-05	HeterovsWT		VENTX	27287	ENSG00000151650	chr10	1.02578	4.31004	11.7386	2.97081e-08	2.69716e-07	HomovsWT
CDCA2	157313	ENSG00000184661	chr8	0.423104	6.93773	8.0607	2.17693e-06	2.0141e-05	HeterovsWT		BCL11A	53335	ENSG00000119866	chr2	-0.536693	7.48634	-12.1097	2.05185e-08	1.98492e-07	HomovsWT
ROR2	4920	ENSG00000169071	chr9	-1.91203	-1.23155	-8.05367	2.19773e-06	2.03196e-05	HeterovsWT		RPS27L	51065	ENSG00000185088	chr15	-1.20856	4.65888	-11.7686	2.88212e-08	2.63148e-07	HomovsWT
CDCA5	113130	ENSG00000146670	chr11	0.717911	7.03047	8.05309	2.19943e-06	2.03216e-05	HeterovsWT		GDAP1L1	78997	ENSG00000124194	chr20	-1.11598	3.10131	-11.5402	3.63548e-08	3.1918e-07	HomovsWT
C3	718	ENSG00000125730	chr19	-1.35174	1.31558	-8.04985	2.2091e-06	2.03693e-05	HeterovsWT		BICD2	23299	ENSG00000185963	chr9	0.580055	6.03395	11.9793	2.33423e-08	2.20777e-07	HomovsWT
LINC01107	151171	ENSG00000225493	chr2	1.34213	0.545627	8.05005	2.20851e-06	2.03693e-05	HeterovsWT		AC245123.1	NA	NA	chr8	-6.77658	-0.733085	-11.9332	2.44384e-08	2.30342e-07	HomovsWT
STX10	8677	ENSG00000104915	chr19	-0.591413	5.93011	-8.05023	2.20796e-06	2.03693e-05	HeterovsWT		C1QTNF6	114904	ENSG00000133466	chr22	-1.18983	3.23726	-11.4941	3.81172e-08	3.30592e-07	HomovsWT
APC2	10297	ENSG00000115266	chr19	-0.527207	5.31782	-8.04826	2.21387e-06	2.03995e-05	HeterovsWT		GPR55	9290	ENSG00000135898	chr2	-4.9942	0.168865	-11.7267	3.00667e-08	2.72525e-07	HomovsWT
DMGDH	29958	ENSG00000132837	chr5	-1.47999	1.88797	-8.04414	2.22625e-06	2.04817e-05	HeterovsWT		UCP2	7351	ENSG00000175567	chr11	0.79243	6.54231	12.0026	2.28096e-08	2.16341e-07	HomovsWT
SNTA1	6640	ENSG00000101400	chr20	0.804249	3.81275	8.04474	2.22445e-06	2.04817e-05	HeterovsWT		MDH2	4191	ENSG00000146701	chr7	-0.78074	8.25516	-12.126	2.01938e-08	1.95629e-07	HomovsWT
HMGB3	3149	ENSG00000029993	chrX	0.447289	6.36917	8.04378	2.22732e-06	2.04817e-05	HeterovsWT		ZCCHC24	219654	ENSG00000165424	chr10	1.20325	3.50854	11.5725	3.51718e-08	3.09795e-07	HomovsWT
MIOS	54468	ENSG00000164654	chr7	-0.42566	6.19737	-8.03713	2.24748e-06	2.06531e-05	HeterovsWT		SLC9A7	84679	ENSG00000065923	chrX	-3.48905	-0.172057	-11.3366	4.48597e-08	3.77499e-07	HomovsWT
NTN1	9423	ENSG00000065320	chr17	0.678766	4.14908	8.03494	2.25415e-06	2.07004e-05	HeterovsWT		ARHGAP42	143872	ENSG00000165895	chr11	3.23715	1.35624	11.2182	5.07672e-08	4.17891e-07	HomovsWT
H2AFX	NA	NA	chr11	0.552211	7.56981	8.02785	2.27591e-06	2.08861e-05	HeterovsWT		CYTH1	9267	ENSG00000108669	chr17	0.726157	4.97854	11.804	2.78138e-08	2.55692e-07	HomovsWT
TOB2	10766	ENSG00000183864	chr22	0.573589	5.55913	8.02511	2.2844e-06	2.09439e-05	HeterovsWT		HMG20B	10362	ENSG00000064961	chr19	-0.720854	5.96975	-11.9191	2.47847e-08	2.32476e-07	HomovsWT
CAD	790	ENSG00000084774	chr2	0.462709	9.04898	8.02482	2.2853e-06	2.09439e-05	HeterovsWT		ZNF318	24149	ENSG00000171467	chr6	-0.541516	7.26373	-12.0453	2.18657e-08	2.087e-07	HomovsWT
MB21D2	151963	ENSG00000180611	chr3	-0.881535	3.41632	-8.02298	2.29099e-06	2.0982e-05	HeterovsWT		DYNC1H1	1778	ENSG00000197102	chr14	0.471628	8.98542	12.1274	2.01658e-08	1.95497e-07	HomovsWT
CD276	80381	ENSG00000103855	chr15	-0.681281	0.639555	-8.01707	2.30945e-06	2.11368e-05	HeterovsWT		PLEKHG2	64857	ENSG00000090924	chr19	0.716085	5.24499	11.8193	2.73885e-08	2.52368e-07	HomovsWT
CGNL1	84952	ENSG00000128849	chr15	-0.699323	3.63439	-8.01655	2.31107e-06	2.11373e-05	HeterovsWT		AC144652.1	NA	NA	chr7	1.54778	2.44776	11.3326	4.50503e-08	3.784e-07	HomovsWT
ATAD5	79915	ENSG00000176208	chr17	0.449684	5.39797	8.01587	2.3132e-06	2.11426e-05	HeterovsWT		AC046134.2	NA	NA	chr3	-1.05282	3.19241	-11.4491	3.99263e-08	3.4365e-07	HomovsWT
NDUFAF5	79133	ENSG00000101247	chr20	-0.5935	4.2789	-8.01328	2.32136e-06	2.12029e-05	HeterovsWT		FOXN4	121643	ENSG00000139445	chr12	-2.18518	2.28453	-11.2148	5.09491e-08	4.19134e-07	HomovsWT
UNC50	25972	ENSG00000115446	chr2	0.580221	5.43475	8.01213	2.32499e-06	2.12218e-05	HeterovsWT		AC021851.2	NA	NA	chr2	-2.09818	2.64146	-11.2555	4.8825e-08	4.05591e-07	HomovsWT
THBD	7056	ENSG00000178726	chr20	-0.70181	3.68865	-8.01078	2.32925e-06	2.12464e-05	HeterovsWT		CD46	4179	ENSG00000117335	chr1	-0.526853	7.86953	-12.0487	2.17927e-08	2.08149e-07	HomovsWT
AC009404.1	NA	NA	chr2	-0.88989	2.3302	-8.00181	2.35778e-06	2.14922e-05	HeterovsWT		WASHC3	51019	ENSG00000120860	chr12	-1.50313	3.22211	-11.4261	4.08853e-08	3.50793e-07	HomovsWT
RIOX2	84864	ENSG00000170854	chr3	-0.461518	5.78029	-7.99993	2.36384e-06	2.1533e-05	HeterovsWT		FASTKD1	79675	ENSG00000138399	chr2	-0.589358	6.39186	-11.922	2.47141e-08	2.3213e-07	HomovsWT
GRIK3	2899	ENSG00000163873	chr1	-0.646714	5.41706	-7.99337	2.385e-06	2.17112e-05	HeterovsWT		CANX	821	ENSG00000283777	chr5	0.526874	10.5256	12.1336	2.00425e-08	1.94441e-07	HomovsWT
BMI1	648	ENSG00000168283	chr10	-0.677615	8.32742	-7.98381	2.41621e-06	2.19805e-05	HeterovsWT		GRIN3A	116443	ENSG00000198785	chr9	-2.75115	1.18154	-11.1562	5.41914e-08	4.40208e-07	HomovsWT
AC005532.1	NA	NA	chr7	-1.1812	2.21918	-7.98276	2.41966e-06	2.19945e-05	HeterovsWT		IDH3G	3421	ENSG00000067829	chrX	-0.733433	5.6277	-11.842	2.6771e-08	2.47444e-07	HomovsWT
STARD7-AS1	285033	NA	chr2	0.641432	4.08625	7.98236	2.42098e-06	2.19945e-05	HeterovsWT		KYNU	8942	ENSG00000115919	chr2	-4.26386	1.58385	-11.2032	5.15771e-08	4.23531e-07	HomovsWT
CENPI	2491	ENSG00000102384	chrX	-0.478159	5.81601	-7.97607	2.44182e-06	2.2169e-05	HeterovsWT		MOV10	4343	ENSG00000155363	chr1	0.643374	6.27061	11.9038	2.51666e-08	2.3557e-07	HomovsWT
VKORC1L1	154807	ENSG00000196715	chr7	-0.359195	7.84736	-7.97502	2.44529e-06	2.21857e-05	HeterovsWT		AC124016.2	NA	NA	chr4	2.06803	1.46721	11.1578	5.41002e-08	4.3973e-07	HomovsWT
NUP160	23279	ENSG00000030066	chr11	0.318426	7.7856	7.97439	2.44741e-06	2.21901e-05	HeterovsWT		RUNX2	860	ENSG00000124813	chr6	-0.873794	5.84803	-11.871	2.60055e-08	2.41911e-07	HomovsWT
GIGYF1	64599	ENSG00000146830	chr7	-0.614922	8.47622	-7.97277	2.45281e-06	2.22242e-05	HeterovsWT		CRTAP	10491	ENSG00000170275	chr3	-0.557484	8.4401	-12.0424	2.19288e-08	2.09155e-07	HomovsWT
STIL	6491	ENSG00000123473	chr1	0.474353	6.98612	7.96083	2.49304e-06	2.25736e-05	HeterovsWT		PNPLA1	285848	ENSG00000180316	chr6	-1.10581	3.20962	-11.4108	4.15385e-08	3.55723e-07	HomovsWT
NUCB2	4925	ENSG00000070081	chr11	0.43778	8.61114	7.95978	2.49663e-06	2.25911e-05	HeterovsWT		GORASP2	26003	ENSG00000115806	chr2	-0.700789	6.44055	-11.8972	2.53328e-08	2.36799e-07	HomovsWT
SNAI3-AS1	197187	ENSG00000260630	chr16	0.78459	3.59828	7.95633	2.50841e-06	2.26675e-05	HeterovsWT		AC108047.1	NA	NA	chr2	-1.38496	3.13199	-11.3549	4.40138e-08	3.71764e-07	HomovsWT
YES1	7525	ENSG00000176105	chr18	-1.11721	1.25728	-7.95665	2.50729e-06	2.26675e-05	HeterovsWT		HEBP2	23593	ENSG00000051620	chr6	-0.665588	6.10028	-11.8527	2.6486e-08	2.45216e-07	HomovsWT
PFKFB3	5209	ENSG00000170525	chr10	0.523088	6.83389	7.95539	2.51161e-06	2.26813e-05	HeterovsWT		CNOT6	57472	ENSG00000113300	chr5	0.672268	7.61681	12.0057	2.27387e-08	2.15819e-07	HomovsWT
FIS1	51024	ENSG00000214253	chr7	-0.711609	6.20208	-7.95164	2.52451e-06	2.27826e-05	HeterovsWT		CD19	930	ENSG00000177455	chr16	-2.23621	0.93449	-11.1133	5.66997e-08	4.55678e-07	HomovsWT
C9orf40	55071	ENSG00000135045	chr9	-0.507744	5.52705	-7.94766	2.53823e-06	2.28913e-05	HeterovsWT		PTPRJ	5795	ENSG00000149177	chr11	0.708128	6.91357	11.93	2.45158e-08	2.30911e-07	HomovsWT
LRRC28	123355	ENSG00000168904	chr15	-0.562106	4.39061	-7.94303	2.55435e-06	2.30214e-05	HeterovsWT		NSDHL	50814	ENSG00000147383	chrX	-0.925698	4.82878	-11.6637	3.20516e-08	2.8621e-07	HomovsWT
KATNAL2	83473	ENSG00000167216	chr18	0.734059	4.63858	7.93306	2.58938e-06	2.33199e-05	HeterovsWT		RNPS1	10921	ENSG00000205937	chr16	0.544413	7.63969	11.9678	2.36101e-08	2.23154e-07	HomovsWT
AGBL5	60509	ENSG00000084693	chr2	0.515997	6.23582	7.93263	2.59091e-06	2.33199e-05	HeterovsWT		SPAG1	6674	ENSG00000104450	chr8	-0.995728	3.88664	-11.4991	3.7923e-08	3.29539e-07	HomovsWT
ENOSF1	55556	ENSG00000132199	chr18	0.341186	6.92318	7.93205	2.59297e-06	2.3323e-05	HeterovsWT		CTDSP1	58190	ENSG00000144579	chr2	0.657012	6.49692	11.8681	2.608e-08	2.42284e-07	HomovsWT
ATP2C2	9914	ENSG00000064270	chr16	1.13266	0.33129	7.92559	2.61594e-06	2.35082e-05	HeterovsWT		INPP5B	3633	ENSG00000204084	chr1	0.585583	7.09307	11.9121	2.49589e-08	2.33949e-07	HomovsWT
TREX2	11219	ENSG00000183479	chrX	-1.49641	2.02218	-7.92499	2.61809e-06	2.35082e-05	HeterovsWT		GFOD2	81577	ENSG00000141098	chr16	0.842394	5.04023	11.6551	3.23327e-08	2.88152e-07	HomovsWT
RTN4R	65078	ENSG00000040608	chr22	0.746094	5.02901	7.92481	2.61875e-06	2.35082e-05	HeterovsWT		ATRX	546	ENSG00000085224	chrX	-0.668454	7.10611	-11.9213	2.47307e-08	2.3213e-07	HomovsWT
MED15	51586	ENSG00000099917	chr22	0.403365	6.85096	7.92395	2.62184e-06	2.35204e-05	HeterovsWT		NCALD	83988	ENSG00000104490	chr8	1.15975	2.81704	11.3591	4.3826e-08	3.70904e-07	HomovsWT
PHACTR4	65979	ENSG00000204138	chr1	0.434192	6.30526	7.92029	2.635e-06	2.36228e-05	HeterovsWT		MADD	8567	ENSG00000110514	chr11	0.595151	7.0078	11.8995	2.52742e-08	2.36415e-07	HomovsWT
PEAK1	79834	ENSG00000173517	chr15	-0.533016	6.95927	-7.90695	2.68355e-06	2.40422e-05	HeterovsWT		RNF4	6047	ENSG00000063978	chr4	0.571401	7.40843	11.9271	2.45885e-08	2.31305e-07	HomovsWT
MTX3	345778	ENSG00000177034	chr5	-0.562614	4.03358	-7.90617	2.68643e-06	2.40521e-05	HeterovsWT		ASAP3	55616	ENSG00000088280	chr1	-3.24755	0.365262	-11.1744	5.31604e-08	4.3417e-07	HomovsWT
BX640514.2	NA	NA	chr20	0.646308	4.17644	7.90325	2.69722e-06	2.41328e-05	HeterovsWT		DDIT4	54541	ENSG00000168209	chr10	-1.61885	3.66426	-11.3527	4.41145e-08	3.72382e-07	HomovsWT
SRC	6714	ENSG00000197122	chr20	-0.862297	2.47143	-7.89514	2.72736e-06	2.43864e-05	HeterovsWT		ICAM3	3385	ENSG00000076662	chr19	1.58577	2.55082	11.1885	5.23803e-08	4.28056e-07	HomovsWT
ABCD4	5826	ENSG00000119688	chr14	0.672117	4.37285	7.89336	2.73402e-06	2.44094e-05	HeterovsWT		RBM45	129831	ENSG00000155636	chr2	-0.787708	4.49029	-11.5391	3.63969e-08	3.19343e-07	HomovsWT
SIGLEC7	27036	ENSG00000168995	chr19	-0.535628	4.86342	-7.89286	2.73589e-06	2.44094e-05	HeterovsWT		ADNP2	22850	ENSG00000101544	chr18	0.621022	6.69617	11.84	2.68246e-08	2.47676e-07	HomovsWT
CCHCR1	54535	ENSG00000224180	chr6	0.687123	5.3035	7.89253	2.73712e-06	2.44094e-05	HeterovsWT		LINC01731	105371226	NA	chr1	-3.67402	-1.11661	-11.536	3.65117e-08	3.19937e-07	HomovsWT
GTF3C5	9328	ENSG00000148308	chr9	0.533674	6.19925	7.89375	2.73256e-06	2.44094e-05	HeterovsWT		SMG9	56006	ENSG00000105771	chr19	0.611804	6.28714	11.8039	2.78165e-08	2.55692e-07	HomovsWT
NAALADL2	254827	ENSG00000177694	chr3	2.72379	0.608726	7.89081	2.74359e-06	2.44511e-05	HeterovsWT		TTC28	23331	ENSG00000100154	chr22	-3.95657	1.25161	-11.0636	5.97653e-08	4.76352e-07	HomovsWT
LAMP5	24141	ENSG00000125869	chr20	-0.391932	6.55506	-7.89022	2.74583e-06	2.4455e-05	HeterovsWT		KDM7A	80853	ENSG00000006459	chr7	0.688353	5.48733	11.7243	3.01418e-08	2.72924e-07	HomovsWT
CDC42EP4	23580	ENSG00000179604	chr17	0.556039	4.94546	7.88439	2.76788e-06	2.46352e-05	HeterovsWT		ZHX2	22882	ENSG00000178764	chr8	-0.911002	5.33995	-11.6343	3.3024e-08	2.93734e-07	HomovsWT
SUPT3H	8464	ENSG00000196284	chr6	-0.551228	5.71732	-7.88384	2.76996e-06	2.46376e-05	HeterovsWT		LINC01127	100506328	NA	chr2	-5.1213	-0.138934	-11.7158	3.04008e-08	2.74664e-07	HomovsWT
BCL9	607	ENSG00000116128	chr1	0.768279	4.20278	7.88292	2.77348e-06	2.46527e-05	HeterovsWT		KMT2E	55904	ENSG00000005483	chr7	0.764317	6.90624	11.8416	2.67812e-08	2.47444e-07	HomovsWT
ERC1	23085	ENSG00000082805	chr12	0.433887	6.77014	7.88144	2.7791e-06	2.46866e-05	HeterovsWT		CARD8	22900	ENSG00000105483	chr19	0.53333	7.109	11.8712	2.59999e-08	2.41911e-07	HomovsWT
UBE3B	89910	ENSG00000151148	chr12	0.454518	6.25461	7.8807	2.78195e-06	2.46957e-05	HeterovsWT		SLC26A6	65010	ENSG00000225697	chr3	0.830277	6.43317	11.7836	2.8389e-08	2.60351e-07	HomovsWT
LINC02641	105378531	ENSG00000286344	chr10	-2.1112	-0.418125	-7.8797	2.78577e-06	2.47135e-05	HeterovsWT		CDC73	79577	ENSG00000134371	chr1	-0.763477	6.39704	-11.7753	2.86276e-08	2.61992e-07	HomovsWT
NAA35	60560	ENSG00000135040	chr9	-0.538723	6.15708	-7.87904	2.78828e-06	2.47196e-05	HeterovsWT		SYNRG	11276	ENSG00000275066	chr17	0.65728	5.77583	11.7039	3.07707e-08	2.77324e-07	HomovsWT
CDCA8	55143	ENSG00000134690	chr1	0.406233	7.09219	7.87709	2.79577e-06	2.47698e-05	HeterovsWT		ELL2	22936	ENSG00000118985	chr5	-1.02487	3.2837	-11.3196	4.56606e-08	3.83248e-07	HomovsWT
DPYS	1807	ENSG00000147647	chr8	-2.75384	-0.565424	-7.87269	2.81272e-06	2.4857e-05	HeterovsWT		IGBP1	3476	ENSG00000089289	chrX	-0.654084	5.628	-11.7094	3.05976e-08	2.76131e-07	HomovsWT
CYP3A4	1576	ENSG00000160868	chr7	-2.07691	-0.758141	-7.87346	2.80972e-06	2.4857e-05	HeterovsWT		AACS	65985	ENSG00000081760	chr12	0.637542	5.71503	11.7048	3.07413e-08	2.77243e-07	HomovsWT
BCL3	602	ENSG00000069399	chr19	-1.25133	2.35739	-7.8732	2.81075e-06	2.4857e-05	HeterovsWT		CXorf40A	NA	NA	chrX	-0.976958	3.74043	-11.3995	4.20244e-08	3.58978e-07	HomovsWT
VPS35L	57020	ENSG00000103544	chr16	0.381713	6.66847	7.87263	2.81293e-06	2.4857e-05	HeterovsWT		ZMYM3	9203	ENSG00000147130	chrX	-0.577193	7.08511	-11.8356	2.69435e-08	2.48437e-07	HomovsWT
GPR137C	283554	ENSG00000180998	chr14	0.997034	2.7836	7.87046	2.82132e-06	2.4903e-05	HeterovsWT		SLC7A11	23657	ENSG00000151012	chr4	-0.850402	5.4094	-11.6543	3.23568e-08	2.88177e-07	HomovsWT
ATP13A1	57130	ENSG00000105726	chr19	-0.425581	7.00967	-7.87034	2.8218e-06	2.4903e-05	HeterovsWT		TTC27	55622	ENSG00000018699	chr2	-0.671983	6.06001	-11.719	3.03018e-08	2.74032e-07	HomovsWT
PCBP3	54039	ENSG00000183570	chr21	-0.435437	6.20821	-7.86951	2.82502e-06	2.49152e-05	HeterovsWT		NR3C2	4306	ENSG00000151623	chr4	-4.8128	-0.487324	-11.4193	4.1176e-08	3.53063e-07	HomovsWT
GPANK1	7918	ENSG00000232312	chr6	0.735407	4.56208	7.86379	2.84734e-06	2.50958e-05	HeterovsWT		DPH6	89978	ENSG00000134146	chr15	-0.933	5.12294	-11.5729	3.51596e-08	3.09795e-07	HomovsWT
ACER3	55331	ENSG00000078124	chr11	-0.635975	5.7539	-7.85984	2.86282e-06	2.52158e-05	HeterovsWT		PRMT2	3275	ENSG00000160310	chr21	0.619214	6.49749	11.7676	2.88526e-08	2.6318e-07	HomovsWT
SDK2	54549	ENSG00000069188	chr17	4.8578	-2.46368	7.85931	2.86492e-06	2.5218e-05	HeterovsWT		UPP2	151531	ENSG00000007001	chr2	-3.53362	0.237099	-11.0631	5.97983e-08	4.76352e-07	HomovsWT
RORB-AS1	103752585	NA	chr9	-1.02737	2.48916	-7.85838	2.8686e-06	2.5234e-05	HeterovsWT		UTP25	27042	ENSG00000117597	chr1	-0.889673	5.15665	-11.5602	3.56172e-08	3.13109e-07	HomovsWT
ICA1L	130026	ENSG00000163596	chr2	-1.23487	2.25405	-7.84953	2.90375e-06	2.55267e-05	HeterovsWT		ABCF2	10061	ENSG00000033050	chr7;chr7	0.53739	6.64292	11.7741	2.86644e-08	2.61992e-07	HomovsWT
DIS3L	115752	ENSG00000166938	chr15	-0.424215	5.58829	-7.84887	2.90639e-06	2.55334e-05	HeterovsWT		HNRNPUL1	11100	ENSG00000105323	chr19	0.642609	8.34096	11.8703	2.60221e-08	2.41911e-07	HomovsWT
MSRB1	51734	ENSG00000198736	chr16	0.749213	4.83839	7.84728	2.91276e-06	2.55728e-05	HeterovsWT		TESPA1	9840	ENSG00000135426	chr12	-2.13415	1.46721	-10.9963	6.42027e-08	5.05508e-07	HomovsWT
RCOR2	283248	ENSG00000167771	chr11	2.18947	0.0606151	7.84552	2.91984e-06	2.56184e-05	HeterovsWT		GPATCH2	55105	ENSG00000092978	chr1	-0.834329	5.35344	-11.5887	3.45961e-08	3.05517e-07	HomovsWT
AC010601.1	NA	NA	chr16	-3.44216	-2.52376	-7.84227	2.93294e-06	2.57167e-05	HeterovsWT		LINC00514	NA	NA	chr16	2.27575	1.58202	10.9797	6.53518e-08	5.13365e-07	HomovsWT
AL138756.1	NA	NA	chr9	1.70816	1.83793	7.83998	2.9422e-06	2.57813e-05	HeterovsWT		TRAF5	7188	ENSG00000082512	chr1	-1.26436	3.81356	-11.2815	4.75122e-08	3.96383e-07	HomovsWT
CXorf38	159013	ENSG00000185753	chrX	-0.423275	5.7869	-7.83752	2.95217e-06	2.5852e-05	HeterovsWT		MED29	55588	ENSG00000063322	chr19	0.752089	5.35868	11.594	3.44081e-08	3.04252e-07	HomovsWT
SGIP1	84251	ENSG00000118473	chr1	-1.82514	-0.183397	-7.83585	2.95897e-06	2.58948e-05	HeterovsWT		PITPNM1	9600	ENSG00000110697	chr11	0.657314	6.98413	11.7766	2.85907e-08	2.61847e-07	HomovsWT
IL4R	3566	ENSG00000077238	chr16	-0.442678	6.35758	-7.83479	2.96329e-06	2.59159e-05	HeterovsWT		TAF6	6878	ENSG00000106290	chr7	-0.691386	5.8577	-11.6567	3.22783e-08	2.87855e-07	HomovsWT
LINC01937	105373962	NA	chr2	2.46607	-1.73283	7.83102	2.97876e-06	2.60345e-05	HeterovsWT		TMCO4	255104	ENSG00000162542	chr1	-0.583547	6.66548	-11.7264	3.00777e-08	2.72525e-07	HomovsWT
UTP20	27340	ENSG00000120800	chr12	0.429499	6.534	7.83011	2.98248e-06	2.60353e-05	HeterovsWT		AL118508.3	NA	NA	chr20	-3.07867	-0.255267	-10.9889	6.47132e-08	5.09232e-07	HomovsWT
PLK1	5347	ENSG00000166851	chr16	0.35655	7.25936	7.83006	2.98269e-06	2.60353e-05	HeterovsWT		SSR4	6748	ENSG00000180879	chrX	-1.03491	6.78689	-11.7543	2.92399e-08	2.66356e-07	HomovsWT
FAHD2B	151313	ENSG00000144199	chr2	0.640659	4.78442	7.82887	2.9876e-06	2.60614e-05	HeterovsWT		DCAF1	9730	ENSG00000145041	chr3	0.520996	7.15655	11.7745	2.8652e-08	2.61992e-07	HomovsWT
TIMM44	10469	ENSG00000104980	chr19	-0.600697	6.59819	-7.82022	3.02348e-06	2.63477e-05	HeterovsWT		SFPQ	6421	ENSG00000116560	chr1	0.517631	8.91812	11.8588	2.63235e-08	2.43879e-07	HomovsWT
BRI3BP	140707	ENSG00000184992	chr12	0.454449	7.20325	7.81956	3.02624e-06	2.63477e-05	HeterovsWT		GTF2H5	404672	ENSG00000272047	chr6	-1.38207	3.47458	-11.2215	5.05916e-08	4.17001e-07	HomovsWT
MACF1	23499	ENSG00000127603	chr1	0.30259	9.06484	7.81996	3.02453e-06	2.63477e-05	HeterovsWT		OTUD4	54726	ENSG00000164164	chr4	0.518845	6.93336	11.7416	2.96177e-08	2.69075e-07	HomovsWT
NBPF9	400818	ENSG00000269713	chr1	-0.55058	4.30936	-7.81426	3.04846e-06	2.65241e-05	HeterovsWT		ZC3H18	124245	ENSG00000158545	chr16	0.634643	6.36906	11.6873	3.12927e-08	2.80725e-07	HomovsWT
KMT5A	387893	ENSG00000183955	chr12	0.482854	6.10523	7.81149	3.06014e-06	2.65992e-05	HeterovsWT		PCCB	5096	ENSG00000114054	chr3	-0.553437	6.68715	-11.7007	3.08697e-08	2.78032e-07	HomovsWT
STAT5A	6776	ENSG00000126561	chr17	0.448621	6.80361	7.81128	3.061e-06	2.65992e-05	HeterovsWT		ST7L	54879	ENSG00000007341	chr1	0.785578	5.63325	11.5905	3.45332e-08	3.05159e-07	HomovsWT
PLEKHF2	79666	ENSG00000175895	chr8	-0.601378	6.35462	-7.8103	3.06519e-06	2.66015e-05	HeterovsWT		TMEM104	54868	ENSG00000109066	chr17	0.595585	6.44446	11.6981	3.09499e-08	2.78569e-07	HomovsWT
GNL3L	54552	ENSG00000130119	chrX	-0.329303	7.90148	-7.81057	3.06401e-06	2.66015e-05	HeterovsWT		LINC-ROR	100885779	ENSG00000258609	chr18	1.05737	4.69108	11.4712	3.90257e-08	3.37395e-07	HomovsWT
JAZF1	221895	ENSG00000153814	chr7	-0.494098	6.21002	-7.80773	3.07606e-06	2.66788e-05	HeterovsWT		SHMT1	6470	ENSG00000284320	chr17	0.613403	6.51279	11.6786	3.15678e-08	2.82633e-07	HomovsWT
THEM4	117145	ENSG00000159445	chr1	-0.679989	4.31292	-7.80476	3.08871e-06	2.67715e-05	HeterovsWT		PLIN3	10226	ENSG00000105355	chr19	-1.02774	6.51619	-11.6609	3.21434e-08	2.8684e-07	HomovsWT
FGL1	2267	ENSG00000104760	chr8	-1.94552	0.180312	-7.80293	3.09656e-06	2.68183e-05	HeterovsWT		CHPF2	54480	ENSG00000033100	chr7	0.779499	6.462	11.6695	3.18623e-08	2.84707e-07	HomovsWT
MEN1	4221	ENSG00000133895	chr11	0.476535	5.42237	7.80257	3.09807e-06	2.68183e-05	HeterovsWT		ESRRB	2103	ENSG00000119715	chr14	-2.09389	1.55865	-10.9004	7.11441e-08	5.51844e-07	HomovsWT
FGD1	2245	ENSG00000102302	chrX	1.97195	0.0514142	7.80059	3.10658e-06	2.68748e-05	HeterovsWT		KIF22	3835	ENSG00000079616	chr16	0.531123	7.59598	11.7463	2.94778e-08	2.68163e-07	HomovsWT
NOS1AP	9722	ENSG00000198929	chr1	-0.71355	2.87279	-7.79485	3.13132e-06	2.70509e-05	HeterovsWT		RNF14	9604	ENSG00000013561	chr5	-0.878117	4.37219	-11.3747	4.31212e-08	3.66962e-07	HomovsWT
AP3M2	10947	ENSG00000070718	chr8	-0.591393	4.54033	-7.79449	3.13291e-06	2.70509e-05	HeterovsWT		FGF13	2258	ENSG00000129682	chrX	-0.961815	5.33063	-11.467	3.91969e-08	3.38444e-07	HomovsWT
LONP1	9361	ENSG00000196365	chr19	-0.673539	8.51043	-7.7947	3.13198e-06	2.70509e-05	HeterovsWT		AC011997.1	NA	NA	chr2	-1.08864	3.78303	-11.265	4.834e-08	4.02027e-07	HomovsWT
MND1	84057	ENSG00000121211	chr4	0.568347	5.73197	7.78886	3.15742e-06	2.72452e-05	HeterovsWT		ELK1	2002	ENSG00000126767	chrX	-0.697785	5.9612	-11.583	3.4798e-08	3.06994e-07	HomovsWT
PHLDA1	22822	ENSG00000139289	chr12	-1.30796	1.4881	-7.78737	3.16391e-06	2.72667e-05	HeterovsWT		ENG	2022	ENSG00000106991	chr9	0.718516	6.62829	11.6758	3.16593e-08	2.83265e-07	HomovsWT
NSUN5P1	155400	ENSG00000223705	chr7	-0.616209	5.70929	-7.78766	3.16266e-06	2.72667e-05	HeterovsWT		PMPCB	9512	ENSG00000105819	chr7	0.706114	6.073	11.5827	3.48086e-08	3.06994e-07	HomovsWT
P2RX4	5025	ENSG00000135124	chr12	-0.510514	4.80579	-7.78632	3.1685e-06	2.72889e-05	HeterovsWT		GLI1	2735	ENSG00000111087	chr12	1.55939	2.28249	11.0025	6.37839e-08	5.02793e-07	HomovsWT
DNAJC5B	85479	ENSG00000147570	chr8	-0.932387	1.88293	-7.78114	3.19131e-06	2.7468e-05	HeterovsWT		STK39	27347	ENSG00000198648	chr2	-0.83075	7.2514	-11.6972	3.0978e-08	2.78638e-07	HomovsWT
AGT	183	ENSG00000135744	chr1	-2.37593	-0.647664	-7.77987	3.19693e-06	2.74989e-05	HeterovsWT		CBFB	865	ENSG00000067955	chr16	0.594015	7.44369	11.719	3.03045e-08	2.74032e-07	HomovsWT
ABCB7	22	ENSG00000131269	chrX	-0.450423	6.52926	-7.77484	3.21931e-06	2.76738e-05	HeterovsWT		CYB561	1534	ENSG00000008283	chr17	2.89639	0.489297	10.8828	7.25037e-08	5.61109e-07	HomovsWT
BOD1L1	259282	ENSG00000038219	chr4	0.521453	5.91077	7.76779	3.25091e-06	2.79278e-05	HeterovsWT		SF3B3	23450	ENSG00000189091	chr16	0.537538	8.71315	11.7533	2.92693e-08	2.66445e-07	HomovsWT
AC008267.3	NA	NA	chr7	-0.940762	2.77327	-7.7617	3.27848e-06	2.81468e-05	HeterovsWT		CYTL1	54360	ENSG00000170891	chr4	-2.13324	1.28564	-10.863	7.40673e-08	5.69183e-07	HomovsWT
KIAA1143	57456	ENSG00000281665	chr3	0.474533	7.02791	7.76082	3.28248e-06	2.81634e-05	HeterovsWT		PYGB	5834	ENSG00000100994	chr20	-0.70459	6.65347	-11.6293	3.31907e-08	2.94991e-07	HomovsWT
PTPN4	5775	ENSG00000088179	chr2	-0.484573	5.96202	-7.76006	3.28597e-06	2.817e-05	HeterovsWT		ARRB2	409	ENSG00000141480	chr17	0.711475	7.37034	11.6914	3.11634e-08	2.79935e-07	HomovsWT
SMARCC1	6599	ENSG00000173473	chr3	0.361558	8.99036	7.75974	3.28739e-06	2.817e-05	HeterovsWT		NCAPD2	9918	ENSG00000010292	chr12	0.539906	8.66978	11.7423	2.9597e-08	2.69068e-07	HomovsWT
RASA3	22821	ENSG00000280477	chr13	0.364629	8.60181	7.75524	3.30803e-06	2.83289e-05	HeterovsWT		LINC02595	401585	NA	chrX	-6.44593	-1.96798	-11.5272	3.68419e-08	3.21999e-07	HomovsWT
CABIN1	23523	ENSG00000099991	chr22	0.414942	7.91528	7.7527	3.31971e-06	2.8411e-05	HeterovsWT		SEC23B	10483	ENSG00000101310	chr20	-0.703774	6.47352	-11.5941	3.44056e-08	3.04252e-07	HomovsWT
PHF13	148479	ENSG00000116273	chr1	0.562834	5.88961	7.74663	3.34778e-06	2.86332e-05	HeterovsWT		ACBD3	64746	ENSG00000182827	chr1	-0.664796	5.63108	-11.4848	3.84846e-08	3.33187e-07	HomovsWT
XRN2	22803	ENSG00000088930	chr20	-0.379254	7.45451	-7.74466	3.35698e-06	2.86939e-05	HeterovsWT		CPNE4	131034	ENSG00000196353	chr3	-3.39758	0.293198	-10.8699	7.35198e-08	5.67388e-07	HomovsWT
AC105402.3	NA	NA	chr2	-1.54143	0.0375541	-7.74379	3.36101e-06	2.87029e-05	HeterovsWT		FLOT2	2319	ENSG00000132589	chr17	0.654019	7.08786	11.6533	3.23913e-08	2.88295e-07	HomovsWT
PLCB1	23236	ENSG00000182621	chr20	-0.532967	7.91649	-7.74353	3.36226e-06	2.87029e-05	HeterovsWT		C1orf226	400793	ENSG00000239887	chr1	-2.12399	1.23662	-10.8135	7.8134e-08	5.95854e-07	HomovsWT
NLRP1	22861	ENSG00000091592	chr17	-0.861388	3.07873	-7.74242	3.36744e-06	2.8729e-05	HeterovsWT		PARP12	64761	ENSG00000059378	chr7	0.660563	5.2907	11.4545	3.97051e-08	3.42179e-07	HomovsWT
SLC22A4	6583	ENSG00000197208	chr5	-0.893508	2.50539	-7.74009	3.37834e-06	2.88039e-05	HeterovsWT		ZNF786	136051	ENSG00000197362	chr7	1.18126	3.29537	11.1211	5.62326e-08	4.53534e-07	HomovsWT
CEP131	22994	ENSG00000141577	chr17	0.778013	5.03938	7.73898	3.38355e-06	2.88302e-05	HeterovsWT		C7orf50	84310	ENSG00000146540	chr7	1.13778	6.94326	11.6178	3.35826e-08	2.97728e-07	HomovsWT
JRK	8629	ENSG00000234616	chr8	0.618123	6.89519	7.73789	3.38871e-06	2.88561e-05	HeterovsWT		CA5B	11238	ENSG00000169239	chrX	-1.0774	4.89346	-11.3718	4.32488e-08	3.67793e-07	HomovsWT
CD22	933	ENSG00000012124	chr19	-1.74957	1.6267	-7.73173	3.41783e-06	2.90858e-05	HeterovsWT		B4GALT5	9334	ENSG00000158470	chr20	0.532827	7.93176	11.684	3.13958e-08	2.81464e-07	HomovsWT
C16orf74	404550	ENSG00000154102	chr16	0.405549	6.33239	7.73089	3.42186e-06	2.91019e-05	HeterovsWT		SAMD9	54809	ENSG00000205413	chr7	-0.906628	5.50136	-11.4699	3.90806e-08	3.37654e-07	HomovsWT
PECR	55825	ENSG00000115425	chr2	-0.819292	2.66759	-7.72788	3.43619e-06	2.92055e-05	HeterovsWT		CTSG	1511	ENSG00000100448	chr14	-0.865347	9.02926	-11.6948	3.10538e-08	2.79135e-07	HomovsWT
LRRCC1	85444	ENSG00000133739	chr8	0.721506	5.08404	7.72536	3.44828e-06	2.92716e-05	HeterovsWT		CCDC18-AS1	100131564	NA	chr1	-0.793233	4.25575	-11.2415	4.95444e-08	4.10062e-07	HomovsWT
TMEM38B	55151	ENSG00000095209	chr9	0.500206	6.26501	7.7254	3.44807e-06	2.92716e-05	HeterovsWT		ZC3H12D	340152	ENSG00000178199	chr6	-0.802987	5.1251	-11.3579	4.38772e-08	3.70904e-07	HomovsWT
IQCC	55721	ENSG00000160051	chr1	1.17042	1.62096	7.72423	3.45371e-06	2.92811e-05	HeterovsWT		POLQ	10721	ENSG00000051341	chr3	0.509579	6.98565	11.6081	3.39168e-08	3.00299e-07	HomovsWT
TSEN15	116461	ENSG00000198860	chr1	-0.442913	6.52152	-7.72437	3.45304e-06	2.92811e-05	HeterovsWT		CCNB2	9133	ENSG00000157456	chr15	-0.585189	6.36182	-11.5377	3.64472e-08	3.19577e-07	HomovsWT
QRICH1	54870	ENSG00000198218	chr3	0.364547	6.86708	7.71925	3.47772e-06	2.94662e-05	HeterovsWT		MCM6	4175	ENSG00000076003	chr2	-0.481191	9.31484	-11.7154	3.04149e-08	2.74664e-07	HomovsWT
ID2	3398	ENSG00000115738	chr2	-0.555285	5.67956	-7.71738	3.48682e-06	2.95249e-05	HeterovsWT		CCDC9B	388115	ENSG00000188549	chr15	-0.976187	3.85106	-11.2018	5.16532e-08	4.23695e-07	HomovsWT
TYW1	55253	ENSG00000198874	chr7	-0.388765	6.71104	-7.71648	3.49117e-06	2.95434e-05	HeterovsWT		ERO1B	56605	ENSG00000086619	chr1	-1.36704	3.45674	-11.0609	5.99402e-08	4.76923e-07	HomovsWT
CIB2	10518	ENSG00000136425	chr15	0.971216	1.78726	7.71491	3.49883e-06	2.95898e-05	HeterovsWT		EXT2	2132	ENSG00000151348	chr11	-0.657646	6.2708	-11.5286	3.6789e-08	3.21743e-07	HomovsWT
C12orf45	NA	NA	chr12	0.518984	4.95317	7.71402	3.50314e-06	2.96077e-05	HeterovsWT		PGF	5228	ENSG00000119630	chr14	-4.83307	-0.583518	-11.2923	4.6979e-08	3.92658e-07	HomovsWT
CREBBP	1387	ENSG00000005339	chr16	0.418428	6.91623	7.71061	3.51986e-06	2.97306e-05	HeterovsWT		MAN2A2	4122	ENSG00000196547	chr15	-0.624942	7.23004	-11.6133	3.37371e-08	2.98902e-07	HomovsWT
YEATS2	55689	ENSG00000163872	chr3	0.390177	6.81237	7.70227	3.56098e-06	3.00592e-05	HeterovsWT		R3HDM1	23518	ENSG00000048991	chr2	-0.889344	6.65194	-11.5541	3.5841e-08	3.14873e-07	HomovsWT
MEX3B	84206	ENSG00000183496	chr15	0.816582	4.11164	7.69974	3.5736e-06	3.0147e-05	HeterovsWT		WSB2	55884	ENSG00000176871	chr12	0.677544	5.30339	11.3842	4.26987e-08	3.64051e-07	HomovsWT
TIMELESS	8914	ENSG00000111602	chr12	0.392677	6.80889	7.69924	3.5761e-06	3.01493e-05	HeterovsWT		LINC01151	104266958	NA	chr8	-5.67603	-1.38894	-11.3686	4.33958e-08	3.68607e-07	HomovsWT
NR1D2	9975	ENSG00000174738	chr3	-0.454682	5.48454	-7.69852	3.57967e-06	3.01608e-05	HeterovsWT		DDX59	83479	ENSG00000118197	chr1	-1.14538	4.04715	-11.1429	5.49583e-08	4.45904e-07	HomovsWT
AC010896.1	NA	NA	chr2	2.45584	-0.165926	7.69758	3.58438e-06	3.01653e-05	HeterovsWT		AC002454.1	NA	NA	chr7	-2.18146	0.981972	-10.7525	8.34757e-08	6.2987e-07	HomovsWT
S100A9	6280	ENSG00000163220	chr1	-1.73694	0.216058	-7.6975	3.58478e-06	3.01653e-05	HeterovsWT		ASIC2	40	ENSG00000108684	chr17	-4.50645	-0.138277	-10.9765	6.55769e-08	5.14835e-07	HomovsWT
TRIM27	5987	ENSG00000237462	chr6	0.338825	7.69989	7.69708	3.58688e-06	3.01653e-05	HeterovsWT		DYRK1A	1859	ENSG00000157540	chr21	0.515941	8.41375	11.6288	3.32088e-08	2.94991e-07	HomovsWT
DAB2IP	153090	ENSG00000136848	chr9	1.57054	2.51407	7.6951	3.59681e-06	3.02301e-05	HeterovsWT		NDUFAF6	137682	ENSG00000156170	chr8	0.689429	6.20447	11.4634	3.93433e-08	3.39493e-07	HomovsWT
MRPS5	64969	ENSG00000144029	chr2	0.465038	5.98498	7.69297	3.60749e-06	3.03012e-05	HeterovsWT		TFB1M	51106	ENSG00000029639	chr6	-0.625055	5.36133	-11.3428	4.45733e-08	3.75322e-07	HomovsWT
LINC01731	105371226	NA	chr1	-1.80108	-1.11661	-7.69176	3.61362e-06	3.03173e-05	HeterovsWT		MED28	80306	ENSG00000118579	chr4	0.575427	6.69797	11.5086	3.75542e-08	3.26776e-07	HomovsWT
CTCF	10664	ENSG00000102974	chr16	0.360814	6.56784	7.6917	3.61388e-06	3.03173e-05	HeterovsWT		PIMREG	54478	ENSG00000129195	chr17	0.702961	5.09116	11.2958	4.68079e-08	3.91709e-07	HomovsWT
COL22A1	169044	ENSG00000169436	chr8	-2.76088	-0.620445	-7.68723	3.63651e-06	3.04883e-05	HeterovsWT		GALNT14	79623	ENSG00000158089	chr2	-0.598611	6.81179	-11.5143	3.7336e-08	3.2548e-07	HomovsWT
ALDH1A1	216	ENSG00000165092	chr9	-1.62994	-0.552449	-7.6852	3.64684e-06	3.05184e-05	HeterovsWT		SBDSP1	155370	ENSG00000225648	chr7	-0.858129	4.61665	-11.2726	4.79568e-08	3.99111e-07	HomovsWT
OVGP1	5016	ENSG00000085465	chr1	-1.26376	1.3373	-7.68526	3.64656e-06	3.05184e-05	HeterovsWT		WEE1	7465	ENSG00000166483	chr11	0.646856	6.81826	11.5128	3.7391e-08	3.25751e-07	HomovsWT
RPUSD4	84881	ENSG00000165526	chr11	0.578895	5.58305	7.68598	3.64286e-06	3.05184e-05	HeterovsWT		KCTD2	23510	ENSG00000180901	chr17	0.864911	4.83316	11.2545	4.88764e-08	4.0577e-07	HomovsWT
PPARA	5465	ENSG00000186951	chr22	0.719437	4.72035	7.68264	3.65992e-06	3.0609e-05	HeterovsWT		GIMAP6	474344	ENSG00000133561	chr7	-5.88837	-0.671311	-11.2766	4.77572e-08	3.97937e-07	HomovsWT
DUSP6	1848	ENSG00000139318	chr12	-0.636529	5.97988	-7.68145	3.66597e-06	3.06408e-05	HeterovsWT		STEAP3	55240	ENSG00000115107	chr2	-0.935507	4.08728	-11.1102	5.6887e-08	4.56913e-07	HomovsWT
MRPS18B	28973	ENSG00000229861	chr6	0.371591	7.01895	7.68071	3.66976e-06	3.06536e-05	HeterovsWT		EPB41L5	57669	ENSG00000115109	chr2	-3.60081	-0.392255	-10.9644	6.64311e-08	5.19739e-07	HomovsWT
LINC02762	283140	ENSG00000250303	chr11	-1.01647	2.74581	-7.6788	3.67961e-06	3.07169e-05	HeterovsWT		ATP6V0E2-AS1	401431	ENSG00000204934	chr7	1.26664	2.36685	10.8672	7.37328e-08	5.67388e-07	HomovsWT
ZNHIT1	10467	ENSG00000106400	chr7	-0.84721	6.55911	-7.67191	3.71518e-06	3.09806e-05	HeterovsWT		SLC66A2	80148	ENSG00000122490	chr18	1.22525	7.41505	11.5345	3.65696e-08	3.20238e-07	HomovsWT
DIDO1	11083	ENSG00000101191	chr20	0.338573	8.10588	7.6718	3.71576e-06	3.09806e-05	HeterovsWT		DRP2	1821	ENSG00000102385	chrX	-1.57652	2.24358	-10.8005	7.92452e-08	6.0365e-07	HomovsWT
SLITRK5	26050	ENSG00000165300	chr13	4.41391	-1.75993	7.66975	3.72646e-06	3.10128e-05	HeterovsWT		TBXAS1	6916	ENSG00000059377	chr7	0.497201	7.20418	11.53	3.67365e-08	3.21492e-07	HomovsWT
RCAN1	1827	ENSG00000159200	chr21	-0.343178	6.50711	-7.67009	3.72466e-06	3.10128e-05	HeterovsWT		MINK1	50488	ENSG00000141503	chr17	0.611765	6.34574	11.4456	4.00718e-08	3.44683e-07	HomovsWT
SNTB1	6641	ENSG00000172164	chr8	-0.348417	8.01786	-7.6698	3.72616e-06	3.10128e-05	HeterovsWT		SYP	6855	ENSG00000102003	chrX	-2.49956	1.05326	-10.677	9.06341e-08	6.71572e-07	HomovsWT
YPEL1	29799	ENSG00000100027	chr22	0.703465	3.71908	7.6685	3.73298e-06	3.1029e-05	HeterovsWT		PJVK	494513	ENSG00000204311	chr2	-2.49292	0.775601	-10.687	8.96498e-08	6.66461e-07	HomovsWT
SKA2	348235	ENSG00000182628	chr17	0.513576	4.46896	7.66877	3.73153e-06	3.1029e-05	HeterovsWT		TMEM164	84187	ENSG00000157600	chrX	-0.537442	6.83589	-11.5085	3.75569e-08	3.26776e-07	HomovsWT
RBM43	375287	ENSG00000184898	chr2	0.591206	3.88488	7.66549	3.74869e-06	3.11405e-05	HeterovsWT		ANKIB1	54467	ENSG00000001629	chr7	-0.641452	7.01531	-11.5197	3.71286e-08	3.24088e-07	HomovsWT
ADCY7	113	ENSG00000121281	chr16	0.452865	7.17647	7.66354	3.75897e-06	3.12068e-05	HeterovsWT		MYBL1	4603	ENSG00000185697	chr8	1.03077	4.64048	11.2098	5.12191e-08	4.20846e-07	HomovsWT
NBPF1	55672	ENSG00000219481	chr1	-0.429212	6.07743	-7.66183	3.76796e-06	3.12623e-05	HeterovsWT		RBM14-RBM4	100526737	ENSG00000248643	chr11	0.806496	4.7762	11.2214	5.05977e-08	4.17001e-07	HomovsWT
GLO1	2739	ENSG00000124767	chr6	-0.603466	9.73587	-7.66107	3.77195e-06	3.12763e-05	HeterovsWT		MIR222HG	104457406	NA	chrX	-0.727038	5.73974	-11.3849	4.26678e-08	3.64017e-07	HomovsWT
CLSTN3	9746	ENSG00000139182	chr12	0.757084	3.99222	7.65684	3.79436e-06	3.1443e-05	HeterovsWT		SLC7A8	23428	ENSG00000092068	chr14	-1.88942	1.65613	-10.6845	8.98988e-08	6.67946e-07	HomovsWT
HLA-DPA3	267013	NA	chr6	-1.75243	1.17916	-7.65589	3.79939e-06	3.14463e-05	HeterovsWT		AGT	183	ENSG00000135744	chr1	-6.93236	-0.647664	-11.1895	5.23237e-08	4.27851e-07	HomovsWT
NPRL3	8131	ENSG00000103148	chr16	0.557037	5.96425	7.65613	3.79814e-06	3.14463e-05	HeterovsWT		XKR8	55113	ENSG00000158156	chr1	-1.37494	2.65537	-10.795	7.9716e-08	6.06896e-07	HomovsWT
MYBL2	4605	ENSG00000101057	chr20	0.519695	8.7587	7.65132	3.82379e-06	3.1629e-05	HeterovsWT		KIAA1143	57456	ENSG00000281665	chr3	0.696368	7.02791	11.4846	3.84899e-08	3.33187e-07	HomovsWT
AL133410.1	NA	NA	chr9	-1.46782	0.752377	-7.64472	3.85931e-06	3.19034e-05	HeterovsWT		RNF220	55182	ENSG00000187147	chr1	-0.555693	8.49899	-11.567	3.5371e-08	3.11347e-07	HomovsWT
XXYLT1	152002	ENSG00000173950	chr3	-0.428877	6.11493	-7.63223	3.92751e-06	3.24473e-05	HeterovsWT		TK1	7083	ENSG00000167900	chr17	0.847419	6.03917	11.3772	4.30094e-08	3.6624e-07	HomovsWT
IPO5	3843	ENSG00000065150	chr13	0.316735	9.83753	7.62787	3.95161e-06	3.26266e-05	HeterovsWT		EMC7	56851	ENSG00000134153	chr15	-0.654128	5.90751	-11.3713	4.3273e-08	3.67793e-07	HomovsWT
SLC37A4	2542	ENSG00000137700	chr11	0.520151	5.66171	7.62694	3.9568e-06	3.26496e-05	HeterovsWT		SEC14L1	6397	ENSG00000129657	chr17	0.782071	5.12073	11.2645	4.83664e-08	4.02027e-07	HomovsWT
LYSMD2	256586	ENSG00000140280	chr15	-0.644236	5.37189	-7.61822	4.00553e-06	3.30317e-05	HeterovsWT		ALDH4A1	8659	ENSG00000159423	chr1	0.90266	6.5748	11.4345	4.0534e-08	3.48439e-07	HomovsWT
AC100775.1	NA	NA	chr18	-0.685954	4.37651	-7.61079	4.04756e-06	3.3358e-05	HeterovsWT		AC134508.2	NA	NA	chr3	1.9335	1.01948	10.6425	9.41175e-08	6.92848e-07	HomovsWT
KIFC3	3801	ENSG00000140859	chr16	-1.14367	0.47541	-7.60489	4.08127e-06	3.36154e-05	HeterovsWT		MPI	4351	ENSG00000178802	chr15	-0.767129	5.19035	-11.2356	4.98486e-08	4.11597e-07	HomovsWT
GNAS	2778	ENSG00000087460	chr20	0.472477	9.77326	7.60064	4.10577e-06	3.37967e-05	HeterovsWT		ROPN1L	83853	ENSG00000145491	chr5	-1.91652	1.65096	-10.6789	9.04409e-08	6.70873e-07	HomovsWT
MICU1	10367	ENSG00000107745	chr10	0.376343	6.29951	7.59999	4.10951e-06	3.3807e-05	HeterovsWT		KLHL17	339451	ENSG00000187961	chr1	1.32023	4.63363	11.135	5.54132e-08	4.48791e-07	HomovsWT
HDDC2	51020	ENSG00000111906	chr6	-0.515564	5.35482	-7.5979	4.12163e-06	3.38862e-05	HeterovsWT		RBM15B	29890	ENSG00000259956	chr3	0.669941	7.42177	11.493	3.81596e-08	3.30749e-07	HomovsWT
SGTA	6449	ENSG00000104969	chr19	-0.458744	6.45613	-7.59326	4.14863e-06	3.40669e-05	HeterovsWT		EMD	2010	ENSG00000102119	chrX	-0.815551	4.83035	-11.2194	5.07046e-08	4.17629e-07	HomovsWT
GSTP1	2950	ENSG00000084207	chr11	0.889367	8.91852	7.59338	4.14793e-06	3.40669e-05	HeterovsWT		CABIN1	23523	ENSG00000099991	chr22	0.613819	7.91528	11.5223	3.70282e-08	3.2342e-07	HomovsWT
UBL4A	8266	ENSG00000102178	chrX	-0.526131	6.42938	-7.5876	4.18183e-06	3.43188e-05	HeterovsWT		PTPN4	5775	ENSG00000088179	chr2	-0.724482	5.96202	-11.3588	4.38398e-08	3.70904e-07	HomovsWT
NR3C2	4306	ENSG00000151623	chr4	-1.87558	-0.487324	-7.5846	4.19951e-06	3.44431e-05	HeterovsWT		TMEM135	65084	ENSG00000166575	chr11	0.79443	5.90646	11.3335	4.50079e-08	3.78278e-07	HomovsWT
PCCA	5095	ENSG00000175198	chr13	-0.35094	7.25003	-7.58119	4.21976e-06	3.45883e-05	HeterovsWT		REPS2	9185	ENSG00000169891	chrX	-1.18426	3.05273	-10.9067	7.06658e-08	5.48761e-07	HomovsWT
PTPN9	5780	ENSG00000169410	chr15	-0.360497	6.55364	-7.57788	4.23949e-06	3.4729e-05	HeterovsWT		PCNX2	80003	ENSG00000135749	chr1	-1.08454	4.88188	-11.1923	5.21687e-08	4.2684e-07	HomovsWT
TACC3	10460	ENSG00000013810	chr4	0.572669	8.22648	7.57478	4.25808e-06	3.48603e-05	HeterovsWT		CDC14B	8555	ENSG00000081377	chr9	-2.2331	0.875486	-10.6232	9.61333e-08	7.04631e-07	HomovsWT
TFE3	7030	ENSG00000068323	chrX	-0.440333	5.26365	-7.56824	4.29749e-06	3.51618e-05	HeterovsWT		MYORG	57462	ENSG00000164976	chr9	0.882394	3.81304	11.0223	6.24518e-08	4.94301e-07	HomovsWT
INAVA	55765	ENSG00000163362	chr1	-0.52076	4.16964	-7.56211	4.33486e-06	3.54462e-05	HeterovsWT		UROD	7389	ENSG00000126088	chr1	0.982427	5.94482	11.3191	4.56839e-08	3.83248e-07	HomovsWT
AC073578.2	NA	NA	chr12	-1.1046	1.88355	-7.56147	4.33876e-06	3.54567e-05	HeterovsWT		MAP3K9	4293	ENSG00000006432	chr14	0.797774	4.60557	11.1363	5.53418e-08	4.48748e-07	HomovsWT
SDHAF4	135154	ENSG00000154079	chr6	-0.629704	3.48772	-7.55898	4.35405e-06	3.55389e-05	HeterovsWT		HTATIP2	10553	ENSG00000109854	chr11	-0.781407	5.45772	-11.2356	4.9851e-08	4.11597e-07	HomovsWT
PASK	23178	ENSG00000115687	chr2	0.576167	5.0253	7.55905	4.3536e-06	3.55389e-05	HeterovsWT		AL139352.1	NA	NA	chr20	-4.14689	-1.72052	-11.1579	5.40904e-08	4.3973e-07	HomovsWT
PRAG1	157285	ENSG00000275342	chr8	-0.432857	5.2116	-7.55587	4.37319e-06	3.56737e-05	HeterovsWT		EXOSC9	5393	ENSG00000123737	chr4	0.74792	5.41021	11.2441	4.94115e-08	4.09211e-07	HomovsWT
SLC50A1	55974	ENSG00000169241	chr1	-0.524592	4.87193	-7.55463	4.38087e-06	3.56948e-05	HeterovsWT		IFI16	3428	ENSG00000163565	chr1	-1.11364	7.00035	-11.4273	4.0834e-08	3.50573e-07	HomovsWT
AC090825.1	NA	NA	chr15	-0.501132	5.25401	-7.5542	4.38356e-06	3.56948e-05	HeterovsWT		TNKS1BP1	85456	ENSG00000149115	chr11	0.855474	5.5903	11.2259	5.03588e-08	4.15537e-07	HomovsWT
NIBAN1	116496	ENSG00000135842	chr1	-0.335902	7.75362	-7.55418	4.38367e-06	3.56948e-05	HeterovsWT		KLC1	3831	ENSG00000126214	chr14	0.811801	5.45894	11.246	4.93128e-08	4.08643e-07	HomovsWT
KCTD2	23510	ENSG00000180901	chr17	0.593018	4.83316	7.54294	4.45386e-06	3.62446e-05	HeterovsWT		LIMA1	51474	ENSG00000050405	chr12	-0.99855	4.88332	-11.1146	5.66246e-08	4.55678e-07	HomovsWT
CCDC146	57639	ENSG00000135205	chr7	-0.841934	3.45332	-7.54151	4.46287e-06	3.62963e-05	HeterovsWT		C2CD2	25966	ENSG00000157617	chr21	0.62776	6.15196	11.3341	4.49784e-08	3.78265e-07	HomovsWT
EPAS1	2034	ENSG00000116016	chr2	-0.472858	5.17161	-7.53819	4.4839e-06	3.64455e-05	HeterovsWT		TSPOAP1	9256	ENSG00000005379	chr17	1.66828	2.35709	10.6833	9.00125e-08	6.68425e-07	HomovsWT
CREB5	9586	ENSG00000146592	chr7	-1.01807	1.54309	-7.53664	4.49369e-06	3.65032e-05	HeterovsWT		DOCK11	139818	ENSG00000147251	chrX	-0.683218	7.84711	-11.4759	3.8838e-08	3.35985e-07	HomovsWT
KCNN4	3783	ENSG00000104783	chr19	0.437664	6.32064	7.53619	4.49658e-06	3.65048e-05	HeterovsWT		ANKS1B	56899	ENSG00000185046	chr12	-2.16842	1.73188	-10.5782	1.01008e-07	7.34027e-07	HomovsWT
MMP8	4317	ENSG00000118113	chr11	-3.08204	-0.983036	-7.53565	4.5e-06	3.65108e-05	HeterovsWT		AC141557.1	NA	NA	chr12	-0.788195	4.96113	-11.1636	5.37714e-08	4.38245e-07	HomovsWT
RHOU	58480	ENSG00000284984	chr1	-0.3664	7.09073	-7.53051	4.53287e-06	3.67555e-05	HeterovsWT		PGM1	5236	ENSG00000079739	chr1	0.526126	7.13043	11.4159	4.13207e-08	3.5408e-07	HomovsWT
AC145207.5	NA	NA	chr17	0.573716	4.73259	7.526	4.56191e-06	3.69689e-05	HeterovsWT		ERLIN1	10613	ENSG00000107566	chr10	-0.535893	8.93246	-11.4964	3.8026e-08	3.30012e-07	HomovsWT
SSBP2	23635	ENSG00000145687	chr5	-0.822928	5.45403	-7.52549	4.56522e-06	3.69736e-05	HeterovsWT		MBD5	55777	ENSG00000204406	chr2	-0.820318	6.19779	-11.317	4.57842e-08	3.83853e-07	HomovsWT
JPT1	51155	ENSG00000189159	chr17	0.439114	5.96904	7.52357	4.57766e-06	3.70523e-05	HeterovsWT		C8G	733	ENSG00000176919	chr9	-3.11651	0.95611	-10.5609	1.02948e-07	7.45334e-07	HomovsWT
DENND4A	10260	ENSG00000174485	chr15	-0.51844	6.52472	-7.51996	4.60111e-06	3.72199e-05	HeterovsWT		TMEM41B	440026	ENSG00000166471	chr11	0.724681	5.27017	11.2016	5.16595e-08	4.23695e-07	HomovsWT
UBE2E3	10477	ENSG00000170035	chr2	0.450908	5.33996	7.51816	4.61283e-06	3.72925e-05	HeterovsWT		AFG3L1P	172	ENSG00000223959	chr16	0.808238	5.38082	11.1942	5.20645e-08	4.26245e-07	HomovsWT
RFLNB	359845	ENSG00000283979	chr17	-0.356053	8.48583	-7.51754	4.61693e-06	3.73035e-05	HeterovsWT		NIFK	84365	ENSG00000155438	chr2	-0.799784	4.62456	-11.0748	5.90592e-08	4.72126e-07	HomovsWT
MYRIP	25924	ENSG00000170011	chr3	3.82836	0.00498498	7.51559	4.62965e-06	3.73223e-05	HeterovsWT		SRSF10	10772	ENSG00000188529	chr1	0.567147	8.1365	11.4501	3.98855e-08	3.43516e-07	HomovsWT
YPEL5	51646	ENSG00000119801	chr2	-0.647615	4.34158	-7.51619	4.62574e-06	3.73223e-05	HeterovsWT		MUC1	4582	ENSG00000185499	chr1	-3.30425	0.257941	-10.6871	8.96369e-08	6.66461e-07	HomovsWT
PDP2	57546	ENSG00000172840	chr16	-0.398406	5.58349	-7.5155	4.63025e-06	3.73223e-05	HeterovsWT		RBM23	55147	ENSG00000100461	chr14	0.662576	6.12188	11.2859	4.72962e-08	3.95066e-07	HomovsWT
MICAL3	57553	ENSG00000243156	chr22	0.412551	6.06372	7.51595	4.62735e-06	3.73223e-05	HeterovsWT		SMAD2	4087	ENSG00000175387	chr18	0.813137	8.07237	11.4316	4.06522e-08	3.49234e-07	HomovsWT
UBQLN2	29978	ENSG00000188021	chrX	-0.525846	5.3129	-7.5142	4.6388e-06	3.73247e-05	HeterovsWT		AC021752.1	NA	NA	chr15	-1.63595	2.58466	-10.6647	9.18649e-08	6.7921e-07	HomovsWT
SERPINE2	5270	ENSG00000135919	chr2	0.380515	6.74476	7.51432	4.638e-06	3.73247e-05	HeterovsWT		FKBP5	2289	ENSG00000096060	chr6	0.68082	7.62013	11.4074	4.16852e-08	3.56305e-07	HomovsWT
TMBIM6	7009	ENSG00000139644	chr12	0.326358	9.12966	7.51497	4.63377e-06	3.73247e-05	HeterovsWT		AC009303.2	NA	NA	chr2	-2.68637	0.690764	-10.613	9.72126e-08	7.10625e-07	HomovsWT
IDNK	414328	ENSG00000148057	chr9	-0.838185	3.04402	-7.50997	4.66675e-06	3.75274e-05	HeterovsWT		CDC25A	993	ENSG00000164045	chr3	0.502868	7.31398	11.386	4.26193e-08	3.63831e-07	HomovsWT
SRGAP3	9901	ENSG00000196220	chr3	-0.562586	5.27188	-7.50811	4.67902e-06	3.75816e-05	HeterovsWT		ARHGAP27	201176	ENSG00000276907	chr17	0.613297	6.10779	11.2733	4.79236e-08	3.99079e-07	HomovsWT
JUND	3727	ENSG00000130522	chr19	-0.810924	5.85979	-7.50842	4.67702e-06	3.75816e-05	HeterovsWT		AMZ1	155185	ENSG00000174945	chr7	0.907671	4.78572	11.115	5.66e-08	4.55678e-07	HomovsWT
ZFX	7543	ENSG00000005889	chrX	-0.355538	6.74429	-7.50486	4.70065e-06	3.7733e-05	HeterovsWT		TRIM9	114088	ENSG00000100505	chr14	-1.35786	2.95868	-10.7477	8.39103e-08	6.32096e-07	HomovsWT
CPNE4	131034	ENSG00000196353	chr3	-1.68008	0.293198	-7.49979	4.73462e-06	3.79427e-05	HeterovsWT		SLC22A4	6583	ENSG00000197208	chr5	-1.3455	2.50539	-10.6934	8.90212e-08	6.63239e-07	HomovsWT
AC097634.4	NA	NA	chr3	-0.926417	2.01296	-7.49971	4.73515e-06	3.79427e-05	HeterovsWT		PRKRIP1	79706	ENSG00000128563	chr7	0.823984	5.44823	11.1627	5.38207e-08	4.38245e-07	HomovsWT
TPPP	11076	ENSG00000171368	chr5	0.703173	3.64618	7.50035	4.73086e-06	3.79427e-05	HeterovsWT		MYO7A	4647	ENSG00000137474	chr11	-0.904368	4.72383	-11.0733	5.91532e-08	4.726e-07	HomovsWT
ZNF44	51710	ENSG00000197857	chr19	0.919856	2.54534	7.4978	4.74799e-06	3.80231e-05	HeterovsWT		RTL6	84247	ENSG00000188636	chr22	-0.645515	5.33082	-11.1354	5.53928e-08	4.48791e-07	HomovsWT
CRYL1	51084	ENSG00000165475	chr13	-0.507754	4.54087	-7.49534	4.76463e-06	3.81338e-05	HeterovsWT		PECR	55825	ENSG00000115425	chr2	-1.22108	2.66759	-10.7114	8.72971e-08	6.52902e-07	HomovsWT
HSD17B11	51170	ENSG00000198189	chr4	0.455921	5.87642	7.49427	4.77184e-06	3.81691e-05	HeterovsWT		ATP8A1	10396	ENSG00000124406	chr4	0.837313	4.86024	11.0892	5.81639e-08	4.66003e-07	HomovsWT
GBAP1	2630	ENSG00000160766	chr1	0.722185	3.20525	7.49154	4.79037e-06	3.82948e-05	HeterovsWT		ANKRD16	54522	ENSG00000134461	chr10	-1.09822	3.83258	-10.8897	7.19683e-08	5.57283e-07	HomovsWT
ARL15	54622	ENSG00000185305	chr5	-0.527313	5.60612	-7.48934	4.80536e-06	3.8392e-05	HeterovsWT		B3GNT8	374907	ENSG00000177191	chr19	1.65674	1.95241	10.5869	1.00045e-07	7.27802e-07	HomovsWT
RASSF4	83937	ENSG00000107551	chr10	-0.520062	6.22795	-7.48805	4.8142e-06	3.844e-05	HeterovsWT		HSPA1B	3304	ENSG00000204388	chr6	1.19202	3.1191	10.7672	8.21497e-08	6.22285e-07	HomovsWT
SH3GL1	6455	ENSG00000141985	chr19	-0.431112	5.97964	-7.48256	4.8519e-06	3.86955e-05	HeterovsWT		NRM	11270	ENSG00000206484	chr6	1.0394	5.44541	11.1334	5.55085e-08	4.49295e-07	HomovsWT
HIST1H2BF	NA	NA	chr6	0.639572	7.22392	7.48258	4.85174e-06	3.86955e-05	HeterovsWT		TARSL2	NA	NA	chr15	-0.965583	4.63129	-11.0203	6.25842e-08	4.95061e-07	HomovsWT
ZNF7	7553	ENSG00000147789	chr8	0.542601	4.41069	7.47948	4.87322e-06	3.88428e-05	HeterovsWT		RP2	6102	ENSG00000102218	chrX	-0.568091	6.06581	-11.2385	4.9702e-08	4.10866e-07	HomovsWT
MGAM	8972	ENSG00000257335	chr7	-1.02827	3.27212	-7.47651	4.89382e-06	3.89744e-05	HeterovsWT		CYP3A4	1576	ENSG00000160868	chr7	-3.89599	-0.758141	-10.7365	8.49384e-08	6.38071e-07	HomovsWT
AKNA	80709	ENSG00000106948	chr9	-0.381035	7.82328	-7.47627	4.89547e-06	3.89744e-05	HeterovsWT		LGALS9B	284194	ENSG00000170298	chr17	1.86504	1.88168	10.5871	1.00025e-07	7.27802e-07	HomovsWT
RRAGD	58528	ENSG00000025039	chr6	0.399378	6.53723	7.47365	4.91377e-06	3.90971e-05	HeterovsWT		RBM48	84060	ENSG00000127993	chr7	-0.83483	4.47111	-11.0114	6.31765e-08	4.98584e-07	HomovsWT
ACVRL1	94	ENSG00000139567	chr12	-1.91081	-1.43744	-7.4721	4.92462e-06	3.91376e-05	HeterovsWT		PQBP1	10084	ENSG00000102103	chrX	-0.826077	5.42077	-11.1289	5.57754e-08	4.51005e-07	HomovsWT
MTMR7	9108	ENSG00000003987	chr8	-0.80662	2.62795	-7.47251	4.92178e-06	3.91376e-05	HeterovsWT		ORAI2	80228	ENSG00000160991	chr7	0.865927	7.08716	11.3159	4.58386e-08	3.84071e-07	HomovsWT
TTI1	9675	ENSG00000101407	chr20	0.36784	6.93291	7.46864	4.94894e-06	3.93079e-05	HeterovsWT		CERK	64781	ENSG00000100422	chr22	0.673233	5.7595	11.171	5.33527e-08	4.35479e-07	HomovsWT
PKN3	29941	ENSG00000160447	chr9	0.952285	3.86179	7.46684	4.96165e-06	3.93398e-05	HeterovsWT		PDE2A	5138	ENSG00000186642	chr11	-3.32983	0.159361	-10.5063	1.09358e-07	7.87122e-07	HomovsWT
MGAT4A	11320	ENSG00000071073	chr2	0.435113	5.95523	7.46719	4.95917e-06	3.93398e-05	HeterovsWT		BLACE	338436	ENSG00000204960	chr7	-0.553305	5.66433	-11.1958	5.19757e-08	4.25774e-07	HomovsWT
CD4	920	ENSG00000010610	chr12	0.338993	8.16658	7.46716	4.95936e-06	3.93398e-05	HeterovsWT		HOXC4	3221	ENSG00000198353	chr12	-0.747281	4.84565	-11.0007	6.39023e-08	5.03434e-07	HomovsWT
MYO16	23026	ENSG00000041515	chr13	-1.05219	2.59766	-7.46096	5.00332e-06	3.96471e-05	HeterovsWT		UNK	85451	ENSG00000132478	chr17	0.617445	5.40512	11.1028	5.73367e-08	4.60037e-07	HomovsWT
CD81	975	ENSG00000110651	chr11	1.88484	0.135682	7.4591	5.01661e-06	3.97292e-05	HeterovsWT		GLB1	2720	ENSG00000170266	chr3	-0.522517	8.14459	-11.3578	4.38847e-08	3.70904e-07	HomovsWT
ODF2L	57489	ENSG00000122417	chr1	0.567059	5.01892	7.45598	5.03893e-06	3.98827e-05	HeterovsWT		SMAD5	4090	ENSG00000113658	chr5	-0.623902	5.47275	-11.1287	5.57862e-08	4.51005e-07	HomovsWT
ADGRE4P	326342	ENSG00000268758	chr19	-2.18132	-1.68346	-7.45544	5.04284e-06	3.98904e-05	HeterovsWT		LHX6	26468	ENSG00000106852	chr9	3.96555	-0.0631508	10.7336	8.52088e-08	6.39749e-07	HomovsWT
ABTB2	25841	ENSG00000166016	chr11	0.66957	3.78672	7.45367	5.05557e-06	3.99679e-05	HeterovsWT		AC244453.3	NA	NA	chr1	-4.18035	-1.5849	-11.0418	6.11695e-08	4.85566e-07	HomovsWT
BRD3	8019	ENSG00000169925	chr9	0.467444	5.87409	7.45213	5.06669e-06	4.00324e-05	HeterovsWT		MTCP1	4515	ENSG00000214827	chrX	-0.94661	4.16466	-10.9418	6.80534e-08	5.31513e-07	HomovsWT
LY86	9450	ENSG00000112799	chr6	-0.636554	3.55834	-7.44749	5.10028e-06	4.02744e-05	HeterovsWT		RPN1	6184	ENSG00000163902	chr3	0.501145	8.85842	11.3772	4.30089e-08	3.6624e-07	HomovsWT
MAST3	23031	ENSG00000099308	chr19	-0.444815	5.85283	-7.44306	5.1326e-06	4.04996e-05	HeterovsWT		POLR1C	9533	ENSG00000171453	chr6	-0.622673	5.11875	-11.0583	6.01057e-08	4.77721e-07	HomovsWT
SLC9A3R1	9368	ENSG00000109062	chr17	-0.467715	7.1501	-7.44277	5.13476e-06	4.04996e-05	HeterovsWT		INTS1	26173	ENSG00000164880	chr7	0.962977	8.67514	11.3667	4.34781e-08	3.69075e-07	HomovsWT
ANKRD28	23243	ENSG00000206560	chr3	-0.362179	7.15677	-7.44143	5.14454e-06	4.05532e-05	HeterovsWT		NT5DC3	51559	ENSG00000111696	chr12	0.586107	7.04167	11.2824	4.74701e-08	3.96275e-07	HomovsWT
IL16	3603	ENSG00000172349	chr15	-0.544531	4.18875	-7.43566	5.18708e-06	4.08648e-05	HeterovsWT		PLAGL1	5325	ENSG00000118495	chr6	1.00877	4.98745	10.9702	6.60206e-08	5.17422e-07	HomovsWT
KIAA1958	158405	ENSG00000165185	chr9	0.449074	7.38531	7.43494	5.19247e-06	4.08835e-05	HeterovsWT		FGL1	2267	ENSG00000104760	chr8	-5.92693	0.180312	-10.7369	8.4904e-08	6.38071e-07	HomovsWT
MOSPD2	158747	ENSG00000130150	chrX	-0.584987	5.04787	-7.4345	5.19569e-06	4.08852e-05	HeterovsWT		EIF4EBP2	1979	ENSG00000148730	chr10	0.525102	8.62782	11.3602	4.37724e-08	3.70904e-07	HomovsWT
LRRC75A	388341	ENSG00000181350	chr17	1.66785	1.13933	7.43231	5.21198e-06	4.09896e-05	HeterovsWT		CEBPE	1053	ENSG00000092067	chr14	-1.46168	3.39013	-10.7467	8.40043e-08	6.32454e-07	HomovsWT
CST7	8530	ENSG00000077984	chr20	-0.387478	7.92769	-7.43067	5.22417e-06	4.10617e-05	HeterovsWT		NCKIPSD	51517	ENSG00000213672	chr3	0.911052	5.44023	11.0711	5.92946e-08	4.7345e-07	HomovsWT
DTWD2	285605	ENSG00000169570	chr5	-0.586397	3.57808	-7.42482	5.26805e-06	4.13827e-05	HeterovsWT		DNAH8	1769	ENSG00000124721	chr6	-4.28645	-0.119715	-10.6299	9.54292e-08	7.00605e-07	HomovsWT
ACAD10	80724	ENSG00000111271	chr12	0.509751	5.3664	7.4232	5.2802e-06	4.14541e-05	HeterovsWT		AC006453.2	NA	NA	chr2	-4.16315	-0.401819	-10.8212	7.74885e-08	5.91596e-07	HomovsWT
HELLPAR	101101692	NA	chr12	-0.967468	2.91748	-7.42245	5.28586e-06	4.14746e-05	HeterovsWT		PHF11	51131	ENSG00000136147	chr13	-1.12913	4.94548	-11.0255	6.2235e-08	4.93395e-07	HomovsWT
EHMT1	79813	ENSG00000181090	chr9	0.417325	7.13475	7.41966	5.30701e-06	4.16165e-05	HeterovsWT		NCKAP1L	3071	ENSG00000123338	chr12	0.441278	9.10041	11.3583	4.3859e-08	3.70904e-07	HomovsWT
MCM10	55388	ENSG00000065328	chr10	0.404605	6.12474	7.41904	5.3117e-06	4.16292e-05	HeterovsWT		DLG1	1739	ENSG00000075711	chr3	-0.709466	6.94881	-11.2536	4.89183e-08	4.05869e-07	HomovsWT
CFAP44	55779	ENSG00000206530	chr3	-0.716277	3.06177	-7.41729	5.32505e-06	4.16639e-05	HeterovsWT		AC138150.1	NA	NA	chr17	1.45278	2.56447	10.5442	1.04867e-07	7.5663e-07	HomovsWT
JCAD	57608	ENSG00000165757	chr10	-0.678561	3.8158	-7.41725	5.32533e-06	4.16639e-05	HeterovsWT		SBDS	51119	ENSG00000126524	chr7	-0.798252	5.52438	-11.1136	5.66813e-08	4.55678e-07	HomovsWT
ZXDB	158586	ENSG00000198455	chrX	-0.608076	4.02767	-7.41749	5.32349e-06	4.16639e-05	HeterovsWT		ATP11A	23250	ENSG00000068650	chr13	0.467484	9.04033	11.3457	4.44382e-08	3.74649e-07	HomovsWT
E2F6	1876	ENSG00000169016	chr2	0.449365	5.76834	7.41523	5.34072e-06	4.17603e-05	HeterovsWT		PDHA1	5160	ENSG00000131828	chrX	-0.659078	7.03239	-11.2467	4.92735e-08	4.08567e-07	HomovsWT
SETD7	80854	ENSG00000145391	chr4	-0.475378	6.8546	-7.40984	5.38204e-06	4.20592e-05	HeterovsWT		NKAP	79576	ENSG00000101882	chrX	-1.00196	3.26373	-10.7557	8.3187e-08	6.2909e-07	HomovsWT
PIP5K1C	23396	ENSG00000186111	chr19	-0.47726	6.57044	-7.40682	5.40537e-06	4.22172e-05	HeterovsWT		VWA5A	4013	ENSG00000110002	chr11	-2.17939	1.79819	-10.4507	1.16313e-07	8.2884e-07	HomovsWT
C9orf72	203228	ENSG00000147894	chr9	-0.4461	4.97259	-7.40358	5.43048e-06	4.23889e-05	HeterovsWT		ZCCHC14	23174	ENSG00000140948	chr16	0.555216	6.43063	11.163	5.38053e-08	4.38245e-07	HomovsWT
SH3BP5L	80851	ENSG00000175137	chr1	0.522424	6.06552	7.40102	5.45039e-06	4.25199e-05	HeterovsWT		GARS-DT	NA	NA	chr7	0.549149	6.22188	11.1537	5.43359e-08	4.41118e-07	HomovsWT
NEK2	4751	ENSG00000117650	chr1	0.504284	5.76655	7.40029	5.45611e-06	4.25401e-05	HeterovsWT		SFXN4	119559	ENSG00000183605	chr10	-0.713879	5.7157	-11.0698	5.93781e-08	4.73839e-07	HomovsWT
LINC02100	107986408	NA	chr5	-0.874207	3.14991	-7.39776	5.4759e-06	4.267e-05	HeterovsWT		MLKL	197259	ENSG00000168404	chr16	-0.726746	4.72018	-10.9362	6.84631e-08	5.34406e-07	HomovsWT
TUBB4B	10383	ENSG00000188229	chr9	0.433329	7.60172	7.39643	5.48638e-06	4.27271e-05	HeterovsWT		INSIG2	51141	ENSG00000125629	chr2	-0.774764	5.42683	-11.0245	6.23057e-08	4.93432e-07	HomovsWT
DGCR8	54487	ENSG00000128191	chr22	0.389992	6.29975	7.39534	5.49493e-06	4.27446e-05	HeterovsWT		TMOD2	29767	ENSG00000128872	chr15	-0.85504	5.5123	-11.0827	5.85681e-08	4.68476e-07	HomovsWT
SYPL1	6856	ENSG00000008282	chr7	0.372444	7.33227	7.39548	5.49387e-06	4.27446e-05	HeterovsWT		PGM2L1	283209	ENSG00000165434	chr11	1.2697	3.80097	10.7755	8.1414e-08	6.17056e-07	HomovsWT
TMEM9	252839	ENSG00000116857	chr1	0.553834	4.99971	7.39487	5.49863e-06	4.27474e-05	HeterovsWT		IL17RE	132014	ENSG00000163701	chr3	-1.02825	3.98449	-10.7542	8.33248e-08	6.29431e-07	HomovsWT
ZC3H3	23144	ENSG00000014164	chr8	0.456222	6.69683	7.3945	5.50159e-06	4.27474e-05	HeterovsWT		SERPINE1	5054	ENSG00000106366	chr7	-2.70903	-0.317239	-10.4265	1.19481e-07	8.4785e-07	HomovsWT
LIG1	3978	ENSG00000105486	chr19	0.456129	7.24506	7.39274	5.51543e-06	4.28305e-05	HeterovsWT		NSD1	64324	ENSG00000165671	chr5	0.488196	7.65668	11.2394	4.96543e-08	4.10721e-07	HomovsWT
CEACAM4	1089	ENSG00000105352	chr19	-0.685483	3.64461	-7.39208	5.52066e-06	4.28466e-05	HeterovsWT		ZNF282	8427	ENSG00000170265	chr7	0.649266	6.28128	11.1225	5.6153e-08	4.53161e-07	HomovsWT
GUSB	2990	ENSG00000169919	chr7	-0.433345	7.42669	-7.38997	5.53737e-06	4.29517e-05	HeterovsWT		LRRC28	123355	ENSG00000168904	chr15	-0.791888	4.39061	-10.8663	7.38039e-08	5.67613e-07	HomovsWT
HP1BP3	50809	ENSG00000127483	chr1	0.315594	8.53845	7.38906	5.54461e-06	4.29834e-05	HeterovsWT		DBNL	28988	ENSG00000136279	chr7	0.697028	6.78796	11.1659	5.36384e-08	4.37547e-07	HomovsWT
ACVR1	90	ENSG00000115170	chr2	-0.496589	3.87039	-7.38396	5.58524e-06	4.32737e-05	HeterovsWT		RPL10	6134	ENSG00000147403	chrX	-0.68101	10.0182	-11.3091	4.6163e-08	3.86551e-07	HomovsWT
IQGAP2	10788	ENSG00000145703	chr5	-0.40662	7.37321	-7.38242	5.59761e-06	4.33448e-05	HeterovsWT		SET	6418	ENSG00000119335	chr9	0.470167	9.45417	11.2781	4.76826e-08	3.9756e-07	HomovsWT
PPP4R4	57718	ENSG00000119698	chr14	-0.997092	2.7983	-7.37956	5.62064e-06	4.34983e-05	HeterovsWT		ZCCHC7	84186	ENSG00000147905	chr9	-0.71772	6.53548	-11.1139	5.66647e-08	4.55678e-07	HomovsWT
DUS3L	56931	ENSG00000141994	chr19	-0.486506	5.64094	-7.37637	5.64642e-06	4.36729e-05	HeterovsWT		PTPRU	10076	ENSG00000060656	chr1	-0.809299	4.79671	-10.9244	6.93401e-08	5.4032e-07	HomovsWT
SRPK3	26576	ENSG00000184343	chrX	-0.979454	3.39417	-7.37253	5.67765e-06	4.38895e-05	HeterovsWT		AL592429.2	NA	NA	chr6	-1.78543	2.29499	-10.4097	1.21743e-07	8.61653e-07	HomovsWT
ANK2	287	ENSG00000145362	chr4	-0.652067	3.86693	-7.36819	5.71311e-06	4.41385e-05	HeterovsWT		THSD4	79875	ENSG00000187720	chr15	-5.32006	-1.79244	-10.895	7.15613e-08	5.54764e-07	HomovsWT
SDHC	6391	ENSG00000143252	chr1	0.358778	6.91633	7.3664	5.72779e-06	4.42267e-05	HeterovsWT		DLX2	1746	ENSG00000115844	chr2	-2.56989	1.33489	-10.3224	1.34247e-07	9.32655e-07	HomovsWT
AC100803.2	NA	NA	chr8	2.37338	-0.441157	7.36561	5.73431e-06	4.42268e-05	HeterovsWT		ERC1	23085	ENSG00000082805	chr12	0.607893	6.77014	11.1256	5.59696e-08	4.5195e-07	HomovsWT
ZNF558	148156	ENSG00000167785	chr19	-0.556844	4.21382	-7.36588	5.73206e-06	4.42268e-05	HeterovsWT		SGIP1	84251	ENSG00000118473	chr1	-2.952	-0.183397	-10.3602	1.28669e-07	9.00353e-07	HomovsWT
AL035458.2	NA	NA	chr20	0.668528	4.1475	7.36444	5.74395e-06	4.4276e-05	HeterovsWT		AFF1	4299	ENSG00000172493	chr4	0.578972	8.1998	11.2112	5.11444e-08	4.20486e-07	HomovsWT
RNF130	55819	ENSG00000113269	chr5	-0.3531	7.82612	-7.3584	5.79397e-06	4.46362e-05	HeterovsWT		AC106881.1	NA	NA	chr4	-3.48609	-0.948149	-10.637	9.46859e-08	6.959e-07	HomovsWT
IMPA2	3613	ENSG00000141401	chr18	0.489028	7.56802	7.35413	5.82965e-06	4.48857e-05	HeterovsWT		AL662844.4	NA	NA	chr6	1.57129	1.70722	10.3483	1.304e-07	9.08254e-07	HomovsWT
TSSK5P	648630	ENSG00000227473	chr8	-0.728638	3.00867	-7.35132	5.85328e-06	4.50421e-05	HeterovsWT		PIAS2	9063	ENSG00000078043	chr18	0.866666	5.91549	11.0079	6.34177e-08	5.00197e-07	HomovsWT
MS4A14	84689	ENSG00000166928	chr11	-2.14941	-0.76778	-7.34867	5.87561e-06	4.51627e-05	HeterovsWT		SLC39A10	57181	ENSG00000196950	chr2	-0.804948	7.03165	-11.1157	5.65571e-08	4.55678e-07	HomovsWT
SRRM2	23524	ENSG00000167978	chr16	0.402346	9.15393	7.34881	5.87441e-06	4.51627e-05	HeterovsWT		WDR7	23335	ENSG00000091157	chr18	0.736946	6.28962	11.0582	6.01108e-08	4.77721e-07	HomovsWT
AC006001.3	NA	NA	chr7	-0.443244	5.12179	-7.34649	5.89409e-06	4.52791e-05	HeterovsWT		MPP7	143098	ENSG00000150054	chr10	-0.915749	6.10012	-11.0131	6.30647e-08	4.98281e-07	HomovsWT
VPS4B	9525	ENSG00000119541	chr18	0.499295	6.12017	7.34335	5.92078e-06	4.54584e-05	HeterovsWT		SMC1A	8243	ENSG00000072501	chrX	-0.446529	8.61925	-11.1973	5.18975e-08	4.2539e-07	HomovsWT
DMXL2	23312	ENSG00000104093	chr15	-0.322955	8.17794	-7.34249	5.92808e-06	4.54888e-05	HeterovsWT		HLA-C	3107	ENSG00000228299	chr6	-0.585038	6.73499	-11.0889	5.81857e-08	4.66003e-07	HomovsWT
AL662844.4	NA	NA	chr6	1.15935	1.70722	7.33901	5.95784e-06	4.56913e-05	HeterovsWT		DEGS1	8560	ENSG00000143753	chr1	-0.82031	5.91544	-10.9835	6.50856e-08	5.1157e-07	HomovsWT
ZNF2	7549	ENSG00000275111	chr2	0.670946	3.18052	7.33757	5.97021e-06	4.57604e-05	HeterovsWT		SPATA24	202051	ENSG00000170469	chr5	-1.44155	2.25373	-10.3802	1.2582e-07	8.83602e-07	HomovsWT
ANKLE1	126549	ENSG00000160117	chr19	-0.595408	5.67933	-7.33555	5.98764e-06	4.58681e-05	HeterovsWT		GINS1	9837	ENSG00000101003	chr20	-0.619358	7.38213	-11.1263	5.59248e-08	4.51856e-07	HomovsWT
CDHR2	54825	ENSG00000074276	chr5	-0.664823	3.62092	-7.33499	5.9924e-06	4.58787e-05	HeterovsWT		MCM3AP	8888	ENSG00000160294	chr21	0.674158	7.02374	11.1026	5.73437e-08	4.60037e-07	HomovsWT
GOT1	2805	ENSG00000120053	chr10	-0.389615	5.39358	-7.33377	6.00299e-06	4.59339e-05	HeterovsWT		RAB7B	338382	ENSG00000276600	chr1	-1.02912	3.913	-10.6387	9.45141e-08	6.95014e-07	HomovsWT
GLUL	2752	ENSG00000135821	chr1	0.277159	9.6206	7.32869	6.0471e-06	4.62453e-05	HeterovsWT		DGKD	8527	ENSG00000280873	chr2	0.536299	8.1662	11.1609	5.39204e-08	4.38794e-07	HomovsWT
MGAT5	4249	ENSG00000152127	chr2	0.297715	8.96523	7.3278	6.05486e-06	4.62786e-05	HeterovsWT		MFSD6	54842	ENSG00000151690	chr2	-0.762772	6.51082	-11.0251	6.22647e-08	4.93395e-07	HomovsWT
CEP85	64793	ENSG00000130695	chr1	0.448354	7.11846	7.3258	6.07232e-06	4.6386e-05	HeterovsWT		ORC1	4998	ENSG00000085840	chr1	0.5794	6.87724	11.0624	5.98443e-08	4.76439e-07	HomovsWT
HIST1H2BN	NA	NA	chr6	0.698421	6.00493	7.32336	6.09369e-06	4.65231e-05	HeterovsWT		TMEM222	84065	ENSG00000186501	chr1	0.648007	5.59672	10.9015	7.10617e-08	5.5152e-07	HomovsWT
DBN1	1627	ENSG00000113758	chr5	-0.60729	4.66871	-7.32139	6.11106e-06	4.66037e-05	HeterovsWT		ALDH9A1	223	ENSG00000143149	chr1	-0.5211	7.13232	-11.0681	5.94846e-08	4.7441e-07	HomovsWT
GBF1	8729	ENSG00000107862	chr10	0.383121	7.57888	7.32138	6.11111e-06	4.66037e-05	HeterovsWT		FMNL3	91010	ENSG00000161791	chr12	0.675956	5.59009	10.9247	6.9315e-08	5.4032e-07	HomovsWT
CPNE7	27132	ENSG00000178773	chr16	0.740204	5.80739	7.3183	6.13828e-06	4.67846e-05	HeterovsWT		AOC1	26	ENSG00000002726	chr7	-4.47317	0.306057	-10.3499	1.30156e-07	9.07021e-07	HomovsWT
TOM1L2	146691	ENSG00000175662	chr17	-0.491447	4.59478	-7.31503	6.16735e-06	4.69798e-05	HeterovsWT		LINC01305	285084	ENSG00000231453	chr2	-5.45346	-0.409894	-10.6919	8.91659e-08	6.63953e-07	HomovsWT
HIST1H2BH	NA	NA	chr6	0.91301	6.68129	7.31329	6.18281e-06	4.70712e-05	HeterovsWT		SLC22A23	63027	ENSG00000137266	chr6	-1.96441	1.19746	-10.226	1.49655e-07	1.02039e-06	HomovsWT
CES3	23491	ENSG00000172828	chr16	-0.668382	3.52209	-7.31111	6.20232e-06	4.71932e-05	HeterovsWT		CCDC7	79741	ENSG00000216937	chr10	-0.672896	5.46426	-10.8803	7.26983e-08	5.62294e-07	HomovsWT
RBMX2	51634	ENSG00000134597	chrX	-0.739978	3.77736	-7.30731	6.2364e-06	4.7426e-05	HeterovsWT		C5orf66	NA	NA	chr5	-1.07909	3.38026	-10.5554	1.03579e-07	7.48882e-07	HomovsWT
FBXO22	26263	ENSG00000167196	chr15	-0.403568	5.83504	-7.30306	6.27479e-06	4.76912e-05	HeterovsWT		DNMT3A	1788	ENSG00000119772	chr2	0.6098	6.92495	11.0461	6.08899e-08	4.8363e-07	HomovsWT
FAM81A	145773	ENSG00000157470	chr15	-0.607414	5.29274	-7.30101	6.2934e-06	4.78059e-05	HeterovsWT		TBC1D25	4943	ENSG00000068354	chrX	-1.01375	3.81661	-10.5959	9.90551e-08	7.22372e-07	HomovsWT
STAG1	10274	ENSG00000118007	chr3	0.331469	6.89989	7.29517	6.3467e-06	4.81839e-05	HeterovsWT		RAPGEF1	2889	ENSG00000107263	chr9	0.654164	7.84014	11.0888	5.81904e-08	4.66003e-07	HomovsWT
RAPGEF4-AS1	91149	ENSG00000228016	chr2	-1.15552	1.18871	-7.29362	6.361e-06	4.82654e-05	HeterovsWT		LINC02610	151174	ENSG00000186235	chr2	-0.860601	4.00915	-10.6174	9.6744e-08	7.07962e-07	HomovsWT
KCNE1	3753	ENSG00000180509	chr21	-0.858721	2.61224	-7.29209	6.37504e-06	4.83449e-05	HeterovsWT		APBB1IP	54518	ENSG00000077420	chr10	0.676526	5.82	10.9118	7.02843e-08	5.46736e-07	HomovsWT
LAMTOR4	389541	ENSG00000188186	chr7	-1.05488	6.02295	-7.29023	6.39218e-06	4.84479e-05	HeterovsWT		NPC1	4864	ENSG00000141458	chr18	-0.523756	6.53768	-10.985	6.4984e-08	5.11067e-07	HomovsWT
PSMG3-AS1	114796	ENSG00000230487	chr7	0.589628	3.82133	7.28635	6.42812e-06	4.86931e-05	HeterovsWT		NKAPP1	158801	ENSG00000233382	chrX	-0.962197	2.83911	-10.4763	1.13051e-07	8.08989e-07	HomovsWT
HAL	3034	ENSG00000084110	chr12	0.834171	4.27773	7.28579	6.43341e-06	4.8706e-05	HeterovsWT		DIP2A	23181	ENSG00000160305	chr21	0.580768	6.88311	11.0133	6.30495e-08	4.98281e-07	HomovsWT
SYT12	91683	ENSG00000173227	chr11	1.17072	1.45149	7.28278	6.46142e-06	4.88908e-05	HeterovsWT		MVK	4598	ENSG00000110921	chr12	0.900981	5.59458	10.8595	7.435e-08	5.70299e-07	HomovsWT
NCAPD3	23310	ENSG00000151503	chr11	0.302579	7.62726	7.28166	6.47194e-06	4.89432e-05	HeterovsWT		ATAD5	79915	ENSG00000176208	chr17	0.600508	5.39797	10.8297	7.6774e-08	5.868e-07	HomovsWT
ELAVL4	1996	ENSG00000162374	chr1	-2.10272	0.204707	-7.27941	6.49302e-06	4.90752e-05	HeterovsWT		AC090152.1	NA	NA	chr8	2.25751	0.870174	10.1909	1.55714e-07	1.0501e-06	HomovsWT
DDX11	1663	ENSG00000013573	chr12	0.40041	6.88143	7.27571	6.52787e-06	4.93112e-05	HeterovsWT		ADORA2A-AS1	646023	ENSG00000178803	chr22	2.65781	0.364411	10.1813	1.5743e-07	1.058e-06	HomovsWT
AC013652.1	NA	NA	chr15	-1.46958	-0.610603	-7.27459	6.53845e-06	4.93116e-05	HeterovsWT		RFK	55312	ENSG00000135002	chr9	-0.884571	5.29964	-10.833	7.65052e-08	5.85075e-07	HomovsWT
APOBEC3F	200316	ENSG00000128394	chr22	0.777009	2.59796	7.27455	6.53882e-06	4.93116e-05	HeterovsWT		PDCD4	27250	ENSG00000150593	chr10	-0.970427	6.84115	-10.9707	6.59821e-08	5.17419e-07	HomovsWT
PALD1	27143	ENSG00000107719	chr10	0.532245	5.50369	7.27477	6.53682e-06	4.93116e-05	HeterovsWT		GATAD1	57798	ENSG00000157259	chr7	-0.941335	4.81667	-10.753	8.34313e-08	6.2987e-07	HomovsWT
ALG1L6P	339879	NA	chr3	-0.572071	3.93145	-7.27132	6.56955e-06	4.95159e-05	HeterovsWT		BCR	613	ENSG00000186716	chr22	0.682395	7.66694	11.0325	6.17748e-08	4.90085e-07	HomovsWT
FRG1BP	284802	NA	chr20	0.958165	1.7402	7.26891	6.59248e-06	4.96611e-05	HeterovsWT		LINC02641	105378531	ENSG00000286344	chr10	-3.43402	-0.418125	-10.233	1.48475e-07	1.01438e-06	HomovsWT
PNPLA1	285848	ENSG00000180316	chr6	-0.654162	3.20962	-7.26793	6.60187e-06	4.97043e-05	HeterovsWT		UPRT	139596	ENSG00000094841	chrX	-1.23632	4.0157	-10.6177	9.6717e-08	7.07962e-07	HomovsWT
JMY	133746	ENSG00000152409	chr5	-0.59498	4.6972	-7.26073	6.6711e-06	5.01977e-05	HeterovsWT		EXOC6	54536	ENSG00000138190	chr10	0.614858	5.97379	10.89	7.19484e-08	5.57283e-07	HomovsWT
ZNF181	339318	ENSG00000197841	chr19	-0.756789	3.26266	-7.25871	6.69063e-06	5.0289e-05	HeterovsWT		NUP35	129401	ENSG00000163002	chr2	-0.691745	5.04288	-10.7137	8.70771e-08	6.51771e-07	HomovsWT
TAF4	6874	ENSG00000130699	chr20	0.382749	6.55866	7.25909	6.68697e-06	5.0289e-05	HeterovsWT		HUWE1	10075	ENSG00000086758	chrX	-0.509746	9.80602	-11.0868	5.8314e-08	4.66718e-07	HomovsWT
UBE2Q2P2	100134869	ENSG00000259429	chr15	-0.499078	4.44754	-7.25247	6.75148e-06	5.07183e-05	HeterovsWT		CDK19	23097	ENSG00000155111	chr6	0.693353	6.47723	10.9123	7.02466e-08	5.46736e-07	HomovsWT
HJURP	55355	ENSG00000123485	chr2	0.497213	6.5673	7.25179	6.7581e-06	5.07399e-05	HeterovsWT		MSMO1	6307	ENSG00000052802	chr4	0.596759	6.52593	10.9245	6.93276e-08	5.4032e-07	HomovsWT
MYH9	4627	ENSG00000100345	chr22	0.374961	9.85946	7.25008	6.77494e-06	5.08382e-05	HeterovsWT		AL356599.1	NA	NA	chr6	-1.35313	3.23539	-10.4014	1.22883e-07	8.67912e-07	HomovsWT
MROH8	140699	ENSG00000101353	chr20	0.91135	2.10976	7.24906	6.7849e-06	5.08849e-05	HeterovsWT		ACVR2B	93	ENSG00000114739	chr3	0.551162	7.18999	10.9734	6.57968e-08	5.16263e-07	HomovsWT
CCDC12	151903	ENSG00000160799	chr3	0.450998	5.96568	7.24746	6.80073e-06	5.09755e-05	HeterovsWT		FLT3	2322	ENSG00000122025	chr13	1.65789	2.4187	10.1487	1.63373e-07	1.09469e-06	HomovsWT
GLIS1	148979	ENSG00000174332	chr1	1.02941	1.38021	7.24446	6.83032e-06	5.11074e-05	HeterovsWT		PPP1R9B	84687	ENSG00000108819	chr17	0.792343	7.20327	10.9691	6.60974e-08	5.17516e-07	HomovsWT
NRM	11270	ENSG00000206484	chr6	0.692775	5.44541	7.24403	6.83463e-06	5.11074e-05	HeterovsWT		AADACL2-AS1	101928142	NA	chr3	1.61763	1.40148	10.1784	1.57943e-07	1.0604e-06	HomovsWT
TAB1	10454	ENSG00000100324	chr22	0.577983	6.03265	7.24404	6.8345e-06	5.11074e-05	HeterovsWT		MAPK6	5597	ENSG00000069956	chr15	-0.617374	6.12188	-10.8687	7.36174e-08	5.67388e-07	HomovsWT
HIF1AN	55662	ENSG00000166135	chr10	0.395647	7.09485	7.24388	6.83612e-06	5.11074e-05	HeterovsWT		TBC1D20	128637	ENSG00000125875	chr20	-0.510665	6.98946	-10.9511	6.73838e-08	5.26586e-07	HomovsWT
SEMA4D	10507	ENSG00000187764	chr9	0.356457	7.72435	7.24378	6.83715e-06	5.11074e-05	HeterovsWT		ERI1	90459	ENSG00000104626	chr8	0.577869	7.10674	10.9629	6.65353e-08	5.20255e-07	HomovsWT
ARHGAP45	23526	ENSG00000180448	chr19	-0.56343	8.4445	-7.23883	6.88641e-06	5.14473e-05	HeterovsWT		TACC3	10460	ENSG00000013810	chr4	0.828087	8.22648	11.0122	6.31252e-08	4.98469e-07	HomovsWT
MPHOSPH9	10198	ENSG00000051825	chr12	0.427892	6.91626	7.23591	6.91565e-06	5.16374e-05	HeterovsWT		LRRC25	126364	ENSG00000175489	chr19	1.62702	1.49664	10.1737	1.58796e-07	1.0656e-06	HomovsWT
CCDC130	NA	NA	chr19	-0.491682	4.61325	-7.23256	6.9494e-06	5.18608e-05	HeterovsWT		DLD	1738	ENSG00000091140	chr7	0.52592	7.47863	10.9689	6.61089e-08	5.17516e-07	HomovsWT
SMPD5	392275	NA	chr8	-1.32811	2.19037	-7.2321	6.95412e-06	5.18676e-05	HeterovsWT		RBMX2	51634	ENSG00000134597	chrX	-1.13054	3.77736	-10.5047	1.09541e-07	7.87608e-07	HomovsWT
BLCAP	10904	ENSG00000166619	chr20	-0.36785	6.42528	-7.22998	6.97551e-06	5.19986e-05	HeterovsWT		LINC02218	102723526	ENSG00000249662	chr5	-1.58152	2.06645	-10.2876	1.39591e-07	9.61747e-07	HomovsWT
CHD5	26038	ENSG00000116254	chr1	1.53593	0.562302	7.22951	6.98025e-06	5.20054e-05	HeterovsWT		ADGRA3	166647	ENSG00000152990	chr4	-0.551895	6.15261	-10.8264	7.70506e-08	5.88584e-07	HomovsWT
LMO2	4005	ENSG00000135363	chr11	-0.363666	7.00031	-7.22898	6.98568e-06	5.20173e-05	HeterovsWT		SP4	6671	ENSG00000105866	chr7	0.904673	5.72278	10.7912	8.00404e-08	6.09024e-07	HomovsWT
PBXIP1	57326	ENSG00000163346	chr1	0.592681	5.28763	7.22831	6.99245e-06	5.20391e-05	HeterovsWT		ZFP1	162239	ENSG00000184517	chr16	0.82071	4.55104	10.6183	9.66536e-08	7.07962e-07	HomovsWT
DGKZ	8525	ENSG00000149091	chr11	0.531103	8.56568	7.22454	7.0309e-06	5.22966e-05	HeterovsWT		FAM136A	84908	ENSG00000035141	chr2	0.702763	6.33089	10.8679	7.36807e-08	5.67388e-07	HomovsWT
TAB3	257397	ENSG00000157625	chrX	-0.538423	5.31044	-7.22379	7.03856e-06	5.23249e-05	HeterovsWT		TOP3A	7156	ENSG00000177302	chr17	0.539408	6.93292	10.9096	7.04474e-08	5.47378e-07	HomovsWT
DTD1	92675	ENSG00000125821	chr20	-0.654182	4.29378	-7.22247	7.05215e-06	5.23974e-05	HeterovsWT		ZNF77	58492	ENSG00000175691	chr19	-3.14792	-1.11212	-10.135	1.6593e-07	1.10858e-06	HomovsWT
PRICKLE3	4007	ENSG00000012211	chrX	-0.593623	3.62363	-7.22171	7.05994e-06	5.24265e-05	HeterovsWT		HSBP1	3281	ENSG00000230989	chr16	0.701682	6.52749	10.8752	7.30992e-08	5.64751e-07	HomovsWT
NETO2	81831	ENSG00000171208	chr16	0.518117	4.99065	7.21847	7.09322e-06	5.26161e-05	HeterovsWT		APLF	200558	ENSG00000169621	chr2	-0.910106	4.65156	-10.6285	9.55734e-08	7.01285e-07	HomovsWT
AGO2	27161	ENSG00000123908	chr8	-0.335003	7.99752	-7.21851	7.09283e-06	5.26161e-05	HeterovsWT		TMEM230	29058	ENSG00000089063	chr20	-0.536293	7.1325	-10.9186	6.97714e-08	5.43369e-07	HomovsWT
IRX3	79191	ENSG00000177508	chr16	0.520191	5.87406	7.21612	7.11753e-06	5.27676e-05	HeterovsWT		IMP3	55272	ENSG00000177971	chr15	-0.758547	5.00206	-10.6702	9.13054e-08	6.76178e-07	HomovsWT
AC008537.1	NA	NA	chr19	-1.17799	3.1371	-7.21437	7.13568e-06	5.28733e-05	HeterovsWT		MASTL	84930	ENSG00000120539	chr10	0.774913	5.61268	10.7432	8.43284e-08	6.3419e-07	HomovsWT
RPL34-AS1	NA	NA	chr4	0.815059	3.53295	7.2118	7.16245e-06	5.30427e-05	HeterovsWT		PHACTR2	9749	ENSG00000112419	chr6	-0.698677	5.65701	-10.7494	8.37578e-08	6.31298e-07	HomovsWT
TMEM94	9772	ENSG00000177728	chr17	0.47827	6.20715	7.21096	7.17124e-06	5.30789e-05	HeterovsWT		AC096887.1	NA	NA	chr3	-0.863406	4.91789	-10.6255	9.58912e-08	7.03237e-07	HomovsWT
PRRC2A	7916	ENSG00000225164	chr6	0.347719	9.71302	7.21004	7.18079e-06	5.31206e-05	HeterovsWT		MYL5	4636	ENSG00000215375	chr4	-0.800914	4.63485	-10.5791	1.00908e-07	7.33688e-07	HomovsWT
EPHB6	2051	ENSG00000106123	chr7	0.728229	4.90669	7.20965	7.18489e-06	5.31221e-05	HeterovsWT		ZC3H12B	340554	ENSG00000102053	chrX	-1.76901	2.21901	-10.1825	1.5721e-07	1.05756e-06	HomovsWT
CERK	64781	ENSG00000100422	chr22	0.441404	5.7595	7.20914	7.19026e-06	5.31328e-05	HeterovsWT		PSTPIP1	9051	ENSG00000140368	chr15	-0.689652	6.93904	-10.8673	7.37224e-08	5.67388e-07	HomovsWT
PLSCR1	5359	ENSG00000188313	chr3	0.54707	4.41709	7.20635	7.21954e-06	5.33202e-05	HeterovsWT		AL050403.2	NA	NA	chr20	-3.64416	-0.488891	-10.2197	1.50715e-07	1.02453e-06	HomovsWT
CKAP5	9793	ENSG00000175216	chr11	0.288512	8.54216	7.20458	7.23816e-06	5.34286e-05	HeterovsWT		LRRC45	201255	ENSG00000169683	chr17	1.13624	5.14957	10.6455	9.381e-08	6.91516e-07	HomovsWT
DNM2	1785	ENSG00000079805	chr19	-0.351736	8.18352	-7.19999	7.28666e-06	5.37574e-05	HeterovsWT		TYW3	127253	ENSG00000162623	chr1	0.78636	5.93857	10.7546	8.3289e-08	6.29431e-07	HomovsWT
AFF4	27125	ENSG00000072364	chr5	-0.423183	5.66132	-7.19709	7.31757e-06	5.39537e-05	HeterovsWT		PKMYT1	9088	ENSG00000127564	chr16	0.898303	6.75459	10.8416	7.58008e-08	5.80194e-07	HomovsWT
KLF6	1316	ENSG00000067082	chr10	0.382681	6.42815	7.19675	7.32121e-06	5.39537e-05	HeterovsWT		CLEC16A	23274	ENSG00000038532	chr16	0.53842	6.725	10.8413	7.58242e-08	5.80194e-07	HomovsWT
WASHC3	51019	ENSG00000120860	chr12	-0.842892	3.22211	-7.19531	7.33652e-06	5.40372e-05	HeterovsWT		P2RX1	5023	ENSG00000108405	chr17	-0.630041	6.04741	-10.7651	8.23434e-08	6.23404e-07	HomovsWT
BTBD2	55643	ENSG00000133243	chr19	-0.420654	7.05839	-7.19264	7.36518e-06	5.42189e-05	HeterovsWT		PURB	5814	ENSG00000146676	chr7	0.581685	6.94116	10.8591	7.43821e-08	5.70299e-07	HomovsWT
CACNB4	785	ENSG00000182389	chr2	0.514852	4.81444	7.19185	7.37363e-06	5.42517e-05	HeterovsWT		RAB11A	8766	ENSG00000103769	chr15	-0.605972	7.16553	-10.8676	7.37e-08	5.67388e-07	HomovsWT
SLC22A15	55356	ENSG00000163393	chr1	-0.38208	6.51536	-7.19025	7.39088e-06	5.43492e-05	HeterovsWT		AL109809.5	NA	NA	chr20	-1.1567	3.03649	-10.2975	1.38052e-07	9.52752e-07	HomovsWT
RNF40	9810	ENSG00000103549	chr16	0.515838	7.02679	7.18813	7.41381e-06	5.44883e-05	HeterovsWT		STK10	6793	ENSG00000072786	chr5	0.533913	7.91139	10.9112	7.03256e-08	5.46745e-07	HomovsWT
NDUFS4	4724	ENSG00000164258	chr5	-0.390113	5.85772	-7.18232	7.47692e-06	5.49224e-05	HeterovsWT		PRKCD	5580	ENSG00000163932	chr3	0.56052	7.36459	10.8759	7.30433e-08	5.64641e-07	HomovsWT
SNHG17	388796	ENSG00000196756	chr20	-0.521271	7.17291	-7.18166	7.48408e-06	5.49453e-05	HeterovsWT		TMEM243	79161	ENSG00000135185	chr7	-0.762206	4.51886	-10.5674	1.02218e-07	7.41628e-07	HomovsWT
MFNG	4242	ENSG00000100060	chr22	-0.532314	7.73592	-7.17382	7.57029e-06	5.55482e-05	HeterovsWT		PGM5	5239	ENSG00000154330	chr9	-4.12752	-0.555677	-10.1901	1.55855e-07	1.05054e-06	HomovsWT
ARHGAP42	143872	ENSG00000165895	chr11	2.19022	1.35624	7.17294	7.57997e-06	5.55892e-05	HeterovsWT		TMLHE	55217	ENSG00000185973	chrX	-2.22343	0.681959	-10.003	1.93018e-07	1.25795e-06	HomovsWT
DUSP5	1847	ENSG00000138166	chr10	-0.527009	4.70949	-7.17009	7.61161e-06	5.57309e-05	HeterovsWT		OSBPL3	26031	ENSG00000070882	chr7	0.588436	7.07941	10.8588	7.44051e-08	5.70299e-07	HomovsWT
ZFP90	146198	ENSG00000184939	chr16	0.567238	5.04953	7.17057	7.60633e-06	5.57309e-05	HeterovsWT		FABP3	2170	ENSG00000121769	chr1	1.14521	3.18242	10.3171	1.35043e-07	9.37708e-07	HomovsWT
PTGES3	10728	ENSG00000110958	chr12	0.328443	8.85315	7.17023	7.6101e-06	5.57309e-05	HeterovsWT		GPANK1	7918	ENSG00000232312	chr6	0.965007	4.56208	10.5211	1.07572e-07	7.75092e-07	HomovsWT
GMDS	2762	ENSG00000112699	chr6	-0.355613	6.57772	-7.16667	7.64976e-06	5.59801e-05	HeterovsWT		INPP4A	3631	ENSG00000040933	chr2	0.495222	7.67693	10.8679	7.36816e-08	5.67388e-07	HomovsWT
RPS27L	51065	ENSG00000185088	chr15	-0.68819	4.65888	-7.16325	7.68806e-06	5.62301e-05	HeterovsWT		GLCE	26035	ENSG00000138604	chr15	-0.976808	4.1624	-10.4879	1.1161e-07	8.00783e-07	HomovsWT
POGZ	23126	ENSG00000143442	chr1	0.353555	7.35594	7.15753	7.75272e-06	5.66724e-05	HeterovsWT		CDCA7L	55536	ENSG00000164649	chr7	0.598168	7.60743	10.8624	7.41195e-08	5.69183e-07	HomovsWT
PDE4D	5144	ENSG00000113448	chr5	-0.529413	8.29293	-7.15055	7.83229e-06	5.72233e-05	HeterovsWT		LRWD1	222229	ENSG00000161036	chr7	0.795884	4.94932	10.5746	1.01413e-07	7.36573e-07	HomovsWT
TRGJP1	6971	ENSG00000211692	chr7	-2.07133	-0.946416	-7.14686	7.87465e-06	5.75019e-05	HeterovsWT		SNAI3-AS1	197187	ENSG00000260630	chr16	0.999106	3.59828	10.3391	1.31742e-07	9.16661e-07	HomovsWT
GATAD2B	57459	ENSG00000261992	chr1	0.344234	7.41618	7.14528	7.8929e-06	5.76042e-05	HeterovsWT		TNIK	23043	ENSG00000154310	chr3	-0.68051	6.66915	-10.777	8.12888e-08	6.16451e-07	HomovsWT
SMYD4	114826	ENSG00000186532	chr17	0.513732	4.78828	7.14402	7.90744e-06	5.76174e-05	HeterovsWT		GALE	2582	ENSG00000117308	chr1	0.687214	6.15075	10.7259	8.59297e-08	6.44093e-07	HomovsWT
ZBTB18	10472	ENSG00000179456	chr1	0.455283	5.5568	7.14447	7.9023e-06	5.76174e-05	HeterovsWT		TRAF2	7186	ENSG00000127191	chr9	0.891731	5.85602	10.677	9.06301e-08	6.71572e-07	HomovsWT
SETDB2	83852	ENSG00000136169	chr13	-0.346322	8.40288	-7.14437	7.90337e-06	5.76174e-05	HeterovsWT		DGAT2	84649	ENSG00000062282	chr11	-0.714935	5.05837	-10.5612	1.02915e-07	7.45334e-07	HomovsWT
PIM2	11040	ENSG00000102096	chrX	-0.497204	4.39129	-7.1433	7.91586e-06	5.76478e-05	HeterovsWT		PPP5C	5536	ENSG00000011485	chr19	0.579985	7.06251	10.8022	7.90982e-08	6.02869e-07	HomovsWT
ACTN4	81	ENSG00000282844	chr19	0.311856	8.95363	7.14197	7.93125e-06	5.7729e-05	HeterovsWT		AURKB	9212	ENSG00000178999	chr17	0.614385	6.28838	10.7078	8.76419e-08	6.54759e-07	HomovsWT
PGD	5226	ENSG00000142657	chr1	0.343846	8.30027	7.14127	7.93938e-06	5.77572e-05	HeterovsWT		C22orf34	NA	NA	chr22	-0.535793	6.80772	-10.7582	8.29595e-08	6.27719e-07	HomovsWT
SNX10	29887	ENSG00000086300	chr7	0.651341	5.28245	7.14014	7.95252e-06	5.78191e-05	HeterovsWT		LARP4B	23185	ENSG00000107929	chr10	0.442158	8.12899	10.8452	7.55067e-08	5.78416e-07	HomovsWT
SS18L1	26039	ENSG00000184402	chr20	0.381222	6.45746	7.13981	7.95641e-06	5.78191e-05	HeterovsWT		DLG3	1741	ENSG00000082458	chrX	-4.50606	-0.993067	-10.3641	1.28108e-07	8.97812e-07	HomovsWT
EXTL3	2137	ENSG00000012232	chr8	-0.425037	6.57511	-7.13687	7.99069e-06	5.80372e-05	HeterovsWT		MRPL18	29074	ENSG00000112110	chr6	-0.620035	6.07686	-10.6664	9.16927e-08	6.78325e-07	HomovsWT
KANSL1	284058	ENSG00000275867	chr17	0.310499	7.66464	7.1335	8.03023e-06	5.82932e-05	HeterovsWT		WT1	7490	ENSG00000184937	chr11	-3.73764	-0.229393	-10.1806	1.57553e-07	1.0583e-06	HomovsWT
AGO4	192670	ENSG00000134698	chr1	0.3241	6.76535	7.13252	8.04188e-06	5.83466e-05	HeterovsWT		PPOX	5498	ENSG00000143224	chr1	-0.859342	4.25264	-10.3998	1.23093e-07	8.68918e-07	HomovsWT
SCD5	79966	ENSG00000145284	chr4	0.392033	6.02395	7.1293	8.07984e-06	5.85732e-05	HeterovsWT		GALNT8	26290	ENSG00000130035	chr12	-4.33754	-1.74519	-10.2131	1.51856e-07	1.02971e-06	HomovsWT
MAT2B	27430	ENSG00000038274	chr5	-0.427426	6.18837	-7.12914	8.08174e-06	5.85732e-05	HeterovsWT		CBFA2T3	863	ENSG00000129993	chr16	0.681374	6.80526	10.7433	8.43134e-08	6.3419e-07	HomovsWT
AC005342.2	NA	NA	chr12	-1.07278	1.27115	-7.12416	8.14103e-06	5.886e-05	HeterovsWT		PDE6G	5148	ENSG00000185527	chr17	-2.78835	0.942627	-9.91063	2.14765e-07	1.37247e-06	HomovsWT
DRP2	1821	ENSG00000102385	chrX	-0.909345	2.24358	-7.124	8.14298e-06	5.886e-05	HeterovsWT		AC096677.1	NA	NA	chr1	-0.888748	4.80252	-10.4939	1.10871e-07	7.95904e-07	HomovsWT
ZNF384	171017	ENSG00000126746	chr12	0.531261	4.4449	7.12531	8.12735e-06	5.886e-05	HeterovsWT		STK40	83931	ENSG00000196182	chr1	0.682715	6.57233	10.7259	8.59283e-08	6.44093e-07	HomovsWT
CAST	831	ENSG00000153113	chr5	-0.648621	4.31294	-7.12458	8.13595e-06	5.886e-05	HeterovsWT		EFL1	79631	ENSG00000140598	chr15	-0.702207	6.16429	-10.6663	9.16952e-08	6.78325e-07	HomovsWT
EIF2AK2	5610	ENSG00000055332	chr2	-0.374865	6.94164	-7.12439	8.13822e-06	5.886e-05	HeterovsWT		PTGER2	5732	ENSG00000125384	chr14	-0.744511	5.41761	-10.573	1.01584e-07	7.37421e-07	HomovsWT
CRYZ	1429	ENSG00000116791	chr1	0.58212	4.05153	7.12347	8.14924e-06	5.88739e-05	HeterovsWT		HIST1H2AG	NA	NA	chr6	0.967341	9.52622	10.8622	7.41338e-08	5.69183e-07	HomovsWT
GYPC	2995	ENSG00000136732	chr2	-0.43298	6.24455	-7.12053	8.18446e-06	5.9097e-05	HeterovsWT		WSB1	26118	ENSG00000109046	chr17	0.481375	6.58763	10.7045	8.79572e-08	6.56754e-07	HomovsWT
TMEM161B-AS1	NA	NA	chr5	-0.414323	5.67633	-7.115	8.25118e-06	5.95471e-05	HeterovsWT		MAP4K4	9448	ENSG00000071054	chr2	0.509225	8.01584	10.7898	8.01611e-08	6.09426e-07	HomovsWT
ZC3H4	23211	ENSG00000130749	chr19	0.369336	7.59657	7.11295	8.27605e-06	5.96948e-05	HeterovsWT		KIF24	347240	ENSG00000186638	chr9	0.775184	4.99254	10.5029	1.0977e-07	7.88832e-07	HomovsWT
NR2F2	7026	ENSG00000185551	chr15	-0.610585	3.56732	-7.11061	8.30454e-06	5.98685e-05	HeterovsWT		TTF2	8458	ENSG00000116830	chr1	0.504979	7.58023	10.7802	8.10006e-08	6.14609e-07	HomovsWT
CDC42BPB	9578	ENSG00000198752	chr14	0.582964	4.06888	7.10869	8.328e-06	6.00058e-05	HeterovsWT		PDGFB	5155	ENSG00000100311	chr22	-4.79664	-0.772052	-10.1857	1.56639e-07	1.05477e-06	HomovsWT
AC141557.1	NA	NA	chr12	-0.485632	4.96113	-7.10622	8.35824e-06	6.01918e-05	HeterovsWT		CTSV	1515	ENSG00000136943	chr9	3.92011	0.296279	10.1022	1.72264e-07	1.14238e-06	HomovsWT
MTHFSD	64779	ENSG00000103248	chr16	0.41251	6.047	7.10434	8.38138e-06	6.03211e-05	HeterovsWT		PLA2G4A	5321	ENSG00000116711	chr1	-0.635862	6.50322	-10.6817	9.01716e-08	6.69241e-07	HomovsWT
HLA-C	3107	ENSG00000228299	chr6	-0.369692	6.73499	-7.10404	8.38509e-06	6.03211e-05	HeterovsWT		GNB2	2783	ENSG00000172354	chr7	-0.591839	8.53121	-10.8193	7.76488e-08	5.92487e-07	HomovsWT
AC138393.1	NA	NA	chr1	-0.461188	4.10552	-7.10275	8.40102e-06	6.04037e-05	HeterovsWT		DCAF12	25853	ENSG00000198876	chr9	0.619243	6.4091	10.6636	9.1969e-08	6.7961e-07	HomovsWT
MCCC1	56922	ENSG00000078070	chr3	0.363793	6.28534	7.10189	8.4116e-06	6.04158e-05	HeterovsWT		SLC35C2	51006	ENSG00000080189	chr20	-0.518867	6.97257	-10.7093	8.74916e-08	6.53996e-07	HomovsWT
NEIL3	55247	ENSG00000109674	chr4	0.380889	6.48774	7.10199	8.41035e-06	6.04158e-05	HeterovsWT		SHC4	399694	ENSG00000185634	chr15	-1.96369	1.16778	-9.89417	2.18908e-07	1.39456e-06	HomovsWT
OXR1	55074	ENSG00000164830	chr8	1.30855	0.720512	7.09869	8.45134e-06	6.06238e-05	HeterovsWT		ARAP1	116985	ENSG00000186635	chr11	0.809684	7.15166	10.7322	8.53356e-08	6.40347e-07	HomovsWT
TMEM60	85025	ENSG00000135211	chr7	-0.581584	4.72302	-7.09855	8.45299e-06	6.06238e-05	HeterovsWT		NFKBID	84807	ENSG00000167604	chr19	0.997496	4.44785	10.4237	1.19856e-07	8.50067e-07	HomovsWT
ZNF687	57592	ENSG00000143373	chr1	0.453655	5.95316	7.09848	8.45395e-06	6.06238e-05	HeterovsWT		BUB1	699	ENSG00000169679	chr2	-0.534077	7.71121	-10.7516	8.35595e-08	6.30153e-07	HomovsWT
CLASRP	11129	ENSG00000104859	chr19	0.412597	6.44084	7.09783	8.46193e-06	6.0649e-05	HeterovsWT		KMT2D	8085	ENSG00000167548	chr12	0.567097	8.31998	10.7891	8.02278e-08	6.09426e-07	HomovsWT
CEP72	55722	ENSG00000112877	chr5	0.459131	6.01759	7.0974	8.46732e-06	6.06557e-05	HeterovsWT		AMBRA1	55626	ENSG00000110497	chr11	0.511894	6.26375	10.6482	9.3536e-08	6.90438e-07	HomovsWT
PACSIN3	29763	ENSG00000165912	chr11	0.62568	4.95233	7.09549	8.49115e-06	6.07943e-05	HeterovsWT		CWC22	57703	ENSG00000163510	chr2	-0.843257	6.11332	-10.5991	9.87082e-08	7.20603e-07	HomovsWT
MAU2	23383	ENSG00000129933	chr19	-0.380639	6.55384	-7.09377	8.5126e-06	6.09158e-05	HeterovsWT		HPRT1	3251	ENSG00000165704	chrX	-0.581204	6.85508	-10.7016	8.82288e-08	6.58058e-07	HomovsWT
CC2D2A	57545	ENSG00000048342	chr4	-0.680661	4.05172	-7.08937	8.56788e-06	6.12791e-05	HeterovsWT		OFD1	8481	ENSG00000046651	chrX	-1.05475	4.99303	-10.4293	1.19116e-07	8.45704e-07	HomovsWT
LRMDA	83938	ENSG00000148655	chr10	-0.297084	9.41184	-7.08835	8.58079e-06	6.13391e-05	HeterovsWT		MS4A14	84689	ENSG00000166928	chr11	-4.13118	-0.76778	-10.0347	1.86116e-07	1.21999e-06	HomovsWT
SPPL3	121665	ENSG00000157837	chr12	0.389164	6.44006	7.08733	8.59375e-06	6.13994e-05	HeterovsWT		TMEM99	NA	NA	chr17	-1.32704	2.46407	-10.0272	1.87715e-07	1.2287e-06	HomovsWT
CYB561	1534	ENSG00000008283	chr17	1.99867	0.489297	7.08555	8.61623e-06	6.14954e-05	HeterovsWT		CRNKL1	51340	ENSG00000101343	chr20	-0.722951	5.67458	-10.5576	1.03331e-07	7.47703e-07	HomovsWT
CAB39	51719	ENSG00000135932	chr2	-0.374944	7.68724	-7.08558	8.61587e-06	6.14954e-05	HeterovsWT		RELL1	768211	ENSG00000181826	chr4	0.666003	4.67256	10.4316	1.18816e-07	8.44207e-07	HomovsWT
PLXNC1	10154	ENSG00000136040	chr12	-0.386083	6.86835	-7.08135	8.66964e-06	6.1844e-05	HeterovsWT		SUPT3H	8464	ENSG00000196284	chr6	-0.752989	5.71732	-10.561	1.02944e-07	7.45334e-07	HomovsWT
C9orf64	84267	ENSG00000165118	chr9	-0.534938	4.47714	-7.08025	8.68376e-06	6.19122e-05	HeterovsWT		CDC45	8318	ENSG00000093009	chr22	0.585324	6.40505	10.6333	9.50739e-08	6.98374e-07	HomovsWT
MASTL	84930	ENSG00000120539	chr10	0.5195	5.61268	7.07909	8.6986e-06	6.19855e-05	HeterovsWT		BCL9L	283149	ENSG00000186174	chr11	0.790737	4.53761	10.393	1.24041e-07	8.73366e-07	HomovsWT
B4GALT5	9334	ENSG00000158470	chr20	0.324237	7.93176	7.07511	8.7497e-06	6.23169e-05	HeterovsWT		OTULINL	54491	ENSG00000145569	chr5	-0.531742	6.38134	-10.6154	9.69589e-08	7.09152e-07	HomovsWT
CBX2	84733	ENSG00000173894	chr17	0.456312	6.6656	7.07222	8.78701e-06	6.25499e-05	HeterovsWT		MAST2	23139	ENSG00000086015	chr1	0.490528	7.00693	10.6903	8.93296e-08	6.64808e-07	HomovsWT
ZNF385D	79750	ENSG00000151789	chr3	-2.93362	-1.60982	-7.06897	8.82927e-06	6.26793e-05	HeterovsWT		DHX32	55760	ENSG00000089876	chr10	-0.860508	3.59231	-10.2214	1.50433e-07	1.02312e-06	HomovsWT
EMP1	2012	ENSG00000134531	chr12	-4.07507	1.12827	-7.06889	8.83023e-06	6.26793e-05	HeterovsWT		RABEPK	10244	ENSG00000136933	chr9	-0.707972	4.70263	-10.3946	1.23815e-07	8.72645e-07	HomovsWT
ROPN1L	83853	ENSG00000145491	chr5	-1.07869	1.65096	-7.06952	8.82214e-06	6.26793e-05	HeterovsWT		RPL18A	6142	ENSG00000105640	chr19	-0.530858	9.34489	-10.783	8.07536e-08	6.13077e-07	HomovsWT
NFE2L3	9603	ENSG00000050344	chr7	1.04272	3.14358	7.06869	8.83287e-06	6.26793e-05	HeterovsWT		DGCR8	54487	ENSG00000128191	chr22	0.553756	6.29975	10.604	9.81828e-08	7.17331e-07	HomovsWT
CPNE5	57699	ENSG00000124772	chr6	-0.714732	2.92752	-7.06991	8.81701e-06	6.26793e-05	HeterovsWT		HIST1H1C	NA	NA	chr6	0.981801	9.74572	10.7892	8.02212e-08	6.09426e-07	HomovsWT
PFKP	5214	ENSG00000067057	chr10	0.391883	8.09145	7.06927	8.8254e-06	6.26793e-05	HeterovsWT		KIAA0355	NA	NA	chr19	0.999636	3.56927	10.1971	1.54628e-07	1.04486e-06	HomovsWT
DACT3	147906	ENSG00000197380	chr19	-1.54902	0.5624	-7.06737	8.85007e-06	6.2703e-05	HeterovsWT		KRT2	3849	ENSG00000172867	chr12	-5.39599	-1.60694	-10.2253	1.49776e-07	1.0207e-06	HomovsWT
TLCD3B	83723	ENSG00000149926	chr16	0.928938	2.46169	7.06749	8.84856e-06	6.2703e-05	HeterovsWT		CDK2AP1	8099	ENSG00000111328	chr12	0.711232	4.89734	10.4021	1.22785e-07	8.67674e-07	HomovsWT
GDAP1	54332	ENSG00000104381	chr8	-0.719479	2.23775	-7.06768	8.84607e-06	6.2703e-05	HeterovsWT		EPB41	2035	ENSG00000159023	chr1	0.685466	7.94067	10.7218	8.63079e-08	6.46571e-07	HomovsWT
PIGG	54872	ENSG00000174227	chr4	0.440509	6.7164	7.06513	8.87936e-06	6.28777e-05	HeterovsWT		NCAPD3	23310	ENSG00000151503	chr11	0.442972	7.62726	10.7028	8.81152e-08	6.57572e-07	HomovsWT
TMOD3	29766	ENSG00000138594	chr15	-0.329707	7.34754	-7.06323	8.90424e-06	6.3021e-05	HeterovsWT		NEMP2	100131211	ENSG00000189362	chr2	-0.716266	5.00546	-10.4061	1.22238e-07	8.64704e-07	HomovsWT
LINC01623	401242	ENSG00000225595	chr6	1.55685	0.258711	7.06038	8.94178e-06	6.32538e-05	HeterovsWT		CREBBP	1387	ENSG00000005339	chr16	0.5744	6.91623	10.6518	9.31676e-08	6.88093e-07	HomovsWT
NECAB2	54550	ENSG00000103154	chr16	-1.52868	0.389241	-7.05849	8.96672e-06	6.33972e-05	HeterovsWT		ZNF815P	401303	NA	chr7	1.0972	3.69788	10.2372	1.47771e-07	1.01059e-06	HomovsWT
KCNE1B	NA	NA	chr21	-1.84267	-0.125534	-7.05706	8.98567e-06	6.34321e-05	HeterovsWT		JRK	8629	ENSG00000234616	chr8	0.842631	6.89519	10.644	9.39612e-08	6.92072e-07	HomovsWT
ZNF721	170960	ENSG00000182903	chr4	0.552897	4.35479	7.05727	8.98296e-06	6.34321e-05	HeterovsWT		B3GNT2	10678	ENSG00000170340	chr2	0.523103	6.90007	10.6453	9.38348e-08	6.91516e-07	HomovsWT
WDR59	79726	ENSG00000103091	chr16	0.440689	5.8815	7.0572	8.98389e-06	6.34321e-05	HeterovsWT		SAE1	10055	ENSG00000142230	chr19	0.530631	8.5566	10.7135	8.7098e-08	6.51771e-07	HomovsWT
CRY1	1407	ENSG00000008405	chr12	-0.448115	4.84645	-7.05581	9.00231e-06	6.35165e-05	HeterovsWT		ICK	NA	NA	chr6	-0.942257	4.38365	-10.293	1.38749e-07	9.56592e-07	HomovsWT
CD47	961	ENSG00000196776	chr3	-0.379027	8.27434	-7.04754	9.11288e-06	6.42633e-05	HeterovsWT		DHRS13	147015	ENSG00000167536	chr17	1.06503	2.88801	10.0671	1.79317e-07	1.18342e-06	HomovsWT
STK36	27148	ENSG00000163482	chr2	0.492907	4.41903	7.04632	9.12937e-06	6.42795e-05	HeterovsWT		TRGJP1	6971	ENSG00000211692	chr7	-4.19153	-0.946416	-10.0111	1.91241e-07	1.24775e-06	HomovsWT
MICAL1	64780	ENSG00000135596	chr6	-0.403975	4.87626	-7.04657	9.12587e-06	6.42795e-05	HeterovsWT		YEATS2	55689	ENSG00000163872	chr3	0.53343	6.81237	10.5952	9.91388e-08	7.22373e-07	HomovsWT
ADA	100	ENSG00000196839	chr20	0.408417	6.26015	7.04639	9.12836e-06	6.42795e-05	HeterovsWT		SERPINB6	5269	ENSG00000124570	chr6	-0.549098	6.37447	-10.5552	1.03604e-07	7.48882e-07	HomovsWT
TMEM187	8269	ENSG00000177854	chrX	-0.913792	3.30956	-7.04515	9.14511e-06	6.4357e-05	HeterovsWT		PLPBP	11212	ENSG00000147471	chr8	0.591348	6.77216	10.5989	9.87367e-08	7.20603e-07	HomovsWT
GUSBP2	387036	ENSG00000241549	chr6	0.698131	3.35222	7.04368	9.16494e-06	6.44631e-05	HeterovsWT		FRRS1	391059	ENSG00000156869	chr1	-0.95585	3.68496	-10.1236	1.68109e-07	1.12089e-06	HomovsWT
PCDH12	51294	ENSG00000113555	chr5	-0.718198	4.37669	-7.04238	9.18264e-06	6.45542e-05	HeterovsWT		SMAD6	4091	ENSG00000137834	chr15	-0.759968	5.7729	-10.4707	1.13758e-07	8.13617e-07	HomovsWT
PRR5L	79899	ENSG00000135362	chr11	0.619472	4.4164	7.037	9.25583e-06	6.5035e-05	HeterovsWT		PLXNB3	5365	ENSG00000198753	chrX	-1.47986	1.40344	-9.81299	2.4062e-07	1.51371e-06	HomovsWT
TMEM198B	440104	ENSG00000182796	chr12	-0.694098	3.05953	-7.03621	9.2667e-06	6.50777e-05	HeterovsWT		MPC2	25874	ENSG00000143158	chr1	-1.18792	4.70486	-10.3003	1.37622e-07	9.51236e-07	HomovsWT
IKBKG	8517	ENSG00000269335	chrX	-0.70794	3.99025	-7.03434	9.29241e-06	6.51909e-05	HeterovsWT		BNIP2	663	ENSG00000140299	chr15	-0.738138	5.82102	-10.4582	1.15346e-07	8.23242e-07	HomovsWT
ZMYM2	7750	ENSG00000121741	chr13	0.338034	7.19721	7.03456	9.28928e-06	6.51909e-05	HeterovsWT		KCNMB4	27345	ENSG00000135643	chr12	5.35038	-0.699332	10.1097	1.70805e-07	1.1333e-06	HomovsWT
ACTR1B	10120	ENSG00000115073	chr2	0.583511	6.61709	7.03217	9.32229e-06	6.53667e-05	HeterovsWT		MXD3	83463	ENSG00000213347	chr5	1.02363	5.2083	10.3901	1.2444e-07	8.75725e-07	HomovsWT
SPTAN1	6709	ENSG00000197694	chr9	0.387057	7.6415	7.03085	9.34044e-06	6.54602e-05	HeterovsWT		IARS	NA	NA	chr9	-0.420342	9.59182	-10.6965	8.87225e-08	6.61377e-07	HomovsWT
PDGFB	5155	ENSG00000100311	chr22	-2.01481	-0.772052	-7.02913	9.36417e-06	6.55926e-05	HeterovsWT		CTC1	80169	ENSG00000178971	chr17	0.780091	4.83416	10.3136	1.35567e-07	9.40385e-07	HomovsWT
AL035446.2	NA	NA	chr6	-0.470878	6.01227	-7.02802	9.37968e-06	6.56675e-05	HeterovsWT		CD302	9936	ENSG00000241399	chr2	-2.77548	1.7631	-9.74784	2.5971e-07	1.61362e-06	HomovsWT
RCBTB1	55213	ENSG00000136144	chr13	-0.321625	7.57448	-7.02676	9.39709e-06	6.57554e-05	HeterovsWT		ESCO2	157570	ENSG00000171320	chr8	0.849369	6.52761	10.534	1.06051e-07	7.64537e-07	HomovsWT
LINC02035	100129550	ENSG00000273033	chr3	-1.24182	1.19877	-7.02531	9.41733e-06	6.58631e-05	HeterovsWT		CD244	51744	ENSG00000122223	chr1	0.664069	5.81446	10.4646	1.14527e-07	8.18688e-07	HomovsWT
MBNL2	10150	ENSG00000139793	chr13	-0.442996	3.96618	-7.0224	9.45799e-06	6.61135e-05	HeterovsWT		AC004080.2	NA	NA	chr7	0.788728	4.29219	10.2635	1.43443e-07	9.8396e-07	HomovsWT
DCHS1	8642	ENSG00000166341	chr11	-1.20791	0.784437	-7.02103	9.47714e-06	6.62132e-05	HeterovsWT		AGA	175	ENSG00000038002	chr4	-0.708592	4.68227	-10.2732	1.41889e-07	9.75268e-07	HomovsWT
PCNT	5116	ENSG00000160299	chr21	0.425495	7.61635	7.02034	9.48681e-06	6.62467e-05	HeterovsWT		BSG	682	ENSG00000172270	chr19	-0.619079	8.29661	-10.6406	9.43214e-08	6.93972e-07	HomovsWT
TGFBR2	7048	ENSG00000163513	chr3	0.442978	7.21721	7.01931	9.5013e-06	6.63138e-05	HeterovsWT		ABCA17P	650655	ENSG00000238098	chr16	-1.11341	3.42968	-9.95953	2.02948e-07	1.31196e-06	HomovsWT
LINC00662	148189	ENSG00000261824	chr19	-0.372947	6.96477	-7.01873	9.50949e-06	6.63331e-05	HeterovsWT		CFD	1675	ENSG00000197766	chr19	-1.62735	4.6361	-10.2378	1.47658e-07	1.01032e-06	HomovsWT
EIF3F	8665	ENSG00000175390	chr11	0.348814	7.22111	7.01842	9.51383e-06	6.63331e-05	HeterovsWT		CCDC117	150275	ENSG00000159873	chr22	0.676193	6.0081	10.4626	1.14784e-07	8.1966e-07	HomovsWT
RGS14	10636	ENSG00000169220	chr5	-0.468982	5.29032	-7.01684	9.53615e-06	6.64546e-05	HeterovsWT		SNTB2	6645	ENSG00000168807	chr16	-1.11078	2.99019	-9.93044	2.09892e-07	1.34915e-06	HomovsWT
ZFYVE1	53349	ENSG00000165861	chr14	0.431094	4.93251	7.0151	9.56068e-06	6.65914e-05	HeterovsWT		CAMSAP1	157922	ENSG00000130559	chr9	0.579461	6.87008	10.5451	1.04761e-07	7.56441e-07	HomovsWT
TMED10	10972	ENSG00000170348	chr14	0.397222	6.33735	7.01356	9.58258e-06	6.67097e-05	HeterovsWT		C1GALT1	56913	ENSG00000106392	chr7	0.635843	6.90056	10.5494	1.04271e-07	7.53304e-07	HomovsWT
ZCWPW1	55063	ENSG00000078487	chr7	0.634431	3.226	7.01221	9.60171e-06	6.68086e-05	HeterovsWT		ZNF33B	7582	ENSG00000196693	chr10	0.800001	5.16597	10.3451	1.30869e-07	9.11051e-07	HomovsWT
PRKX	5613	ENSG00000183943	chrX	-0.416692	6.25145	-7.01125	9.61546e-06	6.68358e-05	HeterovsWT		EIF4H	7458	ENSG00000106682	chr7	-0.584549	9.34014	-10.6457	9.37899e-08	6.91516e-07	HomovsWT
SLC25A1	6576	ENSG00000100075	chr22	0.487431	7.07284	7.01126	9.61523e-06	6.68358e-05	HeterovsWT		ATP6V0A2	23545	ENSG00000185344	chr12	0.518203	6.41963	10.5002	1.10093e-07	7.90739e-07	HomovsWT
RRP1B	23076	ENSG00000160208	chr21	-0.318316	8.24222	-7.0098	9.63613e-06	6.69452e-05	HeterovsWT		ADD1	118	ENSG00000087274	chr4	0.442368	7.87934	10.5877	9.99597e-08	7.27802e-07	HomovsWT
AC110285.2	NA	NA	chr17	0.512127	5.30424	7.00867	9.65223e-06	6.70228e-05	HeterovsWT		GBE1	2632	ENSG00000114480	chr3	0.494465	7.63476	10.5667	1.02299e-07	7.41815e-07	HomovsWT
PLAC8	51316	ENSG00000145287	chr4	0.439021	4.37226	7.00746	9.6695e-06	6.71084e-05	HeterovsWT		WASH5P	375690	ENSG00000282458	chr19	-1.87746	0.937965	-9.7004	2.74628e-07	1.69028e-06	HomovsWT
ZBTB42	100128927	ENSG00000179627	chr14	0.928531	2.73217	6.99858	9.79773e-06	6.79636e-05	HeterovsWT		MOB4	25843	ENSG00000115540	chr2	-1.07292	4.62992	-10.2314	1.48732e-07	1.01563e-06	HomovsWT
STARD13	90627	ENSG00000133121	chr13	-4.6261	-2.47667	-6.9971	9.81923e-06	6.8078e-05	HeterovsWT		SRSF4	6429	ENSG00000116350	chr1	0.479894	6.9672	10.5074	1.0922e-07	7.8655e-07	HomovsWT
AREL1	9870	ENSG00000119682	chr14	0.405795	6.13682	6.99433	9.85972e-06	6.83238e-05	HeterovsWT		GPR160	26996	ENSG00000173890	chr3	1.14138	4.48095	10.2402	1.4726e-07	1.00811e-06	HomovsWT
FO393414.3	NA	NA	chr6	-1.16821	1.51769	-6.99023	9.91991e-06	6.87059e-05	HeterovsWT		IL1RAP	3556	ENSG00000196083	chr3	-0.978787	5.13653	-10.3156	1.35273e-07	9.38824e-07	HomovsWT
DPH6-DT	100507466	NA	chr15	-0.809148	2.9155	-6.98875	9.94166e-06	6.88116e-05	HeterovsWT		PSMG1	8624	ENSG00000183527	chr21	-0.524069	6.79726	-10.4852	1.11939e-07	8.02671e-07	HomovsWT
CPSF7	79869	ENSG00000149532	chr11	0.323642	6.95548	6.9885	9.9453e-06	6.88116e-05	HeterovsWT		KIF13B	23303	ENSG00000197892	chr8	0.623501	5.53385	10.3382	1.31886e-07	9.17189e-07	HomovsWT
REEP5	7905	ENSG00000129625	chr5	-0.472134	4.60103	-6.98412	1.00103e-05	6.92258e-05	HeterovsWT		BX640514.2	NA	NA	chr20	0.814916	4.17644	10.1139	1.69985e-07	1.12952e-06	HomovsWT
LINC00346	NA	NA	chr13	2.07079	-1.97099	6.9823	1.00374e-05	6.93781e-05	HeterovsWT		EFCAB2	84288	ENSG00000203666	chr1	-0.786227	5.57147	-10.2931	1.38737e-07	9.56592e-07	HomovsWT
DNAH14	127602	ENSG00000185842	chr1	-0.463049	5.33291	-6.97672	1.01209e-05	6.99194e-05	HeterovsWT		AC090796.1	NA	NA	chr8	-5.31466	1.68036	-9.89634	2.18357e-07	1.39171e-06	HomovsWT
AC068875.1	NA	NA	chr15	-1.29216	-0.423419	-6.97234	1.0187e-05	7.03404e-05	HeterovsWT		MYH9	4627	ENSG00000100345	chr22	0.546651	9.85946	10.5957	9.90855e-08	7.22372e-07	HomovsWT
EGFL7	51162	ENSG00000172889	chr9	0.806318	4.31501	6.96998	1.02227e-05	7.05222e-05	HeterovsWT		AC004585.1	NA	NA	chr17	-2.57242	1.46806	-9.63461	2.96842e-07	1.8039e-06	HomovsWT
CACNA2D4	93589	ENSG00000151062	chr12	-0.39584	5.49306	-6.96992	1.02237e-05	7.05222e-05	HeterovsWT		WDTC1	23038	ENSG00000142784	chr1	0.600392	6.44278	10.4192	1.20461e-07	8.53915e-07	HomovsWT
PRKACB	5567	ENSG00000142875	chr1	-0.498633	5.84255	-6.96951	1.02299e-05	7.05294e-05	HeterovsWT		RNF40	9810	ENSG00000103549	chr16	0.744301	7.02679	10.4631	1.14718e-07	8.19621e-07	HomovsWT
AC011505.1	NA	NA	chr19	-1.30441	-0.777905	-6.96502	1.02985e-05	7.09661e-05	HeterovsWT		TRIM37	4591	ENSG00000108395	chr17	0.631353	5.85065	10.3503	1.30111e-07	9.07021e-07	HomovsWT
PLIN2	123	ENSG00000147872	chr9	-0.351753	5.78593	-6.96269	1.03343e-05	7.11764e-05	HeterovsWT		RFTN2	130132	ENSG00000162944	chr2	-1.8759	1.88477	-9.67272	2.8375e-07	1.73598e-06	HomovsWT
BUB1	699	ENSG00000169679	chr2	0.335998	7.71121	6.96192	1.0346e-05	7.12214e-05	HeterovsWT		ANKLE2	23141	ENSG00000176915	chr12	0.571923	7.35363	10.4838	1.12116e-07	8.03143e-07	HomovsWT
POLH	5429	ENSG00000170734	chr6	0.412451	5.29517	6.96113	1.03582e-05	7.12332e-05	HeterovsWT		MYBL2	4605	ENSG00000101057	chr20	0.713451	8.7587	10.5439	1.04899e-07	7.5663e-07	HomovsWT
HERC4	26091	ENSG00000148634	chr10	-0.327243	6.57245	-6.9613	1.03556e-05	7.12332e-05	HeterovsWT		CD2BP2	10421	ENSG00000169217	chr16	0.91051	6.41607	10.4046	1.22439e-07	8.65679e-07	HomovsWT
GKAP1	80318	ENSG00000165113	chr9	-0.763392	2.90376	-6.96021	1.03725e-05	7.12951e-05	HeterovsWT		DLGAP1	9229	ENSG00000170579	chr18	-4.26843	0.0207642	-9.70029	2.74661e-07	1.69028e-06	HomovsWT
RIC3	79608	ENSG00000166405	chr11	-1.32396	0.568263	-6.95766	1.04119e-05	7.1483e-05	HeterovsWT		LRRC8A	56262	ENSG00000136802	chr9	0.70656	5.52682	10.3041	1.37036e-07	9.47669e-07	HomovsWT
ZNF586	54807	ENSG00000083828	chr19	0.630816	3.42606	6.9577	1.04113e-05	7.1483e-05	HeterovsWT		SLCO4A1	28231	ENSG00000101187	chr20	0.574025	7.34169	10.4787	1.12746e-07	8.07228e-07	HomovsWT
PHKB	5257	ENSG00000102893	chr16	0.330498	6.94142	6.95742	1.04156e-05	7.1483e-05	HeterovsWT		SPCS3	60559	ENSG00000129128	chr4	0.599157	7.86606	10.5049	1.09522e-07	7.87608e-07	HomovsWT
DMAC2	55101	ENSG00000105341	chr19	0.367274	5.99131	6.95637	1.04319e-05	7.15588e-05	HeterovsWT		TTPAL	79183	ENSG00000124120	chr20	0.616323	5.23266	10.2518	1.45342e-07	9.95555e-07	HomovsWT
CDKN1A	1026	ENSG00000124762	chr6	-0.728411	3.1524	-6.95363	1.04746e-05	7.17791e-05	HeterovsWT		TRIB3	57761	ENSG00000101255	chr20	-0.871104	7.50562	-10.4848	1.11991e-07	8.02671e-07	HomovsWT
SLC7A5	8140	ENSG00000103257	chr16	-0.330267	9.4523	-6.95364	1.04743e-05	7.17791e-05	HeterovsWT		MICALL2	79778	ENSG00000164877	chr7	0.840164	6.29189	10.361	1.28558e-07	9.00037e-07	HomovsWT
ETS2	2114	ENSG00000157557	chr21	-0.53583	4.17132	-6.95194	1.05009e-05	7.19231e-05	HeterovsWT		ARMCX5-GPRASP2	100528062	ENSG00000286237	chrX;chrX	-2.19776	0.808227	-9.58726	3.14018e-07	1.89051e-06	HomovsWT
PLCB2	5330	ENSG00000137841	chr15	-0.348457	7.26561	-6.94616	1.05917e-05	7.25083e-05	HeterovsWT		ECE1	1889	ENSG00000117298	chr1	0.63428	6.51411	10.3942	1.23874e-07	8.72645e-07	HomovsWT
AL109809.5	NA	NA	chr20	-0.725462	3.03649	-6.94548	1.06025e-05	7.25453e-05	HeterovsWT		ZFP62	643836	ENSG00000196670	chr5	0.665727	5.76771	10.313	1.3566e-07	9.40548e-07	HomovsWT
TNRC6C-AS1	NA	NA	chr17	1.60762	1.65919	6.94504	1.06094e-05	7.25565e-05	HeterovsWT		CHST12	55501	ENSG00000136213	chr7	0.654463	5.84816	10.2982	1.37935e-07	9.52434e-07	HomovsWT
MKI67	4288	ENSG00000148773	chr10	0.403926	8.93554	6.94355	1.0633e-05	7.26734e-05	HeterovsWT		INTS10	55174	ENSG00000104613	chr8	-0.473352	7.36085	-10.4471	1.16777e-07	8.31704e-07	HomovsWT
UBR4	23352	ENSG00000127481	chr1	0.346839	9.25676	6.94329	1.06372e-05	7.26734e-05	HeterovsWT		MLH1	4292	ENSG00000076242	chr3	0.488269	7.18871	10.4314	1.18843e-07	8.44207e-07	HomovsWT
NAPB	63908	ENSG00000125814	chr20	-0.398308	5.35921	-6.94171	1.06623e-05	7.28078e-05	HeterovsWT		SRCIN1	80725	ENSG00000277363	chr17	0.853856	4.34391	10.1189	1.6902e-07	1.12623e-06	HomovsWT
TLE6	79816	ENSG00000104953	chr19	-1.16851	1.51052	-6.93987	1.06916e-05	7.29712e-05	HeterovsWT		HMGB3	3149	ENSG00000029993	chrX	0.571772	6.36917	10.3548	1.29447e-07	9.04864e-07	HomovsWT
LINC00476	100128782	ENSG00000175611	chr9	-0.774607	3.58347	-6.93917	1.07026e-05	7.29739e-05	HeterovsWT		SLAMF8	56833	ENSG00000158714	chr1	-3.93885	-0.3872	-9.9146	2.1378e-07	1.3696e-06	HomovsWT
ATPAF2	91647	ENSG00000171953	chr17	0.464961	4.74416	6.93917	1.07027e-05	7.29739e-05	HeterovsWT		LINC02193	105371423	NA	chr16	-1.06324	3.41776	-9.92051	2.12318e-07	1.36217e-06	HomovsWT
XPO1	7514	ENSG00000082898	chr2	0.372278	9.12832	6.93879	1.07087e-05	7.29782e-05	HeterovsWT		ST3GAL4	6484	ENSG00000110080	chr11	0.648325	6.68536	10.3885	1.24659e-07	8.76807e-07	HomovsWT
LIMK1	3984	ENSG00000106683	chr7	-0.439143	6.19345	-6.93792	1.07227e-05	7.30366e-05	HeterovsWT		TXNL4A	10907	ENSG00000141759	chr18	0.964658	6.79279	10.3841	1.25275e-07	8.80229e-07	HomovsWT
LINC01692	339622	ENSG00000226983	chr21	-2.37127	-0.420362	-6.93682	1.07402e-05	7.30829e-05	HeterovsWT		ITGAV	3685	ENSG00000138448	chr2	0.917351	3.34359	9.90995	2.14934e-07	1.37247e-06	HomovsWT
STAG3L3	442578	NA	chr7	-0.733261	5.71876	-6.93699	1.07375e-05	7.30829e-05	HeterovsWT		PLCD3	113026	ENSG00000161714	chr17	1.42274	2.87758	9.81538	2.3995e-07	1.5102e-06	HomovsWT
AC005020.2	NA	NA	chr7	-1.64612	0.988399	-6.93364	1.07913e-05	7.33568e-05	HeterovsWT		BOLA1	51027	ENSG00000178096	chr1	-2.82744	0.81417	-9.55703	3.25536e-07	1.95035e-06	HomovsWT
GON4L	54856	ENSG00000116580	chr1	0.314522	6.59882	6.93378	1.07891e-05	7.33568e-05	HeterovsWT		STIL	6491	ENSG00000123473	chr1	0.61629	6.98612	10.3994	1.23153e-07	8.68918e-07	HomovsWT
[truncated: 5,744 more rows]
