# Supplementary material for: Functional and Multi-Omics Analysis of an Optimized CRISPR-Mediated FURIN Depletion in Cultured Pro-Monocytic Cells
Source: Preprints.org preprint supplement (doi:10.20944/preprints202312.0178.v1), 2023-12-04
Supplement: Supplementary file 2 [file supplementary]

Archive with 14 entries (14 files):
- Figure_S1a.jpg
- Figure_S1b.jpg
- Figure_S2.jpg
- Figure_S3.jpg
- Figure_S4a.jpg
- Figure_S4b.jpg
- Figure_S5.jpg
- ST1.xlsx
- ST2.xlsx
- ST3.xlsx
- ST4.xlsx
- ST5.xlsx
- ST6.xlsx
- Supplementary_materials_short_descriptions.pdf
