# Supplementary material for: Functional and Multi-Omics Analysis of an Optimized CRISPR-Mediated FURIN Depletion in Cultured Pro-Monocytic Cells
Source: Preprints.org preprint supplement (doi:10.20944/preprints202312.0178.v1), 2023-12-04
Supplement: Supplementary file 2 [file supplementary › ST3.xlsx]

## Sheet: ST3
NAME	GS<br> follow link to MSigDB	GS DETAILS	SIZE	ES	NES	NOM p-val	FDR q-val	FWER p-val	RANK AT MAX	LEADING EDGE	Comparison	Direction			NAME	GS<br> follow link to MSigDB	GS DETAILS	SIZE	ES	NES	NOM p-val	FDR q-val	FWER p-val	RANK AT MAX	LEADING EDGE	Comparison	Direction
KEGG_ACUTE_MYELOID_LEUKEMIA	KEGG_ACUTE_MYELOID_LEUKEMIA	Details ...	54	0.464241	1.44216	0.0516796	1	0.993	2032	tags=20%, list=15%, signal=24%	HeterovsU937	pos			GO_CALCIUM_MEDIATED_SIGNALING	GO_CALCIUM_MEDIATED_SIGNALING	Details ...	109	-0.510587	-1.74895	0	0.292728	1	1878	tags=29%, list=14%, signal=34%	HeterovsU937	neg
KEGG_BASAL_TRANSCRIPTION_FACTORS	KEGG_BASAL_TRANSCRIPTION_FACTORS	Details ...	26	0.513746	1.36398	0.116915	1	1	21	tags=4%, list=0%, signal=4%	HeterovsU937	pos			GO_CARTILAGE_DEVELOPMENT	GO_CARTILAGE_DEVELOPMENT		100	-0.597661	-1.62972	0	0.423073	1	1369	tags=22%, list=10%, signal=24%	HomovsHetero	neg
KEGG_GLYCOLYSIS_GLUCONEOGENESIS	KEGG_GLYCOLYSIS_GLUCONEOGENESIS	Details ...	33	0.471926	1.32058	0.152	1	1	130	tags=6%, list=1%, signal=6%	HeterovsU937	pos			GO_CD4_POSITIVE_ALPHA_BETA_T_CELL_ACTIVATION	GO_CD4_POSITIVE_ALPHA_BETA_T_CELL_ACTIVATION	Details ...	58	0.427498	1.62486	0	0.676544	1	1692	tags=34%, list=12%, signal=39%	HomovsHetero	pos
KEGG_MELANOGENESIS	KEGG_MELANOGENESIS	Details ...	61	0.410458	1.31899	0.123737	1	1	1930	tags=20%, list=14%, signal=23%	HeterovsU937	pos			GO_CELL_CELL_JUNCTION_ORGANIZATION	GO_CELL_CELL_JUNCTION_ORGANIZATION		116	-0.586932	-1.61826	0	0.426587	1	1514	tags=26%, list=11%, signal=29%	HomovsHetero	neg
KEGG_MISMATCH_REPAIR	KEGG_MISMATCH_REPAIR	Details ...	21	0.506916	1.3001	0.159251	1	1	3843	tags=67%, list=28%, signal=93%	HeterovsU937	pos			GO_CELL_CHEMOTAXIS	GO_CELL_CHEMOTAXIS	Details ...	141	-0.492297	-1.74481	0	0.270215	1	2030	tags=34%, list=15%, signal=40%	HeterovsU937	neg
KEGG_PROSTATE_CANCER	KEGG_PROSTATE_CANCER	Details ...	71	0.376683	1.24152	0.156658	1	1	2051	tags=24%, list=15%, signal=28%	HeterovsU937	pos			GO_CELLULAR_RESPONSE_TO_RETINOIC_ACID	GO_CELLULAR_RESPONSE_TO_RETINOIC_ACID	Details ...	36	-0.743441	-1.79415	0	0.228111	0.722	430	tags=19%, list=3%, signal=20%	HomovsHetero	neg
KEGG_CELL_ADHESION_MOLECULES_CAMS	KEGG_CELL_ADHESION_MOLECULES_CAMS	Details ...	62	0.37667	1.23371	0.182278	1	1	442	tags=15%, list=3%, signal=15%	HeterovsU937	pos			GO_CHROMOSOME_LOCALIZATION	GO_CHROMOSOME_LOCALIZATION		60	0.419682	1.63596	0	0.626049	1	4243	tags=45%, list=31%, signal=65%	HomovsU937	pos
KEGG_DNA_REPLICATION	KEGG_DNA_REPLICATION	Details ...	30	0.433438	1.22844	0.223844	1	1	3796	tags=53%, list=28%, signal=74%	HeterovsU937	pos			GO_DETECTION_OF_STIMULUS_INVOLVED_IN_SENSORY_PERCEPTION	GO_DETECTION_OF_STIMULUS_INVOLVED_IN_SENSORY_PERCEPTION	Details ...	35	-0.700642	-1.81088	0	0.301957	0.82	1933	tags=46%, list=14%, signal=53%	HomovsU937	neg
KEGG_HEDGEHOG_SIGNALING_PATHWAY	KEGG_HEDGEHOG_SIGNALING_PATHWAY	Details ...	32	0.433811	1.21346	0.229829	1	1	1308	tags=16%, list=10%, signal=17%	HeterovsU937	pos			GO_MODIFICATION_OF_POSTSYNAPTIC_STRUCTURE	GO_MODIFICATION_OF_POSTSYNAPTIC_STRUCTURE	Details ...	13	-0.858129	-1.77854	0.00145985	0.234357	0.835	331	tags=31%, list=2%, signal=32%	HomovsHetero	neg
KEGG_REGULATION_OF_ACTIN_CYTOSKELETON	KEGG_REGULATION_OF_ACTIN_CYTOSKELETON	Details ...	141	0.329813	1.20046	0.137931	1	1	1696	tags=16%, list=12%, signal=18%	HeterovsU937	pos			GO_KILLING_OF_CELLS_OF_OTHER_ORGANISM	GO_KILLING_OF_CELLS_OF_OTHER_ORGANISM	Details ...	17	-0.801079	-1.76303	0.00698324	0.254838	0.927	496	tags=29%, list=4%, signal=30%	HomovsHetero	neg
KEGG_CELL_CYCLE	KEGG_CELL_CYCLE	Details ...	113	0.332747	1.1906	0.173797	1	1	3845	tags=39%, list=28%, signal=54%	HeterovsU937	pos			GO_DNA_DEPENDENT_DNA_REPLICATION	GO_DNA_DEPENDENT_DNA_REPLICATION	Details ...	130	0.388477	1.63724	0	0.633229	1	4393	tags=53%, list=32%, signal=78%	HomovsU937	pos
KEGG_TERPENOID_BACKBONE_BIOSYNTHESIS	KEGG_TERPENOID_BACKBONE_BIOSYNTHESIS	Details ...	12	0.521965	1.18795	0.262899	1	1	4076	tags=50%, list=30%, signal=71%	HeterovsU937	pos			GO_T_CELL_MEDIATED_IMMUNITY	GO_T_CELL_MEDIATED_IMMUNITY		68	-0.539677	-1.70947	0.00165563	0.268167	1	1310	tags=28%, list=10%, signal=31%	HeterovsU937	neg
KEGG_LEISHMANIA_INFECTION	KEGG_LEISHMANIA_INFECTION	Details ...	49	0.38074	1.18506	0.220874	1	1	28	tags=4%, list=0%, signal=4%	HeterovsU937	pos			GO_NEGATIVE_REGULATION_OF_LYMPHOCYTE_MEDIATED_IMMUNITY	GO_NEGATIVE_REGULATION_OF_LYMPHOCYTE_MEDIATED_IMMUNITY		25	-0.652258	-1.70721	0.0103448	0.269489	1	1486	tags=36%, list=11%, signal=40%	HeterovsU937	neg
KEGG_PATHOGENIC_ESCHERICHIA_COLI_INFECTION	KEGG_PATHOGENIC_ESCHERICHIA_COLI_INFECTION	Details ...	36	0.400078	1.15138	0.26764	1	1	2867	tags=33%, list=21%, signal=42%	HeterovsU937	pos			GO_DNA_PACKAGING	GO_DNA_PACKAGING	Details ...	124	0.390551	1.68244	0	0.637466	1	3945	tags=47%, list=29%, signal=65%	HomovsU937	pos
KEGG_PYRIMIDINE_METABOLISM	KEGG_PYRIMIDINE_METABOLISM	Details ...	86	0.337647	1.14836	0.208333	1	1	1763	tags=19%, list=13%, signal=21%	HeterovsU937	pos			GO_EMBRYONIC_HINDLIMB_MORPHOGENESIS	GO_EMBRYONIC_HINDLIMB_MORPHOGENESIS	Details ...	16	-0.775339	-1.66177	0	0.388576	1	185	tags=19%, list=1%, signal=19%	HomovsHetero	neg
KEGG_FATTY_ACID_METABOLISM	KEGG_FATTY_ACID_METABOLISM	Details ...	29	0.381752	1.07755	0.346835	1	1	1268	tags=21%, list=9%, signal=23%	HeterovsU937	pos			GO_POSITIVE_REGULATION_OF_T_CELL_MEDIATED_CYTOTOXICITY	GO_POSITIVE_REGULATION_OF_T_CELL_MEDIATED_CYTOTOXICITY		14	-0.727297	-1.7098	0.0167504	0.271611	1	3101	tags=64%, list=23%, signal=83%	HeterovsU937	neg
KEGG_NON_SMALL_CELL_LUNG_CANCER	KEGG_NON_SMALL_CELL_LUNG_CANCER	Details ...	48	0.348127	1.07611	0.360743	1	1	2032	tags=17%, list=15%, signal=20%	HeterovsU937	pos			GO_REGULATION_OF_LYMPHOCYTE_MEDIATED_IMMUNITY	GO_REGULATION_OF_LYMPHOCYTE_MEDIATED_IMMUNITY		97	-0.51687	-1.71463	0.00171527	0.272607	1	1486	tags=25%, list=11%, signal=28%	HeterovsU937	neg
KEGG_HOMOLOGOUS_RECOMBINATION	KEGG_HOMOLOGOUS_RECOMBINATION	Details ...	23	0.403187	1.07045	0.348668	1	1	4161	tags=61%, list=31%, signal=88%	HeterovsU937	pos			GO_REGULATION_OF_MODIFICATION_OF_SYNAPTIC_STRUCTURE	GO_REGULATION_OF_MODIFICATION_OF_SYNAPTIC_STRUCTURE	Details ...	10	-0.866862	-1.71535	0.00151286	0.272739	0.996	149	tags=20%, list=1%, signal=20%	HomovsHetero	neg
KEGG_NICOTINATE_AND_NICOTINAMIDE_METABOLISM	KEGG_NICOTINATE_AND_NICOTINAMIDE_METABOLISM	Details ...	15	0.448281	1.06925	0.401376	1	1	1153	tags=20%, list=8%, signal=22%	HeterovsU937	pos			GO_CD4_POSITIVE_ALPHA_BETA_T_CELL_DIFFERENTIATION	GO_CD4_POSITIVE_ALPHA_BETA_T_CELL_DIFFERENTIATION		45	-0.580644	-1.71092	0.00668896	0.27298	1	2782	tags=36%, list=20%, signal=45%	HeterovsU937	neg
KEGG_BASAL_CELL_CARCINOMA	KEGG_BASAL_CELL_CARCINOMA	Details ...	35	0.366688	1.05999	0.38	1	1	1775	tags=20%, list=13%, signal=23%	HeterovsU937	pos			GO_NEUROTROPHIN_SIGNALING_PATHWAY	GO_NEUROTROPHIN_SIGNALING_PATHWAY		24	-0.662158	-1.71226	0.00686106	0.274143	1	1961	tags=29%, list=14%, signal=34%	HeterovsU937	neg
KEGG_RNA_DEGRADATION	KEGG_RNA_DEGRADATION	Details ...	53	0.330208	1.04289	0.363636	1	1	4331	tags=34%, list=32%, signal=50%	HeterovsU937	pos			GO_HETEROPHILIC_CELL_CELL_ADHESION_VIA_PLASMA_MEMBRANE_CELL_ADHESION_MOLECULES	GO_HETEROPHILIC_CELL_CELL_ADHESION_VIA_PLASMA_MEMBRANE_CELL_ADHESION_MOLECULES		15	-0.720152	-1.71532	0.00846024	0.275826	1	779	tags=27%, list=6%, signal=28%	HeterovsU937	neg
KEGG_GLYCOSPHINGOLIPID_BIOSYNTHESIS_GANGLIO_SERIES	KEGG_GLYCOSPHINGOLIPID_BIOSYNTHESIS_GANGLIO_SERIES	Details ...	10	0.466165	1.04234	0.441242	1	1	80	tags=10%, list=1%, signal=10%	HeterovsU937	pos			GO_POSITIVE_REGULATION_OF_PROTEIN_TYROSINE_KINASE_ACTIVITY	GO_POSITIVE_REGULATION_OF_PROTEIN_TYROSINE_KINASE_ACTIVITY		32	-0.608569	-1.70323	0.0196078	0.275961	1	1363	tags=38%, list=10%, signal=42%	HeterovsU937	neg
KEGG_OOCYTE_MEIOSIS	KEGG_OOCYTE_MEIOSIS	Details ...	85	0.297987	1.02644	0.383333	1	1	2786	tags=22%, list=21%, signal=28%	HeterovsU937	pos			GO_ACTIVATION_OF_PHOSPHOLIPASE_C_ACTIVITY	GO_ACTIVATION_OF_PHOSPHOLIPASE_C_ACTIVITY	Details ...	15	-0.729976	-1.74052	0.0119454	0.2761	1	1630	tags=53%, list=12%, signal=61%	HeterovsU937	neg
KEGG_SMALL_CELL_LUNG_CANCER	KEGG_SMALL_CELL_LUNG_CANCER	Details ...	66	0.317618	1.0191	0.428235	1	1	1893	tags=21%, list=14%, signal=25%	HeterovsU937	pos			GO_PHOTOTRANSDUCTION	GO_PHOTOTRANSDUCTION	Details ...	23	-0.66145	-1.74487	0.0118644	0.276612	1	1879	tags=35%, list=14%, signal=40%	HeterovsU937	neg
KEGG_SPLICEOSOME	KEGG_SPLICEOSOME	Details ...	113	0.284206	1.01835	0.4039	1	1	4719	tags=48%, list=35%, signal=73%	HeterovsU937	pos			GO_AXIS_SPECIFICATION	GO_AXIS_SPECIFICATION	Details ...	41	-0.700329	-1.75349	0.00120048	0.277052	0.953	937	tags=20%, list=7%, signal=21%	HomovsHetero	neg
KEGG_ARACHIDONIC_ACID_METABOLISM	KEGG_ARACHIDONIC_ACID_METABOLISM	Details ...	18	0.403634	1.0111	0.432836	1	1	1860	tags=28%, list=14%, signal=32%	HeterovsU937	pos			GO_CELLULAR_RESPONSE_TO_INTERFERON_BETA	GO_CELLULAR_RESPONSE_TO_INTERFERON_BETA		13	-0.762302	-1.71654	0.00846024	0.277319	1	2116	tags=54%, list=16%, signal=64%	HeterovsU937	neg
KEGG_BASE_EXCISION_REPAIR	KEGG_BASE_EXCISION_REPAIR	Details ...	29	0.360816	1.01059	0.432692	0.994917	1	4110	tags=45%, list=30%, signal=64%	HeterovsU937	pos			GO_ALPHA_BETA_T_CELL_ACTIVATION_INVOLVED_IN_IMMUNE_RESPONSE	GO_ALPHA_BETA_T_CELL_ACTIVATION_INVOLVED_IN_IMMUNE_RESPONSE		36	-0.599186	-1.72206	0.00840336	0.277379	1	2782	tags=39%, list=20%, signal=49%	HeterovsU937	neg
KEGG_NEUROTROPHIN_SIGNALING_PATHWAY	KEGG_NEUROTROPHIN_SIGNALING_PATHWAY	Details ...	106	0.278211	0.99559	0.444759	1	1	1484	tags=8%, list=11%, signal=9%	HeterovsU937	pos			GO_EPIDERMIS_DEVELOPMENT	GO_EPIDERMIS_DEVELOPMENT		156	-0.561375	-1.5737	0	0.448721	1	1530	tags=22%, list=11%, signal=25%	HomovsHetero	neg
KEGG_INSULIN_SIGNALING_PATHWAY	KEGG_INSULIN_SIGNALING_PATHWAY	Details ...	105	0.276653	0.981872	0.478836	1	1	2377	tags=21%, list=18%, signal=25%	HeterovsU937	pos			GO_CELL_CELL_SIGNALING_INVOLVED_IN_CARDIAC_CONDUCTION	GO_CELL_CELL_SIGNALING_INVOLVED_IN_CARDIAC_CONDUCTION	Details ...	12	-0.776832	-1.74663	0.00176056	0.277802	1	1384	tags=42%, list=10%, signal=46%	HeterovsU937	neg
KEGG_ENDOMETRIAL_CANCER	KEGG_ENDOMETRIAL_CANCER	Details ...	46	0.31472	0.956025	0.5201	1	1	2069	tags=20%, list=15%, signal=23%	HeterovsU937	pos			GO_POSITIVE_REGULATION_OF_LIPID_STORAGE	GO_POSITIVE_REGULATION_OF_LIPID_STORAGE		16	-0.718465	-1.71971	0.0159858	0.278215	1	1371	tags=25%, list=10%, signal=28%	HeterovsU937	neg
KEGG_PRIMARY_IMMUNODEFICIENCY	KEGG_PRIMARY_IMMUNODEFICIENCY	Details ...	19	0.368107	0.94253	0.527132	1	1	8	tags=5%, list=0%, signal=5%	HeterovsU937	pos			GO_CELLULAR_COMPONENT_MAINTENANCE	GO_CELLULAR_COMPONENT_MAINTENANCE	Details ...	44	-0.686259	-1.71163	0.00116822	0.278443	0.998	2432	tags=41%, list=18%, signal=50%	HomovsHetero	neg
KEGG_LYSOSOME	KEGG_LYSOSOME	Details ...	96	0.263853	0.918833	0.587302	1	1	1239	tags=10%, list=9%, signal=11%	HeterovsU937	pos			GO_RESPONSE_TO_CHEMOKINE	GO_RESPONSE_TO_CHEMOKINE		27	-0.639826	-1.72307	0.00353357	0.279711	1	1716	tags=41%, list=13%, signal=47%	HeterovsU937	neg
KEGG_TRYPTOPHAN_METABOLISM	KEGG_TRYPTOPHAN_METABOLISM	Details ...	21	0.330405	0.909116	0.561151	1	1	1813	tags=29%, list=13%, signal=33%	HeterovsU937	pos			GO_REGULATION_OF_THE_FORCE_OF_HEART_CONTRACTION	GO_REGULATION_OF_THE_FORCE_OF_HEART_CONTRACTION		15	-0.728601	-1.70008	0.00860585	0.279805	1	404	tags=20%, list=3%, signal=21%	HeterovsU937	neg
KEGG_COLORECTAL_CANCER	KEGG_COLORECTAL_CANCER	Details ...	57	0.285016	0.905427	0.62982	1	1	2032	tags=23%, list=15%, signal=27%	HeterovsU937	pos			GO_DOPAMINE_TRANSPORT	GO_DOPAMINE_TRANSPORT	Details ...	20	0.774798	1.97381	0.00251889	0.280841	0.605	666	tags=45%, list=5%, signal=47%	HeterovsU937	pos
KEGG_NITROGEN_METABOLISM	KEGG_NITROGEN_METABOLISM	Details ...	10	0.398998	0.889821	0.59589	1	1	477	tags=20%, list=4%, signal=21%	HeterovsU937	pos			GO_POSITIVE_REGULATION_OF_CHEMOTAXIS	GO_POSITIVE_REGULATION_OF_CHEMOTAXIS		71	-0.535482	-1.71658	0.00166389	0.282323	1	1996	tags=31%, list=15%, signal=36%	HeterovsU937	neg
KEGG_FOCAL_ADHESION	KEGG_FOCAL_ADHESION	Details ...	126	0.239139	0.87979	0.722798	1	1	1893	tags=16%, list=14%, signal=18%	HeterovsU937	pos			GO_ACUTE_INFLAMMATORY_RESPONSE	GO_ACUTE_INFLAMMATORY_RESPONSE		56	-0.551957	-1.69745	0.00472441	0.282531	1	2851	tags=48%, list=21%, signal=61%	HeterovsU937	neg
KEGG_SPHINGOLIPID_METABOLISM	KEGG_SPHINGOLIPID_METABOLISM	Details ...	28	0.313334	0.876583	0.621554	1	1	2349	tags=36%, list=17%, signal=43%	HeterovsU937	pos			GO_MORPHOGENESIS_OF_AN_ENDOTHELIUM	GO_MORPHOGENESIS_OF_AN_ENDOTHELIUM		10	-0.764505	-1.69424	0.0189329	0.282798	1	249	tags=30%, list=2%, signal=31%	HeterovsU937	neg
KEGG_RNA_POLYMERASE	KEGG_RNA_POLYMERASE	Details ...	28	0.31819	0.876016	0.59601	1	1	5211	tags=57%, list=38%, signal=93%	HeterovsU937	pos			GO_POSITIVE_REGULATION_OF_CD4_POSITIVE_ALPHA_BETA_T_CELL_DIFFERENTIATION	GO_POSITIVE_REGULATION_OF_CD4_POSITIVE_ALPHA_BETA_T_CELL_DIFFERENTIATION	Details ...	20	-0.690588	-1.72585	0.0122378	0.282836	1	1044	tags=30%, list=8%, signal=32%	HeterovsU937	neg
KEGG_PARKINSONS_DISEASE	KEGG_PARKINSONS_DISEASE	Details ...	96	0.240824	0.847925	0.749347	1	1	14	tags=1%, list=0%, signal=1%	HeterovsU937	pos			GO_REGULATION_OF_CALCIUM_ION_TRANSPORT_INTO_CYTOSOL	GO_REGULATION_OF_CALCIUM_ION_TRANSPORT_INTO_CYTOSOL	Details ...	52	-0.565445	-1.72362	0.00811688	0.283509	1	1384	tags=27%, list=10%, signal=30%	HeterovsU937	neg
KEGG_P53_SIGNALING_PATHWAY	KEGG_P53_SIGNALING_PATHWAY	Details ...	53	0.268343	0.838753	0.715294	1	1	1450	tags=19%, list=11%, signal=21%	HeterovsU937	pos			GO_RESPONSE_TO_CAFFEINE	GO_RESPONSE_TO_CAFFEINE	Details ...	12	-0.771509	-1.74687	0.0109689	0.284517	1	673	tags=33%, list=5%, signal=35%	HeterovsU937	neg
KEGG_PROPANOATE_METABOLISM	KEGG_PROPANOATE_METABOLISM	Details ...	25	0.301086	0.79932	0.715405	1	1	130	tags=4%, list=1%, signal=4%	HeterovsU937	pos			GO_EMBRYONIC_PATTERN_SPECIFICATION	GO_EMBRYONIC_PATTERN_SPECIFICATION	Details ...	37	-0.696966	-1.71567	0.00610501	0.284708	0.996	937	tags=24%, list=7%, signal=26%	HomovsHetero	neg
KEGG_LYSINE_DEGRADATION	KEGG_LYSINE_DEGRADATION	Details ...	37	0.263801	0.795367	0.752525	1	1	3411	tags=38%, list=25%, signal=50%	HeterovsU937	pos			GO_REGULATION_OF_CALCIUM_ION_TRANSMEMBRANE_TRANSPORT	GO_REGULATION_OF_CALCIUM_ION_TRANSMEMBRANE_TRANSPORT		81	-0.517989	-1.69512	0.0017094	0.284831	1	2445	tags=33%, list=18%, signal=40%	HeterovsU937	neg
KEGG_FC_GAMMA_R_MEDIATED_PHAGOCYTOSIS	KEGG_FC_GAMMA_R_MEDIATED_PHAGOCYTOSIS	Details ...	79	0.236344	0.795058	0.836735	1	1	490	tags=5%, list=4%, signal=5%	HeterovsU937	pos			GO_POSITIVE_REGULATION_OF_POTASSIUM_ION_TRANSPORT	GO_POSITIVE_REGULATION_OF_POTASSIUM_ION_TRANSPORT	Details ...	23	-0.758177	-1.70253	0.00129702	0.285209	0.998	920	tags=22%, list=7%, signal=23%	HomovsHetero	neg
KEGG_PROGESTERONE_MEDIATED_OOCYTE_MATURATION	KEGG_PROGESTERONE_MEDIATED_OOCYTE_MATURATION	Details ...	68	0.243351	0.788405	0.839695	1	1	2786	tags=24%, list=21%, signal=29%	HeterovsU937	pos			GO_REGULATION_OF_CARDIAC_MUSCLE_CONTRACTION_BY_CALCIUM_ION_SIGNALING	GO_REGULATION_OF_CARDIAC_MUSCLE_CONTRACTION_BY_CALCIUM_ION_SIGNALING	Details ...	15	-0.742726	-1.74887	0.00178571	0.285303	1	386	tags=27%, list=3%, signal=27%	HeterovsU937	neg
KEGG_WNT_SIGNALING_PATHWAY	KEGG_WNT_SIGNALING_PATHWAY	Details ...	103	0.216024	0.772834	0.885856	1	1	1025	tags=8%, list=8%, signal=8%	HeterovsU937	pos			GO_EXTRACELLULAR_STRUCTURE_ORGANIZATION	GO_EXTRACELLULAR_STRUCTURE_ORGANIZATION	Details ...	193	-0.614019	-1.71967	0	0.295455	0.994	1419	tags=32%, list=10%, signal=35%	HomovsHetero	neg
KEGG_ETHER_LIPID_METABOLISM	KEGG_ETHER_LIPID_METABOLISM	Details ...	19	0.30642	0.758212	0.753027	1	1	4846	tags=53%, list=36%, signal=82%	HeterovsU937	pos			GO_EXTRACELLULAR_STRUCTURE_ORGANIZATION	GO_EXTRACELLULAR_STRUCTURE_ORGANIZATION	Details ...	193	-0.546288	-1.65345	0	0.391071	1	1422	tags=26%, list=10%, signal=29%	HomovsU937	neg
KEGG_PANCREATIC_CANCER	KEGG_PANCREATIC_CANCER	Details ...	63	0.233883	0.757957	0.838961	1	1	2032	tags=17%, list=15%, signal=20%	HeterovsU937	pos			GO_NEGATIVE_REGULATION_OF_ADAPTIVE_IMMUNE_RESPONSE	GO_NEGATIVE_REGULATION_OF_ADAPTIVE_IMMUNE_RESPONSE	Details ...	29	-0.634676	-1.72641	0.0100503	0.287135	1	3047	tags=52%, list=22%, signal=67%	HeterovsU937	neg
KEGG_VALINE_LEUCINE_AND_ISOLEUCINE_DEGRADATION	KEGG_VALINE_LEUCINE_AND_ISOLEUCINE_DEGRADATION	Details ...	38	0.256275	0.74307	0.813725	1	1	3145	tags=26%, list=23%, signal=34%	HeterovsU937	pos			GO_METANEPHROS_MORPHOGENESIS	GO_METANEPHROS_MORPHOGENESIS	Details ...	10	-0.875192	-1.71826	0.00298954	0.287172	0.994	250	tags=30%, list=2%, signal=31%	HomovsHetero	neg
KEGG_N_GLYCAN_BIOSYNTHESIS	KEGG_N_GLYCAN_BIOSYNTHESIS	Details ...	38	0.247829	0.722421	0.857798	1	1	3387	tags=32%, list=25%, signal=42%	HeterovsU937	pos			GO_REGULATION_OF_LEUKOCYTE_CHEMOTAXIS	GO_REGULATION_OF_LEUKOCYTE_CHEMOTAXIS	Details ...	61	-0.57071	-1.77947	0.00162866	0.287377	0.999	1735	tags=31%, list=13%, signal=36%	HeterovsU937	neg
KEGG_UBIQUITIN_MEDIATED_PROTEOLYSIS	KEGG_UBIQUITIN_MEDIATED_PROTEOLYSIS	Details ...	118	0.199062	0.711555	0.957816	1	1	933	tags=4%, list=7%, signal=5%	HeterovsU937	pos			GO_POSITIVE_REGULATION_OF_NEUTROPHIL_MIGRATION	GO_POSITIVE_REGULATION_OF_NEUTROPHIL_MIGRATION	Details ...	21	-0.685949	-1.73468	0.0066778	0.287792	1	1735	tags=38%, list=13%, signal=44%	HeterovsU937	neg
KEGG_STEROID_BIOSYNTHESIS	KEGG_STEROID_BIOSYNTHESIS		13	0.29836	0.69747	0.798969	1	1	2142	tags=31%, list=16%, signal=36%	HeterovsU937	pos			GO_MONONUCLEAR_CELL_MIGRATION	GO_MONONUCLEAR_CELL_MIGRATION	Details ...	33	-0.633177	-1.75852	0.00643087	0.288101	1	1785	tags=48%, list=13%, signal=56%	HeterovsU937	neg
KEGG_AMYOTROPHIC_LATERAL_SCLEROSIS_ALS	KEGG_AMYOTROPHIC_LATERAL_SCLEROSIS_ALS		39	0.229776	0.689052	0.890625	1	1	2818	tags=26%, list=21%, signal=32%	HeterovsU937	pos			GO_NITRIC_OXIDE_MEDIATED_SIGNAL_TRANSDUCTION	GO_NITRIC_OXIDE_MEDIATED_SIGNAL_TRANSDUCTION	Details ...	11	-0.776599	-1.73038	0.0145455	0.288107	1	1712	tags=55%, list=13%, signal=62%	HeterovsU937	neg
KEGG_FRUCTOSE_AND_MANNOSE_METABOLISM	KEGG_FRUCTOSE_AND_MANNOSE_METABOLISM		25	0.245936	0.661191	0.876812	1	1	2661	tags=28%, list=20%, signal=35%	HeterovsU937	pos			GO_HISTONE_METHYLATION	GO_HISTONE_METHYLATION		111	0.355151	1.44127	0	0.661254	1	2251	tags=26%, list=17%, signal=31%	HomovsU937	pos
KEGG_PYRUVATE_METABOLISM	KEGG_PYRUVATE_METABOLISM		27	0.24151	0.647315	0.910891	1	1	4076	tags=37%, list=30%, signal=53%	HeterovsU937	pos			GO_RESPONSE_TO_MUSCLE_STRETCH	GO_RESPONSE_TO_MUSCLE_STRETCH	Details ...	12	-0.78361	-1.77013	0.00694444	0.288476	1	2360	tags=50%, list=17%, signal=60%	HeterovsU937	neg
KEGG_VEGF_SIGNALING_PATHWAY	KEGG_VEGF_SIGNALING_PATHWAY		57	0.191286	0.60745	0.977612	1	1	2032	tags=18%, list=15%, signal=21%	HeterovsU937	pos			GO_NEUROTROPHIN_TRK_RECEPTOR_SIGNALING_PATHWAY	GO_NEUROTROPHIN_TRK_RECEPTOR_SIGNALING_PATHWAY	Details ...	19	-0.7203	-1.77607	0.00172117	0.288507	0.999	1758	tags=32%, list=13%, signal=36%	HeterovsU937	neg
KEGG_PROTEASOME	KEGG_PROTEASOME		39	0.201784	0.599353	0.964115	1	1	159	tags=3%, list=1%, signal=3%	HeterovsU937	pos			GO_REGULATION_OF_LIPOPOLYSACCHARIDE_MEDIATED_SIGNALING_PATHWAY	GO_REGULATION_OF_LIPOPOLYSACCHARIDE_MEDIATED_SIGNALING_PATHWAY		16	-0.689589	-1.68845	0.0157343	0.290399	1	3254	tags=56%, list=24%, signal=74%	HeterovsU937	neg
KEGG_RIBOSOME	KEGG_RIBOSOME		75	0.178402	0.597521	0.992268	1	1	5446	tags=59%, list=40%, signal=97%	HeterovsU937	pos			GO_REGULATION_OF_SYNAPTIC_TRANSMISSION_GLUTAMATERGIC	GO_REGULATION_OF_SYNAPTIC_TRANSMISSION_GLUTAMATERGIC	Details ...	34	-0.619919	-1.75478	0.00346021	0.290851	1	2062	tags=41%, list=15%, signal=48%	HeterovsU937	neg
KEGG_INOSITOL_PHOSPHATE_METABOLISM	KEGG_INOSITOL_PHOSPHATE_METABOLISM		48	0.18929	0.588586	0.978972	1	1	1920	tags=17%, list=14%, signal=19%	HeterovsU937	pos			GO_HUMORAL_IMMUNE_RESPONSE	GO_HUMORAL_IMMUNE_RESPONSE	Details ...	89	-0.66338	-1.81005	0	0.255441	0.583	907	tags=33%, list=7%, signal=35%	HomovsHetero	neg
KEGG_ALZHEIMERS_DISEASE	KEGG_ALZHEIMERS_DISEASE		126	0.157837	0.577004	1	1	1	3207	tags=20%, list=24%, signal=26%	HeterovsU937	pos			GO_CELL_JUNCTION_MAINTENANCE	GO_CELL_JUNCTION_MAINTENANCE	Details ...	21	-0.761659	-1.70348	0.00133511	0.293195	0.998	1506	tags=43%, list=11%, signal=48%	HomovsHetero	neg
KEGG_NUCLEOTIDE_EXCISION_REPAIR	KEGG_NUCLEOTIDE_EXCISION_REPAIR		40	0.196439	0.572183	0.97416	0.99883	1	3877	tags=40%, list=29%, signal=56%	HeterovsU937	pos			GO_AMYLOID_BETA_CLEARANCE	GO_AMYLOID_BETA_CLEARANCE		26	-0.623101	-1.68858	0.0181219	0.294309	1	2074	tags=35%, list=15%, signal=41%	HeterovsU937	neg
KEGG_CHRONIC_MYELOID_LEUKEMIA	KEGG_CHRONIC_MYELOID_LEUKEMIA		67	0.168001	0.557772	0.992665	0.987845	1	2032	tags=15%, list=15%, signal=17%	HeterovsU937	pos			GO_CELL_COMMUNICATION_BY_ELECTRICAL_COUPLING_INVOLVED_IN_CARDIAC_CONDUCTION	GO_CELL_COMMUNICATION_BY_ELECTRICAL_COUPLING_INVOLVED_IN_CARDIAC_CONDUCTION		11	-0.755811	-1.67765	0.00899281	0.29449	1	386	tags=27%, list=3%, signal=28%	HeterovsU937	neg
KEGG_VASOPRESSIN_REGULATED_WATER_REABSORPTION	KEGG_VASOPRESSIN_REGULATED_WATER_REABSORPTION		32	0.170619	0.490116	0.997555	0.989278	1	1765	tags=13%, list=13%, signal=14%	HeterovsU937	pos			GO_HUMORAL_IMMUNE_RESPONSE	GO_HUMORAL_IMMUNE_RESPONSE	Details ...	89	-0.604541	-1.76233	0	0.34791	0.98	2030	tags=39%, list=15%, signal=46%	HomovsU937	neg
KEGG_ARGININE_AND_PROLINE_METABOLISM	KEGG_ARGININE_AND_PROLINE_METABOLISM	Details ...	32	-0.634538	-1.60453	0.0104439	0.224492	0.798	2102	tags=38%, list=15%, signal=44%	HomovsU937	neg			GO_CELLULAR_RESPONSE_TO_PH	GO_CELLULAR_RESPONSE_TO_PH		14	-0.713365	-1.67441	0.0120482	0.295762	1	455	tags=14%, list=3%, signal=15%	HeterovsU937	neg
KEGG_CARDIAC_MUSCLE_CONTRACTION	KEGG_CARDIAC_MUSCLE_CONTRACTION	Details ...	41	-0.629066	-1.81484	0.00512821	0.072706	0.183	725	tags=15%, list=5%, signal=15%	HeterovsU937	neg			GO_CELL_COMMUNICATION_BY_ELECTRICAL_COUPLING	GO_CELL_COMMUNICATION_BY_ELECTRICAL_COUPLING	Details ...	14	-0.755651	-1.78013	0.00521739	0.295784	0.999	1798	tags=57%, list=13%, signal=66%	HeterovsU937	neg
KEGG_COMPLEMENT_AND_COAGULATION_CASCADES	KEGG_COMPLEMENT_AND_COAGULATION_CASCADES	Details ...	27	-0.728684	-1.96591	0.00165837	0.0276749	0.025	1963	tags=70%, list=14%, signal=82%	HeterovsU937	neg			GO_POSITIVE_REGULATION_OF_GRANULOCYTE_CHEMOTAXIS	GO_POSITIVE_REGULATION_OF_GRANULOCYTE_CHEMOTAXIS		19	-0.665362	-1.68003	0.0240137	0.296545	1	1735	tags=37%, list=13%, signal=42%	HeterovsU937	neg
KEGG_COMPLEMENT_AND_COAGULATION_CASCADES	KEGG_COMPLEMENT_AND_COAGULATION_CASCADES	Details ...	27	-0.76773	-1.87864	0	0.00877457	0.01	1437	tags=56%, list=11%, signal=62%	HomovsU937	neg			GO_INTERLEUKIN_1_BETA_PRODUCTION	GO_INTERLEUKIN_1_BETA_PRODUCTION	Details ...	58	-0.572252	-1.77066	0.00160514	0.296694	1	1460	tags=29%, list=11%, signal=33%	HeterovsU937	neg
KEGG_GLYCINE_SERINE_AND_THREONINE_METABOLISM	KEGG_GLYCINE_SERINE_AND_THREONINE_METABOLISM	Details ...	19	-0.707592	-1.77634	0.00654665	0.0901365	0.283	1452	tags=42%, list=11%, signal=47%	HeterovsU937	neg			GO_POSITIVE_REGULATION_OF_T_HELPER_CELL_DIFFERENTIATION	GO_POSITIVE_REGULATION_OF_T_HELPER_CELL_DIFFERENTIATION	Details ...	14	-0.746893	-1.75856	0.00899281	0.296698	1	1044	tags=36%, list=8%, signal=39%	HeterovsU937	neg
KEGG_HISTIDINE_METABOLISM	KEGG_HISTIDINE_METABOLISM	Details ...	18	-0.800544	-1.84812	0.00136426	0.0108236	0.025	902	tags=39%, list=7%, signal=42%	HomovsU937	neg			GO_NEURON_PROJECTION_ORGANIZATION	GO_NEURON_PROJECTION_ORGANIZATION		67	-0.533328	-1.67839	0.00511945	0.296731	1	2389	tags=36%, list=18%, signal=43%	HeterovsU937	neg
KEGG_AUTOIMMUNE_THYROID_DISEASE	KEGG_AUTOIMMUNE_THYROID_DISEASE	Details ...	12	-0.706144	-1.60576	0.0221088	0.281447	0.843	3231	tags=83%, list=24%, signal=109%	HeterovsU937	neg			GO_HUMORAL_IMMUNE_RESPONSE_MEDIATED_BY_CIRCULATING_IMMUNOGLOBULIN	GO_HUMORAL_IMMUNE_RESPONSE_MEDIATED_BY_CIRCULATING_IMMUNOGLOBULIN	Details ...	24	-0.796551	-1.90973	0	0.123256	0.13	1001	tags=46%, list=7%, signal=49%	HomovsU937	neg
KEGG_ALLOGRAFT_REJECTION	KEGG_ALLOGRAFT_REJECTION	Details ...	12	-0.709286	-1.58477	0.0330578	0.293014	0.891	3231	tags=83%, list=24%, signal=109%	HeterovsU937	neg			GO_HUMORAL_IMMUNE_RESPONSE_MEDIATED_BY_CIRCULATING_IMMUNOGLOBULIN	GO_HUMORAL_IMMUNE_RESPONSE_MEDIATED_BY_CIRCULATING_IMMUNOGLOBULIN	Details ...	24	-0.78149	-1.77396	0	0.225794	0.865	907	tags=46%, list=7%, signal=49%	HomovsHetero	neg
KEGG_DILATED_CARDIOMYOPATHY	KEGG_DILATED_CARDIOMYOPATHY	Details ...	42	-0.53821	-1.57928	0.0268456	0.2708	0.906	543	tags=14%, list=4%, signal=15%	HeterovsU937	neg			GO_REGULATION_OF_SUPEROXIDE_METABOLIC_PROCESS	GO_REGULATION_OF_SUPEROXIDE_METABOLIC_PROCESS		23	-0.640231	-1.66547	0.0135593	0.297574	1	597	tags=17%, list=4%, signal=18%	HeterovsU937	neg
KEGG_DRUG_METABOLISM_OTHER_ENZYMES	KEGG_DRUG_METABOLISM_OTHER_ENZYMES	Details ...	25	-0.567004	-1.52253	0.0478633	0.369344	0.976	1234	tags=24%, list=9%, signal=26%	HeterovsU937	neg			GO_SARCOPLASMIC_RETICULUM_CALCIUM_ION_TRANSPORT	GO_SARCOPLASMIC_RETICULUM_CALCIUM_ION_TRANSPORT		19	-0.663129	-1.68105	0.0118644	0.298181	1	386	tags=21%, list=3%, signal=22%	HeterovsU937	neg
KEGG_EPITHELIAL_CELL_SIGNALING_IN_HELICOBACTER_PYLORI_INFECTION	KEGG_EPITHELIAL_CELL_SIGNALING_IN_HELICOBACTER_PYLORI_INFECTION	Details ...	50	-0.499243	-1.49946	0.0465116	0.391728	0.987	2567	tags=28%, list=19%, signal=34%	HeterovsU937	neg			GO_CELLULAR_RESPONSE_TO_EPINEPHRINE_STIMULUS	GO_CELLULAR_RESPONSE_TO_EPINEPHRINE_STIMULUS		10	-0.776677	-1.67485	0.0230906	0.298243	1	382	tags=20%, list=3%, signal=21%	HeterovsU937	neg
KEGG_SYSTEMIC_LUPUS_ERYTHEMATOSUS	KEGG_SYSTEMIC_LUPUS_ERYTHEMATOSUS	Details ...	25	-0.567563	-1.48852	0.0578231	0.386871	0.991	416	tags=32%, list=3%, signal=33%	HeterovsU937	neg			GO_RESPONSE_TO_EPINEPHRINE	GO_RESPONSE_TO_EPINEPHRINE	Details ...	12	-0.777838	-1.78609	0.00497512	0.298638	0.999	1798	tags=50%, list=13%, signal=58%	HeterovsU937	neg
KEGG_RIG_I_LIKE_RECEPTOR_SIGNALING_PATHWAY	KEGG_RIG_I_LIKE_RECEPTOR_SIGNALING_PATHWAY	Details ...	47	-0.496158	-1.48384	0.0485269	0.368045	0.991	4075	tags=45%, list=30%, signal=64%	HeterovsU937	neg			GO_REGULATION_OF_PHOSPHOLIPASE_C_ACTIVITY	GO_REGULATION_OF_PHOSPHOLIPASE_C_ACTIVITY		24	-0.638655	-1.68198	0.009375	0.299788	1	1630	tags=42%, list=12%, signal=47%	HeterovsU937	neg
KEGG_O_GLYCAN_BIOSYNTHESIS	KEGG_O_GLYCAN_BIOSYNTHESIS	Details ...	16	-0.629505	-1.47874	0.055921	0.354771	0.994	1801	tags=31%, list=13%, signal=36%	HeterovsU937	neg			GO_LEUKOCYTE_ADHESION_TO_VASCULAR_ENDOTHELIAL_CELL	GO_LEUKOCYTE_ADHESION_TO_VASCULAR_ENDOTHELIAL_CELL		25	-0.64929	-1.68345	0.0121739	0.29986	1	1552	tags=36%, list=11%, signal=41%	HeterovsU937	neg
KEGG_GLYCOSAMINOGLYCAN_BIOSYNTHESIS_HEPARAN_SULFATE	KEGG_GLYCOSAMINOGLYCAN_BIOSYNTHESIS_HEPARAN_SULFATE	Details ...	16	-0.609958	-1.45398	0.0706714	0.388465	0.996	1041	tags=25%, list=8%, signal=27%	HeterovsU937	neg			GO_SODIUM_ION_IMPORT_ACROSS_PLASMA_MEMBRANE	GO_SODIUM_ION_IMPORT_ACROSS_PLASMA_MEMBRANE		10	-0.765432	-1.66591	0.014652	0.300014	1	1291	tags=50%, list=10%, signal=55%	HeterovsU937	neg
KEGG_VIRAL_MYOCARDITIS	KEGG_VIRAL_MYOCARDITIS	Details ...	37	-0.499839	-1.42895	0.0686767	0.425683	0.997	3231	tags=49%, list=24%, signal=64%	HeterovsU937	neg			GO_INTERLEUKIN_1_PRODUCTION	GO_INTERLEUKIN_1_PRODUCTION	Details ...	65	-0.567559	-1.78559	0	0.288416	0.999	1939	tags=34%, list=14%, signal=39%	HeterovsU937	neg
KEGG_TYPE_I_DIABETES_MELLITUS	KEGG_TYPE_I_DIABETES_MELLITUS	Details ...	17	-0.585855	-1.41992	0.113438	0.422766	0.999	3231	tags=59%, list=24%, signal=77%	HeterovsU937	neg			GO_PERK_MEDIATED_UNFOLDED_PROTEIN_RESPONSE	GO_PERK_MEDIATED_UNFOLDED_PROTEIN_RESPONSE		15	-0.702865	-1.66619	0.0194805	0.302925	1	1284	tags=27%, list=9%, signal=29%	HeterovsU937	neg
KEGG_GRAFT_VERSUS_HOST_DISEASE	KEGG_GRAFT_VERSUS_HOST_DISEASE	Details ...	14	-0.574313	-1.37172	0.106272	0.533996	1	3231	tags=64%, list=24%, signal=84%	HeterovsU937	neg			GO_REGULATION_OF_ACTION_POTENTIAL	GO_REGULATION_OF_ACTION_POTENTIAL		28	-0.612518	-1.66204	0.0133111	0.30319	1	1384	tags=39%, list=10%, signal=44%	HeterovsU937	neg
KEGG_CALCIUM_SIGNALING_PATHWAY	KEGG_CALCIUM_SIGNALING_PATHWAY	Details ...	96	-0.404555	-1.35453	0.0500835	0.553463	1	2817	tags=34%, list=21%, signal=43%	HeterovsU937	neg			GO_POSITIVE_REGULATION_OF_T_HELPER_1_TYPE_IMMUNE_RESPONSE	GO_POSITIVE_REGULATION_OF_T_HELPER_1_TYPE_IMMUNE_RESPONSE		10	-0.770575	-1.66817	0.0159858	0.304651	1	1191	tags=60%, list=9%, signal=66%	HeterovsU937	neg
KEGG_OLFACTORY_TRANSDUCTION	KEGG_OLFACTORY_TRANSDUCTION	Details ...	16	-0.556929	-1.35043	0.112847	0.537511	1	3686	tags=50%, list=27%, signal=69%	HeterovsU937	neg			GO_MACROPHAGE_CYTOKINE_PRODUCTION	GO_MACROPHAGE_CYTOKINE_PRODUCTION		12	-0.736873	-1.66676	0.0141093	0.304968	1	1097	tags=17%, list=8%, signal=18%	HeterovsU937	neg
KEGG_CYTOKINE_CYTOKINE_RECEPTOR_INTERACTION	KEGG_CYTOKINE_CYTOKINE_RECEPTOR_INTERACTION	Details ...	88	-0.406446	-1.34661	0.0757825	0.522601	1	2210	tags=39%, list=16%, signal=46%	HeterovsU937	neg			GO_RELEASE_OF_SEQUESTERED_CALCIUM_ION_INTO_CYTOSOL_BY_ENDOPLASMIC_RETICULUM	GO_RELEASE_OF_SEQUESTERED_CALCIUM_ION_INTO_CYTOSOL_BY_ENDOPLASMIC_RETICULUM	Details ...	16	-0.726921	-1.75874	0.0152027	0.305253	1	1384	tags=38%, list=10%, signal=42%	HeterovsU937	neg
KEGG_INTESTINAL_IMMUNE_NETWORK_FOR_IGA_PRODUCTION	KEGG_INTESTINAL_IMMUNE_NETWORK_FOR_IGA_PRODUCTION	Details ...	17	-0.544696	-1.34357	0.136752	0.507233	1	1744	tags=35%, list=13%, signal=40%	HeterovsU937	neg			GO_CELLULAR_RESPONSE_TO_ALKALOID	GO_CELLULAR_RESPONSE_TO_ALKALOID		22	-0.652509	-1.66939	0.0172414	0.305309	1	779	tags=18%, list=6%, signal=19%	HeterovsU937	neg
KEGG_LONG_TERM_DEPRESSION	KEGG_LONG_TERM_DEPRESSION	Details ...	40	-0.461828	-1.34019	0.112652	0.494013	1	2120	tags=18%, list=16%, signal=21%	HeterovsU937	neg			GO_ANTERIOR_POSTERIOR_AXIS_SPECIFICATION	GO_ANTERIOR_POSTERIOR_AXIS_SPECIFICATION	Details ...	22	-0.762388	-1.7036	0.00276625	0.305378	0.998	937	tags=27%, list=7%, signal=29%	HomovsHetero	neg
KEGG_RIBOFLAVIN_METABOLISM	KEGG_RIBOFLAVIN_METABOLISM	Details ...	10	-0.620093	-1.33225	0.16221	0.493635	1	2211	tags=40%, list=16%, signal=48%	HeterovsU937	neg			GO_T_CELL_ACTIVATION_INVOLVED_IN_IMMUNE_RESPONSE	GO_T_CELL_ACTIVATION_INVOLVED_IN_IMMUNE_RESPONSE		55	-0.547937	-1.65802	0.00840336	0.306995	1	2610	tags=38%, list=19%, signal=47%	HeterovsU937	neg
KEGG_GAP_JUNCTION	KEGG_GAP_JUNCTION	Details ...	54	-0.423489	-1.32247	0.0998363	0.498869	1	2355	tags=20%, list=17%, signal=25%	HeterovsU937	neg			GO_KERATAN_SULFATE_BIOSYNTHETIC_PROCESS	GO_KERATAN_SULFATE_BIOSYNTHETIC_PROCESS	Details ...	13	0.721365	1.89594	0	0.409544	0.952	2054	tags=54%, list=15%, signal=63%	HomovsU937	pos
KEGG_PANTOTHENATE_AND_COA_BIOSYNTHESIS	KEGG_PANTOTHENATE_AND_COA_BIOSYNTHESIS	Details ...	12	-0.578427	-1.31451	0.171527	0.499077	1	727	tags=17%, list=5%, signal=18%	HeterovsU937	neg			GO_POSITIVE_REGULATION_OF_CELL_KILLING	GO_POSITIVE_REGULATION_OF_CELL_KILLING		32	-0.608423	-1.64653	0.0176565	0.307518	1	1476	tags=28%, list=11%, signal=31%	HeterovsU937	neg
KEGG_B_CELL_RECEPTOR_SIGNALING_PATHWAY	KEGG_B_CELL_RECEPTOR_SIGNALING_PATHWAY	Details ...	64	-0.416918	-1.31382	0.103506	0.481839	1	2120	tags=20%, list=16%, signal=24%	HeterovsU937	neg			GO_NEGATIVE_REGULATION_OF_PROTEIN_MATURATION	GO_NEGATIVE_REGULATION_OF_PROTEIN_MATURATION		22	-0.632158	-1.64723	0.0208333	0.308656	1	1397	tags=36%, list=10%, signal=40%	HeterovsU937	neg
KEGG_ADIPOCYTOKINE_SIGNALING_PATHWAY	KEGG_ADIPOCYTOKINE_SIGNALING_PATHWAY	Details ...	49	-0.438084	-1.29249	0.133117	0.516401	1	1371	tags=14%, list=10%, signal=16%	HeterovsU937	neg			GO_RETINOIC_ACID_METABOLIC_PROCESS	GO_RETINOIC_ACID_METABOLIC_PROCESS	Details ...	11	-0.780414	-1.76035	0.0119048	0.309125	1	1490	tags=82%, list=11%, signal=92%	HeterovsU937	neg
KEGG_JAK_STAT_SIGNALING_PATHWAY	KEGG_JAK_STAT_SIGNALING_PATHWAY	Details ...	74	-0.389968	-1.27204	0.12398	0.553841	1	3840	tags=36%, list=28%, signal=51%	HeterovsU937	neg			GO_REGULATION_OF_RENAL_SYSTEM_PROCESS	GO_REGULATION_OF_RENAL_SYSTEM_PROCESS		12	-0.728666	-1.64823	0.0161002	0.309307	1	648	tags=25%, list=5%, signal=26%	HeterovsU937	neg
KEGG_PRION_DISEASES	KEGG_PRION_DISEASES	Details ...	24	-0.473913	-1.24922	0.184669	0.598358	1	928	tags=21%, list=7%, signal=22%	HeterovsU937	neg			GO_PROTEIN_PALMITOYLATION	GO_PROTEIN_PALMITOYLATION		29	-0.603504	-1.64947	0.0292599	0.309447	1	752	tags=21%, list=6%, signal=22%	HeterovsU937	neg
KEGG_NEUROACTIVE_LIGAND_RECEPTOR_INTERACTION	KEGG_NEUROACTIVE_LIGAND_RECEPTOR_INTERACTION	Details ...	73	-0.388625	-1.24685	0.142628	0.585354	1	1954	tags=36%, list=14%, signal=41%	HeterovsU937	neg			GO_REGULATION_OF_CARDIAC_CONDUCTION	GO_REGULATION_OF_CARDIAC_CONDUCTION	Details ...	35	-0.630308	-1.78639	0.00344234	0.310097	0.999	1905	tags=34%, list=14%, signal=40%	HeterovsU937	neg
KEGG_METABOLISM_OF_XENOBIOTICS_BY_CYTOCHROME_P450	KEGG_METABOLISM_OF_XENOBIOTICS_BY_CYTOCHROME_P450	Details ...	16	-0.523554	-1.24218	0.20302	0.580128	1	1490	tags=31%, list=11%, signal=35%	HeterovsU937	neg			GO_NEGATIVE_REGULATION_OF_LEUKOCYTE_MEDIATED_IMMUNITY	GO_NEGATIVE_REGULATION_OF_LEUKOCYTE_MEDIATED_IMMUNITY		33	-0.593779	-1.65811	0.00336134	0.3104	1	3101	tags=52%, list=23%, signal=67%	HeterovsU937	neg
KEGG_CHEMOKINE_SIGNALING_PATHWAY	KEGG_CHEMOKINE_SIGNALING_PATHWAY	Details ...	111	-0.369105	-1.2382	0.128824	0.574413	1	1961	tags=19%, list=14%, signal=22%	HeterovsU937	neg			GO_T_CELL_DIFFERENTIATION_INVOLVED_IN_IMMUNE_RESPONSE	GO_T_CELL_DIFFERENTIATION_INVOLVED_IN_IMMUNE_RESPONSE		40	-0.571517	-1.65529	0.00985222	0.311005	1	2782	tags=38%, list=20%, signal=47%	HeterovsU937	neg
KEGG_SELENOAMINO_ACID_METABOLISM	KEGG_SELENOAMINO_ACID_METABOLISM	Details ...	19	-0.484087	-1.2322	0.209983	0.572801	1	2285	tags=26%, list=17%, signal=32%	HeterovsU937	neg			GO_REGULATION_OF_LEUKOCYTE_ADHESION_TO_VASCULAR_ENDOTHELIAL_CELL	GO_REGULATION_OF_LEUKOCYTE_ADHESION_TO_VASCULAR_ENDOTHELIAL_CELL		15	-0.687469	-1.65009	0.0191972	0.311348	1	1552	tags=40%, list=11%, signal=45%	HeterovsU937	neg
KEGG_ARRHYTHMOGENIC_RIGHT_VENTRICULAR_CARDIOMYOPATHY_ARVC	KEGG_ARRHYTHMOGENIC_RIGHT_VENTRICULAR_CARDIOMYOPATHY_ARVC	Details ...	34	-0.43264	-1.19574	0.228873	0.654273	1	543	tags=15%, list=4%, signal=15%	HeterovsU937	neg			GO_MAMMARY_GLAND_DUCT_MORPHOGENESIS	GO_MAMMARY_GLAND_DUCT_MORPHOGENESIS	Details ...	18	-0.775392	-1.71977	0.00271003	0.312454	0.994	1494	tags=39%, list=11%, signal=44%	HomovsHetero	neg
KEGG_CYSTEINE_AND_METHIONINE_METABOLISM	KEGG_CYSTEINE_AND_METHIONINE_METABOLISM	Details ...	24	-0.453266	-1.19389	0.253472	0.641961	1	2490	tags=29%, list=18%, signal=36%	HeterovsU937	neg			GO_ESTABLISHMENT_OF_PROTEIN_LOCALIZATION_TO_PLASMA_MEMBRANE	GO_ESTABLISHMENT_OF_PROTEIN_LOCALIZATION_TO_PLASMA_MEMBRANE		43	-0.572103	-1.6534	0.0120069	0.312623	1	767	tags=7%, list=6%, signal=7%	HeterovsU937	neg
KEGG_GNRH_SIGNALING_PATHWAY	KEGG_GNRH_SIGNALING_PATHWAY	Details ...	71	-0.373875	-1.18433	0.207012	0.65124	1	2410	tags=18%, list=18%, signal=22%	HeterovsU937	neg			GO_CALCIUM_MEDIATED_SIGNALING_USING_INTRACELLULAR_CALCIUM_SOURCE	GO_CALCIUM_MEDIATED_SIGNALING_USING_INTRACELLULAR_CALCIUM_SOURCE		11	-0.753787	-1.65209	0.0153322	0.313013	1	1310	tags=45%, list=10%, signal=50%	HeterovsU937	neg
KEGG_HEMATOPOIETIC_CELL_LINEAGE	KEGG_HEMATOPOIETIC_CELL_LINEAGE	Details ...	34	-0.422455	-1.18207	0.246599	0.639643	1	597	tags=26%, list=4%, signal=28%	HeterovsU937	neg			GO_DETECTION_OF_LIGHT_STIMULUS	GO_DETECTION_OF_LIGHT_STIMULUS		31	-0.611718	-1.64338	0.0069808	0.313061	1	2079	tags=35%, list=15%, signal=42%	HeterovsU937	neg
KEGG_ARGININE_AND_PROLINE_METABOLISM	KEGG_ARGININE_AND_PROLINE_METABOLISM	Details ...	32	-0.42286	-1.15493	0.291439	0.698702	1	3058	tags=44%, list=23%, signal=56%	HeterovsU937	neg			GO_MONOCYTE_CHEMOTAXIS	GO_MONOCYTE_CHEMOTAXIS		19	-0.660156	-1.65045	0.017094	0.313871	1	1575	tags=53%, list=12%, signal=59%	HeterovsU937	neg
KEGG_PPAR_SIGNALING_PATHWAY	KEGG_PPAR_SIGNALING_PATHWAY	Details ...	36	-0.405692	-1.14398	0.270358	0.711693	1	2492	tags=28%, list=18%, signal=34%	HeterovsU937	neg			GO_CARDIAC_RIGHT_VENTRICLE_MORPHOGENESIS	GO_CARDIAC_RIGHT_VENTRICLE_MORPHOGENESIS		10	-0.767161	-1.64146	0.0163339	0.315033	1	354	tags=20%, list=3%, signal=21%	HeterovsU937	neg
KEGG_TGF_BETA_SIGNALING_PATHWAY	KEGG_TGF_BETA_SIGNALING_PATHWAY	Details ...	54	-0.374386	-1.124	0.295868	0.754606	1	2045	tags=22%, list=15%, signal=26%	HeterovsU937	neg			GO_FIBRINOLYSIS	GO_FIBRINOLYSIS		10	-0.749376	-1.63863	0.0357751	0.319099	1	1963	tags=60%, list=14%, signal=70%	HeterovsU937	neg
KEGG_TIGHT_JUNCTION	KEGG_TIGHT_JUNCTION	Details ...	82	-0.335166	-1.08723	0.306156	0.845923	1	1438	tags=13%, list=11%, signal=15%	HeterovsU937	neg			GO_POSTSYNAPSE_ORGANIZATION	GO_POSTSYNAPSE_ORGANIZATION		109	-0.474764	-1.60649	0.0015873	0.320606	1	2416	tags=37%, list=18%, signal=44%	HeterovsU937	neg
KEGG_TOLL_LIKE_RECEPTOR_SIGNALING_PATHWAY	KEGG_TOLL_LIKE_RECEPTOR_SIGNALING_PATHWAY	Details ...	63	-0.332952	-1.04881	0.39374	0.945116	1	2120	tags=22%, list=16%, signal=26%	HeterovsU937	neg			GO_INTRASPECIES_INTERACTION_BETWEEN_ORGANISMS	GO_INTRASPECIES_INTERACTION_BETWEEN_ORGANISMS	Details ...	28	-0.746956	-1.73767	0.00123153	0.321122	0.983	795	tags=21%, list=6%, signal=23%	HomovsHetero	neg
KEGG_TYROSINE_METABOLISM	KEGG_TYROSINE_METABOLISM	Details ...	18	-0.413731	-1.02402	0.42685	1	1	2876	tags=33%, list=21%, signal=42%	HeterovsU937	neg			GO_NEGATIVE_REGULATION_OF_B_CELL_ACTIVATION	GO_NEGATIVE_REGULATION_OF_B_CELL_ACTIVATION		21	-0.629519	-1.60715	0.0292096	0.321551	1	1939	tags=43%, list=14%, signal=50%	HeterovsU937	neg
KEGG_STARCH_AND_SUCROSE_METABOLISM	KEGG_STARCH_AND_SUCROSE_METABOLISM	Details ...	20	-0.400186	-1.02213	0.454698	0.987612	1	4947	tags=65%, list=36%, signal=102%	HeterovsU937	neg			GO_VASCULAR_WOUND_HEALING	GO_VASCULAR_WOUND_HEALING		10	-0.735158	-1.61135	0.0243478	0.321607	1	1716	tags=60%, list=13%, signal=69%	HeterovsU937	neg
KEGG_LEUKOCYTE_TRANSENDOTHELIAL_MIGRATION	KEGG_LEUKOCYTE_TRANSENDOTHELIAL_MIGRATION	Details ...	80	-0.314156	-1.02115	0.406699	0.969131	1	2002	tags=23%, list=15%, signal=26%	HeterovsU937	neg			GO_FOAM_CELL_DIFFERENTIATION	GO_FOAM_CELL_DIFFERENTIATION		18	-0.640625	-1.60816	0.0283688	0.321708	1	2119	tags=39%, list=16%, signal=46%	HeterovsU937	neg
KEGG_GLYCOSAMINOGLYCAN_DEGRADATION	KEGG_GLYCOSAMINOGLYCAN_DEGRADATION	Details ...	14	-0.430388	-1.02088	0.44198	0.949286	1	3374	tags=43%, list=25%, signal=57%	HeterovsU937	neg			GO_REGULATION_OF_T_HELPER_1_TYPE_IMMUNE_RESPONSE	GO_REGULATION_OF_T_HELPER_1_TYPE_IMMUNE_RESPONSE		14	-0.674472	-1.61019	0.0260417	0.321909	1	2291	tags=64%, list=17%, signal=77%	HeterovsU937	neg
KEGG_GLYCEROLIPID_METABOLISM	KEGG_GLYCEROLIPID_METABOLISM	Details ...	32	-0.369063	-1.01573	0.448276	0.944681	1	942	tags=16%, list=7%, signal=17%	HeterovsU937	neg			GO_POSITIVE_REGULATION_OF_LEUKOCYTE_ADHESION_TO_VASCULAR_ENDOTHELIAL_CELL	GO_POSITIVE_REGULATION_OF_LEUKOCYTE_ADHESION_TO_VASCULAR_ENDOTHELIAL_CELL		14	-0.697109	-1.62374	0.0212766	0.321925	1	1191	tags=36%, list=9%, signal=39%	HeterovsU937	neg
KEGG_BETA_ALANINE_METABOLISM	KEGG_BETA_ALANINE_METABOLISM	Details ...	18	-0.410055	-1.01223	0.441536	0.936486	1	1818	tags=33%, list=13%, signal=38%	HeterovsU937	neg			GO_TISSUE_REMODELING	GO_TISSUE_REMODELING		89	-0.486973	-1.62266	0.00671141	0.321989	1	1332	tags=25%, list=10%, signal=27%	HeterovsU937	neg
KEGG_ECM_RECEPTOR_INTERACTION	KEGG_ECM_RECEPTOR_INTERACTION	Details ...	35	-0.358214	-1.00641	0.464812	0.934461	1	1016	tags=17%, list=7%, signal=18%	HeterovsU937	neg			GO_MESONEPHRIC_TUBULE_MORPHOGENESIS	GO_MESONEPHRIC_TUBULE_MORPHOGENESIS	Details ...	30	-0.73299	-1.7417	0.00252844	0.32201	0.973	1271	tags=27%, list=9%, signal=29%	HomovsHetero	neg
KEGG_ADHERENS_JUNCTION	KEGG_ADHERENS_JUNCTION		59	-0.321587	-0.995676	0.481544	0.947358	1	857	tags=7%, list=6%, signal=7%	HeterovsU937	neg			GO_REGULATION_OF_DENDRITIC_SPINE_DEVELOPMENT	GO_REGULATION_OF_DENDRITIC_SPINE_DEVELOPMENT		60	-0.522096	-1.62043	0.00977199	0.32213	1	2019	tags=32%, list=15%, signal=37%	HeterovsU937	neg
KEGG_ALANINE_ASPARTATE_AND_GLUTAMATE_METABOLISM	KEGG_ALANINE_ASPARTATE_AND_GLUTAMATE_METABOLISM		20	-0.385733	-0.991943	0.456747	0.939962	1	3058	tags=35%, list=23%, signal=45%	HeterovsU937	neg			GO_PLATELET_ACTIVATION	GO_PLATELET_ACTIVATION		100	-0.48379	-1.61742	0.00490998	0.322237	1	2086	tags=25%, list=15%, signal=29%	HeterovsU937	neg
KEGG_OTHER_GLYCAN_DEGRADATION	KEGG_OTHER_GLYCAN_DEGRADATION		14	-0.422127	-0.990052	0.471002	0.927673	1	4297	tags=43%, list=32%, signal=63%	HeterovsU937	neg			GO_POSITIVE_REGULATION_OF_SIGNALING_RECEPTOR_ACTIVITY	GO_POSITIVE_REGULATION_OF_SIGNALING_RECEPTOR_ACTIVITY		19	-0.64586	-1.61931	0.0222985	0.322542	1	1431	tags=53%, list=11%, signal=59%	HeterovsU937	neg
KEGG_MAPK_SIGNALING_PATHWAY	KEGG_MAPK_SIGNALING_PATHWAY		181	-0.268377	-0.981747	0.474242	0.934208	1	2473	tags=20%, list=18%, signal=24%	HeterovsU937	neg			GO_ANGIOGENESIS_INVOLVED_IN_WOUND_HEALING	GO_ANGIOGENESIS_INVOLVED_IN_WOUND_HEALING		16	-0.673736	-1.62113	0.0371681	0.323075	1	2074	tags=50%, list=15%, signal=59%	HeterovsU937	neg
KEGG_VASCULAR_SMOOTH_MUSCLE_CONTRACTION	KEGG_VASCULAR_SMOOTH_MUSCLE_CONTRACTION		63	-0.310853	-0.97429	0.490939	0.938167	1	2120	tags=17%, list=16%, signal=21%	HeterovsU937	neg			GO_CYCLIC_NUCLEOTIDE_BIOSYNTHETIC_PROCESS	GO_CYCLIC_NUCLEOTIDE_BIOSYNTHETIC_PROCESS		10	-0.740139	-1.61166	0.0295139	0.323392	1	664	tags=30%, list=5%, signal=32%	HeterovsU937	neg
KEGG_T_CELL_RECEPTOR_SIGNALING_PATHWAY	KEGG_T_CELL_RECEPTOR_SIGNALING_PATHWAY		79	-0.297892	-0.966697	0.5088	0.942871	1	2473	tags=25%, list=18%, signal=31%	HeterovsU937	neg			GO_PORE_COMPLEX_ASSEMBLY	GO_PORE_COMPLEX_ASSEMBLY	Details ...	19	-0.720426	-1.78663	0.00680272	0.323514	0.999	987	tags=16%, list=7%, signal=17%	HeterovsU937	neg
KEGG_AXON_GUIDANCE	KEGG_AXON_GUIDANCE		84	-0.29052	-0.962202	0.505673	0.93935	1	2221	tags=24%, list=16%, signal=28%	HeterovsU937	neg			GO_PEPTIDE_CROSS_LINKING	GO_PEPTIDE_CROSS_LINKING		10	-0.740928	-1.62419	0.0391459	0.323608	1	2086	tags=60%, list=15%, signal=71%	HeterovsU937	neg
KEGG_DRUG_METABOLISM_CYTOCHROME_P450	KEGG_DRUG_METABOLISM_CYTOCHROME_P450		14	-0.414424	-0.954084	0.521222	0.946618	1	1344	tags=21%, list=10%, signal=24%	HeterovsU937	neg			GO_SEQUESTERING_OF_CALCIUM_ION	GO_SEQUESTERING_OF_CALCIUM_ION		66	-0.510992	-1.60839	0.0141732	0.323671	1	2255	tags=27%, list=17%, signal=33%	HeterovsU937	neg
KEGG_HISTIDINE_METABOLISM	KEGG_HISTIDINE_METABOLISM		18	-0.372566	-0.931674	0.530782	0.991892	1	1694	tags=33%, list=12%, signal=38%	HeterovsU937	neg			GO_VASODILATION	GO_VASODILATION		16	-0.666072	-1.61793	0.0350877	0.323792	1	2722	tags=56%, list=20%, signal=70%	HeterovsU937	neg
KEGG_RENAL_CELL_CARCINOMA	KEGG_RENAL_CELL_CARCINOMA		58	-0.306046	-0.925607	0.588045	0.990823	1	2120	tags=19%, list=16%, signal=22%	HeterovsU937	neg			GO_REGULATION_OF_ADAPTIVE_IMMUNE_RESPONSE	GO_REGULATION_OF_ADAPTIVE_IMMUNE_RESPONSE		112	-0.479031	-1.61458	0.00343053	0.324187	1	1310	tags=24%, list=10%, signal=26%	HeterovsU937	neg
KEGG_CITRATE_CYCLE_TCA_CYCLE	KEGG_CITRATE_CYCLE_TCA_CYCLE		23	-0.34814	-0.907488	0.577586	1	1	3787	tags=35%, list=28%, signal=48%	HeterovsU937	neg			GO_ADHERENS_JUNCTION_ORGANIZATION	GO_ADHERENS_JUNCTION_ORGANIZATION		40	-0.555649	-1.61242	0.00340136	0.324224	1	1509	tags=25%, list=11%, signal=28%	HeterovsU937	neg
KEGG_ABC_TRANSPORTERS	KEGG_ABC_TRANSPORTERS		20	-0.351049	-0.897472	0.626689	1	1	2155	tags=30%, list=16%, signal=36%	HeterovsU937	neg			GO_ECTODERM_DEVELOPMENT	GO_ECTODERM_DEVELOPMENT	Details ...	16	-0.804841	-1.73312	0.00414938	0.325006	0.988	411	tags=25%, list=3%, signal=26%	HomovsHetero	neg
KEGG_PORPHYRIN_AND_CHLOROPHYLL_METABOLISM	KEGG_PORPHYRIN_AND_CHLOROPHYLL_METABOLISM		20	-0.349645	-0.891453	0.60199	1	1	4708	tags=55%, list=35%, signal=84%	HeterovsU937	neg			GO_GOLGI_TO_ENDOSOME_TRANSPORT	GO_GOLGI_TO_ENDOSOME_TRANSPORT	Details ...	14	-0.808754	-1.68323	0.00430416	0.32503	1	360	tags=14%, list=3%, signal=15%	HomovsHetero	neg
KEGG_TASTE_TRANSDUCTION	KEGG_TASTE_TRANSDUCTION		12	-0.392783	-0.889289	0.602763	1	1	3732	tags=58%, list=27%, signal=80%	HeterovsU937	neg			GO_L_ASCORBIC_ACID_METABOLIC_PROCESS	GO_L_ASCORBIC_ACID_METABOLIC_PROCESS	Details ...	10	0.795412	1.94374	0	0.420484	0.835	1	tags=10%, list=0%, signal=10%	HomovsU937	pos
KEGG_FC_EPSILON_RI_SIGNALING_PATHWAY	KEGG_FC_EPSILON_RI_SIGNALING_PATHWAY		59	-0.287088	-0.889277	0.640065	1	1	4170	tags=32%, list=31%, signal=46%	HeterovsU937	neg			GO_LEUKOCYTE_MEDIATED_CYTOTOXICITY	GO_LEUKOCYTE_MEDIATED_CYTOTOXICITY		65	-0.52175	-1.62457	0.00642055	0.325326	1	1753	tags=28%, list=13%, signal=32%	HeterovsU937	neg
KEGG_BLADDER_CANCER	KEGG_BLADDER_CANCER		35	-0.311284	-0.875182	0.635714	1	1	2884	tags=31%, list=21%, signal=40%	HeterovsU937	neg			GO_ODONTOGENESIS_OF_DENTIN_CONTAINING_TOOTH	GO_ODONTOGENESIS_OF_DENTIN_CONTAINING_TOOTH	Details ...	46	-0.683166	-1.72495	0.00115607	0.325465	0.992	1466	tags=30%, list=11%, signal=34%	HomovsHetero	neg
KEGG_PURINE_METABOLISM	KEGG_PURINE_METABOLISM		113	-0.256277	-0.87179	0.72381	1	1	859	tags=8%, list=6%, signal=8%	HeterovsU937	neg			GO_PROTEIN_HYDROXYLATION	GO_PROTEIN_HYDROXYLATION	Details ...	18	-0.773073	-1.68107	0.00679348	0.325629	1	1805	tags=39%, list=13%, signal=45%	HomovsHetero	neg
KEGG_LONG_TERM_POTENTIATION	KEGG_LONG_TERM_POTENTIATION		50	-0.285506	-0.855932	0.690789	1	1	2817	tags=30%, list=21%, signal=38%	HeterovsU937	neg			GO_MYELOID_LEUKOCYTE_MIGRATION	GO_MYELOID_LEUKOCYTE_MIGRATION		109	-0.469938	-1.61291	0.00157233	0.325662	1	2030	tags=35%, list=15%, signal=41%	HeterovsU937	neg
KEGG_OXIDATIVE_PHOSPHORYLATION	KEGG_OXIDATIVE_PHOSPHORYLATION		96	-0.251114	-0.849393	0.73064	1	1	4972	tags=40%, list=37%, signal=62%	HeterovsU937	neg			GO_NEGATIVE_REGULATION_OF_SPROUTING_ANGIOGENESIS	GO_NEGATIVE_REGULATION_OF_SPROUTING_ANGIOGENESIS		14	-0.701767	-1.62537	0.03125	0.326221	1	1552	tags=36%, list=11%, signal=40%	HeterovsU937	neg
KEGG_GLYCEROPHOSPHOLIPID_METABOLISM	KEGG_GLYCEROPHOSPHOLIPID_METABOLISM		56	-0.275866	-0.839903	0.725753	1	1	1756	tags=13%, list=13%, signal=14%	HeterovsU937	neg			GO_POSITIVE_REGULATION_OF_COLD_INDUCED_THERMOGENESIS	GO_POSITIVE_REGULATION_OF_COLD_INDUCED_THERMOGENESIS		55	-0.524686	-1.62894	0.0130719	0.326249	1	2722	tags=33%, list=20%, signal=41%	HeterovsU937	neg
KEGG_GALACTOSE_METABOLISM	KEGG_GALACTOSE_METABOLISM		19	-0.329461	-0.823891	0.70302	1	1	2432	tags=21%, list=18%, signal=26%	HeterovsU937	neg			GO_EXCITATORY_SYNAPSE_ASSEMBLY	GO_EXCITATORY_SYNAPSE_ASSEMBLY	Details ...	13	-0.835051	-1.72091	0.00573066	0.326251	0.994	890	tags=54%, list=7%, signal=58%	HomovsHetero	neg
KEGG_NOTCH_SIGNALING_PATHWAY	KEGG_NOTCH_SIGNALING_PATHWAY		37	-0.284794	-0.810797	0.762602	1	1	2090	tags=19%, list=15%, signal=22%	HeterovsU937	neg			GO_SENSORY_PERCEPTION_OF_TASTE	GO_SENSORY_PERCEPTION_OF_TASTE		12	-0.718448	-1.63121	0.025	0.326637	1	230	tags=17%, list=2%, signal=17%	HeterovsU937	neg
KEGG_GLYCOSPHINGOLIPID_BIOSYNTHESIS_LACTO_AND_NEOLACTO_SERIES	KEGG_GLYCOSPHINGOLIPID_BIOSYNTHESIS_LACTO_AND_NEOLACTO_SERIES		10	-0.374023	-0.804493	0.712069	1	1	2146	tags=30%, list=16%, signal=36%	HeterovsU937	neg			GO_DENDRITIC_SPINE_MAINTENANCE	GO_DENDRITIC_SPINE_MAINTENANCE		16	-0.673872	-1.62635	0.0224913	0.326699	1	2603	tags=56%, list=19%, signal=70%	HeterovsU937	neg
KEGG_ALDOSTERONE_REGULATED_SODIUM_REABSORPTION	KEGG_ALDOSTERONE_REGULATED_SODIUM_REABSORPTION		23	-0.313275	-0.803188	0.742373	1	1	259	tags=9%, list=2%, signal=9%	HeterovsU937	neg			GO_REGULATION_OF_ACUTE_INFLAMMATORY_RESPONSE	GO_REGULATION_OF_ACUTE_INFLAMMATORY_RESPONSE		26	-0.596531	-1.61464	0.0214521	0.326793	1	2030	tags=42%, list=15%, signal=50%	HeterovsU937	neg
KEGG_APOPTOSIS	KEGG_APOPTOSIS		75	-0.24916	-0.793993	0.8	1	1	2355	tags=19%, list=17%, signal=22%	HeterovsU937	neg			GO_CELLULAR_RESPONSE_TO_MOLECULE_OF_BACTERIAL_ORIGIN	GO_CELLULAR_RESPONSE_TO_MOLECULE_OF_BACTERIAL_ORIGIN		127	-0.471954	-1.62993	0.00469484	0.32699	1	1803	tags=28%, list=13%, signal=32%	HeterovsU937	neg
KEGG_GLYCOSAMINOGLYCAN_BIOSYNTHESIS_CHONDROITIN_SULFATE	KEGG_GLYCOSAMINOGLYCAN_BIOSYNTHESIS_CHONDROITIN_SULFATE		17	-0.323199	-0.791266	0.732877	1	1	2153	tags=24%, list=16%, signal=28%	HeterovsU937	neg			GO_CYCLIC_NUCLEOTIDE_METABOLIC_PROCESS	GO_CYCLIC_NUCLEOTIDE_METABOLIC_PROCESS		19	-0.653591	-1.63315	0.0260417	0.327693	1	664	tags=32%, list=5%, signal=33%	HeterovsU937	neg
KEGG_HUNTINGTONS_DISEASE	KEGG_HUNTINGTONS_DISEASE		141	-0.225077	-0.785141	0.872964	1	1	3633	tags=23%, list=27%, signal=32%	HeterovsU937	neg			GO_LEUKOCYTE_CHEMOTAXIS	GO_LEUKOCYTE_CHEMOTAXIS	Details ...	109	-0.511544	-1.75012	0	0.297097	1	2030	tags=35%, list=15%, signal=41%	HeterovsU937	neg
KEGG_ENDOCYTOSIS	KEGG_ENDOCYTOSIS		144	-0.216632	-0.766903	0.915605	1	1	2749	tags=24%, list=20%, signal=29%	HeterovsU937	neg			GO_MESODERM_MORPHOGENESIS	GO_MESODERM_MORPHOGENESIS	Details ...	34	-0.697821	-1.6785	0.00126263	0.329142	1	1198	tags=26%, list=9%, signal=29%	HomovsHetero	neg
KEGG_MELANOMA	KEGG_MELANOMA		40	-0.262056	-0.759795	0.797342	1	1	2449	tags=18%, list=18%, signal=21%	HeterovsU937	neg			GO_NEGATIVE_REGULATION_OF_LEUKOCYTE_MEDIATED_CYTOTOXICITY	GO_NEGATIVE_REGULATION_OF_LEUKOCYTE_MEDIATED_CYTOTOXICITY		13	-0.717802	-1.63382	0.0208696	0.32929	1	1486	tags=46%, list=11%, signal=52%	HeterovsU937	neg
KEGG_GLYOXYLATE_AND_DICARBOXYLATE_METABOLISM	KEGG_GLYOXYLATE_AND_DICARBOXYLATE_METABOLISM		11	-0.342833	-0.75443	0.761062	1	1	1788	tags=18%, list=13%, signal=21%	HeterovsU937	neg			GO_PEPTIDYL_L_CYSTEINE_S_PALMITOYLATION	GO_PEPTIDYL_L_CYSTEINE_S_PALMITOYLATION		18	-0.655664	-1.62656	0.0167785	0.329299	1	556	tags=22%, list=4%, signal=23%	HeterovsU937	neg
KEGG_AMINO_SUGAR_AND_NUCLEOTIDE_SUGAR_METABOLISM	KEGG_AMINO_SUGAR_AND_NUCLEOTIDE_SUGAR_METABOLISM		36	-0.261666	-0.750002	0.803419	1	1	3198	tags=28%, list=24%, signal=36%	HeterovsU937	neg			GO_T_HELPER_1_TYPE_IMMUNE_RESPONSE	GO_T_HELPER_1_TYPE_IMMUNE_RESPONSE		25	-0.618845	-1.5952	0.0209424	0.329399	1	2806	tags=52%, list=21%, signal=65%	HeterovsU937	neg
KEGG_CYTOSOLIC_DNA_SENSING_PATHWAY	KEGG_CYTOSOLIC_DNA_SENSING_PATHWAY		31	-0.269593	-0.744105	0.833611	1	1	1371	tags=10%, list=10%, signal=11%	HeterovsU937	neg			GO_ACUTE_INFLAMMATORY_RESPONSE_TO_ANTIGENIC_STIMULUS	GO_ACUTE_INFLAMMATORY_RESPONSE_TO_ANTIGENIC_STIMULUS	Details ...	15	-0.750558	-1.81656	0.00173611	0.329669	0.996	3101	tags=80%, list=23%, signal=104%	HeterovsU937	neg
KEGG_ONE_CARBON_POOL_BY_FOLATE	KEGG_ONE_CARBON_POOL_BY_FOLATE		15	-0.318872	-0.743992	0.787611	1	1	1788	tags=20%, list=13%, signal=23%	HeterovsU937	neg			GO_LUNG_EPITHELIUM_DEVELOPMENT	GO_LUNG_EPITHELIUM_DEVELOPMENT	Details ...	18	0.802778	2.0308	0	0.221033	0.304	302	tags=22%, list=2%, signal=23%	HeterovsU937	pos
KEGG_ANTIGEN_PROCESSING_AND_PRESENTATION	KEGG_ANTIGEN_PROCESSING_AND_PRESENTATION		36	-0.256548	-0.741855	0.822581	1	1	3860	tags=39%, list=28%, signal=54%	HeterovsU937	neg			GO_NEGATIVE_REGULATION_OF_INTERLEUKIN_1_PRODUCTION	GO_NEGATIVE_REGULATION_OF_INTERLEUKIN_1_PRODUCTION		15	-0.668572	-1.59584	0.0273038	0.330427	1	1337	tags=40%, list=10%, signal=44%	HeterovsU937	neg
KEGG_NATURAL_KILLER_CELL_MEDIATED_CYTOTOXICITY	KEGG_NATURAL_KILLER_CELL_MEDIATED_CYTOTOXICITY		80	-0.225159	-0.736633	0.885382	1	1	3145	tags=29%, list=23%, signal=37%	HeterovsU937	neg			GO_RESPONSE_TO_PH	GO_RESPONSE_TO_PH		24	-0.623285	-1.59642	0.0270728	0.331356	1	1822	tags=25%, list=13%, signal=29%	HeterovsU937	neg
KEGG_PENTOSE_PHOSPHATE_PATHWAY	KEGG_PENTOSE_PHOSPHATE_PATHWAY		17	-0.295633	-0.72908	0.814626	1	1	3115	tags=24%, list=23%, signal=30%	HeterovsU937	neg			GO_PHOTOTRANSDUCTION_VISIBLE_LIGHT	GO_PHOTOTRANSDUCTION_VISIBLE_LIGHT		17	-0.651371	-1.59343	0.0337478	0.331755	1	1879	tags=35%, list=14%, signal=41%	HeterovsU937	neg
KEGG_TYPE_II_DIABETES_MELLITUS	KEGG_TYPE_II_DIABETES_MELLITUS		32	-0.255835	-0.714808	0.853933	1	1	815	tags=9%, list=6%, signal=10%	HeterovsU937	neg			GO_DETECTION_OF_STIMULUS_INVOLVED_IN_SENSORY_PERCEPTION	GO_DETECTION_OF_STIMULUS_INVOLVED_IN_SENSORY_PERCEPTION	Details ...	35	-0.689755	-1.68388	0.00243605	0.332596	1	1292	tags=34%, list=10%, signal=38%	HomovsHetero	neg
KEGG_ERBB_SIGNALING_PATHWAY	KEGG_ERBB_SIGNALING_PATHWAY		67	-0.229089	-0.713979	0.897858	1	1	2857	tags=21%, list=21%, signal=26%	HeterovsU937	neg			GO_BLOOD_VESSEL_REMODELING	GO_BLOOD_VESSEL_REMODELING	Details ...	22	-0.683806	-1.78838	0.00501672	0.332667	0.999	1332	tags=36%, list=10%, signal=40%	HeterovsU937	neg
KEGG_PHOSPHATIDYLINOSITOL_SIGNALING_SYSTEM	KEGG_PHOSPHATIDYLINOSITOL_SIGNALING_SYSTEM		64	-0.228577	-0.711902	0.909984	1	1	2791	tags=19%, list=21%, signal=23%	HeterovsU937	neg			GO_CELL_KILLING	GO_CELL_KILLING		80	-0.494086	-1.59964	0.00500835	0.332893	1	2323	tags=31%, list=17%, signal=37%	HeterovsU937	neg
KEGG_DORSO_VENTRAL_AXIS_FORMATION	KEGG_DORSO_VENTRAL_AXIS_FORMATION		14	-0.297996	-0.707732	0.84456	1	1	2709	tags=21%, list=20%, signal=27%	HeterovsU937	neg			GO_VITAMIN_BIOSYNTHETIC_PROCESS	GO_VITAMIN_BIOSYNTHETIC_PROCESS		16	-0.66812	-1.59664	0.0324786	0.333218	1	1371	tags=31%, list=10%, signal=35%	HeterovsU937	neg
KEGG_BUTANOATE_METABOLISM	KEGG_BUTANOATE_METABOLISM		25	-0.272526	-0.703009	0.867491	1	1	2257	tags=24%, list=17%, signal=29%	HeterovsU937	neg			GO_MESENCHYMAL_CELL_PROLIFERATION	GO_MESENCHYMAL_CELL_PROLIFERATION	Details ...	23	0.764223	2.01126	0	0.207702	0.4	302	tags=22%, list=2%, signal=22%	HeterovsU937	pos
KEGG_GLUTATHIONE_METABOLISM	KEGG_GLUTATHIONE_METABOLISM		32	-0.251176	-0.673736	0.909244	1	1	4098	tags=38%, list=30%, signal=54%	HeterovsU937	neg			GO_FAT_SOLUBLE_VITAMIN_METABOLIC_PROCESS	GO_FAT_SOLUBLE_VITAMIN_METABOLIC_PROCESS		19	-0.644222	-1.59844	0.0292599	0.333708	1	1490	tags=32%, list=11%, signal=35%	HeterovsU937	neg
KEGG_SNARE_INTERACTIONS_IN_VESICULAR_TRANSPORT	KEGG_SNARE_INTERACTIONS_IN_VESICULAR_TRANSPORT		30	-0.244901	-0.664213	0.915702	1	1	4264	tags=33%, list=31%, signal=48%	HeterovsU937	neg			GO_CELLULAR_RESPONSE_TO_BIOTIC_STIMULUS	GO_CELLULAR_RESPONSE_TO_BIOTIC_STIMULUS		143	-0.45246	-1.60039	0.00159236	0.33372	1	2107	tags=29%, list=16%, signal=34%	HeterovsU937	neg
KEGG_REGULATION_OF_AUTOPHAGY	KEGG_REGULATION_OF_AUTOPHAGY		15	-0.273295	-0.647809	0.892919	1	1	1088	tags=13%, list=8%, signal=14%	HeterovsU937	neg			GO_NEGATIVE_REGULATION_OF_CELL_KILLING	GO_NEGATIVE_REGULATION_OF_CELL_KILLING		14	-0.68652	-1.59139	0.0290598	0.334653	1	1486	tags=43%, list=11%, signal=48%	HeterovsU937	neg
KEGG_PEROXISOME	KEGG_PEROXISOME		58	-0.196108	-0.597635	0.991708	1	1	2941	tags=21%, list=22%, signal=26%	HeterovsU937	neg			GO_POSITIVE_REGULATION_OF_PHAGOCYTOSIS	GO_POSITIVE_REGULATION_OF_PHAGOCYTOSIS		43	-0.54928	-1.59028	0.0178571	0.335215	1	673	tags=16%, list=5%, signal=17%	HeterovsU937	neg
KEGG_MTOR_SIGNALING_PATHWAY	KEGG_MTOR_SIGNALING_PATHWAY		43	-0.20391	-0.588171	0.979661	1	1	3143	tags=21%, list=23%, signal=27%	HeterovsU937	neg			GO_LUNG_EPITHELIUM_DEVELOPMENT	GO_LUNG_EPITHELIUM_DEVELOPMENT	Details ...	18	-0.78258	-1.68562	0.00409836	0.33534	1	449	tags=17%, list=3%, signal=17%	HomovsHetero	neg
KEGG_GLIOMA	KEGG_GLIOMA		50	-0.194958	-0.586201	0.975649	1	1	2857	tags=18%, list=21%, signal=23%	HeterovsU937	neg			GO_ZYMOGEN_ACTIVATION	GO_ZYMOGEN_ACTIVATION		26	-0.602055	-1.59671	0.040747	0.335587	1	2158	tags=46%, list=16%, signal=55%	HeterovsU937	neg
KEGG_GLYCOSYLPHOSPHATIDYLINOSITOL_GPI_ANCHOR_BIOSYNTHESIS	KEGG_GLYCOSYLPHOSPHATIDYLINOSITOL_GPI_ANCHOR_BIOSYNTHESIS		19	-0.229673	-0.573695	0.960854	1	1	2356	tags=21%, list=17%, signal=25%	HeterovsU937	neg			GO_NEGATIVE_REGULATION_OF_LYMPHOCYTE_ACTIVATION	GO_NEGATIVE_REGULATION_OF_LYMPHOCYTE_ACTIVATION		91	-0.472097	-1.57382	0.010989	0.33654	1	3088	tags=37%, list=23%, signal=48%	HeterovsU937	neg
KEGG_PROTEIN_EXPORT	KEGG_PROTEIN_EXPORT		23	-0.215503	-0.558367	0.96995	1	1	10661	tags=100%, list=78%, signal=464%	HeterovsU937	neg			GO_MAINTENANCE_OF_LOCATION_IN_CELL	GO_MAINTENANCE_OF_LOCATION_IN_CELL		131	-0.458618	-1.5799	0.00304878	0.336611	1	1905	tags=21%, list=14%, signal=25%	HeterovsU937	neg
KEGG_CIRCADIAN_RHYTHM_MAMMAL	KEGG_CIRCADIAN_RHYTHM_MAMMAL		12	-0.222006	-0.497042	0.968804	1	1	4064	tags=33%, list=30%, signal=48%	HeterovsU937	neg			GO_REGULATION_OF_T_CELL_MEDIATED_CYTOTOXICITY	GO_REGULATION_OF_T_CELL_MEDIATED_CYTOTOXICITY	Details ...	19	-0.721952	-1.80974	0.0102564	0.336994	0.997	1310	tags=37%, list=10%, signal=41%	HeterovsU937	neg
KEGG_AMINOACYL_TRNA_BIOSYNTHESIS	KEGG_AMINOACYL_TRNA_BIOSYNTHESIS		18	-0.189474	-0.467205	0.989529	1	1	2932	tags=22%, list=22%, signal=28%	HeterovsU937	neg			GO_GRANULOCYTE_CHEMOTAXIS	GO_GRANULOCYTE_CHEMOTAXIS	Details ...	57	-0.582095	-1.79573	0.0033389	0.337146	0.999	2030	tags=39%, list=15%, signal=45%	HeterovsU937	neg
KEGG_VIBRIO_CHOLERAE_INFECTION	KEGG_VIBRIO_CHOLERAE_INFECTION		39	-0.159553	-0.459599	0.9936	1	1	4179	tags=28%, list=31%, signal=41%	HeterovsU937	neg			GO_REGULATION_OF_MYELOID_LEUKOCYTE_MEDIATED_IMMUNITY	GO_REGULATION_OF_MYELOID_LEUKOCYTE_MEDIATED_IMMUNITY		44	-0.531379	-1.57412	0.0224525	0.338025	1	3145	tags=43%, list=23%, signal=56%	HeterovsU937	neg
KEGG_THYROID_CANCER	KEGG_THYROID_CANCER		24	-0.159203	-0.421412	0.996546	1	1	2120	tags=13%, list=16%, signal=15%	HeterovsU937	neg			GO_REGULATION_OF_NEUTROPHIL_MIGRATION	GO_REGULATION_OF_NEUTROPHIL_MIGRATION		28	-0.571331	-1.57819	0.0226087	0.338532	1	1735	tags=39%, list=13%, signal=45%	HeterovsU937	neg
KEGG_BIOSYNTHESIS_OF_UNSATURATED_FATTY_ACIDS	KEGG_BIOSYNTHESIS_OF_UNSATURATED_FATTY_ACIDS		13	-0.163763	-0.372649	0.998224	0.999579	1	3966	tags=31%, list=29%, signal=43%	HeterovsU937	neg			GO_POSITIVE_REGULATION_OF_ACUTE_INFLAMMATORY_RESPONSE	GO_POSITIVE_REGULATION_OF_ACUTE_INFLAMMATORY_RESPONSE		17	-0.647174	-1.58	0.0310881	0.33867	1	2708	tags=65%, list=20%, signal=81%	HeterovsU937	neg
KEGG_ARACHIDONIC_ACID_METABOLISM	KEGG_ARACHIDONIC_ACID_METABOLISM	Details ...	18	0.506328	1.47705	0.0657439	1	0.832	2194	tags=39%, list=16%, signal=46%	HomovsU937	pos			GO_POSITIVE_REGULATION_OF_PHAGOCYTOSIS_ENGULFMENT	GO_POSITIVE_REGULATION_OF_PHAGOCYTOSIS_ENGULFMENT		10	-0.734428	-1.57465	0.0462633	0.338798	1	673	tags=30%, list=5%, signal=32%	HeterovsU937	neg
KEGG_MISMATCH_REPAIR	KEGG_MISMATCH_REPAIR	Details ...	21	0.492138	1.46359	0.0872727	1	0.848	4310	tags=71%, list=32%, signal=104%	HomovsU937	pos			GO_DETECTION_OF_VISIBLE_LIGHT	GO_DETECTION_OF_VISIBLE_LIGHT		27	-0.593484	-1.57479	0.0332779	0.340672	1	2079	tags=33%, list=15%, signal=39%	HeterovsU937	neg
KEGG_NON_SMALL_CELL_LUNG_CANCER	KEGG_NON_SMALL_CELL_LUNG_CANCER	Details ...	48	0.386867	1.36097	0.0970149	1	0.956	4323	tags=56%, list=32%, signal=82%	HomovsU937	pos			GO_COAGULATION	GO_COAGULATION		195	-0.423621	-1.57139	0.0045045	0.340776	1	2086	tags=23%, list=15%, signal=26%	HeterovsU937	neg
KEGG_COLORECTAL_CANCER	KEGG_COLORECTAL_CANCER	Details ...	57	0.349423	1.31505	0.0901639	1	0.982	3383	tags=47%, list=25%, signal=63%	HomovsU937	pos			GO_PLATELET_DERIVED_GROWTH_FACTOR_RECEPTOR_BETA_SIGNALING_PATHWAY	GO_PLATELET_DERIVED_GROWTH_FACTOR_RECEPTOR_BETA_SIGNALING_PATHWAY		10	-0.730322	-1.58006	0.029877	0.340861	1	1392	tags=40%, list=10%, signal=45%	HeterovsU937	neg
KEGG_NATURAL_KILLER_CELL_MEDIATED_CYTOTOXICITY	KEGG_NATURAL_KILLER_CELL_MEDIATED_CYTOTOXICITY	Details ...	80	0.31838	1.26641	0.0792079	1	0.993	2060	tags=29%, list=15%, signal=34%	HomovsU937	pos			GO_VASCULAR_ENDOTHELIAL_CELL_PROLIFERATION	GO_VASCULAR_ENDOTHELIAL_CELL_PROLIFERATION		16	-0.666955	-1.5755	0.0330033	0.341085	1	1621	tags=31%, list=12%, signal=35%	HeterovsU937	neg
KEGG_TOLL_LIKE_RECEPTOR_SIGNALING_PATHWAY	KEGG_TOLL_LIKE_RECEPTOR_SIGNALING_PATHWAY	Details ...	63	0.326463	1.21193	0.149123	1	0.997	1650	tags=19%, list=12%, signal=22%	HomovsU937	pos			GO_REGULATION_OF_CALCIUM_ION_TRANSMEMBRANE_TRANSPORTER_ACTIVITY	GO_REGULATION_OF_CALCIUM_ION_TRANSMEMBRANE_TRANSPORTER_ACTIVITY		48	-0.517437	-1.58046	0.0134003	0.342171	1	2445	tags=33%, list=18%, signal=41%	HeterovsU937	neg
KEGG_P53_SIGNALING_PATHWAY	KEGG_P53_SIGNALING_PATHWAY	Details ...	53	0.337338	1.21022	0.146667	1	0.997	2552	tags=34%, list=19%, signal=42%	HomovsU937	pos			GO_NLRP3_INFLAMMASOME_COMPLEX_ASSEMBLY	GO_NLRP3_INFLAMMASOME_COMPLEX_ASSEMBLY	Details ...	13	-0.775727	-1.79012	0.010327	0.342266	0.999	915	tags=31%, list=7%, signal=33%	HeterovsU937	neg
KEGG_MELANOGENESIS	KEGG_MELANOGENESIS	Details ...	61	0.322727	1.18107	0.191667	1	0.998	1752	tags=20%, list=13%, signal=22%	HomovsU937	pos			GO_NEGATIVE_REGULATION_OF_INTERLEUKIN_10_PRODUCTION	GO_NEGATIVE_REGULATION_OF_INTERLEUKIN_10_PRODUCTION		12	-0.688218	-1.57575	0.0333919	0.342673	1	2570	tags=67%, list=19%, signal=82%	HeterovsU937	neg
KEGG_AMYOTROPHIC_LATERAL_SCLEROSIS_ALS	KEGG_AMYOTROPHIC_LATERAL_SCLEROSIS_ALS	Details ...	39	0.323217	1.14971	0.233129	1	0.999	1443	tags=23%, list=11%, signal=26%	HomovsU937	pos			GO_POSITIVE_REGULATION_OF_MYELOID_LEUKOCYTE_CYTOKINE_PRODUCTION_INVOLVED_IN_IMMUNE_RESPONSE	GO_POSITIVE_REGULATION_OF_MYELOID_LEUKOCYTE_CYTOKINE_PRODUCTION_INVOLVED_IN_IMMUNE_RESPONSE		14	-0.681004	-1.58647	0.0278746	0.342747	1	2030	tags=29%, list=15%, signal=34%	HeterovsU937	neg
KEGG_DNA_REPLICATION	KEGG_DNA_REPLICATION	Details ...	30	0.321201	1.048	0.382353	1	1	4739	tags=63%, list=35%, signal=97%	HomovsU937	pos			GO_ENDOTHELIAL_CELL_DEVELOPMENT	GO_ENDOTHELIAL_CELL_DEVELOPMENT		45	-0.523543	-1.58177	0.0217755	0.343548	1	1473	tags=27%, list=11%, signal=30%	HeterovsU937	neg
KEGG_PROSTATE_CANCER	KEGG_PROSTATE_CANCER	Details ...	71	0.264554	1.04226	0.393162	1	1	2074	tags=25%, list=15%, signal=30%	HomovsU937	pos			GO_POSITIVE_REGULATION_OF_LEUKOCYTE_CHEMOTAXIS	GO_POSITIVE_REGULATION_OF_LEUKOCYTE_CHEMOTAXIS		47	-0.534352	-1.58078	0.0233723	0.343675	1	3145	tags=38%, list=23%, signal=50%	HeterovsU937	neg
KEGG_NEUROTROPHIN_SIGNALING_PATHWAY	KEGG_NEUROTROPHIN_SIGNALING_PATHWAY	Details ...	106	0.245877	1.03665	0.385714	1	1	2304	tags=24%, list=17%, signal=28%	HomovsU937	pos			GO_RIBONUCLEOTIDE_CATABOLIC_PROCESS	GO_RIBONUCLEOTIDE_CATABOLIC_PROCESS		22	-0.606714	-1.56902	0.0395683	0.344647	1	2427	tags=45%, list=18%, signal=55%	HeterovsU937	neg
KEGG_CELL_CYCLE	KEGG_CELL_CYCLE	Details ...	113	0.240439	1.02282	0.483871	1	1	4203	tags=42%, list=31%, signal=61%	HomovsU937	pos			GO_RESPONSE_TO_MUSCLE_ACTIVITY	GO_RESPONSE_TO_MUSCLE_ACTIVITY	Details ...	14	-0.758724	-1.79823	0.0106572	0.344878	0.998	1245	tags=36%, list=9%, signal=39%	HeterovsU937	neg
KEGG_INSULIN_SIGNALING_PATHWAY	KEGG_INSULIN_SIGNALING_PATHWAY	Details ...	105	0.229952	0.952206	0.583333	1	1	3912	tags=43%, list=29%, signal=60%	HomovsU937	pos			GO_RESPONSE_TO_REDOX_STATE	GO_RESPONSE_TO_REDOX_STATE	Details ...	11	-0.803409	-1.80273	0.00357143	0.345205	0.997	1702	tags=36%, list=13%, signal=42%	HeterovsU937	neg
KEGG_TERPENOID_BACKBONE_BIOSYNTHESIS	KEGG_TERPENOID_BACKBONE_BIOSYNTHESIS	Details ...	12	0.378547	0.947238	0.552632	1	1	3821	tags=50%, list=28%, signal=70%	HomovsU937	pos			GO_SUPEROXIDE_METABOLIC_PROCESS	GO_SUPEROXIDE_METABOLIC_PROCESS		43	-0.532069	-1.56792	0.0322004	0.345467	1	597	tags=19%, list=4%, signal=19%	HeterovsU937	neg
KEGG_OOCYTE_MEIOSIS	KEGG_OOCYTE_MEIOSIS	Details ...	85	0.231727	0.946069	0.522727	1	1	4371	tags=40%, list=32%, signal=59%	HomovsU937	pos			GO_POSITIVE_REGULATION_OF_HEART_RATE	GO_POSITIVE_REGULATION_OF_HEART_RATE		12	-0.687655	-1.58181	0.0244328	0.345852	1	5	tags=8%, list=0%, signal=8%	HeterovsU937	neg
KEGG_SMALL_CELL_LUNG_CANCER	KEGG_SMALL_CELL_LUNG_CANCER	Details ...	66	0.250976	0.942242	0.619048	1	1	1786	tags=24%, list=13%, signal=28%	HomovsU937	pos			GO_RESPONSE_TO_RETINOIC_ACID	GO_RESPONSE_TO_RETINOIC_ACID	Details ...	60	-0.653463	-1.68578	0.00111857	0.346765	1	739	tags=17%, list=5%, signal=18%	HomovsHetero	neg
KEGG_TYPE_II_DIABETES_MELLITUS	KEGG_TYPE_II_DIABETES_MELLITUS	Details ...	32	0.289449	0.939586	0.564516	1	1	2938	tags=38%, list=22%, signal=48%	HomovsU937	pos			GO_OLFACTORY_LOBE_DEVELOPMENT	GO_OLFACTORY_LOBE_DEVELOPMENT		14	-0.6758	-1.58402	0.0308219	0.346966	1	2074	tags=50%, list=15%, signal=59%	HeterovsU937	neg
KEGG_HOMOLOGOUS_RECOMBINATION	KEGG_HOMOLOGOUS_RECOMBINATION	Details ...	23	0.297198	0.914639	0.544681	1	1	4310	tags=52%, list=32%, signal=76%	HomovsU937	pos			GO_REGULATION_OF_CD4_POSITIVE_ALPHA_BETA_T_CELL_DIFFERENTIATION	GO_REGULATION_OF_CD4_POSITIVE_ALPHA_BETA_T_CELL_DIFFERENTIATION		32	-0.576435	-1.58309	0.0219595	0.346994	1	2604	tags=31%, list=19%, signal=39%	HeterovsU937	neg
KEGG_FC_EPSILON_RI_SIGNALING_PATHWAY	KEGG_FC_EPSILON_RI_SIGNALING_PATHWAY	Details ...	59	0.236112	0.90734	0.639344	1	1	3298	tags=36%, list=24%, signal=47%	HomovsU937	pos			GO_REGULATION_OF_LYMPHOCYTE_CHEMOTAXIS	GO_REGULATION_OF_LYMPHOCYTE_CHEMOTAXIS		11	-0.701675	-1.58216	0.0408526	0.347276	1	1996	tags=36%, list=15%, signal=43%	HeterovsU937	neg
KEGG_ENDOMETRIAL_CANCER	KEGG_ENDOMETRIAL_CANCER	Details ...	46	0.249978	0.886525	0.660256	1	1	4232	tags=48%, list=31%, signal=69%	HomovsU937	pos			GO_MESENCHYMAL_CELL_PROLIFERATION	GO_MESENCHYMAL_CELL_PROLIFERATION	Details ...	23	0.584003	1.77589	0	0.519607	0.999	549	tags=26%, list=4%, signal=27%	HomovsU937	pos
KEGG_ETHER_LIPID_METABOLISM	KEGG_ETHER_LIPID_METABOLISM	Details ...	19	0.303369	0.877096	0.621993	1	1	3680	tags=47%, list=27%, signal=65%	HomovsU937	pos			GO_T_CELL_MEDIATED_CYTOTOXICITY	GO_T_CELL_MEDIATED_CYTOTOXICITY	Details ...	26	-0.683249	-1.81763	0.00169492	0.348435	0.996	1753	tags=42%, list=13%, signal=48%	HeterovsU937	neg
KEGG_CHRONIC_MYELOID_LEUKEMIA	KEGG_CHRONIC_MYELOID_LEUKEMIA	Details ...	67	0.230598	0.876631	0.747748	1	1	3912	tags=42%, list=29%, signal=58%	HomovsU937	pos			GO_REGULATION_OF_COAGULATION	GO_REGULATION_OF_COAGULATION		45	-0.542799	-1.55992	0.022293	0.348541	1	2030	tags=36%, list=15%, signal=42%	HeterovsU937	neg
KEGG_FC_GAMMA_R_MEDIATED_PHAGOCYTOSIS	KEGG_FC_GAMMA_R_MEDIATED_PHAGOCYTOSIS	Details ...	79	0.218008	0.874627	0.722772	1	1	2938	tags=30%, list=22%, signal=39%	HomovsU937	pos			GO_INTERLEUKIN_4_PRODUCTION	GO_INTERLEUKIN_4_PRODUCTION		24	-0.601044	-1.55719	0.0315091	0.34917	1	3231	tags=58%, list=24%, signal=76%	HeterovsU937	neg
KEGG_APOPTOSIS	KEGG_APOPTOSIS	Details ...	75	0.220484	0.869878	0.700935	1	1	2552	tags=25%, list=19%, signal=31%	HomovsU937	pos			GO_POSITIVE_REGULATION_OF_CALCIUM_ION_TRANSMEMBRANE_TRANSPORT	GO_POSITIVE_REGULATION_OF_CALCIUM_ION_TRANSMEMBRANE_TRANSPORT		33	-0.561112	-1.5656	0.023511	0.349208	1	1384	tags=21%, list=10%, signal=24%	HeterovsU937	neg
KEGG_SPLICEOSOME	KEGG_SPLICEOSOME	Details ...	113	0.197778	0.866367	0.785714	1	1	4949	tags=44%, list=36%, signal=69%	HomovsU937	pos			GO_CHLORIDE_TRANSPORT	GO_CHLORIDE_TRANSPORT		45	-0.522238	-1.56039	0.0262295	0.349401	1	1763	tags=29%, list=13%, signal=33%	HeterovsU937	neg
KEGG_VEGF_SIGNALING_PATHWAY	KEGG_VEGF_SIGNALING_PATHWAY	Details ...	57	0.229991	0.865519	0.738806	1	1	1992	tags=26%, list=15%, signal=31%	HomovsU937	pos			GO_MESONEPHROS_DEVELOPMENT	GO_MESONEPHROS_DEVELOPMENT	Details ...	50	-0.681784	-1.72815	0	0.330118	0.992	600	tags=18%, list=4%, signal=19%	HomovsHetero	neg
KEGG_N_GLYCAN_BIOSYNTHESIS	KEGG_N_GLYCAN_BIOSYNTHESIS	Details ...	38	0.252329	0.854982	0.689119	1	1	2171	tags=18%, list=16%, signal=22%	HomovsU937	pos			GO_REGULATION_OF_T_CELL_MEDIATED_IMMUNITY	GO_REGULATION_OF_T_CELL_MEDIATED_IMMUNITY		44	-0.532308	-1.55469	0.0301003	0.349646	1	1310	tags=27%, list=10%, signal=30%	HeterovsU937	neg
KEGG_STARCH_AND_SUCROSE_METABOLISM	KEGG_STARCH_AND_SUCROSE_METABOLISM	Details ...	20	0.294286	0.840923	0.658915	1	1	2206	tags=25%, list=16%, signal=30%	HomovsU937	pos			GO_CALCIUM_ION_TRANSMEMBRANE_IMPORT_INTO_CYTOSOL	GO_CALCIUM_ION_TRANSMEMBRANE_IMPORT_INTO_CYTOSOL		68	-0.494073	-1.55766	0.00660066	0.350047	1	1384	tags=22%, list=10%, signal=24%	HeterovsU937	neg
KEGG_CIRCADIAN_RHYTHM_MAMMAL	KEGG_CIRCADIAN_RHYTHM_MAMMAL	Details ...	12	0.331605	0.838983	0.667712	1	1	5009	tags=50%, list=37%, signal=79%	HomovsU937	pos			GO_POSITIVE_REGULATION_OF_BLOOD_PRESSURE	GO_POSITIVE_REGULATION_OF_BLOOD_PRESSURE		13	-0.661155	-1.55527	0.0479574	0.35009	1	1798	tags=38%, list=13%, signal=44%	HeterovsU937	neg
KEGG_GLYCOSPHINGOLIPID_BIOSYNTHESIS_LACTO_AND_NEOLACTO_SERIES	KEGG_GLYCOSPHINGOLIPID_BIOSYNTHESIS_LACTO_AND_NEOLACTO_SERIES	Details ...	10	0.345307	0.824656	0.682779	1	1	2893	tags=30%, list=21%, signal=38%	HomovsU937	pos			GO_RESPONSE_TO_INTERFERON_BETA	GO_RESPONSE_TO_INTERFERON_BETA		19	-0.608769	-1.55562	0.0455285	0.351109	1	2116	tags=42%, list=16%, signal=50%	HeterovsU937	neg
KEGG_GLIOMA	KEGG_GLIOMA	Details ...	50	0.215515	0.798332	0.84106	1	1	3511	tags=42%, list=26%, signal=56%	HomovsU937	pos			GO_REGULATION_OF_BLOOD_PRESSURE	GO_REGULATION_OF_BLOOD_PRESSURE		89	-0.470511	-1.56042	0.00633914	0.351444	1	2090	tags=34%, list=15%, signal=40%	HeterovsU937	neg
KEGG_PYRIMIDINE_METABOLISM	KEGG_PYRIMIDINE_METABOLISM	Details ...	86	0.195399	0.791734	0.873684	1	1	1628	tags=13%, list=12%, signal=14%	HomovsU937	pos			GO_POSITIVE_REGULATION_OF_CELL_CELL_ADHESION	GO_POSITIVE_REGULATION_OF_CELL_CELL_ADHESION		170	-0.435176	-1.55775	0.00312012	0.351948	1	1551	tags=21%, list=11%, signal=23%	HeterovsU937	neg
KEGG_ACUTE_MYELOID_LEUKEMIA	KEGG_ACUTE_MYELOID_LEUKEMIA	Details ...	54	0.212402	0.773416	0.838461	1	1	1650	tags=19%, list=12%, signal=21%	HomovsU937	pos			GO_NEGATIVE_REGULATION_OF_LEUKOCYTE_PROLIFERATION	GO_NEGATIVE_REGULATION_OF_LEUKOCYTE_PROLIFERATION		50	-0.522698	-1.56096	0.0225806	0.352131	1	1939	tags=34%, list=14%, signal=40%	HeterovsU937	neg
KEGG_ERBB_SIGNALING_PATHWAY	KEGG_ERBB_SIGNALING_PATHWAY	Details ...	67	0.197015	0.752893	0.893443	1	1	3912	tags=39%, list=29%, signal=54%	HomovsU937	pos			GO_NEGATIVE_REGULATION_OF_NF_KAPPAB_TRANSCRIPTION_FACTOR_ACTIVITY	GO_NEGATIVE_REGULATION_OF_NF_KAPPAB_TRANSCRIPTION_FACTOR_ACTIVITY		61	-0.494224	-1.56124	0.0204724	0.353531	1	1641	tags=23%, list=12%, signal=26%	HeterovsU937	neg
KEGG_DORSO_VENTRAL_AXIS_FORMATION	KEGG_DORSO_VENTRAL_AXIS_FORMATION	Details ...	14	0.271687	0.745209	0.782895	1	1	4232	tags=43%, list=31%, signal=62%	HomovsU937	pos			GO_REGULATION_OF_DENDRITIC_SPINE_MORPHOGENESIS	GO_REGULATION_OF_DENDRITIC_SPINE_MORPHOGENESIS		34	-0.547639	-1.5523	0.0317195	0.353699	1	2603	tags=41%, list=19%, signal=51%	HeterovsU937	neg
KEGG_VIBRIO_CHOLERAE_INFECTION	KEGG_VIBRIO_CHOLERAE_INFECTION	Details ...	39	0.214855	0.741163	0.86076	1	1	3182	tags=28%, list=23%, signal=37%	HomovsU937	pos			GO_MODIFICATION_OF_POSTSYNAPTIC_STRUCTURE	GO_MODIFICATION_OF_POSTSYNAPTIC_STRUCTURE	Details ...	13	-0.867987	-1.88035	0	0.147105	0.286	413	tags=31%, list=3%, signal=32%	HomovsU937	neg
KEGG_T_CELL_RECEPTOR_SIGNALING_PATHWAY	KEGG_T_CELL_RECEPTOR_SIGNALING_PATHWAY	Details ...	79	0.184234	0.738697	0.988889	1	1	2730	tags=22%, list=20%, signal=27%	HomovsU937	pos			GO_PEPTIDYL_TYROSINE_AUTOPHOSPHORYLATION	GO_PEPTIDYL_TYROSINE_AUTOPHOSPHORYLATION		25	-0.594874	-1.56214	0.047138	0.355552	1	1325	tags=32%, list=10%, signal=35%	HeterovsU937	neg
KEGG_BASE_EXCISION_REPAIR	KEGG_BASE_EXCISION_REPAIR	Details ...	29	0.226545	0.723535	0.870192	1	1	4868	tags=62%, list=36%, signal=97%	HomovsU937	pos			GO_PROTEIN_ACTIVATION_CASCADE	GO_PROTEIN_ACTIVATION_CASCADE		11	-0.693985	-1.55073	0.044293	0.355756	1	2086	tags=73%, list=15%, signal=86%	HeterovsU937	neg
KEGG_PENTOSE_PHOSPHATE_PATHWAY	KEGG_PENTOSE_PHOSPHATE_PATHWAY	Details ...	17	0.249019	0.710358	0.842105	1	1	3267	tags=35%, list=24%, signal=46%	HomovsU937	pos			GO_REGULATION_OF_POSTSYNAPSE_ORGANIZATION	GO_REGULATION_OF_POSTSYNAPSE_ORGANIZATION	Details ...	66	-0.602368	-1.67981	0.00459242	0.356719	1	1985	tags=36%, list=15%, signal=42%	HomovsU937	neg
KEGG_PROGESTERONE_MEDIATED_OOCYTE_MATURATION	KEGG_PROGESTERONE_MEDIATED_OOCYTE_MATURATION	Details ...	68	0.181598	0.707739	0.965517	1	1	4232	tags=41%, list=31%, signal=60%	HomovsU937	pos			GO_MODIFICATION_OF_SYNAPTIC_STRUCTURE	GO_MODIFICATION_OF_SYNAPTIC_STRUCTURE	Details ...	17	-0.841946	-1.77893	0	0.271101	0.832	331	tags=24%, list=2%, signal=24%	HomovsHetero	neg
KEGG_RNA_POLYMERASE	KEGG_RNA_POLYMERASE	Details ...	28	0.218394	0.703488	0.860465	1	1	4355	tags=50%, list=32%, signal=73%	HomovsU937	pos			GO_POSTSYNAPTIC_SPECIALIZATION_ORGANIZATION	GO_POSTSYNAPTIC_SPECIALIZATION_ORGANIZATION	Details ...	19	-0.758729	-1.68579	0.0083682	0.359995	1	795	tags=32%, list=6%, signal=33%	HomovsHetero	neg
KEGG_BIOSYNTHESIS_OF_UNSATURATED_FATTY_ACIDS	KEGG_BIOSYNTHESIS_OF_UNSATURATED_FATTY_ACIDS	Details ...	13	0.268238	0.69128	0.853968	1	1	1774	tags=23%, list=13%, signal=27%	HomovsU937	pos			GO_ALDEHYDE_BIOSYNTHETIC_PROCESS	GO_ALDEHYDE_BIOSYNTHETIC_PROCESS	Details ...	10	0.766151	1.94363	0.0057971	0.360622	0.835	756	tags=30%, list=6%, signal=32%	HomovsU937	pos
KEGG_REGULATION_OF_AUTOPHAGY	KEGG_REGULATION_OF_AUTOPHAGY	Details ...	15	0.242898	0.671071	0.851974	1	1	4091	tags=47%, list=30%, signal=67%	HomovsU937	pos			GO_POSITIVE_REGULATION_OF_LYMPHOCYTE_MEDIATED_IMMUNITY	GO_POSITIVE_REGULATION_OF_LYMPHOCYTE_MEDIATED_IMMUNITY		66	-0.48841	-1.54693	0.014658	0.36344	1	1476	tags=23%, list=11%, signal=25%	HeterovsU937	neg
KEGG_SNARE_INTERACTIONS_IN_VESICULAR_TRANSPORT	KEGG_SNARE_INTERACTIONS_IN_VESICULAR_TRANSPORT	Details ...	30	0.196632	0.635722	0.969388	1	1	3149	tags=30%, list=23%, signal=39%	HomovsU937	pos			GO_POSITIVE_REGULATION_OF_CYTOSOLIC_CALCIUM_ION_CONCENTRATION_INVOLVED_IN_PHOSPHOLIPASE_C_ACTIVATING_G_PROTEIN_COUPLED_SIGNALING_PATHWAY	GO_POSITIVE_REGULATION_OF_CYTOSOLIC_CALCIUM_ION_CONCENTRATION_INVOLVED_IN_PHOSPHOLIPASE_C_ACTIVATING_G_PROTEIN_COUPLED_SIGNALING_PATHWAY		12	-0.671184	-1.5458	0.0568966	0.364438	1	2762	tags=67%, list=20%, signal=84%	HeterovsU937	neg
KEGG_SPHINGOLIPID_METABOLISM	KEGG_SPHINGOLIPID_METABOLISM	Details ...	28	0.182453	0.59403	0.980861	1	1	1605	tags=18%, list=12%, signal=20%	HomovsU937	pos			GO_INTRASPECIES_INTERACTION_BETWEEN_ORGANISMS	GO_INTRASPECIES_INTERACTION_BETWEEN_ORGANISMS	Details ...	28	-0.682558	-1.68226	0.00618812	0.364633	1	900	tags=21%, list=7%, signal=23%	HomovsU937	neg
KEGG_THYROID_CANCER	KEGG_THYROID_CANCER	Details ...	24	0.195697	0.578182	0.964286	1	1	4564	tags=42%, list=34%, signal=63%	HomovsU937	pos			GO_RESPONSE_TO_AMYLOID_BETA	GO_RESPONSE_TO_AMYLOID_BETA		25	-0.582489	-1.53703	0.0432432	0.365052	1	928	tags=24%, list=7%, signal=26%	HeterovsU937	neg
KEGG_RNA_DEGRADATION	KEGG_RNA_DEGRADATION	Details ...	53	0.153391	0.526458	1	1	1	5080	tags=43%, list=37%, signal=69%	HomovsU937	pos			GO_ANTIMICROBIAL_HUMORAL_IMMUNE_RESPONSE_MEDIATED_BY_ANTIMICROBIAL_PEPTIDE	GO_ANTIMICROBIAL_HUMORAL_IMMUNE_RESPONSE_MEDIATED_BY_ANTIMICROBIAL_PEPTIDE		15	-0.651271	-1.53621	0.0437158	0.365098	1	864	tags=33%, list=6%, signal=36%	HeterovsU937	neg
KEGG_NUCLEOTIDE_EXCISION_REPAIR	KEGG_NUCLEOTIDE_EXCISION_REPAIR	Details ...	40	0.147998	0.510711	1	0.988386	1	4739	tags=43%, list=35%, signal=65%	HomovsU937	pos			GO_PEPTIDYL_SERINE_DEPHOSPHORYLATION	GO_PEPTIDYL_SERINE_DEPHOSPHORYLATION	Details ...	14	-0.779147	-1.82618	0.00172117	0.365332	0.995	3	tags=7%, list=0%, signal=7%	HeterovsU937	neg
KEGG_HYPERTROPHIC_CARDIOMYOPATHY_HCM	KEGG_HYPERTROPHIC_CARDIOMYOPATHY_HCM	Details ...	36	-0.578574	-1.6441	0.0158172	0.238478	0.743	543	tags=17%, list=4%, signal=17%	HeterovsU937	neg			GO_NEURON_PROJECTION_ORGANIZATION	GO_NEURON_PROJECTION_ORGANIZATION	Details ...	67	-0.59963	-1.67999	0.002331	0.365918	1	1702	tags=31%, list=13%, signal=36%	HomovsU937	neg
KEGG_NOD_LIKE_RECEPTOR_SIGNALING_PATHWAY	KEGG_NOD_LIKE_RECEPTOR_SIGNALING_PATHWAY	Details ...	50	-0.595117	-1.7752	0.00326264	0.0733521	0.287	1888	tags=34%, list=14%, signal=39%	HeterovsU937	neg			GO_REGULATION_OF_NITRIC_OXIDE_BIOSYNTHETIC_PROCESS	GO_REGULATION_OF_NITRIC_OXIDE_BIOSYNTHETIC_PROCESS		36	-0.548793	-1.53734	0.0411664	0.366214	1	1878	tags=31%, list=14%, signal=35%	HeterovsU937	neg
KEGG_RETINOL_METABOLISM	KEGG_RETINOL_METABOLISM	Details ...	13	-0.826755	-1.90579	0.00168067	0.0315812	0.055	1490	tags=54%, list=11%, signal=60%	HeterovsU937	neg			GO_NEGATIVE_REGULATION_OF_REGULATED_SECRETORY_PATHWAY	GO_NEGATIVE_REGULATION_OF_REGULATED_SECRETORY_PATHWAY		17	-0.630116	-1.54262	0.0413907	0.366359	1	2033	tags=41%, list=15%, signal=48%	HeterovsU937	neg
KEGG_SYSTEMIC_LUPUS_ERYTHEMATOSUS	KEGG_SYSTEMIC_LUPUS_ERYTHEMATOSUS	Details ...	25	-0.753202	-1.80601	0	0.0171295	0.058	994	tags=40%, list=7%, signal=43%	HomovsU937	neg			GO_INORGANIC_ANION_TRANSMEMBRANE_TRANSPORT	GO_INORGANIC_ANION_TRANSMEMBRANE_TRANSPORT		55	-0.506398	-1.53782	0.022508	0.36691	1	1767	tags=31%, list=13%, signal=35%	HeterovsU937	neg
KEGG_NITROGEN_METABOLISM	KEGG_NITROGEN_METABOLISM	Details ...	10	-0.793996	-1.60844	0.0139535	0.25768	0.783	2080	tags=70%, list=15%, signal=83%	HomovsU937	neg			GO_ODONTOGENESIS	GO_ODONTOGENESIS	Details ...	60	-0.608374	-1.66635	0.00344432	0.3674	1	773	tags=22%, list=6%, signal=23%	HomovsU937	neg
KEGG_TRYPTOPHAN_METABOLISM	KEGG_TRYPTOPHAN_METABOLISM	Details ...	21	-0.725224	-1.72061	0.0117955	0.0693315	0.272	412	tags=19%, list=3%, signal=20%	HomovsU937	neg			GO_REGULATION_OF_ANTIGEN_PROCESSING_AND_PRESENTATION	GO_REGULATION_OF_ANTIGEN_PROCESSING_AND_PRESENTATION		10	-0.699259	-1.53441	0.0415973	0.367842	1	1744	tags=30%, list=13%, signal=34%	HeterovsU937	neg
															GO_REGULATION_OF_CILIUM_BEAT_FREQUENCY	GO_REGULATION_OF_CILIUM_BEAT_FREQUENCY		10	-0.714567	-1.54273	0.0429553	0.368189	1	1966	tags=40%, list=14%, signal=47%	HeterovsU937	neg
															GO_NEGATIVE_REGULATION_OF_ANTIGEN_RECEPTOR_MEDIATED_SIGNALING_PATHWAY	GO_NEGATIVE_REGULATION_OF_ANTIGEN_RECEPTOR_MEDIATED_SIGNALING_PATHWAY		19	-0.617401	-1.53805	0.0545775	0.368317	1	1557	tags=26%, list=11%, signal=30%	HeterovsU937	neg
															GO_DENDRITIC_SPINE_DEVELOPMENT	GO_DENDRITIC_SPINE_DEVELOPMENT		79	-0.484453	-1.54345	0.00943396	0.368507	1	2172	tags=29%, list=16%, signal=34%	HeterovsU937	neg
															GO_T_CELL_EXTRAVASATION	GO_T_CELL_EXTRAVASATION		11	-0.690228	-1.53862	0.0352349	0.368784	1	1191	tags=36%, list=9%, signal=40%	HeterovsU937	neg
															GO_REGULATION_OF_CARDIAC_CONDUCTION	GO_REGULATION_OF_CARDIAC_CONDUCTION	Details ...	35	-0.645239	-1.65913	0.00501882	0.370193	1	658	tags=14%, list=5%, signal=15%	HomovsU937	neg
															GO_NEUROTRANSMITTER_REUPTAKE	GO_NEUROTRANSMITTER_REUPTAKE	Details ...	14	0.823788	1.94302	0.00234742	0.370415	0.809	666	tags=29%, list=5%, signal=30%	HeterovsU937	pos
															GO_CGMP_MEDIATED_SIGNALING	GO_CGMP_MEDIATED_SIGNALING		11	-0.709165	-1.53946	0.0383912	0.370466	1	504	tags=36%, list=4%, signal=38%	HeterovsU937	neg
															GO_HEART_VALVE_DEVELOPMENT	GO_HEART_VALVE_DEVELOPMENT	Details ...	36	-0.655346	-1.66751	0.00869565	0.370487	1	686	tags=22%, list=5%, signal=23%	HomovsU937	neg
															GO_DENDRITIC_CELL_CHEMOTAXIS	GO_DENDRITIC_CELL_CHEMOTAXIS	Details ...	13	-0.755102	-1.66394	0.0124481	0.370632	1	1373	tags=38%, list=10%, signal=43%	HomovsU937	neg
															GO_COMPLEMENT_ACTIVATION	GO_COMPLEMENT_ACTIVATION	Details ...	29	-0.710007	-1.76967	0.00625782	0.370636	0.977	1001	tags=41%, list=7%, signal=45%	HomovsU937	neg
															GO_REGULATION_OF_T_HELPER_CELL_DIFFERENTIATION	GO_REGULATION_OF_T_HELPER_CELL_DIFFERENTIATION		23	-0.596259	-1.53868	0.0393836	0.370651	1	1044	tags=22%, list=8%, signal=24%	HeterovsU937	neg
															GO_REGULATION_OF_REACTIVE_OXYGEN_SPECIES_BIOSYNTHETIC_PROCESS	GO_REGULATION_OF_REACTIVE_OXYGEN_SPECIES_BIOSYNTHETIC_PROCESS		56	-0.492661	-1.53269	0.0214168	0.370705	1	2022	tags=30%, list=15%, signal=36%	HeterovsU937	neg
															GO_BASEMENT_MEMBRANE_ORGANIZATION	GO_BASEMENT_MEMBRANE_ORGANIZATION	Details ...	16	-0.745705	-1.68311	0.00407056	0.37134	1	1052	tags=31%, list=8%, signal=34%	HomovsU937	neg
															GO_REGULATION_OF_CALCIUM_ION_TRANSPORT	GO_REGULATION_OF_CALCIUM_ION_TRANSPORT		132	-0.43901	-1.53987	0.00791139	0.371469	1	1899	tags=27%, list=14%, signal=31%	HeterovsU937	neg
															GO_EPITHELIAL_CELL_MORPHOGENESIS	GO_EPITHELIAL_CELL_MORPHOGENESIS	Details ...	22	-0.740111	-1.74757	0.00131234	0.371928	0.994	1052	tags=32%, list=8%, signal=34%	HomovsU937	neg
															GO_NEUTROPHIL_MIGRATION	GO_NEUTROPHIL_MIGRATION		58	-0.500882	-1.52149	0.0386643	0.373139	1	2030	tags=36%, list=15%, signal=42%	HeterovsU937	neg
															GO_ACTIVATION_OF_CYSTEINE_TYPE_ENDOPEPTIDASE_ACTIVITY	GO_ACTIVATION_OF_CYSTEINE_TYPE_ENDOPEPTIDASE_ACTIVITY	Details ...	10	-0.80568	-1.6618	0.0138037	0.373252	1	145	tags=20%, list=1%, signal=20%	HomovsU937	neg
															GO_ENERGY_HOMEOSTASIS	GO_ENERGY_HOMEOSTASIS		23	-0.59643	-1.52206	0.0487395	0.373566	1	244	tags=13%, list=2%, signal=13%	HeterovsU937	neg
															GO_REGULATION_OF_CARDIAC_MUSCLE_CELL_ACTION_POTENTIAL	GO_REGULATION_OF_CARDIAC_MUSCLE_CELL_ACTION_POTENTIAL		17	-0.614552	-1.52905	0.0523649	0.374151	1	1384	tags=47%, list=10%, signal=52%	HeterovsU937	neg
															GO_COMPLEMENT_ACTIVATION	GO_COMPLEMENT_ACTIVATION	Details ...	29	-0.779624	-1.83679	0.00372671	0.374348	0.343	907	tags=45%, list=7%, signal=48%	HomovsHetero	neg
															GO_REGULATION_OF_PROTEIN_TYROSINE_KINASE_ACTIVITY	GO_REGULATION_OF_PROTEIN_TYROSINE_KINASE_ACTIVITY		59	-0.495042	-1.5238	0.0215589	0.374551	1	1363	tags=25%, list=10%, signal=28%	HeterovsU937	neg
															GO_POSITIVE_REGULATION_OF_AMINO_ACID_TRANSPORT	GO_POSITIVE_REGULATION_OF_AMINO_ACID_TRANSPORT		10	-0.708056	-1.53039	0.0472855	0.374575	1	2062	tags=50%, list=15%, signal=59%	HeterovsU937	neg
															GO_PRODUCTION_OF_MOLECULAR_MEDIATOR_INVOLVED_IN_INFLAMMATORY_RESPONSE	GO_PRODUCTION_OF_MOLECULAR_MEDIATOR_INVOLVED_IN_INFLAMMATORY_RESPONSE		47	-0.514975	-1.52212	0.0385965	0.375259	1	1024	tags=17%, list=8%, signal=18%	HeterovsU937	neg
															GO_POSITIVE_REGULATION_OF_COAGULATION	GO_POSITIVE_REGULATION_OF_COAGULATION		15	-0.639513	-1.52705	0.0549828	0.375293	1	1531	tags=33%, list=11%, signal=38%	HeterovsU937	neg
															GO_CYTOSOLIC_CALCIUM_ION_TRANSPORT	GO_CYTOSOLIC_CALCIUM_ION_TRANSPORT		92	-0.462214	-1.52927	0.00666667	0.375511	1	1905	tags=24%, list=14%, signal=28%	HeterovsU937	neg
															GO_POSITIVE_REGULATION_OF_CALCIUM_ION_TRANSMEMBRANE_TRANSPORTER_ACTIVITY	GO_POSITIVE_REGULATION_OF_CALCIUM_ION_TRANSMEMBRANE_TRANSPORTER_ACTIVITY		21	-0.588261	-1.52414	0.0636516	0.37552	1	5	tags=5%, list=0%, signal=5%	HeterovsU937	neg
															GO_PLASMA_LIPOPROTEIN_PARTICLE_CLEARANCE	GO_PLASMA_LIPOPROTEIN_PARTICLE_CLEARANCE		36	-0.541111	-1.52607	0.0288136	0.375947	1	2119	tags=22%, list=16%, signal=26%	HeterovsU937	neg
															GO_ACTIVATION_OF_CYSTEINE_TYPE_ENDOPEPTIDASE_ACTIVITY	GO_ACTIVATION_OF_CYSTEINE_TYPE_ENDOPEPTIDASE_ACTIVITY		10	-0.695753	-1.52252	0.0507246	0.376136	1	1013	tags=40%, list=7%, signal=43%	HeterovsU937	neg
															GO_POSTSYNAPTIC_SPECIALIZATION_ASSEMBLY	GO_POSTSYNAPTIC_SPECIALIZATION_ASSEMBLY	Details ...	11	-0.835712	-1.65654	0.0089153	0.376298	1	795	tags=45%, list=6%, signal=48%	HomovsHetero	neg
															GO_REGULATION_OF_TRANSPORTER_ACTIVITY	GO_REGULATION_OF_TRANSPORTER_ACTIVITY		153	-0.422321	-1.52519	0.00460123	0.376525	1	1431	tags=22%, list=11%, signal=25%	HeterovsU937	neg
															GO_SENSORY_PERCEPTION_OF_CHEMICAL_STIMULUS	GO_SENSORY_PERCEPTION_OF_CHEMICAL_STIMULUS		27	-0.568354	-1.52432	0.0557432	0.376849	1	657	tags=19%, list=5%, signal=19%	HeterovsU937	neg
															GO_VITAMIN_D_METABOLIC_PROCESS	GO_VITAMIN_D_METABOLIC_PROCESS		13	-0.660837	-1.52712	0.0623917	0.377029	1	1490	tags=38%, list=11%, signal=43%	HeterovsU937	neg
															GO_CELLULAR_RESPONSE_TO_AMYLOID_BETA	GO_CELLULAR_RESPONSE_TO_AMYLOID_BETA	Details ...	21	-0.719138	-1.67375	0.00933333	0.377345	1	1698	tags=38%, list=13%, signal=43%	HomovsU937	neg
															GO_DETECTION_OF_VISIBLE_LIGHT	GO_DETECTION_OF_VISIBLE_LIGHT	Details ...	27	-0.684228	-1.65914	0.00893997	0.378241	1	1933	tags=37%, list=14%, signal=43%	HomovsU937	neg
															GO_POSITIVE_REGULATION_OF_SMOOTH_MUSCLE_CONTRACTION	GO_POSITIVE_REGULATION_OF_SMOOTH_MUSCLE_CONTRACTION	Details ...	13	-0.806644	-1.66158	0.010355	0.378707	1	1124	tags=38%, list=8%, signal=42%	HomovsHetero	neg
															GO_B_CELL_PROLIFERATION	GO_B_CELL_PROLIFERATION		51	-0.500473	-1.50826	0.0362776	0.378978	1	1939	tags=35%, list=14%, signal=41%	HeterovsU937	neg
															GO_POSTSYNAPTIC_SPECIALIZATION_ORGANIZATION	GO_POSTSYNAPTIC_SPECIALIZATION_ORGANIZATION	Details ...	19	-0.724391	-1.68372	0.00991501	0.379205	1	1553	tags=42%, list=11%, signal=47%	HomovsU937	neg
															GO_PHOSPHOLIPASE_C_ACTIVATING_G_PROTEIN_COUPLED_RECEPTOR_SIGNALING_PATHWAY	GO_PHOSPHOLIPASE_C_ACTIVATING_G_PROTEIN_COUPLED_RECEPTOR_SIGNALING_PATHWAY	Details ...	35	-0.655509	-1.66754	0.00632111	0.379394	1	723	tags=26%, list=5%, signal=27%	HomovsU937	neg
															GO_T_HELPER_1_CELL_DIFFERENTIATION	GO_T_HELPER_1_CELL_DIFFERENTIATION		12	-0.664571	-1.50869	0.0784641	0.379561	1	2782	tags=58%, list=20%, signal=73%	HeterovsU937	neg
															GO_POSITIVE_REGULATION_OF_INTERLEUKIN_2_PRODUCTION	GO_POSITIVE_REGULATION_OF_INTERLEUKIN_2_PRODUCTION		20	-0.595234	-1.50693	0.0424448	0.380589	1	1798	tags=40%, list=13%, signal=46%	HeterovsU937	neg
															GO_POSITIVE_CHEMOTAXIS	GO_POSITIVE_CHEMOTAXIS	Details ...	26	-0.71238	-1.7333	0.00536913	0.380621	0.999	1345	tags=38%, list=10%, signal=43%	HomovsU937	neg
															GO_MACROPHAGE_MIGRATION	GO_MACROPHAGE_MIGRATION	Details ...	26	-0.706887	-1.68565	0.00262467	0.380883	1	1093	tags=35%, list=8%, signal=38%	HomovsU937	neg
															GO_GLUTAMATE_RECEPTOR_SIGNALING_PATHWAY	GO_GLUTAMATE_RECEPTOR_SIGNALING_PATHWAY		55	-0.499656	-1.50877	0.0240385	0.381073	1	2112	tags=55%, list=16%, signal=64%	HeterovsU937	neg
															GO_PHOTOTRANSDUCTION	GO_PHOTOTRANSDUCTION	Details ...	23	-0.720696	-1.74125	0.00397878	0.38157	0.997	355	tags=22%, list=3%, signal=22%	HomovsU937	neg
															GO_REGULATION_OF_LEUKOCYTE_CHEMOTAXIS	GO_REGULATION_OF_LEUKOCYTE_CHEMOTAXIS	Details ...	61	-0.610206	-1.68762	0.00113507	0.381759	1	2115	tags=38%, list=16%, signal=44%	HomovsU937	neg
															GO_GLUTAMATE_RECEPTOR_SIGNALING_PATHWAY	GO_GLUTAMATE_RECEPTOR_SIGNALING_PATHWAY	Details ...	55	-0.659903	-1.7744	0.00114416	0.381846	0.964	1594	tags=40%, list=12%, signal=45%	HomovsU937	neg
															GO_NEGATIVE_REGULATION_OF_PRODUCTION_OF_MOLECULAR_MEDIATOR_OF_IMMUNE_RESPONSE	GO_NEGATIVE_REGULATION_OF_PRODUCTION_OF_MOLECULAR_MEDIATOR_OF_IMMUNE_RESPONSE		20	-0.604454	-1.50908	0.0543294	0.381982	1	1174	tags=25%, list=9%, signal=27%	HeterovsU937	neg
															GO_ADAPTIVE_IMMUNE_RESPONSE_BASED_ON_SOMATIC_RECOMBINATION_OF_IMMUNE_RECEPTORS_BUILT_FROM_IMMUNOGLOBULIN_SUPERFAMILY_DOMAINS	GO_ADAPTIVE_IMMUNE_RESPONSE_BASED_ON_SOMATIC_RECOMBINATION_OF_IMMUNE_RECEPTORS_BUILT_FROM_IMMUNOGLOBULIN_SUPERFAMILY_DOMAINS		168	-0.417575	-1.50929	0.00611621	0.383249	1	1753	tags=27%, list=13%, signal=30%	HeterovsU937	neg
															GO_EXTRACELLULAR_MATRIX_ASSEMBLY	GO_EXTRACELLULAR_MATRIX_ASSEMBLY	Details ...	26	-0.690426	-1.69201	0.00760456	0.383381	1	1316	tags=31%, list=10%, signal=34%	HomovsU937	neg
															GO_NEGATIVE_REGULATION_OF_VASCULATURE_DEVELOPMENT	GO_NEGATIVE_REGULATION_OF_VASCULATURE_DEVELOPMENT		72	-0.594194	-1.6454	0.00110132	0.383898	1	1576	tags=31%, list=12%, signal=34%	HomovsU937	neg
															GO_KIDNEY_MORPHOGENESIS	GO_KIDNEY_MORPHOGENESIS	Details ...	43	-0.657601	-1.64227	0.00591017	0.384077	1	1810	tags=26%, list=13%, signal=29%	HomovsHetero	neg
															GO_ANION_TRANSMEMBRANE_TRANSPORT	GO_ANION_TRANSMEMBRANE_TRANSPORT		160	-0.41912	-1.50954	0.0107692	0.384354	1	1807	tags=22%, list=13%, signal=25%	HeterovsU937	neg
															GO_POSITIVE_REGULATION_OF_INTERFERON_GAMMA_PRODUCTION	GO_POSITIVE_REGULATION_OF_INTERFERON_GAMMA_PRODUCTION		34	-0.542159	-1.51503	0.027027	0.384563	1	1798	tags=44%, list=13%, signal=51%	HeterovsU937	neg
															GO_BLASTODERM_SEGMENTATION	GO_BLASTODERM_SEGMENTATION	Details ...	10	-0.844703	-1.70823	0.00290276	0.384785	1	347	tags=30%, list=3%, signal=31%	HomovsU937	neg
															GO_LYMPHOCYTE_CHEMOTAXIS	GO_LYMPHOCYTE_CHEMOTAXIS		18	-0.608748	-1.5135	0.059727	0.384872	1	1291	tags=28%, list=10%, signal=31%	HeterovsU937	neg
															GO_REGULATION_OF_COAGULATION	GO_REGULATION_OF_COAGULATION		45	-0.639628	-1.64661	0.00235018	0.385406	1	2744	tags=49%, list=20%, signal=61%	HomovsU937	neg
															GO_HINDLIMB_MORPHOGENESIS	GO_HINDLIMB_MORPHOGENESIS	Details ...	18	-0.757478	-1.65666	0.0160858	0.385445	1	185	tags=17%, list=1%, signal=17%	HomovsHetero	neg
															GO_LYMPHOCYTE_MEDIATED_IMMUNITY	GO_LYMPHOCYTE_MEDIATED_IMMUNITY		163	-0.419172	-1.5154	0.00950872	0.385481	1	1753	tags=25%, list=13%, signal=28%	HeterovsU937	neg
															GO_AORTA_MORPHOGENESIS	GO_AORTA_MORPHOGENESIS	Details ...	17	-0.75078	-1.64064	0.0140845	0.385507	1	624	tags=29%, list=5%, signal=31%	HomovsHetero	neg
															GO_REGULATION_OF_NMDA_RECEPTOR_ACTIVITY	GO_REGULATION_OF_NMDA_RECEPTOR_ACTIVITY	Details ...	22	-0.710305	-1.69424	0.00655308	0.385633	1	1594	tags=45%, list=12%, signal=51%	HomovsU937	neg
															GO_REGULATION_OF_RESPONSE_TO_REACTIVE_OXYGEN_SPECIES	GO_REGULATION_OF_RESPONSE_TO_REACTIVE_OXYGEN_SPECIES		21	-0.590516	-1.51606	0.0314685	0.38564	1	2006	tags=29%, list=15%, signal=33%	HeterovsU937	neg
															GO_BASEMENT_MEMBRANE_ORGANIZATION	GO_BASEMENT_MEMBRANE_ORGANIZATION		16	-0.626424	-1.51389	0.0451505	0.385649	1	557	tags=19%, list=4%, signal=20%	HeterovsU937	neg
															GO_GRANULOCYTE_MIGRATION	GO_GRANULOCYTE_MIGRATION		70	-0.477825	-1.51035	0.025974	0.385939	1	2030	tags=34%, list=15%, signal=40%	HeterovsU937	neg
															GO_REGULATION_OF_PROGRAMMED_NECROTIC_CELL_DEATH	GO_REGULATION_OF_PROGRAMMED_NECROTIC_CELL_DEATH		12	-0.65838	-1.5096	0.0634391	0.385987	1	966	tags=25%, list=7%, signal=27%	HeterovsU937	neg
															GO_GMP_METABOLIC_PROCESS	GO_GMP_METABOLIC_PROCESS		12	-0.668827	-1.51164	0.0685155	0.386177	1	1899	tags=42%, list=14%, signal=48%	HeterovsU937	neg
															GO_ZYMOGEN_ACTIVATION	GO_ZYMOGEN_ACTIVATION		26	-0.673072	-1.63636	0.0169935	0.386451	1	1317	tags=35%, list=10%, signal=38%	HomovsU937	neg
															GO_ESTABLISHMENT_OF_ENDOTHELIAL_BARRIER	GO_ESTABLISHMENT_OF_ENDOTHELIAL_BARRIER		34	-0.536109	-1.51076	0.0457516	0.386669	1	1473	tags=26%, list=11%, signal=30%	HeterovsU937	neg
															GO_LYMPHOCYTE_ACTIVATION_INVOLVED_IN_IMMUNE_RESPONSE	GO_LYMPHOCYTE_ACTIVATION_INVOLVED_IN_IMMUNE_RESPONSE		114	-0.436843	-1.51197	0.0202361	0.387215	1	2954	tags=33%, list=22%, signal=42%	HeterovsU937	neg
															GO_LEARNING	GO_LEARNING	Details ...	98	-0.608907	-1.66388	0.00105485	0.387534	1	943	tags=17%, list=7%, signal=19%	HomovsHetero	neg
															GO_MODIFICATION_OF_SYNAPTIC_STRUCTURE	GO_MODIFICATION_OF_SYNAPTIC_STRUCTURE	Details ...	17	-0.824961	-1.83078	0	0.333669	0.695	413	tags=24%, list=3%, signal=24%	HomovsU937	neg
															GO_REGULATION_OF_VASCULAR_PERMEABILITY	GO_REGULATION_OF_VASCULAR_PERMEABILITY	Details ...	24	-0.716297	-1.65286	0.00519481	0.388804	1	829	tags=25%, list=6%, signal=27%	HomovsHetero	neg
															GO_RESPONSE_TO_EPINEPHRINE	GO_RESPONSE_TO_EPINEPHRINE	Details ...	12	-0.784616	-1.66755	0.011396	0.388813	1	1351	tags=42%, list=10%, signal=46%	HomovsU937	neg
															GO_REGULATION_OF_RENAL_SYSTEM_PROCESS	GO_REGULATION_OF_RENAL_SYSTEM_PROCESS	Details ...	12	-0.786992	-1.68866	0.00441176	0.388819	1	461	tags=33%, list=3%, signal=34%	HomovsU937	neg
															GO_METANEPHRIC_NEPHRON_DEVELOPMENT	GO_METANEPHRIC_NEPHRON_DEVELOPMENT	Details ...	12	-0.810954	-1.6655	0.00865801	0.389535	1	286	tags=25%, list=2%, signal=26%	HomovsHetero	neg
															GO_GLYCOPROTEIN_CATABOLIC_PROCESS	GO_GLYCOPROTEIN_CATABOLIC_PROCESS		14	-0.754813	-1.63986	0.0183357	0.389555	1	1803	tags=29%, list=13%, signal=33%	HomovsU937	neg
															GO_DETECTION_OF_MECHANICAL_STIMULUS	GO_DETECTION_OF_MECHANICAL_STIMULUS	Details ...	23	-0.706666	-1.64277	0.00925926	0.389588	1	1026	tags=26%, list=8%, signal=28%	HomovsHetero	neg
															GO_RESPONSE_TO_AMYLOID_BETA	GO_RESPONSE_TO_AMYLOID_BETA	Details ...	25	-0.674141	-1.65206	0.0148248	0.389723	1	1698	tags=32%, list=13%, signal=37%	HomovsU937	neg
															GO_CENTRAL_NERVOUS_SYSTEM_PROJECTION_NEURON_AXONOGENESIS	GO_CENTRAL_NERVOUS_SYSTEM_PROJECTION_NEURON_AXONOGENESIS	Details ...	17	-0.758657	-1.64743	0.0153203	0.390437	1	1565	tags=41%, list=12%, signal=46%	HomovsHetero	neg
															GO_NATURAL_KILLER_CELL_ACTIVATION	GO_NATURAL_KILLER_CELL_ACTIVATION	Details ...	44	0.508862	1.77976	0	0.396509	0.994	192	tags=16%, list=1%, signal=16%	HomovsHetero	pos
															GO_B_CELL_MEDIATED_IMMUNITY	GO_B_CELL_MEDIATED_IMMUNITY		79	-0.570089	-1.64263	0.00110988	0.39116	1	1880	tags=25%, list=14%, signal=29%	HomovsU937	neg
															GO_EXCITATORY_SYNAPSE_ASSEMBLY	GO_EXCITATORY_SYNAPSE_ASSEMBLY	Details ...	13	-0.774324	-1.66901	0.01	0.391202	1	835	tags=54%, list=6%, signal=57%	HomovsU937	neg
															GO_POSITIVE_REGULATION_OF_PROTEIN_TYROSINE_KINASE_ACTIVITY	GO_POSITIVE_REGULATION_OF_PROTEIN_TYROSINE_KINASE_ACTIVITY	Details ...	32	-0.688473	-1.74918	0.00655308	0.391481	0.993	958	tags=34%, list=7%, signal=37%	HomovsU937	neg
															GO_BLOOD_VESSEL_REMODELING	GO_BLOOD_VESSEL_REMODELING		22	-0.69385	-1.64684	0.00933333	0.391512	1	484	tags=23%, list=4%, signal=24%	HomovsU937	neg
															GO_DENDRITIC_CELL_MIGRATION	GO_DENDRITIC_CELL_MIGRATION		17	-0.719115	-1.63802	0.0177839	0.391579	1	1373	tags=29%, list=10%, signal=33%	HomovsU937	neg
															GO_FIBRINOLYSIS	GO_FIBRINOLYSIS		10	-0.797943	-1.63661	0.0175695	0.391836	1	1187	tags=50%, list=9%, signal=55%	HomovsU937	neg
															GO_NEGATIVE_REGULATION_OF_SPROUTING_ANGIOGENESIS	GO_NEGATIVE_REGULATION_OF_SPROUTING_ANGIOGENESIS	Details ...	14	-0.769944	-1.69552	0.0124481	0.392387	1	112	tags=21%, list=1%, signal=22%	HomovsU937	neg
															GO_T_CELL_PROLIFERATION	GO_T_CELL_PROLIFERATION		125	-0.428555	-1.50162	0.0125786	0.392779	1	3307	tags=38%, list=24%, signal=50%	HeterovsU937	neg
															GO_EXTRACELLULAR_MATRIX_ASSEMBLY	GO_EXTRACELLULAR_MATRIX_ASSEMBLY	Details ...	26	-0.713533	-1.65725	0.00880503	0.392857	1	899	tags=31%, list=7%, signal=33%	HomovsHetero	neg
															GO_REGULATION_OF_LONG_TERM_NEURONAL_SYNAPTIC_PLASTICITY	GO_REGULATION_OF_LONG_TERM_NEURONAL_SYNAPTIC_PLASTICITY		19	-0.703203	-1.64803	0.0109739	0.393628	1	399	tags=21%, list=3%, signal=22%	HomovsU937	neg
															GO_NEGATIVE_REGULATION_OF_ALPHA_BETA_T_CELL_ACTIVATION	GO_NEGATIVE_REGULATION_OF_ALPHA_BETA_T_CELL_ACTIVATION	Details ...	27	0.621402	1.92511	0	1	0.677	1661	tags=44%, list=12%, signal=51%	HomovsHetero	pos
															GO_PHOTOTRANSDUCTION_VISIBLE_LIGHT	GO_PHOTOTRANSDUCTION_VISIBLE_LIGHT		17	-0.72181	-1.64034	0.0111111	0.394451	1	355	tags=24%, list=3%, signal=24%	HomovsU937	neg
															GO_REGULATION_OF_POSITIVE_CHEMOTAXIS	GO_REGULATION_OF_POSITIVE_CHEMOTAXIS	Details ...	12	-0.7906	-1.70056	0.00603318	0.394495	1	1345	tags=58%, list=10%, signal=65%	HomovsU937	neg
															GO_SENSORY_PERCEPTION_OF_LIGHT_STIMULUS	GO_SENSORY_PERCEPTION_OF_LIGHT_STIMULUS	Details ...	88	-0.575945	-1.64928	0.00109409	0.395498	1	3249	tags=45%, list=24%, signal=59%	HomovsU937	neg
															GO_REGULATION_OF_PROTEIN_MATURATION	GO_REGULATION_OF_PROTEIN_MATURATION		46	-0.498977	-1.4921	0.0436975	0.395601	1	2764	tags=41%, list=20%, signal=52%	HeterovsU937	neg
															GO_NUCLEOTIDE_BINDING_DOMAIN_LEUCINE_RICH_REPEAT_CONTAINING_RECEPTOR_SIGNALING_PATHWAY	GO_NUCLEOTIDE_BINDING_DOMAIN_LEUCINE_RICH_REPEAT_CONTAINING_RECEPTOR_SIGNALING_PATHWAY		34	-0.53911	-1.49268	0.0380795	0.395743	1	2028	tags=35%, list=15%, signal=41%	HeterovsU937	neg
															GO_POSITIVE_REGULATION_OF_NITRIC_OXIDE_METABOLIC_PROCESS	GO_POSITIVE_REGULATION_OF_NITRIC_OXIDE_METABOLIC_PROCESS		28	-0.555919	-1.49331	0.0456942	0.395792	1	1878	tags=32%, list=14%, signal=37%	HeterovsU937	neg
															GO_ADAPTIVE_THERMOGENESIS	GO_ADAPTIVE_THERMOGENESIS		92	-0.449705	-1.49573	0.0175439	0.396227	1	2449	tags=25%, list=18%, signal=30%	HeterovsU937	neg
															GO_GOLGI_TO_ENDOSOME_TRANSPORT	GO_GOLGI_TO_ENDOSOME_TRANSPORT		14	-0.747035	-1.62921	0.0114943	0.396253	1	420	tags=14%, list=3%, signal=15%	HomovsU937	neg
															GO_NEGATIVE_REGULATION_OF_TORC1_SIGNALING	GO_NEGATIVE_REGULATION_OF_TORC1_SIGNALING	Details ...	11	0.733849	1.77405	0.00970874	0.396364	0.996	2126	tags=45%, list=16%, signal=54%	HomovsHetero	pos
															GO_RESPONSE_TO_PURINE_CONTAINING_COMPOUND	GO_RESPONSE_TO_PURINE_CONTAINING_COMPOUND		88	-0.45013	-1.49369	0.0262295	0.396487	1	2620	tags=31%, list=19%, signal=38%	HeterovsU937	neg
															GO_NEGATIVE_REGULATION_OF_CD4_POSITIVE_ALPHA_BETA_T_CELL_ACTIVATION	GO_NEGATIVE_REGULATION_OF_CD4_POSITIVE_ALPHA_BETA_T_CELL_ACTIVATION	Details ...	22	0.600582	1.83345	0	0.455744	0.959	3830	tags=73%, list=28%, signal=101%	HomovsHetero	pos
															GO_NEGATIVE_REGULATION_OF_B_CELL_PROLIFERATION	GO_NEGATIVE_REGULATION_OF_B_CELL_PROLIFERATION		12	-0.671258	-1.4943	0.0757042	0.396683	1	1939	tags=42%, list=14%, signal=49%	HeterovsU937	neg
															GO_LEUKOCYTE_TETHERING_OR_ROLLING	GO_LEUKOCYTE_TETHERING_OR_ROLLING		14	-0.631321	-1.49106	0.0700855	0.396713	1	1337	tags=36%, list=10%, signal=40%	HeterovsU937	neg
															GO_PROTEIN_PALMITOYLATION	GO_PROTEIN_PALMITOYLATION		29	-0.654421	-1.63169	0.0116279	0.396812	1	1719	tags=31%, list=13%, signal=35%	HomovsU937	neg
															GO_EPHRIN_RECEPTOR_SIGNALING_PATHWAY	GO_EPHRIN_RECEPTOR_SIGNALING_PATHWAY	Details ...	62	-0.626712	-1.64305	0.00331492	0.396845	1	1181	tags=21%, list=9%, signal=23%	HomovsHetero	neg
															GO_REGULATION_OF_NEUTROPHIL_ACTIVATION	GO_REGULATION_OF_NEUTROPHIL_ACTIVATION		10	-0.689356	-1.49485	0.061082	0.396924	1	1404	tags=30%, list=10%, signal=33%	HeterovsU937	neg
															GO_NEGATIVE_REGULATION_OF_KINASE_ACTIVITY	GO_NEGATIVE_REGULATION_OF_KINASE_ACTIVITY		191	0.294939	1.29924	0	0.741521	1	1524	tags=23%, list=11%, signal=26%	HomovsHetero	pos
															GO_NEGATIVE_REGULATION_OF_INTERLEUKIN_1_BETA_PRODUCTION	GO_NEGATIVE_REGULATION_OF_INTERLEUKIN_1_BETA_PRODUCTION		13	-0.644976	-1.49848	0.0625	0.397456	1	1337	tags=38%, list=10%, signal=43%	HeterovsU937	neg
															GO_POSITIVE_REGULATION_OF_TISSUE_REMODELING	GO_POSITIVE_REGULATION_OF_TISSUE_REMODELING		16	-0.615937	-1.49574	0.0816327	0.39795	1	1106	tags=25%, list=8%, signal=27%	HeterovsU937	neg
															GO_NEGATIVE_REGULATION_OF_LYMPHOCYTE_ACTIVATION	GO_NEGATIVE_REGULATION_OF_LYMPHOCYTE_ACTIVATION		91	0.39309	1.53316	0	0.772828	1	1057	tags=25%, list=8%, signal=27%	HomovsHetero	pos
															GO_REGULATION_OF_POSITIVE_CHEMOTAXIS	GO_REGULATION_OF_POSITIVE_CHEMOTAXIS	Details ...	12	-0.794316	-1.6444	0.0104634	0.398259	1	720	tags=50%, list=5%, signal=53%	HomovsHetero	neg
															GO_REGULATION_OF_PROTEIN_AUTOPHOSPHORYLATION	GO_REGULATION_OF_PROTEIN_AUTOPHOSPHORYLATION		34	-0.530846	-1.49626	0.0363322	0.398441	1	2512	tags=38%, list=18%, signal=47%	HeterovsU937	neg
															GO_ENDOCARDIAL_CUSHION_DEVELOPMENT	GO_ENDOCARDIAL_CUSHION_DEVELOPMENT		23	-0.688503	-1.6326	0.00917431	0.398484	1	624	tags=26%, list=5%, signal=27%	HomovsU937	neg
															GO_NEGATIVE_REGULATION_OF_WOUND_HEALING	GO_NEGATIVE_REGULATION_OF_WOUND_HEALING		36	-0.525148	-1.49868	0.0334448	0.398642	1	2013	tags=42%, list=15%, signal=49%	HeterovsU937	neg
															GO_MAMMARY_GLAND_MORPHOGENESIS	GO_MAMMARY_GLAND_MORPHOGENESIS	Details ...	23	-0.7201	-1.64758	0.0111524	0.399051	1	1494	tags=35%, list=11%, signal=39%	HomovsHetero	neg
															GO_POSITIVE_REGULATION_OF_INTERLEUKIN_4_PRODUCTION	GO_POSITIVE_REGULATION_OF_INTERLEUKIN_4_PRODUCTION		19	-0.590011	-1.49725	0.0595447	0.399208	1	3101	tags=53%, list=23%, signal=68%	HeterovsU937	neg
															GO_LEUKOTRIENE_METABOLIC_PROCESS	GO_LEUKOTRIENE_METABOLIC_PROCESS	Details ...	14	0.694136	1.88975	0.00609756	0.399232	0.964	609	tags=29%, list=4%, signal=30%	HomovsU937	pos
															GO_POSITIVE_REGULATION_OF_CYTOKINE_PRODUCTION_INVOLVED_IN_INFLAMMATORY_RESPONSE	GO_POSITIVE_REGULATION_OF_CYTOKINE_PRODUCTION_INVOLVED_IN_INFLAMMATORY_RESPONSE		14	-0.639375	-1.48746	0.0618557	0.399474	1	321	tags=14%, list=2%, signal=15%	HeterovsU937	neg
															GO_REGULATION_OF_MACROPHAGE_DERIVED_FOAM_CELL_DIFFERENTIATION	GO_REGULATION_OF_MACROPHAGE_DERIVED_FOAM_CELL_DIFFERENTIATION		13	-0.667024	-1.49632	0.0697279	0.400046	1	1888	tags=46%, list=14%, signal=54%	HeterovsU937	neg
															GO_COLLAGEN_CATABOLIC_PROCESS	GO_COLLAGEN_CATABOLIC_PROCESS	Details ...	22	-0.732844	-1.73424	0.00560224	0.400711	0.998	354	tags=23%, list=3%, signal=23%	HomovsU937	neg
															GO_HETEROPHILIC_CELL_CELL_ADHESION_VIA_PLASMA_MEMBRANE_CELL_ADHESION_MOLECULES	GO_HETEROPHILIC_CELL_CELL_ADHESION_VIA_PLASMA_MEMBRANE_CELL_ADHESION_MOLECULES		15	-0.736792	-1.62951	0.015299	0.400951	1	720	tags=33%, list=5%, signal=35%	HomovsU937	neg
															GO_REGULATION_OF_CATION_CHANNEL_ACTIVITY	GO_REGULATION_OF_CATION_CHANNEL_ACTIVITY		93	-0.450928	-1.48818	0.0191083	0.401002	1	2124	tags=34%, list=16%, signal=41%	HeterovsU937	neg
															GO_REGULATION_OF_CYTOPLASMIC_MRNA_PROCESSING_BODY_ASSEMBLY	GO_REGULATION_OF_CYTOPLASMIC_MRNA_PROCESSING_BODY_ASSEMBLY		10	-0.673602	-1.48875	0.0672414	0.401071	1	64	tags=10%, list=0%, signal=10%	HeterovsU937	neg
															GO_NEGATIVE_REGULATION_OF_INTERLEUKIN_6_PRODUCTION	GO_NEGATIVE_REGULATION_OF_INTERLEUKIN_6_PRODUCTION		20	-0.58923	-1.48749	0.0565068	0.401079	1	1486	tags=30%, list=11%, signal=34%	HeterovsU937	neg
															GO_DETECTION_OF_LIGHT_STIMULUS	GO_DETECTION_OF_LIGHT_STIMULUS	Details ...	31	-0.681561	-1.69659	0.00383632	0.401455	1	1933	tags=35%, list=14%, signal=41%	HomovsU937	neg
															GO_DETECTION_OF_ABIOTIC_STIMULUS	GO_DETECTION_OF_ABIOTIC_STIMULUS	Details ...	63	-0.617271	-1.70831	0.00342466	0.401793	1	2068	tags=33%, list=15%, signal=39%	HomovsU937	neg
															GO_NEGATIVE_REGULATION_OF_COAGULATION	GO_NEGATIVE_REGULATION_OF_COAGULATION		25	-0.561145	-1.48362	0.0473684	0.402762	1	1963	tags=44%, list=14%, signal=51%	HeterovsU937	neg
															GO_INFLAMMATORY_RESPONSE_TO_ANTIGENIC_STIMULUS	GO_INFLAMMATORY_RESPONSE_TO_ANTIGENIC_STIMULUS		33	-0.531969	-1.48255	0.0382695	0.403758	1	1227	tags=30%, list=9%, signal=33%	HeterovsU937	neg
															GO_T_HELPER_2_CELL_DIFFERENTIATION	GO_T_HELPER_2_CELL_DIFFERENTIATION		11	-0.658999	-1.48378	0.0719557	0.404059	1	2203	tags=45%, list=16%, signal=54%	HeterovsU937	neg
															GO_POSITIVE_REGULATION_OF_LEUKOCYTE_MEDIATED_IMMUNITY	GO_POSITIVE_REGULATION_OF_LEUKOCYTE_MEDIATED_IMMUNITY		88	-0.447724	-1.48439	0.0228758	0.404149	1	1476	tags=19%, list=11%, signal=22%	HeterovsU937	neg
															GO_INTERFERON_GAMMA_PRODUCTION	GO_INTERFERON_GAMMA_PRODUCTION		57	-0.48753	-1.48471	0.0290792	0.405016	1	2570	tags=42%, list=19%, signal=52%	HeterovsU937	neg
															GO_CELLULAR_COMPONENT_MAINTENANCE	GO_CELLULAR_COMPONENT_MAINTENANCE	Details ...	44	-0.641955	-1.70165	0.0035545	0.405287	1	2088	tags=41%, list=15%, signal=48%	HomovsU937	neg
															GO_REGULATION_OF_CATION_CHANNEL_ACTIVITY	GO_REGULATION_OF_CATION_CHANNEL_ACTIVITY	Details ...	93	-0.595095	-1.71087	0.00108814	0.406087	1	1601	tags=29%, list=12%, signal=33%	HomovsU937	neg
															GO_POSITIVE_REGULATION_OF_CYTOKINE_SECRETION	GO_POSITIVE_REGULATION_OF_CYTOKINE_SECRETION		37	-0.520701	-1.481	0.0498392	0.406096	1	1486	tags=27%, list=11%, signal=30%	HeterovsU937	neg
															GO_REGULATION_OF_POSTSYNAPSE_ORGANIZATION	GO_REGULATION_OF_POSTSYNAPSE_ORGANIZATION	Details ...	66	-0.585773	-1.83188	0.00168634	0.407348	0.991	2389	tags=44%, list=18%, signal=53%	HeterovsU937	neg
															GO_NEPHRON_MORPHOGENESIS	GO_NEPHRON_MORPHOGENESIS	Details ...	35	-0.686629	-1.6476	0.00120192	0.408603	1	1810	tags=29%, list=13%, signal=33%	HomovsHetero	neg
															GO_NEGATIVE_REGULATION_OF_PEPTIDASE_ACTIVITY	GO_NEGATIVE_REGULATION_OF_PEPTIDASE_ACTIVITY		122	-0.450363	-1.56177	0	0.354207	1	1587	tags=24%, list=12%, signal=27%	HeterovsU937	neg
															GO_GERMINAL_CENTER_FORMATION	GO_GERMINAL_CENTER_FORMATION		13	-0.650906	-1.47772	0.0709091	0.41318	1	874	tags=31%, list=6%, signal=33%	HeterovsU937	neg
															GO_VENTRICULAR_CARDIAC_MUSCLE_CELL_ACTION_POTENTIAL	GO_VENTRICULAR_CARDIAC_MUSCLE_CELL_ACTION_POTENTIAL	Details ...	21	-0.729464	-1.63406	0.0148448	0.413767	1	1207	tags=38%, list=9%, signal=42%	HomovsHetero	neg
															GO_RENAL_TUBULE_DEVELOPMENT	GO_RENAL_TUBULE_DEVELOPMENT	Details ...	45	-0.655107	-1.63247	0.00603136	0.414086	1	579	tags=20%, list=4%, signal=21%	HomovsHetero	neg
															GO_SKIN_EPIDERMIS_DEVELOPMENT	GO_SKIN_EPIDERMIS_DEVELOPMENT		49	-0.637512	-1.60932	0.00812065	0.414732	1	812	tags=18%, list=6%, signal=19%	HomovsHetero	neg
															GO_REGULATION_OF_LEUKOCYTE_DEGRANULATION	GO_REGULATION_OF_LEUKOCYTE_DEGRANULATION		34	-0.533892	-1.47647	0.056314	0.414872	1	3145	tags=41%, list=23%, signal=53%	HeterovsU937	neg
															GO_REGULATION_OF_GRANULOCYTE_CHEMOTAXIS	GO_REGULATION_OF_GRANULOCYTE_CHEMOTAXIS	Details ...	28	-0.674299	-1.83795	0.0069808	0.414959	0.988	1735	tags=39%, list=13%, signal=45%	HeterovsU937	neg
															GO_ERK1_AND_ERK2_CASCADE	GO_ERK1_AND_ERK2_CASCADE		160	-0.413081	-1.47503	0.0120301	0.415326	1	2194	tags=28%, list=16%, signal=33%	HeterovsU937	neg
															GO_ACTIN_MEDIATED_CELL_CONTRACTION	GO_ACTIN_MEDIATED_CELL_CONTRACTION		57	-0.630261	-1.62828	0.00229621	0.415336	1	1207	tags=26%, list=9%, signal=29%	HomovsHetero	neg
															GO_RESPONSE_TO_ACTIVITY	GO_RESPONSE_TO_ACTIVITY		47	-0.485676	-1.47522	0.0513245	0.416472	1	244	tags=6%, list=2%, signal=6%	HeterovsU937	neg
															GO_NEGATIVE_REGULATION_OF_PEPTIDYL_TYROSINE_PHOSPHORYLATION	GO_NEGATIVE_REGULATION_OF_PEPTIDYL_TYROSINE_PHOSPHORYLATION	Details ...	38	0.528213	1.82707	0	0.431714	0.963	3087	tags=45%, list=23%, signal=58%	HomovsHetero	pos
															GO_NEGATIVE_REGULATION_OF_VASCULATURE_DEVELOPMENT	GO_NEGATIVE_REGULATION_OF_VASCULATURE_DEVELOPMENT		72	-0.62776	-1.62909	0.0010846	0.418445	1	1563	tags=32%, list=12%, signal=36%	HomovsHetero	neg
															GO_NEGATIVE_REGULATION_OF_PHOSPHATIDYLINOSITOL_3_KINASE_SIGNALING	GO_NEGATIVE_REGULATION_OF_PHOSPHATIDYLINOSITOL_3_KINASE_SIGNALING	Details ...	12	0.70145	1.78047	0.016835	0.418462	0.994	1268	tags=50%, list=9%, signal=55%	HomovsHetero	pos
															GO_POSITIVE_REGULATION_OF_BLOOD_PRESSURE	GO_POSITIVE_REGULATION_OF_BLOOD_PRESSURE		13	-0.738308	-1.62059	0.0172662	0.418555	1	57	tags=15%, list=0%, signal=15%	HomovsU937	neg
															GO_COCHLEA_DEVELOPMENT	GO_COCHLEA_DEVELOPMENT		24	-0.697602	-1.59761	0.0119681	0.419177	1	451	tags=25%, list=3%, signal=26%	HomovsHetero	neg
															GO_POSITIVE_REGULATION_OF_ENDOTHELIAL_CELL_PROLIFERATION	GO_POSITIVE_REGULATION_OF_ENDOTHELIAL_CELL_PROLIFERATION		53	-0.629228	-1.60073	0.00921659	0.419254	1	1050	tags=19%, list=8%, signal=20%	HomovsHetero	neg
															GO_EXTRACELLULAR_MATRIX_DISASSEMBLY	GO_EXTRACELLULAR_MATRIX_DISASSEMBLY		45	-0.649396	-1.60964	0.00698487	0.419349	1	2039	tags=33%, list=15%, signal=39%	HomovsHetero	neg
															GO_POSTSYNAPTIC_SPECIALIZATION_ASSEMBLY	GO_POSTSYNAPTIC_SPECIALIZATION_ASSEMBLY		11	-0.779245	-1.61916	0.0264317	0.419386	1	1553	tags=55%, list=11%, signal=62%	HomovsU937	neg
															GO_NEGATIVE_REGULATION_OF_ATP_METABOLIC_PROCESS	GO_NEGATIVE_REGULATION_OF_ATP_METABOLIC_PROCESS		16	-0.727276	-1.61551	0.0107383	0.419524	1	746	tags=25%, list=5%, signal=26%	HomovsU937	neg
															GO_NEGATIVE_REGULATION_OF_PROTEIN_SERINE_THREONINE_KINASE_ACTIVITY	GO_NEGATIVE_REGULATION_OF_PROTEIN_SERINE_THREONINE_KINASE_ACTIVITY		101	0.337139	1.39251	0	0.676928	1	1515	tags=27%, list=11%, signal=30%	HomovsHetero	pos
															GO_SENSORY_PERCEPTION_OF_TEMPERATURE_STIMULUS	GO_SENSORY_PERCEPTION_OF_TEMPERATURE_STIMULUS		11	-0.66285	-1.46999	0.0706897	0.420771	1	3502	tags=64%, list=26%, signal=86%	HeterovsU937	neg
															GO_OSTEOBLAST_PROLIFERATION	GO_OSTEOBLAST_PROLIFERATION		15	-0.760962	-1.6069	0.0163265	0.421542	1	600	tags=20%, list=4%, signal=21%	HomovsHetero	neg
															GO_POSITIVE_REGULATION_OF_NATURAL_KILLER_CELL_MEDIATED_CYTOTOXICITY	GO_POSITIVE_REGULATION_OF_NATURAL_KILLER_CELL_MEDIATED_CYTOTOXICITY		13	-0.640684	-1.46901	0.0819113	0.421693	1	4	tags=8%, list=0%, signal=8%	HeterovsU937	neg
															GO_REGULATION_OF_TISSUE_REMODELING	GO_REGULATION_OF_TISSUE_REMODELING		43	-0.502168	-1.47017	0.0398671	0.421877	1	1332	tags=28%, list=10%, signal=31%	HeterovsU937	neg
															GO_NEGATIVE_REGULATION_OF_NIK_NF_KAPPAB_SIGNALING	GO_NEGATIVE_REGULATION_OF_NIK_NF_KAPPAB_SIGNALING		17	-0.593596	-1.46823	0.078853	0.422304	1	966	tags=29%, list=7%, signal=32%	HeterovsU937	neg
															GO_COLLAGEN_METABOLIC_PROCESS	GO_COLLAGEN_METABOLIC_PROCESS		55	-0.628965	-1.61025	0.00456621	0.422349	1	1853	tags=27%, list=14%, signal=31%	HomovsHetero	neg
															GO_ANTIMICROBIAL_HUMORAL_RESPONSE	GO_ANTIMICROBIAL_HUMORAL_RESPONSE		31	-0.677474	-1.59792	0.011194	0.422478	1	642	tags=26%, list=5%, signal=27%	HomovsHetero	neg
															GO_REGULATION_OF_SIGNALING_RECEPTOR_ACTIVITY	GO_REGULATION_OF_SIGNALING_RECEPTOR_ACTIVITY		84	-0.447411	-1.46622	0.0185759	0.422591	1	1431	tags=31%, list=11%, signal=34%	HeterovsU937	neg
															GO_POSITIVE_REGULATION_OF_CHEMOTAXIS	GO_POSITIVE_REGULATION_OF_CHEMOTAXIS		71	-0.57037	-1.61735	0.00111483	0.422608	1	1471	tags=28%, list=11%, signal=31%	HomovsU937	neg
															GO_MODIFICATION_OF_POSTSYNAPTIC_STRUCTURE	GO_MODIFICATION_OF_POSTSYNAPTIC_STRUCTURE		13	-0.634361	-1.46555	0.0868794	0.422737	1	1066	tags=23%, list=8%, signal=25%	HeterovsU937	neg
															GO_REGULATION_OF_ESTABLISHMENT_OR_MAINTENANCE_OF_CELL_POLARITY	GO_REGULATION_OF_ESTABLISHMENT_OR_MAINTENANCE_OF_CELL_POLARITY	Details ...	19	0.729554	1.88792	0.00231481	0.42276	0.977	20	tags=5%, list=0%, signal=5%	HeterovsU937	pos
															GO_REGULATION_OF_MACROPHAGE_CHEMOTAXIS	GO_REGULATION_OF_MACROPHAGE_CHEMOTAXIS		14	-0.743093	-1.61601	0.0177253	0.422774	1	936	tags=29%, list=7%, signal=31%	HomovsU937	neg
															GO_RETINA_VASCULATURE_DEVELOPMENT_IN_CAMERA_TYPE_EYE	GO_RETINA_VASCULATURE_DEVELOPMENT_IN_CAMERA_TYPE_EYE		10	-0.788906	-1.62227	0.0233236	0.422821	1	137	tags=20%, list=1%, signal=20%	HomovsU937	neg
															GO_POSITIVE_REGULATION_OF_EPITHELIAL_CELL_PROLIFERATION	GO_POSITIVE_REGULATION_OF_EPITHELIAL_CELL_PROLIFERATION		100	-0.592189	-1.59889	0.00212766	0.422942	1	1198	tags=17%, list=9%, signal=19%	HomovsHetero	neg
															GO_COLLAGEN_CATABOLIC_PROCESS	GO_COLLAGEN_CATABOLIC_PROCESS		22	-0.717862	-1.61136	0.0139276	0.422943	1	796	tags=23%, list=6%, signal=24%	HomovsHetero	neg
															GO_MACROPHAGE_CYTOKINE_PRODUCTION	GO_MACROPHAGE_CYTOKINE_PRODUCTION		12	-0.761169	-1.61348	0.0134529	0.423065	1	615	tags=33%, list=5%, signal=35%	HomovsU937	neg
															GO_NEURONAL_ACTION_POTENTIAL	GO_NEURONAL_ACTION_POTENTIAL	Details ...	11	0.760031	1.96155	0	0.512952	0.768	101	tags=36%, list=1%, signal=37%	HomovsU937	pos
															GO_POSITIVE_REGULATION_OF_INNATE_IMMUNE_RESPONSE	GO_POSITIVE_REGULATION_OF_INNATE_IMMUNE_RESPONSE		148	-0.410019	-1.46727	0.0141509	0.42311	1	2030	tags=18%, list=15%, signal=20%	HeterovsU937	neg
															GO_OLIGOSACCHARIDE_METABOLIC_PROCESS	GO_OLIGOSACCHARIDE_METABOLIC_PROCESS		29	-0.544884	-1.47026	0.0611916	0.423275	1	1856	tags=31%, list=14%, signal=36%	HeterovsU937	neg
															GO_MONOCARBOXYLIC_ACID_TRANSPORT	GO_MONOCARBOXYLIC_ACID_TRANSPORT		87	-0.444882	-1.46646	0.0295082	0.423623	1	2572	tags=33%, list=19%, signal=41%	HeterovsU937	neg
															GO_POSITIVE_REGULATION_OF_INTERLEUKIN_1_PRODUCTION	GO_POSITIVE_REGULATION_OF_INTERLEUKIN_1_PRODUCTION		40	-0.497459	-1.46459	0.053068	0.423649	1	2420	tags=38%, list=18%, signal=45%	HeterovsU937	neg
															GO_HEART_VALVE_DEVELOPMENT	GO_HEART_VALVE_DEVELOPMENT		36	-0.524204	-1.47068	0.0612245	0.423699	1	419	tags=17%, list=3%, signal=17%	HeterovsU937	neg
															GO_MATURE_B_CELL_DIFFERENTIATION_INVOLVED_IN_IMMUNE_RESPONSE	GO_MATURE_B_CELL_DIFFERENTIATION_INVOLVED_IN_IMMUNE_RESPONSE		15	-0.618032	-1.47103	0.0466321	0.424364	1	470	tags=20%, list=3%, signal=21%	HeterovsU937	neg
															GO_REGULATION_OF_CELLULAR_RESPIRATION	GO_REGULATION_OF_CELLULAR_RESPIRATION	Details ...	21	-0.720015	-1.7112	0.00540541	0.424541	1	230	tags=14%, list=2%, signal=15%	HomovsU937	neg
															GO_FORMATION_OF_PRIMARY_GERM_LAYER	GO_FORMATION_OF_PRIMARY_GERM_LAYER		68	-0.616063	-1.60073	0.004329	0.424907	1	1741	tags=28%, list=13%, signal=32%	HomovsHetero	neg
															GO_FOREBRAIN_NEURON_DIFFERENTIATION	GO_FOREBRAIN_NEURON_DIFFERENTIATION		21	-0.707995	-1.60281	0.0200535	0.425377	1	936	tags=29%, list=7%, signal=31%	HomovsHetero	neg
															GO_REGULATION_OF_RENAL_SYSTEM_PROCESS	GO_REGULATION_OF_RENAL_SYSTEM_PROCESS		12	-0.77706	-1.60508	0.0190058	0.42562	1	358	tags=33%, list=3%, signal=34%	HomovsHetero	neg
															GO_EPITHELIAL_CELL_DEVELOPMENT	GO_EPITHELIAL_CELL_DEVELOPMENT		133	-0.419872	-1.46141	0.0140406	0.425835	1	2090	tags=26%, list=15%, signal=30%	HeterovsU937	neg
															GO_NEUROTRANSMITTER_UPTAKE	GO_NEUROTRANSMITTER_UPTAKE	Details ...	19	0.742859	1.91213	0	0.499726	0.935	666	tags=21%, list=5%, signal=22%	HeterovsU937	pos
															GO_RETINA_DEVELOPMENT_IN_CAMERA_TYPE_EYE	GO_RETINA_DEVELOPMENT_IN_CAMERA_TYPE_EYE		80	-0.596326	-1.59407	0.00218579	0.426618	1	1494	tags=24%, list=11%, signal=27%	HomovsHetero	neg
															GO_REGULATION_OF_CELLULAR_RESPIRATION	GO_REGULATION_OF_CELLULAR_RESPIRATION		21	-0.710414	-1.60144	0.0175202	0.426845	1	372	tags=14%, list=3%, signal=15%	HomovsHetero	neg
															GO_REGULATION_OF_CARDIAC_MUSCLE_CONTRACTION	GO_REGULATION_OF_CARDIAC_MUSCLE_CONTRACTION		40	-0.502522	-1.46266	0.0521008	0.427163	1	1384	tags=28%, list=10%, signal=31%	HeterovsU937	neg
															GO_FOREBRAIN_GENERATION_OF_NEURONS	GO_FOREBRAIN_GENERATION_OF_NEURONS		27	-0.698273	-1.61176	0.0128535	0.427266	1	1340	tags=30%, list=10%, signal=33%	HomovsHetero	neg
															GO_POSITIVE_REGULATION_OF_RESPONSE_TO_BIOTIC_STIMULUS	GO_POSITIVE_REGULATION_OF_RESPONSE_TO_BIOTIC_STIMULUS		171	-0.401994	-1.46147	0.00890208	0.427271	1	1939	tags=17%, list=14%, signal=20%	HeterovsU937	neg
															GO_EPITHELIAL_CELL_MORPHOGENESIS	GO_EPITHELIAL_CELL_MORPHOGENESIS		22	-0.708535	-1.59482	0.0205656	0.42838	1	1353	tags=32%, list=10%, signal=35%	HomovsHetero	neg
															GO_POSITIVE_REGULATION_OF_NATURAL_KILLER_CELL_MEDIATED_IMMUNITY	GO_POSITIVE_REGULATION_OF_NATURAL_KILLER_CELL_MEDIATED_IMMUNITY		14	-0.618446	-1.46163	0.0820513	0.428383	1	4	tags=7%, list=0%, signal=7%	HeterovsU937	neg
															GO_KIDNEY_MESENCHYME_DEVELOPMENT	GO_KIDNEY_MESENCHYME_DEVELOPMENT		11	-0.794717	-1.60337	0.0179372	0.428615	1	250	tags=18%, list=2%, signal=19%	HomovsHetero	neg
															GO_NEGATIVE_REGULATION_OF_ATP_METABOLIC_PROCESS	GO_NEGATIVE_REGULATION_OF_ATP_METABOLIC_PROCESS		16	-0.752631	-1.58483	0.0108548	0.428646	1	592	tags=25%, list=4%, signal=26%	HomovsHetero	neg
															GO_RESPONSE_TO_MUSCLE_ACTIVITY	GO_RESPONSE_TO_MUSCLE_ACTIVITY	Details ...	14	-0.774851	-1.71377	0.0057971	0.429107	1	230	tags=21%, list=2%, signal=22%	HomovsU937	neg
															GO_ACTIN_FILAMENT_BASED_MOVEMENT	GO_ACTIN_FILAMENT_BASED_MOVEMENT		78	-0.61581	-1.62439	0.00218103	0.429598	1	1207	tags=22%, list=9%, signal=24%	HomovsHetero	neg
															GO_ADULT_BEHAVIOR	GO_ADULT_BEHAVIOR		71	-0.619326	-1.61892	0.00323276	0.430047	1	1565	tags=27%, list=12%, signal=30%	HomovsHetero	neg
															GO_POSITIVE_REGULATION_OF_CELL_DIVISION	GO_POSITIVE_REGULATION_OF_CELL_DIVISION		49	-0.638208	-1.62145	0.00566251	0.430249	1	720	tags=18%, list=5%, signal=19%	HomovsHetero	neg
															GO_NEUTROPHIL_CHEMOTAXIS	GO_NEUTROPHIL_CHEMOTAXIS	Details ...	47	-0.625316	-1.86169	0	0.902121	0.962	2030	tags=43%, list=15%, signal=50%	HeterovsU937	neg
															GO_B_CELL_MEDIATED_IMMUNITY	GO_B_CELL_MEDIATED_IMMUNITY		79	-0.601705	-1.6227	0.00108696	0.430929	1	672	tags=18%, list=5%, signal=19%	HomovsHetero	neg
															GO_NUCLEOSOME_ORGANIZATION	GO_NUCLEOSOME_ORGANIZATION		80	0.412025	1.59985	0	0.648626	1	3831	tags=50%, list=28%, signal=69%	HomovsU937	pos
															GO_DETECTION_OF_ABIOTIC_STIMULUS	GO_DETECTION_OF_ABIOTIC_STIMULUS		63	-0.621987	-1.61981	0.00555556	0.432587	1	1182	tags=24%, list=9%, signal=26%	HomovsHetero	neg
															GO_REGULATION_OF_NATURAL_KILLER_CELL_MEDIATED_IMMUNITY	GO_REGULATION_OF_NATURAL_KILLER_CELL_MEDIATED_IMMUNITY		25	-0.552306	-1.45826	0.0719178	0.432605	1	1486	tags=24%, list=11%, signal=27%	HeterovsU937	neg
															GO_MAMMARY_GLAND_EPITHELIUM_DEVELOPMENT	GO_MAMMARY_GLAND_EPITHELIUM_DEVELOPMENT		45	-0.651138	-1.58681	0.00816803	0.433217	1	1494	tags=24%, list=11%, signal=27%	HomovsHetero	neg
															GO_REGULATION_OF_KERATINOCYTE_PROLIFERATION	GO_REGULATION_OF_KERATINOCYTE_PROLIFERATION		14	-0.774185	-1.61187	0.012931	0.433399	1	75	tags=14%, list=1%, signal=14%	HomovsHetero	neg
															GO_REGULATION_OF_CHONDROCYTE_DIFFERENTIATION	GO_REGULATION_OF_CHONDROCYTE_DIFFERENTIATION		28	-0.670111	-1.58485	0.0154242	0.433422	1	1369	tags=29%, list=10%, signal=32%	HomovsHetero	neg
															GO_NEGATIVE_REGULATION_OF_PROTEIN_LOCALIZATION_TO_CELL_SURFACE	GO_NEGATIVE_REGULATION_OF_PROTEIN_LOCALIZATION_TO_CELL_SURFACE		11	-0.792853	-1.58577	0.0259542	0.433677	1	1419	tags=36%, list=10%, signal=41%	HomovsHetero	neg
															GO_MUSCLE_FILAMENT_SLIDING	GO_MUSCLE_FILAMENT_SLIDING	Details ...	14	0.706793	1.90061	0.00647249	0.43457	0.945	500	tags=29%, list=4%, signal=30%	HomovsU937	pos
															GO_REGULATION_OF_NEUROTRANSMITTER_RECEPTOR_ACTIVITY	GO_REGULATION_OF_NEUROTRANSMITTER_RECEPTOR_ACTIVITY		41	-0.659455	-1.61401	0.00583431	0.435722	1	1642	tags=34%, list=12%, signal=39%	HomovsHetero	neg
															GO_POSITIVE_REGULATION_OF_NEUROTRANSMITTER_TRANSPORT	GO_POSITIVE_REGULATION_OF_NEUROTRANSMITTER_TRANSPORT	Details ...	18	0.759949	1.90162	0.00234192	0.435914	0.958	583	tags=28%, list=4%, signal=29%	HeterovsU937	pos
															GO_DETECTION_OF_TEMPERATURE_STIMULUS_INVOLVED_IN_SENSORY_PERCEPTION	GO_DETECTION_OF_TEMPERATURE_STIMULUS_INVOLVED_IN_SENSORY_PERCEPTION		10	-0.656593	-1.45602	0.0940767	0.436796	1	3502	tags=60%, list=26%, signal=81%	HeterovsU937	neg
															GO_REGULATION_OF_PROTEIN_DEPOLYMERIZATION	GO_REGULATION_OF_PROTEIN_DEPOLYMERIZATION		64	-0.612683	-1.58699	0.00448431	0.437355	1	1413	tags=20%, list=10%, signal=23%	HomovsHetero	neg
															GO_GLUTAMATE_RECEPTOR_SIGNALING_PATHWAY	GO_GLUTAMATE_RECEPTOR_SIGNALING_PATHWAY		55	-0.629801	-1.58892	0.00565611	0.437861	1	1642	tags=35%, list=12%, signal=39%	HomovsHetero	neg
															GO_SKIN_DEVELOPMENT	GO_SKIN_DEVELOPMENT		130	-0.586722	-1.61212	0.00103734	0.43888	1	1026	tags=18%, list=8%, signal=19%	HomovsHetero	neg
															GO_CELL_CELL_JUNCTION_MAINTENANCE	GO_CELL_CELL_JUNCTION_MAINTENANCE		11	-0.828826	-1.61459	0.0166163	0.43974	1	1340	tags=64%, list=10%, signal=71%	HomovsHetero	neg
															GO_POSITIVE_CHEMOTAXIS	GO_POSITIVE_CHEMOTAXIS		26	-0.689887	-1.58756	0.0226969	0.439786	1	720	tags=31%, list=5%, signal=32%	HomovsHetero	neg
															GO_V_D_J_RECOMBINATION	GO_V_D_J_RECOMBINATION		13	-0.791536	-1.58945	0.0177253	0.440138	1	649	tags=15%, list=5%, signal=16%	HomovsHetero	neg
															GO_GASTRULATION	GO_GASTRULATION		108	-0.575636	-1.59021	0.0010395	0.441306	1	1741	tags=24%, list=13%, signal=27%	HomovsHetero	neg
															GO_PLASMINOGEN_ACTIVATION	GO_PLASMINOGEN_ACTIVATION		10	-0.669945	-1.45358	0.0896785	0.44175	1	1963	tags=60%, list=14%, signal=70%	HeterovsU937	neg
															GO_REGULATION_OF_EPIDERMAL_GROWTH_FACTOR_ACTIVATED_RECEPTOR_ACTIVITY	GO_REGULATION_OF_EPIDERMAL_GROWTH_FACTOR_ACTIVATED_RECEPTOR_ACTIVITY	Details ...	20	0.615621	1.78131	0.0111111	0.443002	0.994	1889	tags=30%, list=14%, signal=35%	HomovsHetero	pos
															GO_ACUTE_INFLAMMATORY_RESPONSE_TO_ANTIGENIC_STIMULUS	GO_ACUTE_INFLAMMATORY_RESPONSE_TO_ANTIGENIC_STIMULUS	Details ...	15	-0.76939	-1.71527	0.00435414	0.443073	1	1880	tags=53%, list=14%, signal=62%	HomovsU937	neg
															GO_LABYRINTHINE_LAYER_MORPHOGENESIS	GO_LABYRINTHINE_LAYER_MORPHOGENESIS		11	-0.775345	-1.56957	0.0301205	0.443121	1	982	tags=36%, list=7%, signal=39%	HomovsHetero	neg
															GO_B_CELL_HOMEOSTASIS	GO_B_CELL_HOMEOSTASIS	Details ...	25	0.576153	1.79676	0.00881057	0.443959	0.985	2509	tags=48%, list=18%, signal=59%	HomovsHetero	pos
															GO_REGULATION_OF_SYSTEMIC_ARTERIAL_BLOOD_PRESSURE	GO_REGULATION_OF_SYSTEMIC_ARTERIAL_BLOOD_PRESSURE		40	-0.509726	-1.45155	0.0601626	0.44556	1	1861	tags=38%, list=14%, signal=43%	HeterovsU937	neg
															GO_REGULATION_OF_HUMORAL_IMMUNE_RESPONSE	GO_REGULATION_OF_HUMORAL_IMMUNE_RESPONSE		30	-0.675093	-1.5797	0.0149254	0.446015	1	907	tags=37%, list=7%, signal=39%	HomovsHetero	neg
															GO_NEGATIVE_REGULATION_OF_IMMUNE_EFFECTOR_PROCESS	GO_NEGATIVE_REGULATION_OF_IMMUNE_EFFECTOR_PROCESS		81	-0.443432	-1.45007	0.0340357	0.446392	1	3101	tags=36%, list=23%, signal=46%	HeterovsU937	neg
															GO_REACTIVE_OXYGEN_SPECIES_BIOSYNTHETIC_PROCESS	GO_REACTIVE_OXYGEN_SPECIES_BIOSYNTHETIC_PROCESS		66	-0.456908	-1.44862	0.0467742	0.446825	1	2022	tags=30%, list=15%, signal=35%	HeterovsU937	neg
															GO_REGULATION_OF_MEMBRANE_INVAGINATION	GO_REGULATION_OF_MEMBRANE_INVAGINATION		12	-0.642244	-1.45046	0.0977702	0.446929	1	1404	tags=33%, list=10%, signal=37%	HeterovsU937	neg
															GO_MUSCLE_HYPERTROPHY	GO_MUSCLE_HYPERTROPHY		52	-0.47109	-1.44733	0.0489511	0.447171	1	362	tags=8%, list=3%, signal=8%	HeterovsU937	neg
															GO_MORPHOGENESIS_OF_AN_EPITHELIAL_FOLD	GO_MORPHOGENESIS_OF_AN_EPITHELIAL_FOLD		11	-0.786231	-1.57224	0.021374	0.447292	1	63	tags=18%, list=0%, signal=18%	HomovsHetero	neg
															GO_NEGATIVE_REGULATION_OF_SPROUTING_ANGIOGENESIS	GO_NEGATIVE_REGULATION_OF_SPROUTING_ANGIOGENESIS		14	-0.750348	-1.58039	0.0318119	0.447349	1	13	tags=14%, list=0%, signal=14%	HomovsHetero	neg
															GO_METANEPHRIC_EPITHELIUM_DEVELOPMENT	GO_METANEPHRIC_EPITHELIUM_DEVELOPMENT		10	-0.799728	-1.56958	0.0308642	0.44742	1	1585	tags=50%, list=12%, signal=57%	HomovsHetero	neg
															GO_RESPONSE_TO_OXYGEN_RADICAL	GO_RESPONSE_TO_OXYGEN_RADICAL		20	-0.559479	-1.449	0.0801394	0.447423	1	404	tags=15%, list=3%, signal=15%	HeterovsU937	neg
															GO_REGULATION_OF_POTASSIUM_ION_TRANSPORT	GO_REGULATION_OF_POTASSIUM_ION_TRANSPORT		50	-0.622543	-1.57127	0.0116959	0.447588	1	1141	tags=22%, list=8%, signal=24%	HomovsHetero	neg
															GO_PLATELET_DEGRANULATION	GO_PLATELET_DEGRANULATION		75	-0.446765	-1.44773	0.0449438	0.447643	1	1317	tags=20%, list=10%, signal=22%	HeterovsU937	neg
															GO_NEGATIVE_REGULATION_OF_CYTOKINE_PRODUCTION_INVOLVED_IN_INFLAMMATORY_RESPONSE	GO_NEGATIVE_REGULATION_OF_CYTOKINE_PRODUCTION_INVOLVED_IN_INFLAMMATORY_RESPONSE		12	-0.646747	-1.4447	0.0855148	0.448346	1	1460	tags=33%, list=11%, signal=37%	HeterovsU937	neg
															GO_CALCIUM_ION_TRANSMEMBRANE_TRANSPORT	GO_CALCIUM_ION_TRANSMEMBRANE_TRANSPORT		167	-0.398906	-1.44633	0.0184332	0.448459	1	2447	tags=26%, list=18%, signal=32%	HeterovsU937	neg
															GO_ANTIBACTERIAL_HUMORAL_RESPONSE	GO_ANTIBACTERIAL_HUMORAL_RESPONSE		11	-0.788159	-1.56606	0.0191458	0.448614	1	642	tags=36%, list=5%, signal=38%	HomovsHetero	neg
															GO_CARDIAC_MUSCLE_CELL_ACTION_POTENTIAL_INVOLVED_IN_CONTRACTION	GO_CARDIAC_MUSCLE_CELL_ACTION_POTENTIAL_INVOLVED_IN_CONTRACTION		26	-0.682981	-1.5702	0.0203304	0.448714	1	1207	tags=35%, list=9%, signal=38%	HomovsHetero	neg
															GO_ODONTOGENESIS	GO_ODONTOGENESIS	Details ...	60	-0.711022	-1.83437	0	0.200161	0.361	1466	tags=32%, list=11%, signal=35%	HomovsHetero	neg
															GO_NEGATIVE_REGULATION_OF_CELL_MIGRATION_INVOLVED_IN_SPROUTING_ANGIOGENESIS	GO_NEGATIVE_REGULATION_OF_CELL_MIGRATION_INVOLVED_IN_SPROUTING_ANGIOGENESIS		10	-0.66894	-1.44479	0.0943739	0.449702	1	1552	tags=30%, list=11%, signal=34%	HeterovsU937	neg
															GO_POSITIVE_REGULATION_OF_COAGULATION	GO_POSITIVE_REGULATION_OF_COAGULATION		15	-0.719627	-1.60684	0.0253879	0.449819	1	2744	tags=53%, list=20%, signal=67%	HomovsU937	neg
															GO_RESPONSE_TO_IMMOBILIZATION_STRESS	GO_RESPONSE_TO_IMMOBILIZATION_STRESS		15	-0.601244	-1.44121	0.0886525	0.449932	1	2490	tags=47%, list=18%, signal=57%	HeterovsU937	neg
															GO_CARDIAC_MUSCLE_CELL_CONTRACTION	GO_CARDIAC_MUSCLE_CELL_CONTRACTION		36	-0.647694	-1.57255	0.0193705	0.450275	1	1207	tags=31%, list=9%, signal=33%	HomovsHetero	neg
															GO_DETECTION_OF_ABIOTIC_STIMULUS	GO_DETECTION_OF_ABIOTIC_STIMULUS		63	-0.462291	-1.44168	0.0491803	0.450279	1	2461	tags=33%, list=18%, signal=41%	HeterovsU937	neg
															GO_WOUND_HEALING_SPREADING_OF_EPIDERMAL_CELLS	GO_WOUND_HEALING_SPREADING_OF_EPIDERMAL_CELLS		10	-0.774677	-1.60549	0.015873	0.450846	1	803	tags=20%, list=6%, signal=21%	HomovsU937	neg
															GO_POSITIVE_REGULATION_OF_G_PROTEIN_COUPLED_RECEPTOR_SIGNALING_PATHWAY	GO_POSITIVE_REGULATION_OF_G_PROTEIN_COUPLED_RECEPTOR_SIGNALING_PATHWAY		12	-0.643484	-1.4449	0.0923077	0.450936	1	2742	tags=58%, list=20%, signal=73%	HeterovsU937	neg
															GO_NEGATIVE_REGULATION_OF_CATION_CHANNEL_ACTIVITY	GO_NEGATIVE_REGULATION_OF_CATION_CHANNEL_ACTIVITY		22	-0.559428	-1.4425	0.0767947	0.451216	1	1735	tags=36%, list=13%, signal=42%	HeterovsU937	neg
															GO_MEMBRANE_DEPOLARIZATION_DURING_CARDIAC_MUSCLE_CELL_ACTION_POTENTIAL	GO_MEMBRANE_DEPOLARIZATION_DURING_CARDIAC_MUSCLE_CELL_ACTION_POTENTIAL		10	-0.670042	-1.44303	0.092081	0.451403	1	2360	tags=60%, list=17%, signal=73%	HeterovsU937	neg
															GO_NEGATIVE_REGULATION_OF_RESPONSE_TO_WOUNDING	GO_NEGATIVE_REGULATION_OF_RESPONSE_TO_WOUNDING		47	-0.481689	-1.44184	0.0558376	0.451443	1	2177	tags=36%, list=16%, signal=43%	HeterovsU937	neg
															GO_POSITIVE_REGULATION_OF_MUSCLE_CONTRACTION	GO_POSITIVE_REGULATION_OF_MUSCLE_CONTRACTION		22	-0.702478	-1.56621	0.0290237	0.452058	1	1174	tags=32%, list=9%, signal=35%	HomovsHetero	neg
															GO_APPENDAGE_MORPHOGENESIS	GO_APPENDAGE_MORPHOGENESIS		77	-0.586867	-1.5739	0.00424178	0.452296	1	524	tags=12%, list=4%, signal=12%	HomovsHetero	neg
															GO_REGULATION_OF_MYOBLAST_DIFFERENTIATION	GO_REGULATION_OF_MYOBLAST_DIFFERENTIATION		23	-0.564879	-1.43952	0.0643478	0.452909	1	2090	tags=35%, list=15%, signal=41%	HeterovsU937	neg
															GO_REGULATION_OF_CILIUM_MOVEMENT	GO_REGULATION_OF_CILIUM_MOVEMENT		15	-0.605456	-1.43875	0.08726	0.45334	1	2461	tags=40%, list=18%, signal=49%	HeterovsU937	neg
															GO_AORTA_DEVELOPMENT	GO_AORTA_DEVELOPMENT		34	-0.658707	-1.56167	0.0177515	0.453917	1	829	tags=21%, list=6%, signal=22%	HomovsHetero	neg
															GO_GLYCOPROTEIN_CATABOLIC_PROCESS	GO_GLYCOPROTEIN_CATABOLIC_PROCESS		14	-0.751784	-1.56417	0.0225352	0.454012	1	613	tags=14%, list=5%, signal=15%	HomovsHetero	neg
															GO_STEM_CELL_DIVISION	GO_STEM_CELL_DIVISION		31	-0.65809	-1.56226	0.0248139	0.454998	1	943	tags=19%, list=7%, signal=21%	HomovsHetero	neg
															GO_POSITIVE_REGULATION_OF_APOPTOTIC_SIGNALING_PATHWAY	GO_POSITIVE_REGULATION_OF_APOPTOTIC_SIGNALING_PATHWAY		134	0.340741	1.45282	0	0.674743	1	1321	tags=16%, list=10%, signal=17%	HomovsU937	pos
															GO_NEGATIVE_REGULATION_OF_OXIDATIVE_STRESS_INDUCED_NEURON_DEATH	GO_NEGATIVE_REGULATION_OF_OXIDATIVE_STRESS_INDUCED_NEURON_DEATH		17	-0.728861	-1.5663	0.0232558	0.455844	1	303	tags=12%, list=2%, signal=12%	HomovsHetero	neg
															GO_EPITHELIAL_CELL_CELL_ADHESION	GO_EPITHELIAL_CELL_CELL_ADHESION		11	-0.776053	-1.55285	0.0120664	0.455919	1	1514	tags=55%, list=11%, signal=61%	HomovsHetero	neg
															GO_REGULATION_OF_LIPID_STORAGE	GO_REGULATION_OF_LIPID_STORAGE		36	-0.512072	-1.43528	0.0655172	0.456525	1	1371	tags=19%, list=10%, signal=22%	HeterovsU937	neg
															GO_POSITIVE_REGULATION_OF_VIRAL_TRANSCRIPTION	GO_POSITIVE_REGULATION_OF_VIRAL_TRANSCRIPTION	Details ...	37	0.534891	1.82815	0.00537634	0.456558	0.996	4355	tags=46%, list=32%, signal=67%	HomovsU937	pos
															GO_REGULATION_OF_PLASMA_LIPOPROTEIN_PARTICLE_LEVELS	GO_REGULATION_OF_PLASMA_LIPOPROTEIN_PARTICLE_LEVELS		55	-0.465106	-1.43584	0.0544554	0.456626	1	2119	tags=20%, list=16%, signal=24%	HeterovsU937	neg
															GO_POSITIVE_REGULATION_OF_POTASSIUM_ION_TRANSMEMBRANE_TRANSPORTER_ACTIVITY	GO_POSITIVE_REGULATION_OF_POTASSIUM_ION_TRANSMEMBRANE_TRANSPORTER_ACTIVITY		11	-0.802085	-1.5739	0.0178571	0.457057	1	920	tags=36%, list=7%, signal=39%	HomovsHetero	neg
															GO_REGULATION_OF_AMINO_ACID_TRANSPORT	GO_REGULATION_OF_AMINO_ACID_TRANSPORT		14	-0.614034	-1.43616	0.0887246	0.457366	1	2062	tags=36%, list=15%, signal=42%	HeterovsU937	neg
															GO_POSITIVE_REGULATION_OF_ERK1_AND_ERK2_CASCADE	GO_POSITIVE_REGULATION_OF_ERK1_AND_ERK2_CASCADE		93	-0.43234	-1.4367	0.0337621	0.457454	1	2140	tags=26%, list=16%, signal=30%	HeterovsU937	neg
															GO_MOLTING_CYCLE	GO_MOLTING_CYCLE		57	-0.604733	-1.56253	0.0159635	0.457898	1	812	tags=16%, list=6%, signal=17%	HomovsHetero	neg
															GO_NEUROBLAST_PROLIFERATION	GO_NEUROBLAST_PROLIFERATION		36	-0.63817	-1.55395	0.0144404	0.457978	1	1271	tags=22%, list=9%, signal=24%	HomovsHetero	neg
															GO_CENTRAL_NERVOUS_SYSTEM_NEURON_DEVELOPMENT	GO_CENTRAL_NERVOUS_SYSTEM_NEURON_DEVELOPMENT		46	-0.613242	-1.5531	0.0164127	0.458337	1	936	tags=17%, list=7%, signal=19%	HomovsHetero	neg
															GO_OSTEOCLAST_DEVELOPMENT	GO_OSTEOCLAST_DEVELOPMENT		16	-0.597696	-1.43403	0.112084	0.45852	1	1105	tags=38%, list=8%, signal=41%	HeterovsU937	neg
															GO_PEPTIDYL_THREONINE_DEPHOSPHORYLATION	GO_PEPTIDYL_THREONINE_DEPHOSPHORYLATION	Details ...	15	0.679707	1.78522	0.013289	0.458524	0.993	2303	tags=67%, list=17%, signal=80%	HomovsHetero	pos
															GO_MESODERMAL_CELL_DIFFERENTIATION	GO_MESODERMAL_CELL_DIFFERENTIATION		12	-0.775403	-1.57535	0.0248902	0.458775	1	761	tags=25%, list=6%, signal=26%	HomovsHetero	neg
															GO_POSITIVE_REGULATION_OF_ENDOTHELIAL_CELL_DIFFERENTIATION	GO_POSITIVE_REGULATION_OF_ENDOTHELIAL_CELL_DIFFERENTIATION		11	-0.787464	-1.57446	0.0236337	0.45906	1	108	tags=18%, list=1%, signal=18%	HomovsHetero	neg
															GO_POSITIVE_REGULATION_OF_IMMUNE_EFFECTOR_PROCESS	GO_POSITIVE_REGULATION_OF_IMMUNE_EFFECTOR_PROCESS	Details ...	138	-0.499119	-1.73265	0	0.286953	1	1476	tags=20%, list=11%, signal=23%	HeterovsU937	neg
															GO_PROTEIN_KINASE_A_SIGNALING	GO_PROTEIN_KINASE_A_SIGNALING		19	-0.708994	-1.55074	0.0307487	0.459156	1	132	tags=11%, list=1%, signal=11%	HomovsHetero	neg
															GO_NEPHRON_EPITHELIUM_DEVELOPMENT	GO_NEPHRON_EPITHELIUM_DEVELOPMENT		52	-0.605986	-1.55443	0.012761	0.459175	1	579	tags=15%, list=4%, signal=16%	HomovsHetero	neg
															GO_REGULATION_OF_MACROPHAGE_MIGRATION	GO_REGULATION_OF_MACROPHAGE_MIGRATION		20	-0.708774	-1.57612	0.0196335	0.459674	1	1340	tags=35%, list=10%, signal=39%	HomovsHetero	neg
															GO_POSITIVE_REGULATION_OF_IMMUNE_EFFECTOR_PROCESS	GO_POSITIVE_REGULATION_OF_IMMUNE_EFFECTOR_PROCESS		138	0.350268	1.52975	0	0.74734	1	1156	tags=20%, list=9%, signal=22%	HomovsHetero	pos
															GO_CHONDROCYTE_DIFFERENTIATION	GO_CHONDROCYTE_DIFFERENTIATION		59	-0.593937	-1.55565	0.0147392	0.460473	1	843	tags=17%, list=6%, signal=18%	HomovsHetero	neg
															GO_AXO_DENDRITIC_PROTEIN_TRANSPORT	GO_AXO_DENDRITIC_PROTEIN_TRANSPORT		12	-0.625093	-1.432	0.0964467	0.461025	1	1077	tags=25%, list=8%, signal=27%	HeterovsU937	neg
															GO_NEGATIVE_REGULATION_OF_NECROTIC_CELL_DEATH	GO_NEGATIVE_REGULATION_OF_NECROTIC_CELL_DEATH		10	-0.671237	-1.43139	0.0966011	0.461103	1	237	tags=20%, list=2%, signal=20%	HeterovsU937	neg
															GO_CD4_POSITIVE_ALPHA_BETA_T_CELL_ACTIVATION	GO_CD4_POSITIVE_ALPHA_BETA_T_CELL_ACTIVATION		58	-0.462825	-1.43238	0.0556492	0.461569	1	2782	tags=33%, list=20%, signal=41%	HeterovsU937	neg
															GO_TEMPERATURE_HOMEOSTASIS	GO_TEMPERATURE_HOMEOSTASIS		105	-0.422051	-1.42953	0.0197368	0.461593	1	2722	tags=29%, list=20%, signal=35%	HeterovsU937	neg
															GO_REGULATION_OF_CARTILAGE_DEVELOPMENT	GO_REGULATION_OF_CARTILAGE_DEVELOPMENT		37	-0.640154	-1.55462	0.0188457	0.462039	1	1369	tags=24%, list=10%, signal=27%	HomovsHetero	neg
															GO_RETINA_VASCULATURE_DEVELOPMENT_IN_CAMERA_TYPE_EYE	GO_RETINA_VASCULATURE_DEVELOPMENT_IN_CAMERA_TYPE_EYE		10	-0.653038	-1.42988	0.0848896	0.462183	1	1211	tags=30%, list=9%, signal=33%	HeterovsU937	neg
															GO_CELL_CELL_ADHESION_MEDIATED_BY_CADHERIN	GO_CELL_CELL_ADHESION_MEDIATED_BY_CADHERIN		15	-0.594747	-1.43027	0.106952	0.462608	1	1347	tags=27%, list=10%, signal=30%	HeterovsU937	neg
															GO_RESPONSE_TO_PLATELET_DERIVED_GROWTH_FACTOR	GO_RESPONSE_TO_PLATELET_DERIVED_GROWTH_FACTOR		14	-0.730117	-1.55079	0.0396601	0.462685	1	968	tags=21%, list=7%, signal=23%	HomovsHetero	neg
															GO_REGULATION_OF_CELLULAR_EXTRAVASATION	GO_REGULATION_OF_CELLULAR_EXTRAVASATION		16	-0.727076	-1.55913	0.0328103	0.462928	1	888	tags=31%, list=7%, signal=33%	HomovsHetero	neg
															GO_REGULATION_OF_MICROVILLUS_ORGANIZATION	GO_REGULATION_OF_MICROVILLUS_ORGANIZATION	Details ...	12	0.689842	1.80213	0.0134228	0.463797	0.998	602	tags=33%, list=4%, signal=35%	HomovsU937	pos
															GO_POSITIVE_REGULATION_OF_CELLULAR_EXTRAVASATION	GO_POSITIVE_REGULATION_OF_CELLULAR_EXTRAVASATION		10	-0.803837	-1.55572	0.0318665	0.464123	1	792	tags=40%, list=6%, signal=42%	HomovsHetero	neg
															GO_DORSAL_VENTRAL_PATTERN_FORMATION	GO_DORSAL_VENTRAL_PATTERN_FORMATION		44	-0.616177	-1.54585	0.021327	0.464692	1	1271	tags=20%, list=9%, signal=22%	HomovsHetero	neg
															GO_POSITIVE_REGULATION_OF_KIDNEY_DEVELOPMENT	GO_POSITIVE_REGULATION_OF_KIDNEY_DEVELOPMENT		19	-0.695375	-1.54881	0.0216216	0.4647	1	286	tags=21%, list=2%, signal=21%	HomovsHetero	neg
															GO_EMBRYONIC_HEMOPOIESIS	GO_EMBRYONIC_HEMOPOIESIS	Details ...	15	0.675017	1.81882	0.00675676	0.465202	0.997	1561	tags=40%, list=11%, signal=45%	HomovsU937	pos
															GO_REGULATION_OF_EXECUTION_PHASE_OF_APOPTOSIS	GO_REGULATION_OF_EXECUTION_PHASE_OF_APOPTOSIS		17	-0.589296	-1.42706	0.0839286	0.465276	1	756	tags=18%, list=6%, signal=19%	HeterovsU937	neg
															GO_MITOTIC_CELL_CYCLE_ARREST	GO_MITOTIC_CELL_CYCLE_ARREST		13	-0.758914	-1.55704	0.029453	0.465601	1	446	tags=23%, list=3%, signal=24%	HomovsHetero	neg
															GO_SUBPALLIUM_DEVELOPMENT	GO_SUBPALLIUM_DEVELOPMENT		15	-0.723577	-1.54482	0.0414365	0.466398	1	1271	tags=33%, list=9%, signal=37%	HomovsHetero	neg
															GO_DETECTION_OF_TEMPERATURE_STIMULUS	GO_DETECTION_OF_TEMPERATURE_STIMULUS		10	-0.656593	-1.42721	0.0943739	0.466428	1	3502	tags=60%, list=26%, signal=81%	HeterovsU937	neg
															GO_CELLULAR_RESPONSE_TO_AMYLOID_BETA	GO_CELLULAR_RESPONSE_TO_AMYLOID_BETA	Details ...	21	-0.72614	-1.83799	0.00166389	0.466496	0.988	928	tags=29%, list=7%, signal=31%	HeterovsU937	neg
															GO_RECEPTOR_CATABOLIC_PROCESS	GO_RECEPTOR_CATABOLIC_PROCESS		30	-0.673056	-1.54604	0.0211443	0.467323	1	224	tags=7%, list=2%, signal=7%	HomovsHetero	neg
															GO_POSITIVE_REGULATION_OF_VASOCONSTRICTION	GO_POSITIVE_REGULATION_OF_VASOCONSTRICTION		13	-0.752217	-1.55747	0.0271041	0.467441	1	1124	tags=31%, list=8%, signal=34%	HomovsHetero	neg
															GO_VENTRICULAR_CARDIAC_MUSCLE_CELL_MEMBRANE_REPOLARIZATION	GO_VENTRICULAR_CARDIAC_MUSCLE_CELL_MEMBRANE_REPOLARIZATION		15	-0.734843	-1.55585	0.0329041	0.467552	1	920	tags=27%, list=7%, signal=29%	HomovsHetero	neg
															GO_REGULATION_OF_DOPAMINE_SECRETION	GO_REGULATION_OF_DOPAMINE_SECRETION		12	-0.776482	-1.54656	0.0218023	0.468208	1	846	tags=42%, list=6%, signal=44%	HomovsHetero	neg
															GO_POSITIVE_REGULATION_OF_CYTOPLASMIC_TRANSPORT	GO_POSITIVE_REGULATION_OF_CYTOPLASMIC_TRANSPORT	Details ...	10	0.72202	1.8125	0.0153846	0.468395	0.998	30	tags=10%, list=0%, signal=10%	HomovsU937	pos
															GO_PLATELET_DEGRANULATION	GO_PLATELET_DEGRANULATION		75	-0.565257	-1.59971	0.00559284	0.468728	1	1921	tags=31%, list=14%, signal=36%	HomovsU937	neg
															GO_REGULATION_OF_PROTEIN_COMPLEX_STABILITY	GO_REGULATION_OF_PROTEIN_COMPLEX_STABILITY	Details ...	10	0.748378	1.7994	0.0116959	0.469134	0.983	531	tags=30%, list=4%, signal=31%	HomovsHetero	pos
															GO_ECTODERM_DEVELOPMENT	GO_ECTODERM_DEVELOPMENT		16	-0.704777	-1.59844	0.0369863	0.469326	1	500	tags=25%, list=4%, signal=26%	HomovsU937	neg
															GO_POSTSYNAPSE_ASSEMBLY	GO_POSTSYNAPSE_ASSEMBLY		15	-0.717038	-1.60033	0.0197183	0.471273	1	835	tags=40%, list=6%, signal=43%	HomovsU937	neg
															GO_POSITIVE_REGULATION_OF_HEART_CONTRACTION	GO_POSITIVE_REGULATION_OF_HEART_CONTRACTION		20	-0.562074	-1.41719	0.0910596	0.471336	1	5	tags=5%, list=0%, signal=5%	HeterovsU937	neg
															GO_EMBRYONIC_AXIS_SPECIFICATION	GO_EMBRYONIC_AXIS_SPECIFICATION		19	-0.698808	-1.54657	0.0458971	0.471916	1	937	tags=26%, list=7%, signal=28%	HomovsHetero	neg
															GO_RESPONSE_TO_MOLECULE_OF_BACTERIAL_ORIGIN	GO_RESPONSE_TO_MOLECULE_OF_BACTERIAL_ORIGIN		200	-0.383857	-1.42293	0.0266041	0.472246	1	1834	tags=24%, list=14%, signal=27%	HeterovsU937	neg
															GO_KERATINOCYTE_PROLIFERATION	GO_KERATINOCYTE_PROLIFERATION		19	-0.687228	-1.54289	0.0337662	0.472405	1	218	tags=16%, list=2%, signal=16%	HomovsHetero	neg
															GO_MAINTENANCE_OF_PROTEIN_LOCATION	GO_MAINTENANCE_OF_PROTEIN_LOCATION		70	-0.450721	-1.4234	0.0429043	0.472466	1	1641	tags=21%, list=12%, signal=24%	HeterovsU937	neg
															GO_POSITIVE_REGULATION_OF_BONE_MINERALIZATION	GO_POSITIVE_REGULATION_OF_BONE_MINERALIZATION		21	-0.553591	-1.41727	0.105802	0.472588	1	1934	tags=33%, list=14%, signal=39%	HeterovsU937	neg
															GO_NEGATIVE_REGULATION_OF_INNATE_IMMUNE_RESPONSE	GO_NEGATIVE_REGULATION_OF_INNATE_IMMUNE_RESPONSE		45	-0.484214	-1.41617	0.0585366	0.472591	1	1486	tags=27%, list=11%, signal=30%	HeterovsU937	neg
															GO_NEGATIVE_REGULATION_OF_RHO_PROTEIN_SIGNAL_TRANSDUCTION	GO_NEGATIVE_REGULATION_OF_RHO_PROTEIN_SIGNAL_TRANSDUCTION	Details ...	16	0.646927	1.83117	0.013468	0.472603	0.996	1105	tags=31%, list=8%, signal=34%	HomovsU937	pos
															GO_PEPTIDYL_L_CYSTEINE_S_PALMITOYLATION	GO_PEPTIDYL_L_CYSTEINE_S_PALMITOYLATION		18	-0.706322	-1.54081	0.0281879	0.472659	1	195	tags=11%, list=1%, signal=11%	HomovsHetero	neg
															GO_POSITIVE_REGULATION_OF_T_CELL_PROLIFERATION	GO_POSITIVE_REGULATION_OF_T_CELL_PROLIFERATION		63	-0.453822	-1.42379	0.0638298	0.472962	1	2806	tags=40%, list=21%, signal=50%	HeterovsU937	neg
															GO_SYNAPSE_ASSEMBLY	GO_SYNAPSE_ASSEMBLY		77	-0.584646	-1.54197	0.00759219	0.473756	1	1468	tags=29%, list=11%, signal=32%	HomovsHetero	neg
															GO_MUSCLE_CELL_MIGRATION	GO_MUSCLE_CELL_MIGRATION		47	-0.4869	-1.4173	0.07	0.473972	1	1211	tags=28%, list=9%, signal=30%	HeterovsU937	neg
															GO_POSITIVE_REGULATION_OF_SYNAPTIC_TRANSMISSION_GLUTAMATERGIC	GO_POSITIVE_REGULATION_OF_SYNAPTIC_TRANSMISSION_GLUTAMATERGIC		15	-0.600754	-1.41776	0.0989011	0.474248	1	2062	tags=33%, list=15%, signal=39%	HeterovsU937	neg
															GO_POSITIVE_REGULATION_OF_DEFENSE_RESPONSE_TO_VIRUS_BY_HOST	GO_POSITIVE_REGULATION_OF_DEFENSE_RESPONSE_TO_VIRUS_BY_HOST		21	-0.546063	-1.40856	0.0942149	0.474485	1	1097	tags=24%, list=8%, signal=26%	HeterovsU937	neg
															GO_CELLULAR_DEFENSE_RESPONSE	GO_CELLULAR_DEFENSE_RESPONSE		23	-0.549959	-1.4182	0.097561	0.474618	1	2711	tags=39%, list=20%, signal=49%	HeterovsU937	neg
															GO_CYTOPLASMIC_SEQUESTERING_OF_PROTEIN	GO_CYTOPLASMIC_SEQUESTERING_OF_PROTEIN		20	-0.554214	-1.40899	0.0792079	0.474652	1	1641	tags=30%, list=12%, signal=34%	HeterovsU937	neg
															GO_STARTLE_RESPONSE	GO_STARTLE_RESPONSE		14	-0.742293	-1.54103	0.0401146	0.47506	1	1020	tags=29%, list=8%, signal=31%	HomovsHetero	neg
															GO_NEGATIVE_REGULATION_OF_PROTEOLYSIS	GO_NEGATIVE_REGULATION_OF_PROTEOLYSIS		187	-0.389609	-1.41843	0.00896861	0.475479	1	1587	tags=20%, list=12%, signal=22%	HeterovsU937	neg
															GO_REGULATION_OF_OSTEOCLAST_DIFFERENTIATION	GO_REGULATION_OF_OSTEOCLAST_DIFFERENTIATION		39	-0.491398	-1.40969	0.077187	0.475545	1	3792	tags=49%, list=28%, signal=67%	HeterovsU937	neg
															GO_ESTABLISHMENT_OF_MITOTIC_SPINDLE_LOCALIZATION	GO_ESTABLISHMENT_OF_MITOTIC_SPINDLE_LOCALIZATION	Details ...	28	0.572369	1.80469	0.0135747	0.475549	0.998	2468	tags=36%, list=18%, signal=44%	HomovsU937	pos
															GO_PHOSPHOLIPID_DEPHOSPHORYLATION	GO_PHOSPHOLIPID_DEPHOSPHORYLATION		31	-0.516302	-1.40913	0.0876623	0.475716	1	2211	tags=35%, list=16%, signal=42%	HeterovsU937	neg
															GO_REGULATION_OF_RYANODINE_SENSITIVE_CALCIUM_RELEASE_CHANNEL_ACTIVITY	GO_REGULATION_OF_RYANODINE_SENSITIVE_CALCIUM_RELEASE_CHANNEL_ACTIVITY		13	-0.611647	-1.42047	0.0970537	0.475747	1	3388	tags=54%, list=25%, signal=72%	HeterovsU937	neg
															GO_CALCIUM_ION_REGULATED_EXOCYTOSIS_OF_NEUROTRANSMITTER	GO_CALCIUM_ION_REGULATED_EXOCYTOSIS_OF_NEUROTRANSMITTER		12	-0.760235	-1.53875	0.0340741	0.475766	1	1376	tags=42%, list=10%, signal=46%	HomovsHetero	neg
															GO_DETECTION_OF_STIMULUS_INVOLVED_IN_SENSORY_PERCEPTION	GO_DETECTION_OF_STIMULUS_INVOLVED_IN_SENSORY_PERCEPTION		35	-0.503786	-1.42099	0.0721831	0.475791	1	2172	tags=34%, list=16%, signal=41%	HeterovsU937	neg
															GO_REGULATION_OF_WOUND_HEALING	GO_REGULATION_OF_WOUND_HEALING		79	-0.43899	-1.40693	0.0470016	0.476093	1	2030	tags=33%, list=15%, signal=38%	HeterovsU937	neg
															GO_REGULATION_OF_ACTIN_FILAMENT_BASED_MOVEMENT	GO_REGULATION_OF_ACTIN_FILAMENT_BASED_MOVEMENT		23	-0.53783	-1.4063	0.0930626	0.476483	1	1384	tags=39%, list=10%, signal=43%	HeterovsU937	neg
															GO_LOW_DENSITY_LIPOPROTEIN_PARTICLE_CLEARANCE	GO_LOW_DENSITY_LIPOPROTEIN_PARTICLE_CLEARANCE		25	-0.531789	-1.4186	0.0724876	0.476505	1	2119	tags=20%, list=16%, signal=24%	HeterovsU937	neg
															GO_T_CELL_MIGRATION	GO_T_CELL_MIGRATION		35	-0.497728	-1.40986	0.0625	0.476511	1	1468	tags=23%, list=11%, signal=26%	HeterovsU937	neg
															GO_NEPHRON_DEVELOPMENT	GO_NEPHRON_DEVELOPMENT		69	-0.582416	-1.53928	0.0122494	0.476545	1	1906	tags=25%, list=14%, signal=29%	HomovsHetero	neg
															GO_REGULATION_OF_RESPONSE_TO_WOUNDING	GO_REGULATION_OF_RESPONSE_TO_WOUNDING		99	-0.418589	-1.41018	0.0482115	0.477097	1	2030	tags=30%, list=15%, signal=35%	HeterovsU937	neg
															GO_RENAL_FILTRATION	GO_RENAL_FILTRATION		11	-0.635983	-1.40702	0.108014	0.477309	1	1753	tags=27%, list=13%, signal=31%	HeterovsU937	neg
															GO_POSITIVE_REGULATION_OF_REACTIVE_OXYGEN_SPECIES_BIOSYNTHETIC_PROCESS	GO_POSITIVE_REGULATION_OF_REACTIVE_OXYGEN_SPECIES_BIOSYNTHETIC_PROCESS		34	-0.501854	-1.41108	0.071066	0.477659	1	2022	tags=32%, list=15%, signal=38%	HeterovsU937	neg
															GO_RESPONSE_TO_DIETARY_EXCESS	GO_RESPONSE_TO_DIETARY_EXCESS		12	-0.63223	-1.41871	0.0930626	0.477741	1	3191	tags=58%, list=23%, signal=76%	HeterovsU937	neg
															GO_REGULATION_OF_CATION_TRANSMEMBRANE_TRANSPORT	GO_REGULATION_OF_CATION_TRANSMEMBRANE_TRANSPORT		186	-0.387619	-1.41317	0.0288316	0.477904	1	1431	tags=22%, list=11%, signal=24%	HeterovsU937	neg
															GO_CELLULAR_RESPONSE_TO_OXYGEN_RADICAL	GO_CELLULAR_RESPONSE_TO_OXYGEN_RADICAL		17	-0.585182	-1.4136	0.0982456	0.478182	1	404	tags=18%, list=3%, signal=18%	HeterovsU937	neg
															GO_NEGATIVE_REGULATION_OF_T_CELL_PROLIFERATION	GO_NEGATIVE_REGULATION_OF_T_CELL_PROLIFERATION		37	-0.493893	-1.4021	0.0910747	0.478362	1	1917	tags=32%, list=14%, signal=38%	HeterovsU937	neg
															GO_POSITIVE_REGULATION_OF_CALCIUM_ION_TRANSPORT	GO_POSITIVE_REGULATION_OF_CALCIUM_ION_TRANSPORT		54	-0.469743	-1.41025	0.0662252	0.478403	1	2064	tags=26%, list=15%, signal=30%	HeterovsU937	neg
															GO_DENDRITIC_SPINE_MORPHOGENESIS	GO_DENDRITIC_SPINE_MORPHOGENESIS		44	-0.480998	-1.41132	0.0615641	0.478487	1	2603	tags=34%, list=19%, signal=42%	HeterovsU937	neg
															GO_CELLULAR_COMPONENT_MAINTENANCE	GO_CELLULAR_COMPONENT_MAINTENANCE		44	-0.476704	-1.40455	0.077686	0.478518	1	2313	tags=36%, list=17%, signal=44%	HeterovsU937	neg
															GO_POSITIVE_REGULATION_OF_BONE_RESORPTION	GO_POSITIVE_REGULATION_OF_BONE_RESORPTION		10	-0.636686	-1.39996	0.129252	0.478623	1	1106	tags=30%, list=8%, signal=33%	HeterovsU937	neg
															GO_RESPONSE_TO_MINERALOCORTICOID	GO_RESPONSE_TO_MINERALOCORTICOID		15	-0.602047	-1.41229	0.101806	0.478794	1	2098	tags=40%, list=15%, signal=47%	HeterovsU937	neg
															GO_APOPTOTIC_CELL_CLEARANCE	GO_APOPTOTIC_CELL_CLEARANCE		32	-0.497108	-1.40243	0.0893761	0.478834	1	1191	tags=19%, list=9%, signal=21%	HeterovsU937	neg
															GO_OSTEOCLAST_DIFFERENTIATION	GO_OSTEOCLAST_DIFFERENTIATION		61	-0.448609	-1.41884	0.0495727	0.478901	1	2636	tags=38%, list=19%, signal=47%	HeterovsU937	neg
															GO_REGULATION_OF_NON_CANONICAL_WNT_SIGNALING_PATHWAY	GO_REGULATION_OF_NON_CANONICAL_WNT_SIGNALING_PATHWAY		11	-0.622564	-1.40477	0.106489	0.479329	1	370	tags=18%, list=3%, signal=19%	HeterovsU937	neg
															GO_EPITHELIAL_CELL_DEVELOPMENT	GO_EPITHELIAL_CELL_DEVELOPMENT		133	-0.537212	-1.59421	0.00210526	0.4795	1	1779	tags=23%, list=13%, signal=27%	HomovsU937	neg
															GO_POSITIVE_REGULATION_OF_MACROPHAGE_DIFFERENTIATION	GO_POSITIVE_REGULATION_OF_MACROPHAGE_DIFFERENTIATION		10	-0.635021	-1.41138	0.102215	0.479778	1	2742	tags=50%, list=20%, signal=63%	HeterovsU937	neg
															GO_CYTOKINE_METABOLIC_PROCESS	GO_CYTOKINE_METABOLIC_PROCESS		35	-0.493239	-1.40005	0.0758621	0.479781	1	1663	tags=31%, list=12%, signal=36%	HeterovsU937	neg
															GO_CARDIAC_VENTRICLE_DEVELOPMENT	GO_CARDIAC_VENTRICLE_DEVELOPMENT		65	-0.449075	-1.40306	0.0439189	0.479824	1	436	tags=11%, list=3%, signal=11%	HeterovsU937	neg
															GO_CARDIAC_VENTRICLE_MORPHOGENESIS	GO_CARDIAC_VENTRICLE_MORPHOGENESIS		35	-0.494894	-1.40257	0.0803279	0.479838	1	362	tags=11%, list=3%, signal=12%	HeterovsU937	neg
															GO_ARF_PROTEIN_SIGNAL_TRANSDUCTION	GO_ARF_PROTEIN_SIGNAL_TRANSDUCTION	Details ...	17	0.625441	1.74065	0.0242215	0.480032	0.998	636	tags=24%, list=5%, signal=25%	HomovsHetero	pos
															GO_VASCULAR_ENDOTHELIAL_GROWTH_FACTOR_RECEPTOR_SIGNALING_PATHWAY	GO_VASCULAR_ENDOTHELIAL_GROWTH_FACTOR_RECEPTOR_SIGNALING_PATHWAY		64	-0.444683	-1.40081	0.0604027	0.480517	1	2002	tags=25%, list=15%, signal=29%	HeterovsU937	neg
															GO_REGULATION_OF_LEUKOCYTE_PROLIFERATION	GO_REGULATION_OF_LEUKOCYTE_PROLIFERATION		142	-0.393949	-1.40329	0.0242326	0.480553	1	1940	tags=27%, list=14%, signal=32%	HeterovsU937	neg
															GO_NEGATIVE_REGULATION_OF_CELL_ACTIVATION	GO_NEGATIVE_REGULATION_OF_CELL_ACTIVATION		123	-0.406833	-1.40008	0.0192926	0.481106	1	2311	tags=29%, list=17%, signal=35%	HeterovsU937	neg
															GO_N_ACETYLGLUCOSAMINE_METABOLIC_PROCESS	GO_N_ACETYLGLUCOSAMINE_METABOLIC_PROCESS		11	-0.640088	-1.39843	0.115453	0.48138	1	2847	tags=64%, list=21%, signal=80%	HeterovsU937	neg
															GO_POSITIVE_REGULATION_OF_REACTIVE_OXYGEN_SPECIES_METABOLIC_PROCESS	GO_POSITIVE_REGULATION_OF_REACTIVE_OXYGEN_SPECIES_METABOLIC_PROCESS		62	-0.446441	-1.39578	0.0551839	0.482864	1	2022	tags=23%, list=15%, signal=26%	HeterovsU937	neg
															GO_NEGATIVE_REGULATION_OF_PEPTIDASE_ACTIVITY	GO_NEGATIVE_REGULATION_OF_PEPTIDASE_ACTIVITY		122	-0.538281	-1.59474	0.00105042	0.482961	1	1921	tags=30%, list=14%, signal=34%	HomovsU937	neg
															GO_REGULATION_OF_BONE_MINERALIZATION	GO_REGULATION_OF_BONE_MINERALIZATION		39	-0.489588	-1.39725	0.0648464	0.48319	1	3254	tags=41%, list=24%, signal=54%	HeterovsU937	neg
															GO_POSITIVE_REGULATION_OF_MACROPHAGE_MIGRATION	GO_POSITIVE_REGULATION_OF_MACROPHAGE_MIGRATION		11	-0.622753	-1.39608	0.114187	0.483472	1	1878	tags=45%, list=14%, signal=53%	HeterovsU937	neg
															GO_CYTOPLASMIC_PATTERN_RECOGNITION_RECEPTOR_SIGNALING_PATHWAY	GO_CYTOPLASMIC_PATTERN_RECOGNITION_RECEPTOR_SIGNALING_PATHWAY		59	-0.443724	-1.39499	0.0609952	0.483791	1	2028	tags=24%, list=15%, signal=28%	HeterovsU937	neg
															GO_REGULATION_OF_MACROPHAGE_DIFFERENTIATION	GO_REGULATION_OF_MACROPHAGE_DIFFERENTIATION		13	-0.600581	-1.39639	0.112875	0.484056	1	2742	tags=46%, list=20%, signal=58%	HeterovsU937	neg
															GO_CORNIFICATION	GO_CORNIFICATION		16	-0.707352	-1.53002	0.0412088	0.484161	1	1530	tags=50%, list=11%, signal=56%	HomovsHetero	neg
															GO_CELL_FATE_COMMITMENT	GO_CELL_FATE_COMMITMENT		125	-0.551496	-1.53048	0.003125	0.485482	1	943	tags=16%, list=7%, signal=17%	HomovsHetero	neg
															GO_SYNAPTIC_TRANSMISSION_DOPAMINERGIC	GO_SYNAPTIC_TRANSMISSION_DOPAMINERGIC	Details ...	13	0.811068	1.90383	0.00445434	0.485548	0.955	513	tags=31%, list=4%, signal=32%	HeterovsU937	pos
															GO_NEUROTRANSMITTER_METABOLIC_PROCESS	GO_NEUROTRANSMITTER_METABOLIC_PROCESS		14	-0.728142	-1.52875	0.0408451	0.48683	1	678	tags=21%, list=5%, signal=23%	HomovsHetero	neg
															GO_REGULATION_OF_RECEPTOR_RECYCLING	GO_REGULATION_OF_RECEPTOR_RECYCLING		15	-0.722117	-1.53074	0.0497866	0.487588	1	5	tags=7%, list=0%, signal=7%	HomovsHetero	neg
															GO_POSITIVE_REGULATION_OF_P38MAPK_CASCADE	GO_POSITIVE_REGULATION_OF_P38MAPK_CASCADE	Details ...	19	0.628629	1.85152	0.011583	0.488346	0.991	1578	tags=42%, list=12%, signal=48%	HomovsU937	pos
															GO_SIALYLATION	GO_SIALYLATION		11	-0.622191	-1.38841	0.130435	0.488358	1	1906	tags=45%, list=14%, signal=53%	HeterovsU937	neg
															GO_REGULATION_OF_BIOMINERALIZATION	GO_REGULATION_OF_BIOMINERALIZATION		48	-0.471901	-1.38878	0.0715474	0.488699	1	3254	tags=40%, list=24%, signal=52%	HeterovsU937	neg
															GO_COLLAGEN_CATABOLIC_PROCESS	GO_COLLAGEN_CATABOLIC_PROCESS		22	-0.541667	-1.38906	0.105546	0.48932	1	110	tags=14%, list=1%, signal=14%	HeterovsU937	neg
															GO_CAMERA_TYPE_EYE_DEVELOPMENT	GO_CAMERA_TYPE_EYE_DEVELOPMENT		187	-0.545508	-1.52749	0.00101833	0.489732	1	1553	tags=21%, list=11%, signal=24%	HomovsHetero	neg
															GO_POSITIVE_CHEMOTAXIS	GO_POSITIVE_CHEMOTAXIS		26	-0.524268	-1.3893	0.0996441	0.490077	1	1737	tags=35%, list=13%, signal=40%	HeterovsU937	neg
															GO_REGULATION_OF_CELL_CELL_ADHESION_MEDIATED_BY_CADHERIN	GO_REGULATION_OF_CELL_CELL_ADHESION_MEDIATED_BY_CADHERIN		11	-0.624408	-1.38692	0.127768	0.490109	1	558	tags=18%, list=4%, signal=19%	HeterovsU937	neg
															GO_REGULATION_OF_CARDIAC_MUSCLE_CELL_MEMBRANE_REPOLARIZATION	GO_REGULATION_OF_CARDIAC_MUSCLE_CELL_MEMBRANE_REPOLARIZATION		15	-0.725282	-1.53092	0.0399449	0.49011	1	920	tags=27%, list=7%, signal=29%	HomovsHetero	neg
															GO_REGULATION_OF_CHEMOTAXIS	GO_REGULATION_OF_CHEMOTAXIS		116	-0.408076	-1.39054	0.0382695	0.490758	1	2010	tags=28%, list=15%, signal=33%	HeterovsU937	neg
															GO_SKELETAL_MUSCLE_ACETYLCHOLINE_GATED_CHANNEL_CLUSTERING	GO_SKELETAL_MUSCLE_ACETYLCHOLINE_GATED_CHANNEL_CLUSTERING		10	-0.637622	-1.38707	0.0961888	0.491005	1	2416	tags=40%, list=18%, signal=49%	HeterovsU937	neg
															GO_NEGATIVE_REGULATION_OF_TRANSCRIPTION_REGULATORY_REGION_DNA_BINDING	GO_NEGATIVE_REGULATION_OF_TRANSCRIPTION_REGULATORY_REGION_DNA_BINDING		12	-0.623478	-1.39189	0.122523	0.491057	1	1704	tags=42%, list=13%, signal=48%	HeterovsU937	neg
															GO_SMOOTH_MUSCLE_CELL_MIGRATION	GO_SMOOTH_MUSCLE_CELL_MIGRATION		39	-0.482987	-1.38608	0.0963082	0.491208	1	1211	tags=28%, list=9%, signal=31%	HeterovsU937	neg
															GO_OVULATION_CYCLE_PROCESS	GO_OVULATION_CYCLE_PROCESS		18	-0.5556	-1.38224	0.107664	0.49123	1	1227	tags=28%, list=9%, signal=30%	HeterovsU937	neg
															GO_CAMP_METABOLIC_PROCESS	GO_CAMP_METABOLIC_PROCESS		11	-0.631221	-1.39131	0.116041	0.491296	1	2427	tags=55%, list=18%, signal=66%	HeterovsU937	neg
															GO_PURINE_NUCLEOTIDE_TRANSPORT	GO_PURINE_NUCLEOTIDE_TRANSPORT		21	-0.541713	-1.39082	0.0867347	0.491325	1	1760	tags=33%, list=13%, signal=38%	HeterovsU937	neg
															GO_POSITIVE_REGULATION_OF_CD4_POSITIVE_ALPHA_BETA_T_CELL_ACTIVATION	GO_POSITIVE_REGULATION_OF_CD4_POSITIVE_ALPHA_BETA_T_CELL_ACTIVATION		25	-0.528381	-1.38932	0.101933	0.491415	1	2604	tags=40%, list=19%, signal=49%	HeterovsU937	neg
															GO_CELL_COMMUNICATION_INVOLVED_IN_CARDIAC_CONDUCTION	GO_CELL_COMMUNICATION_INVOLVED_IN_CARDIAC_CONDUCTION		23	-0.530831	-1.38262	0.102349	0.491492	1	1384	tags=30%, list=10%, signal=34%	HeterovsU937	neg
															GO_NEGATIVE_REGULATION_OF_PROTEIN_IMPORT	GO_NEGATIVE_REGULATION_OF_PROTEIN_IMPORT		10	-0.642226	-1.38303	0.128623	0.491677	1	19	tags=10%, list=0%, signal=10%	HeterovsU937	neg
															GO_MYELOID_LEUKOCYTE_CYTOKINE_PRODUCTION	GO_MYELOID_LEUKOCYTE_CYTOKINE_PRODUCTION		24	-0.535303	-1.3897	0.0904437	0.491783	1	3259	tags=38%, list=24%, signal=49%	HeterovsU937	neg
															GO_DETECTION_OF_MECHANICAL_STIMULUS_INVOLVED_IN_SENSORY_PERCEPTION	GO_DETECTION_OF_MECHANICAL_STIMULUS_INVOLVED_IN_SENSORY_PERCEPTION		14	-0.710362	-1.56023	0.0307467	0.492366	1	1670	tags=50%, list=12%, signal=57%	HomovsU937	neg
															GO_REGULATION_OF_NECROTIC_CELL_DEATH	GO_REGULATION_OF_NECROTIC_CELL_DEATH		19	-0.55592	-1.38321	0.113145	0.492464	1	966	tags=16%, list=7%, signal=17%	HeterovsU937	neg
															GO_SUBSTRATE_DEPENDENT_CELL_MIGRATION	GO_SUBSTRATE_DEPENDENT_CELL_MIGRATION		20	-0.68299	-1.52629	0.0283286	0.492531	1	826	tags=30%, list=6%, signal=32%	HomovsHetero	neg
															GO_RESPONSE_TO_CAFFEINE	GO_RESPONSE_TO_CAFFEINE		12	-0.727185	-1.56291	0.0477612	0.492793	1	230	tags=17%, list=2%, signal=17%	HomovsU937	neg
															GO_APPENDAGE_DEVELOPMENT	GO_APPENDAGE_DEVELOPMENT		92	-0.566283	-1.52563	0.00859291	0.492807	1	524	tags=11%, list=4%, signal=11%	HomovsHetero	neg
															GO_POSITIVE_REGULATION_OF_NUCLEOTIDE_BIOSYNTHETIC_PROCESS	GO_POSITIVE_REGULATION_OF_NUCLEOTIDE_BIOSYNTHETIC_PROCESS		13	-0.596986	-1.38503	0.119792	0.492827	1	1505	tags=38%, list=11%, signal=43%	HeterovsU937	neg
															GO_LYMPH_VESSEL_MORPHOGENESIS	GO_LYMPH_VESSEL_MORPHOGENESIS		11	-0.724037	-1.56101	0.0294985	0.492966	1	1345	tags=27%, list=10%, signal=30%	HomovsU937	neg
															GO_WOUND_HEALING_SPREADING_OF_EPIDERMAL_CELLS	GO_WOUND_HEALING_SPREADING_OF_EPIDERMAL_CELLS		10	-0.631442	-1.38112	0.111732	0.492969	1	2013	tags=40%, list=15%, signal=47%	HeterovsU937	neg
															GO_COCHLEA_MORPHOGENESIS	GO_COCHLEA_MORPHOGENESIS		11	-0.760299	-1.53102	0.0502283	0.493106	1	250	tags=36%, list=2%, signal=37%	HomovsHetero	neg
															GO_POSITIVE_REGULATION_OF_BIOMINERALIZATION	GO_POSITIVE_REGULATION_OF_BIOMINERALIZATION		25	-0.530762	-1.3835	0.107206	0.493113	1	3254	tags=48%, list=24%, signal=63%	HeterovsU937	neg
															GO_ANTIMICROBIAL_HUMORAL_RESPONSE	GO_ANTIMICROBIAL_HUMORAL_RESPONSE		31	-0.624558	-1.56189	0.0200501	0.493332	1	1495	tags=39%, list=11%, signal=43%	HomovsU937	neg
															GO_FAT_SOLUBLE_VITAMIN_BIOSYNTHETIC_PROCESS	GO_FAT_SOLUBLE_VITAMIN_BIOSYNTHETIC_PROCESS		11	-0.61292	-1.38377	0.122378	0.493693	1	1371	tags=27%, list=10%, signal=30%	HeterovsU937	neg
															GO_REGULATION_OF_SYSTEMIC_ARTERIAL_BLOOD_PRESSURE_BY_HORMONE	GO_REGULATION_OF_SYSTEMIC_ARTERIAL_BLOOD_PRESSURE_BY_HORMONE		14	-0.581301	-1.38421	0.136525	0.493714	1	1770	tags=36%, list=13%, signal=41%	HeterovsU937	neg
															GO_NEURON_FATE_COMMITMENT	GO_NEURON_FATE_COMMITMENT		23	-0.670698	-1.57637	0.0206452	0.493774	1	604	tags=26%, list=4%, signal=27%	HomovsU937	neg
															GO_HOMOPHILIC_CELL_ADHESION_VIA_PLASMA_MEMBRANE_ADHESION_MOLECULES	GO_HOMOPHILIC_CELL_ADHESION_VIA_PLASMA_MEMBRANE_ADHESION_MOLECULES		38	-0.600665	-1.5564	0.0182704	0.49405	1	1149	tags=26%, list=8%, signal=29%	HomovsU937	neg
															GO_EMBRYONIC_PLACENTA_MORPHOGENESIS	GO_EMBRYONIC_PLACENTA_MORPHOGENESIS		13	-0.755314	-1.53223	0.0282738	0.494117	1	982	tags=31%, list=7%, signal=33%	HomovsHetero	neg
															GO_DOPAMINERGIC_NEURON_DIFFERENTIATION	GO_DOPAMINERGIC_NEURON_DIFFERENTIATION		16	-0.714992	-1.53358	0.0258856	0.494265	1	1565	tags=31%, list=12%, signal=35%	HomovsHetero	neg
															GO_REGULATION_OF_DENDRITE_EXTENSION	GO_REGULATION_OF_DENDRITE_EXTENSION		16	-0.698331	-1.53418	0.0522496	0.49495	1	2303	tags=44%, list=17%, signal=53%	HomovsHetero	neg
															GO_MALE_GENITALIA_DEVELOPMENT	GO_MALE_GENITALIA_DEVELOPMENT		11	-0.770771	-1.52444	0.0274964	0.49527	1	136	tags=18%, list=1%, signal=18%	HomovsHetero	neg
															GO_RESPONSE_TO_IMMOBILIZATION_STRESS	GO_RESPONSE_TO_IMMOBILIZATION_STRESS		15	-0.716829	-1.5327	0.0373961	0.495302	1	147	tags=13%, list=1%, signal=13%	HomovsHetero	neg
															GO_DETECTION_OF_STIMULUS_INVOLVED_IN_SENSORY_PERCEPTION_OF_PAIN	GO_DETECTION_OF_STIMULUS_INVOLVED_IN_SENSORY_PERCEPTION_OF_PAIN		14	-0.728162	-1.56314	0.0295858	0.496255	1	1450	tags=43%, list=11%, signal=48%	HomovsU937	neg
															GO_COLLATERAL_SPROUTING	GO_COLLATERAL_SPROUTING		13	-0.739097	-1.53103	0.0448625	0.496588	1	1254	tags=38%, list=9%, signal=42%	HomovsHetero	neg
															GO_POSITIVE_REGULATION_OF_ACUTE_INFLAMMATORY_RESPONSE	GO_POSITIVE_REGULATION_OF_ACUTE_INFLAMMATORY_RESPONSE	Details ...	17	0.613126	1.74263	0.0103448	0.496974	0.998	999	tags=29%, list=7%, signal=32%	HomovsHetero	pos
															GO_RESPONSE_TO_INTERLEUKIN_12	GO_RESPONSE_TO_INTERLEUKIN_12		39	-0.479134	-1.37431	0.0960549	0.497412	1	2684	tags=31%, list=20%, signal=38%	HeterovsU937	neg
															GO_GLANDULAR_EPITHELIAL_CELL_DIFFERENTIATION	GO_GLANDULAR_EPITHELIAL_CELL_DIFFERENTIATION		27	-0.64684	-1.52196	0.0303797	0.497817	1	312	tags=11%, list=2%, signal=11%	HomovsHetero	neg
															GO_POSITIVE_REGULATION_OF_MYELINATION	GO_POSITIVE_REGULATION_OF_MYELINATION		12	-0.720039	-1.55649	0.0386399	0.498009	1	1561	tags=33%, list=11%, signal=38%	HomovsU937	neg
															GO_POSITIVE_REGULATION_OF_MONONUCLEAR_CELL_MIGRATION	GO_POSITIVE_REGULATION_OF_MONONUCLEAR_CELL_MIGRATION		10	-0.636391	-1.37834	0.106061	0.498118	1	1575	tags=40%, list=12%, signal=45%	HeterovsU937	neg
															GO_DETECTION_OF_STIMULUS	GO_DETECTION_OF_STIMULUS		130	-0.397008	-1.37451	0.0307692	0.498152	1	2190	tags=24%, list=16%, signal=28%	HeterovsU937	neg
															GO_REGULATION_OF_MONONUCLEAR_CELL_MIGRATION	GO_REGULATION_OF_MONONUCLEAR_CELL_MIGRATION		22	-0.532712	-1.3787	0.107018	0.498462	1	1785	tags=41%, list=13%, signal=47%	HeterovsU937	neg
															GO_NUCLEOTIDE_TRANSPORT	GO_NUCLEOTIDE_TRANSPORT		24	-0.518374	-1.37486	0.116487	0.498498	1	1760	tags=33%, list=13%, signal=38%	HeterovsU937	neg
															GO_SYNAPTIC_VESICLE_MATURATION	GO_SYNAPTIC_VESICLE_MATURATION		11	-0.611824	-1.37773	0.113274	0.498513	1	401	tags=27%, list=3%, signal=28%	HeterovsU937	neg
															GO_ZYMOGEN_ACTIVATION	GO_ZYMOGEN_ACTIVATION		26	-0.659059	-1.51919	0.0427461	0.498557	1	777	tags=19%, list=6%, signal=20%	HomovsHetero	neg
															GO_RESPONSE_TO_CAMP	GO_RESPONSE_TO_CAMP		51	-0.450987	-1.37533	0.0749574	0.49856	1	2493	tags=31%, list=18%, signal=38%	HeterovsU937	neg
															GO_SENSORY_ORGAN_MORPHOGENESIS	GO_SENSORY_ORGAN_MORPHOGENESIS		135	-0.547664	-1.52305	0.00623701	0.498773	1	1553	tags=22%, list=11%, signal=25%	HomovsHetero	neg
															GO_BIOMINERALIZATION	GO_BIOMINERALIZATION		80	-0.546576	-1.55284	0.00979325	0.498982	1	971	tags=16%, list=7%, signal=17%	HomovsU937	neg
															GO_AMINE_CATABOLIC_PROCESS	GO_AMINE_CATABOLIC_PROCESS		10	-0.768393	-1.57637	0.0337423	0.499132	1	860	tags=30%, list=6%, signal=32%	HomovsU937	neg
															GO_MITOTIC_CHROMOSOME_CONDENSATION	GO_MITOTIC_CHROMOSOME_CONDENSATION	Details ...	13	0.683109	1.83249	0.0197368	0.499253	0.996	2559	tags=62%, list=19%, signal=76%	HomovsU937	pos
															GO_REGULATION_OF_B_CELL_MEDIATED_IMMUNITY	GO_REGULATION_OF_B_CELL_MEDIATED_IMMUNITY		40	-0.482497	-1.37315	0.0976431	0.49935	1	1310	tags=25%, list=10%, signal=28%	HeterovsU937	neg
															GO_REGULATION_OF_MODIFICATION_OF_SYNAPTIC_STRUCTURE	GO_REGULATION_OF_MODIFICATION_OF_SYNAPTIC_STRUCTURE		10	-0.627061	-1.3769	0.116402	0.499506	1	328	tags=20%, list=2%, signal=20%	HeterovsU937	neg
															GO_CHOLESTEROL_STORAGE	GO_CHOLESTEROL_STORAGE		15	-0.576881	-1.37543	0.117544	0.499548	1	959	tags=20%, list=7%, signal=21%	HeterovsU937	neg
															GO_PYRIMIDINE_RIBONUCLEOSIDE_MONOPHOSPHATE_METABOLIC_PROCESS	GO_PYRIMIDINE_RIBONUCLEOSIDE_MONOPHOSPHATE_METABOLIC_PROCESS		10	-0.629988	-1.37208	0.117949	0.499705	1	359	tags=20%, list=3%, signal=21%	HeterovsU937	neg
															GO_POSITIVE_REGULATION_OF_MESENCHYMAL_CELL_PROLIFERATION	GO_POSITIVE_REGULATION_OF_MESENCHYMAL_CELL_PROLIFERATION	Details ...	16	0.787752	1.89962	0	0.398219	0.963	302	tags=19%, list=2%, signal=19%	HeterovsU937	pos
															GO_ACTIVATION_OF_CYSTEINE_TYPE_ENDOPEPTIDASE_ACTIVITY	GO_ACTIVATION_OF_CYSTEINE_TYPE_ENDOPEPTIDASE_ACTIVITY		10	-0.768557	-1.52219	0.0432099	0.499843	1	231	tags=20%, list=2%, signal=20%	HomovsHetero	neg
															GO_NEGATIVE_REGULATION_OF_LEUKOCYTE_CELL_CELL_ADHESION	GO_NEGATIVE_REGULATION_OF_LEUKOCYTE_CELL_CELL_ADHESION		74	-0.429269	-1.37631	0.0676328	0.499853	1	1917	tags=24%, list=14%, signal=28%	HeterovsU937	neg
															GO_HYPOTHALAMUS_DEVELOPMENT	GO_HYPOTHALAMUS_DEVELOPMENT		10	-0.638678	-1.37581	0.12825	0.499883	1	3247	tags=60%, list=24%, signal=79%	HeterovsU937	neg
															GO_CORNIFICATION	GO_CORNIFICATION		16	-0.690179	-1.56334	0.0358621	0.49991	1	1380	tags=38%, list=10%, signal=42%	HomovsU937	neg
															GO_REGULATION_OF_PHOSPHOLIPID_BIOSYNTHETIC_PROCESS	GO_REGULATION_OF_PHOSPHOLIPID_BIOSYNTHETIC_PROCESS		12	-0.595259	-1.3722	0.127273	0.500695	1	2107	tags=42%, list=16%, signal=49%	HeterovsU937	neg
															GO_FIBRINOLYSIS	GO_FIBRINOLYSIS		10	-0.769184	-1.5194	0.0614934	0.500808	1	2411	tags=60%, list=18%, signal=73%	HomovsHetero	neg
															GO_TISSUE_REMODELING	GO_TISSUE_REMODELING		89	-0.535514	-1.55755	0.00438597	0.501544	1	1735	tags=25%, list=13%, signal=28%	HomovsU937	neg
															GO_NEGATIVE_REGULATION_OF_CELL_MIGRATION_INVOLVED_IN_SPROUTING_ANGIOGENESIS	GO_NEGATIVE_REGULATION_OF_CELL_MIGRATION_INVOLVED_IN_SPROUTING_ANGIOGENESIS		10	-0.768331	-1.57794	0.0368098	0.501606	1	112	tags=20%, list=1%, signal=20%	HomovsU937	neg
															GO_ENDOCARDIAL_CUSHION_MORPHOGENESIS	GO_ENDOCARDIAL_CUSHION_MORPHOGENESIS		18	-0.679091	-1.55666	0.0351124	0.501679	1	624	tags=28%, list=5%, signal=29%	HomovsU937	neg
															GO_NEUROPEPTIDE_SIGNALING_PATHWAY	GO_NEUROPEPTIDE_SIGNALING_PATHWAY		23	-0.66484	-1.57682	0.0265957	0.501783	1	1450	tags=30%, list=11%, signal=34%	HomovsU937	neg
															GO_REGULATION_OF_CALCIUM_ION_IMPORT	GO_REGULATION_OF_CALCIUM_ION_IMPORT		19	-0.667831	-1.56977	0.0319444	0.502092	1	958	tags=26%, list=7%, signal=28%	HomovsU937	neg
															GO_POSITIVE_REGULATION_OF_EXTRACELLULAR_MATRIX_ORGANIZATION	GO_POSITIVE_REGULATION_OF_EXTRACELLULAR_MATRIX_ORGANIZATION		16	-0.731151	-1.52048	0.0290456	0.502113	1	1215	tags=38%, list=9%, signal=41%	HomovsHetero	neg
															GO_EYE_MORPHOGENESIS	GO_EYE_MORPHOGENESIS		82	-0.570405	-1.51975	0.00760043	0.502266	1	1553	tags=23%, list=11%, signal=26%	HomovsHetero	neg
															GO_PHOSPHOLIPASE_C_ACTIVATING_G_PROTEIN_COUPLED_RECEPTOR_SIGNALING_PATHWAY	GO_PHOSPHOLIPASE_C_ACTIVATING_G_PROTEIN_COUPLED_RECEPTOR_SIGNALING_PATHWAY		35	-0.486869	-1.37066	0.123746	0.502382	1	2762	tags=60%, list=20%, signal=75%	HeterovsU937	neg
															GO_CELLULAR_RESPONSE_TO_RETINOIC_ACID	GO_CELLULAR_RESPONSE_TO_RETINOIC_ACID		36	-0.606911	-1.553	0.0195838	0.502586	1	1107	tags=25%, list=8%, signal=27%	HomovsU937	neg
															GO_REVERSE_CHOLESTEROL_TRANSPORT	GO_REVERSE_CHOLESTEROL_TRANSPORT		10	-0.777695	-1.57887	0.0263975	0.502606	1	1691	tags=50%, list=12%, signal=57%	HomovsU937	neg
															GO_POSITIVE_REGULATION_OF_LEUKOCYTE_CHEMOTAXIS	GO_POSITIVE_REGULATION_OF_LEUKOCYTE_CHEMOTAXIS		47	-0.584732	-1.5511	0.0191617	0.503322	1	1471	tags=30%, list=11%, signal=33%	HomovsU937	neg
															GO_REGULATION_OF_B_CELL_APOPTOTIC_PROCESS	GO_REGULATION_OF_B_CELL_APOPTOTIC_PROCESS	Details ...	15	0.660261	1.80091	0.00344828	0.503806	0.982	1387	tags=53%, list=10%, signal=59%	HomovsHetero	pos
															GO_CELL_CELL_JUNCTION_MAINTENANCE	GO_CELL_CELL_JUNCTION_MAINTENANCE		11	-0.767095	-1.55362	0.0333839	0.503872	1	805	tags=55%, list=6%, signal=58%	HomovsU937	neg
															GO_RESPONSE_TO_REDOX_STATE	GO_RESPONSE_TO_REDOX_STATE		11	-0.749565	-1.57042	0.0310078	0.503982	1	1881	tags=27%, list=14%, signal=32%	HomovsU937	neg
															GO_VENTRICULAR_CARDIAC_MUSCLE_TISSUE_DEVELOPMENT	GO_VENTRICULAR_CARDIAC_MUSCLE_TISSUE_DEVELOPMENT		27	-0.62854	-1.56352	0.0262812	0.504041	1	615	tags=15%, list=5%, signal=15%	HomovsU937	neg
															GO_KERATINOCYTE_DIFFERENTIATION	GO_KERATINOCYTE_DIFFERENTIATION		63	-0.574232	-1.51598	0.0189521	0.504865	1	1530	tags=21%, list=11%, signal=23%	HomovsHetero	neg
															GO_REGULATION_OF_MEMBRANE_REPOLARIZATION	GO_REGULATION_OF_MEMBRANE_REPOLARIZATION		18	-0.692039	-1.51718	0.0364865	0.505164	1	920	tags=22%, list=7%, signal=24%	HomovsHetero	neg
															GO_REGULATION_OF_NERVOUS_SYSTEM_PROCESS	GO_REGULATION_OF_NERVOUS_SYSTEM_PROCESS		77	-0.550696	-1.56528	0.00556174	0.505183	1	2343	tags=32%, list=17%, signal=39%	HomovsU937	neg
															GO_CELLULAR_RESPONSE_TO_EPINEPHRINE_STIMULUS	GO_CELLULAR_RESPONSE_TO_EPINEPHRINE_STIMULUS		10	-0.755016	-1.53762	0.0433437	0.505447	1	1213	tags=30%, list=9%, signal=33%	HomovsU937	neg
															GO_NAD_BIOSYNTHETIC_PROCESS	GO_NAD_BIOSYNTHETIC_PROCESS		18	-0.678556	-1.51137	0.0482094	0.505671	1	114	tags=11%, list=1%, signal=11%	HomovsHetero	neg
															GO_ANATOMICAL_STRUCTURE_ARRANGEMENT	GO_ANATOMICAL_STRUCTURE_ARRANGEMENT		12	-0.744363	-1.58811	0.0278592	0.506109	1	758	tags=25%, list=6%, signal=26%	HomovsU937	neg
															GO_PEPTIDYL_L_CYSTEINE_S_PALMITOYLATION	GO_PEPTIDYL_L_CYSTEINE_S_PALMITOYLATION		18	-0.690441	-1.58137	0.0215633	0.506139	1	1719	tags=33%, list=13%, signal=38%	HomovsU937	neg
															GO_GLOMERULUS_DEVELOPMENT	GO_GLOMERULUS_DEVELOPMENT		29	-0.615567	-1.53813	0.0301508	0.506871	1	514	tags=17%, list=4%, signal=18%	HomovsU937	neg
															GO_NEGATIVE_REGULATION_OF_COAGULATION	GO_NEGATIVE_REGULATION_OF_COAGULATION		25	-0.639895	-1.56775	0.0313725	0.507112	1	1873	tags=44%, list=14%, signal=51%	HomovsU937	neg
															GO_CGMP_MEDIATED_SIGNALING	GO_CGMP_MEDIATED_SIGNALING		11	-0.749866	-1.53569	0.0289634	0.507114	1	295	tags=27%, list=2%, signal=28%	HomovsU937	neg
															GO_REGULATION_OF_METANEPHROS_DEVELOPMENT	GO_REGULATION_OF_METANEPHROS_DEVELOPMENT		11	-0.750864	-1.51614	0.0377644	0.507185	1	286	tags=27%, list=2%, signal=28%	HomovsHetero	neg
															GO_AUTONOMIC_NERVOUS_SYSTEM_DEVELOPMENT	GO_AUTONOMIC_NERVOUS_SYSTEM_DEVELOPMENT		17	-0.680394	-1.56386	0.0340426	0.507242	1	665	tags=18%, list=5%, signal=19%	HomovsU937	neg
															GO_FOREBRAIN_NEURON_DIFFERENTIATION	GO_FOREBRAIN_NEURON_DIFFERENTIATION		21	-0.662968	-1.57279	0.0312925	0.507291	1	805	tags=29%, list=6%, signal=30%	HomovsU937	neg
															GO_CALCIUM_MEDIATED_SIGNALING_USING_INTRACELLULAR_CALCIUM_SOURCE	GO_CALCIUM_MEDIATED_SIGNALING_USING_INTRACELLULAR_CALCIUM_SOURCE		11	-0.74445	-1.53484	0.0262774	0.507474	1	958	tags=27%, list=7%, signal=29%	HomovsU937	neg
															GO_HAIR_FOLLICLE_MATURATION	GO_HAIR_FOLLICLE_MATURATION		12	-0.727732	-1.51154	0.0632353	0.507892	1	1350	tags=25%, list=10%, signal=28%	HomovsHetero	neg
															GO_ANTIMICROBIAL_HUMORAL_IMMUNE_RESPONSE_MEDIATED_BY_ANTIMICROBIAL_PEPTIDE	GO_ANTIMICROBIAL_HUMORAL_IMMUNE_RESPONSE_MEDIATED_BY_ANTIMICROBIAL_PEPTIDE		15	-0.711136	-1.57892	0.0205279	0.508049	1	1495	tags=47%, list=11%, signal=52%	HomovsU937	neg
															GO_ODONTOGENESIS_OF_DENTIN_CONTAINING_TOOTH	GO_ODONTOGENESIS_OF_DENTIN_CONTAINING_TOOTH		46	-0.578352	-1.54838	0.0117786	0.508424	1	604	tags=17%, list=4%, signal=18%	HomovsU937	neg
															GO_DENDRITIC_SPINE_MAINTENANCE	GO_DENDRITIC_SPINE_MAINTENANCE		16	-0.688334	-1.54917	0.0363129	0.50844	1	1702	tags=44%, list=13%, signal=50%	HomovsU937	neg
															GO_REGULATION_OF_MACROPHAGE_ACTIVATION	GO_REGULATION_OF_MACROPHAGE_ACTIVATION		29	-0.628096	-1.57044	0.0163728	0.509168	1	352	tags=14%, list=3%, signal=14%	HomovsU937	neg
															GO_POSITIVE_REGULATION_OF_PATHWAY_RESTRICTED_SMAD_PROTEIN_PHOSPHORYLATION	GO_POSITIVE_REGULATION_OF_PATHWAY_RESTRICTED_SMAD_PROTEIN_PHOSPHORYLATION		19	-0.669766	-1.57143	0.0339213	0.5092	1	952	tags=26%, list=7%, signal=28%	HomovsU937	neg
															GO_MACROPHAGE_CHEMOTAXIS	GO_MACROPHAGE_CHEMOTAXIS		18	-0.688024	-1.56536	0.0305556	0.509776	1	936	tags=28%, list=7%, signal=30%	HomovsU937	neg
															GO_DETECTION_OF_STIMULUS	GO_DETECTION_OF_STIMULUS		130	-0.532032	-1.56627	0.00206825	0.510024	1	1933	tags=26%, list=14%, signal=30%	HomovsU937	neg
															GO_REGULATION_OF_SIGNALING_RECEPTOR_ACTIVITY	GO_REGULATION_OF_SIGNALING_RECEPTOR_ACTIVITY		84	-0.544564	-1.53819	0.00649351	0.510418	1	1397	tags=25%, list=10%, signal=28%	HomovsU937	neg
															GO_N_GLYCAN_PROCESSING	GO_N_GLYCAN_PROCESSING	Details ...	13	0.709059	1.83376	0.0123839	0.510442	0.957	226	tags=23%, list=2%, signal=23%	HomovsHetero	pos
															GO_AORTA_MORPHOGENESIS	GO_AORTA_MORPHOGENESIS		17	-0.672011	-1.53574	0.0369844	0.510616	1	615	tags=24%, list=5%, signal=25%	HomovsU937	neg
															GO_NEUROPEPTIDE_SIGNALING_PATHWAY	GO_NEUROPEPTIDE_SIGNALING_PATHWAY		23	-0.670734	-1.51159	0.0407895	0.510638	1	1060	tags=17%, list=8%, signal=19%	HomovsHetero	neg
															GO_INFLAMMATORY_RESPONSE_TO_ANTIGENIC_STIMULUS	GO_INFLAMMATORY_RESPONSE_TO_ANTIGENIC_STIMULUS		33	-0.625468	-1.58156	0.0110837	0.510945	1	1880	tags=36%, list=14%, signal=42%	HomovsU937	neg
															GO_REGULATION_OF_PROTEIN_TYROSINE_KINASE_ACTIVITY	GO_REGULATION_OF_PROTEIN_TYROSINE_KINASE_ACTIVITY		59	-0.573713	-1.57935	0.00460299	0.511561	1	958	tags=19%, list=7%, signal=20%	HomovsU937	neg
															GO_NEGATIVE_REGULATION_OF_CELL_SUBSTRATE_JUNCTION_ORGANIZATION	GO_NEGATIVE_REGULATION_OF_CELL_SUBSTRATE_JUNCTION_ORGANIZATION		10	-0.626443	-1.36581	0.12605	0.5121	1	2013	tags=30%, list=15%, signal=35%	HeterovsU937	neg
															GO_ACUTE_INFLAMMATORY_RESPONSE_TO_ANTIGENIC_STIMULUS	GO_ACUTE_INFLAMMATORY_RESPONSE_TO_ANTIGENIC_STIMULUS		15	-0.708168	-1.51257	0.0430416	0.512296	1	484	tags=20%, list=4%, signal=21%	HomovsHetero	neg
															GO_POSITIVE_REGULATION_OF_CELLULAR_EXTRAVASATION	GO_POSITIVE_REGULATION_OF_CELLULAR_EXTRAVASATION		10	-0.761584	-1.53306	0.0393343	0.512538	1	1698	tags=60%, list=13%, signal=69%	HomovsU937	neg
															GO_REGULATION_OF_PRODUCTION_OF_MOLECULAR_MEDIATOR_OF_IMMUNE_RESPONSE	GO_REGULATION_OF_PRODUCTION_OF_MOLECULAR_MEDIATOR_OF_IMMUNE_RESPONSE		89	-0.416684	-1.36515	0.0679612	0.512546	1	3101	tags=35%, list=23%, signal=45%	HeterovsU937	neg
															GO_HEAD_MORPHOGENESIS	GO_HEAD_MORPHOGENESIS		22	-0.666438	-1.51183	0.0532623	0.51256	1	185	tags=14%, list=1%, signal=14%	HomovsHetero	neg
															GO_REGULATION_OF_CHONDROCYTE_DIFFERENTIATION	GO_REGULATION_OF_CHONDROCYTE_DIFFERENTIATION		28	-0.617257	-1.54573	0.0245796	0.512823	1	2876	tags=43%, list=21%, signal=54%	HomovsU937	neg
															GO_POSITIVE_REGULATION_OF_NEUROTRANSMITTER_TRANSPORT	GO_POSITIVE_REGULATION_OF_NEUROTRANSMITTER_TRANSPORT	Details ...	18	0.678038	1.95143	0	0.45998	0.807	959	tags=28%, list=7%, signal=30%	HomovsU937	pos
															GO_MODIFIED_AMINO_ACID_TRANSPORT	GO_MODIFIED_AMINO_ACID_TRANSPORT		14	-0.594128	-1.36586	0.116838	0.513277	1	2055	tags=36%, list=15%, signal=42%	HeterovsU937	neg
															GO_NEGATIVE_REGULATION_OF_TYPE_I_INTERFERON_PRODUCTION	GO_NEGATIVE_REGULATION_OF_TYPE_I_INTERFERON_PRODUCTION		40	-0.468945	-1.36632	0.109656	0.513287	1	3070	tags=33%, list=23%, signal=42%	HeterovsU937	neg
															GO_KILLING_OF_CELLS_OF_OTHER_ORGANISM	GO_KILLING_OF_CELLS_OF_OTHER_ORGANISM		17	-0.690643	-1.58218	0.0442857	0.513643	1	1982	tags=41%, list=15%, signal=48%	HomovsU937	neg
															GO_HEMATOPOIETIC_STEM_CELL_PROLIFERATION	GO_HEMATOPOIETIC_STEM_CELL_PROLIFERATION	Details ...	16	0.627604	1.78376	0.00671141	0.513712	0.998	980	tags=19%, list=7%, signal=20%	HomovsU937	pos
															GO_REGULATION_OF_CALCIUM_ION_TRANSMEMBRANE_TRANSPORTER_ACTIVITY	GO_REGULATION_OF_CALCIUM_ION_TRANSMEMBRANE_TRANSPORTER_ACTIVITY		48	-0.567066	-1.54389	0.0164127	0.513833	1	1273	tags=23%, list=9%, signal=25%	HomovsU937	neg
															GO_REGULATION_OF_SYSTEMIC_ARTERIAL_BLOOD_PRESSURE_BY_HORMONE	GO_REGULATION_OF_SYSTEMIC_ARTERIAL_BLOOD_PRESSURE_BY_HORMONE		14	-0.687888	-1.5382	0.0481586	0.514294	1	2627	tags=57%, list=19%, signal=71%	HomovsU937	neg
															GO_POSITIVE_REGULATION_OF_ENDOTHELIAL_CELL_PROLIFERATION	GO_POSITIVE_REGULATION_OF_ENDOTHELIAL_CELL_PROLIFERATION		53	-0.571631	-1.54294	0.0188014	0.514516	1	844	tags=15%, list=6%, signal=16%	HomovsU937	neg
															GO_DETECTION_OF_VISIBLE_LIGHT	GO_DETECTION_OF_VISIBLE_LIGHT		27	-0.657456	-1.5127	0.0328698	0.514771	1	1422	tags=33%, list=10%, signal=37%	HomovsHetero	neg
															GO_REGULATION_OF_LONG_TERM_NEURONAL_SYNAPTIC_PLASTICITY	GO_REGULATION_OF_LONG_TERM_NEURONAL_SYNAPTIC_PLASTICITY		19	-0.678436	-1.51322	0.0436562	0.515517	1	2536	tags=58%, list=19%, signal=71%	HomovsHetero	neg
															GO_NEUROTROPHIN_TRK_RECEPTOR_SIGNALING_PATHWAY	GO_NEUROTROPHIN_TRK_RECEPTOR_SIGNALING_PATHWAY		19	-0.674215	-1.53866	0.0305981	0.516002	1	746	tags=21%, list=5%, signal=22%	HomovsU937	neg
															GO_PROTEIN_ACTIVATION_CASCADE	GO_PROTEIN_ACTIVATION_CASCADE		11	-0.736225	-1.54426	0.0393586	0.516038	1	2744	tags=73%, list=20%, signal=91%	HomovsU937	neg
															GO_PURINERGIC_NUCLEOTIDE_RECEPTOR_SIGNALING_PATHWAY	GO_PURINERGIC_NUCLEOTIDE_RECEPTOR_SIGNALING_PATHWAY		13	-0.723098	-1.58284	0.0231214	0.516288	1	2616	tags=69%, list=19%, signal=86%	HomovsU937	neg
															GO_PEPTIDYL_SERINE_DEPHOSPHORYLATION	GO_PEPTIDYL_SERINE_DEPHOSPHORYLATION		14	-0.706803	-1.54091	0.0372493	0.516577	1	26	tags=7%, list=0%, signal=7%	HomovsU937	neg
															GO_INTERFERON_GAMMA_MEDIATED_SIGNALING_PATHWAY	GO_INTERFERON_GAMMA_MEDIATED_SIGNALING_PATHWAY		56	-0.568117	-1.54576	0.00938967	0.516923	1	2822	tags=38%, list=21%, signal=47%	HomovsU937	neg
															GO_REGULATION_OF_GLUTAMATE_RECEPTOR_SIGNALING_PATHWAY	GO_REGULATION_OF_GLUTAMATE_RECEPTOR_SIGNALING_PATHWAY		34	-0.635812	-1.50832	0.0280146	0.517194	1	1642	tags=38%, list=12%, signal=43%	HomovsHetero	neg
															GO_POSITIVE_REGULATION_OF_STRIATED_MUSCLE_CELL_APOPTOTIC_PROCESS	GO_POSITIVE_REGULATION_OF_STRIATED_MUSCLE_CELL_APOPTOTIC_PROCESS		10	-0.63198	-1.36261	0.127551	0.518275	1	2567	tags=40%, list=19%, signal=49%	HeterovsU937	neg
															GO_REGULATION_OF_MAST_CELL_ACTIVATION_INVOLVED_IN_IMMUNE_RESPONSE	GO_REGULATION_OF_MAST_CELL_ACTIVATION_INVOLVED_IN_IMMUNE_RESPONSE	Details ...	23	0.614088	1.84463	0.00884956	0.51844	0.944	3075	tags=48%, list=23%, signal=62%	HomovsHetero	pos
															GO_NEGATIVE_REGULATION_OF_RESPONSE_TO_WOUNDING	GO_NEGATIVE_REGULATION_OF_RESPONSE_TO_WOUNDING		47	-0.57648	-1.53881	0.0240964	0.519293	1	1437	tags=30%, list=11%, signal=33%	HomovsU937	neg
															GO_DETECTION_OF_LIGHT_STIMULUS	GO_DETECTION_OF_LIGHT_STIMULUS		31	-0.639085	-1.50724	0.0404551	0.519436	1	1422	tags=32%, list=10%, signal=36%	HomovsHetero	neg
															GO_POSITIVE_REGULATION_OF_OSTEOCLAST_DIFFERENTIATION	GO_POSITIVE_REGULATION_OF_OSTEOCLAST_DIFFERENTIATION	Details ...	13	0.731638	1.86669	0	0.720113	0.894	357	tags=31%, list=3%, signal=32%	HomovsHetero	pos
															GO_PURINE_CONTAINING_COMPOUND_CATABOLIC_PROCESS	GO_PURINE_CONTAINING_COMPOUND_CATABOLIC_PROCESS		34	-0.483497	-1.36161	0.0979381	0.51991	1	2427	tags=32%, list=18%, signal=39%	HeterovsU937	neg
															GO_LYMPHOID_PROGENITOR_CELL_DIFFERENTIATION	GO_LYMPHOID_PROGENITOR_CELL_DIFFERENTIATION	Details ...	13	0.683686	1.83536	0.0103806	0.520228	0.994	3799	tags=77%, list=28%, signal=107%	HomovsU937	pos
															GO_NEGATIVE_REGULATION_OF_BLOOD_VESSEL_ENDOTHELIAL_CELL_MIGRATION	GO_NEGATIVE_REGULATION_OF_BLOOD_VESSEL_ENDOTHELIAL_CELL_MIGRATION		24	-0.632222	-1.54096	0.0230978	0.520426	1	112	tags=13%, list=1%, signal=13%	HomovsU937	neg
															GO_INTERFERON_GAMMA_MEDIATED_SIGNALING_PATHWAY	GO_INTERFERON_GAMMA_MEDIATED_SIGNALING_PATHWAY		56	-0.440435	-1.35836	0.0713101	0.520947	1	3363	tags=41%, list=25%, signal=54%	HeterovsU937	neg
															GO_REGULATION_OF_MACROPHAGE_MIGRATION	GO_REGULATION_OF_MACROPHAGE_MIGRATION		20	-0.659887	-1.53927	0.0330688	0.520992	1	1093	tags=30%, list=8%, signal=33%	HomovsU937	neg
															GO_ATRIAL_CARDIAC_MUSCLE_CELL_TO_AV_NODE_CELL_SIGNALING	GO_ATRIAL_CARDIAC_MUSCLE_CELL_TO_AV_NODE_CELL_SIGNALING		11	-0.749048	-1.58423	0.0350365	0.520995	1	658	tags=27%, list=5%, signal=29%	HomovsU937	neg
															GO_POSITIVE_REGULATION_OF_MYELOID_LEUKOCYTE_MEDIATED_IMMUNITY	GO_POSITIVE_REGULATION_OF_MYELOID_LEUKOCYTE_MEDIATED_IMMUNITY		25	-0.509014	-1.36077	0.0886957	0.521032	1	3101	tags=44%, list=23%, signal=57%	HeterovsU937	neg
															GO_POSITIVE_REGULATION_OF_DENDRITIC_SPINE_DEVELOPMENT	GO_POSITIVE_REGULATION_OF_DENDRITIC_SPINE_DEVELOPMENT		34	-0.483025	-1.35856	0.0935374	0.521687	1	1977	tags=29%, list=15%, signal=34%	HeterovsU937	neg
															GO_PORE_COMPLEX_ASSEMBLY	GO_PORE_COMPLEX_ASSEMBLY		19	-0.652332	-1.49866	0.0368349	0.521847	1	1324	tags=16%, list=10%, signal=17%	HomovsU937	neg
															GO_CELL_JUNCTION_MAINTENANCE	GO_CELL_JUNCTION_MAINTENANCE		21	-0.67601	-1.58294	0.0108401	0.521919	1	2329	tags=52%, list=17%, signal=63%	HomovsU937	neg
															GO_REGULATION_OF_STRIATED_MUSCLE_CONTRACTION	GO_REGULATION_OF_STRIATED_MUSCLE_CONTRACTION		44	-0.468336	-1.35893	0.0931034	0.521974	1	1878	tags=32%, list=14%, signal=37%	HeterovsU937	neg
															GO_REGULATION_OF_HUMORAL_IMMUNE_RESPONSE	GO_REGULATION_OF_HUMORAL_IMMUNE_RESPONSE	Details ...	30	-0.670969	-1.83949	0.00160514	0.521974	0.986	1482	tags=57%, list=11%, signal=63%	HeterovsU937	neg
															GO_POSITIVE_REGULATION_OF_COLD_INDUCED_THERMOGENESIS	GO_POSITIVE_REGULATION_OF_COLD_INDUCED_THERMOGENESIS		55	-0.54373	-1.498	0.0301974	0.522114	1	1713	tags=22%, list=13%, signal=25%	HomovsU937	neg
															GO_SENSORY_PERCEPTION_OF_LIGHT_STIMULUS	GO_SENSORY_PERCEPTION_OF_LIGHT_STIMULUS		88	-0.413805	-1.35973	0.0714286	0.522451	1	2142	tags=32%, list=16%, signal=38%	HeterovsU937	neg
															GO_POSITIVE_REGULATION_OF_INFLAMMATORY_RESPONSE	GO_POSITIVE_REGULATION_OF_INFLAMMATORY_RESPONSE		76	-0.419909	-1.35913	0.0837438	0.522758	1	2030	tags=30%, list=15%, signal=35%	HeterovsU937	neg
															GO_RECEPTOR_LOCALIZATION_TO_SYNAPSE	GO_RECEPTOR_LOCALIZATION_TO_SYNAPSE		32	-0.487918	-1.35575	0.125	0.524343	1	2228	tags=38%, list=16%, signal=45%	HeterovsU937	neg
															GO_POSITIVE_REGULATION_OF_MYELOID_LEUKOCYTE_CYTOKINE_PRODUCTION_INVOLVED_IN_IMMUNE_RESPONSE	GO_POSITIVE_REGULATION_OF_MYELOID_LEUKOCYTE_CYTOKINE_PRODUCTION_INVOLVED_IN_IMMUNE_RESPONSE		14	-0.691965	-1.49868	0.057554	0.524598	1	2665	tags=43%, list=20%, signal=53%	HomovsU937	neg
															GO_REGULATION_OF_MACROPHAGE_ACTIVATION	GO_REGULATION_OF_MACROPHAGE_ACTIVATION		29	-0.488235	-1.35517	0.114192	0.524617	1	358	tags=14%, list=3%, signal=14%	HeterovsU937	neg
															GO_POSITIVE_REGULATION_OF_ALPHA_BETA_T_CELL_DIFFERENTIATION	GO_POSITIVE_REGULATION_OF_ALPHA_BETA_T_CELL_DIFFERENTIATION		35	-0.478886	-1.35465	0.113636	0.524646	1	1044	tags=20%, list=8%, signal=22%	HeterovsU937	neg
															GO_NEGATIVE_REGULATION_OF_HEART_CONTRACTION	GO_NEGATIVE_REGULATION_OF_HEART_CONTRACTION		13	-0.57154	-1.35602	0.125418	0.524878	1	3071	tags=54%, list=23%, signal=70%	HeterovsU937	neg
															GO_POSTSYNAPSE_ORGANIZATION	GO_POSTSYNAPSE_ORGANIZATION		109	-0.557629	-1.50551	0.00734523	0.525041	1	2432	tags=32%, list=18%, signal=39%	HomovsHetero	neg
															GO_LIPID_STORAGE	GO_LIPID_STORAGE		56	-0.436709	-1.3561	0.0913621	0.525933	1	2166	tags=29%, list=16%, signal=34%	HeterovsU937	neg
															GO_PROTEIN_HYDROXYLATION	GO_PROTEIN_HYDROXYLATION		18	-0.656708	-1.49891	0.053206	0.526435	1	3403	tags=50%, list=25%, signal=67%	HomovsU937	neg
															GO_POSITIVE_REGULATION_OF_PEPTIDYL_TYROSINE_PHOSPHORYLATION	GO_POSITIVE_REGULATION_OF_PEPTIDYL_TYROSINE_PHOSPHORYLATION		100	-0.525812	-1.52631	0.00756757	0.52657	1	1735	tags=26%, list=13%, signal=30%	HomovsU937	neg
															GO_NEUROTROPHIN_SIGNALING_PATHWAY	GO_NEUROTROPHIN_SIGNALING_PATHWAY		24	-0.62507	-1.4962	0.0473062	0.52717	1	746	tags=17%, list=5%, signal=18%	HomovsU937	neg
															GO_POSITIVE_REGULATION_OF_PHOSPHOLIPASE_ACTIVITY	GO_POSITIVE_REGULATION_OF_PHOSPHOLIPASE_ACTIVITY		31	-0.612762	-1.52924	0.029601	0.527266	1	1344	tags=29%, list=10%, signal=32%	HomovsU937	neg
															GO_POSITIVE_REGULATION_OF_PEPTIDYL_TYROSINE_PHOSPHORYLATION	GO_POSITIVE_REGULATION_OF_PEPTIDYL_TYROSINE_PHOSPHORYLATION		100	-0.404481	-1.35327	0.0551948	0.52727	1	1363	tags=27%, list=10%, signal=30%	HeterovsU937	neg
															GO_MAMMARY_GLAND_DUCT_MORPHOGENESIS	GO_MAMMARY_GLAND_DUCT_MORPHOGENESIS		18	-0.654625	-1.52687	0.052774	0.527606	1	1735	tags=33%, list=13%, signal=38%	HomovsU937	neg
															GO_POSITIVE_REGULATION_OF_VASOCONSTRICTION	GO_POSITIVE_REGULATION_OF_VASOCONSTRICTION		13	-0.689048	-1.49922	0.0564972	0.527876	1	2088	tags=46%, list=15%, signal=54%	HomovsU937	neg
															GO_POSITIVE_REGULATION_OF_INTERFERON_GAMMA_PRODUCTION	GO_POSITIVE_REGULATION_OF_INTERFERON_GAMMA_PRODUCTION		34	-0.592354	-1.49547	0.0286426	0.52793	1	1412	tags=26%, list=10%, signal=29%	HomovsU937	neg
															GO_REGULATION_OF_LIPASE_ACTIVITY	GO_REGULATION_OF_LIPASE_ACTIVITY		49	-0.569241	-1.52822	0.0156627	0.528642	1	1344	tags=27%, list=10%, signal=29%	HomovsU937	neg
															GO_RESPONSE_TO_PLATELET_DERIVED_GROWTH_FACTOR	GO_RESPONSE_TO_PLATELET_DERIVED_GROWTH_FACTOR		14	-0.687509	-1.52708	0.0553191	0.530362	1	3139	tags=57%, list=23%, signal=74%	HomovsU937	neg
															GO_MYELOID_LEUKOCYTE_MIGRATION	GO_MYELOID_LEUKOCYTE_MIGRATION		109	-0.514955	-1.50785	0.00530786	0.53041	1	1471	tags=28%, list=11%, signal=31%	HomovsU937	neg
															GO_SPINAL_CORD_DEVELOPMENT	GO_SPINAL_CORD_DEVELOPMENT		55	-0.555405	-1.49926	0.0186916	0.53054	1	1483	tags=16%, list=11%, signal=18%	HomovsU937	neg
															GO_POSITIVE_REGULATION_OF_CARTILAGE_DEVELOPMENT	GO_POSITIVE_REGULATION_OF_CARTILAGE_DEVELOPMENT		17	-0.69051	-1.49387	0.0391608	0.531528	1	1369	tags=29%, list=10%, signal=33%	HomovsHetero	neg
															GO_EPITHELIAL_CELL_APOPTOTIC_PROCESS	GO_EPITHELIAL_CELL_APOPTOTIC_PROCESS		62	-0.443342	-1.35132	0.08	0.531635	1	910	tags=15%, list=7%, signal=15%	HeterovsU937	neg
															GO_PROTEIN_CONTAINING_COMPLEX_REMODELING	GO_PROTEIN_CONTAINING_COMPLEX_REMODELING		12	-0.717993	-1.52079	0.0494186	0.531864	1	770	tags=25%, list=6%, signal=26%	HomovsU937	neg
															GO_CARDIAC_CONDUCTION	GO_CARDIAC_CONDUCTION		66	-0.535168	-1.50281	0.0211581	0.532085	1	1240	tags=20%, list=9%, signal=22%	HomovsU937	neg
															GO_RESPONSE_TO_CHEMOKINE	GO_RESPONSE_TO_CHEMOKINE		27	-0.617053	-1.52228	0.0277778	0.532112	1	2201	tags=44%, list=16%, signal=53%	HomovsU937	neg
															GO_LABYRINTHINE_LAYER_DEVELOPMENT	GO_LABYRINTHINE_LAYER_DEVELOPMENT		27	-0.636851	-1.49432	0.037859	0.532133	1	982	tags=19%, list=7%, signal=20%	HomovsHetero	neg
															GO_REGULATION_OF_CARTILAGE_DEVELOPMENT	GO_REGULATION_OF_CARTILAGE_DEVELOPMENT		37	-0.590834	-1.52142	0.0249406	0.532384	1	2876	tags=35%, list=21%, signal=44%	HomovsU937	neg
															GO_REGULATION_OF_RESPONSE_TO_WOUNDING	GO_REGULATION_OF_RESPONSE_TO_WOUNDING		99	-0.523699	-1.5199	0.00638298	0.53276	1	1437	tags=21%, list=11%, signal=24%	HomovsU937	neg
															GO_PROTEIN_LIPID_COMPLEX_SUBUNIT_ORGANIZATION	GO_PROTEIN_LIPID_COMPLEX_SUBUNIT_ORGANIZATION		27	-0.610562	-1.52358	0.0294872	0.532924	1	1691	tags=26%, list=12%, signal=30%	HomovsU937	neg
															GO_CYCLIC_NUCLEOTIDE_METABOLIC_PROCESS	GO_CYCLIC_NUCLEOTIDE_METABOLIC_PROCESS		19	-0.646364	-1.50461	0.0544218	0.532969	1	2168	tags=42%, list=16%, signal=50%	HomovsU937	neg
															GO_ENDOTHELIAL_CELL_DEVELOPMENT	GO_ENDOTHELIAL_CELL_DEVELOPMENT		45	-0.555608	-1.50795	0.0309524	0.533085	1	1698	tags=22%, list=13%, signal=25%	HomovsU937	neg
															GO_DENDRITIC_SPINE_MORPHOGENESIS	GO_DENDRITIC_SPINE_MORPHOGENESIS		44	-0.568115	-1.49934	0.0286055	0.533164	1	1324	tags=25%, list=10%, signal=28%	HomovsU937	neg
															GO_REGULATION_OF_PHOSPHOLIPASE_ACTIVITY	GO_REGULATION_OF_PHOSPHOLIPASE_ACTIVITY		35	-0.592432	-1.5052	0.028786	0.533424	1	1344	tags=26%, list=10%, signal=28%	HomovsU937	neg
															GO_REGULATION_OF_PRESYNAPSE_ORGANIZATION	GO_REGULATION_OF_PRESYNAPSE_ORGANIZATION		14	-0.725442	-1.49288	0.0588235	0.533687	1	660	tags=29%, list=5%, signal=30%	HomovsHetero	neg
															GO_DETECTION_OF_MECHANICAL_STIMULUS_INVOLVED_IN_SENSORY_PERCEPTION	GO_DETECTION_OF_MECHANICAL_STIMULUS_INVOLVED_IN_SENSORY_PERCEPTION		14	-0.717671	-1.50313	0.0426471	0.53384	1	889	tags=29%, list=7%, signal=31%	HomovsHetero	neg
															GO_PROTEIN_ACTIVATION_CASCADE	GO_PROTEIN_ACTIVATION_CASCADE		11	-0.741443	-1.49227	0.0667634	0.533956	1	1497	tags=36%, list=11%, signal=41%	HomovsHetero	neg
															GO_VASCULAR_PROCESS_IN_CIRCULATORY_SYSTEM	GO_VASCULAR_PROCESS_IN_CIRCULATORY_SYSTEM		87	-0.560818	-1.49449	0.0138741	0.534198	1	1141	tags=21%, list=8%, signal=22%	HomovsHetero	neg
															GO_REGULATION_OF_CHEMOTAXIS	GO_REGULATION_OF_CHEMOTAXIS		116	-0.514801	-1.52254	0.00532481	0.534508	1	1563	tags=27%, list=12%, signal=30%	HomovsU937	neg
															GO_NEUROTRANSMITTER_RECEPTOR_LOCALIZATION_TO_POSTSYNAPTIC_SPECIALIZATION_MEMBRANE	GO_NEUROTRANSMITTER_RECEPTOR_LOCALIZATION_TO_POSTSYNAPTIC_SPECIALIZATION_MEMBRANE		11	-0.610134	-1.34652	0.14082	0.534545	1	2552	tags=64%, list=19%, signal=78%	HeterovsU937	neg
															GO_REGULATION_OF_NEURONAL_SYNAPTIC_PLASTICITY	GO_REGULATION_OF_NEURONAL_SYNAPTIC_PLASTICITY		37	-0.587619	-1.50357	0.0325407	0.534574	1	2342	tags=35%, list=17%, signal=42%	HomovsU937	neg
															GO_NEGATIVE_REGULATION_OF_MACROPHAGE_ACTIVATION	GO_NEGATIVE_REGULATION_OF_MACROPHAGE_ACTIVATION		12	-0.723692	-1.5083	0.0402299	0.534578	1	352	tags=25%, list=3%, signal=26%	HomovsU937	neg
															GO_DETECTION_OF_MECHANICAL_STIMULUS	GO_DETECTION_OF_MECHANICAL_STIMULUS		23	-0.614174	-1.50292	0.0560748	0.534607	1	1670	tags=35%, list=12%, signal=40%	HomovsU937	neg
															GO_MUSCLE_CELL_CELLULAR_HOMEOSTASIS	GO_MUSCLE_CELL_CELLULAR_HOMEOSTASIS		10	-0.627643	-1.34589	0.120135	0.535022	1	3615	tags=60%, list=27%, signal=82%	HeterovsU937	neg
															GO_CORPUS_CALLOSUM_DEVELOPMENT	GO_CORPUS_CALLOSUM_DEVELOPMENT		19	-0.64387	-1.50152	0.058906	0.535125	1	842	tags=21%, list=6%, signal=22%	HomovsU937	neg
															GO_CELL_CELL_JUNCTION_ORGANIZATION	GO_CELL_CELL_JUNCTION_ORGANIZATION		116	-0.51016	-1.50548	0.0117396	0.535165	1	1100	tags=21%, list=8%, signal=22%	HomovsU937	neg
															GO_ADHERENS_JUNCTION_ORGANIZATION	GO_ADHERENS_JUNCTION_ORGANIZATION		40	-0.575941	-1.50955	0.0224439	0.53522	1	1345	tags=25%, list=10%, signal=28%	HomovsU937	neg
															GO_PROTEIN_LOCALIZATION_TO_GOLGI_APPARATUS	GO_PROTEIN_LOCALIZATION_TO_GOLGI_APPARATUS		24	-0.519298	-1.34675	0.133681	0.535242	1	15	tags=4%, list=0%, signal=4%	HeterovsU937	neg
															GO_NEGATIVE_REGULATION_OF_CHONDROCYTE_DIFFERENTIATION	GO_NEGATIVE_REGULATION_OF_CHONDROCYTE_DIFFERENTIATION		10	-0.717544	-1.49952	0.0660522	0.535243	1	585	tags=20%, list=4%, signal=21%	HomovsU937	neg
															GO_EMBRYONIC_PATTERN_SPECIFICATION	GO_EMBRYONIC_PATTERN_SPECIFICATION		37	-0.587199	-1.52392	0.0313676	0.535249	1	347	tags=16%, list=3%, signal=17%	HomovsU937	neg
															GO_AMYLOID_FIBRIL_FORMATION	GO_AMYLOID_FIBRIL_FORMATION		13	-0.585482	-1.34939	0.138434	0.5357	1	19	tags=8%, list=0%, signal=8%	HeterovsU937	neg
															GO_CALCIUM_ION_REGULATED_EXOCYTOSIS	GO_CALCIUM_ION_REGULATED_EXOCYTOSIS		38	-0.613391	-1.49542	0.034398	0.535703	1	1511	tags=34%, list=11%, signal=38%	HomovsHetero	neg
															GO_POSITIVE_REGULATION_OF_RESPONSE_TO_WOUNDING	GO_POSITIVE_REGULATION_OF_RESPONSE_TO_WOUNDING		37	-0.580576	-1.50007	0.04	0.535787	1	1373	tags=19%, list=10%, signal=21%	HomovsU937	neg
															GO_MORPHOGENESIS_OF_AN_ENDOTHELIUM	GO_MORPHOGENESIS_OF_AN_ENDOTHELIUM		10	-0.730626	-1.51777	0.0548961	0.535949	1	112	tags=20%, list=1%, signal=20%	HomovsU937	neg
															GO_REGULATION_OF_DEFENSE_RESPONSE_TO_VIRUS_BY_HOST	GO_REGULATION_OF_DEFENSE_RESPONSE_TO_VIRUS_BY_HOST		28	-0.502172	-1.3474	0.129371	0.535978	1	1097	tags=21%, list=8%, signal=23%	HeterovsU937	neg
															GO_TUMOR_NECROSIS_FACTOR_SUPERFAMILY_CYTOKINE_PRODUCTION	GO_TUMOR_NECROSIS_FACTOR_SUPERFAMILY_CYTOKINE_PRODUCTION		100	-0.397513	-1.34513	0.0681818	0.535996	1	1486	tags=21%, list=11%, signal=23%	HeterovsU937	neg
															GO_POST_EMBRYONIC_ANIMAL_ORGAN_DEVELOPMENT	GO_POST_EMBRYONIC_ANIMAL_ORGAN_DEVELOPMENT		11	-0.609043	-1.34882	0.140411	0.536018	1	1552	tags=36%, list=11%, signal=41%	HeterovsU937	neg
															GO_RESPIRATORY_ELECTRON_TRANSPORT_CHAIN	GO_RESPIRATORY_ELECTRON_TRANSPORT_CHAIN		92	-0.529161	-1.51701	0.00877193	0.536087	1	3902	tags=46%, list=29%, signal=64%	HomovsU937	neg
															GO_REGULATION_OF_VIRAL_ENTRY_INTO_HOST_CELL	GO_REGULATION_OF_VIRAL_ENTRY_INTO_HOST_CELL		22	-0.64123	-1.51634	0.036635	0.536093	1	629	tags=14%, list=5%, signal=14%	HomovsU937	neg
															GO_DEFENSE_RESPONSE_TO_GRAM_NEGATIVE_BACTERIUM	GO_DEFENSE_RESPONSE_TO_GRAM_NEGATIVE_BACTERIUM		27	-0.617547	-1.51846	0.0384615	0.536111	1	2139	tags=41%, list=16%, signal=48%	HomovsU937	neg
															GO_KIDNEY_EPITHELIUM_DEVELOPMENT	GO_KIDNEY_EPITHELIUM_DEVELOPMENT		71	-0.57032	-1.49588	0.01766	0.536204	1	600	tags=14%, list=4%, signal=15%	HomovsHetero	neg
															GO_REGULATION_OF_SYSTEMIC_ARTERIAL_BLOOD_PRESSURE_BY_RENIN_ANGIOTENSIN	GO_REGULATION_OF_SYSTEMIC_ARTERIAL_BLOOD_PRESSURE_BY_RENIN_ANGIOTENSIN		11	-0.706877	-1.50595	0.0520674	0.536286	1	2627	tags=55%, list=19%, signal=68%	HomovsU937	neg
															GO_MACROPHAGE_MIGRATION	GO_MACROPHAGE_MIGRATION		26	-0.662802	-1.49466	0.0300654	0.536361	1	907	tags=35%, list=7%, signal=37%	HomovsHetero	neg
															GO_DOPAMINE_RECEPTOR_SIGNALING_PATHWAY	GO_DOPAMINE_RECEPTOR_SIGNALING_PATHWAY		21	-0.527079	-1.3468	0.133094	0.536384	1	2230	tags=29%, list=16%, signal=34%	HeterovsU937	neg
															GO_REGULATION_OF_IMMUNOGLOBULIN_PRODUCTION	GO_REGULATION_OF_IMMUNOGLOBULIN_PRODUCTION		45	-0.449285	-1.34802	0.114094	0.536817	1	1310	tags=18%, list=10%, signal=20%	HeterovsU937	neg
															GO_T_HELPER_17_TYPE_IMMUNE_RESPONSE	GO_T_HELPER_17_TYPE_IMMUNE_RESPONSE		17	-0.553188	-1.34424	0.130909	0.537032	1	3047	tags=41%, list=22%, signal=53%	HeterovsU937	neg
															GO_POSITIVE_REGULATION_OF_LIPASE_ACTIVITY	GO_POSITIVE_REGULATION_OF_LIPASE_ACTIVITY		37	-0.579977	-1.50045	0.0359802	0.537059	1	1344	tags=24%, list=10%, signal=27%	HomovsU937	neg
															GO_FATTY_ACID_BETA_OXIDATION_USING_ACYL_COA_OXIDASE	GO_FATTY_ACID_BETA_OXIDATION_USING_ACYL_COA_OXIDASE		13	-0.578109	-1.34329	0.141156	0.53712	1	342	tags=15%, list=3%, signal=16%	HeterovsU937	neg
															GO_BONE_RESORPTION	GO_BONE_RESORPTION		38	-0.464486	-1.34373	0.105705	0.53722	1	1253	tags=24%, list=9%, signal=26%	HeterovsU937	neg
															GO_EMBRYONIC_DIGIT_MORPHOGENESIS	GO_EMBRYONIC_DIGIT_MORPHOGENESIS		38	-0.602793	-1.49686	0.0377359	0.537262	1	1494	tags=24%, list=11%, signal=27%	HomovsHetero	neg
															GO_PEPTIDYL_ARGININE_MODIFICATION	GO_PEPTIDYL_ARGININE_MODIFICATION		17	-0.552208	-1.3474	0.141608	0.537282	1	1670	tags=24%, list=12%, signal=27%	HeterovsU937	neg
															GO_RESPONSE_TO_MUSCLE_STRETCH	GO_RESPONSE_TO_MUSCLE_STRETCH		12	-0.713303	-1.50835	0.0486009	0.537541	1	767	tags=17%, list=6%, signal=18%	HomovsU937	neg
															GO_MULTICELLULAR_ORGANISM_AGING	GO_MULTICELLULAR_ORGANISM_AGING	Details ...	20	0.565897	1.76582	0.0155039	0.537601	1	2740	tags=30%, list=20%, signal=38%	HomovsU937	pos
															GO_REGULATION_OF_CATECHOLAMINE_METABOLIC_PROCESS	GO_REGULATION_OF_CATECHOLAMINE_METABOLIC_PROCESS	Details ...	13	0.650508	1.7609	0.0246154	0.537705	1	379	tags=15%, list=3%, signal=16%	HomovsU937	pos
															GO_REGULATION_OF_MACROPHAGE_DERIVED_FOAM_CELL_DIFFERENTIATION	GO_REGULATION_OF_MACROPHAGE_DERIVED_FOAM_CELL_DIFFERENTIATION		13	-0.720577	-1.51378	0.0493469	0.53775	1	770	tags=31%, list=6%, signal=33%	HomovsU937	neg
															GO_KERATINIZATION	GO_KERATINIZATION		19	-0.686264	-1.49619	0.0372836	0.53778	1	1530	tags=42%, list=11%, signal=47%	HomovsHetero	neg
															GO_REGULATION_OF_BLOOD_PRESSURE	GO_REGULATION_OF_BLOOD_PRESSURE		89	-0.524778	-1.50968	0.00759219	0.537867	1	2627	tags=38%, list=19%, signal=47%	HomovsU937	neg
															GO_REGULATION_OF_TRANSPORTER_ACTIVITY	GO_REGULATION_OF_TRANSPORTER_ACTIVITY		153	-0.501897	-1.51033	0.00207684	0.537944	1	1601	tags=23%, list=12%, signal=26%	HomovsU937	neg
															GO_RESPONSE_TO_ANGIOTENSIN	GO_RESPONSE_TO_ANGIOTENSIN		19	-0.684977	-1.49708	0.0373832	0.539114	1	1516	tags=21%, list=11%, signal=24%	HomovsHetero	neg
															GO_FOREBRAIN_GENERATION_OF_NEURONS	GO_FOREBRAIN_GENERATION_OF_NEURONS		27	-0.623152	-1.51491	0.0428571	0.539265	1	805	tags=22%, list=6%, signal=24%	HomovsU937	neg
															GO_COLLAGEN_METABOLIC_PROCESS	GO_COLLAGEN_METABOLIC_PROCESS		55	-0.555675	-1.51207	0.016298	0.539444	1	2405	tags=31%, list=18%, signal=37%	HomovsU937	neg
															GO_BONE_MINERALIZATION	GO_BONE_MINERALIZATION		61	-0.548816	-1.51061	0.0148741	0.539865	1	2020	tags=26%, list=15%, signal=31%	HomovsU937	neg
															GO_NEGATIVE_REGULATION_OF_VASCULATURE_DEVELOPMENT	GO_NEGATIVE_REGULATION_OF_VASCULATURE_DEVELOPMENT		72	-0.423671	-1.34181	0.0740158	0.540245	1	1861	tags=33%, list=14%, signal=38%	HeterovsU937	neg
															GO_LIVER_MORPHOGENESIS	GO_LIVER_MORPHOGENESIS		14	-0.691364	-1.51257	0.0569801	0.540295	1	722	tags=21%, list=5%, signal=23%	HomovsU937	neg
															GO_CONNECTIVE_TISSUE_DEVELOPMENT	GO_CONNECTIVE_TISSUE_DEVELOPMENT		144	-0.539709	-1.50113	0.0041365	0.540599	1	991	tags=17%, list=7%, signal=18%	HomovsHetero	neg
															GO_METANEPHROS_MORPHOGENESIS	GO_METANEPHROS_MORPHOGENESIS		10	-0.73815	-1.51388	0.0472674	0.540706	1	643	tags=40%, list=5%, signal=42%	HomovsU937	neg
															GO_CELL_FATE_COMMITMENT	GO_CELL_FATE_COMMITMENT		125	-0.499747	-1.49192	0.0105485	0.5411	1	2551	tags=29%, list=19%, signal=35%	HomovsU937	neg
															GO_ADAPTIVE_IMMUNE_RESPONSE_BASED_ON_SOMATIC_RECOMBINATION_OF_IMMUNE_RECEPTORS_BUILT_FROM_IMMUNOGLOBULIN_SUPERFAMILY_DOMAINS	GO_ADAPTIVE_IMMUNE_RESPONSE_BASED_ON_SOMATIC_RECOMBINATION_OF_IMMUNE_RECEPTORS_BUILT_FROM_IMMUNOGLOBULIN_SUPERFAMILY_DOMAINS		168	-0.496622	-1.49123	0.00310559	0.541423	1	2329	tags=27%, list=17%, signal=33%	HomovsU937	neg
															GO_MITOCHONDRIAL_ELECTRON_TRANSPORT_NADH_TO_UBIQUINONE	GO_MITOCHONDRIAL_ELECTRON_TRANSPORT_NADH_TO_UBIQUINONE		45	-0.592621	-1.49714	0.0244755	0.54182	1	2954	tags=33%, list=22%, signal=42%	HomovsHetero	neg
															GO_RESPIRATORY_BURST_INVOLVED_IN_DEFENSE_RESPONSE	GO_RESPIRATORY_BURST_INVOLVED_IN_DEFENSE_RESPONSE		10	-0.763224	-1.50025	0.047041	0.542099	1	68	tags=10%, list=1%, signal=10%	HomovsHetero	neg
															GO_POSITIVE_REGULATION_OF_G_PROTEIN_COUPLED_RECEPTOR_SIGNALING_PATHWAY	GO_POSITIVE_REGULATION_OF_G_PROTEIN_COUPLED_RECEPTOR_SIGNALING_PATHWAY		12	-0.708564	-1.49046	0.070073	0.542157	1	1870	tags=42%, list=14%, signal=48%	HomovsU937	neg
															GO_PROSTATE_GLAND_MORPHOGENESIS	GO_PROSTATE_GLAND_MORPHOGENESIS		10	-0.75576	-1.48991	0.0600293	0.542685	1	63	tags=20%, list=0%, signal=20%	HomovsHetero	neg
															GO_NEURON_PROJECTION_GUIDANCE	GO_NEURON_PROJECTION_GUIDANCE		163	-0.534977	-1.4982	0.00512821	0.542923	1	1450	tags=21%, list=11%, signal=24%	HomovsHetero	neg
															GO_RESPONSE_TO_RETINOIC_ACID	GO_RESPONSE_TO_RETINOIC_ACID		60	-0.551812	-1.51062	0.0183697	0.543239	1	1132	tags=22%, list=8%, signal=24%	HomovsU937	neg
															GO_POSITIVE_REGULATION_OF_CHONDROCYTE_DIFFERENTIATION	GO_POSITIVE_REGULATION_OF_CHONDROCYTE_DIFFERENTIATION		13	-0.713006	-1.49939	0.0697329	0.543312	1	1369	tags=38%, list=10%, signal=43%	HomovsHetero	neg
															GO_REGULATION_OF_B_CELL_PROLIFERATION	GO_REGULATION_OF_B_CELL_PROLIFERATION		38	-0.474753	-1.34021	0.101639	0.543549	1	1939	tags=34%, list=14%, signal=40%	HeterovsU937	neg
															GO_PURINERGIC_NUCLEOTIDE_RECEPTOR_SIGNALING_PATHWAY	GO_PURINERGIC_NUCLEOTIDE_RECEPTOR_SIGNALING_PATHWAY		13	-0.718699	-1.49864	0.055313	0.543881	1	1566	tags=38%, list=12%, signal=43%	HomovsHetero	neg
															GO_GASTRULATION_WITH_MOUTH_FORMING_SECOND	GO_GASTRULATION_WITH_MOUTH_FORMING_SECOND		16	-0.694753	-1.49724	0.0520231	0.544447	1	1494	tags=25%, list=11%, signal=28%	HomovsHetero	neg
															GO_INNER_EAR_MORPHOGENESIS	GO_INNER_EAR_MORPHOGENESIS		47	-0.590993	-1.48719	0.0232019	0.544832	1	1051	tags=23%, list=8%, signal=25%	HomovsHetero	neg
															GO_POTASSIUM_ION_EXPORT_ACROSS_PLASMA_MEMBRANE	GO_POTASSIUM_ION_EXPORT_ACROSS_PLASMA_MEMBRANE		10	-0.745603	-1.48813	0.0762332	0.54576	1	8	tags=10%, list=0%, signal=10%	HomovsHetero	neg
															GO_CARDIAC_MUSCLE_CELL_MEMBRANE_REPOLARIZATION	GO_CARDIAC_MUSCLE_CELL_MEMBRANE_REPOLARIZATION		22	-0.651765	-1.48739	0.0454545	0.546728	1	920	tags=23%, list=7%, signal=24%	HomovsHetero	neg
															GO_REGULATION_OF_GLUTAMATE_RECEPTOR_SIGNALING_PATHWAY	GO_REGULATION_OF_GLUTAMATE_RECEPTOR_SIGNALING_PATHWAY		34	-0.482299	-1.33846	0.128824	0.547164	1	1431	tags=44%, list=11%, signal=49%	HeterovsU937	neg
															GO_NEGATIVE_REGULATION_OF_POTASSIUM_ION_TRANSPORT	GO_NEGATIVE_REGULATION_OF_POTASSIUM_ION_TRANSPORT		18	-0.680457	-1.48819	0.0416107	0.548258	1	1141	tags=33%, list=8%, signal=36%	HomovsHetero	neg
															GO_CELL_KILLING	GO_CELL_KILLING		80	-0.521175	-1.48675	0.0155902	0.55063	1	2275	tags=33%, list=17%, signal=39%	HomovsU937	neg
															GO_POSITIVE_REGULATION_OF_NERVOUS_SYSTEM_PROCESS	GO_POSITIVE_REGULATION_OF_NERVOUS_SYSTEM_PROCESS		39	-0.576483	-1.48792	0.032967	0.550997	1	1594	tags=28%, list=12%, signal=32%	HomovsU937	neg
															GO_FOAM_CELL_DIFFERENTIATION	GO_FOAM_CELL_DIFFERENTIATION		18	-0.638294	-1.48723	0.0602241	0.551216	1	2447	tags=44%, list=18%, signal=54%	HomovsU937	neg
															GO_RIBONUCLEOTIDE_CATABOLIC_PROCESS	GO_RIBONUCLEOTIDE_CATABOLIC_PROCESS		22	-0.621532	-1.48593	0.0567568	0.55152	1	3650	tags=59%, list=27%, signal=81%	HomovsU937	neg
															GO_REGULATION_OF_CYTOPLASMIC_MRNA_PROCESSING_BODY_ASSEMBLY	GO_REGULATION_OF_CYTOPLASMIC_MRNA_PROCESSING_BODY_ASSEMBLY		10	-0.713236	-1.48503	0.0644217	0.552802	1	60	tags=10%, list=0%, signal=10%	HomovsU937	neg
															GO_DENDRITIC_CELL_CHEMOTAXIS	GO_DENDRITIC_CELL_CHEMOTAXIS		13	-0.703791	-1.48058	0.0709319	0.553088	1	555	tags=23%, list=4%, signal=24%	HomovsHetero	neg
															GO_REGULATION_OF_KIDNEY_DEVELOPMENT	GO_REGULATION_OF_KIDNEY_DEVELOPMENT		24	-0.654239	-1.48275	0.0573664	0.55312	1	286	tags=17%, list=2%, signal=17%	HomovsHetero	neg
															GO_REGULATION_OF_CALCIUM_ION_IMPORT	GO_REGULATION_OF_CALCIUM_ION_IMPORT		19	-0.521539	-1.33595	0.138225	0.553216	1	1899	tags=37%, list=14%, signal=43%	HeterovsU937	neg
															GO_SPINAL_CORD_DEVELOPMENT	GO_SPINAL_CORD_DEVELOPMENT		55	-0.58338	-1.48205	0.0217143	0.553847	1	2323	tags=25%, list=17%, signal=31%	HomovsHetero	neg
															GO_OSTEOBLAST_DEVELOPMENT	GO_OSTEOBLAST_DEVELOPMENT		12	-0.729227	-1.48064	0.0486009	0.555478	1	600	tags=25%, list=4%, signal=26%	HomovsHetero	neg
															GO_CENTRAL_NERVOUS_SYSTEM_NEURON_AXONOGENESIS	GO_CENTRAL_NERVOUS_SYSTEM_NEURON_AXONOGENESIS		24	-0.652324	-1.48279	0.044757	0.555726	1	1565	tags=29%, list=12%, signal=33%	HomovsHetero	neg
															GO_NEGATIVE_REGULATION_OF_INTRINSIC_APOPTOTIC_SIGNALING_PATHWAY_BY_P53_CLASS_MEDIATOR	GO_NEGATIVE_REGULATION_OF_INTRINSIC_APOPTOTIC_SIGNALING_PATHWAY_BY_P53_CLASS_MEDIATOR		14	0.657378	1.57446	0.0652681	0.556062	1	1552	tags=29%, list=11%, signal=32%	HeterovsU937	pos
															GO_RESPONSE_TO_DSRNA	GO_RESPONSE_TO_DSRNA		31	-0.623434	-1.48423	0.0491184	0.556685	1	457	tags=10%, list=3%, signal=10%	HomovsHetero	neg
															GO_NEGATIVE_REGULATION_OF_SMOOTH_MUSCLE_CELL_PROLIFERATION	GO_NEGATIVE_REGULATION_OF_SMOOTH_MUSCLE_CELL_PROLIFERATION		25	-0.504142	-1.33404	0.123924	0.557241	1	2658	tags=48%, list=20%, signal=60%	HeterovsU937	neg
															GO_GLOMERULAR_EPITHELIUM_DEVELOPMENT	GO_GLOMERULAR_EPITHELIUM_DEVELOPMENT		12	-0.71853	-1.48304	0.0609929	0.5573	1	189	tags=17%, list=1%, signal=17%	HomovsHetero	neg
															GO_PURINERGIC_NUCLEOTIDE_RECEPTOR_SIGNALING_PATHWAY	GO_PURINERGIC_NUCLEOTIDE_RECEPTOR_SIGNALING_PATHWAY		13	-0.566876	-1.33202	0.165794	0.55771	1	1878	tags=31%, list=14%, signal=36%	HeterovsU937	neg
															GO_SENSORY_PERCEPTION_OF_LIGHT_STIMULUS	GO_SENSORY_PERCEPTION_OF_LIGHT_STIMULUS		88	-0.552767	-1.48075	0.0226782	0.557822	1	1965	tags=28%, list=14%, signal=33%	HomovsHetero	neg
															GO_FATTY_ACID_TRANSPORT	GO_FATTY_ACID_TRANSPORT		60	-0.432728	-1.33091	0.0930599	0.558163	1	2572	tags=35%, list=19%, signal=43%	HeterovsU937	neg
															GO_POSITIVE_REGULATION_OF_RECEPTOR_MEDIATED_ENDOCYTOSIS	GO_POSITIVE_REGULATION_OF_RECEPTOR_MEDIATED_ENDOCYTOSIS		32	-0.484998	-1.33134	0.121163	0.558315	1	3299	tags=41%, list=24%, signal=54%	HeterovsU937	neg
															GO_EMBRYONIC_HEART_TUBE_MORPHOGENESIS	GO_EMBRYONIC_HEART_TUBE_MORPHOGENESIS		36	-0.466759	-1.32908	0.120354	0.558345	1	620	tags=14%, list=5%, signal=15%	HeterovsU937	neg
															GO_CORONARY_VASCULATURE_MORPHOGENESIS	GO_CORONARY_VASCULATURE_MORPHOGENESIS		10	-0.603004	-1.33223	0.145359	0.558458	1	2787	tags=50%, list=21%, signal=63%	HeterovsU937	neg
															GO_BRANCHING_MORPHOGENESIS_OF_AN_EPITHELIAL_TUBE	GO_BRANCHING_MORPHOGENESIS_OF_AN_EPITHELIAL_TUBE		79	-0.558889	-1.47887	0.0181818	0.558604	1	1312	tags=19%, list=10%, signal=21%	HomovsHetero	neg
															GO_LONG_CHAIN_FATTY_ACYL_COA_BIOSYNTHETIC_PROCESS	GO_LONG_CHAIN_FATTY_ACYL_COA_BIOSYNTHETIC_PROCESS		12	-0.587059	-1.33304	0.157068	0.55873	1	3370	tags=58%, list=25%, signal=78%	HeterovsU937	neg
															GO_REGULATION_OF_SYNAPTIC_VESICLE_EXOCYTOSIS	GO_REGULATION_OF_SYNAPTIC_VESICLE_EXOCYTOSIS		46	-0.44555	-1.33022	0.114379	0.558906	1	1961	tags=24%, list=14%, signal=28%	HeterovsU937	neg
															GO_HAIR_FOLLICLE_MATURATION	GO_HAIR_FOLLICLE_MATURATION		12	-0.681684	-1.47482	0.0867647	0.558945	1	1273	tags=33%, list=9%, signal=37%	HomovsU937	neg
															GO_CARDIAC_CONDUCTION	GO_CARDIAC_CONDUCTION		66	-0.420378	-1.33239	0.0859504	0.559232	1	1177	tags=23%, list=9%, signal=25%	HeterovsU937	neg
															GO_CYTOKINE_PRODUCTION_INVOLVED_IN_INFLAMMATORY_RESPONSE	GO_CYTOKINE_PRODUCTION_INVOLVED_IN_INFLAMMATORY_RESPONSE		33	-0.484725	-1.32962	0.127731	0.559328	1	1663	tags=21%, list=12%, signal=24%	HeterovsU937	neg
															GO_TUMOR_NECROSIS_FACTOR_BIOSYNTHETIC_PROCESS	GO_TUMOR_NECROSIS_FACTOR_BIOSYNTHETIC_PROCESS		18	-0.546806	-1.32919	0.154255	0.559348	1	1337	tags=33%, list=10%, signal=37%	HeterovsU937	neg
															GO_COAGULATION	GO_COAGULATION		195	-0.482321	-1.47584	0.00509165	0.559519	1	2766	tags=31%, list=20%, signal=38%	HomovsU937	neg
															GO_MITOTIC_SISTER_CHROMATID_SEGREGATION	GO_MITOTIC_SISTER_CHROMATID_SEGREGATION		132	0.434961	1.5747	0.0112676	0.559562	1	3167	tags=40%, list=23%, signal=52%	HeterovsU937	pos
															GO_CENTRAL_NERVOUS_SYSTEM_NEURON_DIFFERENTIATION	GO_CENTRAL_NERVOUS_SYSTEM_NEURON_DIFFERENTIATION		96	-0.547973	-1.48315	0.0106383	0.5596	1	1565	tags=20%, list=12%, signal=22%	HomovsHetero	neg
															GO_EPITHELIAL_CELL_DIFFERENTIATION_INVOLVED_IN_KIDNEY_DEVELOPMENT	GO_EPITHELIAL_CELL_DIFFERENTIATION_INVOLVED_IN_KIDNEY_DEVELOPMENT		20	-0.63627	-1.47751	0.0561497	0.560205	1	514	tags=20%, list=4%, signal=21%	HomovsU937	neg
															GO_MESENCHYME_MORPHOGENESIS	GO_MESENCHYME_MORPHOGENESIS		26	-0.622946	-1.47393	0.0503876	0.560431	1	971	tags=23%, list=7%, signal=25%	HomovsU937	neg
															GO_REGULATION_OF_CATECHOLAMINE_METABOLIC_PROCESS	GO_REGULATION_OF_CATECHOLAMINE_METABOLIC_PROCESS		13	0.654977	1.57202	0.046875	0.560922	1	513	tags=15%, list=4%, signal=16%	HeterovsU937	pos
															GO_RESPONSE_TO_IMMOBILIZATION_STRESS	GO_RESPONSE_TO_IMMOBILIZATION_STRESS		15	-0.656026	-1.47608	0.0631001	0.561104	1	124	tags=13%, list=1%, signal=13%	HomovsU937	neg
															GO_REGULATION_OF_ACTIN_FILAMENT_BASED_MOVEMENT	GO_REGULATION_OF_ACTIN_FILAMENT_BASED_MOVEMENT		23	-0.618925	-1.47493	0.0529101	0.56118	1	2482	tags=57%, list=18%, signal=69%	HomovsU937	neg
															GO_REGULATION_OF_RECEPTOR_RECYCLING	GO_REGULATION_OF_RECEPTOR_RECYCLING		15	-0.65946	-1.47771	0.0767085	0.561943	1	4	tags=7%, list=0%, signal=7%	HomovsU937	neg
															GO_POSITIVE_REGULATION_OF_NUCLEOTIDE_BIOSYNTHETIC_PROCESS	GO_POSITIVE_REGULATION_OF_NUCLEOTIDE_BIOSYNTHETIC_PROCESS		13	-0.678739	-1.48239	0.0764791	0.56255	1	1140	tags=31%, list=8%, signal=34%	HomovsU937	neg
															GO_MICROTUBULE_POLYMERIZATION_OR_DEPOLYMERIZATION	GO_MICROTUBULE_POLYMERIZATION_OR_DEPOLYMERIZATION		87	0.458319	1.57503	0.0125628	0.56288	1	2241	tags=31%, list=16%, signal=37%	HeterovsU937	pos
															GO_KERATINIZATION	GO_KERATINIZATION		19	-0.64871	-1.47627	0.0418919	0.563019	1	1380	tags=32%, list=10%, signal=35%	HomovsU937	neg
															GO_NEGATIVE_REGULATION_OF_POTASSIUM_ION_TRANSMEMBRANE_TRANSPORT	GO_NEGATIVE_REGULATION_OF_POTASSIUM_ION_TRANSMEMBRANE_TRANSPORT		15	-0.711295	-1.47638	0.0505618	0.563116	1	876	tags=33%, list=6%, signal=36%	HomovsHetero	neg
															GO_MODULATION_BY_SYMBIONT_OF_ENTRY_INTO_HOST	GO_MODULATION_BY_SYMBIONT_OF_ENTRY_INTO_HOST		27	-0.598008	-1.47159	0.0601793	0.563351	1	631	tags=15%, list=5%, signal=16%	HomovsU937	neg
															GO_NEGATIVE_REGULATION_OF_ANIMAL_ORGAN_MORPHOGENESIS	GO_NEGATIVE_REGULATION_OF_ANIMAL_ORGAN_MORPHOGENESIS		14	0.66454	1.59885	0.0573566	0.563445	1	1042	tags=36%, list=8%, signal=39%	HeterovsU937	pos
															GO_MULTI_ORGANISM_CELLULAR_PROCESS	GO_MULTI_ORGANISM_CELLULAR_PROCESS		13	-0.676046	-1.47796	0.0720588	0.563494	1	1604	tags=31%, list=12%, signal=35%	HomovsU937	neg
															GO_ADULT_LOCOMOTORY_BEHAVIOR	GO_ADULT_LOCOMOTORY_BEHAVIOR		41	0.539879	1.59747	0.0365297	0.563687	1	751	tags=15%, list=6%, signal=15%	HeterovsU937	pos
															GO_ACTIN_MEDIATED_CELL_CONTRACTION	GO_ACTIN_MEDIATED_CELL_CONTRACTION		57	0.497029	1.57603	0.0137615	0.56381	1	583	tags=19%, list=4%, signal=20%	HeterovsU937	pos
															GO_ANTIBACTERIAL_HUMORAL_RESPONSE	GO_ANTIBACTERIAL_HUMORAL_RESPONSE		11	-0.707642	-1.47199	0.0655977	0.56401	1	2665	tags=64%, list=20%, signal=79%	HomovsU937	neg
															GO_ESTABLISHMENT_OF_ENDOTHELIAL_BARRIER	GO_ESTABLISHMENT_OF_ENDOTHELIAL_BARRIER		34	-0.578199	-1.48079	0.0422195	0.564298	1	1698	tags=24%, list=13%, signal=27%	HomovsU937	neg
															GO_REGULATION_OF_CATION_TRANSMEMBRANE_TRANSPORT	GO_REGULATION_OF_CATION_TRANSMEMBRANE_TRANSPORT		186	-0.487436	-1.47956	0.0144479	0.564576	1	1601	tags=21%, list=12%, signal=23%	HomovsU937	neg
															GO_DETECTION_OF_EXTERNAL_BIOTIC_STIMULUS	GO_DETECTION_OF_EXTERNAL_BIOTIC_STIMULUS		13	0.657923	1.57837	0.07	0.564637	1	165	tags=15%, list=1%, signal=16%	HeterovsU937	pos
															GO_RHODOPSIN_MEDIATED_SIGNALING_PATHWAY	GO_RHODOPSIN_MEDIATED_SIGNALING_PATHWAY		14	-0.679475	-1.47829	0.0757143	0.564748	1	355	tags=21%, list=3%, signal=22%	HomovsU937	neg
															GO_POSITIVE_REGULATION_OF_AMINO_ACID_TRANSPORT	GO_POSITIVE_REGULATION_OF_AMINO_ACID_TRANSPORT		10	-0.750285	-1.4754	0.0666667	0.565246	1	1376	tags=20%, list=10%, signal=22%	HomovsHetero	neg
															GO_REGULATION_OF_CARDIAC_MUSCLE_CONTRACTION_BY_REGULATION_OF_THE_RELEASE_OF_SEQUESTERED_CALCIUM_ION	GO_REGULATION_OF_CARDIAC_MUSCLE_CONTRACTION_BY_REGULATION_OF_THE_RELEASE_OF_SEQUESTERED_CALCIUM_ION		12	-0.699321	-1.47226	0.0616541	0.565485	1	826	tags=25%, list=6%, signal=27%	HomovsU937	neg
															GO_REGULATION_OF_MICROGLIAL_CELL_ACTIVATION	GO_REGULATION_OF_MICROGLIAL_CELL_ACTIVATION		12	-0.730566	-1.47642	0.0722543	0.565625	1	1347	tags=42%, list=10%, signal=46%	HomovsHetero	neg
															GO_REGULATION_OF_EPITHELIAL_CELL_DIFFERENTIATION	GO_REGULATION_OF_EPITHELIAL_CELL_DIFFERENTIATION		80	0.469345	1.57681	0.0119332	0.565749	1	668	tags=13%, list=5%, signal=13%	HeterovsU937	pos
															GO_MONOCYTE_CHEMOTAXIS	GO_MONOCYTE_CHEMOTAXIS		19	-0.640518	-1.48107	0.0595399	0.565786	1	1471	tags=37%, list=11%, signal=41%	HomovsU937	neg
															GO_REGULATION_OF_ACTIN_FILAMENT_BASED_MOVEMENT	GO_REGULATION_OF_ACTIN_FILAMENT_BASED_MOVEMENT		23	-0.65114	-1.47474	0.0484293	0.565947	1	1207	tags=39%, list=9%, signal=43%	HomovsHetero	neg
															GO_ENDOTHELIUM_DEVELOPMENT	GO_ENDOTHELIUM_DEVELOPMENT		72	-0.411681	-1.32585	0.0892256	0.566169	1	1498	tags=25%, list=11%, signal=28%	HeterovsU937	neg
															GO_OUTFLOW_TRACT_SEPTUM_MORPHOGENESIS	GO_OUTFLOW_TRACT_SEPTUM_MORPHOGENESIS		16	-0.651768	-1.47855	0.072238	0.56631	1	615	tags=19%, list=5%, signal=20%	HomovsU937	neg
															GO_POSITIVE_REGULATION_OF_BLOOD_CIRCULATION	GO_POSITIVE_REGULATION_OF_BLOOD_CIRCULATION		33	-0.588665	-1.47971	0.0426829	0.566669	1	1213	tags=24%, list=9%, signal=27%	HomovsU937	neg
															GO_TUBE_FORMATION	GO_TUBE_FORMATION		102	0.44904	1.58045	0.00787402	0.566738	1	3213	tags=40%, list=24%, signal=52%	HeterovsU937	pos
															GO_PROTEIN_CONTAINING_COMPLEX_REMODELING	GO_PROTEIN_CONTAINING_COMPLEX_REMODELING		12	-0.585683	-1.32522	0.164049	0.566763	1	1712	tags=33%, list=13%, signal=38%	HeterovsU937	neg
															GO_POTASSIUM_ION_TRANSPORT	GO_POTASSIUM_ION_TRANSPORT		104	-0.544072	-1.47339	0.0104932	0.567337	1	1478	tags=22%, list=11%, signal=25%	HomovsHetero	neg
															GO_AMINO_ACID_IMPORT	GO_AMINO_ACID_IMPORT		23	-0.508397	-1.32448	0.138436	0.567581	1	3154	tags=43%, list=23%, signal=57%	HeterovsU937	neg
															GO_ADRENAL_GLAND_DEVELOPMENT	GO_ADRENAL_GLAND_DEVELOPMENT		11	-0.741034	-1.47653	0.0513595	0.56795	1	600	tags=27%, list=4%, signal=29%	HomovsHetero	neg
															GO_CHROMOSOME_LOCALIZATION	GO_CHROMOSOME_LOCALIZATION		60	0.487549	1.57883	0.015544	0.567951	1	3183	tags=40%, list=23%, signal=52%	HeterovsU937	pos
															GO_POSITIVE_REGULATION_OF_BLOOD_PRESSURE	GO_POSITIVE_REGULATION_OF_BLOOD_PRESSURE		13	-0.704438	-1.4738	0.065123	0.567997	1	123	tags=15%, list=1%, signal=16%	HomovsHetero	neg
															GO_BIOMINERALIZATION	GO_BIOMINERALIZATION		80	-0.552686	-1.47262	0.0234292	0.568501	1	1419	tags=23%, list=10%, signal=25%	HomovsHetero	neg
															GO_COCHLEA_MORPHOGENESIS	GO_COCHLEA_MORPHOGENESIS		11	0.719905	1.5989	0.0456621	0.568507	1	400	tags=18%, list=3%, signal=19%	HeterovsU937	pos
															GO_GLUTAMINE_METABOLIC_PROCESS	GO_GLUTAMINE_METABOLIC_PROCESS		16	0.647998	1.58652	0.0679612	0.568787	1	23	tags=6%, list=0%, signal=6%	HeterovsU937	pos
															GO_RESPIRATORY_ELECTRON_TRANSPORT_CHAIN	GO_RESPIRATORY_ELECTRON_TRANSPORT_CHAIN		92	-0.543941	-1.46141	0.0128894	0.568956	1	2954	tags=33%, list=22%, signal=41%	HomovsHetero	neg
															GO_ALDEHYDE_BIOSYNTHETIC_PROCESS	GO_ALDEHYDE_BIOSYNTHETIC_PROCESS		10	0.702884	1.58768	0.0556901	0.569093	1	595	tags=20%, list=4%, signal=21%	HeterovsU937	pos
															GO_LYMPHOID_PROGENITOR_CELL_DIFFERENTIATION	GO_LYMPHOID_PROGENITOR_CELL_DIFFERENTIATION		13	0.655676	1.59192	0.0640394	0.569351	1	2123	tags=46%, list=16%, signal=55%	HeterovsU937	pos
															GO_CELLULAR_RESPONSE_TO_ARSENIC_CONTAINING_SUBSTANCE	GO_CELLULAR_RESPONSE_TO_ARSENIC_CONTAINING_SUBSTANCE		18	-0.675952	-1.47076	0.0580111	0.569485	1	14	tags=6%, list=0%, signal=6%	HomovsHetero	neg
															GO_REGULATION_OF_EXIT_FROM_MITOSIS	GO_REGULATION_OF_EXIT_FROM_MITOSIS		14	0.68177	1.65436	0.0215827	0.569852	1	1983	tags=43%, list=15%, signal=50%	HeterovsU937	pos
															GO_NAD_METABOLIC_PROCESS	GO_NAD_METABOLIC_PROCESS		36	-0.610601	-1.46068	0.0473815	0.570124	1	888	tags=17%, list=7%, signal=18%	HomovsHetero	neg
															GO_POSITIVE_REGULATION_OF_VASCULAR_ASSOCIATED_SMOOTH_MUSCLE_CELL_MIGRATION	GO_POSITIVE_REGULATION_OF_VASCULAR_ASSOCIATED_SMOOTH_MUSCLE_CELL_MIGRATION		10	-0.746746	-1.47117	0.0619469	0.570141	1	286	tags=20%, list=2%, signal=20%	HomovsHetero	neg
															GO_CELL_CELL_ADHESION_VIA_PLASMA_MEMBRANE_ADHESION_MOLECULES	GO_CELL_CELL_ADHESION_VIA_PLASMA_MEMBRANE_ADHESION_MOLECULES		85	-0.519484	-1.46732	0.0197368	0.570271	1	1149	tags=24%, list=8%, signal=26%	HomovsU937	neg
															GO_ACTIN_FILAMENT_BASED_MOVEMENT	GO_ACTIN_FILAMENT_BASED_MOVEMENT		78	0.47026	1.58081	0.00797872	0.570274	1	583	tags=15%, list=4%, signal=16%	HeterovsU937	pos
															GO_ENDODERM_DEVELOPMENT	GO_ENDODERM_DEVELOPMENT		47	-0.586279	-1.46153	0.0337209	0.570822	1	1741	tags=32%, list=13%, signal=36%	HomovsHetero	neg
															GO_LONG_CHAIN_FATTY_ACID_TRANSPORT	GO_LONG_CHAIN_FATTY_ACID_TRANSPORT		46	-0.44415	-1.32159	0.119205	0.570926	1	2748	tags=37%, list=20%, signal=46%	HeterovsU937	neg
															GO_REGULATION_OF_COAGULATION	GO_REGULATION_OF_COAGULATION		45	-0.606719	-1.47151	0.0348028	0.57113	1	1257	tags=27%, list=9%, signal=29%	HomovsHetero	neg
															GO_PROTEIN_DEPOLYMERIZATION	GO_PROTEIN_DEPOLYMERIZATION		84	-0.546363	-1.46725	0.0237838	0.571152	1	1413	tags=17%, list=10%, signal=18%	HomovsHetero	neg
															GO_REGULATION_OF_CALCIUM_ION_DEPENDENT_EXOCYTOSIS	GO_REGULATION_OF_CALCIUM_ION_DEPENDENT_EXOCYTOSIS		26	0.563313	1.58187	0.0327103	0.571154	1	733	tags=23%, list=5%, signal=24%	HeterovsU937	pos
															GO_MICROTUBULE_POLYMERIZATION	GO_MICROTUBULE_POLYMERIZATION		58	0.506874	1.61017	0.025	0.571431	1	2752	tags=38%, list=20%, signal=47%	HeterovsU937	pos
															GO_MESONEPHROS_DEVELOPMENT	GO_MESONEPHROS_DEVELOPMENT		50	0.507561	1.59412	0.026178	0.57152	1	1042	tags=26%, list=8%, signal=28%	HeterovsU937	pos
															GO_REGULATION_OF_CARDIAC_MUSCLE_CELL_ACTION_POTENTIAL	GO_REGULATION_OF_CARDIAC_MUSCLE_CELL_ACTION_POTENTIAL		17	-0.641587	-1.46593	0.075	0.571603	1	2482	tags=65%, list=18%, signal=79%	HomovsU937	neg
															GO_POSITIVE_REGULATION_OF_TRANSPORTER_ACTIVITY	GO_POSITIVE_REGULATION_OF_TRANSPORTER_ACTIVITY		62	-0.425715	-1.32172	0.104452	0.571868	1	1431	tags=21%, list=11%, signal=23%	HeterovsU937	neg
															GO_DOPAMINE_METABOLIC_PROCESS	GO_DOPAMINE_METABOLIC_PROCESS		15	0.659939	1.58431	0.046683	0.571886	1	633	tags=20%, list=5%, signal=21%	HeterovsU937	pos
															GO_MORPHOGENESIS_OF_AN_EPITHELIAL_FOLD	GO_MORPHOGENESIS_OF_AN_EPITHELIAL_FOLD		11	-0.703511	-1.46752	0.0715373	0.571967	1	191	tags=18%, list=1%, signal=18%	HomovsU937	neg
															GO_REGULATION_OF_MICROVILLUS_ORGANIZATION	GO_REGULATION_OF_MICROVILLUS_ORGANIZATION		12	0.668099	1.58824	0.0494118	0.572048	1	1294	tags=42%, list=10%, signal=46%	HeterovsU937	pos
															GO_PHENOL_CONTAINING_COMPOUND_BIOSYNTHETIC_PROCESS	GO_PHENOL_CONTAINING_COMPOUND_BIOSYNTHETIC_PROCESS		18	-0.65435	-1.46637	0.0567376	0.572099	1	2610	tags=44%, list=19%, signal=55%	HomovsU937	neg
															GO_PROTEIN_LIPID_COMPLEX_SUBUNIT_ORGANIZATION	GO_PROTEIN_LIPID_COMPLEX_SUBUNIT_ORGANIZATION		27	-0.616578	-1.46177	0.0477987	0.572202	1	2419	tags=37%, list=18%, signal=45%	HomovsHetero	neg
															GO_C21_STEROID_HORMONE_BIOSYNTHETIC_PROCESS	GO_C21_STEROID_HORMONE_BIOSYNTHETIC_PROCESS		17	0.626239	1.58279	0.0430622	0.572636	1	883	tags=35%, list=7%, signal=38%	HeterovsU937	pos
															GO_NEGATIVE_REGULATION_OF_NUCLEAR_DIVISION	GO_NEGATIVE_REGULATION_OF_NUCLEAR_DIVISION		44	0.541988	1.65564	0.0149626	0.572762	1	3333	tags=45%, list=25%, signal=60%	HeterovsU937	pos
															GO_MAMMARY_GLAND_DEVELOPMENT	GO_MAMMARY_GLAND_DEVELOPMENT		82	-0.54835	-1.46215	0.0229008	0.572768	1	1494	tags=20%, list=11%, signal=22%	HomovsHetero	neg
															GO_DNA_DEALKYLATION	GO_DNA_DEALKYLATION		23	0.590135	1.59918	0.0502392	0.572958	1	2841	tags=48%, list=21%, signal=60%	HeterovsU937	pos
															GO_POSITIVE_REGULATION_OF_OSTEOCLAST_DIFFERENTIATION	GO_POSITIVE_REGULATION_OF_OSTEOCLAST_DIFFERENTIATION		13	-0.583375	-1.32178	0.158845	0.572965	1	2497	tags=46%, list=18%, signal=56%	HeterovsU937	neg
															GO_LIVER_MORPHOGENESIS	GO_LIVER_MORPHOGENESIS		14	-0.702289	-1.46742	0.0725462	0.573024	1	169	tags=14%, list=1%, signal=14%	HomovsHetero	neg
															GO_REGULATION_OF_CATION_CHANNEL_ACTIVITY	GO_REGULATION_OF_CATION_CHANNEL_ACTIVITY		93	-0.543399	-1.45908	0.0150376	0.573131	1	1853	tags=27%, list=14%, signal=31%	HomovsHetero	neg
															GO_NEGATIVE_REGULATION_OF_OXIDATIVE_STRESS_INDUCED_INTRINSIC_APOPTOTIC_SIGNALING_PATHWAY	GO_NEGATIVE_REGULATION_OF_OXIDATIVE_STRESS_INDUCED_INTRINSIC_APOPTOTIC_SIGNALING_PATHWAY		15	0.661943	1.58935	0.0452261	0.573233	1	887	tags=20%, list=7%, signal=21%	HeterovsU937	pos
															GO_REGULATION_OF_KIDNEY_DEVELOPMENT	GO_REGULATION_OF_KIDNEY_DEVELOPMENT		24	0.602359	1.61261	0.0375587	0.57345	1	595	tags=29%, list=4%, signal=30%	HeterovsU937	pos
															GO_POSITIVE_REGULATION_OF_SMOOTH_MUSCLE_CELL_MIGRATION	GO_POSITIVE_REGULATION_OF_SMOOTH_MUSCLE_CELL_MIGRATION		19	-0.517866	-1.32201	0.163763	0.573541	1	1211	tags=37%, list=9%, signal=40%	HeterovsU937	neg
															GO_NEGATIVE_REGULATION_OF_CARTILAGE_DEVELOPMENT	GO_NEGATIVE_REGULATION_OF_CARTILAGE_DEVELOPMENT		13	-0.682109	-1.46884	0.0739645	0.57355	1	585	tags=15%, list=4%, signal=16%	HomovsU937	neg
															GO_MITOCHONDRION_MORPHOGENESIS	GO_MITOCHONDRION_MORPHOGENESIS		20	-0.521771	-1.31971	0.136594	0.573703	1	1681	tags=20%, list=12%, signal=23%	HeterovsU937	neg
															GO_DETECTION_OF_BIOTIC_STIMULUS	GO_DETECTION_OF_BIOTIC_STIMULUS		20	-0.660669	-1.45942	0.0731707	0.573871	1	818	tags=25%, list=6%, signal=27%	HomovsHetero	neg
															GO_NEURON_CELL_CELL_ADHESION	GO_NEURON_CELL_CELL_ADHESION		10	-0.771752	-1.46774	0.0594354	0.573952	1	795	tags=20%, list=6%, signal=21%	HomovsHetero	neg
															GO_CLATHRIN_COAT_ASSEMBLY	GO_CLATHRIN_COAT_ASSEMBLY		14	-0.555795	-1.32005	0.139683	0.574003	1	2189	tags=36%, list=16%, signal=43%	HeterovsU937	neg
															GO_NEGATIVE_REGULATION_OF_CHONDROCYTE_DIFFERENTIATION	GO_NEGATIVE_REGULATION_OF_CHONDROCYTE_DIFFERENTIATION		10	-0.725998	-1.46606	0.0866261	0.574017	1	392	tags=20%, list=3%, signal=21%	HomovsHetero	neg
															GO_NEURAL_NUCLEUS_DEVELOPMENT	GO_NEURAL_NUCLEUS_DEVELOPMENT		39	0.534124	1.59202	0.0232558	0.574228	1	1042	tags=13%, list=8%, signal=14%	HeterovsU937	pos
															GO_NEGATIVE_REGULATION_OF_EPITHELIAL_CELL_MIGRATION	GO_NEGATIVE_REGULATION_OF_EPITHELIAL_CELL_MIGRATION		43	-0.563337	-1.46756	0.0384615	0.574333	1	112	tags=9%, list=1%, signal=9%	HomovsU937	neg
															GO_REGULATION_OF_ENDOTHELIAL_CELL_MIGRATION	GO_REGULATION_OF_ENDOTHELIAL_CELL_MIGRATION		100	-0.545469	-1.46927	0.0129171	0.574379	1	1516	tags=18%, list=11%, signal=20%	HomovsHetero	neg
															GO_REGULATION_OF_EXTRACELLULAR_MATRIX_ASSEMBLY	GO_REGULATION_OF_EXTRACELLULAR_MATRIX_ASSEMBLY		11	-0.718009	-1.46283	0.0897059	0.574496	1	899	tags=36%, list=7%, signal=39%	HomovsHetero	neg
															GO_PIGMENT_GRANULE_LOCALIZATION	GO_PIGMENT_GRANULE_LOCALIZATION		18	-0.52419	-1.31799	0.146087	0.574862	1	1966	tags=33%, list=14%, signal=39%	HeterovsU937	neg
															GO_RECEPTOR_RECYCLING	GO_RECEPTOR_RECYCLING		23	-0.644924	-1.46862	0.0640523	0.574865	1	5	tags=4%, list=0%, signal=4%	HomovsHetero	neg
															GO_NITRIC_OXIDE_MEDIATED_SIGNAL_TRANSDUCTION	GO_NITRIC_OXIDE_MEDIATED_SIGNAL_TRANSDUCTION		11	-0.700017	-1.46795	0.095679	0.575089	1	2168	tags=64%, list=16%, signal=76%	HomovsU937	neg
															GO_MATURE_B_CELL_DIFFERENTIATION	GO_MATURE_B_CELL_DIFFERENTIATION		20	-0.655743	-1.46218	0.0616438	0.57516	1	672	tags=25%, list=5%, signal=26%	HomovsHetero	neg
															GO_POTASSIUM_ION_IMPORT_ACROSS_PLASMA_MEMBRANE	GO_POTASSIUM_ION_IMPORT_ACROSS_PLASMA_MEMBRANE		23	0.621152	1.61073	0.0427136	0.575165	1	304	tags=13%, list=2%, signal=13%	HeterovsU937	pos
															GO_PEPTIDE_CATABOLIC_PROCESS	GO_PEPTIDE_CATABOLIC_PROCESS		17	-0.54599	-1.31655	0.146758	0.575274	1	1724	tags=29%, list=13%, signal=34%	HeterovsU937	neg
															GO_POSITIVE_REGULATION_OF_AMINO_ACID_TRANSPORT	GO_POSITIVE_REGULATION_OF_AMINO_ACID_TRANSPORT		10	-0.713847	-1.46452	0.0748503	0.57541	1	2342	tags=50%, list=17%, signal=60%	HomovsU937	neg
															GO_POSITIVE_REGULATION_OF_DEVELOPMENTAL_GROWTH	GO_POSITIVE_REGULATION_OF_DEVELOPMENTAL_GROWTH		104	0.449294	1.59994	0.00273973	0.575564	1	840	tags=12%, list=6%, signal=12%	HeterovsU937	pos
															GO_REGULATION_OF_NMDA_RECEPTOR_ACTIVITY	GO_REGULATION_OF_NMDA_RECEPTOR_ACTIVITY		22	-0.649832	-1.4679	0.0564304	0.575764	1	555	tags=32%, list=4%, signal=33%	HomovsHetero	neg
															GO_ACTIVATION_OF_PROTEIN_KINASE_B_ACTIVITY	GO_ACTIVATION_OF_PROTEIN_KINASE_B_ACTIVITY		20	-0.52273	-1.31802	0.165574	0.57604	1	1431	tags=25%, list=11%, signal=28%	HeterovsU937	neg
															GO_PROTEIN_PALMITOYLATION	GO_PROTEIN_PALMITOYLATION		29	-0.618267	-1.46353	0.044757	0.576225	1	986	tags=14%, list=7%, signal=15%	HomovsHetero	neg
															GO_LYMPH_VESSEL_MORPHOGENESIS	GO_LYMPH_VESSEL_MORPHOGENESIS		11	-0.573825	-1.31663	0.147569	0.57633	1	2720	tags=36%, list=20%, signal=45%	HeterovsU937	neg
															GO_RESPONSE_TO_ETHANOL	GO_RESPONSE_TO_ETHANOL		68	-0.557694	-1.46294	0.0214689	0.576541	1	2013	tags=22%, list=15%, signal=26%	HomovsHetero	neg
															GO_ALPHA_BETA_T_CELL_DIFFERENTIATION	GO_ALPHA_BETA_T_CELL_DIFFERENTIATION		63	-0.420071	-1.31695	0.0991735	0.576693	1	1044	tags=16%, list=8%, signal=17%	HeterovsU937	neg
															GO_EPITHELIAL_CELL_MORPHOGENESIS	GO_EPITHELIAL_CELL_MORPHOGENESIS		22	-0.510959	-1.31821	0.129353	0.576812	1	2418	tags=36%, list=18%, signal=44%	HeterovsU937	neg
															GO_PYRIMIDINE_RIBONUCLEOSIDE_TRIPHOSPHATE_METABOLIC_PROCESS	GO_PYRIMIDINE_RIBONUCLEOSIDE_TRIPHOSPHATE_METABOLIC_PROCESS	Details ...	12	0.670847	1.7314	0.0152439	0.577398	1	12	tags=8%, list=0%, signal=8%	HomovsU937	pos
															GO_REGULATION_OF_MICROTUBULE_POLYMERIZATION	GO_REGULATION_OF_MICROTUBULE_POLYMERIZATION		36	0.556578	1.65649	0.0341463	0.577554	1	1941	tags=31%, list=14%, signal=36%	HeterovsU937	pos
															GO_REGULATION_OF_MACROPHAGE_CHEMOTAXIS	GO_REGULATION_OF_MACROPHAGE_CHEMOTAXIS		14	-0.702901	-1.46374	0.0824742	0.577807	1	561	tags=21%, list=4%, signal=22%	HomovsHetero	neg
															GO_REGULATION_OF_OXIDOREDUCTASE_ACTIVITY	GO_REGULATION_OF_OXIDOREDUCTASE_ACTIVITY		68	-0.554499	-1.4641	0.0243363	0.578621	1	1254	tags=16%, list=9%, signal=18%	HomovsHetero	neg
															GO_PEPTIDYL_PROLINE_HYDROXYLATION	GO_PEPTIDYL_PROLINE_HYDROXYLATION		11	0.702702	1.61275	0.0475	0.579027	1	216	tags=18%, list=2%, signal=18%	HeterovsU937	pos
															GO_RIBONUCLEOSIDE_MONOPHOSPHATE_METABOLIC_PROCESS	GO_RIBONUCLEOSIDE_MONOPHOSPHATE_METABOLIC_PROCESS		42	-0.452202	-1.3108	0.117547	0.579095	1	1259	tags=19%, list=9%, signal=21%	HeterovsU937	neg
															GO_GLOMERULAR_EPITHELIAL_CELL_DIFFERENTIATION	GO_GLOMERULAR_EPITHELIAL_CELL_DIFFERENTIATION		10	-0.744956	-1.45429	0.088685	0.579266	1	189	tags=20%, list=1%, signal=20%	HomovsHetero	neg
															GO_NEGATIVE_REGULATION_OF_PEPTIDASE_ACTIVITY	GO_NEGATIVE_REGULATION_OF_PEPTIDASE_ACTIVITY		122	-0.528396	-1.45474	0.0114345	0.579589	1	1402	tags=20%, list=10%, signal=22%	HomovsHetero	neg
															GO_CATECHOLAMINE_SECRETION	GO_CATECHOLAMINE_SECRETION		19	-0.683214	-1.46437	0.0490463	0.579817	1	846	tags=32%, list=6%, signal=34%	HomovsHetero	neg
															GO_VASCULAR_ASSOCIATED_SMOOTH_MUSCLE_CELL_MIGRATION	GO_VASCULAR_ASSOCIATED_SMOOTH_MUSCLE_CELL_MIGRATION		14	-0.555323	-1.31093	0.158813	0.580007	1	1949	tags=43%, list=14%, signal=50%	HeterovsU937	neg
															GO_SUBPALLIUM_DEVELOPMENT	GO_SUBPALLIUM_DEVELOPMENT		15	0.683104	1.65963	0.0311688	0.580164	1	46	tags=13%, list=0%, signal=13%	HeterovsU937	pos
															GO_N_GLYCAN_PROCESSING	GO_N_GLYCAN_PROCESSING	Details ...	13	0.661841	1.7458	0.0283019	0.580628	1	833	tags=31%, list=6%, signal=33%	HomovsU937	pos
															GO_MONOVALENT_INORGANIC_ANION_HOMEOSTASIS	GO_MONOVALENT_INORGANIC_ANION_HOMEOSTASIS		13	-0.577576	-1.31158	0.164452	0.580663	1	2055	tags=46%, list=15%, signal=54%	HeterovsU937	neg
															GO_NEURON_FATE_COMMITMENT	GO_NEURON_FATE_COMMITMENT		23	-0.655588	-1.45699	0.0518135	0.580698	1	616	tags=26%, list=5%, signal=27%	HomovsHetero	neg
															GO_PEPTIDYL_CYSTEINE_MODIFICATION	GO_PEPTIDYL_CYSTEINE_MODIFICATION		36	-0.598532	-1.45497	0.0431035	0.580951	1	742	tags=11%, list=5%, signal=12%	HomovsHetero	neg
															GO_EAR_DEVELOPMENT	GO_EAR_DEVELOPMENT		105	-0.531122	-1.45343	0.0198953	0.580977	1	1271	tags=21%, list=9%, signal=23%	HomovsHetero	neg
															GO_RESPONSE_TO_CATECHOLAMINE	GO_RESPONSE_TO_CATECHOLAMINE		50	-0.441289	-1.31103	0.113636	0.581005	1	1099	tags=16%, list=8%, signal=17%	HeterovsU937	neg
															GO_REGULATION_OF_HEART_RATE_BY_CARDIAC_CONDUCTION	GO_REGULATION_OF_HEART_RATE_BY_CARDIAC_CONDUCTION		18	0.630081	1.59997	0.0462287	0.581026	1	583	tags=22%, list=4%, signal=23%	HeterovsU937	pos
															GO_POSITIVE_REGULATION_OF_EPITHELIAL_CELL_DIFFERENTIATION	GO_POSITIVE_REGULATION_OF_EPITHELIAL_CELL_DIFFERENTIATION		30	-0.620767	-1.45527	0.0557533	0.581893	1	1309	tags=23%, list=10%, signal=26%	HomovsHetero	neg
															GO_TYPE_2_IMMUNE_RESPONSE	GO_TYPE_2_IMMUNE_RESPONSE		24	-0.496983	-1.31158	0.149228	0.581931	1	2203	tags=38%, list=16%, signal=45%	HeterovsU937	neg
															GO_PHOSPHATIDYLCHOLINE_BIOSYNTHETIC_PROCESS	GO_PHOSPHATIDYLCHOLINE_BIOSYNTHETIC_PROCESS		30	-0.475188	-1.31202	0.149733	0.581977	1	2617	tags=37%, list=19%, signal=45%	HeterovsU937	neg
															GO_REGULATION_OF_NATURAL_KILLER_CELL_ACTIVATION	GO_REGULATION_OF_NATURAL_KILLER_CELL_ACTIVATION	Details ...	19	0.664234	1.84838	0.003861	0.582161	0.939	614	tags=26%, list=5%, signal=28%	HomovsHetero	pos
															GO_POSITIVE_REGULATION_OF_ADAPTIVE_IMMUNE_RESPONSE	GO_POSITIVE_REGULATION_OF_ADAPTIVE_IMMUNE_RESPONSE		72	-0.406943	-1.31327	0.0906149	0.582165	1	1310	tags=22%, list=10%, signal=24%	HeterovsU937	neg
															GO_IONOTROPIC_GLUTAMATE_RECEPTOR_SIGNALING_PATHWAY	GO_IONOTROPIC_GLUTAMATE_RECEPTOR_SIGNALING_PATHWAY		14	-0.657282	-1.46189	0.0911602	0.582261	1	1594	tags=36%, list=12%, signal=40%	HomovsU937	neg
															GO_POSITIVE_REGULATION_OF_ORGANIC_ACID_TRANSPORT	GO_POSITIVE_REGULATION_OF_ORGANIC_ACID_TRANSPORT		19	-0.532807	-1.31234	0.127208	0.582318	1	2492	tags=42%, list=18%, signal=51%	HeterovsU937	neg
															GO_REGULATION_OF_PEPTIDYL_TYROSINE_PHOSPHORYLATION	GO_REGULATION_OF_PEPTIDYL_TYROSINE_PHOSPHORYLATION		142	-0.371894	-1.31276	0.0662558	0.582379	1	1404	tags=22%, list=10%, signal=24%	HeterovsU937	neg
															GO_O_GLYCAN_PROCESSING	GO_O_GLYCAN_PROCESSING		31	-0.478244	-1.30923	0.150729	0.582466	1	1801	tags=23%, list=13%, signal=26%	HeterovsU937	neg
															GO_EPIDERMIS_MORPHOGENESIS	GO_EPIDERMIS_MORPHOGENESIS		13	-0.709993	-1.45562	0.0733533	0.582696	1	522	tags=23%, list=4%, signal=24%	HomovsHetero	neg
															GO_POSITIVE_REGULATION_OF_PROTEIN_DEPOLYMERIZATION	GO_POSITIVE_REGULATION_OF_PROTEIN_DEPOLYMERIZATION		12	0.707627	1.65715	0.027972	0.582892	1	29	tags=8%, list=0%, signal=8%	HeterovsU937	pos
															GO_COLLATERAL_SPROUTING	GO_COLLATERAL_SPROUTING	Details ...	13	0.766075	1.82536	0.00950119	0.58322	0.997	26	tags=8%, list=0%, signal=8%	HeterovsU937	pos
															GO_CELLULAR_RESPONSE_TO_CAMP	GO_CELLULAR_RESPONSE_TO_CAMP		32	-0.464715	-1.30766	0.12234	0.58325	1	2073	tags=28%, list=15%, signal=33%	HeterovsU937	neg
															GO_INORGANIC_ANION_TRANSPORT	GO_INORGANIC_ANION_TRANSPORT		82	-0.400022	-1.31333	0.0981997	0.583272	1	1803	tags=23%, list=13%, signal=27%	HeterovsU937	neg
															GO_MAINTENANCE_OF_SISTER_CHROMATID_COHESION	GO_MAINTENANCE_OF_SISTER_CHROMATID_COHESION		10	-0.601136	-1.3085	0.167845	0.583274	1	2543	tags=40%, list=19%, signal=49%	HeterovsU937	neg
															GO_DNA_DEMETHYLATION	GO_DNA_DEMETHYLATION		18	0.652854	1.61327	0.0406699	0.583426	1	2841	tags=61%, list=21%, signal=77%	HeterovsU937	pos
															GO_PEPTIDE_CROSS_LINKING	GO_PEPTIDE_CROSS_LINKING		10	-0.711338	-1.46214	0.0782209	0.583654	1	1380	tags=40%, list=10%, signal=44%	HomovsU937	neg
															GO_ETHANOL_METABOLIC_PROCESS	GO_ETHANOL_METABOLIC_PROCESS		10	-0.593601	-1.30787	0.17094	0.583891	1	942	tags=30%, list=7%, signal=32%	HeterovsU937	neg
															GO_ENDOPLASMIC_RETICULUM_ORGANIZATION	GO_ENDOPLASMIC_RETICULUM_ORGANIZATION		50	-0.574676	-1.45178	0.0334928	0.584097	1	2153	tags=22%, list=16%, signal=26%	HomovsHetero	neg
															GO_DETECTION_OF_STIMULUS	GO_DETECTION_OF_STIMULUS		130	-0.533378	-1.4558	0.0102775	0.584287	1	2186	tags=25%, list=16%, signal=30%	HomovsHetero	neg
															GO_NEGATIVE_REGULATION_OF_NEUROTRANSMITTER_TRANSPORT	GO_NEGATIVE_REGULATION_OF_NEUROTRANSMITTER_TRANSPORT		10	0.720265	1.60206	0.0449173	0.585109	1	641	tags=20%, list=5%, signal=21%	HeterovsU937	pos
															GO_RESPONSE_TO_COCAINE	GO_RESPONSE_TO_COCAINE		27	-0.617775	-1.452	0.0536398	0.585388	1	1826	tags=26%, list=13%, signal=30%	HomovsHetero	neg
															GO_MITOCHONDRIAL_ELECTRON_TRANSPORT_NADH_TO_UBIQUINONE	GO_MITOCHONDRIAL_ELECTRON_TRANSPORT_NADH_TO_UBIQUINONE		45	-0.545925	-1.46009	0.0380952	0.58552	1	3902	tags=44%, list=29%, signal=62%	HomovsU937	neg
															GO_SENSORY_PERCEPTION_OF_MECHANICAL_STIMULUS	GO_SENSORY_PERCEPTION_OF_MECHANICAL_STIMULUS		80	-0.51116	-1.46061	0.0222717	0.585657	1	754	tags=18%, list=6%, signal=18%	HomovsU937	neg
															GO_CEREBRAL_CORTEX_DEVELOPMENT	GO_CEREBRAL_CORTEX_DEVELOPMENT		76	0.470336	1.60027	0.0101523	0.585706	1	1718	tags=18%, list=13%, signal=21%	HeterovsU937	pos
															GO_MEIOTIC_CELL_CYCLE_PROCESS	GO_MEIOTIC_CELL_CYCLE_PROCESS		121	0.429514	1.56383	0.00797872	0.585857	1	3281	tags=44%, list=24%, signal=57%	HeterovsU937	pos
															GO_REGULATION_OF_VASCULAR_PERMEABILITY	GO_REGULATION_OF_VASCULAR_PERMEABILITY		24	0.587877	1.56252	0.0364078	0.586075	1	482	tags=21%, list=4%, signal=22%	HeterovsU937	pos
															GO_POSITIVE_REGULATION_OF_ACTIN_FILAMENT_DEPOLYMERIZATION	GO_POSITIVE_REGULATION_OF_ACTIN_FILAMENT_DEPOLYMERIZATION		10	0.725149	1.60299	0.0472813	0.587151	1	29	tags=10%, list=0%, signal=10%	HeterovsU937	pos
															GO_FATTY_ACID_ELONGATION	GO_FATTY_ACID_ELONGATION		10	-0.593398	-1.30597	0.176976	0.58717	1	4588	tags=80%, list=34%, signal=121%	HeterovsU937	neg
															GO_NEGATIVE_REGULATION_OF_POTASSIUM_ION_TRANSPORT	GO_NEGATIVE_REGULATION_OF_POTASSIUM_ION_TRANSPORT		18	0.663689	1.65995	0.037037	0.58744	1	487	tags=22%, list=4%, signal=23%	HeterovsU937	pos
															GO_LEARNING	GO_LEARNING		98	0.452099	1.61355	0.010989	0.588573	1	314	tags=6%, list=2%, signal=6%	HeterovsU937	pos
															GO_POSITIVE_REGULATION_OF_ERBB_SIGNALING_PATHWAY	GO_POSITIVE_REGULATION_OF_ERBB_SIGNALING_PATHWAY		24	-0.494644	-1.30367	0.149915	0.588636	1	1336	tags=25%, list=10%, signal=28%	HeterovsU937	neg
															GO_POSTSYNAPSE_ASSEMBLY	GO_POSTSYNAPSE_ASSEMBLY	Details ...	15	-0.845373	-1.79528	0	0.277721	0.711	795	tags=40%, list=6%, signal=42%	HomovsHetero	neg
															GO_RESPONSE_TO_CADMIUM_ION	GO_RESPONSE_TO_CADMIUM_ION		46	0.531844	1.60404	0.0224439	0.588943	1	1893	tags=26%, list=14%, signal=30%	HeterovsU937	pos
															GO_BODY_MORPHOGENESIS	GO_BODY_MORPHOGENESIS		29	0.590078	1.66165	0.0188679	0.589222	1	698	tags=21%, list=5%, signal=22%	HeterovsU937	pos
															GO_NEGATIVE_REGULATION_OF_CALCIUM_MEDIATED_SIGNALING	GO_NEGATIVE_REGULATION_OF_CALCIUM_MEDIATED_SIGNALING		21	-0.503474	-1.30382	0.166389	0.58941	1	1177	tags=24%, list=9%, signal=26%	HeterovsU937	neg
															GO_REGULATION_OF_COLLAGEN_METABOLIC_PROCESS	GO_REGULATION_OF_COLLAGEN_METABOLIC_PROCESS		23	-0.640575	-1.44961	0.0693717	0.589931	1	1764	tags=30%, list=13%, signal=35%	HomovsHetero	neg
															GO_POSITIVE_REGULATION_OF_PROTEIN_AUTOPHOSPHORYLATION	GO_POSITIVE_REGULATION_OF_PROTEIN_AUTOPHOSPHORYLATION		18	-0.530777	-1.30273	0.167797	0.590104	1	1317	tags=33%, list=10%, signal=37%	HeterovsU937	neg
															GO_POSITIVE_REGULATION_OF_ANION_TRANSPORT	GO_POSITIVE_REGULATION_OF_ANION_TRANSPORT		28	-0.485617	-1.30383	0.158163	0.590643	1	2492	tags=36%, list=18%, signal=44%	HeterovsU937	neg
															GO_GLOMERULAR_EPITHELIUM_DEVELOPMENT	GO_GLOMERULAR_EPITHELIUM_DEVELOPMENT		12	-0.67875	-1.45839	0.0769231	0.590866	1	241	tags=17%, list=2%, signal=17%	HomovsU937	neg
															GO_EMBRYONIC_APPENDAGE_MORPHOGENESIS	GO_EMBRYONIC_APPENDAGE_MORPHOGENESIS		68	-0.56159	-1.44885	0.0291807	0.591234	1	1494	tags=18%, list=11%, signal=20%	HomovsHetero	neg
															GO_FOREBRAIN_NEURON_DEVELOPMENT	GO_FOREBRAIN_NEURON_DEVELOPMENT		12	-0.706935	-1.44398	0.083682	0.591418	1	32	tags=17%, list=0%, signal=17%	HomovsHetero	neg
															GO_POSITIVE_REGULATION_OF_PATHWAY_RESTRICTED_SMAD_PROTEIN_PHOSPHORYLATION	GO_POSITIVE_REGULATION_OF_PATHWAY_RESTRICTED_SMAD_PROTEIN_PHOSPHORYLATION		19	-0.647733	-1.44637	0.0714286	0.591509	1	708	tags=21%, list=5%, signal=22%	HomovsHetero	neg
															GO_MYOBLAST_DIFFERENTIATION	GO_MYOBLAST_DIFFERENTIATION		44	-0.449892	-1.30393	0.127695	0.591643	1	2090	tags=27%, list=15%, signal=32%	HeterovsU937	neg
															GO_CAMERA_TYPE_EYE_PHOTORECEPTOR_CELL_DIFFERENTIATION	GO_CAMERA_TYPE_EYE_PHOTORECEPTOR_CELL_DIFFERENTIATION		10	-0.717249	-1.44965	0.082391	0.592132	1	1422	tags=20%, list=10%, signal=22%	HomovsHetero	neg
															GO_CEREBRAL_CORTEX_RADIALLY_ORIENTED_CELL_MIGRATION	GO_CEREBRAL_CORTEX_RADIALLY_ORIENTED_CELL_MIGRATION		21	0.564392	1.48235	0.0857843	0.592231	1	201	tags=10%, list=1%, signal=10%	HeterovsU937	pos
															GO_HEART_VALVE_DEVELOPMENT	GO_HEART_VALVE_DEVELOPMENT		36	-0.602479	-1.44669	0.0478528	0.592257	1	1141	tags=22%, list=8%, signal=24%	HomovsHetero	neg
															GO_CAMERA_TYPE_EYE_MORPHOGENESIS	GO_CAMERA_TYPE_EYE_MORPHOGENESIS		65	-0.555368	-1.44759	0.0256983	0.592581	1	1553	tags=23%, list=11%, signal=26%	HomovsHetero	neg
															GO_REGULATION_OF_SPINDLE_ASSEMBLY	GO_REGULATION_OF_SPINDLE_ASSEMBLY	Details ...	19	0.587571	1.70973	0.019305	0.59299	1	2363	tags=42%, list=17%, signal=51%	HomovsU937	pos
															GO_REGULATION_OF_MORPHOGENESIS_OF_A_BRANCHING_STRUCTURE	GO_REGULATION_OF_MORPHOGENESIS_OF_A_BRANCHING_STRUCTURE		26	-0.634385	-1.44409	0.0525641	0.593178	1	1198	tags=23%, list=9%, signal=25%	HomovsHetero	neg
															GO_REGULATION_OF_HEART_RATE_BY_CARDIAC_CONDUCTION	GO_REGULATION_OF_HEART_RATE_BY_CARDIAC_CONDUCTION		18	-0.668747	-1.44697	0.0759837	0.593243	1	1026	tags=28%, list=8%, signal=30%	HomovsHetero	neg
															GO_REGULATION_OF_AUTOPHAGY_OF_MITOCHONDRION_IN_RESPONSE_TO_MITOCHONDRIAL_DEPOLARIZATION	GO_REGULATION_OF_AUTOPHAGY_OF_MITOCHONDRION_IN_RESPONSE_TO_MITOCHONDRIAL_DEPOLARIZATION		15	0.656277	1.62202	0.0475	0.593476	1	14	tags=7%, list=0%, signal=7%	HeterovsU937	pos
															GO_NEGATIVE_REGULATION_OF_METAPHASE_ANAPHASE_TRANSITION_OF_CELL_CYCLE	GO_NEGATIVE_REGULATION_OF_METAPHASE_ANAPHASE_TRANSITION_OF_CELL_CYCLE		32	0.571498	1.61388	0.0357995	0.593649	1	2939	tags=44%, list=22%, signal=56%	HeterovsU937	pos
															GO_MYOTUBE_DIFFERENTIATION	GO_MYOTUBE_DIFFERENTIATION		60	0.460954	1.48272	0.0336538	0.593997	1	1191	tags=22%, list=9%, signal=24%	HeterovsU937	pos
															GO_REGULATION_OF_HORMONE_METABOLIC_PROCESS	GO_REGULATION_OF_HORMONE_METABOLIC_PROCESS		20	-0.651181	-1.44297	0.0654206	0.594149	1	581	tags=15%, list=4%, signal=16%	HomovsHetero	neg
															GO_REGULATION_OF_MORPHOGENESIS_OF_A_BRANCHING_STRUCTURE	GO_REGULATION_OF_MORPHOGENESIS_OF_A_BRANCHING_STRUCTURE		26	0.5899	1.62367	0.0250627	0.594267	1	541	tags=19%, list=4%, signal=20%	HeterovsU937	pos
															GO_STRIATUM_DEVELOPMENT	GO_STRIATUM_DEVELOPMENT		11	-0.735282	-1.44483	0.0631741	0.594353	1	560	tags=18%, list=4%, signal=19%	HomovsHetero	neg
															GO_SMOOTHENED_SIGNALING_PATHWAY_INVOLVED_IN_DORSAL_VENTRAL_NEURAL_TUBE_PATTERNING	GO_SMOOTHENED_SIGNALING_PATHWAY_INVOLVED_IN_DORSAL_VENTRAL_NEURAL_TUBE_PATTERNING		14	-0.687305	-1.44759	0.0713287	0.594952	1	2795	tags=43%, list=21%, signal=54%	HomovsHetero	neg
															GO_REGULATION_OF_B_CELL_MEDIATED_IMMUNITY	GO_REGULATION_OF_B_CELL_MEDIATED_IMMUNITY		40	-0.561354	-1.45476	0.0491018	0.594987	1	1876	tags=25%, list=14%, signal=29%	HomovsU937	neg
															GO_EPITHELIAL_CELL_DEVELOPMENT	GO_EPITHELIAL_CELL_DEVELOPMENT		133	-0.523881	-1.44417	0.009375	0.595104	1	478	tags=11%, list=4%, signal=12%	HomovsHetero	neg
															GO_REGULATION_OF_EPIDERMAL_CELL_DIFFERENTIATION	GO_REGULATION_OF_EPIDERMAL_CELL_DIFFERENTIATION	Details ...	30	0.543769	1.73715	0.00854701	0.595244	1	1662	tags=30%, list=12%, signal=34%	HomovsU937	pos
															GO_NEGATIVE_REGULATION_OF_CHROMOSOME_SEGREGATION	GO_NEGATIVE_REGULATION_OF_CHROMOSOME_SEGREGATION		37	0.514846	1.53952	0.0253807	0.595262	1	3167	tags=46%, list=23%, signal=60%	HeterovsU937	pos
															GO_FORMATION_OF_PRIMARY_GERM_LAYER	GO_FORMATION_OF_PRIMARY_GERM_LAYER		68	0.451192	1.49559	0.025	0.595477	1	902	tags=19%, list=7%, signal=20%	HeterovsU937	pos
															GO_TOOTH_MINERALIZATION	GO_TOOTH_MINERALIZATION		11	0.640679	1.48318	0.0843091	0.595608	1	1114	tags=36%, list=8%, signal=40%	HeterovsU937	pos
															GO_REGULATION_OF_SYNAPTIC_VESICLE_ENDOCYTOSIS	GO_REGULATION_OF_SYNAPTIC_VESICLE_ENDOCYTOSIS		15	0.681451	1.61657	0.044226	0.595756	1	641	tags=33%, list=5%, signal=35%	HeterovsU937	pos
															GO_LONG_CHAIN_FATTY_ACYL_COA_METABOLIC_PROCESS	GO_LONG_CHAIN_FATTY_ACYL_COA_METABOLIC_PROCESS		17	-0.541354	-1.30039	0.164049	0.595764	1	3370	tags=47%, list=25%, signal=63%	HeterovsU937	neg
															GO_NEGATIVE_REGULATION_OF_OXIDOREDUCTASE_ACTIVITY	GO_NEGATIVE_REGULATION_OF_OXIDOREDUCTASE_ACTIVITY		15	0.686612	1.63896	0.0439276	0.595843	1	186	tags=13%, list=1%, signal=14%	HeterovsU937	pos
															GO_LEUKOCYTE_CHEMOTAXIS	GO_LEUKOCYTE_CHEMOTAXIS		109	-0.495737	-1.45509	0.0208105	0.59592	1	1471	tags=28%, list=11%, signal=31%	HomovsU937	neg
															GO_POSITIVE_REGULATION_OF_NF_KAPPAB_TRANSCRIPTION_FACTOR_ACTIVITY	GO_POSITIVE_REGULATION_OF_NF_KAPPAB_TRANSCRIPTION_FACTOR_ACTIVITY		111	-0.380571	-1.29988	0.106181	0.595958	1	1765	tags=23%, list=13%, signal=26%	HeterovsU937	neg
															GO_PEPTIDYL_PROLINE_HYDROXYLATION	GO_PEPTIDYL_PROLINE_HYDROXYLATION		11	-0.724653	-1.44495	0.0926194	0.596137	1	1805	tags=45%, list=13%, signal=52%	HomovsHetero	neg
															GO_FIBROBLAST_GROWTH_FACTOR_RECEPTOR_SIGNALING_PATHWAY	GO_FIBROBLAST_GROWTH_FACTOR_RECEPTOR_SIGNALING_PATHWAY		67	-0.554593	-1.44205	0.031355	0.5963	1	266	tags=6%, list=2%, signal=6%	HomovsHetero	neg
															GO_POSITIVE_REGULATION_OF_LEUKOCYTE_MIGRATION	GO_POSITIVE_REGULATION_OF_LEUKOCYTE_MIGRATION		70	-0.406509	-1.29809	0.118761	0.596319	1	1996	tags=29%, list=15%, signal=33%	HeterovsU937	neg
															GO_EMBRYONIC_CAMERA_TYPE_EYE_MORPHOGENESIS	GO_EMBRYONIC_CAMERA_TYPE_EYE_MORPHOGENESIS		11	0.721151	1.61476	0.0409639	0.596611	1	2924	tags=64%, list=22%, signal=81%	HeterovsU937	pos
															GO_POSITIVE_REGULATION_OF_MORPHOGENESIS_OF_AN_EPITHELIUM	GO_POSITIVE_REGULATION_OF_MORPHOGENESIS_OF_AN_EPITHELIUM		16	0.612754	1.49138	0.0810811	0.59675	1	595	tags=25%, list=4%, signal=26%	HeterovsU937	pos
															GO_POSITIVE_REGULATION_OF_ACTIN_CYTOSKELETON_REORGANIZATION	GO_POSITIVE_REGULATION_OF_ACTIN_CYTOSKELETON_REORGANIZATION		14	-0.558282	-1.29873	0.176157	0.596901	1	1211	tags=21%, list=9%, signal=24%	HeterovsU937	neg
															GO_NEGATIVE_REGULATION_OF_RECEPTOR_INTERNALIZATION	GO_NEGATIVE_REGULATION_OF_RECEPTOR_INTERNALIZATION		10	-0.582963	-1.2982	0.173838	0.597267	1	267	tags=20%, list=2%, signal=20%	HeterovsU937	neg
															GO_CHROMOSOME_CONDENSATION	GO_CHROMOSOME_CONDENSATION		24	0.553573	1.48938	0.0771208	0.597276	1	2786	tags=58%, list=21%, signal=73%	HeterovsU937	pos
															GO_MAINTENANCE_OF_BLOOD_BRAIN_BARRIER	GO_MAINTENANCE_OF_BLOOD_BRAIN_BARRIER		20	0.63352	1.63685	0.0348028	0.597319	1	32	tags=10%, list=0%, signal=10%	HeterovsU937	pos
															GO_REGULATION_OF_PROTEIN_POLYUBIQUITINATION	GO_REGULATION_OF_PROTEIN_POLYUBIQUITINATION		19	0.585654	1.48359	0.0873786	0.59734	1	1206	tags=16%, list=9%, signal=17%	HeterovsU937	pos
															GO_SYNAPSE_ASSEMBLY	GO_SYNAPSE_ASSEMBLY		77	0.495364	1.66187	0.00537634	0.597418	1	1091	tags=22%, list=8%, signal=24%	HeterovsU937	pos
															GO_CEREBRAL_CORTEX_NEURON_DIFFERENTIATION	GO_CEREBRAL_CORTEX_NEURON_DIFFERENTIATION		13	0.627073	1.49597	0.107306	0.59746	1	361	tags=23%, list=3%, signal=24%	HeterovsU937	pos
															GO_MODULATION_BY_HOST_OF_VIRAL_GENOME_REPLICATION	GO_MODULATION_BY_HOST_OF_VIRAL_GENOME_REPLICATION		13	0.691091	1.64596	0.0345679	0.597642	1	905	tags=23%, list=7%, signal=25%	HeterovsU937	pos
															GO_RESPIRATORY_BURST_INVOLVED_IN_DEFENSE_RESPONSE	GO_RESPIRATORY_BURST_INVOLVED_IN_DEFENSE_RESPONSE		10	0.691167	1.54975	0.0787589	0.597709	1	1484	tags=30%, list=11%, signal=34%	HeterovsU937	pos
															GO_POSITIVE_REGULATION_OF_VASCULAR_ASSOCIATED_SMOOTH_MUSCLE_CELL_MIGRATION	GO_POSITIVE_REGULATION_OF_VASCULAR_ASSOCIATED_SMOOTH_MUSCLE_CELL_MIGRATION		10	-0.711489	-1.45582	0.0779412	0.597737	1	142	tags=20%, list=1%, signal=20%	HomovsU937	neg
															GO_LIPOPOLYSACCHARIDE_MEDIATED_SIGNALING_PATHWAY	GO_LIPOPOLYSACCHARIDE_MEDIATED_SIGNALING_PATHWAY		40	-0.450971	-1.29885	0.149485	0.597787	1	463	tags=18%, list=3%, signal=18%	HeterovsU937	neg
															GO_REGULATION_OF_LAMELLIPODIUM_ASSEMBLY	GO_REGULATION_OF_LAMELLIPODIUM_ASSEMBLY		23	0.577677	1.53765	0.0750605	0.597923	1	96	tags=9%, list=1%, signal=9%	HeterovsU937	pos
															GO_SMOOTH_MUSCLE_CELL_DIFFERENTIATION	GO_SMOOTH_MUSCLE_CELL_DIFFERENTIATION		35	0.504975	1.44628	0.0892019	0.59793	1	595	tags=20%, list=4%, signal=21%	HeterovsU937	pos
															GO_POSITIVE_REGULATION_OF_TUMOR_NECROSIS_FACTOR_MEDIATED_SIGNALING_PATHWAY	GO_POSITIVE_REGULATION_OF_TUMOR_NECROSIS_FACTOR_MEDIATED_SIGNALING_PATHWAY	Details ...	10	0.717525	1.73145	0.017341	0.597964	1	723	tags=40%, list=5%, signal=42%	HomovsU937	pos
															GO_STEROID_HORMONE_BIOSYNTHETIC_PROCESS	GO_STEROID_HORMONE_BIOSYNTHETIC_PROCESS		27	0.557928	1.49382	0.0628141	0.598138	1	1682	tags=33%, list=12%, signal=38%	HeterovsU937	pos
															GO_SARCOPLASMIC_RETICULUM_CALCIUM_ION_TRANSPORT	GO_SARCOPLASMIC_RETICULUM_CALCIUM_ION_TRANSPORT		19	-0.619068	-1.45514	0.0581081	0.598217	1	1213	tags=21%, list=9%, signal=23%	HomovsU937	neg
															GO_REGULATION_OF_MITOCHONDRIAL_FUSION	GO_REGULATION_OF_MITOCHONDRIAL_FUSION		10	0.699864	1.54107	0.0778589	0.598245	1	14	tags=10%, list=0%, signal=10%	HeterovsU937	pos
															GO_AXIS_SPECIFICATION	GO_AXIS_SPECIFICATION		41	0.516574	1.55082	0.0311751	0.598363	1	874	tags=22%, list=6%, signal=23%	HeterovsU937	pos
															GO_DNA_METHYLATION_OR_DEMETHYLATION	GO_DNA_METHYLATION_OR_DEMETHYLATION		63	0.48044	1.53637	0.0300231	0.598372	1	2841	tags=46%, list=21%, signal=58%	HeterovsU937	pos
															GO_REGULATION_OF_SYSTEMIC_ARTERIAL_BLOOD_PRESSURE_MEDIATED_BY_A_CHEMICAL_SIGNAL	GO_REGULATION_OF_SYSTEMIC_ARTERIAL_BLOOD_PRESSURE_MEDIATED_BY_A_CHEMICAL_SIGNAL		20	-0.619047	-1.45624	0.079561	0.59841	1	3091	tags=60%, list=23%, signal=78%	HomovsU937	neg
															GO_POSITIVE_REGULATION_OF_NEURON_MIGRATION	GO_POSITIVE_REGULATION_OF_NEURON_MIGRATION		15	0.625225	1.49661	0.0882353	0.598552	1	201	tags=13%, list=1%, signal=14%	HeterovsU937	pos
															GO_POSITIVE_REGULATION_OF_AUTOPHAGY_OF_MITOCHONDRION	GO_POSITIVE_REGULATION_OF_AUTOPHAGY_OF_MITOCHONDRION		21	0.593086	1.54827	0.0645161	0.598595	1	14	tags=5%, list=0%, signal=5%	HeterovsU937	pos
															GO_DENDRITE_EXTENSION	GO_DENDRITE_EXTENSION		22	0.592309	1.53973	0.0679612	0.598648	1	487	tags=18%, list=4%, signal=19%	HeterovsU937	pos
															GO_METAPHASE_ANAPHASE_TRANSITION_OF_CELL_CYCLE	GO_METAPHASE_ANAPHASE_TRANSITION_OF_CELL_CYCLE		52	0.457538	1.46562	0.0403023	0.598668	1	2939	tags=38%, list=22%, signal=49%	HeterovsU937	pos
															GO_POTASSIUM_ION_EXPORT_ACROSS_PLASMA_MEMBRANE	GO_POTASSIUM_ION_EXPORT_ACROSS_PLASMA_MEMBRANE		10	0.678024	1.48695	0.112412	0.59896	1	1	tags=10%, list=0%, signal=10%	HeterovsU937	pos
															GO_FOREBRAIN_NEURON_DEVELOPMENT	GO_FOREBRAIN_NEURON_DEVELOPMENT		12	0.628046	1.48602	0.105911	0.598963	1	1774	tags=42%, list=13%, signal=48%	HeterovsU937	pos
															GO_NAD_METABOLIC_PROCESS	GO_NAD_METABOLIC_PROCESS		36	0.514252	1.47912	0.0721393	0.599175	1	474	tags=11%, list=3%, signal=11%	HeterovsU937	pos
															GO_DNA_DOUBLE_STRAND_BREAK_PROCESSING	GO_DNA_DOUBLE_STRAND_BREAK_PROCESSING		19	0.568016	1.48395	0.0874705	0.599188	1	3801	tags=47%, list=28%, signal=66%	HeterovsU937	pos
															GO_MESODERMAL_CELL_DIFFERENTIATION	GO_MESODERMAL_CELL_DIFFERENTIATION		12	0.650205	1.49152	0.113527	0.599369	1	400	tags=25%, list=3%, signal=26%	HeterovsU937	pos
															GO_REGULATION_OF_OLIGODENDROCYTE_DIFFERENTIATION	GO_REGULATION_OF_OLIGODENDROCYTE_DIFFERENTIATION		24	0.553855	1.48482	0.0686499	0.599522	1	536	tags=13%, list=4%, signal=13%	HeterovsU937	pos
															GO_POSITIVE_REGULATION_OF_MITOTIC_NUCLEAR_DIVISION	GO_POSITIVE_REGULATION_OF_MITOTIC_NUCLEAR_DIVISION		40	0.549927	1.61731	0.0301508	0.599579	1	988	tags=25%, list=7%, signal=27%	HeterovsU937	pos
															GO_REGULATION_OF_SMOOTH_MUSCLE_CELL_DIFFERENTIATION	GO_REGULATION_OF_SMOOTH_MUSCLE_CELL_DIFFERENTIATION		22	0.55623	1.44655	0.0889423	0.599609	1	314	tags=18%, list=2%, signal=19%	HeterovsU937	pos
															GO_NEGATIVE_REGULATION_OF_PLATELET_ACTIVATION	GO_NEGATIVE_REGULATION_OF_PLATELET_ACTIVATION		12	-0.564605	-1.29566	0.164623	0.599685	1	1949	tags=42%, list=14%, signal=49%	HeterovsU937	neg
															GO_I_KAPPAB_PHOSPHORYLATION	GO_I_KAPPAB_PHOSPHORYLATION		14	0.623989	1.46439	0.0917874	0.599788	1	201	tags=14%, list=1%, signal=14%	HeterovsU937	pos
															GO_PROTEIN_LOCALIZATION_TO_KINETOCHORE	GO_PROTEIN_LOCALIZATION_TO_KINETOCHORE		17	0.60449	1.49233	0.0774648	0.599827	1	3426	tags=47%, list=25%, signal=63%	HeterovsU937	pos
															GO_RETINA_LAYER_FORMATION	GO_RETINA_LAYER_FORMATION		11	0.673311	1.54416	0.0671141	0.599863	1	38	tags=9%, list=0%, signal=9%	HeterovsU937	pos
															GO_REGULATION_OF_LEUKOCYTE_APOPTOTIC_PROCESS	GO_REGULATION_OF_LEUKOCYTE_APOPTOTIC_PROCESS		56	0.458171	1.4895	0.0422886	0.599962	1	17	tags=4%, list=0%, signal=4%	HeterovsU937	pos
															GO_EXPORT_ACROSS_PLASMA_MEMBRANE	GO_EXPORT_ACROSS_PLASMA_MEMBRANE		34	0.500367	1.46609	0.0821596	0.60005	1	244	tags=9%, list=2%, signal=9%	HeterovsU937	pos
															GO_SARCOMERE_ORGANIZATION	GO_SARCOMERE_ORGANIZATION		17	0.6551	1.6417	0.0263789	0.600079	1	687	tags=18%, list=5%, signal=19%	HeterovsU937	pos
															GO_C21_STEROID_HORMONE_METABOLIC_PROCESS	GO_C21_STEROID_HORMONE_METABOLIC_PROCESS		21	0.582919	1.49711	0.0686275	0.600107	1	883	tags=33%, list=7%, signal=36%	HeterovsU937	pos
															GO_MYOTUBE_CELL_DEVELOPMENT	GO_MYOTUBE_CELL_DEVELOPMENT		18	0.586167	1.48755	0.084507	0.600112	1	1042	tags=22%, list=8%, signal=24%	HeterovsU937	pos
															GO_CELLULAR_BIOGENIC_AMINE_METABOLIC_PROCESS	GO_CELLULAR_BIOGENIC_AMINE_METABOLIC_PROCESS		25	-0.490839	-1.29507	0.168831	0.600171	1	2062	tags=36%, list=15%, signal=42%	HeterovsU937	neg
															GO_POSITIVE_REGULATION_OF_KIDNEY_DEVELOPMENT	GO_POSITIVE_REGULATION_OF_KIDNEY_DEVELOPMENT		19	0.633794	1.62389	0.035461	0.600357	1	595	tags=37%, list=4%, signal=38%	HeterovsU937	pos
															GO_REGULATION_OF_VASOCONSTRICTION	GO_REGULATION_OF_VASOCONSTRICTION		26	-0.626919	-1.43228	0.0597758	0.600429	1	1124	tags=23%, list=8%, signal=25%	HomovsHetero	neg
															GO_KIDNEY_MORPHOGENESIS	GO_KIDNEY_MORPHOGENESIS		43	0.489208	1.47231	0.0551378	0.600522	1	1181	tags=28%, list=9%, signal=30%	HeterovsU937	pos
															GO_NEGATIVE_REGULATION_OF_RELEASE_OF_CYTOCHROME_C_FROM_MITOCHONDRIA	GO_NEGATIVE_REGULATION_OF_RELEASE_OF_CYTOCHROME_C_FROM_MITOCHONDRIA		11	0.659444	1.55132	0.0677966	0.600668	1	736	tags=27%, list=5%, signal=29%	HeterovsU937	pos
															GO_RESPONSE_TO_AUDITORY_STIMULUS	GO_RESPONSE_TO_AUDITORY_STIMULUS		12	0.723079	1.63969	0.0315534	0.60075	1	6	tags=8%, list=0%, signal=8%	HeterovsU937	pos
															GO_POSITIVE_REGULATION_OF_CELL_GROWTH	GO_POSITIVE_REGULATION_OF_CELL_GROWTH		110	0.407297	1.44782	0.0185185	0.600815	1	842	tags=11%, list=6%, signal=12%	HeterovsU937	pos
															GO_RESPONSE_TO_L_GLUTAMATE	GO_RESPONSE_TO_L_GLUTAMATE		10	-0.586294	-1.29613	0.179856	0.600827	1	2445	tags=40%, list=18%, signal=49%	HeterovsU937	neg
															GO_NATURAL_KILLER_CELL_MEDIATED_IMMUNITY	GO_NATURAL_KILLER_CELL_MEDIATED_IMMUNITY		38	-0.45274	-1.29441	0.151316	0.600831	1	1639	tags=18%, list=12%, signal=21%	HeterovsU937	neg
															GO_ALPHA_BETA_T_CELL_ACTIVATION	GO_ALPHA_BETA_T_CELL_ACTIVATION		88	-0.39445	-1.2957	0.0972887	0.600832	1	1940	tags=24%, list=14%, signal=28%	HeterovsU937	neg
															GO_HUMORAL_IMMUNE_RESPONSE	GO_HUMORAL_IMMUNE_RESPONSE		89	-0.388551	-1.29393	0.0927487	0.60097	1	1310	tags=34%, list=10%, signal=37%	HeterovsU937	neg
															GO_MORPHOGENESIS_OF_EMBRYONIC_EPITHELIUM	GO_MORPHOGENESIS_OF_EMBRYONIC_EPITHELIUM		96	-0.525701	-1.43262	0.0245727	0.601046	1	730	tags=11%, list=5%, signal=12%	HomovsHetero	neg
															GO_NEURON_DEATH_IN_RESPONSE_TO_OXIDATIVE_STRESS	GO_NEURON_DEATH_IN_RESPONSE_TO_OXIDATIVE_STRESS		23	0.592202	1.54142	0.0600462	0.601152	1	1376	tags=26%, list=10%, signal=29%	HeterovsU937	pos
															GO_AROMATIC_AMINO_ACID_FAMILY_METABOLIC_PROCESS	GO_AROMATIC_AMINO_ACID_FAMILY_METABOLIC_PROCESS		23	-0.623341	-1.43074	0.0823212	0.601178	1	2053	tags=30%, list=15%, signal=36%	HomovsHetero	neg
															GO_REVERSE_CHOLESTEROL_TRANSPORT	GO_REVERSE_CHOLESTEROL_TRANSPORT		10	-0.736923	-1.43304	0.0938967	0.601222	1	399	tags=30%, list=3%, signal=31%	HomovsHetero	neg
															GO_RESPONSE_TO_MITOCHONDRIAL_DEPOLARISATION	GO_RESPONSE_TO_MITOCHONDRIAL_DEPOLARISATION		20	0.569103	1.46663	0.0958904	0.601248	1	14	tags=5%, list=0%, signal=5%	HeterovsU937	pos
															GO_SISTER_CHROMATID_SEGREGATION	GO_SISTER_CHROMATID_SEGREGATION		159	0.414506	1.54507	0.0115942	0.601293	1	2939	tags=38%, list=22%, signal=48%	HeterovsU937	pos
															GO_REGULATION_OF_OSTEOCLAST_DEVELOPMENT	GO_REGULATION_OF_OSTEOCLAST_DEVELOPMENT		10	-0.589075	-1.29337	0.182906	0.601361	1	1105	tags=40%, list=8%, signal=44%	HeterovsU937	neg
															GO_NEUROINFLAMMATORY_RESPONSE	GO_NEUROINFLAMMATORY_RESPONSE		38	0.492493	1.45008	0.0677966	0.601414	1	959	tags=24%, list=7%, signal=25%	HeterovsU937	pos
															GO_MEMBRANE_REPOLARIZATION	GO_MEMBRANE_REPOLARIZATION		25	-0.61968	-1.42976	0.0783055	0.60145	1	920	tags=20%, list=7%, signal=21%	HomovsHetero	neg
															GO_DNA_STRAND_ELONGATION	GO_DNA_STRAND_ELONGATION		24	0.540713	1.44916	0.0939086	0.601581	1	1757	tags=29%, list=13%, signal=33%	HeterovsU937	pos
															GO_REGULATION_OF_RELEASE_OF_CYTOCHROME_C_FROM_MITOCHONDRIA	GO_REGULATION_OF_RELEASE_OF_CYTOCHROME_C_FROM_MITOCHONDRIA		32	0.568749	1.61857	0.0386473	0.60176	1	2032	tags=31%, list=15%, signal=37%	HeterovsU937	pos
															GO_REGULATION_OF_SPINDLE_ORGANIZATION	GO_REGULATION_OF_SPINDLE_ORGANIZATION		28	0.525172	1.44662	0.0711009	0.601839	1	3584	tags=57%, list=26%, signal=77%	HeterovsU937	pos
															GO_REGULATION_OF_SYSTEMIC_ARTERIAL_BLOOD_PRESSURE_MEDIATED_BY_A_CHEMICAL_SIGNAL	GO_REGULATION_OF_SYSTEMIC_ARTERIAL_BLOOD_PRESSURE_MEDIATED_BY_A_CHEMICAL_SIGNAL		20	-0.506557	-1.29233	0.187826	0.601887	1	2722	tags=40%, list=20%, signal=50%	HeterovsU937	neg
															GO_REGULATION_OF_LAMELLIPODIUM_ORGANIZATION	GO_REGULATION_OF_LAMELLIPODIUM_ORGANIZATION		32	0.546037	1.5424	0.0484262	0.601912	1	258	tags=9%, list=2%, signal=10%	HeterovsU937	pos
															GO_POSITIVE_REGULATION_OF_EXTRINSIC_APOPTOTIC_SIGNALING_PATHWAY	GO_POSITIVE_REGULATION_OF_EXTRINSIC_APOPTOTIC_SIGNALING_PATHWAY		37	-0.457364	-1.29271	0.129412	0.602082	1	3593	tags=35%, list=26%, signal=48%	HeterovsU937	neg
															GO_GLUCOCORTICOID_METABOLIC_PROCESS	GO_GLUCOCORTICOID_METABOLIC_PROCESS		11	0.65022	1.50562	0.097619	0.602302	1	883	tags=27%, list=7%, signal=29%	HeterovsU937	pos
															GO_PYRIMIDINE_RIBONUCLEOSIDE_TRIPHOSPHATE_METABOLIC_PROCESS	GO_PYRIMIDINE_RIBONUCLEOSIDE_TRIPHOSPHATE_METABOLIC_PROCESS		12	0.701533	1.62517	0.041958	0.602502	1	1448	tags=25%, list=11%, signal=28%	HeterovsU937	pos
															GO_MEIOTIC_CELL_CYCLE	GO_MEIOTIC_CELL_CYCLE		159	0.391569	1.45225	0.015015	0.602503	1	2670	tags=35%, list=20%, signal=43%	HeterovsU937	pos
															GO_REGULATION_OF_T_CELL_APOPTOTIC_PROCESS	GO_REGULATION_OF_T_CELL_APOPTOTIC_PROCESS		20	0.57599	1.44808	0.0953608	0.602568	1	17	tags=5%, list=0%, signal=5%	HeterovsU937	pos
															GO_DOPAMINE_TRANSPORT	GO_DOPAMINE_TRANSPORT		20	-0.644028	-1.43136	0.0746667	0.602572	1	1434	tags=40%, list=11%, signal=45%	HomovsHetero	neg
															GO_NEGATIVE_REGULATION_OF_PROTEIN_LOCALIZATION_TO_CELL_SURFACE	GO_NEGATIVE_REGULATION_OF_PROTEIN_LOCALIZATION_TO_CELL_SURFACE		11	0.704941	1.62695	0.0608108	0.602585	1	487	tags=18%, list=4%, signal=19%	HeterovsU937	pos
															GO_HISTONE_H3_K27_METHYLATION	GO_HISTONE_H3_K27_METHYLATION		13	0.613909	1.58666	0.0431894	0.602595	1	1334	tags=46%, list=10%, signal=51%	HomovsU937	pos
															GO_KIDNEY_EPITHELIUM_DEVELOPMENT	GO_KIDNEY_EPITHELIUM_DEVELOPMENT		71	0.451781	1.49732	0.0323383	0.60262	1	874	tags=18%, list=6%, signal=19%	HeterovsU937	pos
															GO_AROMATIC_AMINO_ACID_FAMILY_CATABOLIC_PROCESS	GO_AROMATIC_AMINO_ACID_FAMILY_CATABOLIC_PROCESS		18	-0.654443	-1.4309	0.0775862	0.602623	1	2053	tags=39%, list=15%, signal=46%	HomovsHetero	neg
															GO_RESPONSE_TO_MUSCLE_ACTIVITY	GO_RESPONSE_TO_MUSCLE_ACTIVITY		14	-0.676502	-1.43319	0.0909091	0.602727	1	1698	tags=29%, list=13%, signal=33%	HomovsHetero	neg
															GO_NEUROBLAST_DIVISION	GO_NEUROBLAST_DIVISION		11	-0.732772	-1.4336	0.0833333	0.602867	1	943	tags=18%, list=7%, signal=20%	HomovsHetero	neg
															GO_NEUROBLAST_DIVISION	GO_NEUROBLAST_DIVISION		11	0.649471	1.47242	0.095	0.603001	1	1726	tags=36%, list=13%, signal=42%	HeterovsU937	pos
															GO_HOMOLOGOUS_CHROMOSOME_PAIRING_AT_MEIOSIS	GO_HOMOLOGOUS_CHROMOSOME_PAIRING_AT_MEIOSIS		27	0.534029	1.45122	0.0857143	0.603014	1	2499	tags=44%, list=18%, signal=54%	HeterovsU937	pos
															GO_ESTABLISHMENT_OF_PIGMENT_GRANULE_LOCALIZATION	GO_ESTABLISHMENT_OF_PIGMENT_GRANULE_LOCALIZATION		18	-0.52419	-1.29148	0.161179	0.603118	1	1966	tags=33%, list=14%, signal=39%	HeterovsU937	neg
															GO_REGULATION_OF_SPINDLE_CHECKPOINT	GO_REGULATION_OF_SPINDLE_CHECKPOINT		12	0.620305	1.45035	0.0988235	0.603137	1	2935	tags=50%, list=22%, signal=64%	HeterovsU937	pos
															GO_PROTEIN_METHYLATION	GO_PROTEIN_METHYLATION		142	0.391501	1.46686	0.0179104	0.603246	1	3462	tags=39%, list=25%, signal=51%	HeterovsU937	pos
															GO_IONOTROPIC_GLUTAMATE_RECEPTOR_SIGNALING_PATHWAY	GO_IONOTROPIC_GLUTAMATE_RECEPTOR_SIGNALING_PATHWAY		14	-0.668727	-1.42977	0.111111	0.603532	1	1020	tags=29%, list=8%, signal=31%	HomovsHetero	neg
															GO_REGULATION_OF_BICELLULAR_TIGHT_JUNCTION_ASSEMBLY	GO_REGULATION_OF_BICELLULAR_TIGHT_JUNCTION_ASSEMBLY	Details ...	16	0.748074	1.85103	0.00252525	0.60382	0.992	312	tags=19%, list=2%, signal=19%	HeterovsU937	pos
															GO_COLLAGEN_BIOSYNTHETIC_PROCESS	GO_COLLAGEN_BIOSYNTHETIC_PROCESS		23	0.550905	1.47571	0.076555	0.603832	1	944	tags=17%, list=7%, signal=19%	HeterovsU937	pos
															GO_REGULATION_OF_KERATINOCYTE_DIFFERENTIATION	GO_REGULATION_OF_KERATINOCYTE_DIFFERENTIATION		20	0.606564	1.55169	0.0708661	0.603851	1	640	tags=15%, list=5%, signal=16%	HeterovsU937	pos
															GO_MEMBRANE_REPOLARIZATION_DURING_ACTION_POTENTIAL	GO_MEMBRANE_REPOLARIZATION_DURING_ACTION_POTENTIAL		16	0.604237	1.47305	0.101124	0.603894	1	244	tags=13%, list=2%, signal=13%	HeterovsU937	pos
															GO_RESPONSE_TO_AMINE	GO_RESPONSE_TO_AMINE		29	0.517661	1.45266	0.0863309	0.603914	1	513	tags=14%, list=4%, signal=14%	HeterovsU937	pos
															GO_REGULATION_OF_LIPASE_ACTIVITY	GO_REGULATION_OF_LIPASE_ACTIVITY		49	-0.571278	-1.43999	0.0440476	0.60392	1	977	tags=24%, list=7%, signal=26%	HomovsHetero	neg
															GO_NEURON_PROJECTION_ORGANIZATION	GO_NEURON_PROJECTION_ORGANIZATION		67	-0.541171	-1.42605	0.0408627	0.603947	1	2432	tags=33%, list=18%, signal=40%	HomovsHetero	neg
															GO_POSITIVE_REGULATION_OF_STEM_CELL_PROLIFERATION	GO_POSITIVE_REGULATION_OF_STEM_CELL_PROLIFERATION		22	0.622017	1.63186	0.0440098	0.604042	1	302	tags=14%, list=2%, signal=14%	HeterovsU937	pos
															GO_MYOBLAST_FUSION	GO_MYOBLAST_FUSION		23	-0.623874	-1.42876	0.0869565	0.604097	1	1123	tags=35%, list=8%, signal=38%	HomovsHetero	neg
															GO_NEGATIVE_REGULATION_OF_EPITHELIAL_CELL_MIGRATION	GO_NEGATIVE_REGULATION_OF_EPITHELIAL_CELL_MIGRATION		43	-0.578478	-1.42559	0.0558252	0.604128	1	254	tags=12%, list=2%, signal=12%	HomovsHetero	neg
															GO_MEMBRANE_REPOLARIZATION	GO_MEMBRANE_REPOLARIZATION		25	0.547741	1.50611	0.0922693	0.604158	1	583	tags=20%, list=4%, signal=21%	HeterovsU937	pos
															GO_TRNA_CATABOLIC_PROCESS	GO_TRNA_CATABOLIC_PROCESS		10	0.647514	1.4747	0.101415	0.604181	1	2088	tags=40%, list=15%, signal=47%	HeterovsU937	pos
															GO_GENITALIA_DEVELOPMENT	GO_GENITALIA_DEVELOPMENT		20	-0.6299	-1.43417	0.0729443	0.604434	1	900	tags=15%, list=7%, signal=16%	HomovsHetero	neg
															GO_PROSTATE_GLAND_MORPHOGENESIS	GO_PROSTATE_GLAND_MORPHOGENESIS		10	0.750839	1.66243	0.0246914	0.604451	1	541	tags=40%, list=4%, signal=42%	HeterovsU937	pos
															GO_SIGNAL_TRANSDUCTION_IN_ABSENCE_OF_LIGAND	GO_SIGNAL_TRANSDUCTION_IN_ABSENCE_OF_LIGAND		46	0.493224	1.46731	0.039267	0.604502	1	2032	tags=30%, list=15%, signal=36%	HeterovsU937	pos
															GO_ENDOSOME_ORGANIZATION	GO_ENDOSOME_ORGANIZATION		64	0.442796	1.44087	0.0607595	0.604636	1	810	tags=11%, list=6%, signal=12%	HeterovsU937	pos
															GO_NEGATIVE_REGULATION_OF_RESPONSE_TO_OXIDATIVE_STRESS	GO_NEGATIVE_REGULATION_OF_RESPONSE_TO_OXIDATIVE_STRESS		32	0.50942	1.45324	0.0626566	0.604743	1	1168	tags=22%, list=9%, signal=24%	HeterovsU937	pos
															GO_EPITHELIAL_CELL_DIFFERENTIATION_INVOLVED_IN_KIDNEY_DEVELOPMENT	GO_EPITHELIAL_CELL_DIFFERENTIATION_INVOLVED_IN_KIDNEY_DEVELOPMENT		20	-0.650399	-1.43454	0.0731383	0.604823	1	286	tags=20%, list=2%, signal=20%	HomovsHetero	neg
															GO_MONOAMINE_TRANSPORT	GO_MONOAMINE_TRANSPORT		33	0.583878	1.66436	0.026455	0.604862	1	666	tags=27%, list=5%, signal=29%	HeterovsU937	pos
															GO_REGULATION_OF_ANIMAL_ORGAN_MORPHOGENESIS	GO_REGULATION_OF_ANIMAL_ORGAN_MORPHOGENESIS		150	0.388375	1.46812	0.0110497	0.604878	1	595	tags=9%, list=4%, signal=10%	HeterovsU937	pos
															GO_BONE_GROWTH	GO_BONE_GROWTH		18	-0.660249	-1.43362	0.107242	0.604958	1	1215	tags=28%, list=9%, signal=30%	HomovsHetero	neg
															GO_PHOSPHATIDYLSERINE_METABOLIC_PROCESS	GO_PHOSPHATIDYLSERINE_METABOLIC_PROCESS		18	0.590164	1.47356	0.102381	0.605022	1	1087	tags=17%, list=8%, signal=18%	HeterovsU937	pos
															GO_ACTIN_FILAMENT_BUNDLE_ORGANIZATION	GO_ACTIN_FILAMENT_BUNDLE_ORGANIZATION		106	0.435038	1.53216	0.0027027	0.605032	1	822	tags=12%, list=6%, signal=13%	HeterovsU937	pos
															GO_EAR_MORPHOGENESIS	GO_EAR_MORPHOGENESIS		58	0.449663	1.4431	0.0433604	0.605057	1	1143	tags=19%, list=8%, signal=21%	HeterovsU937	pos
															GO_POSITIVE_REGULATION_OF_CYTOPLASMIC_TRANSPORT	GO_POSITIVE_REGULATION_OF_CYTOPLASMIC_TRANSPORT		10	0.729214	1.64241	0.0395349	0.605091	1	14	tags=10%, list=0%, signal=10%	HeterovsU937	pos
															GO_AMINE_TRANSPORT	GO_AMINE_TRANSPORT		36	0.532711	1.53331	0.0451306	0.605187	1	641	tags=19%, list=5%, signal=20%	HeterovsU937	pos
															GO_REGULATION_OF_MICROTUBULE_DEPOLYMERIZATION	GO_REGULATION_OF_MICROTUBULE_DEPOLYMERIZATION		23	-0.629356	-1.42622	0.0735294	0.605192	1	1413	tags=22%, list=10%, signal=24%	HomovsHetero	neg
															GO_MYOFIBRIL_ASSEMBLY	GO_MYOFIBRIL_ASSEMBLY		28	-0.61658	-1.43492	0.0571066	0.605217	1	987	tags=25%, list=7%, signal=27%	HomovsHetero	neg
															GO_MITOTIC_METAPHASE_PLATE_CONGRESSION	GO_MITOTIC_METAPHASE_PLATE_CONGRESSION		39	0.498934	1.49751	0.0459184	0.605244	1	3057	tags=41%, list=23%, signal=53%	HeterovsU937	pos
															GO_MRNA_SPLICE_SITE_SELECTION	GO_MRNA_SPLICE_SITE_SELECTION		27	0.541725	1.54517	0.0620525	0.605285	1	4471	tags=67%, list=33%, signal=99%	HeterovsU937	pos
															GO_REGULATION_OF_T_CELL_DIFFERENTIATION_IN_THYMUS	GO_REGULATION_OF_T_CELL_DIFFERENTIATION_IN_THYMUS		20	0.578039	1.47619	0.0663616	0.605292	1	792	tags=20%, list=6%, signal=21%	HeterovsU937	pos
															GO_NEUROTRANSMITTER_REUPTAKE	GO_NEUROTRANSMITTER_REUPTAKE		14	0.612489	1.62898	0.0482315	0.605304	1	30	tags=14%, list=0%, signal=14%	HomovsU937	pos
															GO_HISTONE_H3_K9_ACETYLATION	GO_HISTONE_H3_K9_ACETYLATION		10	0.67544	1.49846	0.0928571	0.605575	1	3857	tags=80%, list=28%, signal=112%	HeterovsU937	pos
															GO_STEM_CELL_PROLIFERATION	GO_STEM_CELL_PROLIFERATION		67	0.496892	1.63322	0.00968523	0.605664	1	302	tags=10%, list=2%, signal=11%	HeterovsU937	pos
															GO_RESPONSE_TO_INTERLEUKIN_6	GO_RESPONSE_TO_INTERLEUKIN_6		28	-0.604924	-1.42747	0.0738423	0.605754	1	1906	tags=21%, list=14%, signal=25%	HomovsHetero	neg
															GO_REGULATION_OF_WOUND_HEALING	GO_REGULATION_OF_WOUND_HEALING		79	-0.510412	-1.45083	0.0285401	0.605894	1	2979	tags=38%, list=22%, signal=48%	HomovsU937	neg
															GO_LONG_TERM_SYNAPTIC_DEPRESSION	GO_LONG_TERM_SYNAPTIC_DEPRESSION		17	-0.644923	-1.45133	0.0640327	0.606097	1	1377	tags=29%, list=10%, signal=33%	HomovsU937	neg
															GO_PROTEIN_K11_LINKED_UBIQUITINATION	GO_PROTEIN_K11_LINKED_UBIQUITINATION		26	0.557864	1.50657	0.0728643	0.6061	1	675	tags=8%, list=5%, signal=8%	HeterovsU937	pos
															GO_POSITIVE_REGULATION_OF_CELL_JUNCTION_ASSEMBLY	GO_POSITIVE_REGULATION_OF_CELL_JUNCTION_ASSEMBLY		47	-0.565883	-1.42471	0.0490082	0.606136	1	1327	tags=28%, list=10%, signal=31%	HomovsHetero	neg
															GO_NEGATIVE_REGULATION_OF_ION_TRANSMEMBRANE_TRANSPORT	GO_NEGATIVE_REGULATION_OF_ION_TRANSMEMBRANE_TRANSPORT		58	0.446404	1.44116	0.0555556	0.606176	1	513	tags=9%, list=4%, signal=9%	HeterovsU937	pos
															GO_RENAL_FILTRATION	GO_RENAL_FILTRATION		11	-0.720327	-1.42691	0.076006	0.606223	1	1124	tags=36%, list=8%, signal=40%	HomovsHetero	neg
															GO_DERMATAN_SULFATE_PROTEOGLYCAN_METABOLIC_PROCESS	GO_DERMATAN_SULFATE_PROTEOGLYCAN_METABOLIC_PROCESS		11	0.641152	1.45794	0.114679	0.606347	1	696	tags=27%, list=5%, signal=29%	HeterovsU937	pos
															GO_NEGATIVE_REGULATION_OF_DNA_TEMPLATED_TRANSCRIPTION_ELONGATION	GO_NEGATIVE_REGULATION_OF_DNA_TEMPLATED_TRANSCRIPTION_ELONGATION		13	0.62804	1.50755	0.0804878	0.606386	1	2653	tags=46%, list=20%, signal=57%	HeterovsU937	pos
															GO_EPITHELIAL_TUBE_FORMATION	GO_EPITHELIAL_TUBE_FORMATION		89	0.413369	1.45357	0.0408163	0.60643	1	3213	tags=40%, list=24%, signal=53%	HeterovsU937	pos
															GO_SENSORY_PERCEPTION_OF_TASTE	GO_SENSORY_PERCEPTION_OF_TASTE		12	-0.673561	-1.45178	0.0982405	0.606484	1	295	tags=17%, list=2%, signal=17%	HomovsU937	neg
															GO_LIPID_EXPORT_FROM_CELL	GO_LIPID_EXPORT_FROM_CELL		18	-0.667267	-1.43512	0.0772414	0.606535	1	1540	tags=28%, list=11%, signal=31%	HomovsHetero	neg
															GO_DETECTION_OF_STIMULUS_INVOLVED_IN_SENSORY_PERCEPTION_OF_PAIN	GO_DETECTION_OF_STIMULUS_INVOLVED_IN_SENSORY_PERCEPTION_OF_PAIN		14	-0.558171	-1.28948	0.170435	0.606546	1	2172	tags=43%, list=16%, signal=51%	HeterovsU937	neg
															GO_NEGATIVE_REGULATION_OF_ENDOPLASMIC_RETICULUM_STRESS_INDUCED_INTRINSIC_APOPTOTIC_SIGNALING_PATHWAY	GO_NEGATIVE_REGULATION_OF_ENDOPLASMIC_RETICULUM_STRESS_INDUCED_INTRINSIC_APOPTOTIC_SIGNALING_PATHWAY		14	0.678646	1.62777	0.0306604	0.606644	1	14	tags=7%, list=0%, signal=7%	HeterovsU937	pos
															GO_DIGESTIVE_TRACT_MORPHOGENESIS	GO_DIGESTIVE_TRACT_MORPHOGENESIS		22	-0.637672	-1.42635	0.0843061	0.6067	1	600	tags=18%, list=4%, signal=19%	HomovsHetero	neg
															GO_DETECTION_OF_STIMULUS_INVOLVED_IN_SENSORY_PERCEPTION_OF_PAIN	GO_DETECTION_OF_STIMULUS_INVOLVED_IN_SENSORY_PERCEPTION_OF_PAIN		14	-0.694378	-1.42773	0.0838235	0.606712	1	137	tags=14%, list=1%, signal=14%	HomovsHetero	neg
															GO_POSITIVE_REGULATION_OF_TUMOR_NECROSIS_FACTOR_SUPERFAMILY_CYTOKINE_PRODUCTION	GO_POSITIVE_REGULATION_OF_TUMOR_NECROSIS_FACTOR_SUPERFAMILY_CYTOKINE_PRODUCTION		59	-0.417246	-1.2898	0.131175	0.606776	1	1663	tags=24%, list=12%, signal=27%	HeterovsU937	neg
															GO_NEGATIVE_REGULATION_OF_CD4_POSITIVE_ALPHA_BETA_T_CELL_ACTIVATION	GO_NEGATIVE_REGULATION_OF_CD4_POSITIVE_ALPHA_BETA_T_CELL_ACTIVATION	Details ...	22	0.52677	1.65376	0.0133929	0.606791	1	1662	tags=32%, list=12%, signal=36%	HomovsU937	pos
															GO_ANIMAL_ORGAN_FORMATION	GO_ANIMAL_ORGAN_FORMATION		31	0.524593	1.46842	0.0779221	0.606845	1	1143	tags=29%, list=8%, signal=32%	HeterovsU937	pos
															GO_POSITIVE_REGULATION_OF_NUCLEAR_DIVISION	GO_POSITIVE_REGULATION_OF_NUCLEAR_DIVISION		45	0.504868	1.55562	0.0343137	0.607078	1	988	tags=24%, list=7%, signal=26%	HeterovsU937	pos
															GO_REGULATION_OF_OXIDATIVE_STRESS_INDUCED_INTRINSIC_APOPTOTIC_SIGNALING_PATHWAY	GO_REGULATION_OF_OXIDATIVE_STRESS_INDUCED_INTRINSIC_APOPTOTIC_SIGNALING_PATHWAY		23	0.538557	1.44157	0.0902613	0.607374	1	1907	tags=26%, list=14%, signal=30%	HeterovsU937	pos
															GO_MESONEPHRIC_TUBULE_MORPHOGENESIS	GO_MESONEPHRIC_TUBULE_MORPHOGENESIS		30	0.538284	1.45666	0.0726392	0.607376	1	1042	tags=33%, list=8%, signal=36%	HeterovsU937	pos
															GO_NADH_METABOLIC_PROCESS	GO_NADH_METABOLIC_PROCESS		28	0.514461	1.39493	0.112782	0.60741	1	97	tags=7%, list=1%, signal=7%	HeterovsU937	pos
															GO_POSITIVE_REGULATION_OF_TOLL_LIKE_RECEPTOR_SIGNALING_PATHWAY	GO_POSITIVE_REGULATION_OF_TOLL_LIKE_RECEPTOR_SIGNALING_PATHWAY		13	0.640402	1.49996	0.0792291	0.607456	1	4	tags=8%, list=0%, signal=8%	HeterovsU937	pos
															GO_GLUCOSE_IMPORT	GO_GLUCOSE_IMPORT		45	0.462964	1.3956	0.0807292	0.607469	1	751	tags=11%, list=6%, signal=12%	HeterovsU937	pos
															GO_REGULATION_OF_NEUROTRANSMITTER_RECEPTOR_ACTIVITY	GO_REGULATION_OF_NEUROTRANSMITTER_RECEPTOR_ACTIVITY		41	-0.446049	-1.28668	0.158155	0.607525	1	1431	tags=37%, list=11%, signal=41%	HeterovsU937	neg
															GO_ACUTE_PHASE_RESPONSE	GO_ACUTE_PHASE_RESPONSE		18	-0.522035	-1.28708	0.186125	0.607606	1	2390	tags=44%, list=18%, signal=54%	HeterovsU937	neg
															GO_EMBRYONIC_HEMOPOIESIS	GO_EMBRYONIC_HEMOPOIESIS		15	0.650114	1.55433	0.0695444	0.607652	1	1579	tags=33%, list=12%, signal=38%	HeterovsU937	pos
															GO_STEM_CELL_PROLIFERATION	GO_STEM_CELL_PROLIFERATION		67	-0.539596	-1.42305	0.0379888	0.607669	1	1350	tags=16%, list=10%, signal=18%	HomovsHetero	neg
															GO_CHROMOSOME_ORGANIZATION_INVOLVED_IN_MEIOTIC_CELL_CYCLE	GO_CHROMOSOME_ORGANIZATION_INVOLVED_IN_MEIOTIC_CELL_CYCLE		44	0.495154	1.50924	0.0376344	0.607727	1	2670	tags=43%, list=20%, signal=54%	HeterovsU937	pos
															GO_REGULATION_OF_VESICLE_SIZE	GO_REGULATION_OF_VESICLE_SIZE		10	0.685309	1.55185	0.0683544	0.60777	1	68	tags=10%, list=1%, signal=10%	HeterovsU937	pos
															GO_POSITIVE_REGULATION_OF_INTERLEUKIN_10_PRODUCTION	GO_POSITIVE_REGULATION_OF_INTERLEUKIN_10_PRODUCTION		20	0.562418	1.45834	0.0906667	0.607796	1	4	tags=5%, list=0%, signal=5%	HeterovsU937	pos
															GO_AMINOGLYCAN_CATABOLIC_PROCESS	GO_AMINOGLYCAN_CATABOLIC_PROCESS		36	0.51283	1.49874	0.0571429	0.608036	1	575	tags=14%, list=4%, signal=14%	HeterovsU937	pos
															GO_EMBRYONIC_EYE_MORPHOGENESIS	GO_EMBRYONIC_EYE_MORPHOGENESIS		15	0.586002	1.45392	0.116625	0.608049	1	400	tags=13%, list=3%, signal=14%	HeterovsU937	pos
															GO_L_SERINE_METABOLIC_PROCESS	GO_L_SERINE_METABOLIC_PROCESS		12	-0.566678	-1.28731	0.18887	0.608098	1	895	tags=25%, list=7%, signal=27%	HeterovsU937	neg
															GO_CELLULAR_COMPONENT_ASSEMBLY_INVOLVED_IN_MORPHOGENESIS	GO_CELLULAR_COMPONENT_ASSEMBLY_INVOLVED_IN_MORPHOGENESIS		57	-0.554917	-1.43523	0.0404494	0.608287	1	987	tags=21%, list=7%, signal=23%	HomovsHetero	neg
															GO_REGULATION_OF_STRIATED_MUSCLE_CELL_DIFFERENTIATION	GO_REGULATION_OF_STRIATED_MUSCLE_CELL_DIFFERENTIATION	Details ...	57	0.443597	1.71043	0.00724638	0.608302	1	1547	tags=30%, list=11%, signal=34%	HomovsU937	pos
															GO_EAR_MORPHOGENESIS	GO_EAR_MORPHOGENESIS		58	-0.561058	-1.42377	0.0455556	0.608349	1	1198	tags=22%, list=9%, signal=24%	HomovsHetero	neg
															GO_SIGNAL_TRANSDUCTION_INVOLVED_IN_CELL_CYCLE_CHECKPOINT	GO_SIGNAL_TRANSDUCTION_INVOLVED_IN_CELL_CYCLE_CHECKPOINT		62	0.440974	1.45463	0.0397878	0.608522	1	3403	tags=35%, list=25%, signal=47%	HeterovsU937	pos
															GO_REGULATION_OF_KERATINOCYTE_DIFFERENTIATION	GO_REGULATION_OF_KERATINOCYTE_DIFFERENTIATION	Details ...	20	0.584812	1.7193	0.0353982	0.608552	1	1662	tags=30%, list=12%, signal=34%	HomovsU937	pos
															GO_REGULATION_OF_LIGASE_ACTIVITY	GO_REGULATION_OF_LIGASE_ACTIVITY		10	-0.593539	-1.28837	0.212014	0.608677	1	962	tags=20%, list=7%, signal=22%	HeterovsU937	neg
															GO_POSTSYNAPSE_ORGANIZATION	GO_POSTSYNAPSE_ORGANIZATION	Details ...	109	-0.594399	-1.72696	0	0.394163	1	1702	tags=29%, list=13%, signal=33%	HomovsU937	neg
															GO_POSITIVE_REGULATION_OF_CELLULAR_RESPONSE_TO_INSULIN_STIMULUS	GO_POSITIVE_REGULATION_OF_CELLULAR_RESPONSE_TO_INSULIN_STIMULUS		19	-0.503354	-1.2875	0.181818	0.608777	1	1927	tags=26%, list=14%, signal=31%	HeterovsU937	neg
															GO_NEPHRON_MORPHOGENESIS	GO_NEPHRON_MORPHOGENESIS		35	0.522955	1.46873	0.05	0.608846	1	1181	tags=31%, list=9%, signal=34%	HeterovsU937	pos
															GO_POSITIVE_REGULATION_OF_ANIMAL_ORGAN_MORPHOGENESIS	GO_POSITIVE_REGULATION_OF_ANIMAL_ORGAN_MORPHOGENESIS		41	-0.580787	-1.43698	0.0595948	0.609008	1	761	tags=20%, list=6%, signal=21%	HomovsHetero	neg
															GO_REGULATION_OF_ENDOPLASMIC_RETICULUM_STRESS_INDUCED_INTRINSIC_APOPTOTIC_SIGNALING_PATHWAY	GO_REGULATION_OF_ENDOPLASMIC_RETICULUM_STRESS_INDUCED_INTRINSIC_APOPTOTIC_SIGNALING_PATHWAY		22	0.585872	1.50785	0.0805195	0.609029	1	1335	tags=14%, list=10%, signal=15%	HeterovsU937	pos
															GO_ER_NUCLEUS_SIGNALING_PATHWAY	GO_ER_NUCLEUS_SIGNALING_PATHWAY		41	-0.438485	-1.28781	0.143573	0.609125	1	1284	tags=12%, list=9%, signal=13%	HeterovsU937	neg
															GO_EPITHELIAL_CELL_CELL_ADHESION	GO_EPITHELIAL_CELL_CELL_ADHESION		11	0.59627	1.39567	0.145833	0.609265	1	314	tags=27%, list=2%, signal=28%	HeterovsU937	pos
															GO_REGULATION_OF_GLUCOSE_IMPORT	GO_REGULATION_OF_GLUCOSE_IMPORT		37	0.499511	1.45522	0.0631068	0.609302	1	328	tags=8%, list=2%, signal=8%	HeterovsU937	pos
															GO_REGULATION_OF_INCLUSION_BODY_ASSEMBLY	GO_REGULATION_OF_INCLUSION_BODY_ASSEMBLY		12	0.600927	1.39625	0.168981	0.609521	1	3266	tags=58%, list=24%, signal=77%	HeterovsU937	pos
															GO_TOLL_LIKE_RECEPTOR_9_SIGNALING_PATHWAY	GO_TOLL_LIKE_RECEPTOR_9_SIGNALING_PATHWAY		18	-0.655345	-1.4231	0.0746888	0.609528	1	1083	tags=22%, list=8%, signal=24%	HomovsHetero	neg
															GO_MEMBRANE_REPOLARIZATION_DURING_ACTION_POTENTIAL	GO_MEMBRANE_REPOLARIZATION_DURING_ACTION_POTENTIAL		16	-0.674928	-1.43781	0.0890805	0.609538	1	742	tags=19%, list=5%, signal=20%	HomovsHetero	neg
															GO_POSITIVE_REGULATION_OF_MITOCHONDRIAL_FISSION	GO_POSITIVE_REGULATION_OF_MITOCHONDRIAL_FISSION		14	0.634391	1.50031	0.101176	0.609753	1	14	tags=7%, list=0%, signal=7%	HeterovsU937	pos
															GO_SEMI_LUNAR_VALVE_DEVELOPMENT	GO_SEMI_LUNAR_VALVE_DEVELOPMENT		18	-0.622893	-1.44947	0.0768156	0.609787	1	686	tags=22%, list=5%, signal=23%	HomovsU937	neg
															GO_DEFENSE_RESPONSE_TO_BACTERIUM	GO_DEFENSE_RESPONSE_TO_BACTERIUM		97	-0.531678	-1.43537	0.0262605	0.609857	1	1590	tags=24%, list=12%, signal=27%	HomovsHetero	neg
															GO_NUCLEOBASE_BIOSYNTHETIC_PROCESS	GO_NUCLEOBASE_BIOSYNTHETIC_PROCESS		18	0.593047	1.50221	0.0755149	0.609977	1	23	tags=6%, list=0%, signal=6%	HeterovsU937	pos
															GO_REGULATION_OF_KERATINOCYTE_PROLIFERATION	GO_REGULATION_OF_KERATINOCYTE_PROLIFERATION		14	0.586892	1.40843	0.140878	0.610139	1	99	tags=14%, list=1%, signal=14%	HeterovsU937	pos
															GO_GLIAL_CELL_ACTIVATION	GO_GLIAL_CELL_ACTIVATION		33	0.523244	1.45838	0.065445	0.610426	1	959	tags=27%, list=7%, signal=29%	HeterovsU937	pos
															GO_CHROMOSOME_SEPARATION	GO_CHROMOSOME_SEPARATION		79	0.416917	1.4128	0.0496278	0.610487	1	3155	tags=41%, list=23%, signal=52%	HeterovsU937	pos
															GO_INSULIN_LIKE_GROWTH_FACTOR_RECEPTOR_SIGNALING_PATHWAY	GO_INSULIN_LIKE_GROWTH_FACTOR_RECEPTOR_SIGNALING_PATHWAY		17	0.581008	1.50108	0.101176	0.610525	1	2373	tags=41%, list=17%, signal=50%	HeterovsU937	pos
															GO_HEMATOPOIETIC_STEM_CELL_PROLIFERATION	GO_HEMATOPOIETIC_STEM_CELL_PROLIFERATION		16	0.597409	1.50947	0.0601852	0.610547	1	725	tags=13%, list=5%, signal=13%	HeterovsU937	pos
															GO_PHARYNGEAL_SYSTEM_DEVELOPMENT	GO_PHARYNGEAL_SYSTEM_DEVELOPMENT		11	0.619739	1.43332	0.115299	0.610592	1	840	tags=27%, list=6%, signal=29%	HeterovsU937	pos
															GO_CAMERA_TYPE_EYE_PHOTORECEPTOR_CELL_DIFFERENTIATION	GO_CAMERA_TYPE_EYE_PHOTORECEPTOR_CELL_DIFFERENTIATION		10	0.640505	1.40306	0.139485	0.610608	1	38	tags=10%, list=0%, signal=10%	HeterovsU937	pos
															GO_DENDRITIC_SPINE_MAINTENANCE	GO_DENDRITIC_SPINE_MAINTENANCE		16	-0.667436	-1.43711	0.0843707	0.610662	1	2432	tags=44%, list=18%, signal=53%	HomovsHetero	neg
															GO_SENSORY_PERCEPTION_OF_MECHANICAL_STIMULUS	GO_SENSORY_PERCEPTION_OF_MECHANICAL_STIMULUS		80	-0.536762	-1.43568	0.0262582	0.610677	1	903	tags=15%, list=7%, signal=16%	HomovsHetero	neg
															GO_MODULATION_BY_HOST_OF_VIRAL_PROCESS	GO_MODULATION_BY_HOST_OF_VIRAL_PROCESS		19	0.55331	1.38342	0.142529	0.610692	1	905	tags=16%, list=7%, signal=17%	HeterovsU937	pos
															GO_AXON_ENSHEATHMENT_IN_CENTRAL_NERVOUS_SYSTEM	GO_AXON_ENSHEATHMENT_IN_CENTRAL_NERVOUS_SYSTEM		11	0.760265	1.67153	0.0288462	0.610783	1	630	tags=27%, list=5%, signal=29%	HeterovsU937	pos
															GO_STRIATED_MUSCLE_CELL_DIFFERENTIATION	GO_STRIATED_MUSCLE_CELL_DIFFERENTIATION		146	0.371444	1.40666	0.0163934	0.610908	1	801	tags=13%, list=6%, signal=14%	HeterovsU937	pos
															GO_KINETOCHORE_ORGANIZATION	GO_KINETOCHORE_ORGANIZATION		18	0.55939	1.40441	0.122302	0.610916	1	5093	tags=78%, list=37%, signal=124%	HeterovsU937	pos
															GO_POSITIVE_REGULATION_OF_LEUKOCYTE_APOPTOTIC_PROCESS	GO_POSITIVE_REGULATION_OF_LEUKOCYTE_APOPTOTIC_PROCESS		15	0.598633	1.45907	0.0990783	0.610925	1	17	tags=7%, list=0%, signal=7%	HeterovsU937	pos
															GO_STRIATED_MUSCLE_ADAPTATION	GO_STRIATED_MUSCLE_ADAPTATION		22	0.539956	1.38529	0.132251	0.611024	1	110	tags=9%, list=1%, signal=9%	HeterovsU937	pos
															GO_MITOTIC_METAPHASE_PLATE_CONGRESSION	GO_MITOTIC_METAPHASE_PLATE_CONGRESSION		39	0.454192	1.58669	0.0121212	0.611035	1	4412	tags=46%, list=32%, signal=68%	HomovsU937	pos
															GO_MORPHOGENESIS_OF_EMBRYONIC_EPITHELIUM	GO_MORPHOGENESIS_OF_EMBRYONIC_EPITHELIUM		96	0.401563	1.39639	0.0406091	0.611118	1	2627	tags=33%, list=19%, signal=41%	HeterovsU937	pos
															GO_MITOTIC_CELL_CYCLE_CHECKPOINT	GO_MITOTIC_CELL_CYCLE_CHECKPOINT		139	0.397218	1.45981	0.010989	0.611172	1	3403	tags=38%, list=25%, signal=50%	HeterovsU937	pos
															GO_POSITIVE_REGULATION_OF_POTASSIUM_ION_TRANSMEMBRANE_TRANSPORTER_ACTIVITY	GO_POSITIVE_REGULATION_OF_POTASSIUM_ION_TRANSMEMBRANE_TRANSPORTER_ACTIVITY		11	0.619425	1.40582	0.133495	0.611192	1	244	tags=18%, list=2%, signal=18%	HeterovsU937	pos
															GO_NEGATIVE_REGULATION_OF_CHROMOSOME_ORGANIZATION	GO_NEGATIVE_REGULATION_OF_CHROMOSOME_ORGANIZATION		112	0.392088	1.4036	0.0350404	0.611228	1	3313	tags=38%, list=24%, signal=49%	HeterovsU937	pos
															GO_NUCLEOSOME_ORGANIZATION	GO_NUCLEOSOME_ORGANIZATION		80	0.414693	1.43232	0.060274	0.611262	1	5136	tags=71%, list=38%, signal=114%	HeterovsU937	pos
															GO_IRON_ION_TRANSMEMBRANE_TRANSPORT	GO_IRON_ION_TRANSMEMBRANE_TRANSPORT		10	0.639524	1.38651	0.166667	0.611349	1	44	tags=10%, list=0%, signal=10%	HeterovsU937	pos
															GO_REGULATION_OF_CYTOPLASMIC_TRANSPORT	GO_REGULATION_OF_CYTOPLASMIC_TRANSPORT		22	0.534452	1.4072	0.119718	0.61143	1	14	tags=5%, list=0%, signal=5%	HeterovsU937	pos
															GO_PROTEIN_LOCALIZATION_TO_CHROMOSOME_CENTROMERIC_REGION	GO_PROTEIN_LOCALIZATION_TO_CHROMOSOME_CENTROMERIC_REGION		21	0.541671	1.3927	0.0955882	0.611647	1	3426	tags=48%, list=25%, signal=64%	HeterovsU937	pos
															GO_REGULATION_OF_MITOTIC_SPINDLE_ASSEMBLY	GO_REGULATION_OF_MITOTIC_SPINDLE_ASSEMBLY		15	0.569255	1.63038	0.0458015	0.611648	1	1766	tags=33%, list=13%, signal=38%	HomovsU937	pos
															GO_T_CELL_APOPTOTIC_PROCESS	GO_T_CELL_APOPTOTIC_PROCESS		30	0.487198	1.38367	0.106218	0.611815	1	17	tags=3%, list=0%, signal=3%	HeterovsU937	pos
															GO_BODY_MORPHOGENESIS	GO_BODY_MORPHOGENESIS		29	-0.613452	-1.43781	0.0580076	0.611852	1	1376	tags=21%, list=10%, signal=23%	HomovsHetero	neg
															GO_NEGATIVE_REGULATION_OF_SUPRAMOLECULAR_FIBER_ORGANIZATION	GO_NEGATIVE_REGULATION_OF_SUPRAMOLECULAR_FIBER_ORGANIZATION		98	0.400936	1.40855	0.022792	0.611969	1	740	tags=8%, list=5%, signal=9%	HeterovsU937	pos
															GO_BLASTODERM_SEGMENTATION	GO_BLASTODERM_SEGMENTATION		10	-0.73037	-1.4203	0.103348	0.611991	1	489	tags=30%, list=4%, signal=31%	HomovsHetero	neg
															GO_HOMOLOGOUS_CHROMOSOME_SEGREGATION	GO_HOMOLOGOUS_CHROMOSOME_SEGREGATION		36	0.492337	1.4018	0.104218	0.612098	1	2670	tags=42%, list=20%, signal=52%	HeterovsU937	pos
															GO_T_HELPER_2_CELL_DIFFERENTIATION	GO_T_HELPER_2_CELL_DIFFERENTIATION	Details ...	11	0.687982	1.68346	0.0217984	0.61213	1	1258	tags=45%, list=9%, signal=50%	HomovsHetero	pos
															GO_CENTROSOME_DUPLICATION	GO_CENTROSOME_DUPLICATION		54	0.453214	1.42036	0.0526316	0.612374	1	2935	tags=41%, list=22%, signal=52%	HeterovsU937	pos
															GO_NEGATIVE_REGULATION_OF_SMOOTH_MUSCLE_CELL_DIFFERENTIATION	GO_NEGATIVE_REGULATION_OF_SMOOTH_MUSCLE_CELL_DIFFERENTIATION		11	-0.707707	-1.41935	0.105498	0.612375	1	1029	tags=18%, list=8%, signal=20%	HomovsHetero	neg
															GO_DNA_MODIFICATION	GO_DNA_MODIFICATION		80	0.420047	1.39171	0.0737914	0.612412	1	2841	tags=39%, list=21%, signal=49%	HeterovsU937	pos
															GO_ZINC_ION_HOMEOSTASIS	GO_ZINC_ION_HOMEOSTASIS		21	0.548222	1.41288	0.12156	0.612446	1	303	tags=10%, list=2%, signal=10%	HeterovsU937	pos
															GO_PROTEIN_CONTAINING_COMPLEX_REMODELING	GO_PROTEIN_CONTAINING_COMPLEX_REMODELING		12	-0.700006	-1.42063	0.101892	0.612482	1	272	tags=17%, list=2%, signal=17%	HomovsHetero	neg
															GO_SUBSTRATE_DEPENDENT_CELL_MIGRATION	GO_SUBSTRATE_DEPENDENT_CELL_MIGRATION		20	0.539998	1.40458	0.13082	0.612564	1	701	tags=20%, list=5%, signal=21%	HeterovsU937	pos
															GO_MITOTIC_G2_DNA_DAMAGE_CHECKPOINT	GO_MITOTIC_G2_DNA_DAMAGE_CHECKPOINT		21	0.539247	1.63345	0.0191571	0.612575	1	3578	tags=67%, list=26%, signal=90%	HomovsU937	pos
															GO_CILIARY_BASAL_BODY_PLASMA_MEMBRANE_DOCKING	GO_CILIARY_BASAL_BODY_PLASMA_MEMBRANE_DOCKING		87	0.408827	1.39662	0.0505319	0.612577	1	3185	tags=39%, list=23%, signal=51%	HeterovsU937	pos
															GO_RELEASE_OF_CYTOCHROME_C_FROM_MITOCHONDRIA	GO_RELEASE_OF_CYTOCHROME_C_FROM_MITOCHONDRIA		40	0.489102	1.43346	0.057072	0.612613	1	1641	tags=25%, list=12%, signal=28%	HeterovsU937	pos
															GO_DNA_PACKAGING	GO_DNA_PACKAGING		124	0.391605	1.42251	0.0304709	0.612673	1	3291	tags=41%, list=24%, signal=54%	HeterovsU937	pos
															GO_SYNAPTIC_VESICLE_TRANSPORT	GO_SYNAPTIC_VESICLE_TRANSPORT		32	0.483967	1.38538	0.115566	0.612692	1	452	tags=9%, list=3%, signal=10%	HeterovsU937	pos
															GO_DNA_DEPENDENT_DNA_REPLICATION	GO_DNA_DEPENDENT_DNA_REPLICATION		130	0.385639	1.40006	0.0351351	0.612779	1	3801	tags=45%, list=28%, signal=62%	HeterovsU937	pos
															GO_POSITIVE_REGULATION_OF_P38MAPK_CASCADE	GO_POSITIVE_REGULATION_OF_P38MAPK_CASCADE		19	0.561024	1.4358	0.107143	0.612805	1	636	tags=16%, list=5%, signal=17%	HeterovsU937	pos
															GO_RESPONSE_TO_ISCHEMIA	GO_RESPONSE_TO_ISCHEMIA		37	-0.583546	-1.41661	0.0611511	0.612814	1	1340	tags=16%, list=10%, signal=18%	HomovsHetero	neg
															GO_REGULATION_OF_NUCLEOTIDE_BIOSYNTHETIC_PROCESS	GO_REGULATION_OF_NUCLEOTIDE_BIOSYNTHETIC_PROCESS		25	-0.623401	-1.42102	0.0742638	0.612817	1	1152	tags=24%, list=8%, signal=26%	HomovsHetero	neg
															GO_INTERSTRAND_CROSS_LINK_REPAIR	GO_INTERSTRAND_CROSS_LINK_REPAIR		47	0.457859	1.39013	0.0944882	0.612835	1	3714	tags=55%, list=27%, signal=76%	HeterovsU937	pos
															GO_ICOSANOID_METABOLIC_PROCESS	GO_ICOSANOID_METABOLIC_PROCESS		49	0.447686	1.38666	0.0777202	0.612876	1	2516	tags=37%, list=19%, signal=45%	HeterovsU937	pos
															GO_POSITIVE_REGULATION_OF_MICROTUBULE_POLYMERIZATION_OR_DEPOLYMERIZATION	GO_POSITIVE_REGULATION_OF_MICROTUBULE_POLYMERIZATION_OR_DEPOLYMERIZATION		28	-0.612515	-1.4357	0.0687898	0.612878	1	148	tags=7%, list=1%, signal=7%	HomovsHetero	neg
															GO_MEMBRANE_DEPOLARIZATION_DURING_ACTION_POTENTIAL	GO_MEMBRANE_DEPOLARIZATION_DURING_ACTION_POTENTIAL		14	0.641767	1.52422	0.0769231	0.612883	1	583	tags=21%, list=4%, signal=22%	HeterovsU937	pos
															GO_CYTOKINETIC_PROCESS	GO_CYTOKINETIC_PROCESS		31	0.501055	1.41422	0.0944882	0.613026	1	2540	tags=39%, list=19%, signal=48%	HeterovsU937	pos
															GO_NEPHRON_EPITHELIUM_DEVELOPMENT	GO_NEPHRON_EPITHELIUM_DEVELOPMENT		52	0.448354	1.38391	0.0638821	0.613036	1	1181	tags=23%, list=9%, signal=25%	HeterovsU937	pos
															GO_POSITIVE_REGULATION_OF_PROTEIN_POLYUBIQUITINATION	GO_POSITIVE_REGULATION_OF_PROTEIN_POLYUBIQUITINATION		10	0.673686	1.51749	0.0679157	0.613104	1	1206	tags=30%, list=9%, signal=33%	HeterovsU937	pos
															GO_DEVELOPMENTAL_GROWTH_INVOLVED_IN_MORPHOGENESIS	GO_DEVELOPMENTAL_GROWTH_INVOLVED_IN_MORPHOGENESIS		144	-0.505851	-1.41962	0.0163934	0.613124	1	1779	tags=24%, list=13%, signal=28%	HomovsHetero	neg
															GO_REGULATION_OF_VASCULATURE_DEVELOPMENT	GO_REGULATION_OF_VASCULATURE_DEVELOPMENT		195	-0.501777	-1.4144	0.00708502	0.613158	1	1587	tags=22%, list=12%, signal=25%	HomovsHetero	neg
															GO_RESPONSE_TO_AMPHETAMINE	GO_RESPONSE_TO_AMPHETAMINE		20	0.631216	1.66469	0.0247525	0.613196	1	513	tags=20%, list=4%, signal=21%	HeterovsU937	pos
															GO_DNA_REPLICATION_CHECKPOINT	GO_DNA_REPLICATION_CHECKPOINT		15	0.571555	1.59091	0.0484429	0.613201	1	3343	tags=67%, list=25%, signal=88%	HomovsU937	pos
															GO_REGULATION_OF_CHROMOSOME_SEGREGATION	GO_REGULATION_OF_CHROMOSOME_SEGREGATION		87	0.413618	1.39914	0.0462725	0.613229	1	3183	tags=40%, list=23%, signal=52%	HeterovsU937	pos
															GO_BASEMENT_MEMBRANE_ORGANIZATION	GO_BASEMENT_MEMBRANE_ORGANIZATION		16	-0.661587	-1.41394	0.0964187	0.613286	1	1853	tags=38%, list=14%, signal=43%	HomovsHetero	neg
															GO_RNA_INTERFERENCE	GO_RNA_INTERFERENCE		16	0.55924	1.41104	0.112941	0.613453	1	4319	tags=63%, list=32%, signal=92%	HeterovsU937	pos
															GO_SYNAPTIC_VESICLE_RECYCLING	GO_SYNAPTIC_VESICLE_RECYCLING		53	0.52011	1.62789	0.0128535	0.613566	1	641	tags=15%, list=5%, signal=16%	HeterovsU937	pos
															GO_RESPIRATORY_SYSTEM_DEVELOPMENT	GO_RESPIRATORY_SYSTEM_DEVELOPMENT		116	0.384934	1.38714	0.0472222	0.613567	1	2368	tags=28%, list=17%, signal=33%	HeterovsU937	pos
															GO_REGULATION_OF_MICROTUBULE_POLYMERIZATION_OR_DEPOLYMERIZATION	GO_REGULATION_OF_MICROTUBULE_POLYMERIZATION_OR_DEPOLYMERIZATION		62	0.435725	1.41324	0.0704961	0.613615	1	2752	tags=34%, list=20%, signal=42%	HeterovsU937	pos
															GO_CEREBRAL_CORTEX_CELL_MIGRATION	GO_CEREBRAL_CORTEX_CELL_MIGRATION		26	0.518877	1.38168	0.0911215	0.613715	1	4197	tags=54%, list=31%, signal=78%	HeterovsU937	pos
															GO_EXOCRINE_SYSTEM_DEVELOPMENT	GO_EXOCRINE_SYSTEM_DEVELOPMENT		31	0.537495	1.5262	0.0483871	0.613718	1	845	tags=26%, list=6%, signal=27%	HeterovsU937	pos
															GO_AUTONOMIC_NERVOUS_SYSTEM_DEVELOPMENT	GO_AUTONOMIC_NERVOUS_SYSTEM_DEVELOPMENT		17	-0.647294	-1.41814	0.100567	0.613825	1	37	tags=12%, list=0%, signal=12%	HomovsHetero	neg
															GO_PALLIUM_DEVELOPMENT	GO_PALLIUM_DEVELOPMENT		106	0.388505	1.3884	0.0444444	0.613896	1	1854	tags=17%, list=14%, signal=20%	HeterovsU937	pos
															GO_POSITIVE_REGULATION_OF_RELEASE_OF_CYTOCHROME_C_FROM_MITOCHONDRIA	GO_POSITIVE_REGULATION_OF_RELEASE_OF_CYTOCHROME_C_FROM_MITOCHONDRIA		22	0.532406	1.38909	0.123153	0.613898	1	1641	tags=23%, list=12%, signal=26%	HeterovsU937	pos
															GO_PROTEIN_K63_LINKED_UBIQUITINATION	GO_PROTEIN_K63_LINKED_UBIQUITINATION		47	0.468473	1.40862	0.0750605	0.61391	1	211	tags=4%, list=2%, signal=4%	HeterovsU937	pos
															GO_MITOTIC_DNA_INTEGRITY_CHECKPOINT	GO_MITOTIC_DNA_INTEGRITY_CHECKPOINT		93	0.41269	1.43623	0.0257732	0.613923	1	3403	tags=39%, list=25%, signal=51%	HeterovsU937	pos
															GO_DICARBOXYLIC_ACID_BIOSYNTHETIC_PROCESS	GO_DICARBOXYLIC_ACID_BIOSYNTHETIC_PROCESS		11	-0.705801	-1.4168	0.104348	0.613952	1	2262	tags=45%, list=17%, signal=54%	HomovsHetero	neg
															GO_REGULATION_OF_EXOSOMAL_SECRETION	GO_REGULATION_OF_EXOSOMAL_SECRETION		13	0.646804	1.50953	0.0788288	0.613972	1	14	tags=8%, list=0%, signal=8%	HeterovsU937	pos
															GO_MITOPHAGY	GO_MITOPHAGY		24	0.516136	1.39043	0.106965	0.61401	1	14	tags=4%, list=0%, signal=4%	HeterovsU937	pos
															GO_REGULATION_OF_INTRINSIC_APOPTOTIC_SIGNALING_PATHWAY_BY_P53_CLASS_MEDIATOR	GO_REGULATION_OF_INTRINSIC_APOPTOTIC_SIGNALING_PATHWAY_BY_P53_CLASS_MEDIATOR		20	0.564165	1.41463	0.105943	0.614014	1	1552	tags=20%, list=11%, signal=23%	HeterovsU937	pos
															GO_POSITIVE_REGULATION_OF_LAMELLIPODIUM_ASSEMBLY	GO_POSITIVE_REGULATION_OF_LAMELLIPODIUM_ASSEMBLY	Details ...	17	0.735529	1.81485	0.00917431	0.614062	0.999	96	tags=12%, list=1%, signal=12%	HeterovsU937	pos
															GO_REGULATION_OF_STEM_CELL_PROLIFERATION	GO_REGULATION_OF_STEM_CELL_PROLIFERATION	Details ...	33	0.495931	1.71335	0.0103093	0.614081	1	447	tags=18%, list=3%, signal=19%	HomovsU937	pos
															GO_CELL_CELL_ADHESION_VIA_PLASMA_MEMBRANE_ADHESION_MOLECULES	GO_CELL_CELL_ADHESION_VIA_PLASMA_MEMBRANE_ADHESION_MOLECULES		85	-0.533894	-1.41719	0.0289079	0.614091	1	1696	tags=28%, list=12%, signal=32%	HomovsHetero	neg
															GO_CELLULAR_COMPONENT_DISASSEMBLY_INVOLVED_IN_EXECUTION_PHASE_OF_APOPTOSIS	GO_CELLULAR_COMPONENT_DISASSEMBLY_INVOLVED_IN_EXECUTION_PHASE_OF_APOPTOSIS	Details ...	22	0.577582	1.70565	0.0247934	0.614199	1	3842	tags=55%, list=28%, signal=76%	HomovsHetero	pos
															GO_NEGATIVE_REGULATION_OF_PEPTIDE_HORMONE_SECRETION	GO_NEGATIVE_REGULATION_OF_PEPTIDE_HORMONE_SECRETION		22	0.528939	1.43373	0.10181	0.614206	1	328	tags=9%, list=2%, signal=9%	HeterovsU937	pos
															GO_CENTRAL_NERVOUS_SYSTEM_NEURON_DEVELOPMENT	GO_CENTRAL_NERVOUS_SYSTEM_NEURON_DEVELOPMENT		46	0.472988	1.43694	0.0641975	0.61425	1	2051	tags=30%, list=15%, signal=36%	HeterovsU937	pos
															GO_CELL_CYCLE_CHECKPOINT	GO_CELL_CYCLE_CHECKPOINT		181	0.368473	1.39673	0.0207101	0.614313	1	3403	tags=35%, list=25%, signal=46%	HeterovsU937	pos
															GO_GLAND_MORPHOGENESIS	GO_GLAND_MORPHOGENESIS		69	0.421617	1.38754	0.0498753	0.614377	1	845	tags=19%, list=6%, signal=20%	HeterovsU937	pos
															GO_NEGATIVE_REGULATION_OF_JNK_CASCADE	GO_NEGATIVE_REGULATION_OF_JNK_CASCADE		26	0.525775	1.42581	0.0941476	0.614412	1	1927	tags=23%, list=14%, signal=27%	HeterovsU937	pos
															GO_HISTONE_H4_K20_METHYLATION	GO_HISTONE_H4_K20_METHYLATION		10	0.64846	1.42044	0.129754	0.614435	1	3444	tags=60%, list=25%, signal=80%	HeterovsU937	pos
															GO_MODIFICATION_OF_SYNAPTIC_STRUCTURE	GO_MODIFICATION_OF_SYNAPTIC_STRUCTURE		17	-0.529355	-1.28348	0.165605	0.614441	1	1066	tags=18%, list=8%, signal=19%	HeterovsU937	neg
															GO_POSITIVE_REGULATION_OF_AXONOGENESIS	GO_POSITIVE_REGULATION_OF_AXONOGENESIS		57	0.435335	1.35689	0.08	0.614463	1	379	tags=7%, list=3%, signal=7%	HeterovsU937	pos
															GO_ARF_PROTEIN_SIGNAL_TRANSDUCTION	GO_ARF_PROTEIN_SIGNAL_TRANSDUCTION		17	-0.533849	-1.28302	0.157895	0.614468	1	1031	tags=18%, list=8%, signal=19%	HeterovsU937	neg
															GO_NEGATIVE_REGULATION_OF_RNA_SPLICING	GO_NEGATIVE_REGULATION_OF_RNA_SPLICING		24	0.518594	1.38007	0.115909	0.614515	1	4352	tags=54%, list=32%, signal=80%	HeterovsU937	pos
															GO_RENAL_FILTRATION	GO_RENAL_FILTRATION		11	-0.697368	-1.44789	0.0737463	0.614566	1	461	tags=27%, list=3%, signal=28%	HomovsU937	neg
															GO_CELLULAR_RESPONSE_TO_DRUG	GO_CELLULAR_RESPONSE_TO_DRUG		46	0.457849	1.40015	0.085	0.614589	1	712	tags=15%, list=5%, signal=16%	HeterovsU937	pos
															GO_CELL_PROLIFERATION_IN_FOREBRAIN	GO_CELL_PROLIFERATION_IN_FOREBRAIN		16	-0.66363	-1.41536	0.0920863	0.61463	1	1738	tags=31%, list=13%, signal=36%	HomovsHetero	neg
															GO_REGULATION_OF_HEART_RATE	GO_REGULATION_OF_HEART_RATE		45	-0.555401	-1.41449	0.0636574	0.614632	1	1207	tags=22%, list=9%, signal=24%	HomovsHetero	neg
															GO_REGULATION_OF_DENDRITE_EXTENSION	GO_REGULATION_OF_DENDRITE_EXTENSION		16	0.67499	1.67499	0.0263736	0.614638	1	487	tags=25%, list=4%, signal=26%	HeterovsU937	pos
															GO_EMBRYONIC_PLACENTA_MORPHOGENESIS	GO_EMBRYONIC_PLACENTA_MORPHOGENESIS		13	0.589735	1.42262	0.154897	0.614652	1	212	tags=15%, list=2%, signal=16%	HeterovsU937	pos
															GO_POSITIVE_REGULATION_OF_GLIAL_CELL_DIFFERENTIATION	GO_POSITIVE_REGULATION_OF_GLIAL_CELL_DIFFERENTIATION		26	0.557321	1.51044	0.0580046	0.614697	1	536	tags=12%, list=4%, signal=12%	HeterovsU937	pos
															GO_PHENOL_CONTAINING_COMPOUND_BIOSYNTHETIC_PROCESS	GO_PHENOL_CONTAINING_COMPOUND_BIOSYNTHETIC_PROCESS		18	-0.667052	-1.42105	0.0764873	0.61474	1	730	tags=17%, list=5%, signal=18%	HomovsHetero	neg
															GO_METANEPHRIC_EPITHELIUM_DEVELOPMENT	GO_METANEPHRIC_EPITHELIUM_DEVELOPMENT		10	0.629768	1.40907	0.117381	0.614838	1	1865	tags=40%, list=14%, signal=46%	HeterovsU937	pos
															GO_REGULATION_OF_NUCLEAR_DIVISION	GO_REGULATION_OF_NUCLEAR_DIVISION		133	0.414413	1.51154	0.00273973	0.614891	1	2615	tags=33%, list=19%, signal=41%	HeterovsU937	pos
															GO_MALE_SEX_DIFFERENTIATION	GO_MALE_SEX_DIFFERENTIATION		91	0.403673	1.38061	0.0341207	0.614907	1	883	tags=16%, list=7%, signal=18%	HeterovsU937	pos
															GO_NEURAL_RETINA_DEVELOPMENT	GO_NEURAL_RETINA_DEVELOPMENT		33	-0.592001	-1.41569	0.0711563	0.614987	1	1468	tags=27%, list=11%, signal=31%	HomovsHetero	neg
															GO_EXTRACELLULAR_VESICLE_BIOGENESIS	GO_EXTRACELLULAR_VESICLE_BIOGENESIS		16	0.59522	1.42488	0.111675	0.615019	1	14	tags=6%, list=0%, signal=6%	HeterovsU937	pos
															GO_PROTEIN_AUTOUBIQUITINATION	GO_PROTEIN_AUTOUBIQUITINATION		60	0.450981	1.43427	0.0679612	0.615022	1	1152	tags=10%, list=8%, signal=11%	HeterovsU937	pos
															GO_POSITIVE_REGULATION_OF_INTERFERON_ALPHA_PRODUCTION	GO_POSITIVE_REGULATION_OF_INTERFERON_ALPHA_PRODUCTION		15	-0.536415	-1.28369	0.155357	0.615093	1	438	tags=13%, list=3%, signal=14%	HeterovsU937	neg
															GO_INNER_EAR_MORPHOGENESIS	GO_INNER_EAR_MORPHOGENESIS		47	0.473399	1.4209	0.078534	0.615234	1	974	tags=19%, list=7%, signal=21%	HeterovsU937	pos
															GO_REGULATION_OF_SYSTEMIC_ARTERIAL_BLOOD_PRESSURE_BY_HORMONE	GO_REGULATION_OF_SYSTEMIC_ARTERIAL_BLOOD_PRESSURE_BY_HORMONE		14	-0.663046	-1.41824	0.117731	0.615348	1	2095	tags=43%, list=15%, signal=51%	HomovsHetero	neg
															GO_TELENCEPHALON_DEVELOPMENT	GO_TELENCEPHALON_DEVELOPMENT		151	0.361672	1.35595	0.04	0.615359	1	592	tags=8%, list=4%, signal=8%	HeterovsU937	pos
															GO_REGULATION_OF_MITOPHAGY	GO_REGULATION_OF_MITOPHAGY		17	0.606822	1.51902	0.0736342	0.615485	1	14	tags=6%, list=0%, signal=6%	HeterovsU937	pos
															GO_POSITIVE_REGULATION_OF_HISTONE_H3_K4_METHYLATION	GO_POSITIVE_REGULATION_OF_HISTONE_H3_K4_METHYLATION		14	0.589431	1.40954	0.139151	0.615631	1	2489	tags=43%, list=18%, signal=52%	HeterovsU937	pos
															GO_RESPONSE_TO_TUMOR_CELL	GO_RESPONSE_TO_TUMOR_CELL		15	-0.669051	-1.41729	0.122563	0.615643	1	1826	tags=40%, list=13%, signal=46%	HomovsHetero	neg
															GO_POSITIVE_REGULATION_OF_PATTERN_RECOGNITION_RECEPTOR_SIGNALING_PATHWAY	GO_POSITIVE_REGULATION_OF_PATTERN_RECOGNITION_RECEPTOR_SIGNALING_PATHWAY		22	0.54287	1.41552	0.120603	0.615663	1	1335	tags=18%, list=10%, signal=20%	HeterovsU937	pos
															GO_REGULATION_OF_MEMBRANE_REPOLARIZATION	GO_REGULATION_OF_MEMBRANE_REPOLARIZATION		18	0.563394	1.41482	0.106538	0.615691	1	583	tags=22%, list=4%, signal=23%	HeterovsU937	pos
															GO_REGULATION_OF_CARDIAC_MUSCLE_CELL_MEMBRANE_REPOLARIZATION	GO_REGULATION_OF_CARDIAC_MUSCLE_CELL_MEMBRANE_REPOLARIZATION		15	0.551638	1.35514	0.174129	0.615843	1	583	tags=20%, list=4%, signal=21%	HeterovsU937	pos
															GO_SPINDLE_LOCALIZATION	GO_SPINDLE_LOCALIZATION		39	0.445618	1.58778	0.0416667	0.61585	1	2666	tags=36%, list=20%, signal=45%	HomovsU937	pos
															GO_DETECTION_OF_OTHER_ORGANISM	GO_DETECTION_OF_OTHER_ORGANISM		12	0.662732	1.52673	0.0831354	0.61587	1	165	tags=17%, list=1%, signal=17%	HeterovsU937	pos
															GO_NEGATIVE_REGULATION_OF_OXIDATIVE_STRESS_INDUCED_NEURON_DEATH	GO_NEGATIVE_REGULATION_OF_OXIDATIVE_STRESS_INDUCED_NEURON_DEATH		17	0.613759	1.51774	0.0756501	0.615946	1	1168	tags=24%, list=9%, signal=26%	HeterovsU937	pos
															GO_POTASSIUM_ION_HOMEOSTASIS	GO_POTASSIUM_ION_HOMEOSTASIS		14	0.631658	1.52781	0.0807601	0.615973	1	244	tags=14%, list=2%, signal=15%	HeterovsU937	pos
															GO_REGULATION_OF_NEUROTRANSMITTER_LEVELS	GO_REGULATION_OF_NEUROTRANSMITTER_LEVELS		134	0.367423	1.35821	0.0397878	0.615993	1	740	tags=13%, list=5%, signal=13%	HeterovsU937	pos
															GO_REGULATION_OF_TRANSCRIPTION_OF_NUCLEOLAR_LARGE_RRNA_BY_RNA_POLYMERASE_I	GO_REGULATION_OF_TRANSCRIPTION_OF_NUCLEOLAR_LARGE_RRNA_BY_RNA_POLYMERASE_I		11	0.595497	1.35692	0.167866	0.616096	1	3834	tags=64%, list=28%, signal=89%	HeterovsU937	pos
															GO_ANTERIOR_POSTERIOR_AXIS_SPECIFICATION	GO_ANTERIOR_POSTERIOR_AXIS_SPECIFICATION		22	0.642254	1.66829	0.028169	0.616098	1	542	tags=27%, list=4%, signal=28%	HeterovsU937	pos
															GO_TOLERANCE_INDUCTION	GO_TOLERANCE_INDUCTION		13	0.582166	1.35881	0.154897	0.616128	1	429	tags=15%, list=3%, signal=16%	HeterovsU937	pos
															GO_MONOCARBOXYLIC_ACID_CATABOLIC_PROCESS	GO_MONOCARBOXYLIC_ACID_CATABOLIC_PROCESS		99	0.410462	1.42603	0.0369393	0.616132	1	1268	tags=18%, list=9%, signal=20%	HeterovsU937	pos
															GO_NEGATIVE_REGULATION_OF_OXIDOREDUCTASE_ACTIVITY	GO_NEGATIVE_REGULATION_OF_OXIDOREDUCTASE_ACTIVITY		15	-0.681065	-1.4146	0.0899032	0.616162	1	1254	tags=27%, list=9%, signal=29%	HomovsHetero	neg
															GO_MEIOSIS_I_CELL_CYCLE_PROCESS	GO_MEIOSIS_I_CELL_CYCLE_PROCESS		76	0.404282	1.36002	0.0759162	0.61631	1	3620	tags=45%, list=27%, signal=61%	HeterovsU937	pos
															GO_CARDIAC_MUSCLE_CELL_MEMBRANE_REPOLARIZATION	GO_CARDIAC_MUSCLE_CELL_MEMBRANE_REPOLARIZATION		22	0.536805	1.39673	0.134146	0.616344	1	583	tags=18%, list=4%, signal=19%	HeterovsU937	pos
															GO_REGULATION_OF_MICROTUBULE_DEPOLYMERIZATION	GO_REGULATION_OF_MICROTUBULE_DEPOLYMERIZATION		23	0.512005	1.36057	0.130024	0.616514	1	15	tags=4%, list=0%, signal=4%	HeterovsU937	pos
															GO_POSITIVE_REGULATION_OF_GROWTH	GO_POSITIVE_REGULATION_OF_GROWTH		159	0.372986	1.42273	0.0176471	0.61665	1	842	tags=11%, list=6%, signal=11%	HeterovsU937	pos
															GO_HISTONE_METHYLATION	GO_HISTONE_METHYLATION		111	0.430811	1.52425	0.0151899	0.616738	1	3462	tags=44%, list=25%, signal=59%	HeterovsU937	pos
															GO_FATTY_ACID_CATABOLIC_PROCESS	GO_FATTY_ACID_CATABOLIC_PROCESS		85	0.442828	1.51526	0.0146699	0.616967	1	1268	tags=20%, list=9%, signal=22%	HeterovsU937	pos
															GO_POTASSIUM_ION_TRANSPORT	GO_POTASSIUM_ION_TRANSPORT		104	0.387081	1.35722	0.0433604	0.617079	1	583	tags=12%, list=4%, signal=12%	HeterovsU937	pos
															GO_MITOTIC_CYTOKINESIS	GO_MITOTIC_CYTOKINESIS		54	0.433953	1.35903	0.104712	0.617237	1	2615	tags=37%, list=19%, signal=46%	HeterovsU937	pos
															GO_NEUTROPHIL_HOMEOSTASIS	GO_NEUTROPHIL_HOMEOSTASIS		12	-0.568215	-1.28163	0.172474	0.617363	1	1399	tags=42%, list=10%, signal=46%	HeterovsU937	neg
															GO_REGULATION_OF_CELL_JUNCTION_ASSEMBLY	GO_REGULATION_OF_CELL_JUNCTION_ASSEMBLY		107	0.402663	1.42638	0.0338028	0.617438	1	866	tags=13%, list=6%, signal=14%	HeterovsU937	pos
															GO_REGULATION_OF_SISTER_CHROMATID_SEGREGATION	GO_REGULATION_OF_SISTER_CHROMATID_SEGREGATION		70	0.423118	1.36593	0.0680101	0.617566	1	3167	tags=41%, list=23%, signal=54%	HeterovsU937	pos
															GO_POSITIVE_REGULATION_OF_VASCULAR_PERMEABILITY	GO_POSITIVE_REGULATION_OF_VASCULAR_PERMEABILITY		13	0.581295	1.37831	0.156566	0.617734	1	482	tags=23%, list=4%, signal=24%	HeterovsU937	pos
															GO_REGULATION_OF_ENDOTHELIAL_CELL_DIFFERENTIATION	GO_REGULATION_OF_ENDOTHELIAL_CELL_DIFFERENTIATION		25	0.518176	1.41554	0.103865	0.617896	1	668	tags=16%, list=5%, signal=17%	HeterovsU937	pos
															GO_LABYRINTHINE_LAYER_MORPHOGENESIS	GO_LABYRINTHINE_LAYER_MORPHOGENESIS		11	0.624463	1.3969	0.147903	0.61793	1	212	tags=18%, list=2%, signal=18%	HeterovsU937	pos
															GO_BRANCHING_MORPHOGENESIS_OF_AN_EPITHELIAL_TUBE	GO_BRANCHING_MORPHOGENESIS_OF_AN_EPITHELIAL_TUBE		79	0.414936	1.41779	0.0485175	0.617937	1	845	tags=18%, list=6%, signal=19%	HeterovsU937	pos
															GO_POSITIVE_REGULATION_OF_INTERFERON_BETA_PRODUCTION	GO_POSITIVE_REGULATION_OF_INTERFERON_BETA_PRODUCTION		24	0.512388	1.36069	0.147196	0.617949	1	4	tags=4%, list=0%, signal=4%	HeterovsU937	pos
															GO_REGULATION_OF_BONE_DEVELOPMENT	GO_REGULATION_OF_BONE_DEVELOPMENT		17	-0.52929	-1.28099	0.176471	0.617991	1	2981	tags=53%, list=22%, signal=68%	HeterovsU937	neg
															GO_POSITIVE_REGULATION_OF_MITOPHAGY	GO_POSITIVE_REGULATION_OF_MITOPHAGY		11	0.667677	1.51171	0.0725	0.618063	1	14	tags=9%, list=0%, signal=9%	HeterovsU937	pos
															GO_POSITIVE_REGULATION_OF_SUPRAMOLECULAR_FIBER_ORGANIZATION	GO_POSITIVE_REGULATION_OF_SUPRAMOLECULAR_FIBER_ORGANIZATION		144	0.380321	1.42693	0.0308989	0.6181	1	1051	tags=11%, list=8%, signal=12%	HeterovsU937	pos
															GO_REGULATION_OF_EXTRINSIC_APOPTOTIC_SIGNALING_PATHWAY_IN_ABSENCE_OF_LIGAND	GO_REGULATION_OF_EXTRINSIC_APOPTOTIC_SIGNALING_PATHWAY_IN_ABSENCE_OF_LIGAND		29	0.486403	1.59469	0.0137615	0.618227	1	1458	tags=31%, list=11%, signal=35%	HomovsU937	pos
															GO_SPECIFICATION_OF_ANIMAL_ORGAN_IDENTITY	GO_SPECIFICATION_OF_ANIMAL_ORGAN_IDENTITY		15	0.57282	1.41614	0.122642	0.618321	1	840	tags=27%, list=6%, signal=28%	HeterovsU937	pos
															GO_LEUKOCYTE_APOPTOTIC_PROCESS	GO_LEUKOCYTE_APOPTOTIC_PROCESS		71	0.41292	1.3618	0.0879397	0.618384	1	17	tags=3%, list=0%, signal=3%	HeterovsU937	pos
															GO_REGULATION_OF_NEURON_MIGRATION	GO_REGULATION_OF_NEURON_MIGRATION		27	0.558236	1.51929	0.0549738	0.618474	1	201	tags=11%, list=1%, signal=11%	HeterovsU937	pos
															GO_MRNA_CIS_SPLICING_VIA_SPLICEOSOME	GO_MRNA_CIS_SPLICING_VIA_SPLICEOSOME		30	0.502625	1.4228	0.08933	0.618718	1	4146	tags=60%, list=31%, signal=86%	HeterovsU937	pos
															GO_B_CELL_ACTIVATION_INVOLVED_IN_IMMUNE_RESPONSE	GO_B_CELL_ACTIVATION_INVOLVED_IN_IMMUNE_RESPONSE		59	-0.411464	-1.27525	0.137987	0.618857	1	2954	tags=32%, list=22%, signal=41%	HeterovsU937	neg
															GO_REGULATION_OF_LIPOPROTEIN_LIPASE_ACTIVITY	GO_REGULATION_OF_LIPOPROTEIN_LIPASE_ACTIVITY		11	-0.72032	-1.41226	0.102041	0.619026	1	489	tags=36%, list=4%, signal=38%	HomovsHetero	neg
															GO_NEUROINFLAMMATORY_RESPONSE	GO_NEUROINFLAMMATORY_RESPONSE	Details ...	38	0.487892	1.65392	0.0107527	0.619218	1	665	tags=24%, list=5%, signal=25%	HomovsU937	pos
															GO_GLUCOSE_CATABOLIC_PROCESS	GO_GLUCOSE_CATABOLIC_PROCESS		26	0.504174	1.36596	0.145985	0.619248	1	2032	tags=27%, list=15%, signal=32%	HeterovsU937	pos
															GO_MUSCLE_CELL_DIFFERENTIATION	GO_MUSCLE_CELL_DIFFERENTIATION		197	0.366688	1.42897	0.00621118	0.619326	1	801	tags=12%, list=6%, signal=13%	HeterovsU937	pos
															GO_REGULATION_OF_CHROMOSOME_SEPARATION	GO_REGULATION_OF_CHROMOSOME_SEPARATION		56	0.450867	1.41656	0.0675	0.619328	1	3148	tags=39%, list=23%, signal=51%	HeterovsU937	pos
															GO_POSITIVE_REGULATION_OF_CARDIAC_MUSCLE_TISSUE_DEVELOPMENT	GO_POSITIVE_REGULATION_OF_CARDIAC_MUSCLE_TISSUE_DEVELOPMENT		23	0.537779	1.42808	0.0983213	0.619422	1	99	tags=9%, list=1%, signal=9%	HeterovsU937	pos
															GO_POSITIVE_REGULATION_OF_LIPID_KINASE_ACTIVITY	GO_POSITIVE_REGULATION_OF_LIPID_KINASE_ACTIVITY		22	0.520254	1.36204	0.133971	0.619458	1	1144	tags=32%, list=8%, signal=35%	HeterovsU937	pos
															GO_HUMORAL_IMMUNE_RESPONSE_MEDIATED_BY_CIRCULATING_IMMUNOGLOBULIN	GO_HUMORAL_IMMUNE_RESPONSE_MEDIATED_BY_CIRCULATING_IMMUNOGLOBULIN		24	-0.498809	-1.27965	0.180036	0.61951	1	1310	tags=46%, list=10%, signal=51%	HeterovsU937	neg
															GO_CELL_DEATH_IN_RESPONSE_TO_OXIDATIVE_STRESS	GO_CELL_DEATH_IN_RESPONSE_TO_OXIDATIVE_STRESS		60	0.424388	1.36075	0.0795756	0.619552	1	1907	tags=25%, list=14%, signal=29%	HeterovsU937	pos
															GO_POSITIVE_REGULATION_OF_TUMOR_NECROSIS_FACTOR_SECRETION	GO_POSITIVE_REGULATION_OF_TUMOR_NECROSIS_FACTOR_SECRETION		16	-0.523044	-1.27671	0.196277	0.619584	1	1486	tags=25%, list=11%, signal=28%	HeterovsU937	neg
															GO_POSITIVE_REGULATION_OF_CHROMOSOME_SEPARATION	GO_POSITIVE_REGULATION_OF_CHROMOSOME_SEPARATION		14	0.578069	1.36265	0.148241	0.619621	1	2531	tags=36%, list=19%, signal=44%	HeterovsU937	pos
															GO_ANION_HOMEOSTASIS	GO_ANION_HOMEOSTASIS		33	-0.463315	-1.27537	0.155172	0.619749	1	2635	tags=36%, list=19%, signal=45%	HeterovsU937	neg
															GO_REGULATION_OF_GLIAL_CELL_DIFFERENTIATION	GO_REGULATION_OF_GLIAL_CELL_DIFFERENTIATION		41	0.462182	1.36456	0.100737	0.619765	1	579	tags=12%, list=4%, signal=13%	HeterovsU937	pos
															GO_INTRINSIC_APOPTOTIC_SIGNALING_PATHWAY_IN_RESPONSE_TO_OXIDATIVE_STRESS	GO_INTRINSIC_APOPTOTIC_SIGNALING_PATHWAY_IN_RESPONSE_TO_OXIDATIVE_STRESS		36	0.494538	1.42718	0.0913349	0.619769	1	1907	tags=25%, list=14%, signal=29%	HeterovsU937	pos
															GO_MORPHOGENESIS_OF_AN_EPITHELIAL_FOLD	GO_MORPHOGENESIS_OF_AN_EPITHELIAL_FOLD		11	0.610434	1.36644	0.160839	0.619788	1	541	tags=27%, list=4%, signal=28%	HeterovsU937	pos
															GO_GLIAL_CELL_APOPTOTIC_PROCESS	GO_GLIAL_CELL_APOPTOTIC_PROCESS		13	-0.556224	-1.27906	0.210896	0.619942	1	2742	tags=38%, list=20%, signal=48%	HeterovsU937	neg
															GO_NEGATIVE_REGULATION_OF_PEPTIDE_SECRETION	GO_NEGATIVE_REGULATION_OF_PEPTIDE_SECRETION		58	0.431648	1.36702	0.0815348	0.61997	1	641	tags=14%, list=5%, signal=14%	HeterovsU937	pos
															GO_EMBRYONIC_HEART_TUBE_DEVELOPMENT	GO_EMBRYONIC_HEART_TUBE_DEVELOPMENT		41	-0.438013	-1.2778	0.162437	0.619991	1	620	tags=12%, list=5%, signal=13%	HeterovsU937	neg
															GO_CENTROSOME_SEPARATION	GO_CENTROSOME_SEPARATION		12	0.590297	1.36316	0.153285	0.62002	1	1906	tags=50%, list=14%, signal=58%	HeterovsU937	pos
															GO_RESPONSE_TO_PROGESTERONE	GO_RESPONSE_TO_PROGESTERONE		26	0.560564	1.52109	0.0589744	0.620055	1	856	tags=15%, list=6%, signal=16%	HeterovsU937	pos
															GO_DRUG_METABOLIC_PROCESS	GO_DRUG_METABOLIC_PROCESS		15	-0.531629	-1.27988	0.19244	0.620093	1	1582	tags=33%, list=12%, signal=38%	HeterovsU937	neg
															GO_CYSTEINE_METABOLIC_PROCESS	GO_CYSTEINE_METABOLIC_PROCESS		10	-0.586128	-1.27436	0.19115	0.620216	1	2727	tags=40%, list=20%, signal=50%	HeterovsU937	neg
															GO_REGULATION_OF_MUSCLE_CELL_DIFFERENTIATION	GO_REGULATION_OF_MUSCLE_CELL_DIFFERENTIATION		96	0.395354	1.36756	0.0550964	0.620242	1	1267	tags=17%, list=9%, signal=18%	HeterovsU937	pos
															GO_METAPHASE_PLATE_CONGRESSION	GO_METAPHASE_PLATE_CONGRESSION		49	0.459742	1.63443	0.0131579	0.620322	1	4412	tags=49%, list=32%, signal=72%	HomovsU937	pos
															GO_LIPID_IMPORT_INTO_CELL	GO_LIPID_IMPORT_INTO_CELL		14	-0.55107	-1.27597	0.187611	0.620406	1	2492	tags=43%, list=18%, signal=52%	HeterovsU937	neg
															GO_PEPTIDYL_PROLINE_MODIFICATION	GO_PEPTIDYL_PROLINE_MODIFICATION		38	0.510303	1.51981	0.0569307	0.620511	1	216	tags=8%, list=2%, signal=8%	HeterovsU937	pos
															GO_INTESTINAL_ABSORPTION	GO_INTESTINAL_ABSORPTION		17	-0.530289	-1.27551	0.204082	0.620565	1	19	tags=6%, list=0%, signal=6%	HeterovsU937	neg
															GO_POLYSACCHARIDE_METABOLIC_PROCESS	GO_POLYSACCHARIDE_METABOLIC_PROCESS		69	-0.395102	-1.27719	0.130781	0.620622	1	1904	tags=20%, list=14%, signal=23%	HeterovsU937	neg
															GO_REGULATION_OF_ALPHA_BETA_T_CELL_DIFFERENTIATION	GO_REGULATION_OF_ALPHA_BETA_T_CELL_DIFFERENTIATION		44	-0.429006	-1.27801	0.141431	0.62064	1	1044	tags=16%, list=8%, signal=17%	HeterovsU937	neg
															GO_PIGMENT_CELL_DIFFERENTIATION	GO_PIGMENT_CELL_DIFFERENTIATION		23	-0.487108	-1.27674	0.179966	0.620687	1	545	tags=26%, list=4%, signal=27%	HeterovsU937	neg
															GO_REGULATION_OF_EPIDERMAL_CELL_DIFFERENTIATION	GO_REGULATION_OF_EPIDERMAL_CELL_DIFFERENTIATION		30	0.55102	1.51196	0.0559441	0.620954	1	640	tags=13%, list=5%, signal=14%	HeterovsU937	pos
															GO_REGULATION_OF_STRIATED_MUSCLE_CELL_DIFFERENTIATION	GO_REGULATION_OF_STRIATED_MUSCLE_CELL_DIFFERENTIATION		57	0.425201	1.36344	0.0779221	0.621061	1	1191	tags=21%, list=9%, signal=23%	HeterovsU937	pos
															GO_SMOOTH_MUSCLE_TISSUE_DEVELOPMENT	GO_SMOOTH_MUSCLE_TISSUE_DEVELOPMENT		11	0.617678	1.59123	0.0483384	0.621135	1	1144	tags=27%, list=8%, signal=30%	HomovsU937	pos
															GO_AUTONOMIC_NERVOUS_SYSTEM_DEVELOPMENT	GO_AUTONOMIC_NERVOUS_SYSTEM_DEVELOPMENT		17	-0.515719	-1.27323	0.195382	0.621154	1	2086	tags=41%, list=15%, signal=49%	HeterovsU937	neg
															GO_SENSORY_PERCEPTION_OF_SMELL	GO_SENSORY_PERCEPTION_OF_SMELL		11	-0.575576	-1.27198	0.198305	0.621171	1	2171	tags=45%, list=16%, signal=54%	HeterovsU937	neg
															GO_POSITIVE_REGULATION_OF_RESPONSE_TO_CYTOKINE_STIMULUS	GO_POSITIVE_REGULATION_OF_RESPONSE_TO_CYTOKINE_STIMULUS		39	0.549659	1.67155	0.00985222	0.621213	1	1069	tags=15%, list=8%, signal=17%	HeterovsU937	pos
															GO_REGULATION_OF_PROTEIN_LOCALIZATION_TO_ENDOSOME	GO_REGULATION_OF_PROTEIN_LOCALIZATION_TO_ENDOSOME		10	-0.600887	-1.27359	0.1875	0.621298	1	2902	tags=50%, list=21%, signal=64%	HeterovsU937	neg
															GO_LYMPHOCYTE_MIGRATION	GO_LYMPHOCYTE_MIGRATION		50	-0.422906	-1.27151	0.149758	0.621316	1	1468	tags=20%, list=11%, signal=22%	HeterovsU937	neg
															GO_POSITIVE_REGULATION_OF_LEUKOCYTE_CELL_CELL_ADHESION	GO_POSITIVE_REGULATION_OF_LEUKOCYTE_CELL_CELL_ADHESION		150	-0.363245	-1.27817	0.0810811	0.621409	1	1551	tags=21%, list=11%, signal=23%	HeterovsU937	neg
															GO_SYNAPTIC_VESICLE_LOCALIZATION	GO_SYNAPTIC_VESICLE_LOCALIZATION		38	0.473165	1.36774	0.0854922	0.621555	1	452	tags=11%, list=3%, signal=11%	HeterovsU937	pos
															GO_NEGATIVE_REGULATION_OF_DNA_BINDING_TRANSCRIPTION_FACTOR_ACTIVITY	GO_NEGATIVE_REGULATION_OF_DNA_BINDING_TRANSCRIPTION_FACTOR_ACTIVITY		111	-0.374416	-1.27101	0.114516	0.621568	1	1704	tags=19%, list=13%, signal=21%	HeterovsU937	neg
															GO_DOPAMINE_METABOLIC_PROCESS	GO_DOPAMINE_METABOLIC_PROCESS		15	0.572694	1.5622	0.0418118	0.621644	1	379	tags=20%, list=3%, signal=21%	HomovsU937	pos
															GO_LYSOSOMAL_TRANSPORT	GO_LYSOSOMAL_TRANSPORT		88	0.401438	1.37429	0.0638889	0.621665	1	1815	tags=17%, list=13%, signal=20%	HeterovsU937	pos
															GO_MITOTIC_CHROMOSOME_CONDENSATION	GO_MITOTIC_CHROMOSOME_CONDENSATION		13	0.704968	1.66498	0.05	0.621748	1	2766	tags=69%, list=20%, signal=87%	HeterovsU937	pos
															GO_POSITIVE_REGULATION_OF_JNK_CASCADE	GO_POSITIVE_REGULATION_OF_JNK_CASCADE		99	-0.378081	-1.27206	0.121069	0.622122	1	1106	tags=13%, list=8%, signal=14%	HeterovsU937	neg
															GO_POSITIVE_REGULATION_OF_BLOOD_CIRCULATION	GO_POSITIVE_REGULATION_OF_BLOOD_CIRCULATION		33	-0.457681	-1.27244	0.139803	0.62226	1	1798	tags=18%, list=13%, signal=21%	HeterovsU937	neg
															GO_REGULATION_OF_SYNAPTIC_VESICLE_RECYCLING	GO_REGULATION_OF_SYNAPTIC_VESICLE_RECYCLING		20	0.545838	1.37336	0.144254	0.622465	1	641	tags=25%, list=5%, signal=26%	HeterovsU937	pos
															GO_SPLEEN_DEVELOPMENT	GO_SPLEEN_DEVELOPMENT		20	0.53531	1.37596	0.124688	0.622623	1	1042	tags=20%, list=8%, signal=22%	HeterovsU937	pos
															GO_POSITIVE_REGULATION_OF_NUCLEOTIDE_BIOSYNTHETIC_PROCESS	GO_POSITIVE_REGULATION_OF_NUCLEOTIDE_BIOSYNTHETIC_PROCESS		13	-0.671215	-1.40683	0.119253	0.622648	1	1152	tags=31%, list=8%, signal=34%	HomovsHetero	neg
															GO_MICROTUBULE_DEPOLYMERIZATION	GO_MICROTUBULE_DEPOLYMERIZATION		33	0.480977	1.37452	0.113475	0.622871	1	2037	tags=24%, list=15%, signal=28%	HeterovsU937	pos
															GO_POSITIVE_REGULATION_OF_PROTEIN_TYROSINE_KINASE_ACTIVITY	GO_POSITIVE_REGULATION_OF_PROTEIN_TYROSINE_KINASE_ACTIVITY		32	-0.58612	-1.40971	0.0893782	0.622973	1	431	tags=19%, list=3%, signal=19%	HomovsHetero	neg
															GO_POSITIVE_REGULATION_OF_MITOCHONDRIAL_MEMBRANE_POTENTIAL	GO_POSITIVE_REGULATION_OF_MITOCHONDRIAL_MEMBRANE_POTENTIAL		10	0.61893	1.37049	0.157773	0.622998	1	2150	tags=50%, list=16%, signal=59%	HeterovsU937	pos
															GO_P38MAPK_CASCADE	GO_P38MAPK_CASCADE		34	0.478965	1.36786	0.113953	0.62307	1	636	tags=15%, list=5%, signal=15%	HeterovsU937	pos
															GO_POSITIVE_REGULATION_OF_COLLAGEN_METABOLIC_PROCESS	GO_POSITIVE_REGULATION_OF_COLLAGEN_METABOLIC_PROCESS	Details ...	12	0.797182	1.82568	0.00458716	0.623112	0.997	944	tags=25%, list=7%, signal=27%	HeterovsU937	pos
															GO_PROSTATE_GLAND_DEVELOPMENT	GO_PROSTATE_GLAND_DEVELOPMENT		26	0.496875	1.36853	0.125964	0.623153	1	2123	tags=35%, list=16%, signal=41%	HeterovsU937	pos
															GO_SKIN_EPIDERMIS_DEVELOPMENT	GO_SKIN_EPIDERMIS_DEVELOPMENT		49	-0.539871	-1.44553	0.0449173	0.623253	1	1303	tags=22%, list=10%, signal=25%	HomovsU937	neg
															GO_MODULATION_BY_HOST_OF_SYMBIONT_PROCESS	GO_MODULATION_BY_HOST_OF_SYMBIONT_PROCESS		39	0.455686	1.37505	0.0934343	0.623331	1	1558	tags=15%, list=11%, signal=17%	HeterovsU937	pos
															GO_APOPTOTIC_MITOCHONDRIAL_CHANGES	GO_APOPTOTIC_MITOCHONDRIAL_CHANGES		86	0.396171	1.36899	0.0540541	0.623575	1	1502	tags=16%, list=11%, signal=18%	HeterovsU937	pos
															GO_SKIN_DEVELOPMENT	GO_SKIN_DEVELOPMENT		130	0.37378	1.37094	0.0445682	0.623583	1	1118	tags=15%, list=8%, signal=17%	HeterovsU937	pos
															GO_POSITIVE_REGULATION_OF_STRIATED_MUSCLE_CELL_APOPTOTIC_PROCESS	GO_POSITIVE_REGULATION_OF_STRIATED_MUSCLE_CELL_APOPTOTIC_PROCESS		10	-0.702449	-1.43622	0.0886628	0.62366	1	1817	tags=30%, list=13%, signal=35%	HomovsU937	neg
															GO_SALIVARY_GLAND_DEVELOPMENT	GO_SALIVARY_GLAND_DEVELOPMENT		26	0.564441	1.51228	0.0714286	0.623701	1	845	tags=31%, list=6%, signal=33%	HeterovsU937	pos
															GO_HISTONE_H3_K27_METHYLATION	GO_HISTONE_H3_K27_METHYLATION		13	0.57525	1.32937	0.182482	0.623925	1	2515	tags=69%, list=19%, signal=85%	HeterovsU937	pos
															GO_PHOTOTRANSDUCTION_VISIBLE_LIGHT	GO_PHOTOTRANSDUCTION_VISIBLE_LIGHT		17	-0.649068	-1.40693	0.0982019	0.624092	1	1422	tags=29%, list=10%, signal=33%	HomovsHetero	neg
															GO_STEM_CELL_DIVISION	GO_STEM_CELL_DIVISION		31	0.472868	1.32982	0.127182	0.624184	1	2123	tags=29%, list=16%, signal=34%	HeterovsU937	pos
															GO_REGULATION_OF_RESPONSE_TO_WOUNDING	GO_REGULATION_OF_RESPONSE_TO_WOUNDING		99	-0.521094	-1.40902	0.0252101	0.624254	1	1257	tags=20%, list=9%, signal=22%	HomovsHetero	neg
															GO_NEURAL_PRECURSOR_CELL_PROLIFERATION	GO_NEURAL_PRECURSOR_CELL_PROLIFERATION		91	-0.52562	-1.40985	0.0344828	0.624284	1	1287	tags=15%, list=9%, signal=17%	HomovsHetero	neg
															GO_REGULATION_OF_SYSTEMIC_ARTERIAL_BLOOD_PRESSURE_BY_RENIN_ANGIOTENSIN	GO_REGULATION_OF_SYSTEMIC_ARTERIAL_BLOOD_PRESSURE_BY_RENIN_ANGIOTENSIN		11	-0.689511	-1.40774	0.103976	0.624288	1	1124	tags=27%, list=8%, signal=30%	HomovsHetero	neg
															GO_CHROMOSOME_CONDENSATION	GO_CHROMOSOME_CONDENSATION		24	0.517259	1.618	0.0186047	0.624312	1	4491	tags=71%, list=33%, signal=106%	HomovsU937	pos
															GO_DNA_INTEGRITY_CHECKPOINT	GO_DNA_INTEGRITY_CHECKPOINT		138	0.374642	1.36939	0.0480226	0.624313	1	4358	tags=46%, list=32%, signal=68%	HeterovsU937	pos
															GO_AMELOGENESIS	GO_AMELOGENESIS		11	0.719845	1.67521	0.0439815	0.62448	1	1461	tags=45%, list=11%, signal=51%	HeterovsU937	pos
															GO_COMPLEMENT_ACTIVATION	GO_COMPLEMENT_ACTIVATION		29	0.479706	1.37126	0.111905	0.624548	1	735	tags=31%, list=5%, signal=33%	HeterovsU937	pos
															GO_POSITIVE_REGULATION_OF_ION_TRANSMEMBRANE_TRANSPORT	GO_POSITIVE_REGULATION_OF_ION_TRANSMEMBRANE_TRANSPORT		82	-0.498491	-1.43656	0.0308031	0.624577	1	2634	tags=33%, list=19%, signal=41%	HomovsU937	neg
															GO_CALCIUM_ION_REGULATED_EXOCYTOSIS	GO_CALCIUM_ION_REGULATED_EXOCYTOSIS		38	0.445385	1.32499	0.166667	0.624648	1	1315	tags=24%, list=10%, signal=26%	HeterovsU937	pos
															GO_NEGATIVE_REGULATION_OF_BLOOD_VESSEL_DIAMETER	GO_NEGATIVE_REGULATION_OF_BLOOD_VESSEL_DIAMETER		35	-0.578855	-1.40853	0.0738499	0.624691	1	1124	tags=20%, list=8%, signal=22%	HomovsHetero	neg
															GO_APPENDAGE_MORPHOGENESIS	GO_APPENDAGE_MORPHOGENESIS		77	-0.500656	-1.43707	0.0364807	0.624704	1	1330	tags=16%, list=10%, signal=17%	HomovsU937	neg
															GO_POSITIVE_REGULATION_OF_STEM_CELL_PROLIFERATION	GO_POSITIVE_REGULATION_OF_STEM_CELL_PROLIFERATION	Details ...	22	0.553016	1.64264	0.0122951	0.624773	1	447	tags=18%, list=3%, signal=19%	HomovsU937	pos
															GO_CORTICAL_CYTOSKELETON_ORGANIZATION	GO_CORTICAL_CYTOSKELETON_ORGANIZATION		47	0.432313	1.33014	0.106329	0.624839	1	2583	tags=34%, list=19%, signal=42%	HeterovsU937	pos
															GO_POSITIVE_REGULATION_OF_SMOOTH_MUSCLE_CONTRACTION	GO_POSITIVE_REGULATION_OF_SMOOTH_MUSCLE_CONTRACTION		13	-0.668223	-1.44397	0.0835777	0.62509	1	1067	tags=23%, list=8%, signal=25%	HomovsU937	neg
															GO_REGULATION_OF_SYNAPTIC_TRANSMISSION_GLUTAMATERGIC	GO_REGULATION_OF_SYNAPTIC_TRANSMISSION_GLUTAMATERGIC		34	-0.560542	-1.44342	0.06125	0.625198	1	2473	tags=38%, list=18%, signal=47%	HomovsU937	neg
															GO_POSITIVE_REGULATION_OF_TRANSFORMING_GROWTH_FACTOR_BETA_PRODUCTION	GO_POSITIVE_REGULATION_OF_TRANSFORMING_GROWTH_FACTOR_BETA_PRODUCTION		10	-0.723402	-1.4071	0.109756	0.62528	1	2522	tags=60%, list=19%, signal=74%	HomovsHetero	neg
															GO_RESPONSE_TO_UV_B	GO_RESPONSE_TO_UV_B		12	0.582804	1.37157	0.159036	0.625536	1	1042	tags=17%, list=8%, signal=18%	HeterovsU937	pos
															GO_NEGATIVE_REGULATION_OF_VIRAL_GENOME_REPLICATION	GO_NEGATIVE_REGULATION_OF_VIRAL_GENOME_REPLICATION		38	0.45384	1.33103	0.135266	0.625674	1	1131	tags=21%, list=8%, signal=23%	HeterovsU937	pos
															GO_ANATOMICAL_STRUCTURE_ARRANGEMENT	GO_ANATOMICAL_STRUCTURE_ARRANGEMENT		12	-0.686822	-1.40787	0.0995608	0.625722	1	936	tags=33%, list=7%, signal=36%	HomovsHetero	neg
															GO_PRODUCTION_OF_SIRNA_INVOLVED_IN_RNA_INTERFERENCE	GO_PRODUCTION_OF_SIRNA_INVOLVED_IN_RNA_INTERFERENCE		10	0.602164	1.32514	0.188889	0.625808	1	2260	tags=30%, list=17%, signal=36%	HeterovsU937	pos
															GO_REGULATION_OF_PROTEIN_LOCALIZATION_TO_CELL_SURFACE	GO_REGULATION_OF_PROTEIN_LOCALIZATION_TO_CELL_SURFACE		32	0.457152	1.3257	0.147132	0.625914	1	2504	tags=34%, list=18%, signal=42%	HeterovsU937	pos
															GO_STARTLE_RESPONSE	GO_STARTLE_RESPONSE		14	0.560828	1.33263	0.189448	0.625977	1	147	tags=14%, list=1%, signal=14%	HeterovsU937	pos
															GO_I_KAPPAB_PHOSPHORYLATION	GO_I_KAPPAB_PHOSPHORYLATION		14	0.588217	1.53886	0.0524476	0.626022	1	1591	tags=43%, list=12%, signal=48%	HomovsU937	pos
															GO_PROTEIN_DNA_COMPLEX_SUBUNIT_ORGANIZATION	GO_PROTEIN_DNA_COMPLEX_SUBUNIT_ORGANIZATION		167	0.336813	1.46917	0	0.658763	1	4338	tags=49%, list=32%, signal=70%	HomovsU937	pos
															GO_NEGATIVE_REGULATION_OF_SIGNAL_TRANSDUCTION_BY_P53_CLASS_MEDIATOR	GO_NEGATIVE_REGULATION_OF_SIGNAL_TRANSDUCTION_BY_P53_CLASS_MEDIATOR		22	0.503992	1.33145	0.159145	0.626127	1	14	tags=5%, list=0%, signal=5%	HeterovsU937	pos
															GO_LYMPH_VESSEL_MORPHOGENESIS	GO_LYMPH_VESSEL_MORPHOGENESIS		11	-0.683568	-1.40988	0.106984	0.62613	1	391	tags=18%, list=3%, signal=19%	HomovsHetero	neg
															GO_REGULATION_OF_ESTABLISHMENT_OF_PROTEIN_LOCALIZATION_TO_MITOCHONDRION	GO_REGULATION_OF_ESTABLISHMENT_OF_PROTEIN_LOCALIZATION_TO_MITOCHONDRION		62	0.416438	1.33315	0.106173	0.626203	1	1042	tags=11%, list=8%, signal=12%	HeterovsU937	pos
															GO_REGULATION_OF_OXIDATIVE_STRESS_INDUCED_CELL_DEATH	GO_REGULATION_OF_OXIDATIVE_STRESS_INDUCED_CELL_DEATH		45	0.430363	1.3302	0.106599	0.626265	1	1907	tags=24%, list=14%, signal=28%	HeterovsU937	pos
															GO_DORSAL_VENTRAL_NEURAL_TUBE_PATTERNING	GO_DORSAL_VENTRAL_NEURAL_TUBE_PATTERNING		18	-0.643731	-1.41023	0.0880759	0.626332	1	2795	tags=33%, list=21%, signal=42%	HomovsHetero	neg
															GO_REGULATION_OF_LEUKOCYTE_MIGRATION	GO_REGULATION_OF_LEUKOCYTE_MIGRATION		109	-0.3747	-1.26777	0.107544	0.626374	1	2033	tags=29%, list=15%, signal=34%	HeterovsU937	neg
															GO_REGULATION_OF_INTEGRIN_MEDIATED_SIGNALING_PATHWAY	GO_REGULATION_OF_INTEGRIN_MEDIATED_SIGNALING_PATHWAY		10	-0.713565	-1.4023	0.108955	0.626417	1	888	tags=20%, list=7%, signal=21%	HomovsHetero	neg
															GO_POSITIVE_REGULATION_OF_DENDRITIC_SPINE_MORPHOGENESIS	GO_POSITIVE_REGULATION_OF_DENDRITIC_SPINE_MORPHOGENESIS		17	-0.515671	-1.26728	0.187713	0.626631	1	2603	tags=35%, list=19%, signal=44%	HeterovsU937	neg
															GO_HISTONE_H3_K4_METHYLATION	GO_HISTONE_H3_K4_METHYLATION		41	0.44605	1.33175	0.126761	0.626829	1	4050	tags=59%, list=30%, signal=83%	HeterovsU937	pos
															GO_G0_TO_G1_TRANSITION	GO_G0_TO_G1_TRANSITION		37	0.475198	1.62011	0.00995025	0.626837	1	4448	tags=70%, list=33%, signal=104%	HomovsU937	pos
															GO_RECEPTOR_LOCALIZATION_TO_SYNAPSE	GO_RECEPTOR_LOCALIZATION_TO_SYNAPSE		32	-0.57133	-1.44197	0.0677541	0.626894	1	1454	tags=31%, list=11%, signal=35%	HomovsU937	neg
															GO_MICROTUBULE_ORGANIZING_CENTER_ORGANIZATION	GO_MICROTUBULE_ORGANIZING_CENTER_ORGANIZATION		112	0.373826	1.32589	0.0697051	0.62696	1	2786	tags=33%, list=21%, signal=41%	HeterovsU937	pos
															GO_RESPONSE_TO_MANGANESE_ION	GO_RESPONSE_TO_MANGANESE_ION	Details ...	12	0.653832	1.69727	0.0470219	0.627004	1	156	tags=17%, list=1%, signal=17%	HomovsU937	pos
															GO_NEGATIVE_REGULATION_OF_CYTOSKELETON_ORGANIZATION	GO_NEGATIVE_REGULATION_OF_CYTOSKELETON_ORGANIZATION		107	0.379693	1.32699	0.0824742	0.627014	1	258	tags=5%, list=2%, signal=5%	HeterovsU937	pos
															GO_CENTRAL_NERVOUS_SYSTEM_PROJECTION_NEURON_AXONOGENESIS	GO_CENTRAL_NERVOUS_SYSTEM_PROJECTION_NEURON_AXONOGENESIS		17	-0.634583	-1.44139	0.0759494	0.62702	1	842	tags=24%, list=6%, signal=25%	HomovsU937	neg
															GO_ENDOTHELIUM_DEVELOPMENT	GO_ENDOTHELIUM_DEVELOPMENT		72	-0.503771	-1.43031	0.0353478	0.627032	1	1437	tags=19%, list=11%, signal=22%	HomovsU937	neg
															GO_POSITIVE_REGULATION_OF_ERK1_AND_ERK2_CASCADE	GO_POSITIVE_REGULATION_OF_ERK1_AND_ERK2_CASCADE		93	-0.496719	-1.43709	0.0355987	0.627093	1	1735	tags=22%, list=13%, signal=24%	HomovsU937	neg
															GO_RESPONSE_TO_ACTIVITY	GO_RESPONSE_TO_ACTIVITY		47	-0.533713	-1.4441	0.0510689	0.6271	1	743	tags=9%, list=5%, signal=9%	HomovsU937	neg
															GO_NEGATIVE_REGULATION_OF_DENDRITIC_SPINE_DEVELOPMENT	GO_NEGATIVE_REGULATION_OF_DENDRITIC_SPINE_DEVELOPMENT		10	-0.704769	-1.42923	0.0917293	0.627193	1	2343	tags=60%, list=17%, signal=72%	HomovsU937	neg
															GO_ESTABLISHMENT_OF_SPINDLE_ORIENTATION	GO_ESTABLISHMENT_OF_SPINDLE_ORIENTATION	Details ...	28	0.520853	1.64517	0.0239234	0.627212	1	2566	tags=36%, list=19%, signal=44%	HomovsU937	pos
															GO_CENTROSOME_SEPARATION	GO_CENTROSOME_SEPARATION		12	0.627111	1.59476	0.0330033	0.62742	1	2441	tags=50%, list=18%, signal=61%	HomovsU937	pos
															GO_REGULATION_OF_SYSTEMIC_ARTERIAL_BLOOD_PRESSURE_BY_RENIN_ANGIOTENSIN	GO_REGULATION_OF_SYSTEMIC_ARTERIAL_BLOOD_PRESSURE_BY_RENIN_ANGIOTENSIN		11	-0.55393	-1.26779	0.193202	0.627534	1	1770	tags=36%, list=13%, signal=42%	HeterovsU937	neg
															GO_OSTEOBLAST_PROLIFERATION	GO_OSTEOBLAST_PROLIFERATION		15	0.544002	1.33319	0.170483	0.627683	1	1900	tags=40%, list=14%, signal=46%	HeterovsU937	pos
															GO_POSITIVE_REGULATION_OF_B_CELL_ACTIVATION	GO_POSITIVE_REGULATION_OF_B_CELL_ACTIVATION		54	0.414036	1.32616	0.100962	0.627728	1	2230	tags=33%, list=16%, signal=40%	HeterovsU937	pos
															GO_AMINE_CATABOLIC_PROCESS	GO_AMINE_CATABOLIC_PROCESS		10	-0.589162	-1.26854	0.202873	0.627733	1	812	tags=40%, list=6%, signal=43%	HeterovsU937	neg
															GO_NEGATIVE_REGULATION_OF_CELL_MIGRATION_INVOLVED_IN_SPROUTING_ANGIOGENESIS	GO_NEGATIVE_REGULATION_OF_CELL_MIGRATION_INVOLVED_IN_SPROUTING_ANGIOGENESIS		10	-0.712167	-1.40159	0.127132	0.627733	1	1481	tags=30%, list=11%, signal=34%	HomovsHetero	neg
															GO_NEGATIVE_REGULATION_OF_NATURAL_KILLER_CELL_MEDIATED_IMMUNITY	GO_NEGATIVE_REGULATION_OF_NATURAL_KILLER_CELL_MEDIATED_IMMUNITY	Details ...	11	0.695352	1.68556	0.0122324	0.627739	1	1009	tags=45%, list=7%, signal=49%	HomovsHetero	pos
															GO_REGULATION_OF_ENDOPLASMIC_RETICULUM_STRESS_INDUCED_INTRINSIC_APOPTOTIC_SIGNALING_PATHWAY	GO_REGULATION_OF_ENDOPLASMIC_RETICULUM_STRESS_INDUCED_INTRINSIC_APOPTOTIC_SIGNALING_PATHWAY		22	0.524682	1.56269	0.0365854	0.627812	1	553	tags=14%, list=4%, signal=14%	HomovsU937	pos
															GO_LEUKOCYTE_PROLIFERATION	GO_LEUKOCYTE_PROLIFERATION		182	-0.350968	-1.26646	0.0619048	0.627853	1	1940	tags=26%, list=14%, signal=30%	HeterovsU937	neg
															GO_NEGATIVE_REGULATION_OF_INTERLEUKIN_2_PRODUCTION	GO_NEGATIVE_REGULATION_OF_INTERLEUKIN_2_PRODUCTION		15	-0.656999	-1.4024	0.0959097	0.627867	1	7	tags=7%, list=0%, signal=7%	HomovsHetero	neg
															GO_NEGATIVE_REGULATION_OF_WOUND_HEALING	GO_NEGATIVE_REGULATION_OF_WOUND_HEALING		36	-0.558798	-1.44007	0.0384139	0.627954	1	1873	tags=36%, list=14%, signal=42%	HomovsU937	neg
															GO_NEGATIVE_REGULATION_OF_CELL_SUBSTRATE_ADHESION	GO_NEGATIVE_REGULATION_OF_CELL_SUBSTRATE_ADHESION		35	-0.447859	-1.26799	0.166667	0.628134	1	2013	tags=26%, list=15%, signal=30%	HeterovsU937	neg
															GO_DEVELOPMENTAL_INDUCTION	GO_DEVELOPMENTAL_INDUCTION	Details ...	14	0.619842	1.6808	0.0311419	0.628146	1	1543	tags=36%, list=11%, signal=40%	HomovsU937	pos
															GO_MAMMARY_GLAND_EPITHELIUM_DEVELOPMENT	GO_MAMMARY_GLAND_EPITHELIUM_DEVELOPMENT		45	0.444964	1.32707	0.128852	0.628346	1	706	tags=13%, list=5%, signal=14%	HeterovsU937	pos
															GO_LOCOMOTOR_RHYTHM	GO_LOCOMOTOR_RHYTHM	Details ...	12	0.669198	1.66932	0.0407523	0.628375	1	4024	tags=75%, list=30%, signal=106%	HomovsU937	pos
															GO_HISTONE_H4_K20_METHYLATION	GO_HISTONE_H4_K20_METHYLATION		10	0.644024	1.55786	0.0621622	0.628539	1	3129	tags=60%, list=23%, signal=78%	HomovsU937	pos
															GO_METANEPHRIC_NEPHRON_DEVELOPMENT	GO_METANEPHRIC_NEPHRON_DEVELOPMENT		12	-0.67464	-1.43781	0.0944767	0.628548	1	2253	tags=58%, list=17%, signal=70%	HomovsU937	neg
															GO_HEART_FORMATION	GO_HEART_FORMATION		11	0.623309	1.53611	0.059375	0.628637	1	3869	tags=82%, list=28%, signal=114%	HomovsU937	pos
															GO_REGULATION_OF_PROTEIN_DEPOLYMERIZATION	GO_REGULATION_OF_PROTEIN_DEPOLYMERIZATION		64	0.413047	1.33338	0.107692	0.628753	1	129	tags=5%, list=1%, signal=5%	HeterovsU937	pos
															GO_NEGATIVE_REGULATION_OF_CYTOKINE_PRODUCTION_INVOLVED_IN_INFLAMMATORY_RESPONSE	GO_NEGATIVE_REGULATION_OF_CYTOKINE_PRODUCTION_INVOLVED_IN_INFLAMMATORY_RESPONSE	Details ...	12	0.669601	1.6968	0.00634921	0.628784	1	868	tags=33%, list=6%, signal=36%	HomovsHetero	pos
															GO_PULMONARY_VALVE_DEVELOPMENT	GO_PULMONARY_VALVE_DEVELOPMENT		11	-0.689835	-1.42937	0.104566	0.628886	1	615	tags=27%, list=5%, signal=29%	HomovsU937	neg
															GO_RESPONSE_TO_AMINE	GO_RESPONSE_TO_AMINE		29	-0.591765	-1.40506	0.0770202	0.628988	1	2205	tags=38%, list=16%, signal=45%	HomovsHetero	neg
															GO_MITOTIC_G1_S_TRANSITION_CHECKPOINT	GO_MITOTIC_G1_S_TRANSITION_CHECKPOINT		56	0.431837	1.34988	0.0920398	0.629	1	1038	tags=14%, list=8%, signal=15%	HeterovsU937	pos
															GO_POSITIVE_REGULATION_OF_COAGULATION	GO_POSITIVE_REGULATION_OF_COAGULATION		15	-0.657102	-1.40293	0.113604	0.62906	1	1516	tags=33%, list=11%, signal=37%	HomovsHetero	neg
															GO_EXTRACELLULAR_MATRIX_DISASSEMBLY	GO_EXTRACELLULAR_MATRIX_DISASSEMBLY		45	-0.547055	-1.43719	0.0570749	0.629096	1	1921	tags=29%, list=14%, signal=34%	HomovsU937	neg
															GO_LIMBIC_SYSTEM_DEVELOPMENT	GO_LIMBIC_SYSTEM_DEVELOPMENT		61	-0.534696	-1.39959	0.0615901	0.629153	1	1456	tags=20%, list=11%, signal=22%	HomovsHetero	neg
															GO_REGULATION_OF_EXTRACELLULAR_MATRIX_ORGANIZATION	GO_REGULATION_OF_EXTRACELLULAR_MATRIX_ORGANIZATION		27	-0.600368	-1.40459	0.0826873	0.629162	1	1215	tags=30%, list=9%, signal=32%	HomovsHetero	neg
															GO_NEGATIVE_REGULATION_OF_ADAPTIVE_IMMUNE_RESPONSE	GO_NEGATIVE_REGULATION_OF_ADAPTIVE_IMMUNE_RESPONSE		29	-0.572201	-1.43036	0.0669145	0.629202	1	216	tags=10%, list=2%, signal=10%	HomovsU937	neg
															GO_REGULATION_OF_EXTRACELLULAR_MATRIX_ASSEMBLY	GO_REGULATION_OF_EXTRACELLULAR_MATRIX_ASSEMBLY		11	-0.680227	-1.44203	0.0914454	0.62921	1	971	tags=27%, list=7%, signal=29%	HomovsU937	neg
															GO_VASODILATION	GO_VASODILATION		16	-0.633215	-1.42273	0.116312	0.629421	1	1691	tags=44%, list=12%, signal=50%	HomovsU937	neg
															GO_OUTFLOW_TRACT_MORPHOGENESIS	GO_OUTFLOW_TRACT_MORPHOGENESIS		41	-0.554383	-1.40326	0.0725327	0.629442	1	1346	tags=22%, list=10%, signal=24%	HomovsHetero	neg
															GO_CATECHOLAMINE_SECRETION	GO_CATECHOLAMINE_SECRETION		19	0.550514	1.34843	0.12987	0.629448	1	641	tags=26%, list=5%, signal=28%	HeterovsU937	pos
															GO_VESICLE_MEDIATED_TRANSPORT_IN_SYNAPSE	GO_VESICLE_MEDIATED_TRANSPORT_IN_SYNAPSE		134	0.36543	1.34412	0.0537634	0.629462	1	733	tags=13%, list=5%, signal=13%	HeterovsU937	pos
															GO_POSITIVE_REGULATION_OF_CELL_DIVISION	GO_POSITIVE_REGULATION_OF_CELL_DIVISION		49	0.422051	1.33374	0.0992736	0.629465	1	1813	tags=31%, list=13%, signal=35%	HeterovsU937	pos
															GO_ENDOCRINE_HORMONE_SECRETION	GO_ENDOCRINE_HORMONE_SECRETION		21	-0.626064	-1.40244	0.100271	0.629494	1	473	tags=14%, list=3%, signal=15%	HomovsHetero	neg
															GO_NEGATIVE_REGULATION_OF_TRANSMEMBRANE_TRANSPORT	GO_NEGATIVE_REGULATION_OF_TRANSMEMBRANE_TRANSPORT		72	0.398448	1.33618	0.0888325	0.62956	1	636	tags=8%, list=5%, signal=9%	HeterovsU937	pos
															GO_POSITIVE_REGULATION_OF_INSULIN_SECRETION_INVOLVED_IN_CELLULAR_RESPONSE_TO_GLUCOSE_STIMULUS	GO_POSITIVE_REGULATION_OF_INSULIN_SECRETION_INVOLVED_IN_CELLULAR_RESPONSE_TO_GLUCOSE_STIMULUS		21	-0.598406	-1.42174	0.0881972	0.629629	1	211	tags=10%, list=2%, signal=10%	HomovsU937	neg
															GO_REGULATION_OF_POTASSIUM_ION_TRANSPORT	GO_REGULATION_OF_POTASSIUM_ION_TRANSPORT		50	0.439024	1.3428	0.0845771	0.629666	1	583	tags=12%, list=4%, signal=12%	HeterovsU937	pos
															GO_ORGANIC_HYDROXY_COMPOUND_TRANSPORT	GO_ORGANIC_HYDROXY_COMPOUND_TRANSPORT		121	0.371499	1.33488	0.0755208	0.62972	1	973	tags=17%, list=7%, signal=19%	HeterovsU937	pos
															GO_ENDOTHELIAL_CELL_MIGRATION	GO_ENDOTHELIAL_CELL_MIGRATION		130	-0.507743	-1.40026	0.024974	0.629906	1	1516	tags=17%, list=11%, signal=19%	HomovsHetero	neg
															GO_KINETOCHORE_ASSEMBLY	GO_KINETOCHORE_ASSEMBLY		14	0.550129	1.34891	0.171216	0.629935	1	5093	tags=79%, list=37%, signal=126%	HeterovsU937	pos
															GO_VENTRICULAR_CARDIAC_MUSCLE_CELL_ACTION_POTENTIAL	GO_VENTRICULAR_CARDIAC_MUSCLE_CELL_ACTION_POTENTIAL		21	-0.609974	-1.44021	0.0745257	0.629949	1	951	tags=33%, list=7%, signal=36%	HomovsU937	neg
															GO_UV_PROTECTION	GO_UV_PROTECTION		10	0.61866	1.34151	0.18427	0.629969	1	1930	tags=30%, list=14%, signal=35%	HeterovsU937	pos
															GO_CELL_CELL_JUNCTION_ASSEMBLY	GO_CELL_CELL_JUNCTION_ASSEMBLY		79	-0.525017	-1.39855	0.0502183	0.630061	1	1046	tags=19%, list=8%, signal=20%	HomovsHetero	neg
															GO_REGULATION_OF_PROTEIN_TARGETING_TO_MITOCHONDRION	GO_REGULATION_OF_PROTEIN_TARGETING_TO_MITOCHONDRION		38	0.46274	1.34327	0.120735	0.63007	1	930	tags=8%, list=7%, signal=8%	HeterovsU937	pos
															GO_REGULATION_OF_MESENCHYMAL_CELL_PROLIFERATION	GO_REGULATION_OF_MESENCHYMAL_CELL_PROLIFERATION	Details ...	21	0.656551	1.96903	0.00816326	0.630083	0.738	549	tags=29%, list=4%, signal=30%	HomovsU937	pos
															GO_AMINE_CATABOLIC_PROCESS	GO_AMINE_CATABOLIC_PROCESS		10	-0.711415	-1.40395	0.117284	0.630096	1	147	tags=20%, list=1%, signal=20%	HomovsHetero	neg
															GO_ICOSANOID_BIOSYNTHETIC_PROCESS	GO_ICOSANOID_BIOSYNTHETIC_PROCESS	Details ...	24	0.534387	1.65454	0.0276498	0.630172	1	2194	tags=46%, list=16%, signal=55%	HomovsU937	pos
															GO_PRI_MIRNA_TRANSCRIPTION_BY_RNA_POLYMERASE_II	GO_PRI_MIRNA_TRANSCRIPTION_BY_RNA_POLYMERASE_II		40	0.461446	1.34508	0.118451	0.630189	1	668	tags=20%, list=5%, signal=21%	HeterovsU937	pos
															GO_CELL_RECOGNITION	GO_CELL_RECOGNITION		69	-0.537747	-1.39975	0.045354	0.630309	1	2303	tags=32%, list=17%, signal=38%	HomovsHetero	neg
															GO_POSTSYNAPTIC_NEUROTRANSMITTER_RECEPTOR_INTERNALIZATION	GO_POSTSYNAPTIC_NEUROTRANSMITTER_RECEPTOR_INTERNALIZATION		14	0.538119	1.33403	0.16476	0.630387	1	513	tags=21%, list=4%, signal=22%	HeterovsU937	pos
															GO_RESPONSE_TO_KETONE	GO_RESPONSE_TO_KETONE		115	0.367202	1.34189	0.0614973	0.630468	1	1752	tags=16%, list=13%, signal=18%	HeterovsU937	pos
															GO_NUCLEOLAR_LARGE_RRNA_TRANSCRIPTION_BY_RNA_POLYMERASE_I	GO_NUCLEOLAR_LARGE_RRNA_TRANSCRIPTION_BY_RNA_POLYMERASE_I		14	0.564057	1.34614	0.171021	0.630621	1	4308	tags=64%, list=32%, signal=94%	HeterovsU937	pos
															GO_VENTRICULAR_CARDIAC_MUSCLE_CELL_MEMBRANE_REPOLARIZATION	GO_VENTRICULAR_CARDIAC_MUSCLE_CELL_MEMBRANE_REPOLARIZATION		15	0.555671	1.33761	0.169412	0.630636	1	522	tags=13%, list=4%, signal=14%	HeterovsU937	pos
															GO_REGULATION_OF_HEART_RATE	GO_REGULATION_OF_HEART_RATE		45	-0.525771	-1.42199	0.068477	0.630639	1	1351	tags=27%, list=10%, signal=30%	HomovsU937	neg
															GO_NEGATIVE_REGULATION_OF_MRNA_PROCESSING	GO_NEGATIVE_REGULATION_OF_MRNA_PROCESSING		29	0.482968	1.34068	0.13285	0.630678	1	4352	tags=48%, list=32%, signal=71%	HeterovsU937	pos
															GO_HEART_PROCESS	GO_HEART_PROCESS		139	-0.361902	-1.26515	0.104938	0.630715	1	1905	tags=24%, list=14%, signal=28%	HeterovsU937	neg
															GO_OLIGODENDROCYTE_DIFFERENTIATION	GO_OLIGODENDROCYTE_DIFFERENTIATION		61	0.412417	1.33818	0.097561	0.630716	1	801	tags=15%, list=6%, signal=16%	HeterovsU937	pos
															GO_NUCLEOSIDE_MONOPHOSPHATE_PHOSPHORYLATION	GO_NUCLEOSIDE_MONOPHOSPHATE_PHOSPHORYLATION		11	0.597769	1.33513	0.171642	0.630722	1	2054	tags=45%, list=15%, signal=54%	HeterovsU937	pos
															GO_REGULATION_OF_NEUROTRANSMITTER_TRANSPORT	GO_REGULATION_OF_NEUROTRANSMITTER_TRANSPORT		72	0.408834	1.34426	0.0881612	0.630734	1	721	tags=13%, list=5%, signal=13%	HeterovsU937	pos
															GO_LEUKOCYTE_HOMEOSTASIS	GO_LEUKOCYTE_HOMEOSTASIS		65	0.41389	1.33633	0.0854922	0.63081	1	1969	tags=25%, list=14%, signal=29%	HeterovsU937	pos
															GO_POSITIVE_REGULATION_OF_DEFENSE_RESPONSE_TO_VIRUS_BY_HOST	GO_POSITIVE_REGULATION_OF_DEFENSE_RESPONSE_TO_VIRUS_BY_HOST		21	-0.609405	-1.43782	0.0704787	0.631003	1	2510	tags=43%, list=18%, signal=52%	HomovsU937	neg
															GO_MUSCLE_CONTRACTION	GO_MUSCLE_CONTRACTION		175	-0.499932	-1.39709	0.0101215	0.631062	1	1207	tags=15%, list=9%, signal=17%	HomovsHetero	neg
															GO_RELEASE_OF_SEQUESTERED_CALCIUM_ION_INTO_CYTOSOL_BY_ENDOPLASMIC_RETICULUM	GO_RELEASE_OF_SEQUESTERED_CALCIUM_ION_INTO_CYTOSOL_BY_ENDOPLASMIC_RETICULUM		16	-0.636524	-1.42786	0.0968188	0.63115	1	1213	tags=25%, list=9%, signal=27%	HomovsU937	neg
															GO_NEGATIVE_REGULATION_OF_STRESS_ACTIVATED_PROTEIN_KINASE_SIGNALING_CASCADE	GO_NEGATIVE_REGULATION_OF_STRESS_ACTIVATED_PROTEIN_KINASE_SIGNALING_CASCADE		33	0.459891	1.32096	0.147343	0.631168	1	1927	tags=24%, list=14%, signal=28%	HeterovsU937	pos
															GO_REGULATION_OF_ANIMAL_ORGAN_FORMATION	GO_REGULATION_OF_ANIMAL_ORGAN_FORMATION		13	0.559648	1.33923	0.15	0.631201	1	840	tags=31%, list=6%, signal=33%	HeterovsU937	pos
															GO_PHOSPHOLIPASE_C_ACTIVATING_G_PROTEIN_COUPLED_RECEPTOR_SIGNALING_PATHWAY	GO_PHOSPHOLIPASE_C_ACTIVATING_G_PROTEIN_COUPLED_RECEPTOR_SIGNALING_PATHWAY		35	-0.580405	-1.40039	0.085396	0.631213	1	1124	tags=34%, list=8%, signal=37%	HomovsHetero	neg
															GO_NEGATIVE_REGULATION_OF_ACTIN_FILAMENT_BUNDLE_ASSEMBLY	GO_NEGATIVE_REGULATION_OF_ACTIN_FILAMENT_BUNDLE_ASSEMBLY		17	-0.646266	-1.40329	0.0990237	0.631227	1	303	tags=12%, list=2%, signal=12%	HomovsHetero	neg
															GO_T_CELL_MEDIATED_IMMUNITY	GO_T_CELL_MEDIATED_IMMUNITY		68	-0.509182	-1.4228	0.047138	0.631352	1	2329	tags=37%, list=17%, signal=44%	HomovsU937	neg
															GO_RESPONSE_TO_PURINE_CONTAINING_COMPOUND	GO_RESPONSE_TO_PURINE_CONTAINING_COMPOUND		88	-0.496866	-1.43041	0.0327511	0.631362	1	2715	tags=31%, list=20%, signal=38%	HomovsU937	neg
															GO_POSITIVE_REGULATION_OF_RESPONSE_TO_WOUNDING	GO_POSITIVE_REGULATION_OF_RESPONSE_TO_WOUNDING		37	-0.572523	-1.39866	0.0811808	0.631399	1	1516	tags=24%, list=11%, signal=27%	HomovsHetero	neg
															GO_POSITIVE_REGULATION_OF_CYTOSKELETON_ORGANIZATION	GO_POSITIVE_REGULATION_OF_CYTOSKELETON_ORGANIZATION		158	0.357963	1.34515	0.0246154	0.63172	1	1558	tags=14%, list=11%, signal=16%	HeterovsU937	pos
															GO_EMBRYONIC_SKELETAL_SYSTEM_MORPHOGENESIS	GO_EMBRYONIC_SKELETAL_SYSTEM_MORPHOGENESIS		46	0.453523	1.347	0.0815789	0.631734	1	1605	tags=28%, list=12%, signal=32%	HeterovsU937	pos
															GO_NEGATIVE_REGULATION_OF_PROTEIN_LOCALIZATION_TO_NUCLEUS	GO_NEGATIVE_REGULATION_OF_PROTEIN_LOCALIZATION_TO_NUCLEUS		20	0.518599	1.34632	0.171498	0.63183	1	375	tags=10%, list=3%, signal=10%	HeterovsU937	pos
															GO_CELLULAR_RESPONSE_TO_EXOGENOUS_DSRNA	GO_CELLULAR_RESPONSE_TO_EXOGENOUS_DSRNA		12	0.574937	1.33652	0.17381	0.63188	1	59	tags=8%, list=0%, signal=8%	HeterovsU937	pos
															GO_REGULATION_OF_MICROTUBULE_BASED_PROCESS	GO_REGULATION_OF_MICROTUBULE_BASED_PROCESS		169	0.352411	1.33838	0.041543	0.631893	1	2752	tags=27%, list=20%, signal=34%	HeterovsU937	pos
															GO_REGULATION_OF_SISTER_CHROMATID_SEGREGATION	GO_REGULATION_OF_SISTER_CHROMATID_SEGREGATION		70	0.406571	1.53291	0.0163934	0.631955	1	3259	tags=34%, list=24%, signal=45%	HomovsU937	pos
															GO_ICOSANOID_METABOLIC_PROCESS	GO_ICOSANOID_METABOLIC_PROCESS		49	0.43123	1.53916	0.0275862	0.632047	1	2393	tags=43%, list=18%, signal=52%	HomovsU937	pos
															GO_POSITIVE_REGULATION_OF_SYNAPTIC_TRANSMISSION_GLUTAMATERGIC	GO_POSITIVE_REGULATION_OF_SYNAPTIC_TRANSMISSION_GLUTAMATERGIC		15	-0.645679	-1.43814	0.0909091	0.632056	1	425	tags=20%, list=3%, signal=21%	HomovsU937	neg
															GO_HISTONE_H3_K14_ACETYLATION	GO_HISTONE_H3_K14_ACETYLATION		11	0.594757	1.52844	0.0714286	0.632192	1	5406	tags=82%, list=40%, signal=136%	HomovsU937	pos
															GO_NEGATIVE_REGULATION_OF_INTRINSIC_APOPTOTIC_SIGNALING_PATHWAY_BY_P53_CLASS_MEDIATOR	GO_NEGATIVE_REGULATION_OF_INTRINSIC_APOPTOTIC_SIGNALING_PATHWAY_BY_P53_CLASS_MEDIATOR		14	-0.677384	-1.39725	0.111276	0.632201	1	303	tags=14%, list=2%, signal=15%	HomovsHetero	neg
															GO_ESTABLISHMENT_OF_MITOTIC_SPINDLE_LOCALIZATION	GO_ESTABLISHMENT_OF_MITOTIC_SPINDLE_LOCALIZATION		28	0.485975	1.33943	0.155502	0.632353	1	2486	tags=39%, list=18%, signal=48%	HeterovsU937	pos
															GO_MYELOID_LEUKOCYTE_CYTOKINE_PRODUCTION	GO_MYELOID_LEUKOCYTE_CYTOKINE_PRODUCTION		24	-0.602696	-1.42304	0.0766074	0.632578	1	615	tags=17%, list=5%, signal=17%	HomovsU937	neg
															GO_ATTACHMENT_OF_MITOTIC_SPINDLE_MICROTUBULES_TO_KINETOCHORE	GO_ATTACHMENT_OF_MITOTIC_SPINDLE_MICROTUBULES_TO_KINETOCHORE		14	0.560436	1.32097	0.191964	0.632686	1	2929	tags=43%, list=22%, signal=55%	HeterovsU937	pos
															GO_REPLICATION_FORK_PROCESSING	GO_REPLICATION_FORK_PROCESSING		29	0.495177	1.56347	0.0424528	0.632843	1	3177	tags=48%, list=23%, signal=63%	HomovsU937	pos
															GO_NEGATIVE_REGULATION_OF_COAGULATION	GO_NEGATIVE_REGULATION_OF_COAGULATION		25	-0.602685	-1.39749	0.0948052	0.633039	1	1257	tags=32%, list=9%, signal=35%	HomovsHetero	neg
															GO_NEGATIVE_REGULATION_OF_HORMONE_SECRETION	GO_NEGATIVE_REGULATION_OF_HORMONE_SECRETION		31	0.467702	1.3214	0.145985	0.633125	1	636	tags=10%, list=5%, signal=10%	HeterovsU937	pos
															GO_REGULATION_OF_CELL_KILLING	GO_REGULATION_OF_CELL_KILLING	Details ...	48	-0.611108	-1.82648	0	0.397026	0.995	1486	tags=29%, list=11%, signal=33%	HeterovsU937	neg
															GO_NEUROMUSCULAR_JUNCTION_DEVELOPMENT	GO_NEUROMUSCULAR_JUNCTION_DEVELOPMENT		33	-0.452723	-1.26187	0.171769	0.633297	1	2416	tags=24%, list=18%, signal=29%	HeterovsU937	neg
															GO_CELL_VOLUME_HOMEOSTASIS	GO_CELL_VOLUME_HOMEOSTASIS		20	-0.494459	-1.26387	0.196694	0.633331	1	1763	tags=30%, list=13%, signal=34%	HeterovsU937	neg
															GO_POSITIVE_REGULATION_OF_MUSCLE_CELL_APOPTOTIC_PROCESS	GO_POSITIVE_REGULATION_OF_MUSCLE_CELL_APOPTOTIC_PROCESS		20	-0.500272	-1.26263	0.174359	0.633449	1	2567	tags=35%, list=19%, signal=43%	HeterovsU937	neg
															GO_KERATINOCYTE_PROLIFERATION	GO_KERATINOCYTE_PROLIFERATION		19	-0.606483	-1.42684	0.0854139	0.633481	1	191	tags=16%, list=1%, signal=16%	HomovsU937	neg
															GO_HINDLIMB_MORPHOGENESIS	GO_HINDLIMB_MORPHOGENESIS		18	0.672322	1.67565	0.0220049	0.633587	1	302	tags=22%, list=2%, signal=23%	HeterovsU937	pos
															GO_RETINOL_METABOLIC_PROCESS	GO_RETINOL_METABOLIC_PROCESS		17	-0.635665	-1.43041	0.0865922	0.633759	1	1286	tags=29%, list=9%, signal=32%	HomovsU937	neg
															GO_ETHANOL_METABOLIC_PROCESS	GO_ETHANOL_METABOLIC_PROCESS		10	-0.687078	-1.42375	0.102639	0.633883	1	878	tags=30%, list=6%, signal=32%	HomovsU937	neg
															GO_REGULATION_OF_PHOSPHOLIPASE_ACTIVITY	GO_REGULATION_OF_PHOSPHOLIPASE_ACTIVITY		35	-0.449875	-1.26282	0.179357	0.634045	1	1630	tags=31%, list=12%, signal=36%	HeterovsU937	neg
															GO_ISOPRENOID_BIOSYNTHETIC_PROCESS	GO_ISOPRENOID_BIOSYNTHETIC_PROCESS		20	-0.51389	-1.26321	0.19469	0.634098	1	1490	tags=25%, list=11%, signal=28%	HeterovsU937	neg
															GO_REGULATION_OF_T_CELL_MEDIATED_CYTOTOXICITY	GO_REGULATION_OF_T_CELL_MEDIATED_CYTOTOXICITY		19	-0.614134	-1.43341	0.0911528	0.634142	1	2888	tags=53%, list=21%, signal=67%	HomovsU937	neg
															GO_REGULATION_OF_CALCIUM_ION_TRANSPORT_INTO_CYTOSOL	GO_REGULATION_OF_CALCIUM_ION_TRANSPORT_INTO_CYTOSOL		52	-0.532708	-1.43823	0.0491803	0.634154	1	2593	tags=38%, list=19%, signal=47%	HomovsU937	neg
															GO_CELLULAR_MODIFIED_AMINO_ACID_BIOSYNTHETIC_PROCESS	GO_CELLULAR_MODIFIED_AMINO_ACID_BIOSYNTHETIC_PROCESS		35	-0.448554	-1.2612	0.169911	0.634178	1	1598	tags=20%, list=12%, signal=23%	HeterovsU937	neg
															GO_GLOMERULAR_EPITHELIAL_CELL_DIFFERENTIATION	GO_GLOMERULAR_EPITHELIAL_CELL_DIFFERENTIATION		10	-0.694932	-1.42317	0.115269	0.634356	1	241	tags=20%, list=2%, signal=20%	HomovsU937	neg
															GO_GLUCOSAMINE_CONTAINING_COMPOUND_METABOLIC_PROCESS	GO_GLUCOSAMINE_CONTAINING_COMPOUND_METABOLIC_PROCESS		16	-0.637961	-1.4241	0.101551	0.63446	1	1023	tags=31%, list=8%, signal=34%	HomovsU937	neg
															GO_RELAXATION_OF_MUSCLE	GO_RELAXATION_OF_MUSCLE		15	-0.528927	-1.26187	0.213087	0.63447	1	1949	tags=47%, list=14%, signal=54%	HeterovsU937	neg
															GO_POSITIVE_REGULATION_OF_INSULIN_SECRETION_INVOLVED_IN_CELLULAR_RESPONSE_TO_GLUCOSE_STIMULUS	GO_POSITIVE_REGULATION_OF_INSULIN_SECRETION_INVOLVED_IN_CELLULAR_RESPONSE_TO_GLUCOSE_STIMULUS		21	-0.486518	-1.26063	0.17734	0.634705	1	3231	tags=33%, list=24%, signal=44%	HeterovsU937	neg
															GO_CEREBRAL_CORTEX_RADIALLY_ORIENTED_CELL_MIGRATION	GO_CEREBRAL_CORTEX_RADIALLY_ORIENTED_CELL_MIGRATION		21	0.50628	1.50444	0.0539419	0.634755	1	1486	tags=29%, list=11%, signal=32%	HomovsU937	pos
															GO_MITOTIC_G2_M_TRANSITION_CHECKPOINT	GO_MITOTIC_G2_M_TRANSITION_CHECKPOINT	Details ...	27	0.529913	1.66061	0.0205761	0.634798	1	3578	tags=63%, list=26%, signal=85%	HomovsU937	pos
															GO_REGULATION_OF_CD4_POSITIVE_ALPHA_BETA_T_CELL_ACTIVATION	GO_REGULATION_OF_CD4_POSITIVE_ALPHA_BETA_T_CELL_ACTIVATION		42	-0.433548	-1.26013	0.150685	0.634962	1	2604	tags=29%, list=19%, signal=35%	HeterovsU937	neg
															GO_POSITIVE_REGULATION_OF_STRIATED_MUSCLE_CELL_DIFFERENTIATION	GO_POSITIVE_REGULATION_OF_STRIATED_MUSCLE_CELL_DIFFERENTIATION		31	0.467555	1.31897	0.136585	0.634969	1	1191	tags=23%, list=9%, signal=25%	HeterovsU937	pos
															GO_PROTEIN_LOCALIZATION_TO_POSTSYNAPSE	GO_PROTEIN_LOCALIZATION_TO_POSTSYNAPSE		26	-0.580701	-1.43066	0.0744125	0.635005	1	2329	tags=38%, list=17%, signal=46%	HomovsU937	neg
															GO_DNA_CATABOLIC_PROCESS_ENDONUCLEOLYTIC	GO_DNA_CATABOLIC_PROCESS_ENDONUCLEOLYTIC	Details ...	22	0.557087	1.68959	0.00896861	0.635006	1	3830	tags=59%, list=28%, signal=82%	HomovsHetero	pos
															GO_DOPAMINERGIC_NEURON_DIFFERENTIATION	GO_DOPAMINERGIC_NEURON_DIFFERENTIATION		16	0.540192	1.31781	0.175309	0.635048	1	840	tags=19%, list=6%, signal=20%	HeterovsU937	pos
															GO_NEUROTRANSMITTER_TRANSPORT	GO_NEUROTRANSMITTER_TRANSPORT		127	0.361873	1.3183	0.0674157	0.635282	1	740	tags=13%, list=5%, signal=14%	HeterovsU937	pos
															GO_CELLULAR_RESPONSE_TO_ARSENIC_CONTAINING_SUBSTANCE	GO_CELLULAR_RESPONSE_TO_ARSENIC_CONTAINING_SUBSTANCE		18	-0.624796	-1.42439	0.0917942	0.635346	1	8	tags=6%, list=0%, signal=6%	HomovsU937	neg
															GO_MEIOTIC_CHROMOSOME_SEGREGATION	GO_MEIOTIC_CHROMOSOME_SEGREGATION		60	0.400621	1.31422	0.10101	0.635376	1	3262	tags=42%, list=24%, signal=55%	HeterovsU937	pos
															GO_NEGATIVE_REGULATION_OF_CELL_SUBSTRATE_ADHESION	GO_NEGATIVE_REGULATION_OF_CELL_SUBSTRATE_ADHESION		35	-0.558643	-1.43254	0.0645933	0.635753	1	369	tags=14%, list=3%, signal=15%	HomovsU937	neg
															GO_REGULATION_OF_EXIT_FROM_MITOSIS	GO_REGULATION_OF_EXIT_FROM_MITOSIS		14	-0.660888	-1.3956	0.107402	0.635936	1	446	tags=14%, list=3%, signal=15%	HomovsHetero	neg
															GO_MULTI_MULTICELLULAR_ORGANISM_PROCESS	GO_MULTI_MULTICELLULAR_ORGANISM_PROCESS		115	-0.365892	-1.25418	0.11746	0.63599	1	1815	tags=25%, list=13%, signal=29%	HeterovsU937	neg
															GO_CALCINEURIN_MEDIATED_SIGNALING	GO_CALCINEURIN_MEDIATED_SIGNALING		28	-0.461353	-1.25454	0.202509	0.636084	1	928	tags=18%, list=7%, signal=19%	HeterovsU937	neg
															GO_RECEPTOR_RECYCLING	GO_RECEPTOR_RECYCLING		23	-0.593123	-1.42471	0.0839895	0.636132	1	4	tags=4%, list=0%, signal=4%	HomovsU937	neg
															GO_DNA_DEPENDENT_DNA_REPLICATION_MAINTENANCE_OF_FIDELITY	GO_DNA_DEPENDENT_DNA_REPLICATION_MAINTENANCE_OF_FIDELITY		37	0.452973	1.54008	0.0307692	0.636278	1	3381	tags=49%, list=25%, signal=65%	HomovsU937	pos
															GO_CATECHOLAMINE_METABOLIC_PROCESS	GO_CATECHOLAMINE_METABOLIC_PROCESS		21	0.50031	1.31271	0.178744	0.636287	1	633	tags=14%, list=5%, signal=15%	HeterovsU937	pos
															GO_REGULATION_OF_MITOCHONDRIAL_MEMBRANE_POTENTIAL	GO_REGULATION_OF_MITOCHONDRIAL_MEMBRANE_POTENTIAL		56	0.408633	1.31556	0.115764	0.636338	1	2150	tags=21%, list=16%, signal=25%	HeterovsU937	pos
															GO_NUCLEOSOME_ASSEMBLY	GO_NUCLEOSOME_ASSEMBLY		52	0.417557	1.52931	0.0185185	0.636405	1	3831	tags=52%, list=28%, signal=72%	HomovsU937	pos
															GO_NEGATIVE_REGULATION_OF_PRODUCTION_OF_MIRNAS_INVOLVED_IN_GENE_SILENCING_BY_MIRNA	GO_NEGATIVE_REGULATION_OF_PRODUCTION_OF_MIRNAS_INVOLVED_IN_GENE_SILENCING_BY_MIRNA		10	0.651441	1.59491	0.0529412	0.636409	1	2560	tags=40%, list=19%, signal=49%	HomovsU937	pos
															GO_GLIAL_CELL_MIGRATION	GO_GLIAL_CELL_MIGRATION		34	-0.549998	-1.43189	0.0782396	0.636474	1	1093	tags=26%, list=8%, signal=29%	HomovsU937	neg
															GO_G0_TO_G1_TRANSITION	GO_G0_TO_G1_TRANSITION	Details ...	37	0.498859	1.67301	0.00526316	0.636541	1	3128	tags=46%, list=23%, signal=60%	HomovsHetero	pos
															GO_MITOCHONDRIAL_FUSION	GO_MITOCHONDRIAL_FUSION		23	0.514622	1.31593	0.17907	0.636809	1	14	tags=4%, list=0%, signal=4%	HeterovsU937	pos
															GO_REGULATION_OF_MITOCHONDRIAL_FISSION	GO_REGULATION_OF_MITOCHONDRIAL_FISSION		22	0.497094	1.31426	0.178313	0.636817	1	1097	tags=18%, list=8%, signal=20%	HeterovsU937	pos
															GO_LIPOPROTEIN_BIOSYNTHETIC_PROCESS	GO_LIPOPROTEIN_BIOSYNTHETIC_PROCESS		75	-0.386545	-1.25345	0.150087	0.636864	1	2128	tags=23%, list=16%, signal=27%	HeterovsU937	neg
															GO_MITOCHONDRIAL_ELECTRON_TRANSPORT_NADH_TO_UBIQUINONE	GO_MITOCHONDRIAL_ELECTRON_TRANSPORT_NADH_TO_UBIQUINONE		45	-0.420948	-1.25457	0.162162	0.637131	1	4236	tags=38%, list=31%, signal=55%	HeterovsU937	neg
															GO_LYMPHOCYTE_MEDIATED_IMMUNITY	GO_LYMPHOCYTE_MEDIATED_IMMUNITY		163	-0.472057	-1.43072	0.018711	0.637165	1	2329	tags=28%, list=17%, signal=34%	HomovsU937	neg
															GO_EPIDERMIS_DEVELOPMENT	GO_EPIDERMIS_DEVELOPMENT		156	-0.474964	-1.4312	0.00939457	0.637364	1	1853	tags=23%, list=14%, signal=26%	HomovsU937	neg
															GO_REGULATION_OF_CYTOSOLIC_CALCIUM_ION_CONCENTRATION	GO_REGULATION_OF_CYTOSOLIC_CALCIUM_ION_CONCENTRATION	Details ...	152	-0.484163	-1.72906	0	0.285626	1	2817	tags=40%, list=21%, signal=50%	HeterovsU937	neg
															GO_NEGATIVE_REGULATION_OF_CELL_JUNCTION_ASSEMBLY	GO_NEGATIVE_REGULATION_OF_CELL_JUNCTION_ASSEMBLY		17	0.532234	1.30834	0.175355	0.6376	1	636	tags=12%, list=5%, signal=12%	HeterovsU937	pos
															GO_REGULATION_OF_TUMOR_NECROSIS_FACTOR_MEDIATED_SIGNALING_PATHWAY	GO_REGULATION_OF_TUMOR_NECROSIS_FACTOR_MEDIATED_SIGNALING_PATHWAY		44	0.444036	1.31273	0.127877	0.637752	1	1335	tags=18%, list=10%, signal=20%	HeterovsU937	pos
															GO_POSITIVE_REGULATION_OF_OSSIFICATION	GO_POSITIVE_REGULATION_OF_OSSIFICATION		50	-0.548885	-1.39434	0.0771001	0.637804	1	1906	tags=32%, list=14%, signal=37%	HomovsHetero	neg
															GO_IMPORT_INTO_CELL	GO_IMPORT_INTO_CELL		119	0.367024	1.31613	0.0752089	0.637821	1	513	tags=8%, list=4%, signal=9%	HeterovsU937	pos
															GO_MYELOID_CELL_APOPTOTIC_PROCESS	GO_MYELOID_CELL_APOPTOTIC_PROCESS		21	0.494101	1.30768	0.185366	0.637855	1	10	tags=5%, list=0%, signal=5%	HeterovsU937	pos
															GO_RESPONSE_TO_BMP	GO_RESPONSE_TO_BMP		81	-0.387265	-1.25872	0.13099	0.637895	1	2418	tags=28%, list=18%, signal=34%	HeterovsU937	neg
															GO_RESPONSE_TO_SALT_STRESS	GO_RESPONSE_TO_SALT_STRESS		14	-0.525157	-1.25669	0.201739	0.637947	1	2062	tags=29%, list=15%, signal=34%	HeterovsU937	neg
															GO_REGULATION_OF_RELEASE_OF_CYTOCHROME_C_FROM_MITOCHONDRIA	GO_REGULATION_OF_RELEASE_OF_CYTOCHROME_C_FROM_MITOCHONDRIA		32	0.455827	1.50528	0.042654	0.637965	1	1458	tags=25%, list=11%, signal=28%	HomovsU937	pos
															GO_CELLULAR_MONOVALENT_INORGANIC_CATION_HOMEOSTASIS	GO_CELLULAR_MONOVALENT_INORGANIC_CATION_HOMEOSTASIS		69	-0.39859	-1.25469	0.14975	0.637965	1	1770	tags=17%, list=13%, signal=20%	HeterovsU937	neg
															GO_NEGATIVE_REGULATION_OF_PROTEOLYSIS	GO_NEGATIVE_REGULATION_OF_PROTEOLYSIS		187	-0.473158	-1.42479	0.00203874	0.638062	1	1921	tags=24%, list=14%, signal=27%	HomovsU937	neg
															GO_REGULATION_OF_NATURAL_KILLER_CELL_ACTIVATION	GO_REGULATION_OF_NATURAL_KILLER_CELL_ACTIVATION		19	0.554997	1.56436	0.0544747	0.638124	1	739	tags=26%, list=5%, signal=28%	HomovsU937	pos
															GO_DNA_DEPENDENT_DNA_REPLICATION_MAINTENANCE_OF_FIDELITY	GO_DNA_DEPENDENT_DNA_REPLICATION_MAINTENANCE_OF_FIDELITY		37	0.457829	1.31429	0.127451	0.638254	1	3516	tags=51%, list=26%, signal=69%	HeterovsU937	pos
															GO_POSITIVE_REGULATION_OF_PATTERN_RECOGNITION_RECEPTOR_SIGNALING_PATHWAY	GO_POSITIVE_REGULATION_OF_PATTERN_RECOGNITION_RECEPTOR_SIGNALING_PATHWAY		22	0.503365	1.51268	0.0658436	0.638268	1	553	tags=18%, list=4%, signal=19%	HomovsU937	pos
															GO_NEGATIVE_REGULATION_OF_SIGNAL_TRANSDUCTION_IN_ABSENCE_OF_LIGAND	GO_NEGATIVE_REGULATION_OF_SIGNAL_TRANSDUCTION_IN_ABSENCE_OF_LIGAND		20	0.534335	1.50701	0.0592885	0.638514	1	1458	tags=40%, list=11%, signal=45%	HomovsU937	pos
															GO_PROGRAMMED_NECROTIC_CELL_DEATH	GO_PROGRAMMED_NECROTIC_CELL_DEATH		29	-0.46474	-1.25803	0.175973	0.638671	1	2666	tags=28%, list=20%, signal=34%	HeterovsU937	neg
															GO_ASTROCYTE_ACTIVATION	GO_ASTROCYTE_ACTIVATION		13	0.610794	1.56647	0.0607029	0.638736	1	302	tags=23%, list=2%, signal=24%	HomovsU937	pos
															GO_SEMAPHORIN_PLEXIN_SIGNALING_PATHWAY	GO_SEMAPHORIN_PLEXIN_SIGNALING_PATHWAY		28	-0.570249	-1.41778	0.085213	0.638739	1	1009	tags=29%, list=7%, signal=31%	HomovsU937	neg
															GO_TRABECULA_MORPHOGENESIS	GO_TRABECULA_MORPHOGENESIS		26	0.491374	1.30845	0.160804	0.638791	1	2160	tags=31%, list=16%, signal=37%	HeterovsU937	pos
															GO_REGULATION_OF_ENDOTHELIAL_CELL_MIGRATION	GO_REGULATION_OF_ENDOTHELIAL_CELL_MIGRATION		100	-0.492165	-1.41823	0.0251917	0.638797	1	899	tags=12%, list=7%, signal=13%	HomovsU937	neg
															GO_RESPONSE_TO_CADMIUM_ION	GO_RESPONSE_TO_CADMIUM_ION		46	0.44856	1.59966	0.0121212	0.638867	1	1725	tags=20%, list=13%, signal=22%	HomovsU937	pos
															GO_ALPHA_LINOLENIC_ACID_METABOLIC_PROCESS	GO_ALPHA_LINOLENIC_ACID_METABOLIC_PROCESS		11	-0.557809	-1.25476	0.225694	0.638939	1	856	tags=18%, list=6%, signal=19%	HeterovsU937	neg
															GO_NEGATIVE_REGULATION_OF_INTERLEUKIN_8_PRODUCTION	GO_NEGATIVE_REGULATION_OF_INTERLEUKIN_8_PRODUCTION		13	-0.675178	-1.39449	0.107193	0.638942	1	1366	tags=31%, list=10%, signal=34%	HomovsHetero	neg
															GO_REGULATION_OF_REGULATED_SECRETORY_PATHWAY	GO_REGULATION_OF_REGULATED_SECRETORY_PATHWAY		101	-0.376992	-1.25596	0.119048	0.638946	1	2431	tags=28%, list=18%, signal=34%	HeterovsU937	neg
															GO_RESPONSE_TO_INTERLEUKIN_1	GO_RESPONSE_TO_INTERLEUKIN_1		135	-0.359676	-1.25675	0.0967239	0.638977	1	1803	tags=19%, list=13%, signal=21%	HeterovsU937	neg
															GO_PURINE_CONTAINING_COMPOUND_CATABOLIC_PROCESS	GO_PURINE_CONTAINING_COMPOUND_CATABOLIC_PROCESS		34	-0.556916	-1.42507	0.0667506	0.639094	1	3650	tags=50%, list=27%, signal=68%	HomovsU937	neg
															GO_REGULATION_OF_PLASMA_LIPOPROTEIN_PARTICLE_LEVELS	GO_REGULATION_OF_PLASMA_LIPOPROTEIN_PARTICLE_LEVELS		55	-0.518192	-1.41863	0.0567787	0.639249	1	1691	tags=18%, list=12%, signal=21%	HomovsU937	neg
															GO_POST_EMBRYONIC_ANIMAL_ORGAN_DEVELOPMENT	GO_POST_EMBRYONIC_ANIMAL_ORGAN_DEVELOPMENT		11	-0.685893	-1.41906	0.0980966	0.639595	1	2777	tags=55%, list=20%, signal=69%	HomovsU937	neg
															GO_REGULATION_OF_B_CELL_RECEPTOR_SIGNALING_PATHWAY	GO_REGULATION_OF_B_CELL_RECEPTOR_SIGNALING_PATHWAY		19	-0.502368	-1.2573	0.193878	0.639756	1	1594	tags=32%, list=12%, signal=36%	HeterovsU937	neg
															GO_REGULATION_OF_PHOSPHATASE_ACTIVITY	GO_REGULATION_OF_PHOSPHATASE_ACTIVITY		121	-0.365918	-1.25488	0.106796	0.639775	1	1603	tags=15%, list=12%, signal=17%	HeterovsU937	neg
															GO_POSITIVE_REGULATION_OF_MITOTIC_CELL_CYCLE	GO_POSITIVE_REGULATION_OF_MITOTIC_CELL_CYCLE		122	0.361057	1.30857	0.0704607	0.639936	1	1983	tags=22%, list=15%, signal=26%	HeterovsU937	pos
															GO_RESPONSE_TO_ELECTRICAL_STIMULUS	GO_RESPONSE_TO_ELECTRICAL_STIMULUS		23	-0.482159	-1.25678	0.19211	0.640067	1	2445	tags=43%, list=18%, signal=53%	HeterovsU937	neg
															GO_GLUCOSAMINE_CONTAINING_COMPOUND_METABOLIC_PROCESS	GO_GLUCOSAMINE_CONTAINING_COMPOUND_METABOLIC_PROCESS		16	-0.521827	-1.25516	0.216123	0.640159	1	2847	tags=56%, list=21%, signal=71%	HeterovsU937	neg
															GO_APOPTOTIC_PROCESS_INVOLVED_IN_MORPHOGENESIS	GO_APOPTOTIC_PROCESS_INVOLVED_IN_MORPHOGENESIS		14	0.549349	1.31007	0.183623	0.640514	1	2456	tags=36%, list=18%, signal=44%	HeterovsU937	pos
															GO_NEGATIVE_REGULATION_OF_ENDOPLASMIC_RETICULUM_STRESS_INDUCED_INTRINSIC_APOPTOTIC_SIGNALING_PATHWAY	GO_NEGATIVE_REGULATION_OF_ENDOPLASMIC_RETICULUM_STRESS_INDUCED_INTRINSIC_APOPTOTIC_SIGNALING_PATHWAY		14	0.569577	1.54083	0.0590164	0.640602	1	2691	tags=36%, list=20%, signal=44%	HomovsU937	pos
															GO_ENDOCARDIAL_CUSHION_DEVELOPMENT	GO_ENDOCARDIAL_CUSHION_DEVELOPMENT		23	-0.619179	-1.3933	0.0949285	0.640767	1	1198	tags=30%, list=9%, signal=33%	HomovsHetero	neg
															GO_FORMATION_OF_EXTRACHROMOSOMAL_CIRCULAR_DNA	GO_FORMATION_OF_EXTRACHROMOSOMAL_CIRCULAR_DNA		13	0.572859	1.55221	0.0676923	0.640797	1	387	tags=15%, list=3%, signal=16%	HomovsU937	pos
															GO_NEGATIVE_REGULATION_OF_MRNA_SPLICING_VIA_SPLICEOSOME	GO_NEGATIVE_REGULATION_OF_MRNA_SPLICING_VIA_SPLICEOSOME		20	0.517622	1.57335	0.0409836	0.641001	1	3664	tags=55%, list=27%, signal=75%	HomovsU937	pos
															GO_GLIAL_CELL_ACTIVATION	GO_GLIAL_CELL_ACTIVATION	Details ...	33	0.514865	1.65531	0.00961539	0.641257	1	379	tags=24%, list=3%, signal=25%	HomovsU937	pos
															GO_NEGATIVE_REGULATION_OF_SINGLE_STRANDED_VIRAL_RNA_REPLICATION_VIA_DOUBLE_STRANDED_DNA_INTERMEDIATE	GO_NEGATIVE_REGULATION_OF_SINGLE_STRANDED_VIRAL_RNA_REPLICATION_VIA_DOUBLE_STRANDED_DNA_INTERMEDIATE		10	0.591989	1.30859	0.209877	0.641411	1	2778	tags=50%, list=20%, signal=63%	HeterovsU937	pos
															GO_POSITIVE_REGULATION_OF_MITOCHONDRION_ORGANIZATION	GO_POSITIVE_REGULATION_OF_MITOCHONDRION_ORGANIZATION		97	0.371946	1.31028	0.0966057	0.641428	1	1097	tags=8%, list=8%, signal=9%	HeterovsU937	pos
															GO_PROTEIN_DEPOLYMERIZATION	GO_PROTEIN_DEPOLYMERIZATION		84	0.383412	1.30909	0.0808625	0.641623	1	2037	tags=23%, list=15%, signal=26%	HeterovsU937	pos
															GO_CHONDROCYTE_DIFFERENTIATION	GO_CHONDROCYTE_DIFFERENTIATION		59	-0.503389	-1.40785	0.0676605	0.641791	1	2189	tags=22%, list=16%, signal=26%	HomovsU937	neg
															GO_REGULATION_OF_SYNAPSE_ASSEMBLY	GO_REGULATION_OF_SYNAPSE_ASSEMBLY		46	0.432793	1.30498	0.137592	0.641927	1	1091	tags=20%, list=8%, signal=21%	HeterovsU937	pos
															GO_CELL_CHEMOTAXIS	GO_CELL_CHEMOTAXIS		141	-0.471136	-1.41454	0.0125261	0.642021	1	1471	tags=24%, list=11%, signal=27%	HomovsU937	neg
															GO_TYPE_B_PANCREATIC_CELL_DEVELOPMENT	GO_TYPE_B_PANCREATIC_CELL_DEVELOPMENT		13	-0.653635	-1.40826	0.100295	0.642043	1	1492	tags=23%, list=11%, signal=26%	HomovsU937	neg
															GO_REGULATION_OF_EXOSOMAL_SECRETION	GO_REGULATION_OF_EXOSOMAL_SECRETION		13	0.585456	1.52333	0.05919	0.64216	1	156	tags=15%, list=1%, signal=16%	HomovsU937	pos
															GO_NEGATIVE_REGULATION_OF_RNA_SPLICING	GO_NEGATIVE_REGULATION_OF_RNA_SPLICING		24	0.495256	1.54974	0.0434783	0.642422	1	3673	tags=54%, list=27%, signal=74%	HomovsU937	pos
															GO_NEGATIVE_REGULATION_OF_ALPHA_BETA_T_CELL_ACTIVATION	GO_NEGATIVE_REGULATION_OF_ALPHA_BETA_T_CELL_ACTIVATION	Details ...	27	0.525191	1.66966	0.0131579	0.642555	1	1662	tags=33%, list=12%, signal=38%	HomovsU937	pos
															GO_REGULATION_OF_MUSCLE_ORGAN_DEVELOPMENT	GO_REGULATION_OF_MUSCLE_ORGAN_DEVELOPMENT		79	0.392878	1.3053	0.0981432	0.642605	1	1579	tags=20%, list=12%, signal=23%	HeterovsU937	pos
															GO_REGULATION_OF_MITOCHONDRIAL_FUSION	GO_REGULATION_OF_MITOCHONDRIAL_FUSION		10	0.621528	1.5152	0.0714286	0.642834	1	30	tags=10%, list=0%, signal=10%	HomovsU937	pos
															GO_STEM_CELL_DIVISION	GO_STEM_CELL_DIVISION		31	-0.560521	-1.41379	0.0858209	0.643114	1	1601	tags=23%, list=12%, signal=26%	HomovsU937	neg
															GO_REGULATION_OF_POTASSIUM_ION_TRANSPORT	GO_REGULATION_OF_POTASSIUM_ION_TRANSPORT		50	-0.524624	-1.40847	0.058264	0.643191	1	2634	tags=40%, list=19%, signal=49%	HomovsU937	neg
															GO_CELL_CELL_SIGNALING_INVOLVED_IN_CARDIAC_CONDUCTION	GO_CELL_CELL_SIGNALING_INVOLVED_IN_CARDIAC_CONDUCTION		12	-0.668231	-1.41323	0.109971	0.643312	1	658	tags=25%, list=5%, signal=26%	HomovsU937	neg
															GO_POSITIVE_REGULATION_OF_MUSCLE_CONTRACTION	GO_POSITIVE_REGULATION_OF_MUSCLE_CONTRACTION		22	-0.603245	-1.41616	0.0874172	0.643656	1	1067	tags=18%, list=8%, signal=20%	HomovsU937	neg
															GO_SMOOTH_MUSCLE_CELL_PROLIFERATION	GO_SMOOTH_MUSCLE_CELL_PROLIFERATION		77	-0.38701	-1.25038	0.131535	0.643661	1	2033	tags=27%, list=15%, signal=32%	HeterovsU937	neg
															GO_EMBRYONIC_CAMERA_TYPE_EYE_MORPHOGENESIS	GO_EMBRYONIC_CAMERA_TYPE_EYE_MORPHOGENESIS		11	0.608035	1.48576	0.0833333	0.643688	1	1058	tags=27%, list=8%, signal=30%	HomovsU937	pos
															GO_MULTICELLULAR_ORGANISM_AGING	GO_MULTICELLULAR_ORGANISM_AGING		20	0.634445	1.67601	0.0223325	0.643771	1	2284	tags=30%, list=17%, signal=36%	HeterovsU937	pos
															GO_PROSTANOID_METABOLIC_PROCESS	GO_PROSTANOID_METABOLIC_PROCESS		23	0.511583	1.5955	0.0562249	0.643908	1	2267	tags=52%, list=17%, signal=63%	HomovsU937	pos
															GO_RESPONSE_TO_HYDROPEROXIDE	GO_RESPONSE_TO_HYDROPEROXIDE		14	-0.532991	-1.25061	0.203833	0.644166	1	19	tags=7%, list=0%, signal=7%	HeterovsU937	neg
															GO_POSITIVE_REGULATION_OF_MITOCHONDRIAL_FISSION	GO_POSITIVE_REGULATION_OF_MITOCHONDRIAL_FISSION		14	0.586211	1.54194	0.0529801	0.644192	1	1204	tags=14%, list=9%, signal=16%	HomovsU937	pos
															GO_T_CELL_MEDIATED_CYTOTOXICITY	GO_T_CELL_MEDIATED_CYTOTOXICITY		26	-0.580693	-1.41454	0.0859788	0.644229	1	2888	tags=54%, list=21%, signal=68%	HomovsU937	neg
															GO_AORTA_DEVELOPMENT	GO_AORTA_DEVELOPMENT		34	-0.562277	-1.40866	0.0698795	0.644365	1	1181	tags=24%, list=9%, signal=26%	HomovsU937	neg
															GO_POSITIVE_REGULATION_OF_ATP_BIOSYNTHETIC_PROCESS	GO_POSITIVE_REGULATION_OF_ATP_BIOSYNTHETIC_PROCESS		11	-0.561332	-1.24976	0.214651	0.644374	1	1505	tags=36%, list=11%, signal=41%	HeterovsU937	neg
															GO_LYMPH_NODE_DEVELOPMENT	GO_LYMPH_NODE_DEVELOPMENT		10	0.622472	1.51276	0.0732394	0.644396	1	2874	tags=50%, list=21%, signal=63%	HomovsU937	pos
															GO_REGULATION_OF_CYTOSOLIC_CALCIUM_ION_CONCENTRATION	GO_REGULATION_OF_CYTOSOLIC_CALCIUM_ION_CONCENTRATION		152	-0.540763	-1.62185	0	0.418442	1	1450	tags=25%, list=11%, signal=28%	HomovsU937	neg
															GO_RESPONSE_TO_INTERLEUKIN_2	GO_RESPONSE_TO_INTERLEUKIN_2		10	-0.687048	-1.41494	0.0998464	0.644612	1	202	tags=10%, list=1%, signal=10%	HomovsU937	neg
															GO_NUCLEOBASE_CONTAINING_SMALL_MOLECULE_INTERCONVERSION	GO_NUCLEOBASE_CONTAINING_SMALL_MOLECULE_INTERCONVERSION		22	0.519993	1.50706	0.0734694	0.644617	1	681	tags=14%, list=5%, signal=14%	HomovsU937	pos
															GO_CIRCADIAN_REGULATION_OF_GENE_EXPRESSION	GO_CIRCADIAN_REGULATION_OF_GENE_EXPRESSION		48	0.421896	1.30344	0.130653	0.644755	1	1088	tags=10%, list=8%, signal=11%	HeterovsU937	pos
															GO_RESPONSE_TO_LITHIUM_ION	GO_RESPONSE_TO_LITHIUM_ION	Details ...	15	0.607095	1.6618	0.0104167	0.645109	1	1786	tags=40%, list=13%, signal=46%	HomovsU937	pos
															GO_NEGATIVE_REGULATION_OF_MICROTUBULE_POLYMERIZATION_OR_DEPOLYMERIZATION	GO_NEGATIVE_REGULATION_OF_MICROTUBULE_POLYMERIZATION_OR_DEPOLYMERIZATION		25	0.487469	1.29775	0.181347	0.64522	1	15	tags=4%, list=0%, signal=4%	HeterovsU937	pos
															GO_SMOOTH_MUSCLE_CONTRACTION	GO_SMOOTH_MUSCLE_CONTRACTION		50	-0.520185	-1.41533	0.0645161	0.645224	1	2616	tags=30%, list=19%, signal=37%	HomovsU937	neg
															GO_PRESYNAPTIC_ENDOCYTOSIS	GO_PRESYNAPTIC_ENDOCYTOSIS	Details ...	45	0.559709	1.70168	0.00468384	0.645347	1	641	tags=18%, list=5%, signal=19%	HeterovsU937	pos
															GO_G_PROTEIN_COUPLED_RECEPTOR_SIGNALING_PATHWAY_COUPLED_TO_CYCLIC_NUCLEOTIDE_SECOND_MESSENGER	GO_G_PROTEIN_COUPLED_RECEPTOR_SIGNALING_PATHWAY_COUPLED_TO_CYCLIC_NUCLEOTIDE_SECOND_MESSENGER		79	-0.494561	-1.40885	0.045354	0.64562	1	1397	tags=20%, list=10%, signal=22%	HomovsU937	neg
															GO_MOTOR_NEURON_AXON_GUIDANCE	GO_MOTOR_NEURON_AXON_GUIDANCE		23	0.485769	1.29813	0.168317	0.645744	1	1822	tags=43%, list=13%, signal=50%	HeterovsU937	pos
															GO_POSITIVE_REGULATION_OF_EPITHELIAL_CELL_PROLIFERATION	GO_POSITIVE_REGULATION_OF_EPITHELIAL_CELL_PROLIFERATION		100	0.374744	1.30193	0.0689655	0.645783	1	845	tags=13%, list=6%, signal=14%	HeterovsU937	pos
															GO_NEGATIVE_REGULATION_OF_LIPID_TRANSPORT	GO_NEGATIVE_REGULATION_OF_LIPID_TRANSPORT		14	0.531507	1.29961	0.184697	0.645928	1	1893	tags=36%, list=14%, signal=41%	HeterovsU937	pos
															GO_HISTONE_H3_DEACETYLATION	GO_HISTONE_H3_DEACETYLATION		18	0.522074	1.3007	0.21267	0.645985	1	60	tags=6%, list=0%, signal=6%	HeterovsU937	pos
															GO_SEGMENTATION	GO_SEGMENTATION		59	-0.515506	-1.40643	0.0460829	0.646056	1	1104	tags=15%, list=8%, signal=17%	HomovsU937	neg
															GO_POSITIVE_REGULATION_OF_INTRACELLULAR_TRANSPORT	GO_POSITIVE_REGULATION_OF_INTRACELLULAR_TRANSPORT		181	0.339351	1.3001	0.0513595	0.64608	1	1097	tags=11%, list=8%, signal=12%	HeterovsU937	pos
															GO_MICROVILLUS_ORGANIZATION	GO_MICROVILLUS_ORGANIZATION		22	0.507543	1.51635	0.0384615	0.646109	1	602	tags=23%, list=4%, signal=24%	HomovsU937	pos
															GO_REGULATION_OF_SPINDLE_ASSEMBLY	GO_REGULATION_OF_SPINDLE_ASSEMBLY		19	0.5002	1.29852	0.174118	0.646158	1	3584	tags=53%, list=26%, signal=71%	HeterovsU937	pos
															GO_LEUKOCYTE_TETHERING_OR_ROLLING	GO_LEUKOCYTE_TETHERING_OR_ROLLING		14	-0.645602	-1.41156	0.0927247	0.646626	1	1489	tags=43%, list=11%, signal=48%	HomovsU937	neg
															GO_MALE_MEIOSIS_I	GO_MALE_MEIOSIS_I		13	0.552088	1.30216	0.170264	0.646636	1	2797	tags=31%, list=21%, signal=39%	HeterovsU937	pos
															GO_HOMOPHILIC_CELL_ADHESION_VIA_PLASMA_MEMBRANE_ADHESION_MOLECULES	GO_HOMOPHILIC_CELL_ADHESION_VIA_PLASMA_MEMBRANE_ADHESION_MOLECULES		38	-0.566324	-1.38767	0.0682635	0.646663	1	1689	tags=29%, list=12%, signal=33%	HomovsHetero	neg
															GO_REGULATION_OF_SPINDLE_ORGANIZATION	GO_REGULATION_OF_SPINDLE_ORGANIZATION	Details ...	28	0.524447	1.68419	0.0210084	0.64676	1	2363	tags=39%, list=17%, signal=47%	HomovsU937	pos
															GO_POSITIVE_REGULATION_OF_PLASMA_MEMBRANE_BOUNDED_CELL_PROJECTION_ASSEMBLY	GO_POSITIVE_REGULATION_OF_PLASMA_MEMBRANE_BOUNDED_CELL_PROJECTION_ASSEMBLY		68	0.396361	1.29878	0.13089	0.646813	1	1091	tags=13%, list=8%, signal=14%	HeterovsU937	pos
															GO_POSITIVE_REGULATION_OF_CHEMOKINE_PRODUCTION	GO_POSITIVE_REGULATION_OF_CHEMOKINE_PRODUCTION		30	0.49725	1.56659	0.0333333	0.646977	1	920	tags=30%, list=7%, signal=32%	HomovsU937	pos
															GO_FEEDING_BEHAVIOR	GO_FEEDING_BEHAVIOR		39	-0.548151	-1.40902	0.0723926	0.647027	1	2451	tags=33%, list=18%, signal=41%	HomovsU937	neg
															GO_HINDBRAIN_MORPHOGENESIS	GO_HINDBRAIN_MORPHOGENESIS		25	0.46908	1.30079	0.160377	0.647212	1	129	tags=8%, list=1%, signal=8%	HeterovsU937	pos
															GO_PROSTANOID_BIOSYNTHETIC_PROCESS	GO_PROSTANOID_BIOSYNTHETIC_PROCESS		15	0.541472	1.48814	0.0880282	0.647235	1	2194	tags=53%, list=16%, signal=64%	HomovsU937	pos
															GO_BONE_MINERALIZATION	GO_BONE_MINERALIZATION		61	-0.536256	-1.39149	0.0567297	0.647471	1	1419	tags=23%, list=10%, signal=26%	HomovsHetero	neg
															GO_POSITIVE_REGULATION_OF_INTERLEUKIN_10_PRODUCTION	GO_POSITIVE_REGULATION_OF_INTERLEUKIN_10_PRODUCTION		20	0.481711	1.43686	0.0675105	0.647501	1	5	tags=5%, list=0%, signal=5%	HomovsU937	pos
															GO_MUSCLE_FILAMENT_SLIDING	GO_MUSCLE_FILAMENT_SLIDING	Details ...	14	0.768637	1.82886	0.00468384	0.647619	0.997	1178	tags=43%, list=9%, signal=47%	HeterovsU937	pos
															GO_REGULATION_OF_METANEPHROS_DEVELOPMENT	GO_REGULATION_OF_METANEPHROS_DEVELOPMENT		11	-0.66569	-1.40939	0.102679	0.647622	1	514	tags=27%, list=4%, signal=28%	HomovsU937	neg
															GO_CELL_DIFFERENTIATION_INVOLVED_IN_KIDNEY_DEVELOPMENT	GO_CELL_DIFFERENTIATION_INVOLVED_IN_KIDNEY_DEVELOPMENT		26	-0.589784	-1.38824	0.106632	0.64766	1	286	tags=15%, list=2%, signal=16%	HomovsHetero	neg
															GO_POSITIVE_REGULATION_OF_PROTEIN_POLYUBIQUITINATION	GO_POSITIVE_REGULATION_OF_PROTEIN_POLYUBIQUITINATION		10	-0.696866	-1.38514	0.139013	0.647694	1	2162	tags=50%, list=16%, signal=59%	HomovsHetero	neg
															GO_REGULATION_OF_RNA_POLYMERASE_II_TRANSCRIPTION_PREINITIATION_COMPLEX_ASSEMBLY	GO_REGULATION_OF_RNA_POLYMERASE_II_TRANSCRIPTION_PREINITIATION_COMPLEX_ASSEMBLY		12	0.547361	1.43817	0.0938511	0.647769	1	4880	tags=67%, list=36%, signal=104%	HomovsU937	pos
															GO_PROXIMAL_DISTAL_PATTERN_FORMATION	GO_PROXIMAL_DISTAL_PATTERN_FORMATION		14	-0.651055	-1.41167	0.107402	0.648277	1	1104	tags=29%, list=8%, signal=31%	HomovsU937	neg
															GO_NUCLEOTIDE_EXCISION_REPAIR_DNA_GAP_FILLING	GO_NUCLEOTIDE_EXCISION_REPAIR_DNA_GAP_FILLING		22	0.475735	1.43094	0.0691057	0.648282	1	4310	tags=64%, list=32%, signal=93%	HomovsU937	pos
															GO_CEREBELLAR_CORTEX_DEVELOPMENT	GO_CEREBELLAR_CORTEX_DEVELOPMENT		31	-0.587264	-1.38769	0.0781441	0.648329	1	594	tags=13%, list=4%, signal=13%	HomovsHetero	neg
															GO_METENCEPHALON_DEVELOPMENT	GO_METENCEPHALON_DEVELOPMENT		72	-0.533209	-1.3858	0.0486726	0.648344	1	1181	tags=18%, list=9%, signal=20%	HomovsHetero	neg
															GO_POSITIVE_REGULATION_OF_EXTRACELLULAR_MATRIX_ORGANIZATION	GO_POSITIVE_REGULATION_OF_EXTRACELLULAR_MATRIX_ORGANIZATION		16	0.539866	1.29599	0.17037	0.64855	1	698	tags=19%, list=5%, signal=20%	HeterovsU937	pos
															GO_PROTEIN_INSERTION_INTO_MITOCHONDRIAL_MEMBRANE_INVOLVED_IN_APOPTOTIC_SIGNALING_PATHWAY	GO_PROTEIN_INSERTION_INTO_MITOCHONDRIAL_MEMBRANE_INVOLVED_IN_APOPTOTIC_SIGNALING_PATHWAY		25	0.510305	1.54533	0.0371901	0.648603	1	2552	tags=40%, list=19%, signal=49%	HomovsU937	pos
															GO_REGULATION_OF_GLUTAMATE_RECEPTOR_SIGNALING_PATHWAY	GO_REGULATION_OF_GLUTAMATE_RECEPTOR_SIGNALING_PATHWAY	Details ...	34	-0.726813	-1.82099	0	0.30747	0.766	1594	tags=50%, list=12%, signal=57%	HomovsU937	neg
															GO_REGULATION_OF_CYTOKINE_PRODUCTION_INVOLVED_IN_IMMUNE_RESPONSE	GO_REGULATION_OF_CYTOKINE_PRODUCTION_INVOLVED_IN_IMMUNE_RESPONSE		52	-0.41071	-1.24556	0.159744	0.648685	1	3101	tags=38%, list=23%, signal=50%	HeterovsU937	neg
															GO_SARCOMERE_ORGANIZATION	GO_SARCOMERE_ORGANIZATION		17	-0.639409	-1.38645	0.122951	0.648747	1	987	tags=29%, list=7%, signal=32%	HomovsHetero	neg
															GO_PERIPHERAL_NERVOUS_SYSTEM_DEVELOPMENT	GO_PERIPHERAL_NERVOUS_SYSTEM_DEVELOPMENT		37	-0.573708	-1.38837	0.0927467	0.6489	1	1123	tags=19%, list=8%, signal=21%	HomovsHetero	neg
															GO_SEMAPHORIN_PLEXIN_SIGNALING_PATHWAY_INVOLVED_IN_NEURON_PROJECTION_GUIDANCE	GO_SEMAPHORIN_PLEXIN_SIGNALING_PATHWAY_INVOLVED_IN_NEURON_PROJECTION_GUIDANCE		11	-0.670695	-1.4096	0.117021	0.648936	1	844	tags=27%, list=6%, signal=29%	HomovsU937	neg
															GO_DEVELOPMENTAL_PIGMENTATION	GO_DEVELOPMENTAL_PIGMENTATION		26	-0.473271	-1.24584	0.186125	0.649011	1	545	tags=23%, list=4%, signal=24%	HeterovsU937	neg
															GO_POSITIVE_REGULATION_OF_RUFFLE_ASSEMBLY	GO_POSITIVE_REGULATION_OF_RUFFLE_ASSEMBLY		10	0.637987	1.5685	0.0538922	0.649029	1	4484	tags=80%, list=33%, signal=119%	HomovsU937	pos
															GO_POSITIVE_REGULATION_OF_RESPONSE_TO_CYTOKINE_STIMULUS	GO_POSITIVE_REGULATION_OF_RESPONSE_TO_CYTOKINE_STIMULUS		39	0.408336	1.43214	0.0529412	0.649069	1	723	tags=15%, list=5%, signal=16%	HomovsU937	pos
															GO_CELL_CELL_ADHESION_MEDIATED_BY_INTEGRIN	GO_CELL_CELL_ADHESION_MEDIATED_BY_INTEGRIN		10	0.591248	1.29472	0.195067	0.649105	1	3010	tags=50%, list=22%, signal=64%	HeterovsU937	pos
															GO_POSITIVE_REGULATION_OF_CELL_MORPHOGENESIS_INVOLVED_IN_DIFFERENTIATION	GO_POSITIVE_REGULATION_OF_CELL_MORPHOGENESIS_INVOLVED_IN_DIFFERENTIATION		106	0.365248	1.29416	0.0852713	0.649106	1	701	tags=8%, list=5%, signal=8%	HeterovsU937	pos
															GO_NEGATIVE_REGULATION_OF_VASCULAR_ASSOCIATED_SMOOTH_MUSCLE_CELL_PROLIFERATION	GO_NEGATIVE_REGULATION_OF_VASCULAR_ASSOCIATED_SMOOTH_MUSCLE_CELL_PROLIFERATION		12	-0.55204	-1.24618	0.226644	0.649209	1	2559	tags=58%, list=19%, signal=72%	HeterovsU937	neg
															GO_RESPONSE_TO_BMP	GO_RESPONSE_TO_BMP		81	-0.522165	-1.38871	0.0495156	0.649268	1	1198	tags=19%, list=9%, signal=20%	HomovsHetero	neg
															GO_NEGATIVE_REGULATION_OF_BLOOD_VESSEL_ENDOTHELIAL_CELL_MIGRATION	GO_NEGATIVE_REGULATION_OF_BLOOD_VESSEL_ENDOTHELIAL_CELL_MIGRATION		24	-0.599191	-1.38519	0.0982503	0.649269	1	152	tags=13%, list=1%, signal=13%	HomovsHetero	neg
															GO_RESPONSE_TO_COPPER_ION	GO_RESPONSE_TO_COPPER_ION		27	-0.596247	-1.38593	0.084399	0.64941	1	2776	tags=41%, list=20%, signal=51%	HomovsHetero	neg
															GO_NEURAL_NUCLEUS_DEVELOPMENT	GO_NEURAL_NUCLEUS_DEVELOPMENT		39	0.432255	1.50749	0.0290698	0.649635	1	1524	tags=18%, list=11%, signal=20%	HomovsU937	pos
															GO_SPINDLE_ASSEMBLY	GO_SPINDLE_ASSEMBLY		96	0.358229	1.43899	0.0125	0.649898	1	2684	tags=32%, list=20%, signal=40%	HomovsU937	pos
															GO_CELL_COMMUNICATION_BY_ELECTRICAL_COUPLING	GO_CELL_COMMUNICATION_BY_ELECTRICAL_COUPLING		14	0.54285	1.42052	0.101639	0.6499	1	1970	tags=50%, list=15%, signal=58%	HomovsHetero	pos
															GO_OLIGODENDROCYTE_DEVELOPMENT	GO_OLIGODENDROCYTE_DEVELOPMENT		29	0.606523	1.6773	0.025522	0.649925	1	801	tags=24%, list=6%, signal=26%	HeterovsU937	pos
															GO_CARDIAC_MUSCLE_CELL_CONTRACTION	GO_CARDIAC_MUSCLE_CELL_CONTRACTION		36	-0.5503	-1.40986	0.0834371	0.649974	1	2634	tags=47%, list=19%, signal=58%	HomovsU937	neg
															GO_KERATINOCYTE_MIGRATION	GO_KERATINOCYTE_MIGRATION		12	-0.546241	-1.24628	0.210432	0.650077	1	2754	tags=42%, list=20%, signal=52%	HeterovsU937	neg
															GO_NEGATIVE_REGULATION_OF_NUCLEOTIDE_METABOLIC_PROCESS	GO_NEGATIVE_REGULATION_OF_NUCLEOTIDE_METABOLIC_PROCESS		11	-0.683943	-1.38895	0.110949	0.650097	1	926	tags=27%, list=7%, signal=29%	HomovsHetero	neg
															GO_INTERACTION_WITH_SYMBIONT	GO_INTERACTION_WITH_SYMBIONT		50	0.417662	1.29481	0.142506	0.650344	1	905	tags=10%, list=7%, signal=11%	HeterovsU937	pos
															GO_POSITIVE_REGULATION_OF_PROTEIN_BINDING	GO_POSITIVE_REGULATION_OF_PROTEIN_BINDING		65	-0.528442	-1.38649	0.050905	0.650373	1	303	tags=9%, list=2%, signal=9%	HomovsHetero	neg
															GO_ACTIVATION_OF_NF_KAPPAB_INDUCING_KINASE_ACTIVITY	GO_ACTIVATION_OF_NF_KAPPAB_INDUCING_KINASE_ACTIVITY		10	-0.705723	-1.39007	0.130501	0.650411	1	206	tags=20%, list=2%, signal=20%	HomovsHetero	neg
															GO_NEGATIVE_REGULATION_OF_DNA_TEMPLATED_TRANSCRIPTION_ELONGATION	GO_NEGATIVE_REGULATION_OF_DNA_TEMPLATED_TRANSCRIPTION_ELONGATION	Details ...	13	0.631026	1.67162	0.0179856	0.65054	1	2516	tags=46%, list=19%, signal=57%	HomovsU937	pos
															GO_POSITIVE_REGULATION_OF_CELLULAR_EXTRAVASATION	GO_POSITIVE_REGULATION_OF_CELLULAR_EXTRAVASATION		10	-0.576613	-1.24729	0.21466	0.650631	1	1191	tags=30%, list=9%, signal=33%	HeterovsU937	neg
															GO_NEGATIVE_REGULATION_OF_PHOSPHATIDYLINOSITOL_3_KINASE_SIGNALING	GO_NEGATIVE_REGULATION_OF_PHOSPHATIDYLINOSITOL_3_KINASE_SIGNALING		12	0.579682	1.517	0.0761589	0.650683	1	3260	tags=67%, list=24%, signal=88%	HomovsU937	pos
															GO_POSITIVE_REGULATION_OF_PROTEIN_MATURATION	GO_POSITIVE_REGULATION_OF_PROTEIN_MATURATION		17	-0.502253	-1.24677	0.205686	0.650969	1	2764	tags=53%, list=20%, signal=66%	HeterovsU937	neg
															GO_REGULATION_OF_LIPID_KINASE_ACTIVITY	GO_REGULATION_OF_LIPID_KINASE_ACTIVITY		45	0.430491	1.29135	0.151807	0.650983	1	328	tags=13%, list=2%, signal=14%	HeterovsU937	pos
															GO_PHOTOTRANSDUCTION	GO_PHOTOTRANSDUCTION		23	-0.601199	-1.38954	0.109091	0.650986	1	1422	tags=26%, list=10%, signal=29%	HomovsHetero	neg
															GO_PHOSPHATIDYLCHOLINE_METABOLIC_PROCESS	GO_PHOSPHATIDYLCHOLINE_METABOLIC_PROCESS		54	-0.411701	-1.24635	0.147011	0.651023	1	2617	tags=26%, list=19%, signal=32%	HeterovsU937	neg
															GO_NEPHRON_DEVELOPMENT	GO_NEPHRON_DEVELOPMENT		69	0.391143	1.29027	0.110837	0.651059	1	840	tags=17%, list=6%, signal=18%	HeterovsU937	pos
															GO_LIPID_TRANSLOCATION	GO_LIPID_TRANSLOCATION		27	-0.604014	-1.39032	0.105528	0.651066	1	738	tags=19%, list=5%, signal=20%	HomovsHetero	neg
															GO_POSITIVE_REGULATION_OF_PROTEIN_KINASE_B_SIGNALING	GO_POSITIVE_REGULATION_OF_PROTEIN_KINASE_B_SIGNALING		86	0.380209	1.29238	0.0972222	0.651144	1	840	tags=14%, list=6%, signal=15%	HeterovsU937	pos
															GO_CENTRAL_NERVOUS_SYSTEM_NEURON_DIFFERENTIATION	GO_CENTRAL_NERVOUS_SYSTEM_NEURON_DIFFERENTIATION		96	0.371422	1.29178	0.0890585	0.651269	1	623	tags=9%, list=5%, signal=10%	HeterovsU937	pos
															GO_MORPHOGENESIS_OF_A_BRANCHING_STRUCTURE	GO_MORPHOGENESIS_OF_A_BRANCHING_STRUCTURE		101	0.363963	1.27906	0.0953679	0.651282	1	845	tags=15%, list=6%, signal=16%	HeterovsU937	pos
															GO_SPROUTING_ANGIOGENESIS	GO_SPROUTING_ANGIOGENESIS		63	-0.511872	-1.41004	0.049162	0.651325	1	140	tags=8%, list=1%, signal=8%	HomovsU937	neg
															GO_PLACENTA_DEVELOPMENT	GO_PLACENTA_DEVELOPMENT		86	-0.516546	-1.38906	0.0480874	0.651339	1	1545	tags=15%, list=11%, signal=17%	HomovsHetero	neg
															GO_RESPONSE_TO_LEAD_ION	GO_RESPONSE_TO_LEAD_ION		16	0.518142	1.28273	0.214634	0.651359	1	3701	tags=63%, list=27%, signal=86%	HeterovsU937	pos
															GO_RRNA_TRANSCRIPTION	GO_RRNA_TRANSCRIPTION		28	0.467409	1.27849	0.184685	0.651423	1	3834	tags=46%, list=28%, signal=65%	HeterovsU937	pos
															GO_CARDIAC_ATRIUM_MORPHOGENESIS	GO_CARDIAC_ATRIUM_MORPHOGENESIS		15	0.518199	1.29066	0.212658	0.65144	1	2123	tags=40%, list=16%, signal=47%	HeterovsU937	pos
															GO_DENDRITE_EXTENSION	GO_DENDRITE_EXTENSION		22	-0.608808	-1.38392	0.110672	0.65146	1	1205	tags=23%, list=9%, signal=25%	HomovsHetero	neg
															GO_REGULATION_OF_PRODUCTION_OF_SMALL_RNA_INVOLVED_IN_GENE_SILENCING_BY_RNA	GO_REGULATION_OF_PRODUCTION_OF_SMALL_RNA_INVOLVED_IN_GENE_SILENCING_BY_RNA		17	0.536772	1.51872	0.05	0.651563	1	2887	tags=41%, list=21%, signal=52%	HomovsU937	pos
															GO_REGULATION_OF_HISTONE_H3_K4_METHYLATION	GO_REGULATION_OF_HISTONE_H3_K4_METHYLATION		22	0.48936	1.28696	0.188095	0.651588	1	4275	tags=55%, list=31%, signal=79%	HeterovsU937	pos
															GO_TOLL_LIKE_RECEPTOR_3_SIGNALING_PATHWAY	GO_TOLL_LIKE_RECEPTOR_3_SIGNALING_PATHWAY		13	-0.654409	-1.38345	0.123853	0.651713	1	43	tags=8%, list=0%, signal=8%	HomovsHetero	neg
															GO_MONONUCLEAR_CELL_DIFFERENTIATION	GO_MONONUCLEAR_CELL_DIFFERENTIATION		30	-0.45192	-1.24377	0.191304	0.651758	1	1543	tags=30%, list=11%, signal=34%	HeterovsU937	neg
															GO_POSITIVE_REGULATION_OF_MITOCHONDRIAL_OUTER_MEMBRANE_PERMEABILIZATION_INVOLVED_IN_APOPTOTIC_SIGNALING_PATHWAY	GO_POSITIVE_REGULATION_OF_MITOCHONDRIAL_OUTER_MEMBRANE_PERMEABILIZATION_INVOLVED_IN_APOPTOTIC_SIGNALING_PATHWAY		28	0.488993	1.54196	0.0414938	0.651845	1	2552	tags=36%, list=19%, signal=44%	HomovsU937	pos
															GO_HORMONE_BIOSYNTHETIC_PROCESS	GO_HORMONE_BIOSYNTHETIC_PROCESS		35	0.450637	1.27934	0.173913	0.651967	1	1845	tags=29%, list=14%, signal=33%	HeterovsU937	pos
															GO_REGULATION_OF_CELL_CYCLE_G2_M_PHASE_TRANSITION	GO_REGULATION_OF_CELL_CYCLE_G2_M_PHASE_TRANSITION		183	0.337327	1.29259	0.0724638	0.65201	1	3448	tags=35%, list=25%, signal=46%	HeterovsU937	pos
															GO_INCLUSION_BODY_ASSEMBLY	GO_INCLUSION_BODY_ASSEMBLY		19	0.483625	1.43261	0.0916031	0.652027	1	2204	tags=47%, list=16%, signal=56%	HomovsU937	pos
															GO_TRANSMISSION_OF_NERVE_IMPULSE	GO_TRANSMISSION_OF_NERVE_IMPULSE		22	0.493132	1.28195	0.187179	0.652056	1	188	tags=18%, list=1%, signal=18%	HeterovsU937	pos
															GO_CILIUM_MOVEMENT	GO_CILIUM_MOVEMENT		71	-0.387303	-1.24171	0.153846	0.6521	1	3151	tags=35%, list=23%, signal=46%	HeterovsU937	neg
															GO_G_PROTEIN_COUPLED_RECEPTOR_SIGNALING_PATHWAY_COUPLED_TO_CYCLIC_NUCLEOTIDE_SECOND_MESSENGER	GO_G_PROTEIN_COUPLED_RECEPTOR_SIGNALING_PATHWAY_COUPLED_TO_CYCLIC_NUCLEOTIDE_SECOND_MESSENGER		79	-0.384795	-1.24131	0.164495	0.652181	1	2055	tags=28%, list=15%, signal=33%	HeterovsU937	neg
															GO_REGULATION_OF_BLOOD_CIRCULATION	GO_REGULATION_OF_BLOOD_CIRCULATION		137	-0.348171	-1.24401	0.107087	0.652186	1	1259	tags=20%, list=9%, signal=22%	HeterovsU937	neg
															GO_REGULATION_OF_NERVOUS_SYSTEM_PROCESS	GO_REGULATION_OF_NERVOUS_SYSTEM_PROCESS		77	-0.520902	-1.38294	0.0406147	0.652245	1	1642	tags=23%, list=12%, signal=26%	HomovsHetero	neg
															GO_CEREBELLAR_CORTEX_MORPHOGENESIS	GO_CEREBELLAR_CORTEX_MORPHOGENESIS		20	0.507718	1.27716	0.205607	0.652311	1	129	tags=10%, list=1%, signal=10%	HeterovsU937	pos
															GO_INTERSTRAND_CROSS_LINK_REPAIR	GO_INTERSTRAND_CROSS_LINK_REPAIR		47	0.413983	1.48837	0.0429448	0.652319	1	4704	tags=60%, list=35%, signal=91%	HomovsU937	pos
															GO_MITOTIC_CELL_CYCLE_ARREST	GO_MITOTIC_CELL_CYCLE_ARREST		13	0.536163	1.27759	0.22807	0.652494	1	158	tags=15%, list=1%, signal=16%	HeterovsU937	pos
															GO_SECONDARY_PALATE_DEVELOPMENT	GO_SECONDARY_PALATE_DEVELOPMENT		14	0.541864	1.28282	0.214634	0.652513	1	1703	tags=50%, list=13%, signal=57%	HeterovsU937	pos
															GO_P38MAPK_CASCADE	GO_P38MAPK_CASCADE		34	0.486665	1.60157	0.0375587	0.65266	1	1578	tags=29%, list=12%, signal=33%	HomovsU937	pos
															GO_REGULATION_OF_ENDOTHELIAL_CELL_DEVELOPMENT	GO_REGULATION_OF_ENDOTHELIAL_CELL_DEVELOPMENT		13	0.537487	1.2765	0.212963	0.652676	1	636	tags=15%, list=5%, signal=16%	HeterovsU937	pos
															GO_POSITIVE_REGULATION_OF_SPHINGOLIPID_BIOSYNTHETIC_PROCESS	GO_POSITIVE_REGULATION_OF_SPHINGOLIPID_BIOSYNTHETIC_PROCESS		10	-0.566734	-1.24301	0.204668	0.652808	1	456	tags=20%, list=3%, signal=21%	HeterovsU937	neg
															GO_REPLICATION_FORK_PROCESSING	GO_REPLICATION_FORK_PROCESSING		29	0.465528	1.28703	0.157761	0.65285	1	2758	tags=41%, list=20%, signal=52%	HeterovsU937	pos
															GO_NEGATIVE_REGULATION_OF_ACTIN_FILAMENT_BUNDLE_ASSEMBLY	GO_NEGATIVE_REGULATION_OF_ACTIN_FILAMENT_BUNDLE_ASSEMBLY		17	0.528155	1.2837	0.196305	0.653003	1	14	tags=6%, list=0%, signal=6%	HeterovsU937	pos
															GO_MITOCHONDRIAL_DEPOLARIZATION	GO_MITOCHONDRIAL_DEPOLARIZATION		16	-0.504092	-1.24177	0.223729	0.653086	1	931	tags=25%, list=7%, signal=27%	HeterovsU937	neg
															GO_SPLICEOSOMAL_TRI_SNRNP_COMPLEX_ASSEMBLY	GO_SPLICEOSOMAL_TRI_SNRNP_COMPLEX_ASSEMBLY		12	0.562004	1.28744	0.196833	0.65321	1	4220	tags=58%, list=31%, signal=85%	HeterovsU937	pos
															GO_HOMOLOGOUS_CHROMOSOME_SEGREGATION	GO_HOMOLOGOUS_CHROMOSOME_SEGREGATION		36	0.432643	1.43939	0.0628272	0.653266	1	936	tags=22%, list=7%, signal=24%	HomovsU937	pos
															GO_CENTRAL_NERVOUS_SYSTEM_PROJECTION_NEURON_AXONOGENESIS	GO_CENTRAL_NERVOUS_SYSTEM_PROJECTION_NEURON_AXONOGENESIS		17	0.529043	1.28308	0.196172	0.653278	1	623	tags=18%, list=5%, signal=18%	HeterovsU937	pos
															GO_MICROTUBULE_CYTOSKELETON_ORGANIZATION_INVOLVED_IN_MITOSIS	GO_MICROTUBULE_CYTOSKELETON_ORGANIZATION_INVOLVED_IN_MITOSIS		121	0.355144	1.27936	0.10101	0.653303	1	3191	tags=43%, list=23%, signal=56%	HeterovsU937	pos
															GO_ENTRY_OF_BACTERIUM_INTO_HOST_CELL	GO_ENTRY_OF_BACTERIUM_INTO_HOST_CELL		11	-0.565086	-1.23938	0.227353	0.65334	1	857	tags=18%, list=6%, signal=19%	HeterovsU937	neg
															GO_PROTEIN_KINASE_A_SIGNALING	GO_PROTEIN_KINASE_A_SIGNALING		19	-0.612879	-1.40438	0.0969044	0.653378	1	88	tags=11%, list=1%, signal=11%	HomovsU937	neg
															GO_REGULATION_OF_AUTOPHAGY_OF_MITOCHONDRION	GO_REGULATION_OF_AUTOPHAGY_OF_MITOCHONDRION		41	0.429446	1.28089	0.153086	0.653407	1	14	tags=2%, list=0%, signal=2%	HeterovsU937	pos
															GO_CYTOSKELETON_DEPENDENT_CYTOKINESIS	GO_CYTOSKELETON_DEPENDENT_CYTOKINESIS		72	0.38728	1.28788	0.0956284	0.653415	1	2615	tags=31%, list=19%, signal=38%	HeterovsU937	pos
															GO_L_ASCORBIC_ACID_METABOLIC_PROCESS	GO_L_ASCORBIC_ACID_METABOLIC_PROCESS	Details ...	10	0.767726	1.69731	0.0234192	0.653449	1	2	tags=10%, list=0%, signal=10%	HeterovsU937	pos
															GO_CAMERA_TYPE_EYE_MORPHOGENESIS	GO_CAMERA_TYPE_EYE_MORPHOGENESIS		65	0.391269	1.28036	0.103535	0.653531	1	649	tags=9%, list=5%, signal=10%	HeterovsU937	pos
															GO_EXIT_FROM_MITOSIS	GO_EXIT_FROM_MITOSIS	Details ...	25	0.639546	1.69188	0.0122249	0.653533	1	1983	tags=36%, list=15%, signal=42%	HeterovsU937	pos
															GO_POSITIVE_REGULATION_OF_MAP_KINASE_ACTIVITY	GO_POSITIVE_REGULATION_OF_MAP_KINASE_ACTIVITY		179	0.336863	1.28403	0.0710382	0.653538	1	792	tags=11%, list=6%, signal=11%	HeterovsU937	pos
															GO_ACTIVATION_OF_ADENYLATE_CYCLASE_ACTIVITY	GO_ACTIVATION_OF_ADENYLATE_CYCLASE_ACTIVITY		13	0.54318	1.42095	0.0835821	0.653745	1	698	tags=23%, list=5%, signal=24%	HomovsHetero	pos
															GO_POSITIVE_REGULATION_OF_PROTEIN_POLYMERIZATION	GO_POSITIVE_REGULATION_OF_PROTEIN_POLYMERIZATION		98	0.369178	1.28559	0.0879397	0.653792	1	1480	tags=13%, list=11%, signal=15%	HeterovsU937	pos
															GO_PLASMA_MEMBRANE_TUBULATION	GO_PLASMA_MEMBRANE_TUBULATION		15	0.541028	1.28823	0.1875	0.653813	1	830	tags=20%, list=6%, signal=21%	HeterovsU937	pos
															GO_HEMATOPOIETIC_PROGENITOR_CELL_DIFFERENTIATION	GO_HEMATOPOIETIC_PROGENITOR_CELL_DIFFERENTIATION		130	0.348772	1.27962	0.0855615	0.653951	1	314	tags=5%, list=2%, signal=5%	HeterovsU937	pos
															GO_NEUTRAL_LIPID_BIOSYNTHETIC_PROCESS	GO_NEUTRAL_LIPID_BIOSYNTHETIC_PROCESS		30	-0.451856	-1.23955	0.190227	0.65396	1	1598	tags=23%, list=12%, signal=26%	HeterovsU937	neg
															GO_GASTRULATION	GO_GASTRULATION		108	0.365321	1.28441	0.0941476	0.653979	1	902	tags=17%, list=7%, signal=18%	HeterovsU937	pos
															GO_POSITIVE_REGULATION_OF_LIPID_BIOSYNTHETIC_PROCESS	GO_POSITIVE_REGULATION_OF_LIPID_BIOSYNTHETIC_PROCESS		57	-0.416873	-1.24183	0.175879	0.654057	1	1712	tags=25%, list=13%, signal=28%	HeterovsU937	neg
															GO_PYRIMIDINE_RIBONUCLEOTIDE_METABOLIC_PROCESS	GO_PYRIMIDINE_RIBONUCLEOTIDE_METABOLIC_PROCESS		20	0.485708	1.28485	0.187067	0.654354	1	1448	tags=20%, list=11%, signal=22%	HeterovsU937	pos
															GO_REGULATION_OF_PLASMA_MEMBRANE_ORGANIZATION	GO_REGULATION_OF_PLASMA_MEMBRANE_ORGANIZATION		12	-0.546747	-1.2421	0.234767	0.654425	1	2749	tags=42%, list=20%, signal=52%	HeterovsU937	neg
															GO_FORMATION_OF_EXTRACHROMOSOMAL_CIRCULAR_DNA	GO_FORMATION_OF_EXTRACHROMOSOMAL_CIRCULAR_DNA		13	0.535955	1.2753	0.194508	0.654487	1	1992	tags=38%, list=15%, signal=45%	HeterovsU937	pos
															GO_POSITIVE_REGULATION_OF_SMALL_MOLECULE_METABOLIC_PROCESS	GO_POSITIVE_REGULATION_OF_SMALL_MOLECULE_METABOLIC_PROCESS		91	-0.375805	-1.23977	0.140323	0.654489	1	1505	tags=22%, list=11%, signal=25%	HeterovsU937	neg
															GO_VENTRICULAR_CARDIAC_MUSCLE_TISSUE_DEVELOPMENT	GO_VENTRICULAR_CARDIAC_MUSCLE_TISSUE_DEVELOPMENT		27	-0.457359	-1.24011	0.214411	0.654584	1	212	tags=7%, list=2%, signal=8%	HeterovsU937	neg
															GO_REGULATION_OF_GLIOGENESIS	GO_REGULATION_OF_GLIOGENESIS		68	0.387105	1.27272	0.1175	0.654608	1	646	tags=12%, list=5%, signal=12%	HeterovsU937	pos
															GO_REGULATION_OF_MICROTUBULE_BASED_MOVEMENT	GO_REGULATION_OF_MICROTUBULE_BASED_MOVEMENT		24	-0.471866	-1.23668	0.22242	0.654631	1	2529	tags=33%, list=19%, signal=41%	HeterovsU937	neg
															GO_RESPONSE_TO_ALKALOID	GO_RESPONSE_TO_ALKALOID		66	-0.389119	-1.23627	0.173242	0.65471	1	812	tags=11%, list=6%, signal=11%	HeterovsU937	neg
															GO_LEUKOCYTE_ACTIVATION_INVOLVED_IN_INFLAMMATORY_RESPONSE	GO_LEUKOCYTE_ACTIVATION_INVOLVED_IN_INFLAMMATORY_RESPONSE		29	0.480393	1.28832	0.180662	0.654981	1	959	tags=24%, list=7%, signal=26%	HeterovsU937	pos
															GO_NEGATIVE_REGULATION_OF_LIPID_TRANSPORT	GO_NEGATIVE_REGULATION_OF_LIPID_TRANSPORT		14	0.530451	1.44024	0.0955882	0.65499	1	2261	tags=36%, list=17%, signal=43%	HomovsU937	pos
															GO_EMBRYONIC_HINDLIMB_MORPHOGENESIS	GO_EMBRYONIC_HINDLIMB_MORPHOGENESIS		16	0.680135	1.6787	0.025522	0.655147	1	302	tags=25%, list=2%, signal=26%	HeterovsU937	pos
															GO_MICROVILLUS_ASSEMBLY	GO_MICROVILLUS_ASSEMBLY		16	0.511007	1.43298	0.104895	0.655429	1	602	tags=25%, list=4%, signal=26%	HomovsU937	pos
															GO_REGULATION_OF_RESPONSE_TO_INTERFERON_GAMMA	GO_REGULATION_OF_RESPONSE_TO_INTERFERON_GAMMA		20	-0.496043	-1.23755	0.212613	0.655459	1	3120	tags=45%, list=23%, signal=58%	HeterovsU937	neg
															GO_REGULATION_OF_EPIDERMAL_GROWTH_FACTOR_ACTIVATED_RECEPTOR_ACTIVITY	GO_REGULATION_OF_EPIDERMAL_GROWTH_FACTOR_ACTIVATED_RECEPTOR_ACTIVITY		20	0.504774	1.49281	0.0549451	0.655518	1	1177	tags=20%, list=9%, signal=22%	HomovsU937	pos
															GO_EMBRYONIC_DIGESTIVE_TRACT_DEVELOPMENT	GO_EMBRYONIC_DIGESTIVE_TRACT_DEVELOPMENT		18	-0.501975	-1.23675	0.211806	0.655565	1	403	tags=22%, list=3%, signal=23%	HeterovsU937	neg
															GO_REGULATION_OF_T_HELPER_17_TYPE_IMMUNE_RESPONSE	GO_REGULATION_OF_T_HELPER_17_TYPE_IMMUNE_RESPONSE		14	-0.526652	-1.23828	0.215278	0.655599	1	3047	tags=36%, list=22%, signal=46%	HeterovsU937	neg
															GO_ESTABLISHMENT_OR_MAINTENANCE_OF_MONOPOLAR_CELL_POLARITY	GO_ESTABLISHMENT_OR_MAINTENANCE_OF_MONOPOLAR_CELL_POLARITY		14	0.539685	1.49634	0.0784983	0.655607	1	2911	tags=50%, list=21%, signal=64%	HomovsU937	pos
															GO_REGULATION_OF_TRANSPOSITION	GO_REGULATION_OF_TRANSPOSITION		11	0.560083	1.27435	0.202797	0.6557	1	2797	tags=55%, list=21%, signal=69%	HeterovsU937	pos
															GO_CILIUM_OR_FLAGELLUM_DEPENDENT_CELL_MOTILITY	GO_CILIUM_OR_FLAGELLUM_DEPENDENT_CELL_MOTILITY		56	-0.40267	-1.23706	0.168301	0.655744	1	3104	tags=34%, list=23%, signal=44%	HeterovsU937	neg
															GO_REGULATION_OF_VASCULAR_ASSOCIATED_SMOOTH_MUSCLE_CELL_PROLIFERATION	GO_REGULATION_OF_VASCULAR_ASSOCIATED_SMOOTH_MUSCLE_CELL_PROLIFERATION		34	-0.435852	-1.23783	0.202614	0.655826	1	2754	tags=41%, list=20%, signal=52%	HeterovsU937	neg
															GO_NUCLEOSOME_ASSEMBLY	GO_NUCLEOSOME_ASSEMBLY		52	0.41136	1.27277	0.140143	0.655834	1	5093	tags=69%, list=37%, signal=110%	HeterovsU937	pos
															GO_HETEROTYPIC_CELL_CELL_ADHESION	GO_HETEROTYPIC_CELL_CELL_ADHESION		30	0.439823	1.46684	0.0564103	0.656011	1	1329	tags=37%, list=10%, signal=41%	HomovsU937	pos
															GO_POSITIVE_REGULATION_OF_CELL_CYCLE_PHASE_TRANSITION	GO_POSITIVE_REGULATION_OF_CELL_CYCLE_PHASE_TRANSITION		83	0.374427	1.27309	0.110276	0.656348	1	2786	tags=31%, list=21%, signal=39%	HeterovsU937	pos
															GO_ARTERY_MORPHOGENESIS	GO_ARTERY_MORPHOGENESIS		33	-0.576918	-1.38045	0.0839416	0.656493	1	624	tags=15%, list=5%, signal=16%	HomovsHetero	neg
															GO_POSITIVE_REGULATION_OF_PROTEIN_LOCALIZATION_TO_CELL_SURFACE	GO_POSITIVE_REGULATION_OF_PROTEIN_LOCALIZATION_TO_CELL_SURFACE		15	0.543623	1.4235	0.0909091	0.656538	1	730	tags=33%, list=5%, signal=35%	HomovsHetero	pos
															GO_SMOOTH_MUSCLE_CONTRACTION	GO_SMOOTH_MUSCLE_CONTRACTION		50	-0.539719	-1.38001	0.0793651	0.656747	1	1124	tags=18%, list=8%, signal=20%	HomovsHetero	neg
															GO_RESPIRATORY_BURST	GO_RESPIRATORY_BURST		26	0.454566	1.42676	0.0707965	0.656858	1	1297	tags=27%, list=10%, signal=30%	HomovsU937	pos
															GO_NEGATIVE_REGULATION_OF_MRNA_SPLICING_VIA_SPLICEOSOME	GO_NEGATIVE_REGULATION_OF_MRNA_SPLICING_VIA_SPLICEOSOME		20	0.484679	1.26796	0.185819	0.656863	1	4352	tags=50%, list=32%, signal=73%	HeterovsU937	pos
															GO_RENAL_TUBULE_DEVELOPMENT	GO_RENAL_TUBULE_DEVELOPMENT		45	0.425344	1.26836	0.154613	0.657078	1	595	tags=18%, list=4%, signal=19%	HeterovsU937	pos
															GO_CEREBRAL_CORTEX_DEVELOPMENT	GO_CEREBRAL_CORTEX_DEVELOPMENT		76	0.358013	1.44103	0.019802	0.657111	1	1486	tags=22%, list=11%, signal=25%	HomovsU937	pos
															GO_EXPORT_ACROSS_PLASMA_MEMBRANE	GO_EXPORT_ACROSS_PLASMA_MEMBRANE		34	-0.562566	-1.38068	0.0928482	0.657235	1	238	tags=9%, list=2%, signal=9%	HomovsHetero	neg
															GO_NEUROTRANSMITTER_RECEPTOR_INTERNALIZATION	GO_NEUROTRANSMITTER_RECEPTOR_INTERNALIZATION		14	0.538119	1.27323	0.225	0.65737	1	513	tags=21%, list=4%, signal=22%	HeterovsU937	pos
															GO_MESODERM_DEVELOPMENT	GO_MESODERM_DEVELOPMENT		63	-0.532192	-1.38099	0.0507901	0.6576	1	1198	tags=17%, list=9%, signal=19%	HomovsHetero	neg
															GO_POSITIVE_REGULATION_OF_LEUKOCYTE_MEDIATED_IMMUNITY	GO_POSITIVE_REGULATION_OF_LEUKOCYTE_MEDIATED_IMMUNITY		88	0.367369	1.42137	0.0322581	0.657831	1	1021	tags=18%, list=8%, signal=20%	HomovsHetero	pos
															GO_NEGATIVE_REGULATION_OF_MRNA_PROCESSING	GO_NEGATIVE_REGULATION_OF_MRNA_PROCESSING	Details ...	29	0.512914	1.68568	0.00869565	0.658155	1	3664	tags=52%, list=27%, signal=71%	HomovsU937	pos
															GO_NEGATIVE_REGULATION_OF_DNA_BINDING	GO_NEGATIVE_REGULATION_OF_DNA_BINDING		36	0.440092	1.48838	0.0384615	0.65821	1	2429	tags=22%, list=18%, signal=27%	HomovsU937	pos
															GO_POSITIVE_REGULATION_OF_LIPID_CATABOLIC_PROCESS	GO_POSITIVE_REGULATION_OF_LIPID_CATABOLIC_PROCESS		12	0.558775	1.26841	0.203579	0.658311	1	923	tags=42%, list=7%, signal=45%	HeterovsU937	pos
															GO_REGULATION_OF_VIRAL_ENTRY_INTO_HOST_CELL	GO_REGULATION_OF_VIRAL_ENTRY_INTO_HOST_CELL		22	-0.615091	-1.38122	0.110215	0.658327	1	187	tags=9%, list=1%, signal=9%	HomovsHetero	neg
															GO_GLYCOLYTIC_PROCESS_THROUGH_FRUCTOSE_6_PHOSPHATE	GO_GLYCOLYTIC_PROCESS_THROUGH_FRUCTOSE_6_PHOSPHATE		22	0.480538	1.26939	0.189573	0.65837	1	1883	tags=18%, list=14%, signal=21%	HeterovsU937	pos
															GO_CYTOKINE_SECRETION	GO_CYTOKINE_SECRETION		67	-0.398795	-1.23458	0.162752	0.658651	1	1841	tags=28%, list=14%, signal=33%	HeterovsU937	neg
															GO_REGULATION_OF_HUMORAL_IMMUNE_RESPONSE	GO_REGULATION_OF_HUMORAL_IMMUNE_RESPONSE	Details ...	30	-0.722675	-1.78969	0	0.328898	0.923	1001	tags=40%, list=7%, signal=43%	HomovsU937	neg
															GO_MYELOID_CELL_APOPTOTIC_PROCESS	GO_MYELOID_CELL_APOPTOTIC_PROCESS		21	0.492678	1.47768	0.0464135	0.65879	1	3	tags=5%, list=0%, signal=5%	HomovsU937	pos
															GO_RESPIRATORY_BURST	GO_RESPIRATORY_BURST	Details ...	26	0.542203	1.66338	0.0138889	0.659016	1	421	tags=19%, list=3%, signal=20%	HomovsHetero	pos
															GO_ADULT_BEHAVIOR	GO_ADULT_BEHAVIOR	Details ...	71	0.514065	1.70191	0.00531915	0.6591	1	751	tags=14%, list=6%, signal=15%	HeterovsU937	pos
															GO_NEGATIVE_REGULATION_OF_SIGNAL_TRANSDUCTION_IN_ABSENCE_OF_LIGAND	GO_NEGATIVE_REGULATION_OF_SIGNAL_TRANSDUCTION_IN_ABSENCE_OF_LIGAND		20	0.504582	1.2695	0.209246	0.659457	1	1335	tags=40%, list=10%, signal=44%	HeterovsU937	pos
															GO_FOREBRAIN_CELL_MIGRATION	GO_FOREBRAIN_CELL_MIGRATION		31	0.453416	1.26844	0.173469	0.659585	1	201	tags=6%, list=1%, signal=7%	HeterovsU937	pos
															GO_MODULATION_BY_HOST_OF_VIRAL_GENOME_REPLICATION	GO_MODULATION_BY_HOST_OF_VIRAL_GENOME_REPLICATION		13	0.556553	1.4674	0.0756014	0.659645	1	861	tags=23%, list=6%, signal=25%	HomovsU937	pos
															GO_ENGULFMENT_OF_APOPTOTIC_CELL	GO_ENGULFMENT_OF_APOPTOTIC_CELL		10	0.595619	1.46412	0.0981013	0.659792	1	1297	tags=60%, list=10%, signal=66%	HomovsU937	pos
															GO_HEAD_MORPHOGENESIS	GO_HEAD_MORPHOGENESIS	Details ...	22	0.63642	1.69342	0.0184332	0.659945	1	652	tags=23%, list=5%, signal=24%	HeterovsU937	pos
															GO_B_CELL_APOPTOTIC_PROCESS	GO_B_CELL_APOPTOTIC_PROCESS	Details ...	19	0.571111	1.63702	0.0344828	0.659962	1	1387	tags=42%, list=10%, signal=47%	HomovsHetero	pos
															GO_PRESYNAPSE_ORGANIZATION	GO_PRESYNAPSE_ORGANIZATION		23	0.471625	1.27023	0.210396	0.66019	1	573	tags=17%, list=4%, signal=18%	HeterovsU937	pos
															GO_REGULATION_OF_PHOSPHOPROTEIN_PHOSPHATASE_ACTIVITY	GO_REGULATION_OF_PHOSPHOPROTEIN_PHOSPHATASE_ACTIVITY		82	-0.381207	-1.23216	0.150729	0.660219	1	1603	tags=17%, list=12%, signal=19%	HeterovsU937	neg
															GO_LYMPH_NODE_DEVELOPMENT	GO_LYMPH_NODE_DEVELOPMENT	Details ...	10	0.696683	1.64503	0.0278552	0.660307	1	3056	tags=70%, list=23%, signal=90%	HomovsHetero	pos
															GO_SEGMENTATION	GO_SEGMENTATION		59	-0.398032	-1.23097	0.157556	0.660394	1	2090	tags=25%, list=15%, signal=30%	HeterovsU937	neg
															GO_NEGATIVE_REGULATION_OF_CYTOKINE_PRODUCTION_INVOLVED_IN_IMMUNE_RESPONSE	GO_NEGATIVE_REGULATION_OF_CYTOKINE_PRODUCTION_INVOLVED_IN_IMMUNE_RESPONSE		13	-0.532578	-1.23053	0.213172	0.660555	1	3765	tags=54%, list=28%, signal=74%	HeterovsU937	neg
															GO_ESTABLISHMENT_OF_CELL_POLARITY	GO_ESTABLISHMENT_OF_CELL_POLARITY		101	0.361808	1.26952	0.114754	0.660758	1	2158	tags=23%, list=16%, signal=27%	HeterovsU937	pos
															GO_CALCIUM_ION_IMPORT	GO_CALCIUM_ION_IMPORT		42	-0.423445	-1.22926	0.192308	0.660928	1	1899	tags=29%, list=14%, signal=33%	HeterovsU937	neg
															GO_NEGATIVE_REGULATION_OF_NUCLEOCYTOPLASMIC_TRANSPORT	GO_NEGATIVE_REGULATION_OF_NUCLEOCYTOPLASMIC_TRANSPORT		18	-0.499486	-1.23226	0.216443	0.661076	1	19	tags=6%, list=0%, signal=6%	HeterovsU937	neg
															GO_RESPONSE_TO_OSMOTIC_STRESS	GO_RESPONSE_TO_OSMOTIC_STRESS		56	-0.398439	-1.2311	0.172468	0.661142	1	2581	tags=29%, list=19%, signal=35%	HeterovsU937	neg
															GO_REGULATION_OF_SPINDLE_CHECKPOINT	GO_REGULATION_OF_SPINDLE_CHECKPOINT		12	0.566273	1.49293	0.0747663	0.661186	1	4188	tags=58%, list=31%, signal=84%	HomovsU937	pos
															GO_REGULATION_OF_LEUKOCYTE_MEDIATED_CYTOTOXICITY	GO_REGULATION_OF_LEUKOCYTE_MEDIATED_CYTOTOXICITY	Details ...	42	-0.629001	-1.82134	0	0.358785	0.996	1486	tags=31%, list=11%, signal=35%	HeterovsU937	neg
															GO_INTERLEUKIN_1_PRODUCTION	GO_INTERLEUKIN_1_PRODUCTION		65	-0.494651	-1.39801	0.0518433	0.661315	1	2788	tags=42%, list=21%, signal=52%	HomovsU937	neg
															GO_REGULATION_OF_HIPPO_SIGNALING	GO_REGULATION_OF_HIPPO_SIGNALING		13	0.535606	1.47359	0.0861538	0.661385	1	605	tags=15%, list=4%, signal=16%	HomovsU937	pos
															GO_ANIMAL_ORGAN_FORMATION	GO_ANIMAL_ORGAN_FORMATION		31	-0.578972	-1.3786	0.091687	0.661391	1	1271	tags=23%, list=9%, signal=25%	HomovsHetero	neg
															GO_RESPONSE_TO_ISOQUINOLINE_ALKALOID	GO_RESPONSE_TO_ISOQUINOLINE_ALKALOID		17	0.509069	1.26368	0.21256	0.661508	1	3684	tags=53%, list=27%, signal=73%	HeterovsU937	pos
															GO_REGULATION_OF_MAST_CELL_ACTIVATION	GO_REGULATION_OF_MAST_CELL_ACTIVATION		28	0.455385	1.47184	0.0423729	0.661578	1	3298	tags=36%, list=24%, signal=47%	HomovsU937	pos
															GO_REGULATION_OF_MRNA_POLYADENYLATION	GO_REGULATION_OF_MRNA_POLYADENYLATION		16	0.539453	1.47865	0.0747331	0.661597	1	3444	tags=44%, list=25%, signal=59%	HomovsU937	pos
															GO_CELL_MATRIX_ADHESION	GO_CELL_MATRIX_ADHESION		129	-0.503653	-1.37811	0.0322245	0.661761	1	1588	tags=22%, list=12%, signal=25%	HomovsHetero	neg
															GO_POSITIVE_REGULATION_OF_OXIDOREDUCTASE_ACTIVITY	GO_POSITIVE_REGULATION_OF_OXIDOREDUCTASE_ACTIVITY		35	-0.438562	-1.23236	0.196694	0.661883	1	1918	tags=23%, list=14%, signal=27%	HeterovsU937	neg
															GO_REGULATION_OF_INFLAMMATORY_RESPONSE	GO_REGULATION_OF_INFLAMMATORY_RESPONSE		200	-0.333062	-1.22928	0.0996932	0.661996	1	1803	tags=21%, list=13%, signal=24%	HeterovsU937	neg
[truncated: 9,638 more rows]
