# Supplementary material for: Functional and Multi-Omics Analysis of an Optimized CRISPR-Mediated FURIN Depletion in Cultured Pro-Monocytic Cells
Source: Preprints.org preprint supplement (doi:10.20944/preprints202312.0178.v1), 2023-12-04
Supplement: Supplementary file 2 [file supplementary › ST4.xlsx]

## Sheet: ST4
Gene	x	y	cluster_id	qerror	avg_WT	avg_Het	avg_Hom
CPNE4	0	1	2	0.175463	2.0004	0.321094	-1.4419
MPP3	2	2	8	0.54441	-4.01829	2.00191	-0.225895
AL117348.2	0	1	2	0.1477	2.01106	1.45783	0.811662
AC243829.1	0	2	3	0.195902	2.01831	1.75874	1.01073
SYT7	1	2	4	1.0642	0.191771	2.02061	0.501571
SPTBN2	2	2	8	0.946398	-0.222227	2.02468	0.453012
FOXP2	2	2	8	0.318141	-5.32059	2.0305	1.80358
PBX4	0	0	1	0.158068	2.03052	-2.49143	-3.76311
AC134508.2	2	1	7	0.473645	0.100102	0.926912	2.03143
PRSS51	0	1	2	0.15267	2.03174	1.32158	0.509382
SMIM25	2	1	7	0.505842	0.0813095	0.732572	2.0326
AC015687.1	1	2	4	0.6404	-0.165376	2.03263	-2.09345
JAG2	2	2	8	0.87109	0.874409	2.03302	1.29418
PDE3A	1	2	4	0.886471	0.246562	2.03958	0.0983853
AC079584.2	0	1	2	0.205991	2.03963	1.43875	0.868273
RIC3	0	1	2	0.123581	2.03964	0.720219	-1.05507
OSGEPL1	0	2	3	0.280222	1.93679	2.04226	0.734553
KCNK15-AS1	0	1	2	0.125582	2.04227	0.165059	-2.31578
WASH5P	0	0	1	0.158675	2.04344	0.589029	0.181422
CUBN	0	0	1	0.188963	2.04478	1.1067	0.885063
CCDC40	0	1	2	0.202871	2.05261	1.02868	0.046934
PLCXD2	2	0	6	0.482347	0.619401	-0.3588	2.05587
SHH	2	2	8	0.318139	0.939217	2.06074	2.04966
AC091607.2	2	1	7	0.584287	0.79077	1.05146	2.06112
AC135983.1	2	2	8	0.320345	0.894687	2.06362	1.99877
AL137002.2	0	1	2	0.191837	2.06601	1.55829	0.406176
AOC1	0	2	3	0.112199	2.07019	1.2441	-2.39612
EMC10	2	2	8	0.318343	-2.96165	2.07059	1.89435
ICAM5	0	2	3	0.17352	2.07683	1.49839	-0.330853
AP001505.1	2	1	7	0.494223	0.859012	1.29835	2.08001
SHC4	0	1	2	0.122393	2.0834	1.3176	0.10234
ITGA11	0	1	2	0.205694	2.08394	1.57256	0.345701
IQCC	2	2	8	0.340059	0.801283	1.97454	2.08707
LINC01684	2	1	7	0.469571	-5.32059	-1.90713	2.09355
F10	0	1	2	0.145154	2.09418	1.44044	0.668198
C14orf93	2	2	8	0.343836	0.960517	2.09549	1.94421
ARHGAP20	0	2	3	0.0943748	2.09651	1.49822	-1.62214
CAPN5	0	1	2	0.131787	2.09904	1.21679	-0.297173
SLC22A23	0	1	2	0.129559	2.1013	1.3665	0.124592
DNAJC12	0	2	3	0.173033	2.10294	0.197908	-5.83939
AL033527.4	1	2	4	0.711118	1.08374	2.10424	0.576071
SLAMF8	0	2	3	0.59277	0.331151	2.10855	-3.6013
TP73-AS1	0	0	1	0.196795	2.11262	-4.37409	-5.83939
NFIB	2	2	8	0.758612	-1.50266	2.11273	0.133513
FO393414.3	1	0	5	0.701899	2.11641	0.940751	1.49592
IL4I1	1	0	5	0.786644	2.11703	0.464349	1.47668
TMEM234	2	2	8	0.415028	0.939996	1.87577	2.11926
RGS9BP	0	2	3	0.13233	2.12922	2.0614	0.895261
AP005482.1	1	2	4	0.694325	-2.96883	2.13252	-5.83939
RNF212B	2	1	7	0.47152	0.559554	1.25382	2.13288
CSF1R	0	1	2	0.141931	2.14801	1.44449	0.600938
AC079250.1	0	1	2	0.119286	2.15048	1.66739	0.971206
PDE6G	0	1	2	0.186534	2.15356	1.29289	-0.618561
NRXN2	0	2	3	0.100523	2.1542	1.89624	0.641352
AC105052.5	2	2	8	0.33765	1.06758	2.06559	2.15421
TMEM202-AS1	0	2	3	0.112399	2.1591	2.07766	1.10566
MTUS1	0	2	3	0.0867582	2.16021	1.58225	-2.47646
FLVCR1-DT	0	2	3	0.112911	2.16249	2.08244	1.11864
HDAC9	2	2	8	0.392355	-2.60684	1.32101	2.16838
AC016866.1	2	1	7	0.4729	1.01325	1.51478	2.17342
LRRC56	2	2	8	0.463829	1.03603	1.878	2.17521
C1orf226	0	1	2	0.1784	2.1803	1.49778	0.0317701
RSAD2	0	2	3	0.189396	2.17921	2.18115	0.379489
RBMS2	2	0	6	0.442214	1.05232	1.0312	2.18471
LRRC6	2	2	8	0.450027	-0.00502796	2.1866	1.57391
TRHDE	0	2	3	0.40659	1.91205	2.18811	0.646744
NMNAT2	0	2	3	0.126763	2.19371	1.85798	-3.31864
COL19A1	0	1	2	0.15865	2.19461	0.108264	-4.00877
TMCC3	0	1	2	0.139561	2.20164	1.76844	0.989837
RUNDC3B	1	0	5	0.66343	2.20232	1.15087	1.55166
OVGP1	0	0	1	0.356247	2.20387	0.937378	0.870667
XAF1	0	2	3	0.47541	1.89808	2.21058	0.847498
GRIN1	1	2	4	0.717438	0.229607	2.21588	-0.714044
TC2N	1	2	4	0.605439	-0.251344	2.21849	-5.31106
NUDT7	0	2	3	0.576287	1.68095	2.22287	0.416287
NAALADL2	2	2	8	1.04969	-0.48654	2.22446	0.0882575
SLC22A18AS	2	0	6	0.93715	1.97577	0.553041	2.22958
AKR7A3	0	2	3	0.129952	2.23638	2.17739	1.21002
AL359644.1	2	2	8	0.361997	1.12119	2.2392	2.05198
DCHS1	0	1	2	0.124815	2.24301	1.03665	-0.926354
IL12RB1	1	0	5	0.848267	2.24525	0.0481221	1.58426
AC008105.3	2	2	8	0.512982	0.298223	1.64553	2.24897
RPL10P9	0	0	1	0.202797	2.25092	1.34499	1.14737
ALDH1A1	0	2	3	0.172134	2.2516	0.628139	-4.53709
RTN2	0	1	2	0.13198	2.25695	1.69301	0.980196
MIR3936HG	0	0	1	0.123827	2.25855	1.42445	0.999502
ATP2C2	0	2	3	0.493766	1.13091	2.25908	-2.39612
AC002454.1	0	2	3	0.542362	1.42981	2.26082	-0.744721
ANK1	0	2	3	0.144252	2.2628	2.20487	0.90623
SLPI	0	2	3	0.421703	1.25845	2.26411	-3.02094
MAP1A	0	1	2	0.156697	2.26738	1.49993	0.636354
C3	0	0	1	0.291775	2.27136	0.916691	0.758684
MT-TP	0	2	3	0.086953	2.27525	2.13035	1.10208
HPD	2	2	8	0.473465	1.01143	1.93353	2.27594
GPR176	0	2	3	0.206919	2.1404	2.28135	-5.83939
PCED1B	2	0	6	0.701778	1.499	0.174227	2.28205
AC021231.1	0	2	3	0.157182	2.28626	2.21097	-0.234679
SEMA3C	1	0	5	0.998788	2.28888	-1.72575	1.90238
WNT3	2	2	8	0.928352	-3.20731	2.28995	-1.47299
CNRIP1	2	1	7	0.479261	-2.03304	0.355224	2.29443
PLXNB3	0	0	1	0.193215	2.29572	1.09566	0.818926
HERC6	0	2	3	0.408913	1.97004	2.29576	0.494486
SYP	0	1	2	0.176324	2.30692	1.07247	-0.219609
IRGM	2	0	6	0.464155	0.974767	0.152465	2.31171
CHN1	0	2	3	0.251577	2.21978	2.31202	0.68428
AC006252.1	0	2	3	0.119299	2.31331	2.0486	0.938564
CARMN	1	2	4	0.820162	1.00416	2.319	0.733589
OXR1	1	2	4	0.604465	1.01762	2.32162	-1.1777
PHLDA1	0	0	1	0.500984	2.32387	1.02153	1.1189
ZBTB7C	0	1	2	0.191746	2.33021	1.01084	-1.98198
KCNJ15	2	2	8	0.353281	1.20909	2.33206	2.16122
HOXA3	2	1	7	0.487897	0.607664	1.25687	2.33314
KHDC1	2	2	8	0.334628	0.788777	2.22008	2.33367
KIT	2	2	8	0.626964	1.25698	2.35434	1.87066
AL136181.1	0	1	2	0.126084	2.35584	0.728934	-1.94813
LINC02693	0	0	1	0.134499	2.35589	0.582378	-0.375397
KIFC3	0	2	3	0.190875	2.36079	1.21591	-2.15046
UFSP1	1	0	5	0.697424	2.36302	1.32645	1.80662
GBP5	0	0	1	0.348217	2.36582	-3.05677	-3.38394
ADRA2C	0	1	2	0.254068	2.3699	1.66027	1.07774
AL662844.4	2	2	8	0.469414	0.794945	1.95284	2.37388
AC093673.1	2	0	6	0.519947	1.34497	1.45852	2.37852
CCDC74A	0	0	1	0.12999	2.38076	1.57763	1.31007
PSTPIP2	2	2	8	0.586173	-1.31256	2.38163	0.880177
GPM6B	0	1	2	0.223841	2.38563	2.07076	1.2585
AC004585.1	0	2	3	0.116937	2.39146	2.20562	-0.192901
SH3TC2	0	2	3	0.110429	2.3994	2.24311	0.439258
STX1A	2	0	6	0.418369	1.28328	1.19403	2.40007
ULBP1	0	2	3	0.543162	2.01594	2.40365	1.00424
AC011505.1	0	2	3	0.0934194	2.40917	1.0965	-5.83939
AC004233.2	2	0	6	0.51838	1.22443	1.3523	2.41116
DENND5B	2	2	8	0.354676	-5.84891	1.43563	2.41332
SDS	0	0	1	0.173217	2.41681	1.49908	0.919563
AC090152.1	2	0	6	0.428414	0.153795	0.0374884	2.41924
AL031778.1	0	1	2	0.119072	2.42203	1.94498	1.24638
LINC01107	0	2	3	0.595654	1.07929	2.42216	-1.86457
RAB40B	0	2	3	0.0861392	2.42459	2.18475	0.62699
SLC7A8	0	2	3	0.146114	2.42514	2.01285	0.530393
WHRN	0	2	3	0.122895	2.4286	2.2235	-0.719732
AL138756.1	2	2	8	0.318538	0.715598	2.4318	2.36637
LINC01277	1	2	4	0.779978	0.186118	2.43259	-0.477596
SYT12	1	2	4	0.703087	1.26791	2.43362	0.652946
AC090204.1	0	1	2	0.124359	2.43386	-0.320306	-4.78274
AC016924.1	0	1	2	0.125845	2.43463	1.57734	0.44682
TLE6	0	0	1	0.112622	2.43518	1.27288	0.823513
AC098820.2	0	0	1	0.308933	2.43593	-0.889782	-1.21912
TMEM145	1	0	5	0.636962	2.43597	1.12722	1.44348
ITGAD	2	2	8	0.445036	-1.37275	1.51971	2.43772
PCSK4	0	2	3	0.0947623	2.43915	2.30129	1.09563
CACNA1D	2	1	7	0.486649	0.506982	1.24134	2.44067
PRH1	0	1	2	0.188289	2.44138	1.89852	1.35288
NKX3-1	2	1	7	0.529346	-0.410451	1.48343	2.4417
AC079305.3	0	2	3	0.0969033	2.44188	2.2073	1.02128
INSM1	0	2	3	0.0984603	2.44346	1.05586	-5.83939
ALDH3A2	0	2	3	0.534464	0.198949	2.44351	-5.83939
RILPL1	0	1	2	0.127419	2.44691	1.93327	1.07888
AC105233.5	0	2	3	0.212531	2.42246	2.44764	1.32607
EFNB2	2	2	8	0.482409	-1.329	1.39125	2.44795
AC002464.1	0	1	2	0.129806	2.44806	1.92769	1.04665
KLLN	2	0	6	0.403516	1.32599	1.16993	2.45273
AGT	0	1	2	0.15248	2.45459	0.0793176	-4.4769
ANKFN1	0	0	1	0.383426	2.45788	-2.00012	-2.12175
LINC02649	2	2	8	0.387137	1.36241	2.27318	2.46007
CREB5	0	0	1	0.216628	2.46687	1.4507	0.711718
AADACL2-AS1	2	0	6	0.456842	0.857631	0.875308	2.47149
MYLK2	2	1	7	0.469384	1.40235	1.93021	2.4747
AC124016.2	2	1	7	0.478988	0.388239	1.538	2.47537
ESRRB	0	1	2	0.162027	2.47865	1.7892	0.408094
AC012618.3	2	0	6	0.584034	0.455913	0.836992	2.48195
MATN4	0	2	3	0.205166	2.48244	2.12846	1.14471
KLHL30	1	2	4	0.751955	-0.386401	2.48668	-1.44427
TNFRSF19	0	2	3	0.087009	2.48882	2.16464	0.199726
C8G	0	1	2	0.142621	2.4889	1.04973	-0.670296
WAKMAR2	0	1	2	0.193308	2.49225	1.55402	0.626393
DMGDH	1	0	5	0.905234	2.49335	1.00949	2.16106
AC006460.2	0	2	3	0.0872206	2.49502	2.25456	0.809513
RASGRF1	0	2	3	0.411044	1.91535	2.49596	-0.687064
MYO3B	0	2	3	0.125517	2.50225	2.27324	-1.17593
UGT8	0	2	3	0.131283	2.52147	2.24944	1.18978
AL137025.1	2	1	7	0.482449	0.947922	1.8361	2.52611
DLX2	0	1	2	0.119395	2.52764	1.4859	-0.00886923
MTUS2	1	2	4	0.908817	0.542207	2.52981	0.450782
AC068875.1	0	2	3	0.0997622	2.54206	1.25309	-5.06541
OLFML2B	0	1	2	0.120824	2.54854	0.94289	-1.29049
PYHIN1	0	1	2	0.12232	2.55351	1.09452	-0.895039
APCDD1	0	1	2	0.206668	2.55482	1.63759	-0.571518
LINC01399	0	0	1	0.126252	2.55611	-2.46825	-5.06541
MARCO	0	2	3	0.128302	2.55626	2.22991	-2.95213
LRRC25	2	0	6	0.485358	0.917758	1.0158	2.55636
TIRAP	2	1	7	0.585336	1.47103	1.69332	2.56222
TNFSF10	0	1	2	0.220797	2.56396	2.26008	1.48565
NDFIP2	2	2	8	1.01196	0.158428	2.56782	0.748693
RFTN2	0	2	3	0.228252	2.49698	2.56923	0.58809
TMEM51	0	2	3	0.0869768	2.56978	2.31083	0.471046
KLRF1	2	1	7	0.469024	0.916199	1.70011	2.57082
WNT4	2	1	7	0.510288	1.38072	2.13178	2.57352
TRIM73	1	0	5	0.654208	2.57781	1.13921	1.64382
CX3CR1	0	2	3	0.186198	2.58019	1.91224	-0.0896838
PNMA6A	2	2	8	0.39328	-3.63913	2.58592	1.25733
MS4A6A	1	0	5	0.970648	2.58625	1.30466	2.41283
FSIP1	0	1	2	0.151807	2.58982	2.00807	0.895707
PCYT1B	0	1	2	0.133353	2.58994	0.867846	-2.11712
PLXNB2	1	2	4	0.648865	0.319733	2.59041	-1.51896
CACNA2D3	0	0	1	0.364768	2.59797	-3.47926	-3.75046
ALDH1A2	1	0	5	0.695905	2.60051	0.243535	1.328
SLFN5	2	0	6	0.51296	1.4306	1.54825	2.60307
ACTL8	0	2	3	0.107756	2.60521	2.28801	-1.21047
RTN1	2	2	8	0.471776	-0.527396	2.6055	1.65973
SPIN2B	0	1	2	0.166907	2.60808	1.97995	1.30005
AC124067.4	2	0	6	0.788373	2.11166	0.902074	2.61103
KLHL31	0	1	2	0.224563	2.61179	2.05442	1.55474
TRGV9	2	0	6	0.954341	2.40727	1.034	2.62031
F13A1	0	0	1	0.216114	2.62095	-0.935331	-3.51746
NTSR1	0	0	1	0.110646	2.62247	1.88744	1.59448
APLN	2	1	7	0.515433	1.38718	1.77612	2.6229
EYS	0	1	2	0.210748	2.6235	1.43443	0.322192
ADTRP	1	2	4	0.940395	0.432516	2.62803	0.438433
KIF17	0	0	1	0.13117	2.62862	0.310425	-0.92062
RBPJL	0	2	3	0.108062	2.63149	2.54617	1.60025
FIBCD1	0	2	3	0.17725	2.63517	2.59752	-0.955757
NBPF20	0	2	3	0.555721	2.12535	2.63945	0.840456
AC215522.2	2	0	6	0.71515	2.0709	1.05353	2.64127
AC009303.2	1	2	4	0.604373	1.06347	2.64277	-1.63395
PLEKHA7	0	2	3	0.170359	2.64409	2.60864	0.569829
AC245123.1	0	1	2	0.185822	2.64843	-0.718063	-4.12962
ZNF846	0	1	2	0.127529	2.64882	1.41352	-0.194549
ROPN1L	0	0	1	0.233206	2.64954	1.56585	0.737486
FAM151B	0	0	1	0.110084	2.65087	1.88088	1.57044
GPR68	2	0	6	1.06991	2.63801	1.47178	2.65237
SEMA6C	0	2	3	0.221162	2.6133	2.65405	1.30451
AC116562.4	0	2	3	0.295508	2.53696	2.65535	1.38426
MYLK	1	2	4	0.80463	1.46158	2.66067	1.1753
BIRC3	1	0	5	0.663902	2.66575	1.11188	1.70636
APOBEC3G	1	2	4	0.604347	1.92505	2.68211	0.525504
SYNPO	0	2	3	0.0972175	2.68348	1.9169	-1.94491
DLG2	0	0	1	0.514254	2.68363	1.51446	1.61459
IQSEC2	0	2	3	0.172304	2.6851	2.31193	1.12555
AC073578.2	0	0	1	0.233157	2.68836	1.58138	1.38091
ANKRD22	2	0	6	0.667836	1.75494	0.368351	2.69024
CTSV	2	2	8	0.462952	-2.86515	2.69086	1.06313
GRIN3A	0	0	1	0.171514	2.69196	0.967528	-0.114875
RAD23BP3	2	0	6	0.539622	1.45623	1.62434	2.69743
TOGARAM2	2	0	6	0.564214	1.2393	1.48043	2.69779
CD22	2	0	6	0.788237	1.97101	0.211065	2.69803
LHFPL2	0	0	1	0.143311	2.70707	1.96639	1.54978
CYTL1	0	0	1	0.448026	2.70919	0.541154	0.606559
AC008875.2	2	1	7	0.479075	1.5169	2.17601	2.71268
C11orf74	0	2	3	0.107369	2.71299	2.53392	1.71464
FBXO32	0	0	1	0.109597	2.71381	1.86705	1.52144
AL139383.1	0	0	1	0.306648	2.71577	0.311168	0.067472
DAPK2	0	2	3	0.107309	2.71709	2.50692	0.206527
AL691447.2	1	2	4	0.72297	1.08668	2.71733	0.342598
KCNG1	0	1	2	0.134501	2.71975	-1.09169	-5.83939
AF117829.1	0	1	2	0.168561	2.72258	1.86859	0.108672
CA13	1	2	4	0.657858	1.45862	2.72358	0.511887
AFF3	1	2	4	0.720451	-1.95443	2.72573	-4.12962
AP000943.2	0	0	1	0.183139	2.72635	0.726215	-0.580686
LINC00514	2	1	7	0.469795	0.432802	1.57963	2.73361
CLNK	2	0	6	0.489706	-4.79227	-4.29024	2.74856
GLIS1	1	2	4	0.605208	1.72707	2.74882	-0.335246
PRKN	2	2	8	0.588996	-3.85648	2.74883	0.0482752
AC092723.4	0	2	3	0.0977501	2.7577	2.39167	0.558688
MAPK8IP2	0	1	2	0.172555	2.75836	2.07865	1.35773
ARHGAP42	2	2	8	0.524714	-0.433052	1.73911	2.76265
GJA3	2	2	8	0.637713	0.479886	2.76698	1.73854
RASGRP1	0	1	2	0.167578	2.76743	2.37597	1.57262
MYCL	2	2	8	0.476753	1.45547	2.76785	2.36516
KITLG	2	2	8	0.422195	-5.84891	0.915015	2.76805
CCDC102B	2	2	8	0.80426	1.38059	2.76851	1.95805
DNAJC5B	0	1	2	0.238031	2.76876	1.83985	1.04018
AC112482.2	0	2	3	0.110746	2.77025	2.46449	-1.08357
TESPA1	0	0	1	0.236786	2.77187	0.973891	0.655881
PTPRVP	0	2	3	0.284668	2.664	2.78047	1.39894
EHD2	1	2	4	1.01838	0.954149	2.78099	1.15739
MAGEH1	0	1	2	0.125951	2.78605	1.36084	-0.98168
AC245187.2	0	0	1	0.146658	2.78738	-2.21244	-5.06541
AP001574.1	0	2	3	0.107895	2.79576	2.06169	-1.28246
ENO2	1	2	4	0.988903	-1.24824	2.79597	-0.95763
ZNF792	2	2	8	0.492673	-2.00269	1.40542	2.79668
TES	2	1	7	0.474603	1.1903	1.87384	2.80558
MEF2C-AS1	1	0	5	0.640786	2.80662	0.849028	1.40583
FGL1	0	1	2	0.168088	2.80762	0.864661	-3.13134
LPAL2	0	1	2	0.120085	2.80821	1.08621	-1.55307
PROB1	0	1	2	0.15073	2.80918	2.32854	1.4142
AL034397.2	1	0	5	0.637131	2.81263	1.2948	1.66672
PRUNE2	0	1	2	0.182718	2.81551	0.838504	-1.18596
RAPGEF4-AS1	0	1	2	0.18618	2.81709	1.65884	-0.909795
THBS3	0	2	3	0.273628	2.73204	2.82294	1.6142
FRMD4A	0	1	2	0.130631	2.82461	1.14891	-1.70443
AL009179.2	2	2	8	1.0583	1.72358	2.8254	1.94877
ICA1L	1	0	5	0.778197	2.82793	1.59812	2.33609
ZXDA	0	2	3	0.133515	2.82804	2.44612	0.977204
AC013565.1	0	0	1	0.127094	2.82877	-2.52844	-5.31106
TTC28	0	2	3	0.134351	2.82929	2.01719	-1.09164
CDH26	0	1	2	0.121419	2.83084	2.30281	1.57465
GTF2IRD1	1	2	4	0.849642	-2.98601	2.83314	-3.84696
PLCD1	0	2	3	0.1659	2.83486	2.80849	1.60215
AC108516.2	2	1	7	0.552236	1.6047	1.91581	2.83693
SPATA24	0	2	3	0.154446	2.83891	2.51682	1.40544
BCL3	1	0	5	0.950288	2.84203	1.59201	2.63811
DARS-AS1	0	2	3	0.0882258	2.84483	2.68514	1.49278
CD101	1	0	5	0.822217	2.84688	1.17866	2.28512
HTRA1	0	2	3	0.114101	2.84937	2.31202	-4.29143
MYH10	0	2	3	0.223939	2.77275	2.85562	0.31837
SLC49A3	0	2	3	0.118195	2.85824	2.39848	0.456295
NR2F1-AS1	2	0	6	0.941329	2.58722	1.01534	2.85866
ZNF470	2	2	8	0.494139	-1.65935	1.54538	2.86272
B3GNT8	2	1	7	0.491628	1.18914	1.80304	2.86505
AL096803.2	0	1	2	0.126752	2.86513	2.28756	1.53133
VWA5A	0	1	2	0.136846	2.87004	1.87449	0.650052
ADAMTS13	0	2	3	0.114238	2.87362	2.67611	1.81857
CIB2	1	2	4	0.609192	1.90476	2.87612	0.580901
CXCL8	1	0	5	0.656416	2.87642	0.045606	1.06089
EXPH5	0	2	3	0.485727	1.56967	2.87653	-2.64628
C8B	0	1	2	0.17499	2.87838	0.0820971	-5.83939
CASD1	0	1	2	0.201703	2.87856	2.3429	1.82741
CFAP61	0	2	3	0.21942	2.88666	1.42174	-2.43664
HLA-DRB1	0	2	3	0.116025	2.88721	2.59677	-1.09288
PIK3R6	0	2	3	0.218162	2.85835	2.89409	1.59541
TBC1D29P	2	0	6	0.564157	1.70219	1.89936	2.89525
AL592429.2	0	2	3	0.189661	2.8955	2.89789	1.09156
AC110048.2	0	1	2	0.138727	2.90085	2.30768	1.24643
LAMA5	2	2	8	0.595718	-0.961373	2.90167	1.3002
CSMD1	0	0	1	0.284278	2.90392	1.29448	1.09413
FAM178B	2	0	6	0.499153	0.249952	0.464203	2.90413
GNA11	0	0	1	0.147767	2.90546	-3.2336	-5.06541
TCEA3	0	2	3	0.192714	2.89283	2.906	-0.227891
CEP70	1	2	4	0.884586	-1.2971	2.91315	-1.65846
CD302	0	2	3	0.312806	2.57969	2.91338	-0.203767
GOLGA6L9	0	1	2	0.124004	2.92301	2.41344	1.59065
PTPRH	0	2	3	0.142239	2.93115	2.27083	-0.151429
FAM227B	0	2	3	0.207766	2.93642	2.47885	1.21983
COL4A1	0	0	1	0.242277	2.94101	0.20207	-1.94813
ACVR2A	0	2	3	0.116288	2.94406	2.42313	0.193753
GPR85	0	0	1	0.109539	2.94412	1.23366	0.478501
FGFR3	1	2	4	1.057	1.46374	2.95026	1.7023
PRDM13	2	2	8	0.332438	-5.84891	2.36374	2.95576
SULT1B1	2	0	6	0.721787	2.39639	1.37166	2.95587
CLIC2	0	0	1	0.324606	2.95826	1.55937	1.44279
AL353807.3	0	2	3	0.151609	2.95965	2.71917	1.87787
ANKS1B	0	2	3	0.513888	2.20799	2.96069	0.0269498
AC245100.3	0	1	2	0.1402	2.96675	1.65021	-0.724331
AC100808.1	1	0	5	0.813662	2.96932	1.16716	2.34086
MRPS30-DT	0	2	3	0.373454	2.76182	2.9736	1.60024
AQP4-AS1	2	0	6	0.482132	1.74884	0.912008	2.97913
RPL10P16	0	0	1	0.391242	2.98609	1.9451	1.92415
ZNF658	0	1	2	0.182257	2.98702	2.04046	1.06966
RORB-AS1	1	0	5	0.740085	2.98741	1.96317	2.5169
TWIST2	0	2	3	0.361093	2.16375	2.98821	-2.70647
LIMS2	1	2	4	0.638212	0.310749	2.99441	-2.09544
BLNK	0	0	1	0.111963	2.99557	-0.685876	-2.12217
LINC00886	2	2	8	1.03386	0.6144	2.99867	1.15314
SSH3	2	0	6	0.394463	1.618	1.27576	3.00187
ZNF530	2	2	8	0.366794	1.26973	2.76306	3.00523
MAFB	2	0	6	0.784786	2.16766	0.170559	3.00534
TSPOAP1	2	2	8	0.387164	1.34116	2.72323	3.00689
TNF	2	0	6	0.583493	1.76296	0.411584	3.02763
SOWAHC	0	2	3	0.106151	3.03707	2.60762	-2.00131
TNFRSF14-AS1	2	0	6	0.426909	1.64638	0.985878	3.04871
FOXN4	0	2	3	0.220519	2.9869	3.05325	0.813422
MEFV	2	0	6	0.495919	1.91299	1.07858	3.05608
TMEM99	0	1	2	0.149511	3.05656	2.59977	1.73587
SMPD5	2	0	6	0.752588	2.41968	1.09301	3.05842
SLC6A8	0	1	2	0.119491	3.05871	1.98964	0.460596
ARID3C	2	0	6	0.45977	0.423043	0.466626	3.07536
TMEM9B-AS1	0	1	2	0.119384	3.07962	2.61687	1.95263
DRP2	0	0	1	0.226707	3.08251	2.16723	1.481
AC027601.1	2	2	8	0.33451	-1.40104	3.08271	2.58514
TCP11L2	0	0	1	0.121376	3.0875	1.12709	0.43164
IL21R	0	0	1	0.157527	3.09182	1.63816	1.22811
CYB5A	2	2	8	0.318729	-5.84891	3.08921	3.09199
SERINC2	0	2	3	0.254166	3.02655	3.09229	1.97546
FBXO36	2	2	8	0.53165	1.2732	2.49965	3.09467
LINC00598	0	1	2	0.166379	3.09587	2.434	1.08271
NOS3	0	0	1	0.235606	3.09615	1.87241	0.930335
SLC27A3	0	2	3	0.111746	3.09672	2.89351	1.99499
AC008667.1	2	1	7	0.480318	1.95968	2.59212	3.09787
LGALS9B	2	0	6	0.459822	1.25337	1.28402	3.10765
LINC01264	0	2	3	0.0873134	3.11371	2.84528	0.908292
PARD6B	2	1	7	0.507528	1.78496	2.6157	3.11584
TREX2	0	0	1	0.224418	3.12133	1.61663	1.32858
ADAMTS6	0	1	2	0.142111	3.12717	2.66953	1.83566
HLA-K	0	2	3	0.123334	3.13042	2.90616	1.98986
SRRM3	0	1	2	0.12669	3.13125	2.46041	1.351
AC138150.1	2	2	8	0.324524	1.55057	3.1331	3.00975
ZNF462	2	2	8	0.320005	-3.44902	3.13776	2.789
ESYT3	0	2	3	0.163118	3.14105	2.92477	-5.83939
SOCS2	0	2	3	0.232492	3.08909	3.14555	1.741
SAMD13	0	1	2	0.14113	3.14706	2.61531	1.97526
ALG1L9P	0	0	1	0.178163	3.15691	2.49814	2.07493
ST20-AS1	0	2	3	0.0928901	3.15711	3.03269	1.98574
DNAJA4	1	2	4	0.682632	1.28543	3.15816	0.135071
ASNSD1	0	2	3	0.116464	3.15993	3.08404	2.11258
EML1	0	1	2	0.215578	3.16227	0.544474	-1.8678
MAPK11	0	0	1	0.167875	3.171	1.45575	0.999338
CYP1B1-AS1	0	0	1	0.440882	3.17194	2.14729	2.17187
AC091563.1	0	0	1	0.214645	3.17999	1.96249	1.71498
AC021752.1	0	2	3	0.101422	3.18139	3.03084	1.54173
AC009404.1	0	1	2	0.238723	3.18337	2.28815	1.51908
NBDY	0	1	2	0.11908	3.19333	0.433719	-3.6013
RASSF8	2	1	7	0.563596	1.99509	2.27704	3.19367
SPATC1	2	0	6	1.00548	3.07557	1.70805	3.19768
TNRC6C-AS1	2	1	7	0.471159	0.0919691	1.68345	3.20215
ZBTB42	2	2	8	0.417244	2.03324	2.95919	3.20407
CFAP161	0	0	1	0.254817	3.20528	2.11326	1.94248
ZNF674-AS1	0	0	1	0.220073	3.20529	2.17009	1.9665
SPESP1	0	1	2	0.206016	3.20909	2.87669	2.07822
ICAM3	2	2	8	0.450179	1.61496	2.82143	3.21609
IFT22	0	0	1	0.173426	3.21814	2.38477	1.85812
DNAJB5	1	2	4	0.909522	1.95963	3.21901	1.90312
GAS1	2	0	6	0.394505	2.10837	1.85436	3.22295
ZNF44	2	1	7	0.505726	1.74406	2.66456	3.22742
C10orf91	2	2	8	0.941816	0.635915	3.22917	1.42513
LZTS3	0	1	2	0.182934	3.23632	2.50359	1.75381
XKR8	0	2	3	0.327207	3.05301	3.2382	1.67489
ATP6V0E2-AS1	2	0	6	0.415446	1.9857	1.87344	3.24141
PPIL6	0	0	1	0.12183	3.24625	2.39891	2.09941
MT-ATP8	0	2	3	0.269724	3.16508	3.2512	2.05438
SLC22A4	0	0	1	0.125861	3.25691	2.36073	1.89854
CD86	2	0	6	0.636912	1.4992	-0.821652	3.26268
ZC3H12B	0	0	1	0.130996	3.2635	1.9192	1.47434
MYO16	0	0	1	0.488447	3.27127	2.22724	2.29446
CNR2	2	2	8	0.454551	1.05652	2.71577	3.27229
NCF1B	2	0	6	0.478823	0.690742	-1.03846	3.27836
ART3	0	1	2	0.222829	3.2824	1.63055	-2.61348
GLI1	2	0	6	0.507909	1.70894	1.85577	3.28276
AC005532.1	0	0	1	0.209697	3.28372	2.10606	1.26775
AC024558.2	0	1	2	0.237703	3.28594	2.71306	2.2194
SV2B	0	0	1	0.172321	3.30872	1.98705	1.64403
KYNU	0	2	3	0.304525	2.837	3.3094	-1.39486
TBC1D30	2	2	8	0.77947	1.53814	3.31593	2.31305
RAD51-AS1	0	2	3	0.0915688	3.31929	3.20631	2.2831
SUOX	2	2	8	0.410907	2.0866	3.07263	3.32135
ADAMTS10	2	0	6	0.586906	2.10729	2.33992	3.32328
LINC02577	0	2	3	0.140433	3.32986	2.73972	0.554223
TMPRSS9	0	2	3	0.289177	3.23017	3.33118	2.18319
COL18A1	1	2	4	0.67493	2.11987	3.33426	1.32837
TNS1	1	2	4	0.624066	1.78926	3.33516	0.161603
PPP4R1L	0	1	2	0.146187	3.3357	2.4208	1.34503
CXCR2	0	1	2	0.155905	3.33992	2.96298	2.22836
CERKL	0	2	3	0.158361	3.34252	2.90355	1.41689
RPS10P7	0	1	2	0.150501	3.34277	2.85079	2.28302
FFAR2	2	0	6	0.527933	1.47905	-0.10164	3.34402
ZFAND4	0	2	3	0.188083	3.34639	2.82016	1.25515
TREML2	1	0	5	0.717332	3.34718	1.52734	2.43981
AC144652.1	2	1	7	0.548498	1.79439	2.19676	3.35215
PECR	0	0	1	0.119913	3.3528	2.52937	2.12061
AC025287.1	2	1	7	0.469921	2.1881	2.77049	3.35287
LMTK3	0	0	1	0.458249	3.35366	2.02026	2.07217
IL6ST	0	1	2	0.155627	3.35393	2.99773	2.30441
LY9	0	1	2	0.119252	3.35581	2.79212	1.97855
MYOF	0	0	1	0.119049	3.36114	0.738674	-0.209864
ZDHHC11	0	1	2	0.137703	3.3619	1.35342	-2.21928
AC021851.2	0	2	3	0.195068	3.34963	3.36342	1.21135
ZNF114	2	1	7	0.471239	2.34387	2.79731	3.36659
FBXO44	0	1	2	0.212683	3.36941	2.75212	1.22922
CYP2S1	0	0	1	0.113241	3.37459	2.56997	2.26134
SAMD4A	0	0	1	0.116197	3.37506	2.49613	2.16975
AC008632.1	1	0	5	1.04689	3.37999	0.370545	3.29782
KLKB1	0	2	3	0.219442	3.38173	2.89497	1.61303
MLH3	2	0	6	0.572839	1.97237	2.2212	3.39131
AC083843.3	0	1	2	0.119163	3.39136	2.91532	2.22482
BACH2	2	0	6	1.06256	3.36867	2.22339	3.3925
DZANK1	0	2	3	0.295909	3.27826	3.40608	2.03849
GPR137C	2	2	8	0.511326	1.97171	2.96804	3.41103
GOLGA7B	1	0	5	0.648303	3.41347	1.85133	2.36189
C5AR1	1	0	5	0.821563	3.43054	2.27026	3.03877
LINC00174	0	0	1	0.139792	3.43178	2.66959	2.24754
CCSER1	1	0	5	0.67733	3.43993	2.27564	2.76297
LINC02218	1	0	5	0.658885	3.44429	0.913097	1.84197
IL17D	0	1	2	0.146338	3.44514	3.00737	2.19223
RIPK2	0	1	2	0.18477	3.44742	1.98413	-1.24236
B9D1	0	2	3	0.299536	3.28641	3.45578	1.69889
FCMR	0	0	1	0.124266	3.45825	1.65509	1.02954
RGCC	1	2	4	1.00797	-1.1047	3.46763	-0.658768
OR52K3P	0	0	1	0.186026	3.46847	1.76449	1.35512
SEMA6A	0	0	1	0.203655	3.46941	2.59167	1.97856
PTPN14	0	2	3	0.316038	3.22946	3.47072	1.26992
LINC02814	0	0	1	0.569856	3.47638	1.55719	1.80688
ADRB1	2	0	6	0.530391	2.33232	2.4742	3.47978
GPR155	0	1	2	0.167198	3.48222	2.84119	1.52784
GDAP1	0	2	3	0.170372	3.49115	2.76892	0.45317
RGS16	0	1	2	0.152035	3.49801	3.04542	2.52645
CMPK2	0	2	3	0.0863379	3.49989	3.19844	1.14422
AL356414.1	0	1	2	0.124265	3.50618	2.61034	1.16015
ZNF573	0	0	1	0.635301	3.52431	2.13122	2.38261
KRT10	0	1	2	0.248457	3.52536	2.91208	2.40024
CD226	1	2	4	0.964152	0.825843	3.5389	0.927101
NIPSNAP3B	0	2	3	0.491976	2.71307	3.54054	0.1081
NRP2	0	2	3	0.109683	3.54486	2.89289	-4.53709
DPY19L2P2	1	2	4	0.875812	0.300062	3.55043	-0.0277746
KBTBD8	1	0	5	0.892934	3.55876	2.48206	3.29985
SLC9A9	0	0	1	0.233495	3.55897	2.50393	1.69678
DHRS13	2	0	6	0.529543	2.48681	2.61821	3.55903
PLCD3	2	1	7	0.483042	2.13299	2.93913	3.56062
ZNF827	2	2	8	0.369603	-1.0313	2.89918	3.56088
CCN3	1	0	5	0.637518	3.56878	2.55129	2.80722
AATK	0	1	2	0.121055	3.57039	1.61703	-1.09055
LINC01963	2	1	7	0.518704	1.03033	1.81617	3.57658
MFAP4	1	2	4	0.954421	0.0620437	3.57674	0.144029
ZBTB16	0	2	3	0.552477	2.12217	3.58129	-1.56513
SHANK2	0	2	3	0.203121	3.50329	3.58245	-2.12175
TRIM9	0	1	2	0.125019	3.58478	3.06738	2.22389
GPR135	0	0	1	0.111371	3.59279	2.8528	2.51422
TRIP6	1	0	5	0.727533	3.59441	2.26228	2.95425
PPFIA4	1	2	4	0.604477	2.86382	3.59446	1.63571
ADGRE1	2	0	6	0.394705	2.09126	1.69813	3.61365
NKAPP1	1	0	5	0.642158	3.61447	2.25097	2.65187
AC093512.2	2	2	8	0.496685	2.54694	3.61864	3.26907
VSIG4	1	0	5	0.828825	3.62253	2.33303	3.20014
TBC1D9	0	1	2	0.12625	3.62548	3.11079	2.26269
ZNF331	0	0	1	0.176881	3.62747	2.08252	1.09438
OTUD7A	0	2	3	0.154014	3.63177	3.54164	0.898604
CHST7	0	1	2	0.223415	3.6367	1.86252	0.266418
DAB2IP	2	1	7	0.513044	1.16719	2.73645	3.63858
IL18RAP	2	0	6	0.417035	1.30737	1.11113	3.63898
DIRAS1	0	0	1	0.307552	3.63952	-1.66935	-2.2025
TANC1	0	2	3	0.20543	3.58995	3.65	-0.104735
AC008537.1	1	0	5	0.841505	3.65073	2.47455	3.28601
PLS1	2	1	7	0.500647	2.60471	3.24665	3.65738
ZFP14	0	2	3	0.104331	3.65934	3.20997	-1.46484
AL109809.5	0	0	1	0.161728	3.66648	2.94117	2.50184
GAL	0	2	3	0.242352	3.35924	3.67052	-2.71365
AC108047.1	0	2	3	0.0987823	3.67373	3.43996	2.28229
AC012513.3	2	1	7	0.521398	1.74891	2.33774	3.68777
CSGALNACT1	0	1	2	0.173902	3.692	3.04409	1.6783
DIPK1B	2	2	8	0.321667	2.39718	3.69214	3.60938
PDGFA	2	0	6	0.44091	2.6028	2.5793	3.69557
PDZD2	0	2	3	0.138707	3.69754	3.61128	1.91317
ADCY10P1	0	1	2	0.122683	3.69943	3.29695	2.65609
SGK1	1	0	5	0.911749	3.70379	2.22297	3.38515
GSTA4	0	1	2	0.125526	3.70511	3.04389	1.96105
IDNK	0	0	1	0.112531	3.71471	2.87181	2.54553
MEF2C	2	0	6	0.823159	3.26686	1.99123	3.71531
NFE2L3	2	2	8	0.904381	2.67947	3.72225	3.02901
KTN1-AS1	0	1	2	0.120788	3.72342	3.25696	2.60777
AC046134.2	0	1	2	0.231459	3.72826	3.16969	2.67927
KCND2	2	1	7	0.519526	-1.03023	2.04828	3.7283
HSPA1B	2	1	7	0.469201	2.53263	3.09303	3.73164
AC126323.6	0	0	1	0.150135	3.73449	2.25062	1.81392
SNTB2	1	2	4	0.605005	3.17644	3.74124	2.05289
ACPP	0	0	1	0.152217	3.74386	2.80547	2.53261
TMEM156	2	0	6	0.555229	2.12452	2.375	3.74422
FAM86B3P	0	2	3	0.391899	3.28444	3.74442	1.00858
AC114763.1	0	1	2	0.121466	3.74462	3.13584	2.18113
NRBP2	0	1	2	0.120511	3.74961	3.24282	2.45972
SCART1	0	2	3	0.278335	3.5617	3.75312	1.33302
ZSCAN21	0	0	1	0.115888	3.75628	2.83192	2.4876
GCH1	2	1	7	0.476717	2.42756	3.1485	3.75782
SLC37A3	0	0	1	0.128224	3.76061	2.73372	2.38745
C1QTNF6	0	1	2	0.146427	3.77112	3.35651	2.58415
DPH6-DT	0	1	2	0.140285	3.77689	2.9715	1.9981
REPS2	0	0	1	0.212294	3.77772	2.79187	2.58859
NOS1AP	0	1	2	0.140235	3.77919	3.06436	1.77483
ZNF674	0	1	2	0.119197	3.78137	3.32359	2.64077
FAM200A	0	0	1	0.340391	3.78483	2.58652	2.50518
AC027117.2	0	1	2	0.174088	3.79005	2.15065	-1.3079
AL356599.1	0	2	3	0.156705	3.79682	3.48569	2.42367
PNPLA1	0	0	1	0.206999	3.80008	3.14544	2.68333
USP41	0	2	3	0.579906	3.28844	3.80106	2.10621
FAP	0	1	2	0.176816	3.80181	0.725323	-5.83939
SAMSN1	2	0	6	0.964286	3.60862	2.22555	3.80496
TGFA	2	2	8	0.337376	2.30678	3.81438	3.63591
ZFPM2-AS1	0	1	2	0.172501	3.81961	1.96173	-1.93164
FAM83F	0	2	3	0.277522	3.71199	3.8222	2.41683
CPXM1	2	2	8	0.417092	1.95552	3.82991	3.37447
OCLN	1	2	4	1.06805	-1.26218	3.83169	-0.375128
HELLPAR	0	1	2	0.246335	3.83172	2.86592	2.05479
FABP3	2	1	7	0.532979	2.69631	3.01842	3.83253
TRANK1	2	2	8	0.743987	2.0042	3.8438	2.85825
PRTG	0	1	2	0.231865	3.84602	-1.31424	-5.83939
CAMKV	0	2	3	0.105724	3.8493	2.13096	-5.83939
CR1	0	1	2	0.128217	3.85197	2.13286	-0.093963
NLRP7	1	0	5	1.05922	3.85898	1.63458	3.83886
DPF3	2	0	6	0.487442	2.70662	2.77935	3.8594
ADAMTS7	0	2	3	0.353259	3.55251	3.86284	1.62625
NRIP3	2	2	8	0.670825	-2.65581	3.86479	0.755766
TET1	1	2	4	0.832265	2.07885	3.86621	1.75471
NCF1	2	0	6	0.424793	1.45226	0.336378	3.86815
LINC01685	0	1	2	0.119201	3.86928	-0.0981056	-5.83939
ALKBH4	2	2	8	0.455684	2.80594	3.60527	3.87508
NCALD	2	0	6	0.501694	2.72114	1.85388	3.87611
KIAA1217	0	1	2	0.250203	3.8874	1.72834	-0.064339
ZDHHC21	0	2	3	0.146652	3.8875	3.58579	-3.6013
IL1RN	0	0	1	0.171452	3.88963	2.53474	1.68449
GDAP1L1	0	0	1	0.56197	3.89443	2.62618	2.78331
EPOR	0	0	1	0.108931	3.89528	2.7247	2.22206
MDGA1	0	2	3	0.102127	3.90072	3.52861	1.74625
LINC02193	0	1	2	0.136274	3.90408	3.5165	2.8327
ELL2	0	0	1	0.177385	3.90546	3.07728	2.86836
LINC00877	2	0	6	0.460194	2.43966	2.46513	3.9192
FSCN1	2	2	8	0.622582	1.12738	3.92256	2.70071
AC021851.1	0	2	3	0.305617	3.81325	3.93007	2.77675
F3	1	2	4	0.79616	2.50083	3.93784	2.1307
LINC01547	2	1	7	0.506462	2.0714	3.23584	3.94334
ADAMTS14	0	2	3	0.182498	3.94465	3.93779	2.69261
PJA1	0	1	2	0.131858	3.94664	3.13639	1.74534
DNAJC15	0	2	3	0.101271	3.9476	3.0368	-1.36157
HBEGF	1	0	5	0.966247	3.95036	2.60001	3.75949
NMB	0	1	2	0.216792	3.95376	3.56245	2.58105
ELOVL7	1	0	5	0.726765	3.96223	2.80374	3.40398
EFR3B	0	0	1	0.332092	3.96337	2.92911	2.85054
OTOAP1	1	0	5	0.67813	3.97492	-1.19749	0.977566
CAMKK1	0	2	3	0.139251	3.98196	3.9246	2.78155
TLE2	0	0	1	0.368433	3.9855	1.96779	1.88468
LINC00159	1	2	4	0.630693	1.72335	3.99218	-0.481345
REEP6	0	1	2	0.156697	4.00303	3.54028	2.63518
AC106729.1	0	0	1	0.150022	4.00371	-3.60012	-5.83939
WASHC3	0	0	1	0.252877	4.00583	3.16898	2.49152
AC135782.1	0	1	2	0.177824	4.00802	3.61284	2.76604
TPST1	0	2	3	0.218532	3.95343	4.01031	1.96789
ERO1B	0	2	3	0.134004	4.01121	3.72617	2.63284
SOWAHD	0	2	3	0.217303	4.0131	3.48211	2.07258
BMX	2	0	6	0.458909	2.06283	0.899293	4.01569
ZNF786	2	0	6	0.567203	2.83446	3.03419	4.01746
C5orf66	0	0	1	0.137125	4.01907	3.19236	2.92936
ZSCAN31	2	2	8	0.859561	2.86668	4.01971	3.29518
TMEM187	0	0	1	0.129338	4.02325	3.10616	2.79927
ATP2B2	0	2	3	0.0866707	4.0284	3.60724	0.664921
NKAP	1	0	5	0.636719	4.03555	2.7232	3.03245
BICDL1	2	0	6	0.473821	2.37723	2.44566	4.04032
FCGR2B	0	0	1	0.110753	4.04586	-0.0374345	-1.88763
LINC02762	2	0	6	0.48845	2.60294	1.58852	4.04596
PILRA	0	0	1	0.145029	4.04958	2.83659	2.46877
MT2A	2	2	8	0.346775	2.92992	4.05187	3.8954
PRR5	2	0	6	0.481262	3.04116	3.09541	4.05815
SHISA2	0	2	3	0.0861611	4.0596	2.73124	-5.83939
PDYN-AS1	0	2	3	0.188636	4.06265	4.06391	0.498726
AC027250.2	0	1	2	0.191988	4.07347	2.62813	1.19295
TRMT12	0	0	1	0.590173	4.07933	2.68053	2.88467
SLC4A11	0	1	2	0.119082	4.08301	3.46116	2.55224
GTF2H5	0	1	2	0.164911	4.08475	3.63038	2.70861
CACNA1C	1	0	5	0.664785	4.08618	2.84079	3.32049
C2orf88	0	1	2	0.145651	4.09149	3.23147	2.21782
KCNH2	1	2	4	0.976042	-5.84891	4.09378	-5.31106
NCF1C	2	0	6	0.417382	1.21226	-0.0219996	4.09382
DBNDD1	2	1	7	0.522921	1.44058	3.17334	4.0942
LINC01388	0	1	2	0.192153	4.09576	3.51817	2.20583
CEBPE	0	1	2	0.171072	4.09964	3.40545	2.66528
ZNF302	1	0	5	0.799983	4.10303	2.98499	3.69143
RBM41	0	2	3	0.172647	4.10497	3.96474	-5.31106
DMC1	2	2	8	0.577045	2.80249	4.10886	3.58813
PCOLCE2	0	2	3	0.0956091	4.11829	3.92888	2.24448
LINC02367	0	0	1	0.142271	4.11876	3.35737	2.93105
CORO2B	0	2	3	0.127323	4.11885	3.11981	-0.863351
FAM114A1	0	2	3	0.552686	3.677	4.12036	2.55741
UBE2Q2P1	0	1	2	0.121969	4.13401	3.68421	2.9741
AC098829.1	0	0	1	0.110035	4.13895	2.06987	1.23475
NAV1	0	1	2	0.176484	4.14091	3.42326	2.67252
ITGA3	2	1	7	0.503927	3.00294	3.39224	4.15543
SLC24A3	0	2	3	0.0946807	4.16263	3.25335	-4.68624
KLHL35	1	2	4	0.709364	2.92356	4.16493	2.29806
SLC1A3	0	1	2	0.125281	4.16657	3.45232	2.28517
CADM1	0	0	1	0.290286	4.16869	-4.78156	-5.83939
SNX9	1	2	4	1.06114	2.281	4.17178	2.59413
TLR2	2	2	8	0.319025	-3.61083	4.14444	4.17463
TRIM58	0	2	3	0.101266	4.176	3.91336	2.64497
TMEM67	0	1	2	0.194304	4.17812	3.79742	2.92489
MT1G	0	2	3	0.127645	4.18001	3.98092	3.18867
TNR	2	1	7	0.569925	2.83838	3.14197	4.18237
CAMSAP2	0	2	3	0.189403	4.18519	3.9058	3.07936
CHI3L1	0	2	3	0.59515	2.7769	4.18625	-0.31766
CLDN18	0	2	3	0.131489	4.19376	3.87373	2.62856
AC006538.2	1	0	5	0.688853	4.20004	2.86711	3.46046
SLC12A5	2	0	6	0.461131	3.17047	3.19001	4.2023
DDIT4	0	2	3	0.163322	4.20565	4.16777	2.61936
CES3	0	1	2	0.162069	4.21075	3.54475	2.81076
SLC27A2	2	2	8	0.964801	2.49529	4.21383	2.98529
PROS1	0	1	2	0.136599	4.21736	3.14426	1.82272
NEK11	2	1	7	0.574613	2.64787	2.9922	4.21971
LYSMD4	0	2	3	0.21219	4.19143	4.22092	2.88936
CD276	0	2	3	0.120331	4.22118	3.53688	-5.83939
TMEM177	0	2	3	0.102662	4.2253	3.94802	2.62649
P3H3	1	2	4	0.771985	2.77338	4.22711	2.31519
SLC40A1	1	2	4	0.91779	-0.244446	4.22944	-0.386805
LTC4S	2	1	7	0.477769	2.51197	3.45063	4.23041
AP002761.4	0	2	3	0.191256	4.23197	4.2373	2.35655
MINAR1	0	0	1	0.116573	4.24212	3.47205	3.09951
CPNE5	0	2	3	0.150477	4.24519	3.5288	1.00858
TBC1D25	0	1	2	0.213621	4.24836	3.95901	3.24247
CMTM8	2	1	7	0.5385	2.99513	3.33983	4.25168
SDCBP	0	0	1	0.467235	4.25916	2.8023	2.87016
ZNF337	0	1	2	0.137823	4.26106	3.88721	3.22176
MGAM	2	0	6	0.57939	3.28882	2.25975	4.26779
WWP1	0	1	2	0.164819	4.27907	2.91486	0.148448
AEBP1	2	0	6	0.503602	0.408432	0.746203	4.28324
NMRK1	0	0	1	0.498581	4.28602	3.26829	3.34236
AC009646.2	1	0	5	0.662972	4.29021	2.36951	3.099
LINC02615	0	1	2	0.136763	4.29545	3.72037	2.7029
PPP1R26	2	2	8	0.487676	2.80784	3.87187	4.29597
AF064858.1	0	2	3	0.122937	4.29652	3.79797	1.75597
AL365361.1	2	2	8	0.785381	2.87027	4.29708	3.48546
FAM189B	0	2	3	0.172852	4.29786	4.18804	-3.1746
ZNF449	0	0	1	0.272738	4.30128	3.27322	3.1326
RNASET2	0	2	3	0.0992818	4.30467	4.19331	3.13286
ASRGL1	2	1	7	0.477824	2.80958	3.63249	4.31551
PLCL1	0	1	2	0.225798	4.31774	3.19977	2.20127
APBA1	0	0	1	0.255454	4.32061	2.28237	0.620075
THBD	0	0	1	0.210524	4.32346	3.62168	3.12082
RAB7B	0	2	3	0.288398	4.22755	4.32744	3.18402
LINC01138	0	1	2	0.174865	4.32768	3.80813	2.70848
ANKRD16	0	1	2	0.122551	4.33533	3.91519	3.24723
NLRP12	1	0	5	1.0519	4.33778	3.08374	4.31281
TNFRSF12A	2	0	6	0.424438	2.91789	2.82981	4.33793
PSD3	1	0	5	0.863206	4.34076	2.67565	3.87363
HHAT	0	2	3	0.198244	4.3266	4.34111	2.79221
CALN1	0	0	1	0.173094	4.34198	2.04464	0.594562
ZCCHC24	2	0	6	0.416803	3.14274	3.04091	4.34198
ECM1	0	2	3	0.22025	4.19728	4.34527	-0.69123
PIK3IP1	1	0	5	0.812032	4.34562	3.21529	3.94885
MCEMP1	1	0	5	0.702206	4.34726	3.3393	3.81589
AC016573.1	1	0	5	1.0347	4.34847	1.53592	4.22161
WFDC1	0	2	3	0.43261	3.9993	4.35341	2.56763
TRGC2	0	1	2	0.11987	4.35498	2.49832	-0.333839
YES1	0	2	3	0.0862694	4.35934	3.24443	-3.83193
ARHGAP24	0	1	2	0.139778	4.36377	3.81122	2.81693
RAPGEF4	0	1	2	0.152647	4.3659	3.10025	0.670585
ZNF815P	2	0	6	0.573755	3.26337	3.45885	4.37142
PORCN	0	0	1	0.135338	4.38388	3.29558	2.94545
AC104051.1	1	2	4	0.617994	0.363822	4.38881	-4.25442
TRAF5	0	2	3	0.365844	4.16681	4.39048	2.8834
HYAL3	0	2	3	0.0942572	4.39211	4.26486	3.16314
HCST	2	0	6	0.53746	3.15963	3.32414	4.39927
CUX2	0	1	2	0.144727	4.39995	3.79657	3.08242
ZBTB38	0	1	2	0.249736	4.40296	3.68747	3.09257
RBMX2	0	0	1	0.137503	4.40738	3.66556	3.25912
MCF2L	2	2	8	0.420389	2.23064	4.40739	3.8701
FARP1	0	2	3	0.260558	4.15622	4.41364	0.40862
HIST1H3I	0	2	3	0.0864888	4.41475	4.02044	1.56385
C1orf131	0	1	2	0.128297	4.41479	3.8923	3.2159
SLC24A1	0	2	3	0.109983	4.41796	4.22229	3.34546
RHOH	2	1	7	0.479222	2.75987	3.67814	4.42419
GRIP1	0	1	2	0.212112	4.43122	3.33966	0.652822
FCAR	1	0	5	0.640755	4.43329	2.15739	2.80419
APOO	0	0	1	0.196604	4.43895	3.71781	3.22527
PIR	0	2	3	0.109485	4.44383	4.19409	3.07063
MAST4	2	2	8	0.368266	2.45647	4.44776	4.09406
AC011997.1	0	0	1	0.216494	4.44834	3.54153	3.35923
CYP3A5	0	0	1	0.435584	4.45231	3.26899	3.29193
AP006222.1	0	1	2	0.15321	4.45388	3.75115	2.94922
RNF113A	0	0	1	0.445438	4.46475	3.15155	3.18824
LTV1	0	2	3	0.0880214	4.46925	4.2904	3.24351
SHROOM2	0	2	3	0.323335	3.99789	4.46964	0.381851
BACE2	2	2	8	0.498293	0.785239	3.39078	4.48282
KIF5C	0	2	3	0.0959008	4.48371	4.21705	1.83231
ZNF136	2	1	7	0.479134	2.7884	3.72392	4.48496
FCGR2A	0	2	3	0.216513	4.45206	4.48762	3.12204
SYNE1	1	0	5	0.758619	4.48911	2.75518	3.74402
DNM1	1	2	4	0.744134	2.65468	4.49417	1.93639
GSAP	0	2	3	0.111814	4.49421	4.4063	3.36741
AC093627.5	2	0	6	0.516135	3.42848	3.54013	4.49486
PGM2L1	2	1	7	0.499188	3.23341	3.67313	4.49636
DDX59	0	2	3	0.096275	4.49763	4.3071	3.33671
RELB	0	0	1	0.20996	4.4985	3.07112	2.77265
GVINP1	0	0	1	0.30614	4.49964	3.10647	2.96456
TTC9	2	0	6	0.419619	3.1533	3.05067	4.50289
MAP7	0	0	1	0.456288	4.50485	2.65273	2.72174
CCNQ	1	0	5	0.752974	4.50571	3.40868	4.02458
NKD1	0	0	1	0.198405	4.50578	3.23687	2.36518
RPP40	0	1	2	0.214741	4.5074	4.08107	3.02059
EPHA1	2	1	7	0.469377	2.75583	3.57426	4.52115
TSPYL4	2	2	8	0.404571	1.62391	3.96167	4.52252
DDX60	0	0	1	0.151877	4.52277	3.42864	2.79075
ITGAM	2	0	6	0.888717	4.27858	3.24444	4.53459
PALM	2	2	8	0.429605	3.4653	4.5366	4.2609
CCDC9B	0	0	1	0.569756	4.54912	3.42922	3.57483
ADAMTSL4	1	2	4	0.614797	3.65554	4.54981	2.57355
IL17RE	0	2	3	0.506466	4.21092	4.55422	3.18834
NCAM1	0	1	2	0.119087	4.55737	3.40296	1.71688
SLC45A3	0	2	3	0.114779	4.56192	4.31383	3.2408
FLT3	2	2	8	0.81087	0.512461	4.56608	2.17756
MTX1P1	0	2	3	0.125441	4.56771	4.24845	2.96096
DEPTOR	0	0	1	0.214206	4.57514	3.62965	2.94716
SUSD1	2	2	8	0.34563	2.81967	4.58003	4.33869
AC124944.2	0	0	1	0.109219	4.58379	3.78873	3.46002
ZFAND1	0	2	3	0.0930052	4.59218	2.94036	-5.83939
KIAA1211L	2	2	8	1.0449	-0.913243	4.5932	0.27755
NHS	0	0	1	0.170812	4.59616	2.74707	2.26309
MOSPD1	1	0	5	0.642669	4.60698	3.42858	3.77891
IL1B	2	1	7	0.477415	3.28296	4.00455	4.60741
CRYZ	2	1	7	0.47094	3.47867	4.05907	4.61684
AC103855.3	0	2	3	0.112219	4.63981	4.4184	1.78384
AC019117.3	2	1	7	0.46976	0.505576	2.56938	4.6498
CFAP97	2	2	8	0.822601	3.27953	4.65009	3.82963
ACVR1	0	2	3	0.211613	4.65101	4.15398	2.80619
RN7SKP203	0	1	2	0.143165	4.65778	4.19543	3.3483
EBF4	2	2	8	0.535117	0.614858	4.65808	3.19551
ADAMTS9	0	2	3	0.0925662	4.667	3.0124	-5.83939
ANK2	0	1	2	0.132863	4.67333	4.0244	2.90307
MAP10	0	2	3	0.15879	4.67678	4.40455	3.48444
CTPS2	2	2	8	0.337878	-1.12344	4.67973	3.98557
LINC00265	2	1	7	0.570582	3.69329	3.9181	4.69278
ZNF714	0	0	1	0.231634	4.69319	2.34598	1.91671
MYO7B	1	2	4	0.610562	0.822286	4.70335	-4.29143
HNMT	0	2	3	0.103366	4.70637	3.81966	-0.379271
MTX3	0	1	2	0.123964	4.70917	4.14836	3.24321
EMP1	2	0	6	0.617929	1.3764	-2.70528	4.71368
STOX2	0	1	2	0.119964	4.7171	3.87248	2.58133
CXorf21	0	2	3	0.110209	4.7172	4.28805	2.36833
SLC38A6	0	2	3	0.0861306	4.72709	4.57503	3.58193
RHOBTB1	2	2	8	0.328737	2.93332	4.63249	4.73214
SIAE	0	0	1	0.193741	4.73558	4.08024	3.63676
SOX13	0	1	2	0.208084	4.74304	4.44414	3.72016
GPC5	2	2	8	0.536448	-0.872722	4.74444	2.70579
DTX4	2	1	7	0.482839	3.11448	3.75387	4.74854
ST6GALNAC4	0	2	3	0.16996	4.74882	4.42918	3.40243
CIR1	0	2	3	0.182962	4.76056	4.75393	3.44445
HSBP1L1	2	2	8	0.36884	1.82107	4.34195	4.76214
KIZ	0	1	2	0.123564	4.76809	4.02965	2.84259
BLVRA	0	2	3	0.0962825	4.77258	4.5858	3.6346
ZNF337-AS1	0	1	2	0.211712	4.77666	4.39155	3.44513
NEIL1	0	1	2	0.131767	4.77875	4.28927	3.44942
RRAGB	0	1	2	0.137271	4.78029	4.26847	3.64039
LRRC3	0	2	3	0.122291	4.7839	4.47474	3.20326
COL4A2	0	2	3	0.087072	4.78414	4.58543	3.1671
MAMLD1	1	0	5	0.672732	4.80072	2.30556	3.32106
RNLS	0	0	1	0.168802	4.8031	3.93794	3.70892
SELENOW	2	1	7	0.577362	3.57894	3.84228	4.80325
JUP	2	2	8	0.577853	2.26699	4.80817	3.79347
ZEB1	2	2	8	0.423479	-2.623	3.19962	4.80907
OPLAH	0	0	1	0.249208	4.81107	3.68499	2.78298
ITGAX	2	0	6	0.917761	4.50701	3.0098	4.81456
PSMA1	1	2	4	0.754769	2.92916	4.81649	2.24893
RAC3	2	2	8	0.364241	3.68448	4.66478	4.81817
SLC25A53	1	0	5	0.636484	4.8207	3.78891	4.02273
GLCE	0	0	1	0.445225	4.82657	3.8163	3.84434
DPM3	0	1	2	0.123287	4.82847	4.37834	3.65683
SMC1B	2	2	8	0.620303	1.89948	4.83045	3.55481
CLDN5	1	2	4	0.955484	-0.304044	4.83228	-0.176317
KCNA3	2	2	8	0.826372	3.13847	4.83673	3.81496
AC116351.1	2	2	8	1.00658	3.58402	4.83957	3.89743
MITF	0	0	1	0.130408	4.8405	3.76126	3.40272
AGAP2	2	1	7	0.540582	3.56032	3.90784	4.84302
ABCA17P	1	2	4	0.663388	3.28089	4.8454	2.16274
CELSR3	2	2	8	0.652532	3.84495	4.85217	4.38697
MTCP1	0	0	1	0.617822	4.85687	3.72383	3.91327
SLC10A3	0	0	1	0.322418	4.86056	3.9064	3.82482
PRSS12	0	2	3	0.161004	4.86328	4.41597	2.91966
GALNT3	0	2	3	0.100168	4.86358	4.5573	1.5941
UPRT	0	0	1	0.437334	4.86463	3.57778	3.60469
SCML1	0	0	1	0.145359	4.8649	3.93054	3.4003
TMEM117	0	0	1	0.233707	4.87258	3.98037	3.29736
GCA	0	2	3	0.087595	4.881	4.37796	1.39476
CCL2	2	0	6	0.861496	4.02409	1.03848	4.88729
OLFML2A	1	2	4	0.882964	1.75098	4.88734	1.47316
C15orf41	0	2	3	0.0917569	4.89115	4.70498	3.17715
ZXDB	0	1	2	0.191207	4.8924	4.28393	2.9067
RAB3D	0	0	1	0.10889	4.90004	4.01629	3.64199
GPAT3	2	1	7	0.469828	3.39674	4.08549	4.90433
AL162595.1	1	2	4	0.60541	4.14788	4.90741	2.59464
GLRX2	0	0	1	0.136217	4.90866	4.2463	3.88561
KANK4	1	2	4	0.693847	0.994923	4.91018	-1.21603
TSGA10	0	2	3	0.151844	4.9117	4.86102	3.46877
LINC01550	0	2	3	0.206268	4.92338	2.06654	-5.83939
FAM49A	0	2	3	0.158211	4.92812	4.54059	3.22721
RAB9A	0	1	2	0.133152	4.9311	4.46962	3.67073
SCRN3	0	2	3	0.0861361	4.93264	4.65021	2.81311
SEPTIN10	0	2	3	0.14688	4.93974	4.75659	0.367585
LRRC7	0	0	1	0.187735	4.94112	3.14226	2.71427
HERC5	0	2	3	0.210142	4.91168	4.94378	3.36177
ABCA13	0	1	2	0.140277	4.94512	3.88262	1.96548
NBPF9	0	1	2	0.119108	4.94955	4.39798	3.58056
CD300A	2	0	6	0.413917	3.3916	2.74998	4.95103
C5	0	2	3	0.385192	4.68815	4.95795	3.30365
PPP2R2B	0	0	1	0.468819	4.96064	-4.29024	-3.84696
UTP23	0	1	2	0.121089	4.96163	4.52171	3.83553
PIM2	0	1	2	0.119086	4.96389	4.46752	3.74246
NDUFA1	0	0	1	0.127508	4.96432	4.16245	3.74498
VENTX	2	0	6	0.497936	3.94207	4.02283	4.9652
PYROXD2	0	1	2	0.20667	4.97166	4.12081	3.31473
FAM214A	0	1	2	0.160757	4.97255	4.57545	3.78443
PCSK5	1	0	5	0.85321	4.97371	3.74887	4.61347
SMOX	0	0	1	0.225476	4.97985	3.75372	3.52054
TMC3-AS1	0	1	2	0.132686	4.98274	4.0028	2.76936
PAPLN	0	2	3	0.478971	4.5992	4.98574	3.31824
AC073529.1	0	1	2	0.144888	4.99055	4.63597	3.98053
CORO1B	1	2	4	0.974823	3.74463	4.99551	3.81016
MEX3A	2	2	8	0.840481	3.68524	4.99933	4.1938
CD70	0	0	1	0.124052	5.01684	2.59323	1.75109
FBXO4	0	2	3	0.142121	5.01718	4.77039	3.86454
TTC7B	0	0	1	0.14675	5.02323	4.26292	3.82891
KIF16B	0	2	3	0.0925363	5.02621	3.86417	-5.83939
RETN	2	1	7	0.471259	3.89665	4.47885	5.0327
CPM	0	1	2	0.220215	5.03381	3.97261	1.27451
FSTL3	0	2	3	0.180147	5.0373	4.78808	4.02203
AC008957.1	0	0	1	0.563538	5.04067	2.50816	2.82506
ATP8B2	0	2	3	0.1984	5.0473	4.56564	3.19133
ARSD	0	2	3	0.201718	5.04903	4.58566	3.2806
CRYL1	0	1	2	0.189796	5.05012	4.54089	4.0316
THEM4	0	1	2	0.131847	5.05059	4.3728	3.51537
DAB1	0	2	3	0.180837	5.05371	4.65888	3.44877
AC093459.1	2	0	6	0.394536	2.18315	1.53014	5.06849
MOB3B	1	0	5	0.972513	5.07324	3.82635	4.90772
LTBP1	0	0	1	0.379636	5.07453	3.89232	3.85594
TMEM120A	0	0	1	0.118682	5.07867	4.20328	3.88563
C9orf64	0	1	2	0.121008	5.08125	4.54618	3.80399
ZNF496	0	2	3	0.547369	4.52382	5.08387	3.08353
TRGC1	0	1	2	0.120058	5.08438	3.18677	0.51102
PMAIP1	2	1	7	0.490138	4.03352	4.64998	5.08749
ZNF212	2	1	7	0.469118	3.87817	4.44627	5.08757
C1GALT1C1	0	0	1	0.202857	5.0898	4.16077	3.95818
AC097534.1	2	1	7	0.562754	3.99832	4.25714	5.0927
ATP1B1	2	2	8	0.438183	3.37903	4.7003	5.10249
TNFAIP3	0	0	1	0.109402	5.11528	3.95662	3.44722
GJB2	0	1	2	0.13217	5.12427	4.08131	2.76451
DNM3	0	0	1	0.16954	5.12747	3.8935	3.5682
PPM1M	0	2	3	0.142809	5.13355	4.80224	3.59051
RAB33A	0	0	1	0.600035	5.13389	4.02925	4.19888
CDH24	2	1	7	0.520652	3.89967	4.7024	5.13661
TOX	2	0	6	0.410702	3.13149	2.91796	5.13722
TYROBP	2	1	7	0.515364	3.29532	3.87707	5.14287
UBE2Q2P2	0	1	2	0.187666	5.15163	4.65241	3.53859
SUGCT	0	2	3	0.598793	4.49711	5.15392	3.07151
TBXA2R	0	2	3	0.124802	5.16248	4.56119	-4.37528
VAMP4	0	0	1	0.122649	5.16258	4.47777	4.13148
AC106741.1	0	0	1	0.20201	5.16491	-2.5916	-4.29143
MT-ND3	0	2	3	0.100117	5.16857	4.98906	4.11227
GNG2	2	0	6	0.429167	3.57443	3.49567	5.16896
KLHL17	2	2	8	0.427139	3.84413	4.88141	5.17537
NTRK3	0	1	2	0.162696	5.17544	4.14695	2.0806
EPHX1	0	2	3	0.281	5.01552	5.18037	3.15257
MAPKBP1	0	2	3	0.145066	5.18078	5.1094	3.47657
CSPG4	1	2	4	0.605418	3.9453	5.1827	1.41361
MOB4	0	1	2	0.236702	5.18395	4.60367	4.10214
SNX33	0	2	3	0.549009	4.77273	5.18699	3.71335
PTPRF	2	2	8	0.320559	3.80317	5.16848	5.19243
SEZ6L2	0	2	3	0.35043	4.93863	5.2004	3.28366
NRSN2-AS1	0	1	2	0.19029	5.20846	4.4276	3.64792
IFT57	0	0	1	0.166335	5.21398	4.17643	3.53718
P2RY2	0	2	3	0.306623	5.03713	5.22746	3.36333
MTFMT	0	1	2	0.173942	5.22975	4.66319	4.06521
IL31RA	0	1	2	0.119967	5.23066	3.37454	0.752243
MYBL1	2	1	7	0.536693	4.20227	4.48767	5.2315
LINC00894	0	1	2	0.156658	5.23399	4.2079	3.0531
COL28A1	0	1	2	0.13828	5.23714	3.55743	1.50685
SLC22A5	0	0	1	0.126057	5.23784	3.96367	3.5274
TMEM266	0	1	2	0.146513	5.24328	4.56357	3.76552
SLC25A25	2	1	7	0.586482	4.12946	4.35499	5.24539
MPC2	0	1	2	0.123102	5.25692	4.79683	4.06084
LPAR2	0	0	1	0.10999	5.27448	4.51522	4.1762
TMEM158	0	0	1	0.175845	5.27489	4.29695	4.04812
FAM135B	0	1	2	0.138576	5.27613	1.90009	-2.21516
LINC01184	0	0	1	0.146291	5.28569	4.57358	4.16786
GLRA2	0	0	1	0.303779	5.28629	3.52796	3.34462
LAMP5-AS1	0	2	3	0.140853	5.28837	5.00571	-0.837262
TFEC	0	2	3	0.201334	5.26523	5.29047	3.22637
F8	0	0	1	0.248127	5.29176	4.09821	3.9026
RPS27L	0	0	1	0.239863	5.29323	4.60857	4.07485
IRAK2	0	1	2	0.123973	5.29474	4.56379	3.584
CFD	0	2	3	0.176297	5.29594	4.90966	3.7027
SEMA3G	0	2	3	0.489567	4.83676	5.29594	3.37757
LINC01237	0	2	3	0.506992	4.05686	5.29815	0.366632
PADI2	0	0	1	0.217564	5.30032	3.52438	2.22918
KIF26B	0	0	1	0.376752	5.30449	3.54954	3.49085
SBDSP1	1	0	5	0.642783	5.30579	4.09109	4.45308
HAL	1	2	4	0.604303	4.48259	5.31826	3.03235
SNUPN	0	2	3	0.08613	5.35434	5.19354	4.14241
ZNF117	2	2	8	0.333983	1.80638	5.10683	5.36183
OLMALINC	0	1	2	0.122583	5.36239	4.91337	4.30289
SH2D3C	2	2	8	0.474207	2.76519	4.65785	5.36336
MICAL2	1	0	5	1.04993	5.36708	4.18852	5.34018
TERT	2	2	8	0.327677	3.36121	5.26674	5.37049
CNIH3	0	2	3	0.105795	5.37061	5.15491	4.15503
ADRB2	0	1	2	0.161018	5.38036	5.02625	4.32005
TIMM8A	0	0	1	0.389823	5.38547	4.38842	4.36706
PPP1R27	1	2	4	0.809367	1.3966	5.38564	0.485146
SNX20	0	1	2	0.119705	5.39155	4.58267	3.35382
CYSLTR1	0	0	1	0.536107	5.40567	3.90814	4.06286
PDE3B	0	2	3	0.222686	5.38028	5.4137	4.35457
BCL2A1	0	0	1	0.35384	5.41587	3.55901	3.45695
CCNE2	2	1	7	0.478589	3.91329	4.73916	5.41654
OFD1	0	2	3	0.293217	5.3133	5.42059	4.24521
PTPRU	1	0	5	0.636964	5.42205	4.35512	4.61298
GPR160	2	0	6	0.433157	4.29101	3.72801	5.42382
PCNX2	0	1	2	0.192929	5.43011	4.88003	4.3355
TMTC2	2	0	6	0.394469	3.96931	3.60737	5.43044
NUP37	0	1	2	0.154138	5.45505	4.88986	4.24734
ARFGEF3	1	0	5	0.693701	5.45753	3.46695	4.3737
SPAG6	2	2	8	0.488256	2.86773	4.71964	5.45984
KCNN2	0	1	2	0.191478	5.4684	4.69775	2.95153
PPIE	0	2	3	0.118769	5.47479	5.38607	4.20352
AC008014.1	0	1	2	0.122814	5.47487	4.84223	3.8334
LINC-ROR	2	0	6	0.394409	4.42408	4.17011	5.47904
TMEM263	0	2	3	0.0978099	5.48011	5.35419	4.18684
SLX4	2	1	7	0.474727	4.31208	4.93603	5.48267
MIR9-3HG	2	1	7	0.51812	4.04169	4.49082	5.49185
SLC50A1	0	1	2	0.122117	5.49908	4.97378	4.14294
MELTF	0	1	2	0.217855	5.49985	4.87113	4.29581
FAM3A	0	0	1	0.280582	5.50295	4.47381	4.34167
GAS6	0	2	3	0.257489	5.35612	5.50299	3.12195
GNA15	0	1	2	0.174483	5.50506	5.15356	4.41078
ARID5B	2	1	7	0.504821	3.38596	4.09779	5.50514
ODF2L	2	1	7	0.482115	4.49027	5.0607	5.5058
SPNS2	2	0	6	0.422709	4.4831	4.41456	5.50752
CEP89	2	1	7	0.49143	4.47846	4.85824	5.51381
MAML2	1	0	5	0.918488	5.51502	3.50304	5.10032
CD36	1	0	5	0.662785	5.51514	0.280418	2.26562
CA5B	0	0	1	0.11131	5.51985	4.73491	4.42561
ACOT9	0	1	2	0.24619	5.52134	4.91372	4.40318
TNFRSF14	1	0	5	0.664528	5.52897	4.3031	4.77436
PEX1	0	0	1	0.496343	5.53257	4.38759	4.46881
FBN1	0	1	2	0.123498	5.53323	4.71342	3.60945
DLK1	2	1	7	0.573143	3.82675	4.20492	5.53643
SLC22A20P	2	2	8	0.332059	4.00309	5.53782	5.37803
ZNF185	0	2	3	0.0902512	5.54065	4.76973	0.481935
DOCK3	0	0	1	0.613128	5.5411	3.81944	4.10111
ZNF518B	0	2	3	0.123046	5.55603	5.26501	4.07383
AL136018.1	1	2	4	0.626921	2.90038	5.55654	0.202391
STXBP5L	0	0	1	0.231472	5.5601	4.529	3.74488
ZNF75D	1	0	5	0.64193	5.5604	4.39087	4.73298
PFKFB4	1	2	4	1.02114	4.50248	5.56237	4.62421
RBM47	0	0	1	0.611137	5.56439	4.55662	4.71996
RNASE3	0	2	3	0.44913	5.2585	5.575	4.0702
PASK	2	1	7	0.471581	4.46239	5.03634	5.57718
GBA	0	2	3	0.224581	5.54255	5.57767	4.52088
RALGPS2	2	2	8	0.370687	3.84073	5.32775	5.5816
MICAL1	0	2	3	0.168589	5.58184	5.17725	3.86967
MOSPD2	0	0	1	0.224192	5.58192	4.99806	4.56361
TEDC1	2	2	8	0.524192	4.52345	5.24348	5.58201
AC078883.1	0	2	3	0.163632	5.58316	5.49368	1.78897
BARX1	0	1	2	0.124166	5.58824	5.01906	4.25747
MCTS1	0	0	1	0.319198	5.59202	4.43249	4.32963
FAM210B	0	2	3	0.0957185	5.61164	5.38165	4.2024
ZDHHC9	0	0	1	0.111385	5.61483	4.54286	4.12097
GK	0	0	1	0.16735	5.61688	4.78589	4.27202
AC025171.1	2	1	7	0.507703	4.50249	4.87044	5.61773
LAGE3	0	0	1	0.195208	5.61916	4.76909	4.5753
AC246817.2	0	1	2	0.119254	5.63441	5.05284	4.21352
NXT1	0	0	1	0.109307	5.63569	4.83502	4.50513
BIN1	0	2	3	0.122237	5.63791	5.23119	3.55785
IL18R1	1	0	5	0.665401	5.64524	4.47717	4.92918
VIT	0	2	3	0.0864892	5.65587	4.06592	-5.83939
PHF11	0	0	1	0.274084	5.66264	4.65508	4.51873
NXT2	0	0	1	0.206938	5.66568	4.60533	3.85698
FYN	0	0	1	0.156262	5.67005	4.65854	4.05851
HELZ2	1	0	5	0.997363	5.67145	4.37314	5.54386
TFR2	1	0	5	0.642425	5.6722	4.53296	4.86989
AC104088.1	0	2	3	0.101263	5.67476	4.65676	-0.259656
ARAP2	2	0	6	0.695413	4.72729	3.16155	5.67618
FCER2	0	1	2	0.183249	5.68958	3.72436	-0.581973
IRS1	2	1	7	0.477755	3.78243	4.82977	5.70002
CASZ1	2	1	7	0.590471	4.28554	4.56509	5.70821
LRRC45	2	1	7	0.469728	4.57776	5.14772	5.72323
PIGX	0	0	1	0.334475	5.72497	4.51748	4.42857
JAG1	0	2	3	0.194354	5.72603	4.42897	0.668127
STRIP2	0	2	3	0.15244	5.72706	5.40074	4.26378
GANC	0	1	2	0.173672	5.72788	5.32882	4.48841
PDE4B	0	0	1	0.265654	5.728	4.47988	4.29959
C12orf75	1	0	5	0.636486	5.73114	4.66439	4.88656
GBA2	2	1	7	0.497803	4.66172	5.0409	5.74099
NAA40	2	2	8	0.449737	4.54865	5.44772	5.74107
TMUB1	2	1	7	0.471149	4.39195	4.99141	5.74186
PLAGL1	2	2	8	0.566686	4.10783	5.74651	5.10801
DCAKD	2	2	8	0.379787	4.50512	5.549	5.74739
ATP13A2	2	0	6	0.55512	4.03281	4.29784	5.74811
KLF10	2	0	6	0.474191	4.7331	4.77601	5.76043
TSC22D3	1	0	5	0.748337	5.77036	4.71404	5.29928
TNNT1	2	2	8	0.375538	2.85896	5.32575	5.77253
BTBD11	2	0	6	0.425788	4.60076	4.53178	5.78357
MXD3	2	1	7	0.519153	4.75794	5.07593	5.79104
POP1	2	1	7	0.471335	4.52787	5.17913	5.79727
MERTK	0	2	3	0.103881	5.79861	5.55531	4.40852
VLDLR-AS1	0	0	1	0.144332	5.79874	5.15537	4.79188
FMNL2	0	2	3	0.102882	5.79944	5.44827	1.88518
PON2	0	0	1	0.109309	5.80488	4.66248	4.19184
AC068587.4	0	2	3	0.211872	5.77658	5.8058	4.46904
ARHGEF9	0	0	1	0.611726	5.81533	4.5229	4.73296
AJM1	2	2	8	0.489917	3.99578	5.29279	5.81535
TMEM255B	0	1	2	0.177739	5.81995	5.1874	3.83244
AK4	2	1	7	0.523916	4.55935	5.38553	5.82124
UBQLN2	0	1	2	0.21659	5.82459	5.29863	4.81548
DONSON	2	1	7	0.482938	4.82584	5.21802	5.82893
AC008875.3	2	1	7	0.483004	2.37519	4.32569	5.83015
IFIH1	0	0	1	0.162998	5.83036	4.64794	3.92834
PTAFR	0	2	3	0.153032	5.83139	5.78771	4.54484
UBASH3B	2	0	6	0.401235	4.25599	4.01728	5.83205
ARHGAP9	2	0	6	0.421907	4.71643	4.63886	5.83679
PLPPR2	0	0	1	0.110179	5.83684	4.4634	3.84767
MARCKSL1	2	2	8	0.321415	0.413538	5.84531	5.50615
MTERF1	0	0	1	0.226076	5.8455	3.8738	3.50025
IGF2BP2	2	1	7	0.516199	4.67398	5.42482	5.84556
UPB1	2	1	7	0.480606	3.43404	4.78425	5.8596
TRMT2B	0	0	1	0.490193	5.86582	4.8409	4.90838
GATM	0	0	1	0.171616	5.86738	2.7498	1.93748
IL1RAP	1	0	5	0.636858	5.88041	4.64374	4.88543
DBN1	2	0	6	0.411896	4.36613	3.75816	5.88185
HDDC2	0	1	2	0.1465	5.89854	5.38466	4.78126
USP44	2	1	7	0.471243	3.3276	4.46886	5.90184
CPS1	0	2	3	0.203732	5.89069	5.90734	4.75354
AOAH	0	2	3	0.124512	5.90964	5.81108	4.35408
NRM	2	1	7	0.528941	4.86492	5.55942	5.9119
PTPN18	0	2	3	0.0888864	5.91332	5.71706	4.22077
CYTH4	2	0	6	0.447042	3.63002	3.61071	5.92394
LMO7	1	2	4	1.01118	4.86595	5.92512	4.97376
GOLGA2P11	0	0	1	0.12271	5.92821	4.7937	4.21978
FAM81A	0	1	2	0.152768	5.9286	5.32171	4.62791
ATP8B3	0	2	3	0.120087	5.92928	5.83385	4.53195
ITGA7	0	2	3	0.123513	5.93048	5.83831	4.50071
DYNC2H1	0	0	1	0.229128	5.93417	5.30466	4.82927
SEMA4A	0	2	3	0.162787	5.9343	5.58718	4.43552
DNAH14	0	1	2	0.154163	5.93893	5.47671	4.58309
STAG3L4	0	0	1	0.109282	5.94349	5.19455	4.86665
HIST1H2BI	0	2	3	0.113451	5.94378	4.30725	-2.83845
RENBP	0	0	1	0.280685	5.94516	4.64084	4.47352
EBF1	0	1	2	0.147564	5.94705	5.20651	3.81918
C11orf95	2	2	8	0.474985	4.92467	5.66948	5.94823
ASPH	0	2	3	0.0885651	5.94837	4.28493	-5.31106
AMER1	0	0	1	0.478429	5.95276	4.67233	4.74406
SOBP	2	0	6	0.56714	4.77813	4.97719	5.95765
NEGR1	1	0	5	0.993335	5.95821	2.94507	5.64514
LINC01226	0	2	3	0.297487	5.64457	5.96162	2.61523
LYPLAL1	0	1	2	0.120679	5.96219	5.4222	4.66937
SLC25A43	0	0	1	0.242286	5.974	4.83763	4.64384
CSTF2	0	0	1	0.112311	5.97615	5.21267	4.91625
RAB32	0	1	2	0.136565	5.98	5.41307	4.71476
GREB1	2	1	7	0.537238	4.91434	5.21033	5.98524
FCN1	0	0	1	0.118188	5.98723	4.75831	4.156
CD82	2	1	7	0.520734	4.29769	4.81304	5.98789
PIDD1	2	2	8	0.475227	4.84977	5.68242	5.99442
RNASE2	0	2	3	0.25889	5.9156	5.99462	4.73779
RYR2	0	0	1	0.305117	6.00203	-2.70528	-3.6013
NWD1	0	0	1	0.15316	6.00689	4.24215	3.73177
LYSMD2	0	1	2	0.20333	6.00748	5.36274	4.74546
ERN1	0	2	3	0.0870309	6.00972	5.82844	4.53708
TSPAN4	2	2	8	0.331712	3.5653	5.85439	6.01366
UST	0	1	2	0.168715	6.02168	5.57035	4.63963
MAGED1	2	2	8	0.319885	-4.30096	5.90455	6.02918
GPRIN3	0	2	3	0.252859	5.79043	6.0314	1.85925
SDCCAG8	0	2	3	0.145316	6.03247	5.79705	4.94709
AC126323.1	0	0	1	0.108888	6.0496	4.95762	4.49212
MBTPS2	0	0	1	0.146862	6.05225	5.16249	4.65434
LINC01473	0	2	3	0.14959	6.05463	5.66337	4.28088
PKP4	0	2	3	0.169086	6.05802	5.97068	1.28929
PLPPR3	0	0	1	0.157518	6.06921	2.9708	2.09674
AC090825.1	0	2	3	0.194541	6.07162	5.57077	4.11964
ABCD1	0	0	1	0.435881	6.0761	4.76345	4.78924
NANP	0	1	2	0.161736	6.08245	5.36029	4.56339
ALG13	0	0	1	0.283909	6.08382	4.99341	4.85725
ARRDC2	1	0	5	0.754599	6.0847	4.97673	5.60161
AC093627.4	2	0	6	0.540041	4.38923	4.6201	6.08726
PALD1	2	1	7	0.469332	4.94592	5.47664	6.0885
CTH	0	1	2	0.119144	6.08994	5.46413	4.55523
SMIM3	2	0	6	0.394504	4.65361	4.32604	6.09042
DIS3L	0	1	2	0.122044	6.09326	5.67012	5.00148
RAB4A	0	2	3	0.206663	6.07647	6.09901	4.78234
DPY19L1P1	2	1	7	0.575812	4.9619	5.20942	6.10081
PSMD10	0	0	1	0.349651	6.10341	4.95085	4.8829
SNX10	2	1	7	0.475768	4.54632	5.19698	6.10405
VILL	0	2	3	0.428881	5.8251	6.11977	4.61295
ABCA2	2	1	7	0.505549	4.80929	5.62253	6.12056
MTM1	0	0	1	0.113308	6.12142	4.98783	4.55338
CASTOR2	2	0	6	0.742662	5.60666	4.57837	6.1225
PLAC8	0	2	3	0.293846	5.68114	6.12262	1.31301
TRIM41	2	1	7	0.470039	5.01214	5.52556	6.14215
MAGED2	0	2	3	0.192844	6.13839	6.14411	4.82256
SAMD9	0	0	1	0.530702	6.14588	5.12877	5.22944
FAM43A	1	0	5	0.682906	6.15385	4.81958	5.39572
MBNL2	0	2	3	0.116736	6.15501	5.71317	0.0303675
AL138720.1	0	2	3	0.463725	5.83015	6.1555	4.68249
MPC1	0	0	1	0.110252	6.15888	5.41335	5.07863
NBPF17P	0	1	2	0.184008	6.16105	5.57905	4.29976
TRIM71	2	1	7	0.529113	5.01407	5.34866	6.16752
SMAD7	2	1	7	0.576686	4.96964	5.22984	6.17387
SBDS	1	0	5	0.644356	6.17952	5.01846	5.37515
AFDN	0	0	1	0.534949	6.19677	-5.8382	-4.60591
TNKS1BP1	2	2	8	0.533035	4.85412	6.20067	5.7161
SDHAF3	0	0	1	0.406942	6.20202	4.71999	4.7112
CPQ	0	1	2	0.195879	6.20441	5.65279	4.38047
CD55	0	1	2	0.129701	6.20511	5.71132	4.87592
DPYD	0	0	1	0.109016	6.20662	5.26144	4.86661
LINC01169	0	2	3	0.103845	6.21453	5.57787	2.576
MPP6	2	0	6	0.551399	4.83817	5.04466	6.21469
ASB2	0	0	1	0.1233	6.21522	5.14906	4.60767
MIR3681HG	2	0	6	0.396449	3.3281	2.48799	6.22066
C18orf54	2	2	8	0.398281	5.06921	6.00978	6.22379
NTPCR	0	2	3	0.0871007	6.22388	6.09269	5.155
SNRPB2	0	0	1	0.225757	6.22657	5.26506	4.54623
RFX3	0	0	1	0.166013	6.23549	5.60317	5.21405
ARHGEF10L	0	2	3	0.380153	5.66792	6.23935	2.65193
TMOD2	1	0	5	0.653289	6.24062	4.91854	5.37775
BLACE	1	0	5	0.735144	6.24285	5.06024	5.68988
SULT1A1	0	2	3	0.424762	5.90095	6.24512	4.45752
CHM	0	0	1	0.141986	6.24748	5.26617	4.96315
NRXN3	0	2	3	0.242418	5.75452	6.25347	-3.96782
POU2F2	1	2	4	0.97739	2.39702	6.2554	2.61299
KAZN	0	2	3	0.177308	6.2564	6.24407	5.07423
TMEM132B	0	1	2	0.146413	6.25835	5.64432	4.50053
BARX1-DT	0	1	2	0.120386	6.2605	5.6925	4.81678
NAV3	1	2	4	0.724982	-0.261878	6.26733	-3.19778
FAM120C	0	1	2	0.168163	6.27185	5.78681	5.2642
MDFIC	2	2	8	0.454768	5.00015	5.95574	6.27664
AL133538.1	0	0	1	0.108904	6.29121	4.54473	3.79754
USP25	1	0	5	0.901099	6.29769	5.26069	6.05971
SLC12A6	2	0	6	0.523127	4.97478	5.12612	6.30103
SH2B3	2	1	7	0.526833	5.23403	5.55556	6.32752
MOSPD3	1	0	5	0.824311	6.32853	5.29861	5.98471
STS	0	2	3	0.0861576	6.32866	6.0101	3.89328
PARPBP	0	1	2	0.239727	6.32881	5.65672	5.08105
WDSUB1	0	2	3	0.153334	6.35733	6.10057	5.20985
ZFP92	0	0	1	0.122137	6.35739	5.18778	4.59829
TPSAB1	1	2	4	0.783667	4.77372	6.36197	4.31856
GAPT	2	1	7	0.488277	4.76223	5.36305	6.36357
IFNGR1	0	0	1	0.220137	6.36576	5.72595	5.25566
ENOX2	0	0	1	0.17493	6.3738	5.26039	4.97562
EMID1	2	2	8	0.46619	3.57488	5.63989	6.37811
LMO1	0	0	1	0.109001	6.38529	5.0372	4.45492
FBXL18	2	1	7	0.475869	5.27268	5.73844	6.38897
SEM1	0	0	1	0.119425	6.39016	5.5998	5.20883
AGPAT4	0	1	2	0.212914	6.39774	5.04857	1.71701
FHIT	2	2	8	0.994867	4.83356	6.40687	5.24208
ATP9A	0	2	3	0.0916345	6.41529	5.05529	-2.3273
HSH2D	2	0	6	0.51315	5.13769	5.26623	6.41537
MAN1C1	2	1	7	0.52076	4.32361	4.96509	6.42782
PML	0	1	2	0.221605	6.43263	6.1055	5.26916
SIPA1L2	0	0	1	0.415417	6.43503	5.20503	5.20704
QPRT	2	2	8	0.519102	4.86331	6.44169	5.89373
MT-ND4L	0	2	3	0.144789	6.44796	6.40077	5.32868
IP6K2	2	2	8	0.317936	5.30042	6.44958	6.42814
RNF166	2	0	6	0.48133	5.15804	5.22711	6.45029
GPD2	1	2	4	0.961819	3.67263	6.45228	3.76711
LIMK2	2	1	7	0.47704	5.43795	5.86022	6.46234
FAM20C	2	0	6	0.50585	5.31329	5.41855	6.47796
MT-ND6	0	2	3	0.324074	6.31485	6.47885	5.06488
DTWD1	0	1	2	0.167707	6.4806	6.0069	5.03427
FERMT1	0	1	2	0.122457	6.48448	5.9617	5.13146
DNASE2	0	0	1	0.483032	6.49773	5.41138	5.47642
ZNF280C	0	1	2	0.218732	6.50468	5.37005	4.33459
DNA2	2	2	8	0.377342	5.00047	6.27993	6.51655
CCDC88B	2	1	7	0.472616	4.77696	5.53268	6.51827
MYO5A	0	0	1	0.512142	6.53707	5.28633	5.39129
RUNX2	1	0	5	0.637942	6.53773	5.35034	5.65601
CLU	1	2	4	0.605448	5.82171	6.54469	4.33979
METTL8	0	2	3	0.145927	6.55284	6.49725	5.19757
INTS14	0	1	2	0.175238	6.55695	6.17642	5.36974
NFKB2	0	0	1	0.159369	6.55989	5.70564	5.19281
MTX2	0	2	3	0.10004	6.58146	6.31818	5.0312
IDH3A	0	0	1	0.171165	6.58776	5.52814	5.25135
FRG1-DT	0	0	1	0.1662	6.59276	1.30892	-1.94491
AP1S2	1	0	5	0.845168	6.59427	5.54452	6.27402
AC090796.1	1	2	4	0.61796	1.91208	6.60943	-3.48045
DTNB	2	1	7	0.474537	5.5684	6.0096	6.6102
ADGRE2	2	1	7	0.557938	5.4047	5.70065	6.61889
HS3ST2	1	0	5	0.693842	6.63557	3.7208	5.0494
SLCO4C1	2	1	7	0.478981	4.05905	5.1044	6.64276
CCNG2	2	2	8	0.533573	5.28411	6.19699	6.64344
DSTN	0	0	1	0.145056	6.65833	6.0019	5.62988
ABLIM1	2	1	7	0.5282	5.42622	5.78629	6.66078
AL035446.2	0	1	2	0.177585	6.661	6.19098	5.18483
SPOCK1	0	0	1	0.330476	6.66249	4.1276	3.93102
SNN	2	1	7	0.499688	5.59513	5.96798	6.6695
FAAH	2	2	8	0.335096	5.35439	6.57222	6.6707
ORMDL1	0	2	3	0.165556	6.67624	6.39318	5.46583
UNC5C	0	2	3	0.184886	6.68902	5.56278	2.16897
BRWD3	0	0	1	0.214166	6.69114	5.54346	5.30946
RAB27B	2	1	7	0.585635	4.01236	4.55756	6.69412
GCNT1	0	0	1	0.226588	6.69418	5.93559	5.36705
BEX1	0	0	1	0.177111	6.70076	5.9905	5.53587
TBL2	0	0	1	0.144293	6.70358	6.02083	5.63516
INTS6L	0	0	1	0.121925	6.70737	5.73875	5.39663
DLX1	0	2	3	0.103199	6.71064	6.54229	4.8247
DST	0	2	3	0.0861802	6.72706	6.57509	5.56024
PPARGC1A	0	1	2	0.119701	6.72836	5.20316	2.88632
NXF3	0	0	1	0.111141	6.73611	5.63725	5.20305
LAMTOR4	0	0	1	0.357227	6.7452	5.68915	5.6345
COX5A	0	1	2	0.18591	6.75673	6.22062	5.6775
SEMA4C	2	1	7	0.475305	5.46778	6.0094	6.75792
RORB	0	0	1	0.451498	6.76206	5.45536	5.49868
TIAM1	0	2	3	0.176735	6.76502	5.43709	1.29557
SLFN13	2	2	8	0.400095	5.63369	6.55766	6.77121
ADGRB1	0	1	2	0.157738	6.77236	6.29523	5.35756
HSPG2	0	1	2	0.128425	6.78646	5.85202	4.64337
OAT	0	1	2	0.140276	6.80491	6.2963	5.37859
NFAM1	2	2	8	0.31853	5.5075	6.80814	6.75871
IFNGR2	2	0	6	0.536446	5.80214	5.9347	6.81079
SYTL1	2	1	7	0.531455	5.23033	6.28808	6.81487
AL589693.1	0	2	3	0.196553	6.81702	4.71513	-1.32621
LIPA	0	2	3	0.197932	6.81838	6.0063	3.68489
PRPS2	0	1	2	0.20157	6.81959	6.51996	5.8129
WDR61	0	1	2	0.18563	6.82488	6.4333	5.56683
SH3TC1	2	1	7	0.483875	5.30027	6.16609	6.82658
DNMT3B	2	1	7	0.47589	5.48205	6.20596	6.82662
PTP4A3	2	1	7	0.470575	5.19582	6.02277	6.8276
LFNG	2	0	6	0.394746	5.54832	5.26829	6.82892
TRMT11	0	1	2	0.222639	6.83207	6.14115	4.36736
AMMECR1	1	0	5	0.637797	6.8321	5.76047	6.03429
ZBTB33	0	0	1	0.41658	6.83496	5.7763	5.77913
TNN	0	2	3	0.152195	6.85088	6.39375	4.79913
MPP1	0	0	1	0.119407	6.87296	5.49525	4.99847
SPRY2	2	0	6	0.404109	5.74566	5.59064	6.89026
PRKAR1B	2	1	7	0.510768	5.49486	5.94906	6.89769
TMEM87B	0	1	2	0.186815	6.89858	6.58142	5.87622
LINC00426	2	2	8	1.0081	4.46575	6.90247	5.07081
DNAJA1	2	1	7	0.470781	5.8296	6.31438	6.91388
NAV2	0	0	1	0.124846	6.91651	5.74867	5.14999
ADAM22	0	0	1	0.242704	6.92401	6.03867	5.88812
PLIN3	0	2	3	0.177127	6.93838	6.69069	5.91951
COX7B	0	0	1	0.379219	6.94026	5.69638	5.65762
ENTPD6	0	1	2	0.220409	6.94041	6.62301	5.81539
CLCN5	0	0	1	0.16961	6.9465	6.27199	5.85147
RAB5B	1	2	4	1.04401	5.912	6.95915	6.06299
CUL4B	0	0	1	0.168674	6.96656	5.98773	5.72843
FAM193B	2	1	7	0.545373	5.949	6.21847	6.97268
RPS6KA2	0	2	3	0.224379	6.97591	6.59851	5.62238
AL031123.1	0	2	3	0.204875	6.98308	6.05918	3.48868
ITGA6	0	2	3	0.196928	6.96826	6.98581	4.83225
CKAP4	0	1	2	0.175934	7	6.02424	5.00155
AC004980.1	0	0	1	0.23256	7.00444	5.93932	5.74569
TSEN15	0	1	2	0.129031	7.00611	6.56397	5.99447
FMNL1	2	1	7	0.49264	5.18363	6.26479	7.01221
UBE2A	0	0	1	0.326378	7.02203	5.87253	5.77874
METAP1D	0	2	3	0.359899	6.72424	7.03568	4.87081
PHACTR3	0	2	3	0.179824	7.04985	7.03216	4.84664
TMEM185B	0	2	3	0.0893379	7.05089	6.87966	5.90947
KLF6	2	1	7	0.504838	5.92013	6.3033	7.061
CXXC1	2	2	8	0.341144	5.72789	6.9409	7.06103
HIST1H2BH	2	2	8	0.350357	6.03064	6.94982	7.0634
SNHG14	2	2	8	0.372071	2.88587	7.06709	6.29977
NABP1	0	0	1	0.21329	7.07461	6.06995	5.34678
DENND4A	0	1	2	0.139962	7.07959	6.56111	5.93346
USP8	0	1	2	0.191853	7.07964	6.7205	5.90548
PMS1	0	2	3	0.21791	7.05567	7.08424	6.03758
SCPEP1	2	2	8	0.506836	5.65216	6.65193	7.08762
CD99L2	0	0	1	0.231085	7.08838	6.06679	5.8793
GTF3C3	0	2	3	0.197976	7.09389	7.10392	6.00489
NHSL1	0	0	1	0.163136	7.10442	5.7048	5.32231
SH3BGRL	0	0	1	0.134286	7.10574	6.1518	5.63716
SOX4	2	1	7	0.478594	6.02851	6.46784	7.11048
E2F3	2	2	8	0.37026	5.8698	6.93465	7.11544
PDE8A	0	1	2	0.125674	7.1331	6.65434	5.86929
TRIB2	2	0	6	0.465185	5.87252	5.90565	7.13496
OCRL	0	0	1	0.129597	7.14334	6.15803	5.82889
CBWD2	0	1	2	0.255165	7.14379	6.52894	6.02584
SASH3	1	0	5	1.00362	7.14667	6.08569	7.05172
SNHG8	0	1	2	0.156904	7.16389	6.5861	5.93646
EIF2AK4	0	1	2	0.204591	7.16634	6.86739	6.15333
MS4A3	0	2	3	0.4031	6.72356	7.16726	4.65343
RALA	2	0	6	0.527651	6.08888	6.21949	7.17659
AC007100.1	0	1	2	0.164072	7.20778	4.63346	-0.569906
LYZ	0	2	3	0.0871172	7.23146	6.85218	4.13917
CTDP1	2	2	8	0.516144	6.17958	6.90464	7.23392
AC079781.5	0	0	1	0.395231	7.23992	5.15714	5.12278
IRF8	0	2	3	0.132251	7.2414	6.58879	4.0607
CLPX	0	1	2	0.135949	7.27787	6.82694	6.2697
MGST3	0	2	3	0.438018	7.02248	7.28047	6.00479
PRTN3	1	2	4	0.607146	5.38316	7.29837	2.60777
CTSH	0	0	1	0.407783	7.30121	6.07118	6.06481
CIAO2A	0	1	2	0.125249	7.30217	6.85922	6.2722
KIF18B	2	2	8	0.375188	5.42057	7.03175	7.32237
FURIN	0	2	3	0.271684	7.08153	7.32755	3.98429
NDFIP1	0	0	1	0.191474	7.33839	6.61258	6.12503
DNAJC1	2	0	6	0.529009	6.28494	6.41493	7.35169
WDR75	0	2	3	0.0941599	7.3643	7.24416	6.20613
LINC00906	1	0	5	0.63815	7.37713	6.25066	6.54355
NMT1	2	2	8	0.337575	5.77798	7.25055	7.38097
ZNF275	0	0	1	0.183657	7.38527	6.23579	5.4834
ZC3H15	0	2	3	0.105538	7.38657	7.20671	6.37112
AIF1	2	1	7	0.477228	5.87869	6.50968	7.4123
GABPB1-AS1	0	1	2	0.122134	7.41323	6.67511	5.66638
UCHL5	0	2	3	0.186297	7.42142	7.1488	6.33208
MNDA	0	2	3	0.173401	7.42179	6.92718	5.36221
ETFA	0	1	2	0.122674	7.42708	6.97532	6.36172
TLN2	0	2	3	0.102542	7.4296	7.12903	5.69493
CLSPN	2	1	7	0.470328	6.1639	6.80312	7.43113
SORCS2	0	0	1	0.182383	7.4336	6.21258	5.91313
LNPK	0	2	3	0.147195	7.46952	7.42011	6.2265
SSR4	0	0	1	0.445099	7.48056	6.42547	6.45464
GALNT7	2	1	7	0.470932	6.49793	6.94899	7.50967
C7orf50	2	1	7	0.469144	6.37766	6.93324	7.51889
IGLL1	1	2	4	0.964822	0.632599	7.52417	0.89638
MLC1	1	2	4	0.60459	6.57791	7.53061	4.75255
TRIM4	0	0	1	0.441722	7.54048	6.24761	6.27957
AIG1	2	2	8	1.07531	4.4991	7.54705	5.07556
SMAD3	0	2	3	0.344774	7.34479	7.55043	5.99481
CDCA5	2	1	7	0.507571	6.40913	7.12556	7.55673
VPS8	0	0	1	0.123525	7.55923	6.71942	6.42645
SEC24D	0	2	3	0.179078	7.5725	7.25232	6.26369
NHSL2	0	0	1	0.559171	7.58991	6.47744	6.61281
GM2A	0	0	1	0.112278	7.60098	6.75101	6.35727
AKAP9	0	0	1	0.297604	7.60107	6.5506	6.43442
PRNP	0	0	1	0.179266	7.60811	6.78194	6.24916
ANKRD28	0	1	2	0.142184	7.61819	7.25609	6.59603
IMMP2L	0	1	2	0.119658	7.62342	7.05016	6.18037
GALK2	0	1	2	0.219299	7.62594	7.1725	6.02385
E2F2	2	0	6	0.505723	6.20934	6.33733	7.62825
WDR90	2	2	8	0.525246	6.581	7.62856	7.25899
IFI16	0	0	1	0.108983	7.63904	6.84685	6.51516
CDKAL1	0	0	1	0.3337	7.64429	6.66121	6.58808
SAPCD2	2	1	7	0.497529	6.3767	6.82333	7.64569
SIPA1	2	1	7	0.4768	6.29622	6.85429	7.64679
CREG1	0	2	3	0.261774	7.63076	7.71035	6.49146
FTX	0	0	1	0.173176	7.71922	6.63968	6.36085
DPY19L1	2	1	7	0.524148	6.56027	6.91219	7.73819
PHF19	2	2	8	0.456208	6.4044	7.40581	7.74483
DIAPH2	0	0	1	0.279442	7.75855	6.5274	6.36783
AL034397.3	1	0	5	0.705774	7.80477	6.64068	7.1992
CST3	0	0	1	0.155192	7.83253	7.16205	6.76597
ESPL1	2	2	8	0.461966	6.73579	7.56145	7.84999
SDK1	0	1	2	0.125874	7.87963	7.40292	6.61989
SLC25A12	0	2	3	0.0960163	7.88604	7.70816	6.11386
HIP1	1	0	5	0.697248	7.90186	6.85216	7.33803
CXCR4	0	1	2	0.2049	7.90218	7.34865	6.82131
LILRA2	2	0	6	0.394428	6.65173	6.35647	7.91544
MID1IP1	0	0	1	0.136528	7.92377	6.73811	6.35951
BRI3	0	0	1	0.39317	7.92489	6.76824	6.74699
FRMD3	0	0	1	0.172241	7.93189	6.68209	5.89559
RECQL4	2	1	7	0.496595	6.82582	7.49612	7.94163
EZH2	2	1	7	0.495656	6.8314	7.22777	7.94367
HIST2H3D	2	1	7	0.492076	6.81482	7.48276	7.9472
TMC6	2	1	7	0.497456	6.37719	6.93481	7.96077
ARHGAP15	0	2	3	0.10752	7.97392	7.73393	6.63731
HIST1H4A	2	2	8	0.445181	6.96211	7.73463	7.98002
COPS2	0	1	2	0.158899	7.98161	7.58656	6.80612
AZU1	0	2	3	0.377697	7.69666	7.98193	6.16983
BTK	0	0	1	0.129412	7.98274	7.1963	6.93327
PPP1R18	2	0	6	0.433772	6.76392	6.71766	7.98327
SLC9A3R1	2	0	6	0.424608	6.96763	6.49927	7.98339
SLC66A2	2	1	7	0.493312	6.76254	7.49117	7.99144
FAM111A	2	1	7	0.512022	6.73257	7.53795	8.00485
TMED3	0	2	3	0.144976	8.01281	7.79013	6.98476
PIM1	2	0	6	0.394483	6.80505	6.52818	8.01317
ZNF438	0	2	3	0.182552	8.02034	7.52099	6.00154
FAH	0	2	3	0.128766	8.03894	7.96167	6.72381
LSP1	2	0	6	0.439671	6.27775	6.23486	8.04561
MT-ND2	0	2	3	0.0969882	8.07236	7.85554	6.76043
CDK14	0	0	1	0.214409	8.08346	7.16086	6.97303
ASS1	0	2	3	0.110507	8.11151	7.99688	6.67207
GNS	0	1	2	0.127121	8.12331	7.53184	6.55029
MORF4L2	0	0	1	0.163265	8.14031	7.37892	6.91508
TRIB3	1	0	5	0.636786	8.15358	7.07527	7.28801
SPTAN1	2	1	7	0.48704	7.17181	7.55882	8.19388
TMEM163	0	2	3	0.307132	7.99403	8.21701	6.04188
NIBAN1	0	1	2	0.17993	8.21941	7.88363	7.15783
STK26	0	0	1	0.292266	8.22431	7.06984	6.93577
ANPEP	0	2	3	0.114629	8.22544	8.12489	6.87802
DYNC1I2	0	2	3	0.300018	8.04262	8.22836	6.3094
TXN	2	2	8	0.392736	7.11079	8.0353	8.23546
RLIM	0	0	1	0.26488	8.23866	7.32238	7.18926
TBC1D2B	0	2	3	0.139592	8.23924	7.99262	7.07519
NOTCH1	2	1	7	0.530949	7.00337	7.36345	8.25828
EMB	0	2	3	0.0983077	8.26706	8.03609	6.8865
COL23A1	0	2	3	0.111399	8.28978	8.06356	5.40903
ITPR3	2	1	7	0.531539	7.20422	7.5184	8.30302
SMYD3	0	1	2	0.139121	8.30594	7.80345	6.9025
MT-ATP6	0	2	3	0.191373	8.31099	8.31448	7.12555
POLA1	0	1	2	0.12284	8.34378	7.90669	7.31411
SCCPDH	0	2	3	0.0874124	8.35343	8.16873	6.83039
VEGFA	0	0	1	0.168366	8.37224	7.69673	7.27746
MT-CYB	0	2	3	0.0923484	8.40923	8.27008	7.11288
LAMP5	0	2	3	0.113706	8.41186	8.01974	3.23357
LINC00926	0	1	2	0.156502	8.41837	7.85356	6.7498
HIST1H2AI	2	1	7	0.491528	7.35556	7.98896	8.43191
TENT5C	2	1	7	0.476129	7.44514	7.99011	8.45539
PAK2	0	0	1	0.224704	8.45976	7.26096	7.03187
DOCK11	1	0	5	0.671979	8.45992	7.30729	7.77414
MT-ND1	0	2	3	0.0908872	8.46454	8.32818	7.23169
ELANE	0	2	3	0.107364	8.49027	8.15531	4.48553
APMAP	0	1	2	0.236149	8.51392	7.89056	7.3509
ATP5MC3	0	2	3	0.147399	8.53075	8.26647	7.32239
ADAM10	0	1	2	0.127055	8.53777	8.05528	7.42498
MT-CO2	0	2	3	0.173773	8.56417	8.26476	7.31896
OLA1	0	2	3	0.149364	8.58103	8.25336	7.09428
SSBP3	2	1	7	0.54509	7.51864	7.79956	8.58399
DMXL2	0	1	2	0.190768	8.63632	8.31347	7.58403
CUX1	2	1	7	0.508931	7.49314	8.2238	8.65847
ARID1B	0	2	3	0.0866982	8.69148	8.55328	7.58615
HIST1H3F	2	1	7	0.471566	7.40228	8.09115	8.74055
METTL9	2	0	6	0.394849	7.77397	7.51039	8.77815
NSMAF	1	0	5	0.645552	8.78564	7.62016	7.98565
KCNQ5	0	0	1	0.395365	8.79983	7.46486	7.443
KMT2C	2	0	6	0.573494	7.73377	7.9216	8.80029
IL17RA	2	1	7	0.5435	7.51721	7.86186	8.81182
GPNMB	0	1	2	0.165932	8.85003	7.98806	6.23164
MT-ND5	0	2	3	0.229049	8.81166	8.86245	7.49617
PDE4D	0	1	2	0.135251	8.86443	8.33534	7.67901
CST7	0	2	3	0.0865273	8.98884	8.60129	6.19295
ARHGEF6	0	0	1	0.353477	9.03899	8.0632	8.00923
SPTLC2	2	1	7	0.513523	7.85984	8.24278	9.06255
LAMP2	0	0	1	0.109727	9.10649	8.19351	7.78838
NCAPG2	2	1	7	0.475643	7.94755	8.5812	9.1269
PLOD3	0	0	1	0.210375	9.13249	8.06319	7.84015
LSS	2	1	7	0.504104	8.06008	8.42478	9.14098
TFRC	1	0	5	0.734881	9.18468	8.03361	8.64595
NEAT1	0	0	1	0.198112	9.2178	8.36578	8.17477
IRAK1	1	0	5	0.638391	9.3126	7.62504	8.06856
HIST1H4B	2	1	7	0.469505	8.08639	8.69538	9.31835
ZEB2	0	2	3	0.091077	9.34551	9.18185	7.85981
MGAT4B	2	0	6	0.452282	8.15439	8.15696	9.34983
H2AFV	2	1	7	0.492302	8.10988	8.56262	9.35165
HLA-B	0	0	1	0.121362	9.37454	8.61444	8.23331
SLC25A5	0	0	1	0.595719	9.3818	8.32277	8.48187
MT-ND4	0	2	3	0.0974728	9.40171	9.27529	8.11059
RPL39	0	0	1	0.323323	9.42645	8.45259	8.37019
GSTP1	2	2	8	0.473357	8.21548	9.10498	9.4351
PSAT1	0	0	1	0.269877	9.46927	8.34031	8.18241
OGT	0	0	1	0.381363	9.54325	8.3103	8.27432
HIST1H1D	2	1	7	0.480521	8.10551	8.90548	9.54336
AFF2	0	0	1	0.124296	9.60914	8.20135	7.71308
CBX5	2	1	7	0.504631	8.10808	9.11729	9.74033
SNRNP200	2	2	8	0.762914	8.77838	9.78212	9.22918
DHCR24	2	1	7	0.482043	8.77963	9.38862	9.86426
INSIG1	2	0	6	0.39441	8.82896	8.58095	9.87721
ITGA4	0	2	3	0.458307	9.63944	9.92175	8.6206
HIST1H1E	2	1	7	0.470097	8.86311	9.34949	9.93513
PLEC	2	1	7	0.481926	8.79416	9.2934	10.0604
HSPA8	2	1	7	0.471801	8.57971	9.23607	10.0739
LYST	0	2	3	0.0869669	10.1174	9.96491	8.88225
TNRC18	2	1	7	0.480064	8.98291	9.44611	10.139
CDK6	0	2	3	0.208083	10.1791	9.893	9.10678
HIST1H3B	2	1	7	0.481318	9.23852	9.83994	10.3143
CTSG	1	2	4	0.704418	8.76666	10.4162	7.90491
GLO1	0	1	2	0.157168	10.5322	9.92895	8.74645
PDK1	0	2	3	0.247448	10.4184	10.6127	6.95756
ITGB2	2	0	6	0.39485	9.57105	9.26154	10.7501
CD93	0	0	1	0.3919	10.9171	9.23774	9.20495
FASN	2	1	7	0.480647	9.80156	10.4335	10.9365
