# Supplementary material for: Functional and Multi-Omics Analysis of an Optimized CRISPR-Mediated FURIN Depletion in Cultured Pro-Monocytic Cells
Source: Preprints.org preprint supplement (doi:10.20944/preprints202312.0178.v1), 2023-12-04
Supplement: Supplementary file 2 [file supplementary › ST5.xlsx]

## Sheet: ST5
	Term	Overlap	P.value	Adjusted.P.value	Odds.Ratio	Combined.Score	Genes	pathway	som_cluster
04:01:00	MYB OE HUMAN GSE2816 CREEDSID GENE 2154 DOWN	22/469	1.51554e-06	0.00288862	3.53756	47.4024	MPP1;FCN1;IL1RN;SSR4;SAMD9;BCL2A1;BRI3;HLA-B;RPS27L;TNFAIP3;PILRA;LHFPL2;DDX60;C3;IFIH1;SDCBP;GM2A;IFI16;STK26;RLIM;SLC25A5;RPL39	tf_perturb	1
04:02:00	BCL6 KO MOUSE GSE40493 CREEDSID GENE 2772 UP	20/416	3.17135e-06	0.0030223	3.61279	45.7429	GBP5;PRNP;SSR4;NDUFA1;MYO5A;DSTN;UBE2A;CST3;SH3BGRL;CLCN5;GVINP1;GM2A;PSAT1;LAMP2;PADI2;CTSH;NABP1;ASB2;MBTPS2;ARHGEF6	tf_perturb	1
04:03:00	SP140 KD PBMC HUMAN GSE83381 RNASEQ DOWN	19/403	7.41624e-06	0.00471178	3.52854	41.6785	GBP5;IL1RN;RBM47;SLC22A5;SAMD9;GK;BCL2A1;IFNGR1;PLPPR3;MYOF;TNFAIP3;LHFPL2;NFKB2;C3;IFIH1;SDCBP;GM2A;LAMP2;NABP1	tf_perturb	1
04:04:00	SPDEF KD HUMAN GSE40985 CREEDSID GENE 2606 UP	17/350	1.53877e-05	0.00703129	3.6235	40.1555	SLC22A4;PRNP;SAMD9;IFNGR1;HLA-B;SAMD4A;TNFAIP3;LHFPL2;DDX60;RELB;VEGFA;IFIH1;DNM3;THBD;TMEM158;CTSH;SPOCK1	tf_perturb	1
04:05:00	CEBPA KD MOUSE GSE55760 CREEDSID GENE 2883 UP	14/250	1.84451e-05	0.00703129	4.18564	45.6265	SSR4;CD93;IFNGR1;RPS27L;F13A1;PLOD3;DSTN;C3;CST3;SEM1;SDCBP;LAMTOR4;FCGR2B;RPL39	tf_perturb	1
04:06:00	FOXP3 ACTIVATION HUMAN GSE41087 CREEDSID GENE 1054 DOWN	14/277	5.67876e-05	0.0138715	3.75073	36.6679	DYNC2H1;MPP1;RBM47;IFNGR1;GLCE;TTC7B;TNFAIP3;PBX4;RENBP;SDCBP;CYSLTR1;ZNF449;TCP11L2;ASB2	tf_perturb	1
04:07:00	ATF6 INDUCED MOUSE GSE8322 CREEDSID GENE 1473 UP	15/313	5.68123e-05	0.0138715	3.55314	34.7347	MCTS1;PRNP;NDFIP1;RPS27L;DSTN;NEAT1;SEM1;APOO;SDCBP;SH3BGRL;GVINP1;MORF4L2;LAMP2;RPL39;IDH3A	tf_perturb	1
04:08:00	MBD2 KO MOUSE GSE48653 CREEDSID GENE 1051 UP	17/389	5.82226e-05	0.0138715	3.23709	31.5656	CADM1;CD93;RPS27L;F13A1;DSTN;PILRA;ELL2;MTM1;C3;CST3;THBD;MORF4L2;LAMP2;BTK;BLNK;CTSH;FCGR2B	tf_perturb	1
04:09:00	E2F8 KO MOUSE GSE52157 CREEDSID GENE 2828 DOWN	17/406	9.81314e-05	0.0176427	3.0929	28.545	FCMR;IFNGR1;CST3;GVINP1;TESPA1;GM2A;SLC9A9;BTK;BLNK;IL21R;CTSH;UPRT;FYN;FCGR2B;ASB2;ABCD1;ARHGEF6	tf_perturb	1
04:10:00	RORA KO MOUSE GSE23736 CREEDSID GENE 1155 DOWN	14/292	9.96726e-05	0.0176427	3.54562	32.668	MPP1;PRNP;CD93;IFNGR1;RPS27L;F13A1;C3;CST3;SEM1;SDCBP;COL4A1;MORF4L2;BLNK;CTSH	tf_perturb	1
04:11:00	ERG KD HUMAN GSE14801 CREEDSID GENE 827 DOWN	16/368	0.00010182	0.0176427	3.21135	29.5197	PSMD10;PRNP;SSR4;CD93;BRI3;GLCE;PON2;HLA-B;DDX60;SEM1;SDCBP;SH3BGRL;IFI16;COL4A1;SPOCK1;CYTL1	tf_perturb	1
04:12:00	MYBL1 KO MOUSE GSE28025 CREEDSID GENE 377 UP	10/161	0.000124562	0.0197847	4.62606	41.5916	CST3;BEX1;NDFIP1;NXF3;MORF4L2;LAMP2;NDUFA1;DSTN;SLC25A5;RPL39	tf_perturb	1
04:13:00	IKZF1 KO MOUSE GSE46093 CREEDSID GENE 2547 DOWN	9/136	0.000168022	0.0246346	4.93869	42.9242	CLCN5;CD93;TESPA1;SLC9A9;PADI2;LPAR2;VAMP4;SLC37A3;RAB33A	tf_perturb	1
04:14:00	EZH2 KO MDAMB231 HUMAN GSE72524 RNASEQ DOWN	14/310	0.000186119	0.0253388	3.32692	28.5753	PLPPR3;HLA-B;CD99L2;UBE2A;VEGFA;CST3;MORF4L2;AKAP9;LAMP2;RLIM;SLC25A5;RPL39;OGT;CUL4B	tf_perturb	1
04:15:00	ZFX KO MOUSE GSE7069 CREEDSID GENE 177 UP	14/332	0.000373711	0.0474862	3.09325	24.412	MCTS1;PRNP;BEX1;PLOD3;DSTN;CST3;SDCBP;SH3BGRL;CLCN5;COL4A1;MORF4L2;LAMP2;RPL39;PHLDA1	tf_perturb	1
04:16:00	FOXP3 ACTIVATION HUMAN GSE41087 CREEDSID GENE 1054 UP	13/303	0.000511172	0.0608934	3.14279	23.8186	TIMM8A;CD93;TMEM120A;PON2;MYOF;MOSPD2;RORB;OR52K3P;NMRK1;IL21R;CTSH;SPOCK1;PHLDA1	tf_perturb	1
04:17:00	TP53 MUTATION HUMAN GSE27157 CREEDSID GENE 3046 UP	8/132	0.000692375	0.068572	4.4809	32.6002	COX7B;SSR4;HLA-B;NDUFA1;DDX60;SLC25A5;RPL39;CYP3A5	tf_perturb	1
04:18:00	DMRT1 KO MOUSE GSE27261 CREEDSID GENE 2740 UP	9/165	0.000698136	0.068572	4.01465	29.1748	C3;CST3;NDFIP1;NXF3;PSAT1;NDUFA1;DSTN;SLC25A5;RPL39	tf_perturb	1
04:19:00	ZFX KD HUMAN GSE43021 CREEDSID GENE 157 UP	12/275	0.00071858	0.068572	3.19178	23.1029	C3;FCN1;SDCBP;CYSLTR1;SAMD9;MYOF;F13A1;NABP1;ACPP;FCGR2B;RPL39;ARHGEF6	tf_perturb	1
04:20:00	SP1 KD HUMAN GSE37935 CREEDSID GENE 2219 UP	12/276	0.000741734	0.068572	3.17953	22.9133	MCTS1;PSMD10;COX7B;SSR4;MORF4L2;PON2;SLC10A3;LAMP2;NDUFA1;UBE2A;SLC25A5;RPL39	tf_perturb	1
04:21:00	ZXDC DEPLETION HUMAN GSE45417 CREEDSID GENE 3044 DOWN	13/316	0.000755516	0.068572	3.00593	21.607	FCMR;DOCK3;CADM1;BCL2A1;TNFAIP3;PILRA;FBXO32;C3;THBD;CTSH;VAMP4;FCGR2B;PHLDA1	tf_perturb	1
04:22:00	NFYB KD MOUSE GSE56838 CREEDSID GENE 1342 DOWN	11/247	0.00100643	0.0813393	3.25336	22.4525	OVGP1;CUBN;PORCN;GM2A;NOS3;PSAT1;BLNK;MITF;NEAT1;BRWD3;VEGFA	tf_perturb	1
04:23:00	GATA6 KO MOUSE GSE47049 CREEDSID GENE 2225 UP	12/287	0.00104037	0.0813393	3.05062	20.9522	MPP1;SEM1;SDCBP;SH3BGRL;NDFIP1;GVINP1;IFNGR1;LAMP2;RPS27L;F13A1;SLC25A5;FCGR2B	tf_perturb	1
04:24:00	MYC OE MOUSE GSE10954 CREEDSID GENE 184 UP	12/289	0.00110417	0.0813393	3.02828	20.6186	C3;SDCBP;PRNP;SH3BGRL;IFNGR1;COL4A1;CYP2S1;MORF4L2;LAMP2;CTSH;DSTN;MTM1	tf_perturb	1
04:25:00	GFI1B OE MOUSE GSE33709 CREEDSID GENE 772 UP	11/250	0.00110956	0.0813393	3.21202	21.8539	GBP5;PRNP;CYSLTR1;GVINP1;TESPA1;ZSCAN21;NABP1;VAMP4;PHLDA1;SLC37A3;MBTPS2	tf_perturb	1
04:26:00	GFI1B OE MOUSE GSE33709 CREEDSID GENE 452 DOWN	11/250	0.00110956	0.0813393	3.21202	21.8539	GBP5;PRNP;CYSLTR1;GVINP1;TESPA1;ZSCAN21;NABP1;VAMP4;PHLDA1;SLC37A3;MBTPS2	tf_perturb	1
04:27:00	TP63 DEPLETION HUMAN GSE5993 CREEDSID GENE 90 UP	10/214	0.00117986	0.0832896	3.41492	23.0246	IFIH1;SDCBP;IL1RN;SAMD9;IFI16;MYOF;HLA-B;DDX60;SLC25A5;RPL39	tf_perturb	1
04:28:00	KMT2A KO MOUSE GSE24964 CREEDSID GENE 3009 DOWN	12/293	0.00124154	0.0845136	2.98456	19.9709	C3;IFIH1;CST3;MPP1;THBD;IL1RN;SH3BGRL;GVINP1;CD93;IFNGR1;PLOD3;WASHC3	tf_perturb	1
04:29:00	ESR1 KD HUMAN GSE27473 CREEDSID GENE 480 UP	12/301	0.00155897	0.0976081	2.90075	18.7497	MPP1;F8;TMEM158;SAMD9;IFI16;SDHAF3;COL4A1;PSAT1;DPYD;SPOCK1;DDX60;PHLDA1	tf_perturb	1
04:30:00	REST INHIBITION HUMAN GSE40695 CREEDSID GENE 1710 UP	11/261	0.00156508	0.0976081	3.06896	19.8249	MPP1;CUBN;F8;SEMA6A;DOCK3;LRRC7;GLCE;DPYD;MAP7;ARHGEF6;STXBP5L	tf_perturb	1
04:31:00	HEY2 KO MOUSE GSE6526 CREEDSID GENE 1508 UP	12/303	0.001648	0.0976081	2.88052	18.4589	C3;MCTS1;THBD;GM2A;MORF4L2;MID1IP1;LAMP2;NDUFA1;CTSH;RPS27L;DSTN;SLC25A5	tf_perturb	1
04:32:00	HEY2 KO MOUSE GSE6526 CREEDSID GENE 1509 DOWN	12/303	0.001648	0.0976081	2.88052	18.4589	C3;MCTS1;THBD;GM2A;MORF4L2;MID1IP1;LAMP2;NDUFA1;CTSH;RPS27L;DSTN;SLC25A5	tf_perturb	1
04:33:00	THRB DOMNEG MOUSE GSE3067 CREEDSID GENE 2435 UP	10/225	0.00171408	0.0976081	3.23837	20.6248	C3;CST3;APOO;BEX1;GVINP1;MPC1;NDUFA1;DSTN;CYTL1;PHLDA1	tf_perturb	1
04:34:00	ZNF148 KD HUMAN GSE31092 CREEDSID GENE 2162 UP	12/305	0.00174117	0.0976081	2.86056	18.1737	SEM1;SDCBP;BEX1;MORF4L2;STK26;LAMP2;RLIM;NDUFA1;RPS27L;DSTN;GLRX2;RPL39	tf_perturb	1
04:35:00	ELF4 KO MOUSE GSE15324 CREEDSID GENE 2839 UP	9/189	0.00180693	0.0984002	3.47509	21.9491	GATM;BEX1;NDFIP1;PSAT1;MORF4L2;NABP1;CHM;RPL39;ELL2	tf_perturb	1
04:36:00	PAX5 OE HUMAN GSE44244 CREEDSID GENE 574 UP	17/541	0.00245955	0.13022	2.28002	13.6979	MPP1;GBP5;RBM47;SAMD9;DDX60;NXT2;AFF2;C3;SCML1;TESPA1;SLC9A9;CTSH;CLIC2;FCGR2B;CALN1;ARHGEF6;CREB5	tf_perturb	1
04:37:00	CEBPA KO MOUSE GSE61468 CREEDSID GENE 1476 DOWN	11/278	0.00256109	0.131931	2.87105	17.1325	SLC22A4;C3;CST3;C1GALT1C1;GATM;RBM47;CTSH;F13A1;PLOD3;APBA1;FCGR2B	tf_perturb	1
04:38:00	HNF4A MUT MOUSE GSE3116 CREEDSID GENE 850 DOWN	11/281	0.00278097	0.139487	2.83871	16.7057	CST3;SEM1;GATM;SDS;NDFIP1;IFNGR1;BRI3;GNA11;NDUFA1;RPS27L;RPL39	tf_perturb	1
04:39:00	NEUROD1 KO MOUSE GSE35396 CREEDSID GENE 3089 UP	10/243	0.00299735	0.143674	2.98544	17.3455	RBM47;GM2A;SV2B;PPP2R2B;CACNA2D3;PADI2;DSTN;SIPA1L2;IDH3A;CUL4B	tf_perturb	1
04:40:00	ASCL1 KO G523NS HUMAN GSE87617 RNASEQ UP	14/415	0.00310276	0.143674	2.4425	14.1066	SLC22A5;CADM1;MYOF;HLA-B;RPS27L;DSTN;FBXO32;EFR3B;COL4A1;MORF4L2;AKAP9;LAMP2;OGT;CUL4B	tf_perturb	1
04:41:00	NEUROG1 OE HUMAN GSE18296 CREEDSID GENE 1426 DOWN	12/328	0.00316005	0.143674	2.64921	15.252	SLC22A4;C3;PORCN;BEX1;COL4A1;NMRK1;GCNT1;HLA-B;SPOCK1;FBXO32;LTBP1;VEGFA	tf_perturb	1
04:42:00	EGR3 KD HUMAN GSE52108 CREEDSID GENE 2233 UP	7/132	0.00316595	0.143674	3.87548	22.3045	FRMD3;IFT22;SDHAF3;PADI2;CDK14;SORCS2;INTS6L	tf_perturb	1
04:43:00	HSF1 KD HUMAN GSE3697 CREEDSID GENE 781 DOWN	14/422	0.00359934	0.159543	2.39972	13.5033	ZNF573;GLCE;SLC10A3;CHM;TNFAIP3;TRMT2B;DDX60;C3;DNM3;DEPTOR;SV2B;PDE4B;FYN;MBTPS2	tf_perturb	1
04:44:00	PPARG OE MOUSE GSE10192 CREEDSID GENE 2732 UP	7/137	0.00388797	0.165227	3.72547	20.6759	MCTS1;IL1RN;GM2A;IFNGR1;PLOD3;SORCS2;LAGE3	tf_perturb	1
04:45:00	ETS2 KD HUMAN GSE43459 CREEDSID GENE 2888 DOWN	12/337	0.00392299	0.165227	2.57465	14.2659	SH3BGRL;GK;FAM151B;PSAT1;RFX3;TCP11L2;PLOD3;MITF;LHFPL2;CLIC2;PAK2;SLC37A3	tf_perturb	1
04:46:00	DOT1L DELETION MOUSE GSE25911 CREEDSID GENE 453 UP	10/253	0.00398765	0.165227	2.86111	15.8064	C3;CST3;SEM1;NHSL2;SH3BGRL;NDUFA1;DSTN;SLC25A5;FCGR2B;RPL39	tf_perturb	1
04:47:00	SOX9 OE MOUSE GSE34060 CREEDSID GENE 2743 DOWN	8/177	0.00438895	0.177986	3.2802	17.8071	CST3;FCMR;GATM;CD93;SSR4;BTK;RPS27L;ELL2	tf_perturb	1
04:48:00	ASCL1 KO G523NS HUMAN GSE87615 RNASEQ UP	12/344	0.0046135	0.181495	2.51946	13.5516	CST3;SLC22A5;NDFIP1;TMEM158;CADM1;SSR4;PLPPR2;IFI16;PON2;SPOCK1;CD99L2;SLC25A5	tf_perturb	1
04:49:00	ZNF395 KD HUMAN GSE49613 CREEDSID GENE 813 UP	11/301	0.00466592	0.181495	2.64022	14.1713	CST3;PRNP;COX7B;TMEM158;SAMD9;BRI3;LAMP2;NDUFA1;RPS27L;LHFPL2;PHLDA1	tf_perturb	1
04:50:00	VDR KO MOUSE GSE2421 CREEDSID GENE 1152 DOWN	10/260	0.00482306	0.183855	2.78	14.8295	GM2A;MPC1;BRI3;MYOF;BLNK;CTSH;NEAT1;SLC25A5;FCGR2B;RENBP	tf_perturb	1
04:51:00	SETDB1 KD THP1 HUMAN GSE103409 SGRNA6DAY4 RNASEQ DOWN	9/221	0.00510177	0.185368	2.94571	15.548	SDCBP;SH3BGRL;SLC22A5;PSAT1;HLA-B;TNFAIP3;RPL39;OGT;VEGFA	tf_perturb	1
04:52:00	HMGA2 KD HUMAN GSE43741 CREEDSID GENE 2854 UP	13/394	0.00517138	0.185368	2.38094	12.5347	DYNC2H1;ZNF275;PECR;SEMA6A;DOCK3;GK;STAG3L4;PON2;ZBTB33;STXBP5L;CLCN5;TMEM117;MAP7	tf_perturb	1
04:53:00	SETDB1 KO MOUSE GSE40296 CREEDSID GENE 31 UP	9/222	0.00525176	0.185368	2.93173	15.3892	CST3;LMO1;SEM1;PRNP;SH3BGRL;PSAT1;MORF4L2;RPS27L;MTM1	tf_perturb	1
04:54:00	VDR KO MOUSE GSE2421 CREEDSID GENE 2719 DOWN	9/222	0.00525176	0.185368	2.93173	15.3892	C3;GM2A;IFNGR1;MPC1;NDUFA1;CTSH;NEAT1;SLC25A5;RENBP	tf_perturb	1
04:55:00	BCL11B KO MOUSE GSE9330 CREEDSID GENE 28 UP	12/354	0.00576533	0.197022	2.44453	12.6037	LMO1;GLRA2;GATM;GRIN3A;CADM1;KIF26B;MID1IP1;NXT2;PHLDA1;NTSR1;MYO16;AFF2	tf_perturb	1
04:56:00	GATA6 KO MOUSE GSE11165 CREEDSID GENE 1165 UP	9/226	0.00588618	0.197022	2.8771	14.7743	SH3BGRL;MORF4L2;LAMP2;NDUFA1;CTSH;DSTN;NEAT1;RPL39;PHLDA1	tf_perturb	1
04:57:00	GATA3 OE HUMAN GSE24249 CREEDSID GENE 649 UP	12/355	0.00589205	0.197022	2.43728	12.5133	FRMD3;VLDLR-AS1;SH3BGRL;PORCN;CLCN5;SLC22A5;ZDHHC9;DPYD;LPAR2;TNFAIP3;MTM1;CUL4B	tf_perturb	1
04:58:00	PITX2 KO MOUSE GSE50399 CREEDSID GENE 3060 DOWN	11/313	0.00621191	0.199347	2.53374	12.8747	SEM1;RYR2;PRNP;NDFIP1;COL4A1;MORF4L2;LAMP2;NDUFA1;DSTN;MITF;SLC25A5	tf_perturb	1
04:59:00	GATA4 ABLATION MOUSE GSE30314 CREEDSID GENE 838 DOWN	9/229	0.00639961	0.199347	2.83743	14.3333	SLC22A4;C3;CYSLTR1;BEX1;KIF26B;TREX2;CTSH;PILRA;FCGR2B	tf_perturb	1
0.208333	ZNF207 OE HUMAN GSE9951 CREEDSID GENE 1581 DOWN	12/360	0.00655919	0.199347	2.40164	12.0728	THBD;TMEM158;BCL2A1;PPP2R2B;NHS;NABP1;TNFAIP3;DDX60;ELL2;PHLDA1;VEGFA;CREB5	tf_perturb	1
0.209028	IRF1 OE MOUSE GSE6505 CREEDSID GENE 2076 DOWN	10/272	0.0065694	0.199347	2.65104	13.3223	C3;CST3;MPP1;SEM1;PRNP;SH3BGRL;COL4A1;MORF4L2;LAMP2;DSTN	tf_perturb	1
0.209722	BHLHA15 KO MOUSE GSE3644 CREEDSID GENE 785 DOWN	6/115	0.00664967	0.199347	3.79913	19.0458	CST3;SDCBP;RAB3D;RPS27L;NEAT1;ELL2	tf_perturb	1
0.210417	U2AF1 OE CFUG HUMAN GSE94153 RNASEQ DOWN	8/190	0.00666922	0.199347	3.04388	15.2506	FCN1;IL1RN;GM2A;BCL2A1;IFNGR1;NABP1;CTSH;PILRA	tf_perturb	1
0.211111	RUNX1 KD HUMAN GSE29639 CREEDSID GENE 1288 DOWN	11/317	0.00680824	0.199347	2.50011	12.4746	FCMR;NDFIP1;SEMA6A;PSAT1;GLCE;PDE4B;DSTN;CYTL1;FTX;LTBP1;CALN1	tf_perturb	1
0.211806	HNF4A KO MOUSE GSE11759 CREEDSID GENE 2360 DOWN	10/274	0.0069029	0.199347	2.63068	13.0898	SLC22A4;C3;CUBN;COL4A1;CYP2S1;GNA11;DPYD;REPS2;FBXO32;RELB	tf_perturb	1
0.2125	KMT2A KO MOUSE GSE24964 CREEDSID GENE 3008 DOWN	10/274	0.0069029	0.199347	2.63068	13.0898	C3;IFIH1;CST3;MPP1;THBD;IL1RN;SH3BGRL;GVINP1;CD93;IFNGR1	tf_perturb	1
0.213194	ETS2 KD HUMAN GSE43459 CREEDSID GENE 34 UP	11/321	0.00744851	0.210688	2.46734	12.0893	GK;FAM151B;PSAT1;GLCE;RFX3;TCP11L2;PLOD3;MITF;CLIC2;PAK2;SLC37A3	tf_perturb	1
0.213889	ETS2 KD HUMAN GSE43459 CREEDSID GENE 156 DOWN	11/322	0.00761569	0.210688	2.45928	11.9952	GK;FAM151B;PSAT1;GLCE;RFX3;TCP11L2;PLOD3;MITF;CLIC2;PAK2;SLC37A3	tf_perturb	1
0.214583	IRX5 KO MOUSE GSE38826 CREEDSID GENE 2744 UP	11/323	0.00778579	0.210688	2.45127	11.902	RYR2;PRNP;GCNT1;TRMT12;TCP11L2;CDKAL1;PEX1;NXT2;ARHGEF6;AFF2;IDH3A	tf_perturb	1
0.215278	FOXP1 OE HUMAN GSE51382 CREEDSID GENE 1434 UP	10/279	0.00779419	0.210688	2.58112	12.5297	IFNGR1;CD70;HLA-B;NDUFA1;CTSH;RPS27L;TNFAIP3;SLC25A5;FCGR2B;RPL39	tf_perturb	1
0.215972	IRF8 KO MOUSE GSE39228 CREEDSID GENE 2195 UP	9/237	0.00793777	0.210688	2.73675	13.2353	C3;NHSL2;FCMR;RAB3D;DSTN;TNFAIP3;LHFPL2;LAMTOR4;PHLDA1	tf_perturb	1
0.216667	IRF9 KD HUMAN GSE50588 CREEDSID GENE 2809 UP	11/324	0.00795883	0.210688	2.44331	11.8097	GATM;TBL2;SEMA6A;ZDHHC9;MID1IP1;PDE4B;TNFAIP3;ASB2;RAB33A;BRWD3;PIGX	tf_perturb	1
0.217361	MECP2 KO MOUSE GSE8720 CREEDSID GENE 2418 UP	9/239	0.00836297	0.218354	2.71267	12.9773	SV2B;COL4A1;PON2;FTX;SIPA1L2;FBXO32;SORCS2;NTSR1;MYO16	tf_perturb	1
0.218056	HOXA9 OE HUMAN GSE43741 CREEDSID GENE 2856 UP	11/328	0.00868111	0.22336	2.41198	11.4487	CUBN;COX7B;GATM;BCL2A1;COL4A1;PDE4B;NDUFA1;F13A1;FCGR2B;RPL39;LTBP1	tf_perturb	1
0.21875	SETDB1 KD THP1 HUMAN GSE103409 SGRNA9DAY7 RNASEQ DOWN	6/122	0.0087891	0.22336	3.5686	16.8946	CST3;SH3BGRL;SLC22A5;HLA-B;RPL39;OGT	tf_perturb	1
0.219444	VDR KO MOUSE GSE2421 CREEDSID GENE 1153 DOWN	10/286	0.00918817	0.23043	2.51475	11.7938	C3;GM2A;MPC1;BRI3;LAMP2;NDUFA1;CTSH;NEAT1;SLC25A5;RENBP	tf_perturb	1
0.220139	FOXP3 ACTIVATION HUMAN GSE41087 CREEDSID GENE 1055 UP	9/244	0.00950176	0.235199	2.65427	12.359	ZNF331;PRNP;AFDN;PON2;CTSH;TNFAIP3;SPOCK1;PBX4;RENBP	tf_perturb	1
0.220833	NR5A2 KD HUMAN GSE47803 CREEDSID GENE 1818 UP	11/335	0.0100663	0.242501	2.35902	10.8481	SAMD9;IFNGR1;BRI3;HLA-B;SAMD4A;NABP1;TNFAIP3;SPOCK1;LHFPL2;FBXO32;ELL2	tf_perturb	1
0.221528	DLX5 DEFICIENCY MOUSE GSE22381 CREEDSID GENE 383 UP	6/126	0.0102121	0.242501	3.44894	15.8106	DYNC2H1;PADI2;CHM;SORCS2;BRWD3;EPOR	tf_perturb	1
0.222222	NRL DEFICIENCY MOUSE GSE4051 CREEDSID GENE 263 DOWN	9/247	0.0102391	0.242501	2.62041	12.0055	CST3;SH3BGRL;GLRA2;BEX1;CADM1;PSAT1;PADI2;RORB;FTX	tf_perturb	1
0.222917	IRF9 OE HUMAN GSE50002 CREEDSID GENE 1661 UP	8/205	0.0103056	0.242501	2.80995	12.8557	DEPTOR;GM2A;ADAM22;PADI2;TCP11L2;TNFAIP3;PHLDA1;PPIL6	tf_perturb	1
0.223611	NEUROG3 OE MOUSE GSE3653 CREEDSID GENE 2290 DOWN	8/206	0.0105917	0.246192	2.79562	12.7136	SEM1;BEX1;COL4A1;MORF4L2;RPS27L;RPL39;PHLDA1;MTM1	tf_perturb	1
0.224306	MYRF KO MOUSE GSE15303 CREEDSID GENE 2306 UP	10/293	0.0107656	0.246811	2.45167	11.1095	CST3;SH3BGRL;BEX1;NDFIP1;PPP2R2B;NDUFA1;FYN;LHFPL2;SIPA1L2;NEAT1	tf_perturb	1
0.225	DUX4 OE HUMAN GSE33799 CREEDSID GENE 1430 UP	10/294	0.0110068	0.246811	2.44291	11.0157	IFIH1;SAMD9;IFI16;PHF11;HLA-B;SAMD4A;MYO5A;VAMP4;DDX60;FBXO32	tf_perturb	1
0.225694	SREBF2 KD HUMAN GSE50588 CREEDSID GENE 2823 UP	10/294	0.0110068	0.246811	2.44291	11.0157	PRNP;FCMR;GM2A;BRI3;PSAT1;PDE4B;DNASE2;LHFPL2;FBXO32;PIGX	tf_perturb	1
01:01:00	Leishmaniasis	1972-05-01	7.54994e-05	0.0167287	12.7458	120.975	ITGAM;NCF1;IFNGR2;ITGB2;TNF	bioplanet	6
01:02:00	Adhesion and diapedesis of granulocytes	2022-03-15	9.31964e-05	0.0167287	42.0911	390.639	ITGAM;ITGB2;TNF	bioplanet	6
01:03:00	Integrin family cell surface interactions	2022-03-26	0.000507307	0.0335365	21.9484	166.509	ITGAM;ITGB2;ITGAX	bioplanet	6
01:04:00	MSP/RON receptor signaling pathway	2022-02-06	0.000535929	0.0335365	83.5084	628.944	CCL2;TNF	bioplanet	6
01:05:00	TWEAK regulation of gene expression	2022-03-27	0.00056821	0.0335365	21.0328	157.179	TNFRSF12A;CCL2;TNF	bioplanet	6
01:06:00	Interleukin-2 signaling pathway	14/847	0.000606875	0.0335365	2.9916	22.1593	ITGAM;CD300A;KMT2C;ITGB2;ARAP2;LSP1;TNF;SLC9A3R1;IL18RAP;CYTH4;PIM1;ITGAX;E2F2;TRIB2	bioplanet	6
01:07:00	Integrin beta-2 pathway	2022-03-29	0.000703598	0.0335365	19.413	140.925	ITGAM;ITGB2;ITGAX	bioplanet	6
01:08:00	Cation-coupled chloride cotransporters	2022-02-07	0.000747331	0.0335365	66.8034	480.918	SLC12A5;SLC12A6	bioplanet	6
01:09:00	Interleukin-23-mediated signaling events	1937-03-01	0.0014444	0.0576155	14.8392	97.0495	IL18RAP;CCL2;TNF	bioplanet	6
01:10:00	Monocyte and its surface molecules	2022-02-11	0.00192653	0.0632904	37.1055	231.985	ITGAM;ITGB2	bioplanet	6
01:11:00	Alpha-M beta-2 integrin signaling	1941-03-01	0.00194711	0.0632904	13.2745	82.8518	ITGAM;ITGB2;TNF	bioplanet	6
01:12:00	PI3K class IB pathway in neutrophils	1943-03-01	0.00223445	0.0632904	12.6095	76.9656	CYTH4;NCF1;BMX	bioplanet	6
01:13:00	TGF-beta regulation of extracellular matrix	10/565	0.00229185	0.0632904	3.13676	19.0665	KLF10;ITGAM;TNFRSF12A;INSIG1;PIM1;PDGFA;GAS1;E2F2;BTBD11;AEBP1	bioplanet	6
01:14:00	Malaria	1951-03-01	0.00364061	0.0933556	10.5037	58.9847	ITGB2;CCL2;TNF	bioplanet	6
01:15:00	Leptin influence on immune response	4/110	0.00449438	0.104382	6.37736	34.4692	ITGAM;ITGAX;CCL2;TNF	bioplanet	6
01:16:00	Cells and molecules involved in local acute inflammatory response	2022-02-17	0.00465211	0.104382	22.2566	119.527	ITGB2;TNF	bioplanet	6
01:17:00	Cytokine-cytokine receptor interaction	6/265	0.00552953	0.114708	3.95232	20.5428	IL18RAP;TNFRSF12A;IFNGR2;PDGFA;CCL2;TNF	bioplanet	6
01:18:00	RAGE pathway	1960-03-01	0.00575139	0.114708	8.84121	45.6058	PDGFA;CCL2;TNF	bioplanet	6
01:19:00	Interleukin-3 regulation of hematopoietic cells	2022-02-20	0.00642281	0.121357	18.5444	93.61	CD86;TNF	bioplanet	6
01:20:00	Modulation of interferon signaling by chaperones	2022-02-23	0.008452	0.142369	15.8928	75.8617	IFNGR2;TNF	bioplanet	6
01:21:00	Th1/Th2 differentiation pathway	2022-02-23	0.008452	0.142369	15.8928	75.8617	CD86;IFNGR2	bioplanet	6
01:22:00	Cell adhesion molecules (CAMs)	4/133	0.00872456	0.142369	5.23421	24.8186	CD86;ITGAM;ITGB2;CD22	bioplanet	6
01:23:00	TNF-alpha effects on cytokine activity, cell motility, and apoptosis	4/135	0.00918295	0.143334	5.15378	24.1733	LFNG;IFNGR2;CCL2;TNF	bioplanet	6
01:24:00	Natural killer cell-mediated cytotoxicity	4/137	0.00965678	0.144449	5.07577	23.552	IFNGR2;ITGB2;TNF;HCST	bioplanet	6
01:25:00	RANKL regulation of apoptosis and immune response	1974-03-01	0.0102499	0.147189	7.09286	32.4888	CD86;CCL2;TNF	bioplanet	6
01:26:00	Interleukin-9 regulation of target genes	2022-02-26	0.0107299	0.148156	13.9041	63.051	PIM1;CCL2	bioplanet	6
01:27:00	Actin cytoskeleton regulation	5/226	0.0121642	0.161739	3.83406	16.9054	ITGAM;ITGB2;ITGAX;PDGFA;SSH3	bioplanet	6
01:28:00	ADP-ribosylation factor	2029-02-01	0.0132471	0.169847	12.3573	53.4326	CYTH4;ARAP2	bioplanet	6
01:29:00	Activation of kainate receptors upon glutamate binding	1930-02-01	0.0141378	0.17242	11.9154	50.7464	GNG2;NCALD	bioplanet	6
01:30:00	Integrin cell surface interactions	1985-03-01	0.0148887	0.17242	6.13797	25.8234	ITGAM;ITGB2;ITGAX	bioplanet	6
01:31:00	NOD signaling pathway	1985-03-01	0.0148887	0.17242	6.13797	25.8234	CCL2;MEFV;TNF	bioplanet	6
01:32:00	Hematopoietic cell lineage	1988-03-01	0.0163279	0.183179	5.92044	24.3619	ITGAM;TNF;CD22	bioplanet	6
01:33:00	Monoamine transport	1934-02-01	0.0179492	0.189372	10.4238	41.906	TNF;STX1A	bioplanet	6
01:34:00	Cytokines and inflammatory response	1935-02-01	0.0189626	0.189372	10.1075	40.079	PDGFA;TNF	bioplanet	6
01:35:00	fMLP induced chemokine gene expression in HMC-1 cells	1935-02-01	0.0189626	0.189372	10.1075	40.079	NCF1;NCF1C	bioplanet	6
01:36:00	Cell surface interactions at the vascular wall	1994-03-01	0.0194333	0.189372	5.5284	21.7861	ITGAM;ITGB2;ITGAX	bioplanet	6
01:37:00	GM-CSF-mediated signaling events	1936-02-01	0.0199997	0.189372	9.80969	38.3759	PIM1;CCL2	bioplanet	6
01:38:00	Signal transduction	12/1020	0.0207103	0.189372	2.06105	7.99096	ARHGAP9;LFNG;MEF2C;ITGAM;GNG2;GPR68;ITGB2;ITGAX;ARAP2;CCL2;ADRB1;FFAR2	bioplanet	6
01:39:00	Allograft rejection	1937-02-01	0.02106	0.189372	9.52893	36.7853	CD86;TNF	bioplanet	6
01:40:00	TSH regulation of gene expression	1997-03-01	0.0211	0.189372	5.35115	20.6473	MEF2C;EMP1;CCL2	bioplanet	6
01:41:00	Signaling events mediated by HDAC class II	1938-02-01	0.0221432	0.193888	9.26377	35.297	MEF2C;GNG2	bioplanet	6
01:42:00	Integrin-mediated cell adhesion	3/100	0.0228427	0.194026	5.18487	19.5943	ITGAM;ITGB2;ITGAX	bioplanet	6
01:43:00	Interleukin-4 regulation of apoptosis	5/267	0.0232399	0.194026	3.22733	12.1408	CD86;ITGAM;GAS1;CCL2;TNF	bioplanet	6
01:44:00	Chagas disease	3/104	0.0252848	0.199691	4.97852	18.3088	IFNGR2;CCL2;TNF	bioplanet	6
01:45:00	Graft-versus-host disease	1941-02-01	0.0255276	0.199691	8.54988	31.3609	CD86;TNF	bioplanet	6
01:46:00	Amoebiasis	3/105	0.0259165	0.199691	4.92946	18.0067	ITGAM;ITGB2;TNF	bioplanet	6
01:47:00	TWEAK signaling pathway	1942-02-01	0.0266996	0.199691	8.33571	30.2012	TNFRSF12A;CCL2	bioplanet	6
01:48:00	Urokinase-type plasminogen activator (uPA) and uPAR-mediated signaling	1942-02-01	0.0266996	0.199691	8.33571	30.2012	ITGAM;ITGB2	bioplanet	6
01:49:00	Type 1 diabetes mellitus	1943-02-01	0.0278931	0.204359	8.13199	29.1075	CD86;TNF	bioplanet	6
01:50:00	Blockade of neurotransmitter release by botulinum toxin	2022-01-05	0.029889	0.213591	41.4062	145.347	STX1A	bioplanet	6
01:51:00	Interleukin-12/STAT4 pathway	1945-02-01	0.030343	0.213591	7.75298	27.0981	CD86;IL18RAP	bioplanet	6
01:52:00	Leukocyte transendothelial migration	3/117	0.0341529	0.217588	4.40789	14.885	ITGAM;NCF1;ITGB2	bioplanet	6
01:53:00	Angiopoietin receptor Tie2-mediated signaling	1949-02-01	0.0354871	0.217588	7.09172	23.6763	BMX;TNF	bioplanet	6
01:54:00	Ceramide signaling pathway	1949-02-01	0.0354871	0.217588	7.09172	23.6763	PDGFA;TNF	bioplanet	6
01:55:00	ADP signalling through P2Y purinoceptor 1	2022-01-06	0.0357596	0.217588	33.1233	110.332	GNG2	bioplanet	6
01:56:00	G beta-gamma signaling through PI3K gamma	2022-01-06	0.0357596	0.217588	33.1233	110.332	GNG2	bioplanet	6
01:57:00	Low-density lipoprotein (LDL) pathway during atherogenesis	2022-01-06	0.0357596	0.217588	33.1233	110.332	CCL2	bioplanet	6
01:58:00	PDGF genes and receptors	2022-01-06	0.0357596	0.217588	33.1233	110.332	PDGFA	bioplanet	6
01:59:00	Fas signaling pathway in hepatocytes	2022-01-06	0.0357596	0.217588	33.1233	110.332	NCF1	bioplanet	6
0.0833333	Vitamin B12 metabolism	1952-02-01	0.0395499	0.23664	6.66521	21.5299	CCL2;TNF	bioplanet	6
0.0840278	Thrombin signaling through protease-activated receptors	1953-02-01	0.0409417	0.240952	6.53419	20.8807	GNG2;CYTH4	bioplanet	6
02:01:00	RUNX1 CHEA	20/1294	9.47388e-05	0.00776858	2.8918	26.7908	PRR5;ARHGAP9;ZCCHC24;LRRC25;GPR68;CD300A;INSIG1;ITGB2;AEBP1;GLI1;PPP1R18;ADAMTS10;IL18RAP;CYTH4;PIM1;E2F2;FFAR2;ATP13A2;HCST;RNF166	encode_chea	6
03:01:00	positive regulation of cardiac muscle cell proliferation (GO:0060045)	2022-03-14	7.48874e-05	0.0562127	45.9199	436.217	MEF2C;PIM1;GLI1	gobp	6
03:02:00	positive regulation of cardiac muscle tissue growth (GO:0055023)	2022-03-17	0.000138057	0.0562127	36.0745	320.624	MEF2C;PIM1;GLI1	gobp	6
03:03:00	regulation of cardiac muscle cell proliferation (GO:0060043)	2022-03-21	0.000265295	0.0562127	28.0523	231.001	MEF2C;PIM1;GLI1	gobp	6
03:04:00	microglial cell activation (GO:0001774)	2022-03-22	0.000305831	0.0562127	26.5745	215.053	ITGAM;ITGB2;TNF	gobp	6
03:05:00	regulation of MAP kinase activity (GO:0043405)	1997-05-01	0.000308382	0.0562127	9.27052	74.9445	CD300A;PDGFA;SPRY2;TNF;TRIB2	gobp	6
03:06:00	negative regulation of vascular endothelial cell proliferation (GO:1905563)	2022-02-05	0.000358706	0.0562127	111.35	883.341	MEF2C;CCL2	gobp	6
03:07:00	regulation of neutrophil degranulation (GO:0043313)	2022-02-05	0.000358706	0.0562127	111.35	883.341	ITGAM;ITGB2	gobp	6
03:08:00	cytokine-mediated signaling pathway (GO:0019221)	12/621	0.000388009	0.0562127	3.48353	27.3613	CD86;RALA;IL18RAP;ITGAM;TNFRSF12A;IFNGR2;ITGB2;PIM1;ITGAX;CCL2;TNF;STX1A	gobp	6
03:09:00	regulation of phosphatidylinositol 3-kinase signaling (GO:0014066)	5/106	0.000464436	0.0584918	8.44059	64.7789	SLC9A3R1;NCF1;PDGFA;TNF;HCST	gobp	6
03:10:00	negative regulation of B cell receptor signaling pathway (GO:0050859)	2022-02-06	0.000535929	0.0584918	83.5084	628.944	CD300A;CD22	gobp	6
03:11:00	regulation of protein transport (GO:0051223)	2022-03-28	0.000633597	0.0584918	20.1905	148.685	DNAJC1;ATP13A2;TNF	gobp	6
03:12:00	cellular response to cytokine stimulus (GO:0071345)	10/482	0.000701179	0.0584918	3.70419	26.9026	CD86;ITGAM;IFNGR2;ITGB2;PIM1;ITGAX;CCL2;TNF;IRGM;STX1A	gobp	6
03:13:00	cellular ion homeostasis (GO:0006873)	2022-02-07	0.000747331	0.0584918	66.8034	480.918	SLC12A5;ATP13A2	gobp	6
03:14:00	regulation of dopamine metabolic process (GO:0042053)	2022-02-07	0.000747331	0.0584918	66.8034	480.918	ITGAM;ITGB2	gobp	6
03:15:00	cellular response to oxygen-containing compound (GO:1901701)	8/323	0.000786737	0.0584918	4.39702	31.4282	CD86;MEF2C;GNG2;NCF1;INSIG1;CCL2;FFAR2;IRGM	gobp	6
03:16:00	cellular response to lipopolysaccharide (GO:0071222)	5/120	0.000816738	0.0584918	7.4078	52.6709	CD86;MEF2C;CCL2;TNF;IRGM	gobp	6
03:17:00	positive regulation of leukocyte cell-cell adhesion (GO:1903039)	2022-03-31	0.000857947	0.0584918	18.0245	127.271	ITGB2;CCL2;TNF	gobp	6
03:18:00	positive regulation of isomerase activity (GO:0010912)	2022-02-08	0.0009925	0.063906	55.6667	384.951	ITGAM;ITGB2	gobp	6
03:19:00	positive regulation of phosphatidylinositol 3-kinase signaling (GO:0014068)	1977-04-01	0.00122713	0.070232	9.27573	62.1759	NCF1;PDGFA;TNF;HCST	gobp	6
03:20:00	negative regulation of production of molecular mediator of immune response (GO:0002701)	2022-02-09	0.00127102	0.070232	47.7119	318.14	TNF;CD22	gobp	6
03:21:00	regulation of osteoclast differentiation (GO:0045670)	1936-03-01	0.00133313	0.070232	15.2897	101.221	MAFB;UBASH3B;TNF	gobp	6
03:22:00	macrophage activation (GO:0042116)	1936-03-01	0.00133313	0.070232	15.2897	101.221	ITGAM;ITGB2;TNF	gobp	6
03:23:00	chloride ion homeostasis (GO:0055064)	2022-02-10	0.0015825	0.0764216	41.7458	269.208	SLC12A5;SLC12A6	gobp	6
03:24:00	monovalent inorganic anion homeostasis (GO:0055083)	2022-02-10	0.0015825	0.0764216	41.7458	269.208	SLC12A5;SLC12A6	gobp	6
03:25:00	regulation of neuron death (GO:1901214)	1986-04-01	0.00184697	0.0856257	8.25391	51.9518	MEF2C;ITGAM;ITGB2;ATP13A2	gobp	6
03:26:00	cellular response to lipid (GO:0071396)	6/219	0.00217588	0.0942965	4.81715	29.5307	CD86;MEF2C;INSIG1;CCL2;FFAR2;IRGM	gobp	6
03:27:00	cellular response to organic cyclic compound (GO:0071407)	5/150	0.00219673	0.0942965	5.86623	35.906	MEF2C;GNG2;INSIG1;CCL2;TNF	gobp	6
03:28:00	positive regulation of myeloid leukocyte mediated immunity (GO:0002888)	2022-02-12	0.0023027	0.0953153	33.3933	202.82	ITGAM;ITGB2	gobp	6
03:29:00	metal ion homeostasis (GO:0055065)	1944-03-01	0.00238745	0.0954156	12.3014	74.2699	SLC12A5;TMTC2;SLC12A6	gobp	6
03:30:00	regulation of leukocyte adhesion to vascular endothelial cell (GO:1904994)	2022-02-13	0.00271063	0.0982449	30.356	179.421	ITGB2;TNF	gobp	6
03:31:00	regulation of B cell proliferation (GO:0030888)	1946-03-01	0.00271254	0.0982449	11.728	69.3111	MEF2C;CD300A;CD22	gobp	6
03:32:00	regulation of synaptic transmission, glutamatergic (GO:0051966)	1946-03-01	0.00271254	0.0982449	11.728	69.3111	MEF2C;CCL2;TNF	gobp	6
03:33:00	positive regulation of neuron death (GO:1901216)	1947-03-01	0.00288481	0.101318	11.4609	67.0267	ITGAM;ITGB2;TNF	gobp	6
03:34:00	positive regulation of leukocyte degranulation (GO:0043302)	2022-02-14	0.00314992	0.10141	27.8249	160.282	ITGAM;ITGB2	gobp	6
03:35:00	positive regulation of protein-containing complex disassembly (GO:0043243)	2022-02-14	0.00314992	0.10141	27.8249	160.282	TNF;IRGM	gobp	6
03:36:00	positive regulation of superoxide anion generation (GO:0032930)	2022-02-14	0.00314992	0.10141	27.8249	160.282	ITGAM;ITGB2	gobp	6
03:37:00	positive regulation of acute inflammatory response (GO:0002675)	2022-02-15	0.00362019	0.110416	25.6833	144.371	FFAR2;TNF	gobp	6
03:38:00	regulation of superoxide anion generation (GO:0032928)	2022-02-15	0.00362019	0.110416	25.6833	144.371	ITGAM;ITGB2	gobp	6
03:39:00	positive regulation of leukocyte adhesion to vascular endothelial cell (GO:1904996)	2022-02-16	0.00412105	0.122469	23.8475	130.962	ITGB2;TNF	gobp	6
03:40:00	regulation of protein kinase activity (GO:0045859)	4/110	0.00449438	0.130225	6.37736	34.4692	SLC9A3R1;UBASH3B;TNF;TRIB2	gobp	6
03:41:00	regulation of vascular endothelial cell proliferation (GO:1905562)	2022-02-18	0.00521301	0.144552	20.8645	109.676	MEF2C;CCL2	gobp	6
03:42:00	cellular response to molecule of bacterial origin (GO:0071219)	4/115	0.00525942	0.144552	6.08855	31.9511	CD86;MEF2C;CCL2;IRGM	gobp	6
03:43:00	positive regulation of apoptotic signaling pathway (GO:2001235)	1959-03-01	0.00548774	0.144552	8.99955	46.8448	SLC9A3R1;TNFRSF12A;TNF	gobp	6
03:44:00	regulation of secretion by cell (GO:1903530)	1959-03-01	0.00548774	0.144552	8.99955	46.8448	MEF2C;DNAJC1;RALA	gobp	6
03:45:00	positive regulation of interleukin-8 production (GO:0032757)	1961-03-01	0.00602251	0.155113	8.68834	44.417	FFAR2;LILRA2;TNF	gobp	6
03:46:00	lipopolysaccharide-mediated signaling pathway (GO:0031663)	2022-02-20	0.00642281	0.158384	18.5444	93.61	CCL2;TNF	gobp	6
03:47:00	toll-like receptor 4 signaling pathway (GO:0034142)	2022-02-20	0.00642281	0.158384	18.5444	93.61	ITGAM;ITGB2	gobp	6
03:48:00	regulation of protein secretion (GO:0050708)	4/125	0.00704136	0.165107	5.58254	27.6668	DNAJC1;ATP13A2;TNF;STX1A	gobp	6
03:49:00	positive regulation of phosphatase activity (GO:0010922)	2022-02-21	0.00707098	0.165107	17.5674	86.9897	MEF2C;CD300A	gobp	6
03:50:00	regulation of signal transduction (GO:0009966)	5/198	0.00712282	0.165107	4.39655	21.7385	LFNG;UBASH3B;CASTOR2;GAS1;GLI1	gobp	6
03:51:00	positive regulation of cell death (GO:0010942)	1966-03-01	0.00749213	0.170262	7.99677	39.1354	ITGAM;ITGB2;TNF	gobp	6
03:52:00	negative regulation of B cell activation (GO:0050869)	2022-02-22	0.00774749	0.171684	16.6882	81.1113	CD300A;SAMSN1	gobp	6
03:53:00	regulation of myeloid cell differentiation (GO:0045637)	1968-03-01	0.00813408	0.171684	7.74993	37.2903	MEF2C;MAFB;KMT2C	gobp	6
03:54:00	positive regulation of cell population proliferation (GO:0008284)	8/474	0.00821238	0.171684	2.9493	14.1629	CD86;MEF2C;PIM1;ITGAX;PDGFA;TOX;GLI1;TNF	gobp	6
03:55:00	regulation of B cell receptor signaling pathway (GO:0050855)	2022-02-23	0.008452	0.171684	15.8928	75.8617	CD300A;CD22	gobp	6
03:56:00	regulation of interferon-gamma-mediated signaling pathway (GO:0060334)	2022-02-23	0.008452	0.171684	15.8928	75.8617	IFNGR2;IRGM	gobp	6
03:57:00	regulation of protein kinase B signaling (GO:0051896)	5/207	0.00854331	0.171684	4.19875	19.997	CD86;SLC9A3R1;PDGFA;SPRY2;TNF	gobp	6
03:58:00	regulation of cytokine production involved in immune response (GO:0002718)	2022-02-24	0.00918415	0.171684	15.1696	71.1496	FFAR2;TNF	gobp	6
03:59:00	positive regulation of neuron apoptotic process (GO:0043525)	2022-02-24	0.00918415	0.171684	15.1696	71.1496	ITGAM;TNF	gobp	6
0.166667	positive regulation of protein targeting to membrane (GO:0090314)	2022-02-24	0.00918415	0.171684	15.1696	71.1496	ITGAM;ITGB2	gobp	6
0.167361	potassium ion homeostasis (GO:0055075)	2022-02-24	0.00918415	0.171684	15.1696	71.1496	SLC12A5;SLC12A6	gobp	6
0.168056	protein kinase B signaling (GO:0043491)	2022-02-24	0.00918415	0.171684	15.1696	71.1496	CCL2;TNF	gobp	6
0.16875	negative regulation of antigen receptor-mediated signaling pathway (GO:0050858)	2022-02-25	0.00994358	0.178859	14.5093	66.9	CD300A;CD22	gobp	6
0.169444	divalent inorganic cation homeostasis (GO:0072507)	2022-02-25	0.00994358	0.178859	14.5093	66.9	TMTC2;ATP13A2	gobp	6
0.170139	extracellular structure organization (GO:0043062)	5/216	0.0101492	0.178859	4.01781	18.4432	ITGAM;ITGB2;ITGAX;PDGFA;ADAMTS10	gobp	6
0.170833	regulation of peptide hormone secretion (GO:0090276)	1974-03-01	0.0102499	0.178859	7.09286	32.4888	FFAR2;TNF;STX1A	gobp	6
0.171528	external encapsulating structure organization (GO:0045229)	5/217	0.0103396	0.178859	3.99866	18.281	ITGAM;ITGB2;ITGAX;PDGFA;ADAMTS10	gobp	6
0.172222	regulation of synapse organization (GO:0050807)	2022-02-26	0.0107299	0.182882	13.9041	63.051	MEF2C;TNF	gobp	6
0.172917	monovalent inorganic cation homeostasis (GO:0055067)	2022-02-27	0.0115429	0.193887	13.3472	59.5511	SLC12A5;SLC12A6	gobp	6
0.173611	regulation of B cell activation (GO:0050864)	2022-02-28	0.0123821	0.200036	12.8332	56.3572	SAMSN1;CD22	gobp	6
0.174306	regulation of immunoglobulin production (GO:0002637)	2022-02-28	0.0123821	0.200036	12.8332	56.3572	CD86;CD22	gobp	6
0.175	inflammatory response (GO:0006954)	5/230	0.0130412	0.200036	3.76513	16.3393	GPR68;ITGB2;CCL2;MEFV;TNF	gobp	6
0.175694	regulation of interleukin-8 production (GO:0032677)	1981-03-01	0.0130864	0.200036	6.45404	27.9859	FFAR2;LILRA2;TNF	gobp	6
0.176389	regulation of protein targeting to membrane (GO:0090313)	2029-02-01	0.0132471	0.200036	12.3573	53.4326	ITGAM;ITGB2	gobp	6
0.177083	positive regulation of extrinsic apoptotic signaling pathway (GO:2001238)	2029-02-01	0.0132471	0.200036	12.3573	53.4326	TNFRSF12A;TNF	gobp	6
0.177778	negative regulation of protein phosphorylation (GO:0001933)	4/152	0.0137215	0.200036	4.55787	19.5477	UBASH3B;SPRY2;TRIB2;SAMSN1	gobp	6
0.178472	regulation of interleukin-1 beta production (GO:0032651)	1983-03-01	0.0139709	0.200036	6.29206	26.872	MEFV;LILRA2;TNF	gobp	6
0.179167	plasma membrane invagination (GO:0099024)	1930-02-01	0.0141378	0.200036	11.9154	50.7464	ITGAM;ITGB2	gobp	6
0.179861	heterotypic cell-cell adhesion (GO:0034113)	1930-02-01	0.0141378	0.200036	11.9154	50.7464	ITGB2;ITGAX	gobp	6
0.180556	B cell activation (GO:0042113)	1985-03-01	0.0148887	0.200036	6.13797	25.8234	CD86;MEF2C;CD22	gobp	6
0.18125	regulation of ERK1 and ERK2 cascade (GO:0070372)	5/238	0.0149216	0.200036	3.63438	15.2824	SLC9A3R1;PDGFA;CCL2;SPRY2;TNF	gobp	6
0.181944	regulation of cellular component size (GO:0032535)	1931-02-01	0.0150536	0.200036	11.5039	48.272	SLC9A3R1;ATP13A2	gobp	6
0.182639	negative regulation of peptidyl-tyrosine phosphorylation (GO:0050732)	1931-02-01	0.0150536	0.200036	11.5039	48.272	CD300A;SAMSN1	gobp	6
0.183333	cellular response to growth factor stimulus (GO:0071363)	4/158	0.0156103	0.200036	4.37895	18.2157	MEF2C;GAS1;CCL2;SPRY2	gobp	6
0.184028	negative regulation of angiogenesis (GO:0016525)	1987-03-01	0.0158398	0.200036	5.99122	24.835	E2F2;SPRY2;TNF	gobp	6
0.184722	response to lipopolysaccharide (GO:0032496)	4/159	0.0159401	0.200036	4.35048	18.0063	CD86;MEF2C;CCL2;IRGM	gobp	6
0.185417	regulation of NMDA receptor activity (GO:2000310)	1932-02-01	0.0159944	0.200036	11.1199	45.9865	MEF2C;CCL2	gobp	6
0.186111	positive regulation of protein kinase B signaling (GO:0051897)	4/161	0.016613	0.200036	4.29463	17.5975	CD86;PDGFA;SPRY2;TNF	gobp	6
0.186806	negative regulation of blood vessel endothelial cell migration (GO:0043537)	1934-02-01	0.0179492	0.200036	10.4238	41.906	MEF2C;TNF	gobp	6
0.1875	B cell receptor signaling pathway (GO:0050853)	1934-02-01	0.0179492	0.200036	10.4238	41.906	MEF2C;BMX	gobp	6
0.188194	cellular response to vascular endothelial growth factor stimulus (GO:0035924)	1934-02-01	0.0179492	0.200036	10.4238	41.906	GAS1;SPRY2	gobp	6
0.188889	regulation of peptidyl-tyrosine phosphorylation (GO:0050730)	1992-03-01	0.0183645	0.200036	5.65321	22.5978	ITGB2;PDGFA;SAMSN1	gobp	6
0.189583	positive regulation of peptidyl-serine phosphorylation (GO:0033138)	1993-03-01	0.0188947	0.200036	5.59011	22.1865	SPRY2;TNF;IRGM	gobp	6
0.190278	negative regulation of MAPK cascade (GO:0043409)	1994-03-01	0.0194333	0.200036	5.5284	21.7861	SLC9A3R1;CD300A;SPRY2	gobp	6
0.190972	negative regulation of fat cell differentiation (GO:0045599)	1936-02-01	0.0199997	0.200036	9.80969	38.3759	TNF;TRIB2	gobp	6
0.191667	negative regulation of toll-like receptor signaling pathway (GO:0034122)	1936-02-01	0.0199997	0.200036	9.80969	38.3759	CD300A;LILRA2	gobp	6
0.192361	regulation of vesicle-mediated transport (GO:0060627)	1996-03-01	0.020536	0.200036	5.40897	21.017	RALA;GAS1;CD22	gobp	6
0.193056	positive regulation of ERK1 and ERK2 cascade (GO:0070374)	4/172	0.0206314	0.200036	4.01119	15.5672	PDGFA;CCL2;SPRY2;TNF	gobp	6
0.19375	negative regulation of endothelial cell proliferation (GO:0001937)	1937-02-01	0.02106	0.200036	9.52893	36.7853	MEF2C;CCL2	gobp	6
0.194444	phagocytosis, engulfment (GO:0006911)	1937-02-01	0.02106	0.200036	9.52893	36.7853	ITGAM;ITGB2	gobp	6
0.195139	positive regulation of calcium ion transport (GO:0051928)	1937-02-01	0.02106	0.200036	9.52893	36.7853	CCL2;LILRA2	gobp	6
0.195833	positive regulation of signaling receptor activity (GO:2000273)	1937-02-01	0.02106	0.200036	9.52893	36.7853	NCF1;CCL2	gobp	6
0.196528	negative regulation of neuron death (GO:1901215)	1998-03-01	0.0216724	0.200036	5.29456	20.2872	MEF2C;CCL2;ATP13A2	gobp	6
0.197222	regulation of neuron apoptotic process (GO:0043523)	1998-03-01	0.0216724	0.200036	5.29456	20.2872	MEF2C;CCL2;TNF	gobp	6
0.197917	regulation of peptidyl-serine phosphorylation (GO:0033135)	1998-03-01	0.0216724	0.200036	5.29456	20.2872	SPRY2;TNF;IRGM	gobp	6
0.198611	negative regulation of endothelial cell migration (GO:0010596)	1938-02-01	0.0221432	0.200036	9.26377	35.297	MEF2C;TNF	gobp	6
0.199306	positive regulation of production of molecular mediator of immune response (GO:0002702)	1938-02-01	0.0221432	0.200036	9.26377	35.297	CD86;FFAR2	gobp	6
0.2	regulation of protein phosphorylation (GO:0001932)	5/266	0.022912	0.200036	3.23986	12.234	SLC9A3R1;ITGB2;PDGFA;TNF;IRGM	gobp	6
0.200694	negative regulation of immune response (GO:0050777)	4/178	0.0230543	0.200036	3.8717	14.5959	GNG2;CD300A;ADRB1;SAMSN1	gobp	6
0.201389	negative regulation of signal transduction (GO:0009968)	5/267	0.0232399	0.200036	3.22733	12.1408	SLC9A3R1;UBASH3B;SPRY2;LILRA2;TNF	gobp	6
0.202083	negative regulation of lymphocyte proliferation (GO:0050672)	1939-02-01	0.0232491	0.200036	9.01295	33.9021	CD86;CD300A	gobp	6
0.202778	regulation of intracellular transport (GO:0032386)	1939-02-01	0.0232491	0.200036	9.01295	33.9021	GAS1;ATP13A2	gobp	6
0.203472	regulation of peptidyl-threonine phosphorylation (GO:0010799)	1939-02-01	0.0232491	0.200036	9.01295	33.9021	SPRY2;IRGM	gobp	6
0.204167	positive regulation of protein localization to membrane (GO:1905477)	3/101	0.0234406	0.200036	5.1317	19.2608	ITGAM;ITGB2;TNF	gobp	6
0.204861	regulation of immune response (GO:0050776)	4/179	0.0234743	0.200036	3.84938	14.4423	CD300A;ITGB2;HCST;CD22	gobp	6
0.205556	digestive tract development (GO:0048565)	1940-02-01	0.0243774	0.200036	8.77532	32.5924	GLI1;TNF	gobp	6
0.20625	negative regulation of cytokine production (GO:0001818)	4/182	0.024762	0.200036	3.78392	13.9946	MEFV;TNF;TRIB2;LGALS9B	gobp	6
0.206944	positive regulation of protein serine/threonine kinase activity (GO:0071902)	3/106	0.0265566	0.200036	4.88136	17.7119	PDGFA;TNF;IRGM	gobp	6
0.207639	regulation of chemokine production (GO:0032642)	1942-02-01	0.0266996	0.200036	8.33571	30.2012	FFAR2;TNF	gobp	6
0.208333	potassium ion import across plasma membrane (GO:1990573)	1942-02-01	0.0266996	0.200036	8.33571	30.2012	SLC12A5;SLC12A6	gobp	6
0.209028	regulation of cytokine production involved in inflammatory response (GO:1900015)	1943-02-01	0.0278931	0.200036	8.13199	29.1075	MEFV;TNF	gobp	6
0.209722	negative regulation of proteolysis (GO:0045861)	1943-02-01	0.0278931	0.200036	8.13199	29.1075	DNAJC1;GAS1	gobp	6
0.210417	neutrophil activation involved in immune response (GO:0002283)	7/485	0.028121	0.200036	2.49224	8.90038	ARHGAP9;MGAM;ITGAM;CD300A;ITGB2;ITGAX;LILRA2	gobp	6
0.211111	regulation of endothelial cell apoptotic process (GO:2000351)	1944-02-01	0.0291076	0.200036	7.93798	28.0747	CCL2;TNF	gobp	6
0.211806	positive regulation of macromolecule metabolic process (GO:0010604)	6/384	0.0293781	0.200036	2.69165	9.49481	MEF2C;ITGAX;SPRY2;ATP13A2;TNF;LGALS9B	gobp	6
0.2125	activation of protein kinase C activity (GO:1990051)	2022-01-05	0.029889	0.200036	41.4062	145.347	CD86	gobp	6
0.213194	negative regulation of immunoglobulin production (GO:0002638)	2022-01-05	0.029889	0.200036	41.4062	145.347	CD22	gobp	6
0.213889	bile acid secretion (GO:0032782)	2022-01-05	0.029889	0.200036	41.4062	145.347	SLC9A3R1	gobp	6
0.214583	C-terminal protein lipidation (GO:0006501)	2022-01-05	0.029889	0.200036	41.4062	145.347	IRGM	gobp	6
0.215278	negative regulation of mast cell activation involved in immune response (GO:0033007)	2022-01-05	0.029889	0.200036	41.4062	145.347	CD300A	gobp	6
0.215972	negative regulation of myosin-light-chain-phosphatase activity (GO:0035509)	2022-01-05	0.029889	0.200036	41.4062	145.347	TNF	gobp	6
0.216667	regulation of circadian sleep/wake cycle (GO:0042749)	2022-01-05	0.029889	0.200036	41.4062	145.347	ADRB1	gobp	6
0.217361	regulation of endothelial tube morphogenesis (GO:1901509)	2022-01-05	0.029889	0.200036	41.4062	145.347	ITGAX	gobp	6
0.218056	cellular response to antibiotic (GO:0071236)	2022-01-05	0.029889	0.200036	41.4062	145.347	MEF2C	gobp	6
0.21875	regulation of fever generation (GO:0031620)	2022-01-05	0.029889	0.200036	41.4062	145.347	TNF	gobp	6
0.219444	regulation of germinal center formation (GO:0002634)	2022-01-05	0.029889	0.200036	41.4062	145.347	MEF2C	gobp	6
0.220139	regulation of glomerular mesangial cell proliferation (GO:0072124)	2022-01-05	0.029889	0.200036	41.4062	145.347	PDGFA	gobp	6
0.220833	cellular response to nicotine (GO:0071316)	2022-01-05	0.029889	0.200036	41.4062	145.347	TNF	gobp	6
0.221528	regulation of granulocyte colony-stimulating factor production (GO:0071655)	2022-01-05	0.029889	0.200036	41.4062	145.347	LILRA2	gobp	6
0.222222	regulation of hippocampal neuron apoptotic process (GO:0110089)	2022-01-05	0.029889	0.200036	41.4062	145.347	ITGAM	gobp	6
0.222917	cellular response to salt stress (GO:0071472)	2022-01-05	0.029889	0.200036	41.4062	145.347	SLC12A6	gobp	6
0.223611	cellular response to vitamin D (GO:0071305)	2022-01-05	0.029889	0.200036	41.4062	145.347	PIM1	gobp	6
0.224306	cerebral cortex neuron differentiation (GO:0021895)	2022-01-05	0.029889	0.200036	41.4062	145.347	TOX	gobp	6
0.225	chronic inflammatory response (GO:0002544)	2022-01-05	0.029889	0.200036	41.4062	145.347	TNF	gobp	6
0.225694	regulation of microglial cell mediated cytotoxicity (GO:1904149)	2022-01-05	0.029889	0.200036	41.4062	145.347	ITGAM	gobp	6
0.226389	regulation of neutrophil activation (GO:1902563)	2022-01-05	0.029889	0.200036	41.4062	145.347	CD300A	gobp	6
0.227083	phenol-containing compound metabolic process (GO:0018958)	2022-01-05	0.029889	0.200036	41.4062	145.347	SULT1B1	gobp	6
0.227778	regulation of phosphatidylinositol biosynthetic process (GO:0010511)	2022-01-05	0.029889	0.200036	41.4062	145.347	PDGFA	gobp	6
0.228472	enamel mineralization (GO:0070166)	2022-01-05	0.029889	0.200036	41.4062	145.347	FAM20C	gobp	6
0.229167	positive regulation of amine transport (GO:0051954)	2022-01-05	0.029889	0.200036	41.4062	145.347	STX1A	gobp	6
0.229861	regulation of skeletal muscle tissue development (GO:0048641)	2022-01-05	0.029889	0.200036	41.4062	145.347	MEF2C	gobp	6
0.230556	extracellular exosome biogenesis (GO:0097734)	2022-01-05	0.029889	0.200036	41.4062	145.347	ATP13A2	gobp	6
0.23125	regulation of sodium:proton antiporter activity (GO:0032415)	2022-01-05	0.029889	0.200036	41.4062	145.347	SLC9A3R1	gobp	6
0.231944	positive regulation of cell proliferation involved in heart morphogenesis (GO:2000138)	2022-01-05	0.029889	0.200036	41.4062	145.347	PIM1	gobp	6
0.232639	positive regulation of DNA demethylation (GO:1901537)	2022-01-05	0.029889	0.200036	41.4062	145.347	TOX	gobp	6
0.233333	glutathione transport (GO:0034635)	2022-01-05	0.029889	0.200036	41.4062	145.347	SLC9A3R1	gobp	6
0.234028	renal tubule development (GO:0061326)	2022-01-05	0.029889	0.200036	41.4062	145.347	MEF2C	gobp	6
0.234722	positive regulation of glial cell proliferation (GO:0060252)	2022-01-05	0.029889	0.200036	41.4062	145.347	TNF	gobp	6
0.235417	heart field specification (GO:0003128)	2022-01-05	0.029889	0.200036	41.4062	145.347	MEF2C	gobp	6
0.236111	positive regulation of heat generation (GO:0031652)	2022-01-05	0.029889	0.200036	41.4062	145.347	TNF	gobp	6
0.236806	response to salt stress (GO:0009651)	2022-01-05	0.029889	0.200036	41.4062	145.347	TNF	gobp	6
0.2375	secondary heart field specification (GO:0003139)	2022-01-05	0.029889	0.200036	41.4062	145.347	MEF2C	gobp	6
0.238194	T cell extravasation (GO:0072683)	2022-01-05	0.029889	0.200036	41.4062	145.347	CCL2	gobp	6
0.238889	ventricular cardiac muscle cell differentiation (GO:0055012)	2022-01-05	0.029889	0.200036	41.4062	145.347	MEF2C	gobp	6
0.239583	modulation by symbiont of host autophagy (GO:0075071)	2022-01-05	0.029889	0.200036	41.4062	145.347	IRGM	gobp	6
0.240278	negative regulation of adaptive immune response (GO:0002820)	2022-01-05	0.029889	0.200036	41.4062	145.347	SAMSN1	gobp	6
0.240972	protein phosphorylation (GO:0006468)	7/496	0.0312193	0.200036	2.43479	8.44075	PIM1;FAM20C;CCL2;ATP13A2;BMX;TRIB2;HCST	gobp	6
0.241667	regulation of fibroblast proliferation (GO:0048145)	1946-02-01	0.031599	0.200036	7.57639	26.1736	CD300A;PDGFA	gobp	6
0.242361	positive regulation of protein metabolic process (GO:0051247)	3/115	0.0326964	0.200036	4.48706	15.3479	CD86;LILRA2;TNF	gobp	6
0.243056	negative regulation of MAP kinase activity (GO:0043407)	1948-02-01	0.0341713	0.200036	7.24626	24.466	CD300A;SPRY2	gobp	6
0.24375	negative regulation of mitotic cell cycle (GO:0045930)	1948-02-01	0.0341713	0.200036	7.24626	24.466	SLC9A3R1;GAS1	gobp	6
0.244444	cognition (GO:0050890)	1948-02-01	0.0341713	0.200036	7.24626	24.466	SOBP;TNF	gobp	6
0.245139	phosphorylation (GO:0016310)	6/400	0.034823	0.200036	2.58023	8.66305	PIM1;FAM20C;CCL2;BMX;TRIB2;HCST	gobp	6
0.245833	adenylate cyclase-activating G protein-coupled receptor signaling pathway (GO:0007189)	3/118	0.0348937	0.200036	4.36934	14.6611	ADGRE1;GNG2;ADRB1	gobp	6
0.246528	cellular defense response (GO:0006968)	1949-02-01	0.0354871	0.200036	7.09172	23.6763	NCF1;LSP1	gobp	6
0.247222	positive regulation of reactive oxygen species metabolic process (GO:2000379)	1949-02-01	0.0354871	0.200036	7.09172	23.6763	ITGAM;ITGB2	gobp	6
0.247917	negative regulation of erythrocyte differentiation (GO:0045647)	2022-01-06	0.0357596	0.200036	33.1233	110.332	MAFB	gobp	6
0.248611	negative regulation of lens fiber cell differentiation (GO:1902747)	2022-01-06	0.0357596	0.200036	33.1233	110.332	SPRY2	gobp	6
0.249306	negative regulation of mast cell activation (GO:0033004)	2022-01-06	0.0357596	0.200036	33.1233	110.332	CD300A	gobp	6
0.25	negative regulation of morphogenesis of an epithelium (GO:1905331)	2022-01-06	0.0357596	0.200036	33.1233	110.332	TNF	gobp	6
0.250694	cardiac ventricle formation (GO:0003211)	2022-01-06	0.0357596	0.200036	33.1233	110.332	MEF2C	gobp	6
0.251389	negative regulation of myeloid leukocyte mediated immunity (GO:0002887)	2022-01-06	0.0357596	0.200036	33.1233	110.332	CD300A	gobp	6
0.252083	regulation of collagen fibril organization (GO:1904026)	2022-01-06	0.0357596	0.200036	33.1233	110.332	AEBP1	gobp	6
0.252778	regulation of DNA demethylation (GO:1901535)	2022-01-06	0.0357596	0.200036	33.1233	110.332	TOX	gobp	6
0.253472	nephron tubule development (GO:0072080)	2022-01-06	0.0357596	0.200036	33.1233	110.332	MEF2C	gobp	6
0.254167	regulation of macrophage apoptotic process (GO:2000109)	2022-01-06	0.0357596	0.200036	33.1233	110.332	MEF2C	gobp	6
0.254861	regulation of NK T cell activation (GO:0051133)	2022-01-06	0.0357596	0.200036	33.1233	110.332	CD300A	gobp	6
0.255556	positive regulation of autophagosome maturation (GO:1901098)	2022-01-06	0.0357596	0.200036	33.1233	110.332	IRGM	gobp	6
0.25625	gamma-aminobutyric acid transport (GO:0015812)	2022-01-06	0.0357596	0.200036	33.1233	110.332	SLC9A3R1	gobp	6
0.256944	regulation of vitamin D biosynthetic process (GO:0060556)	2022-01-06	0.0357596	0.200036	33.1233	110.332	TNF	gobp	6
0.257639	positive regulation of fever generation (GO:0031622)	2022-01-06	0.0357596	0.200036	33.1233	110.332	TNF	gobp	6
0.258333	response to catecholamine (GO:0071869)	2022-01-06	0.0357596	0.200036	33.1233	110.332	GNG2	gobp	6
0.259028	positive regulation of heart rate by epinephrine-norepinephrine (GO:0001996)	2022-01-06	0.0357596	0.200036	33.1233	110.332	ADRB1	gobp	6
0.259722	positive regulation of I-kappaB phosphorylation (GO:1903721)	2022-01-06	0.0357596	0.200036	33.1233	110.332	TNF	gobp	6
0.260417	response to manganese ion (GO:0010042)	2022-01-06	0.0357596	0.200036	33.1233	110.332	ATP13A2	gobp	6
0.261111	leukocyte chemotaxis involved in inflammatory response (GO:0002232)	2022-01-06	0.0357596	0.200036	33.1233	110.332	FFAR2	gobp	6
0.261806	TORC2 signaling (GO:0038203)	2022-01-06	0.0357596	0.200036	33.1233	110.332	PRR5	gobp	6
0.2625	positive regulation of T-helper 2 cell differentiation (GO:0045630)	2022-01-06	0.0357596	0.200036	33.1233	110.332	CD86	gobp	6
0.263194	vacuole organization (GO:0007033)	2022-01-06	0.0357596	0.200036	33.1233	110.332	ATP13A2	gobp	6
0.263889	extracellular matrix organization (GO:0030198)	5/300	0.0358074	0.200036	2.86148	9.5276	ITGAM;ITGB2;ITGAX;PDGFA;ADAMTS10	gobp	6
0.264583	negative regulation of ERK1 and ERK2 cascade (GO:0070373)	1950-02-01	0.0368224	0.200036	6.94363	22.9254	SLC9A3R1;SPRY2	gobp	6
0.265278	chloride transmembrane transport (GO:1902476)	1950-02-01	0.0368224	0.200036	6.94363	22.9254	SLC12A5;SLC12A6	gobp	6
0.265972	regulation of smoothened signaling pathway (GO:0008589)	1951-02-01	0.0381767	0.200036	6.80158	22.2108	GAS1;GLI1	gobp	6
0.266667	positive regulation of chemokine production (GO:0032722)	1953-02-01	0.0409417	0.200036	6.53419	20.8807	FFAR2;TNF	gobp	6
0.267361	positive regulation of NIK/NF-kappaB signaling (GO:1901224)	1953-02-01	0.0409417	0.200036	6.53419	20.8807	CD86;TNF	gobp	6
0.268056	positive regulation of phagocytosis (GO:0050766)	1953-02-01	0.0409417	0.200036	6.53419	20.8807	CCL2;TNF	gobp	6
0.26875	adenylate cyclase-activating dopamine receptor signaling pathway (GO:0007191)	2022-01-07	0.041595	0.200036	27.6014	87.7662	GNG2	gobp	6
0.269444	regulation of calcidiol 1-monooxygenase activity (GO:0060558)	2022-01-07	0.041595	0.200036	27.6014	87.7662	TNF	gobp	6
0.270139	bleb assembly (GO:0032060)	2022-01-07	0.041595	0.200036	27.6014	87.7662	EMP1	gobp	6
0.270833	negative regulation of intracellular transport (GO:0032387)	2022-01-07	0.041595	0.200036	27.6014	87.7662	INSIG1	gobp	6
0.271528	cation homeostasis (GO:0055080)	2022-01-07	0.041595	0.200036	27.6014	87.7662	ATP13A2	gobp	6
0.272222	negative regulation of NLRP3 inflammasome complex assembly (GO:1900226)	2022-01-07	0.041595	0.200036	27.6014	87.7662	MEFV	gobp	6
0.272917	cellular cation homeostasis (GO:0030003)	2022-01-07	0.041595	0.200036	27.6014	87.7662	ATP13A2	gobp	6
0.273611	cellular hypotonic response (GO:0071476)	2022-01-07	0.041595	0.200036	27.6014	87.7662	SLC12A6	gobp	6
0.274306	cellular response to interleukin-18 (GO:0071351)	2022-01-07	0.041595	0.200036	27.6014	87.7662	IL18RAP	gobp	6
0.275	regulation of glial cell apoptotic process (GO:0034350)	2022-01-07	0.041595	0.200036	27.6014	87.7662	CCL2	gobp	6
0.275694	cellular response to monoamine stimulus (GO:0071868)	2022-01-07	0.041595	0.200036	27.6014	87.7662	GNG2	gobp	6
0.276389	cellular response to prostaglandin E stimulus (GO:0071380)	2022-01-07	0.041595	0.200036	27.6014	87.7662	GNG2	gobp	6
0.277083	regulation of I-kappaB phosphorylation (GO:1903719)	2022-01-07	0.041595	0.200036	27.6014	87.7662	TNF	gobp	6
0.277778	regulation of lens fiber cell differentiation (GO:1902746)	2022-01-07	0.041595	0.200036	27.6014	87.7662	SPRY2	gobp	6
0.278472	collagen-activated tyrosine kinase receptor signaling pathway (GO:0038063)	2022-01-07	0.041595	0.200036	27.6014	87.7662	UBASH3B	gobp	6
0.279167	regulation of lysosomal protein catabolic process (GO:1905165)	2022-01-07	0.041595	0.200036	27.6014	87.7662	ATP13A2	gobp	6
0.279861	death-inducing signaling complex assembly (GO:0071550)	2022-01-07	0.041595	0.200036	27.6014	87.7662	TNF	gobp	6
0.280556	nucleotide-binding oligomerization domain containing 2 signaling pathway (GO:0070431)	2022-01-07	0.041595	0.200036	27.6014	87.7662	IRGM	gobp	6
0.28125	regulation of myosin-light-chain-phosphatase activity (GO:0035507)	2022-01-07	0.041595	0.200036	27.6014	87.7662	TNF	gobp	6
0.281944	regulation of natural killer cell chemotaxis (GO:2000501)	2022-01-07	0.041595	0.200036	27.6014	87.7662	CCL2	gobp	6
0.282639	regulation of norepinephrine secretion (GO:0014061)	2022-01-07	0.041595	0.200036	27.6014	87.7662	STX1A	gobp	6
0.283333	positive regulation by symbiont of host autophagy (GO:0075044)	2022-01-07	0.041595	0.200036	27.6014	87.7662	IRGM	gobp	6
0.284028	epithelial cell differentiation involved in kidney development (GO:0035850)	2022-01-07	0.041595	0.200036	27.6014	87.7662	MEF2C	gobp	6
0.284722	ethanol catabolic process (GO:0006068)	2022-01-07	0.041595	0.200036	27.6014	87.7662	SULT1B1	gobp	6
0.285417	positive regulation of cardiac muscle cell differentiation (GO:2000727)	2022-01-07	0.041595	0.200036	27.6014	87.7662	MEF2C	gobp	6
0.286111	positive regulation of catecholamine secretion (GO:0033605)	2022-01-07	0.041595	0.200036	27.6014	87.7662	STX1A	gobp	6
0.286806	positive regulation of chemokine (C-X-C motif) ligand 2 production (GO:2000343)	2022-01-07	0.041595	0.200036	27.6014	87.7662	TNF	gobp	6
0.2875	gland morphogenesis (GO:0022612)	2022-01-07	0.041595	0.200036	27.6014	87.7662	SLC9A3R1	gobp	6
0.288194	glial cell migration (GO:0008347)	2022-01-07	0.041595	0.200036	27.6014	87.7662	CCL2	gobp	6
0.288889	positive regulation of gliogenesis (GO:0014015)	2022-01-07	0.041595	0.200036	27.6014	87.7662	TNF	gobp	6
0.289583	hypotonic response (GO:0006971)	2022-01-07	0.041595	0.200036	27.6014	87.7662	SLC12A5	gobp	6
0.290278	interleukin-18-mediated signaling pathway (GO:0035655)	2022-01-07	0.041595	0.200036	27.6014	87.7662	IL18RAP	gobp	6
0.290972	positive regulation of podosome assembly (GO:0071803)	2022-01-07	0.041595	0.200036	27.6014	87.7662	TNF	gobp	6
0.291667	marginal zone B cell differentiation (GO:0002315)	2022-01-07	0.041595	0.200036	27.6014	87.7662	LFNG	gobp	6
0.292361	positive regulation of synaptic plasticity (GO:0031915)	2022-01-07	0.041595	0.200036	27.6014	87.7662	DBN1	gobp	6
0.293056	regulation of megakaryocyte differentiation (GO:0045652)	1954-02-01	0.0423518	0.202834	6.40821	20.2611	MEF2C;KMT2C	gobp	6
0.29375	regulation of blood vessel endothelial cell migration (GO:0043535)	1955-02-01	0.0437799	0.205735	6.28698	19.6693	MEF2C;TNF	gobp	6
0.294444	autophagosome organization (GO:1905037)	1956-02-01	0.0452258	0.205735	6.17025	19.1036	ATP13A2;IRGM	gobp	6
0.295139	positive regulation of interleukin-1 beta production (GO:0032731)	1956-02-01	0.0452258	0.205735	6.17025	19.1036	LILRA2;TNF	gobp	6
0.295833	cellular response to metal ion (GO:0071248)	3/131	0.0452717	0.205735	3.923	12.142	MEF2C;NCF1;ATP13A2	gobp	6
0.296528	negative regulation of CD4-positive, alpha-beta T cell proliferation (GO:2000562)	2022-01-08	0.0473953	0.205735	23.6571	72.1361	LGALS9B	gobp	6
0.297222	ammonium transmembrane transport (GO:0072488)	2022-01-08	0.0473953	0.205735	23.6571	72.1361	SLC12A6	gobp	6
0.297917	regulation of activation of Janus kinase activity (GO:0010533)	2022-01-08	0.0473953	0.205735	23.6571	72.1361	CD300A	gobp	6
0.298611	regulation of apoptotic cell clearance (GO:2000425)	2022-01-08	0.0473953	0.205735	23.6571	72.1361	CCL2	gobp	6
0.299306	negative regulation of glial cell apoptotic process (GO:0034351)	2022-01-08	0.0473953	0.205735	23.6571	72.1361	CCL2	gobp	6
0.3	autophagosome-lysosome fusion (GO:0061909)	2022-01-08	0.0473953	0.205735	23.6571	72.1361	ATP13A2	gobp	6
0.300694	regulation of chaperone-mediated autophagy (GO:1904714)	2022-01-08	0.0473953	0.205735	23.6571	72.1361	ATP13A2	gobp	6
0.301389	regulation of myeloid leukocyte differentiation (GO:0002761)	2022-01-08	0.0473953	0.205735	23.6571	72.1361	UBASH3B	gobp	6
0.302083	regulation of nitrogen compound metabolic process (GO:0051171)	2022-01-08	0.0473953	0.205735	23.6571	72.1361	TNF	gobp	6
0.302778	regulation of proton transport (GO:0010155)	2022-01-08	0.0473953	0.205735	23.6571	72.1361	SLC9A3R1	gobp	6
0.303472	positive regulation of apoptotic cell clearance (GO:2000427)	2022-01-08	0.0473953	0.205735	23.6571	72.1361	CCL2	gobp	6
0.304167	establishment of Golgi localization (GO:0051683)	2022-01-08	0.0473953	0.205735	23.6571	72.1361	SLC9A3R1	gobp	6
0.304861	regulation of response to wounding (GO:1903034)	2022-01-08	0.0473953	0.205735	23.6571	72.1361	TNFRSF12A	gobp	6
0.305556	regulation of T-helper 2 cell differentiation (GO:0045628)	2022-01-08	0.0473953	0.205735	23.6571	72.1361	CD86	gobp	6
0.30625	regulation of vascular wound healing (GO:0061043)	2022-01-08	0.0473953	0.205735	23.6571	72.1361	TNF	gobp	6
0.306944	histone H3-K4 monomethylation (GO:0097692)	2022-01-08	0.0473953	0.205735	23.6571	72.1361	KMT2C	gobp	6
0.307639	positive regulation of myeloid cell apoptotic process (GO:0033034)	2022-01-08	0.0473953	0.205735	23.6571	72.1361	MEF2C	gobp	6
0.308333	SREBP signaling pathway (GO:0032933)	2022-01-08	0.0473953	0.205735	23.6571	72.1361	INSIG1	gobp	6
0.309028	positive regulation of steroid biosynthetic process (GO:0010893)	2022-01-08	0.0473953	0.205735	23.6571	72.1361	TNF	gobp	6
0.309722	natural killer cell differentiation (GO:0001779)	2022-01-08	0.0473953	0.205735	23.6571	72.1361	TOX	gobp	6
0.310417	negative regulation of amyloid-beta clearance (GO:1900222)	2022-01-08	0.0473953	0.205735	23.6571	72.1361	TNF	gobp	6
0.311111	fat cell differentiation (GO:0045444)	1958-02-01	0.0481698	0.207606	5.94928	18.0443	MAFB;FFAR2	gobp	6
0.311806	positive regulation of intracellular signal transduction (GO:1902533)	7/546	0.0481847	0.207606	2.20324	6.68178	CD86;SLC9A3R1;NCF1;PDGFA;SPRY2;TNF;HCST	gobp	6
0.3125	response to organic cyclic compound (GO:0014070)	1960-02-01	0.0511818	0.21173	5.74355	17.072	CCL2;TNF	gobp	6
0.313194	regulation of cellular component organization (GO:0051128)	3/139	0.0523352	0.21173	3.69074	10.888	TNF;IRGM;CD22	gobp	6
0.313889	acid secretion (GO:0046717)	2022-01-09	0.0531609	0.21173	20.699	60.7397	SLC9A3R1	gobp	6
0.314583	negative regulation of bone resorption (GO:0045779)	2022-01-09	0.0531609	0.21173	20.699	60.7397	UBASH3B	gobp	6
0.315278	negative regulation of leukocyte degranulation (GO:0043301)	2022-01-09	0.0531609	0.21173	20.699	60.7397	CD300A	gobp	6
0.315972	negative regulation of lipid localization (GO:1905953)	2022-01-09	0.0531609	0.21173	20.699	60.7397	TNF	gobp	6
0.316667	CD40 signaling pathway (GO:0023035)	2022-01-09	0.0531609	0.21173	20.699	60.7397	CD86	gobp	6
0.317361	regulation of endothelial cell development (GO:1901550)	2022-01-09	0.0531609	0.21173	20.699	60.7397	TNF	gobp	6
0.318056	negative regulation of protein-containing complex disassembly (GO:0043242)	2022-01-09	0.0531609	0.21173	20.699	60.7397	TNF	gobp	6
0.31875	regulation of ER to Golgi vesicle-mediated transport (GO:0060628)	2022-01-09	0.0531609	0.21173	20.699	60.7397	GAS1	gobp	6
0.319444	regulation of glial cell proliferation (GO:0060251)	2022-01-09	0.0531609	0.21173	20.699	60.7397	TNF	gobp	6
0.320139	negative regulation of systemic arterial blood pressure (GO:0003085)	2022-01-09	0.0531609	0.21173	20.699	60.7397	ADRB1	gobp	6
0.320833	cellular response to sterol depletion (GO:0071501)	2022-01-09	0.0531609	0.21173	20.699	60.7397	INSIG1	gobp	6
0.321528	collagen-activated signaling pathway (GO:0038065)	2022-01-09	0.0531609	0.21173	20.699	60.7397	UBASH3B	gobp	6
0.322222	endochondral ossification (GO:0001958)	2022-01-09	0.0531609	0.21173	20.699	60.7397	MEF2C	gobp	6
0.322917	regulation of skeletal muscle cell differentiation (GO:2001014)	2022-01-09	0.0531609	0.21173	20.699	60.7397	MEF2C	gobp	6
0.323611	regulation of transmembrane transporter activity (GO:0022898)	2022-01-09	0.0531609	0.21173	20.699	60.7397	PIM1	gobp	6
0.324306	synapse pruning (GO:0098883)	2022-01-09	0.0531609	0.21173	20.699	60.7397	ITGAM	gobp	6
0.325	maintenance of apical/basal cell polarity (GO:0035090)	2022-01-09	0.0531609	0.21173	20.699	60.7397	SLC9A3R1	gobp	6
0.325694	maintenance of epithelial cell apical/basal polarity (GO:0045199)	2022-01-09	0.0531609	0.21173	20.699	60.7397	SLC9A3R1	gobp	6
0.326389	muscle cell fate commitment (GO:0042693)	2022-01-09	0.0531609	0.21173	20.699	60.7397	MEF2C	gobp	6
0.327083	negative regulation of alpha-beta T cell activation (GO:0046636)	2022-01-09	0.0531609	0.21173	20.699	60.7397	CD300A	gobp	6
0.327778	positive regulation of cellular catabolic process (GO:0031331)	3/141	0.0541797	0.213176	3.63688	10.6031	MEFV;TNF;IRGM	gobp	6
0.328472	negative regulation of kinase activity (GO:0033673)	1962-02-01	0.0542597	0.213176	5.55154	16.177	UBASH3B;TRIB2	gobp	6
0.329167	positive regulation of cysteine-type endopeptidase activity (GO:2001056)	1962-02-01	0.0542597	0.213176	5.55154	16.177	MEFV;TNF	gobp	6
0.329861	positive regulation of interleukin-1 production (GO:0032732)	1962-02-01	0.0542597	0.213176	5.55154	16.177	LILRA2;TNF	gobp	6
0.330556	regulation of extrinsic apoptotic signaling pathway (GO:2001236)	1964-02-01	0.0574014	0.215019	5.37192	15.3512	TNFRSF12A;TNF	gobp	6
0.33125	B cell homeostasis (GO:0001782)	2022-01-10	0.0588918	0.215019	18.3981	52.1045	MEF2C	gobp	6
0.331944	regulation of cell activation (GO:0050865)	2022-01-10	0.0588918	0.215019	18.3981	52.1045	LILRA2	gobp	6
0.332639	negative regulation of leukocyte migration (GO:0002686)	2022-01-10	0.0588918	0.215019	18.3981	52.1045	CD300A	gobp	6
0.333333	negative regulation of lipopolysaccharide-mediated signaling pathway (GO:0031665)	2022-01-10	0.0588918	0.215019	18.3981	52.1045	LILRA2	gobp	6
0.334028	negative regulation of phosphatidylinositol 3-kinase signaling (GO:0014067)	2022-01-10	0.0588918	0.215019	18.3981	52.1045	SLC9A3R1	gobp	6
0.334722	negative regulation of protein exit from endoplasmic reticulum (GO:0070862)	2022-01-10	0.0588918	0.215019	18.3981	52.1045	INSIG1	gobp	6
0.335417	regulation of epithelial cell apoptotic process (GO:1904035)	2022-01-10	0.0588918	0.215019	18.3981	52.1045	TNF	gobp	6
0.336111	negative regulation of toll-like receptor 4 signaling pathway (GO:0034144)	2022-01-10	0.0588918	0.215019	18.3981	52.1045	LILRA2	gobp	6
0.336806	cellular response to prostaglandin stimulus (GO:0071379)	2022-01-10	0.0588918	0.215019	18.3981	52.1045	GNG2	gobp	6
0.3375	negative regulation of vascular endothelial growth factor signaling pathway (GO:1900747)	2022-01-10	0.0588918	0.215019	18.3981	52.1045	SPRY2	gobp	6
0.338194	regulation of phagocytosis, engulfment (GO:0060099)	2022-01-10	0.0588918	0.215019	18.3981	52.1045	CD300A	gobp	6
0.338889	ectoderm development (GO:0007398)	2022-01-10	0.0588918	0.215019	18.3981	52.1045	ITGAM	gobp	6
0.339583	regulation of podosome assembly (GO:0071801)	2022-01-10	0.0588918	0.215019	18.3981	52.1045	TNF	gobp	6
0.340278	positive regulation of behavior (GO:0048520)	2022-01-10	0.0588918	0.215019	18.3981	52.1045	MEF2C	gobp	6
0.340972	positive regulation of cell activation (GO:0050867)	2022-01-10	0.0588918	0.215019	18.3981	52.1045	LILRA2	gobp	6
0.341667	positive regulation of dendritic spine morphogenesis (GO:0061003)	2022-01-10	0.0588918	0.215019	18.3981	52.1045	DBN1	gobp	6
0.342361	granulocyte migration (GO:0097530)	2022-01-10	0.0588918	0.215019	18.3981	52.1045	ITGB2	gobp	6
0.343056	positive regulation of mesenchymal cell proliferation (GO:0002053)	2022-01-10	0.0588918	0.215019	18.3981	52.1045	PDGFA	gobp	6
0.34375	positive regulation of skeletal muscle tissue development (GO:0048643)	2022-01-10	0.0588918	0.215019	18.3981	52.1045	MEF2C	gobp	6
0.344444	primary alcohol catabolic process (GO:0034310)	2022-01-10	0.0588918	0.215019	18.3981	52.1045	SULT1B1	gobp	6
0.345139	negative regulation of alpha-beta T cell proliferation (GO:0046642)	2022-01-10	0.0588918	0.215019	18.3981	52.1045	LGALS9B	gobp	6
0.345833	inorganic anion transmembrane transport (GO:0098661)	1965-02-01	0.0589957	0.215019	5.28638	14.962	SLC12A5;SLC12A6	gobp	6
0.346528	embryonic organ development (GO:0048568)	1966-02-01	0.0606052	0.220192	5.20352	14.5874	PDGFA;TNF	gobp	6
0.347222	negative regulation of bone remodeling (GO:0046851)	2022-01-11	0.0645884	0.22082	16.5575	45.3629	UBASH3B	gobp	6
0.347917	regulation of cardiac muscle cell differentiation (GO:2000725)	2022-01-11	0.0645884	0.22082	16.5575	45.3629	MEF2C	gobp	6
0.348611	regulation of CD4-positive, alpha-beta T cell proliferation (GO:2000561)	2022-01-11	0.0645884	0.22082	16.5575	45.3629	LGALS9B	gobp	6
0.349306	negative regulation of platelet-derived growth factor receptor signaling pathway (GO:0010642)	2022-01-11	0.0645884	0.22082	16.5575	45.3629	SLC9A3R1	gobp	6
0.35	negative regulation of protein maturation (GO:1903318)	2022-01-11	0.0645884	0.22082	16.5575	45.3629	GAS1	gobp	6
0.350694	negative regulation of sprouting angiogenesis (GO:1903671)	2022-01-11	0.0645884	0.22082	16.5575	45.3629	E2F2	gobp	6
0.351389	regulation of mast cell activation involved in immune response (GO:0033006)	2022-01-11	0.0645884	0.22082	16.5575	45.3629	CD300A	gobp	6
0.352083	regulation of mesenchymal cell proliferation (GO:0010464)	2022-01-11	0.0645884	0.22082	16.5575	45.3629	PDGFA	gobp	6
0.352778	nucleus localization (GO:0051647)	2022-01-11	0.0645884	0.22082	16.5575	45.3629	SLC9A3R1	gobp	6
0.353472	PERK-mediated unfolded protein response (GO:0036499)	2022-01-11	0.0645884	0.22082	16.5575	45.3629	CCL2	gobp	6
0.354167	establishment of epithelial cell apical/basal polarity (GO:0045198)	2022-01-11	0.0645884	0.22082	16.5575	45.3629	SLC9A3R1	gobp	6
0.354861	positive regulation of ceramide biosynthetic process (GO:2000304)	2022-01-11	0.0645884	0.22082	16.5575	45.3629	TNF	gobp	6
0.355556	positive regulation of epidermal growth factor-activated receptor activity (GO:0045741)	2022-01-11	0.0645884	0.22082	16.5575	45.3629	NCF1	gobp	6
0.35625	response to corticosteroid (GO:0031960)	2022-01-11	0.0645884	0.22082	16.5575	45.3629	TNF	gobp	6
0.356944	response to prostaglandin E (GO:0034695)	2022-01-11	0.0645884	0.22082	16.5575	45.3629	GNG2	gobp	6
0.357639	response to sterol (GO:0036314)	2022-01-11	0.0645884	0.22082	16.5575	45.3629	INSIG1	gobp	6
0.358333	positive regulation of leukocyte apoptotic process (GO:2000108)	2022-01-11	0.0645884	0.22082	16.5575	45.3629	MEF2C	gobp	6
0.359028	positive regulation of myelination (GO:0031643)	2022-01-11	0.0645884	0.22082	16.5575	45.3629	ITGAX	gobp	6
0.359722	positive regulation of nitric-oxide synthase biosynthetic process (GO:0051770)	2022-01-11	0.0645884	0.22082	16.5575	45.3629	CCL2	gobp	6
0.360417	positive regulation of sphingolipid biosynthetic process (GO:0090154)	2022-01-11	0.0645884	0.22082	16.5575	45.3629	TNF	gobp	6
0.361111	positive regulation of MAP kinase activity (GO:0043406)	1969-02-01	0.0655227	0.2227	4.96977	13.5444	PDGFA;TNF	gobp	6
0.361806	positive regulation of protein transport (GO:0051222)	1969-02-01	0.0655227	0.2227	4.96977	13.5444	ATP13A2;TNF	gobp	6
0.3625	neutrophil chemotaxis (GO:0030593)	1970-02-01	0.0671908	0.226798	4.89644	13.2215	ITGB2;CCL2	gobp	6
0.363194	negative regulation of neuron apoptotic process (GO:0043524)	1971-02-01	0.068873	0.226798	4.82523	12.9099	MEF2C;CCL2	gobp	6
0.363889	negative regulation of B cell proliferation (GO:0030889)	2022-01-12	0.0702507	0.226798	15.0515	39.9721	CD300A	gobp	6
0.364583	negative regulation of cellular response to vascular endothelial growth factor stimulus (GO:1902548)	2022-01-12	0.0702507	0.226798	15.0515	39.9721	SPRY2	gobp	6
0.365278	negative regulation of gene silencing by miRNA (GO:0060965)	2022-01-12	0.0702507	0.226798	15.0515	39.9721	TNF	gobp	6
0.365972	negative regulation of production of miRNAs involved in gene silencing by miRNA (GO:1903799)	2022-01-12	0.0702507	0.226798	15.0515	39.9721	TNF	gobp	6
0.366667	cellular response to fluid shear stress (GO:0071498)	2022-01-12	0.0702507	0.226798	15.0515	39.9721	MEF2C	gobp	6
0.367361	regulation of hemopoiesis (GO:1903706)	2022-01-12	0.0702507	0.226798	15.0515	39.9721	MAFB	gobp	6
0.368056	regulation of sequestering of calcium ion (GO:0051282)	2022-01-12	0.0702507	0.226798	15.0515	39.9721	UBASH3B	gobp	6
0.36875	positive regulation of cardiocyte differentiation (GO:1905209)	2022-01-12	0.0702507	0.226798	15.0515	39.9721	MEF2C	gobp	6
0.369444	regulation of vascular associated smooth muscle cell migration (GO:1904752)	2022-01-12	0.0702507	0.226798	15.0515	39.9721	MEF2C	gobp	6
0.370139	Golgi localization (GO:0051645)	2022-01-12	0.0702507	0.226798	15.0515	39.9721	SLC9A3R1	gobp	6
0.370833	positive regulation of neuroinflammatory response (GO:0150078)	2022-01-12	0.0702507	0.226798	15.0515	39.9721	TNF	gobp	6
0.371528	smooth muscle cell differentiation (GO:0051145)	2022-01-12	0.0702507	0.226798	15.0515	39.9721	MEF2C	gobp	6
0.372222	macrophage chemotaxis (GO:0048246)	2022-01-12	0.0702507	0.226798	15.0515	39.9721	CCL2	gobp	6
0.372917	synaptic vesicle fusion to presynaptic active zone membrane (GO:0031629)	2022-01-12	0.0702507	0.226798	15.0515	39.9721	STX1A	gobp	6
0.373611	maintenance of protein localization in endoplasmic reticulum (GO:0035437)	2022-01-12	0.0702507	0.226798	15.0515	39.9721	INSIG1	gobp	6
0.374306	melanocyte differentiation (GO:0030318)	2022-01-12	0.0702507	0.226798	15.0515	39.9721	MEF2C	gobp	6
0.375	positive regulation of secretion by cell (GO:1903532)	1972-02-01	0.070569	0.227193	4.75606	12.6091	ATP13A2;STX1A	gobp	6
0.375694	neutrophil degranulation (GO:0043312)	6/481	0.0721096	0.227245	2.13133	5.60448	ARHGAP9;MGAM;ITGAM;CD300A;ITGB2;ITGAX	gobp	6
0.376389	protein autophosphorylation (GO:0046777)	3/159	0.0721424	0.227245	3.21431	8.45078	PIM1;ATP13A2;BMX	gobp	6
0.377083	regulation of actin filament polymerization (GO:0030833)	1973-02-01	0.0722786	0.227245	4.68884	12.3186	SSH3;DBN1	gobp	6
0.377778	granulocyte chemotaxis (GO:0071621)	1973-02-01	0.0722786	0.227245	4.68884	12.3186	ITGB2;CCL2	gobp	6
0.378472	positive regulation of synaptic transmission (GO:0050806)	1973-02-01	0.0722786	0.227245	4.68884	12.3186	CCL2;TNF	gobp	6
0.379167	positive regulation of gene expression (GO:0010628)	6/482	0.0726743	0.227245	2.12674	5.57583	MEF2C;ITGAX;SPRY2;ATP13A2;TNF;LGALS9B	gobp	6
0.379861	regulation of cytokine-mediated signaling pathway (GO:0001959)	1974-02-01	0.0740017	0.227245	4.62348	12.038	IFNGR2;TNF	gobp	6
0.380556	positive regulation of immune response (GO:0050778)	1975-02-01	0.0757379	0.227245	4.55992	11.7668	ITGAM;ITGB2	gobp	6
0.38125	positive regulation of lymphocyte proliferation (GO:0050671)	1975-02-01	0.0757379	0.227245	4.55992	11.7668	CD86;MEF2C	gobp	6
0.381944	positive regulation of T cell activation (GO:0050870)	1975-02-01	0.0757379	0.227245	4.55992	11.7668	CD86;CCL2	gobp	6
0.382639	negative regulation of CD4-positive, alpha-beta T cell activation (GO:2000515)	2022-01-13	0.0758791	0.227245	13.7965	35.5759	LGALS9B	gobp	6
0.383333	regulation of antigen receptor-mediated signaling pathway (GO:0050854)	2022-01-13	0.0758791	0.227245	13.7965	35.5759	CD300A	gobp	6
0.384028	regulation of autophagosome maturation (GO:1901096)	2022-01-13	0.0758791	0.227245	13.7965	35.5759	IRGM	gobp	6
0.384722	regulation of chemokine (C-X-C motif) ligand 2 production (GO:2000341)	2022-01-13	0.0758791	0.227245	13.7965	35.5759	TNF	gobp	6
0.385417	cellular biogenic amine metabolic process (GO:0006576)	2022-01-13	0.0758791	0.227245	13.7965	35.5759	SULT1B1	gobp	6
0.386111	cytoplasmic sequestering of protein (GO:0051220)	2022-01-13	0.0758791	0.227245	13.7965	35.5759	DBN1	gobp	6
0.386806	regulation of platelet-derived growth factor receptor signaling pathway (GO:0010640)	2022-01-13	0.0758791	0.227245	13.7965	35.5759	SLC9A3R1	gobp	6
0.3875	endochondral bone morphogenesis (GO:0060350)	2022-01-13	0.0758791	0.227245	13.7965	35.5759	MEF2C	gobp	6
0.388194	regulation of protein exit from endoplasmic reticulum (GO:0070861)	2022-01-13	0.0758791	0.227245	13.7965	35.5759	INSIG1	gobp	6
0.388889	positive regulation of calcineurin-mediated signaling (GO:0106058)	2022-01-13	0.0758791	0.227245	13.7965	35.5759	TNF	gobp	6
0.389583	positive regulation of calcineurin-NFAT signaling cascade (GO:0070886)	2022-01-13	0.0758791	0.227245	13.7965	35.5759	TNF	gobp	6
0.390278	positive regulation of calcium ion import (GO:0090280)	2022-01-13	0.0758791	0.227245	13.7965	35.5759	CCL2	gobp	6
0.390972	positive regulation of calcium ion-dependent exocytosis (GO:0045956)	2022-01-13	0.0758791	0.227245	13.7965	35.5759	STX1A	gobp	6
0.391667	regulation of T cell differentiation in thymus (GO:0033081)	2022-01-13	0.0758791	0.227245	13.7965	35.5759	TOX	gobp	6
0.392361	positive regulation of protein localization to cell surface (GO:2000010)	2022-01-13	0.0758791	0.227245	13.7965	35.5759	TNF	gobp	6
0.393056	mature B cell differentiation involved in immune response (GO:0002313)	2022-01-13	0.0758791	0.227245	13.7965	35.5759	LFNG	gobp	6
0.39375	protein localization to mitochondrion (GO:0070585)	2022-01-13	0.0758791	0.227245	13.7965	35.5759	RALA	gobp	6
0.394444	neutrophil mediated immunity (GO:0002446)	6/488	0.0761158	0.227367	2.09962	5.40757	ARHGAP9;MGAM;ITGAM;CD300A;ITGB2;ITGAX	gobp	6
0.395139	chloride transport (GO:0006821)	1976-02-01	0.077487	0.228639	4.49807	11.5045	SLC12A5;SLC12A6	gobp	6
0.395833	positive regulation of interleukin-6 production (GO:0032755)	1976-02-01	0.077487	0.228639	4.49807	11.5045	LILRA2;TNF	gobp	6
0.396528	neutrophil migration (GO:1990266)	1977-02-01	0.0792489	0.228639	4.43787	11.2507	ITGB2;CCL2	gobp	6
0.397222	inorganic cation import across plasma membrane (GO:0098659)	1977-02-01	0.0792489	0.228639	4.43787	11.2507	SLC12A5;SLC12A6	gobp	6
0.397917	negative regulation of protein serine/threonine kinase activity (GO:0071901)	1978-02-01	0.0810233	0.228639	4.37926	11.0052	CD300A;SPRY2	gobp	6
0.398611	protein localization to vacuole (GO:0072665)	2022-01-14	0.0814736	0.228639	12.7346	31.9317	ATP13A2	gobp	6
0.399306	negative regulation of cell activation (GO:0050866)	2022-01-14	0.0814736	0.228639	12.7346	31.9317	PDGFA	gobp	6
0.4	negative regulation of fibroblast growth factor receptor signaling pathway (GO:0040037)	2022-01-14	0.0814736	0.228639	12.7346	31.9317	SPRY2	gobp	6
0.400694	negative regulation of interleukin-12 production (GO:0032695)	2022-01-14	0.0814736	0.228639	12.7346	31.9317	MEFV	gobp	6
0.401389	regulation of cell projection organization (GO:0031344)	2022-01-14	0.0814736	0.228639	12.7346	31.9317	SPRY2	gobp	6
0.402083	negative regulation of smooth muscle cell migration (GO:0014912)	2022-01-14	0.0814736	0.228639	12.7346	31.9317	MEF2C	gobp	6
0.402778	cellular response to low-density lipoprotein particle stimulus (GO:0071404)	2022-01-14	0.0814736	0.228639	12.7346	31.9317	ITGB2	gobp	6
0.403472	negative regulation of TORC1 signaling (GO:1904262)	2022-01-14	0.0814736	0.228639	12.7346	31.9317	CASTOR2	gobp	6
0.404167	nuclear migration (GO:0007097)	2022-01-14	0.0814736	0.228639	12.7346	31.9317	SLC9A3R1	gobp	6
0.404861	regulation of nitric-oxide synthase biosynthetic process (GO:0051769)	2022-01-14	0.0814736	0.228639	12.7346	31.9317	CCL2	gobp	6
0.405556	polarized epithelial cell differentiation (GO:0030859)	2022-01-14	0.0814736	0.228639	12.7346	31.9317	SLC9A3R1	gobp	6
0.40625	regulation of response to interferon-gamma (GO:0060330)	2022-01-14	0.0814736	0.228639	12.7346	31.9317	IFNGR2	gobp	6
0.406944	positive regulation of brown fat cell differentiation (GO:0090336)	2022-01-14	0.0814736	0.228639	12.7346	31.9317	PIM1	gobp	6
0.407639	renal absorption (GO:0070293)	2022-01-14	0.0814736	0.228639	12.7346	31.9317	SLC9A3R1	gobp	6
0.408333	positive regulation of granulocyte macrophage colony-stimulating factor production (GO:0032725)	2022-01-14	0.0814736	0.228639	12.7346	31.9317	LILRA2	gobp	6
0.409028	retinal metabolic process (GO:0042574)	2022-01-14	0.0814736	0.228639	12.7346	31.9317	DHRS13	gobp	6
0.409722	positive regulation of T-helper cell differentiation (GO:0045624)	2022-01-14	0.0814736	0.228639	12.7346	31.9317	CD86	gobp	6
0.410417	microvillus organization (GO:0032528)	2022-01-14	0.0814736	0.228639	12.7346	31.9317	SLC9A3R1	gobp	6
0.411111	positive regulation of type 2 immune response (GO:0002830)	2022-01-14	0.0814736	0.228639	12.7346	31.9317	CD86	gobp	6
0.411806	vasodilation (GO:0042311)	2022-01-14	0.0814736	0.228639	12.7346	31.9317	ADRB1	gobp	6
0.4125	negative regulation of cell cycle (GO:0045786)	1980-02-01	0.0846088	0.232426	4.26654	10.5371	SLC9A3R1;GAS1	gobp	6
0.413194	negative regulation of cellular component organization (GO:0051129)	1980-02-01	0.0846088	0.232426	4.26654	10.5371	SPRY2;TNF	gobp	6
0.413889	regulation of fat cell differentiation (GO:0045598)	1980-02-01	0.0846088	0.232426	4.26654	10.5371	TNF;TRIB2	gobp	6
0.414583	regulation of NIK/NF-kappaB signaling (GO:1901222)	1980-02-01	0.0846088	0.232426	4.26654	10.5371	CD86;TNF	gobp	6
0.415278	response to interferon-gamma (GO:0034341)	1980-02-01	0.0846088	0.232426	4.26654	10.5371	CCL2;MEFV	gobp	6
0.415972	positive regulation of MAPK cascade (GO:0043410)	4/274	0.0850276	0.232426	2.48294	6.11989	PDGFA;CCL2;SPRY2;TNF	gobp	6
0.416667	positive regulation of tumor necrosis factor superfamily cytokine production (GO:1903557)	1981-02-01	0.0864195	0.232426	4.21232	10.314	CD86;LILRA2	gobp	6
0.417361	negative regulation of leukocyte activation (GO:0002695)	2022-01-15	0.0870346	0.232426	11.8244	28.8687	CD300A	gobp	6
0.418056	negative regulation of protein processing (GO:0010955)	2022-01-15	0.0870346	0.232426	11.8244	28.8687	GAS1	gobp	6
0.41875	regulation of extracellular matrix organization (GO:1903053)	2022-01-15	0.0870346	0.232426	11.8244	28.8687	AEBP1	gobp	6
0.419444	peptidyl-tyrosine autophosphorylation (GO:0038083)	2022-01-15	0.0870346	0.232426	11.8244	28.8687	BMX	gobp	6
0.420139	establishment of apical/basal cell polarity (GO:0035089)	2022-01-15	0.0870346	0.232426	11.8244	28.8687	SLC9A3R1	gobp	6
0.420833	glucan catabolic process (GO:0009251)	2022-01-15	0.0870346	0.232426	11.8244	28.8687	MGAM	gobp	6
0.421528	positive regulation of exosomal secretion (GO:1903543)	2022-01-15	0.0870346	0.232426	11.8244	28.8687	ATP13A2	gobp	6
0.422222	positive regulation of heterotypic cell-cell adhesion (GO:0034116)	2022-01-15	0.0870346	0.232426	11.8244	28.8687	TNF	gobp	6
0.422917	positive regulation of membrane protein ectodomain proteolysis (GO:0051044)	2022-01-15	0.0870346	0.232426	11.8244	28.8687	TNF	gobp	6
0.423611	integrated stress response signaling (GO:0140467)	2022-01-15	0.0870346	0.232426	11.8244	28.8687	CCL2	gobp	6
0.424306	positive regulation of osteoclast differentiation (GO:0045672)	2022-01-15	0.0870346	0.232426	11.8244	28.8687	TNF	gobp	6
0.425	superoxide anion generation (GO:0042554)	2022-01-15	0.0870346	0.232426	11.8244	28.8687	NCF1	gobp	6
0.425694	macrophage migration (GO:1905517)	2022-01-15	0.0870346	0.232426	11.8244	28.8687	CCL2	gobp	6
0.426389	microvillus assembly (GO:0030033)	2022-01-15	0.0870346	0.232426	11.8244	28.8687	SLC9A3R1	gobp	6
0.427083	epidermis development (GO:0008544)	1983-02-01	0.0900757	0.235779	4.1079	9.88813	EMP1;GLI1	gobp	6
0.427778	positive regulation of nucleic acid-templated transcription (GO:1903508)	6/511	0.0901558	0.235779	2.00162	4.81633	CD86;MEF2C;MAFB;NCF1;GLI1;TNF	gobp	6
0.428472	lymphocyte differentiation (GO:0030098)	1984-02-01	0.0919209	0.235779	4.05759	9.68478	LFNG;TOX	gobp	6
0.429167	negative regulation of epithelial cell differentiation (GO:0030857)	2022-01-16	0.0925622	0.235779	11.0356	26.2632	SPRY2	gobp	6
0.429861	regulation of amyloid-beta clearance (GO:1900221)	2022-01-16	0.0925622	0.235779	11.0356	26.2632	TNF	gobp	6
0.430556	negative regulation of immune effector process (GO:0002698)	2022-01-16	0.0925622	0.235779	11.0356	26.2632	CD300A	gobp	6
0.43125	regulation of ceramide biosynthetic process (GO:2000303)	2022-01-16	0.0925622	0.235779	11.0356	26.2632	TNF	gobp	6
0.431944	negative regulation of platelet activation (GO:0010544)	2022-01-16	0.0925622	0.235779	11.0356	26.2632	PDGFA	gobp	6
0.432639	cellular polysaccharide catabolic process (GO:0044247)	2022-01-16	0.0925622	0.235779	11.0356	26.2632	MGAM	gobp	6
0.433333	regulation of granulocyte macrophage colony-stimulating factor production (GO:0032645)	2022-01-16	0.0925622	0.235779	11.0356	26.2632	LILRA2	gobp	6
0.434028	cellular response to sterol (GO:0036315)	2022-01-16	0.0925622	0.235779	11.0356	26.2632	INSIG1	gobp	6
0.434722	regulation of hormone secretion (GO:0046883)	2022-01-16	0.0925622	0.235779	11.0356	26.2632	FFAR2	gobp	6
0.435417	regulation of interleukin-1 production (GO:0032652)	2022-01-16	0.0925622	0.235779	11.0356	26.2632	MEFV	gobp	6
0.436111	neutrophil activation (GO:0042119)	2022-01-16	0.0925622	0.235779	11.0356	26.2632	LILRA2	gobp	6
0.436806	regulation of mast cell degranulation (GO:0043304)	2022-01-16	0.0925622	0.235779	11.0356	26.2632	CD300A	gobp	6
0.4375	digestive tract morphogenesis (GO:0048546)	2022-01-16	0.0925622	0.235779	11.0356	26.2632	GLI1	gobp	6
0.438194	regulation of neurotransmitter transport (GO:0051588)	2022-01-16	0.0925622	0.235779	11.0356	26.2632	MEF2C	gobp	6
0.438889	platelet-derived growth factor receptor signaling pathway (GO:0048008)	2022-01-16	0.0925622	0.235779	11.0356	26.2632	PDGFA	gobp	6
0.439583	eosinophil chemotaxis (GO:0048245)	2022-01-16	0.0925622	0.235779	11.0356	26.2632	CCL2	gobp	6
0.440278	eosinophil migration (GO:0072677)	2022-01-16	0.0925622	0.235779	11.0356	26.2632	CCL2	gobp	6
0.440972	positive regulation of endothelial cell apoptotic process (GO:2000353)	2022-01-16	0.0925622	0.235779	11.0356	26.2632	CCL2	gobp	6
0.441667	adenylate cyclase-activating adrenergic receptor signaling pathway (GO:0071880)	2022-01-17	0.0980565	0.240779	10.3453	24.024	ADRB1	gobp	6
0.442361	negative regulation of chemokine production (GO:0032682)	2022-01-17	0.0980565	0.240779	10.3453	24.024	MEFV	gobp	6
0.443056	negative regulation of cytokine production involved in immune response (GO:0002719)	2022-01-17	0.0980565	0.240779	10.3453	24.024	TNF	gobp	6
0.44375	negative regulation of interleukin-10 production (GO:0032693)	2022-01-17	0.0980565	0.240779	10.3453	24.024	TRIB2	gobp	6
0.444444	negative regulation of peptidyl-threonine phosphorylation (GO:0010801)	2022-01-17	0.0980565	0.240779	10.3453	24.024	SPRY2	gobp	6
0.445139	negative regulation of phagocytosis (GO:0050765)	2022-01-17	0.0980565	0.240779	10.3453	24.024	CD300A	gobp	6
0.445833	regulation of establishment of endothelial barrier (GO:1903140)	2022-01-17	0.0980565	0.240779	10.3453	24.024	TNF	gobp	6
0.446528	cellular response to fatty acid (GO:0071398)	2022-01-17	0.0980565	0.240779	10.3453	24.024	FFAR2	gobp	6
0.447222	negative regulation of vascular associated smooth muscle cell proliferation (GO:1904706)	2022-01-17	0.0980565	0.240779	10.3453	24.024	MEF2C	gobp	6
0.447917	regulation of NLRP3 inflammasome complex assembly (GO:1900225)	2022-01-17	0.0980565	0.240779	10.3453	24.024	MEFV	gobp	6
0.448611	positive regulation of cytokine production involved in inflammatory response (GO:1900017)	2022-01-17	0.0980565	0.240779	10.3453	24.024	TNF	gobp	6
0.449306	positive regulation of DNA replication (GO:0045740)	2022-01-17	0.0980565	0.240779	10.3453	24.024	GLI1	gobp	6
0.45	positive regulation of heart rate (GO:0010460)	2022-01-17	0.0980565	0.240779	10.3453	24.024	ADRB1	gobp	6
0.450694	sulfation (GO:0051923)	2022-01-17	0.0980565	0.240779	10.3453	24.024	SULT1B1	gobp	6
0.451389	synaptic vesicle membrane organization (GO:0048499)	2022-01-17	0.0980565	0.240779	10.3453	24.024	STX1A	gobp	6
0.452083	positive regulation of regulated secretory pathway (GO:1903307)	2022-01-17	0.0980565	0.240779	10.3453	24.024	STX1A	gobp	6
0.452778	modified amino acid transport (GO:0072337)	2022-01-17	0.0980565	0.240779	10.3453	24.024	SLC9A3R1	gobp	6
0.453472	positive regulation of neuron projection development (GO:0010976)	1988-02-01	0.0994101	0.242378	3.86809	8.92948	TOX;DBN1	gobp	6
0.454167	positive regulation of transcription, DNA-templated (GO:0045893)	11/1183	0.1028	0.242378	1.59616	3.63121	CD86;KLF10;MEF2C;MAFB;NCF1;KMT2C;DPF3;E2F2;GLI1;TNF;VENTX	gobp	6
0.454861	negative regulation of protein kinase activity (GO:0006469)	1990-02-01	0.103217	0.242378	3.77979	8.58361	UBASH3B;TRIB2	gobp	6
0.455556	positive regulation of autophagy (GO:0010508)	1990-02-01	0.103217	0.242378	3.77979	8.58361	MEFV;IRGM	gobp	6
0.45625	acidic amino acid transport (GO:0015800)	2022-01-18	0.103518	0.242378	9.73627	22.082	SLC9A3R1	gobp	6
0.456944	protein O-linked mannosylation (GO:0035269)	2022-01-18	0.103518	0.242378	9.73627	22.082	TMTC2	gobp	6
0.457639	regulation of adaptive immune response (GO:0002819)	2022-01-18	0.103518	0.242378	9.73627	22.082	SAMSN1	gobp	6
0.458333	negative regulation of fibroblast proliferation (GO:0048147)	2022-01-18	0.103518	0.242378	9.73627	22.082	CD300A	gobp	6
0.459028	regulation of brown fat cell differentiation (GO:0090335)	2022-01-18	0.103518	0.242378	9.73627	22.082	PIM1	gobp	6
0.459722	negative regulation of lipid catabolic process (GO:0050995)	2022-01-18	0.103518	0.242378	9.73627	22.082	TNF	gobp	6
0.460417	cellular response to pH (GO:0071467)	2022-01-18	0.103518	0.242378	9.73627	22.082	GPR68	gobp	6
0.461111	cellular response to zinc ion (GO:0071294)	2022-01-18	0.103518	0.242378	9.73627	22.082	ATP13A2	gobp	6
0.461806	regulation of production of miRNAs involved in gene silencing by miRNA (GO:1903798)	2022-01-18	0.103518	0.242378	9.73627	22.082	TNF	gobp	6
0.4625	regulation of protein-containing complex disassembly (GO:0043244)	2022-01-18	0.103518	0.242378	9.73627	22.082	TNF	gobp	6
0.463194	positive regulation of amyloid-beta formation (GO:1902004)	2022-01-18	0.103518	0.242378	9.73627	22.082	TNF	gobp	6
0.463889	positive regulation of cell cycle phase transition (GO:1901989)	2022-01-18	0.103518	0.242378	9.73627	22.082	GLI1	gobp	6
0.464583	positive regulation of interleukin-4 production (GO:0032753)	2022-01-18	0.103518	0.242378	9.73627	22.082	CD86	gobp	6
0.465278	positive regulation of myoblast differentiation (GO:0045663)	2022-01-18	0.103518	0.242378	9.73627	22.082	MEF2C	gobp	6
0.465972	positive regulation of nervous system process (GO:0031646)	2022-01-18	0.103518	0.242378	9.73627	22.082	ITGAX	gobp	6
0.466667	positive regulation of nitric-oxide synthase activity (GO:0051000)	2022-01-18	0.103518	0.242378	9.73627	22.082	TNF	gobp	6
0.467361	leukocyte tethering or rolling (GO:0050901)	2022-01-18	0.103518	0.242378	9.73627	22.082	TNF	gobp	6
0.468056	positive regulation of phosphoprotein phosphatase activity (GO:0032516)	2022-01-18	0.103518	0.242378	9.73627	22.082	CD300A	gobp	6
0.46875	positive regulation of synaptic transmission, glutamatergic (GO:0051968)	2022-01-18	0.103518	0.242378	9.73627	22.082	CCL2	gobp	6
0.469444	toll-like receptor signaling pathway (GO:0002224)	1991-02-01	0.105136	0.243293	3.73714	8.41791	ITGAM;ITGB2	gobp	6
0.470139	positive regulation of cellular component biogenesis (GO:0044089)	1992-02-01	0.107064	0.243293	3.69542	8.25679	ATP13A2;TNF	gobp	6
0.470833	regulation of GTPase activity (GO:0043087)	3/189	0.107087	0.243293	2.69177	6.01372	ARHGAP9;CCL2;ADRB1	gobp	6
0.471528	purine ribonucleoside bisphosphate metabolic process (GO:0034035)	2022-01-19	0.108947	0.243293	9.19491	20.3842	SULT1B1	gobp	6
0.472222	negative regulation of cytokine production involved in inflammatory response (GO:1900016)	2022-01-19	0.108947	0.243293	9.19491	20.3842	MEFV	gobp	6
0.472917	regulation of autophagy of mitochondrion (GO:1903146)	2022-01-19	0.108947	0.243293	9.19491	20.3842	ATP13A2	gobp	6
0.473611	regulation of bicellular tight junction assembly (GO:2000810)	2022-01-19	0.108947	0.243293	9.19491	20.3842	TNF	gobp	6
0.474306	negative regulation of nervous system development (GO:0051961)	2022-01-19	0.108947	0.243293	9.19491	20.3842	TNF	gobp	6
0.475	regulation of exosomal secretion (GO:1903541)	2022-01-19	0.108947	0.243293	9.19491	20.3842	ATP13A2	gobp	6
0.475694	negative regulation of RNA metabolic process (GO:0051253)	2022-01-19	0.108947	0.243293	9.19491	20.3842	TNF	gobp	6
0.476389	neural crest cell differentiation (GO:0014033)	2022-01-19	0.108947	0.243293	9.19491	20.3842	MEF2C	gobp	6
0.477083	regulation of lymphocyte proliferation (GO:0050670)	2022-01-19	0.108947	0.243293	9.19491	20.3842	CD22	gobp	6
0.477778	regulation of neuroinflammatory response (GO:0150077)	2022-01-19	0.108947	0.243293	9.19491	20.3842	TNF	gobp	6
0.478472	ethanol metabolic process (GO:0006067)	2022-01-19	0.108947	0.243293	9.19491	20.3842	SULT1B1	gobp	6
0.479167	excitatory postsynaptic potential (GO:0060079)	2022-01-19	0.108947	0.243293	9.19491	20.3842	MEF2C	gobp	6
0.479861	regulation of vascular endothelial growth factor signaling pathway (GO:1900746)	2022-01-19	0.108947	0.243293	9.19491	20.3842	SPRY2	gobp	6
0.480556	positive regulation of establishment of protein localization (GO:1904951)	2022-01-19	0.108947	0.243293	9.19491	20.3842	TNF	gobp	6
0.48125	response to fatty acid (GO:0070542)	2022-01-19	0.108947	0.243293	9.19491	20.3842	FFAR2	gobp	6
0.481944	positive regulation of mitochondrial fission (GO:0090141)	2022-01-19	0.108947	0.243293	9.19491	20.3842	RALA	gobp	6
0.482639	positive regulation of oxidoreductase activity (GO:0051353)	2022-01-19	0.108947	0.243293	9.19491	20.3842	TNF	gobp	6
0.483333	leukocyte adhesion to vascular endothelial cell (GO:0061756)	2022-01-19	0.108947	0.243293	9.19491	20.3842	TNF	gobp	6
0.484028	striated muscle cell differentiation (GO:0051146)	2022-01-19	0.108947	0.243293	9.19491	20.3842	MEF2C	gobp	6
0.484722	myeloid cell activation involved in immune response (GO:0002275)	2022-01-19	0.108947	0.243293	9.19491	20.3842	LILRA2	gobp	6
0.485417	N-glycan processing (GO:0006491)	2022-01-19	0.108947	0.243293	9.19491	20.3842	MGAT4B	gobp	6
0.486111	negative regulation of cell differentiation (GO:0045596)	3/191	0.109618	0.244321	2.66287	5.88695	SPRY2;TNF;TRIB2	gobp	6
0.486806	MAPK cascade (GO:0000165)	4/303	0.112034	0.246784	2.2388	4.90063	MEF2C;PDGFA;CCL2;TNF	gobp	6
0.4875	cellular response to tumor necrosis factor (GO:0071356)	3/194	0.113457	0.246784	2.62064	5.70339	TNFRSF12A;CCL2;TNF	gobp	6
0.488194	adaptive immune response based on somatic recombination of immune receptors built from immunoglobulin superfamily domains (GO:0002460)	2022-01-20	0.114343	0.246784	8.71053	18.8893	BACH2	gobp	6
0.488889	adrenergic receptor signaling pathway (GO:0071875)	2022-01-20	0.114343	0.246784	8.71053	18.8893	ADRB1	gobp	6
0.489583	regulation of acute inflammatory response (GO:0002673)	2022-01-20	0.114343	0.246784	8.71053	18.8893	FFAR2	gobp	6
0.490278	negative regulation of lipid storage (GO:0010888)	2022-01-20	0.114343	0.246784	8.71053	18.8893	TNF	gobp	6
0.490972	negative regulation of osteoclast differentiation (GO:0045671)	2022-01-20	0.114343	0.246784	8.71053	18.8893	MAFB	gobp	6
0.491667	regulation of fibroblast growth factor receptor signaling pathway (GO:0040036)	2022-01-20	0.114343	0.246784	8.71053	18.8893	SPRY2	gobp	6
0.492361	cellular response to interferon-beta (GO:0035458)	2022-01-20	0.114343	0.246784	8.71053	18.8893	IRGM	gobp	6
0.493056	cortical actin cytoskeleton organization (GO:0030866)	2022-01-20	0.114343	0.246784	8.71053	18.8893	TNF	gobp	6
0.49375	embryonic digestive tract development (GO:0048566)	2022-01-20	0.114343	0.246784	8.71053	18.8893	TNF	gobp	6
0.494444	epithelial cilium movement involved in extracellular fluid movement (GO:0003351)	2022-01-20	0.114343	0.246784	8.71053	18.8893	SLC9A3R1	gobp	6
0.495139	establishment of epithelial cell polarity (GO:0090162)	2022-01-20	0.114343	0.246784	8.71053	18.8893	SLC9A3R1	gobp	6
0.495833	regulation of smooth muscle cell migration (GO:0014910)	2022-01-20	0.114343	0.246784	8.71053	18.8893	PDGFA	gobp	6
0.496528	positive regulation of dendrite morphogenesis (GO:0050775)	2022-01-20	0.114343	0.246784	8.71053	18.8893	DBN1	gobp	6
0.497222	positive regulation of nitrogen compound metabolic process (GO:0051173)	2022-01-20	0.114343	0.246784	8.71053	18.8893	TNF	gobp	6
0.497917	mesoderm development (GO:0007498)	2022-01-20	0.114343	0.246784	8.71053	18.8893	BMX	gobp	6
0.498611	protein localization to membrane (GO:0072657)	3/195	0.114748	0.247198	2.60686	5.6439	SLC9A3R1;ITGB2;TNF	gobp	6
04:01:00	ZXDC DEPLETION HUMAN GSE45417 CREEDSID GENE 3044 DOWN	18/316	6.82495e-13	9.63682e-10	11.483	321.672	CD86;LRRC25;SLFN5;ITGAM;NCF1;CD300A;NCF1C;EMP1;PPP1R18;ADGRE1;MAFB;PIM1;ITGAX;TOGARAM2;CCL2;SPRY2;SLC12A6;CD22	tf_perturb	6
04:02:00	SP140 KD PBMC HUMAN GSE83381 RNASEQ DOWN	14/403	1.55491e-07	0.000109777	6.55551	102.769	SMIM3;SLFN5;NCF1;INSIG1;NCF1B;NCF1C;EMP1;LSP1;LILRA2;PPP1R18;MAFB;ITGAX;CCL2;FFAR2	tf_perturb	6
04:03:00	MBD2 KO MOUSE GSE48653 CREEDSID GENE 1051 UP	12/389	4.30535e-06	0.00202639	5.69498	70.3652	SMIM3;ADGRE1;MEF2C;MAFB;ITGAM;NCF1;CD300A;ITGAX;EMP1;SPRY2;METTL9;CD22	tf_perturb	6
04:04:00	FOSL1 KO MOUSE GSE43695 CREEDSID GENE 2302 DOWN	10/302	1.5337e-05	0.00458473	6.04313	66.9896	CD86;ADGRE1;LRRC25;MAFB;ITGAM;CYTH4;TNFRSF12A;CCL2;IRGM;DBN1	tf_perturb	6
04:05:00	FOSL1 KO MOUSE GSE43695 CREEDSID GENE 2301 UP	10/304	1.62349e-05	0.00458473	6.00141	66.1856	CD86;ADGRE1;LRRC25;MAFB;ITGAM;CYTH4;TNFRSF12A;CCL2;IRGM;DBN1	tf_perturb	6
04:06:00	U2AF1 OE CFUG HUMAN GSE94153 RNASEQ DOWN	8/190	2.06208e-05	0.00485275	7.66197	82.6666	LRRC25;ITGAM;CD300A;ITGB2;ITGAX;EMP1;CCL2;LSP1	tf_perturb	6
04:07:00	MYC KO MOUSE GSE58079 CREEDSID GENE 2553 UP	9/263	3.21389e-05	0.00643369	6.2087	64.2317	CD86;LFNG;CYTH4;GPR68;ITGB2;EMP1;LSP1;IRGM;BACH2	tf_perturb	6
04:08:00	E2F8 KO MOUSE GSE52157 CREEDSID GENE 2828 DOWN	11/406	3.64515e-05	0.00643369	4.93266	50.4094	CD86;PRR5;MEF2C;CYTH4;ITGB2;ITGAX;ARAP2;LSP1;PPP1R18;BACH2;CD22	tf_perturb	6
04:09:00	RUNX1 KD HUMAN GSE29639 CREEDSID GENE 1288 UP	8/224	6.6407e-05	0.0104185	6.44477	61.9968	KLF10;MGAM;HSH2D;ITGB2;SPRY2;ATP13A2;TNF;HCST	tf_perturb	6
04:10:00	CEBPA UNK HUMAN GSE33223 CREEDSID GENE 2097 DOWN	8/243	0.000116977	0.0165171	5.91798	53.5787	ADGRE1;MGAM;NCF1;NCF1C;EMP1;CCL2;ADRB1;FFAR2	tf_perturb	6
04:11:00	IRF5 KD HUMAN GSE50588 CREEDSID GENE 2801 UP	9/321	0.000147938	0.0189899	5.03958	44.4426	CD86;ADGRE1;HSH2D;ITGAM;ANKRD22;ITGB2;E2F2;FFAR2;NCALD	tf_perturb	6
04:12:00	IKZF1 KO MOUSE GSE46093 CREEDSID GENE 2547 DOWN	6/136	0.000179327	0.0211008	7.92602	68.3722	INSIG1;ITGB2;ARAP2;TRIB2;SAMSN1;HCST	tf_perturb	6
04:13:00	NFKB2 KD HUMAN GSE50588 CREEDSID GENE 2806 UP	9/333	0.000194579	0.0211342	4.84995	41.4412	ADGRE1;GNG2;INSIG1;ANKRD22;PCED1B;NCF1C;SPRY2;TNF;HCST	tf_perturb	6
04:14:00	MAF SIRNA MACROPHAGE HUMAN GSE98368 RNASEQ UP	6/142	0.000226703	0.0228647	7.57404	63.5604	MAFB;IFNGR2;ITGB2;ITGAX;CCL2;LSP1	tf_perturb	6
04:15:00	EZH2 SHRNA PROE HUMAN GSE59089 RNASEQ UP	9/349	0.000275271	0.0259122	4.61794	37.8567	ITGAM;NCF1;ITGB2;MGAT4B;NCF1B;NCF1C;LSP1;LILRA2;METTL9	tf_perturb	6
04:16:00	FLI1 KD HUMAN GSE27524 CREEDSID GENE 1598 UP	10/434	0.000309681	0.0273294	4.13373	33.4004	ZCCHC24;MEF2C;PIM1;EMP1;CCL2;SPRY2;AEBP1;SOBP;TRIB2;BACH2	tf_perturb	6
04:17:00	IKZF1 KO MOUSE GSE46093 CREEDSID GENE 2547 UP	9/367	0.000397422	0.0330094	4.38171	34.311	LFNG;ZCCHC24;CYTH4;EMP1;SPRY2;BTBD11;TNF;IRGM;RBMS2	tf_perturb	6
04:18:00	MECOM OE MOUSE GSE34729 CREEDSID GENE 1428 DOWN	7/224	0.000431426	0.033843	5.56367	43.1096	CD86;ADGRE1;MGAM;ITGB2;ITGAX;CCL2;CLNK	tf_perturb	6
04:19:00	CEBPA KO MOUSE GSE61468 CREEDSID GENE 1476 UP	7/238	0.000618797	0.0459864	5.22275	38.5843	SMIM3;KLF10;TNFRSF12A;SPNS2;PIM1;CLNK;TOX	tf_perturb	6
04:20:00	FOXA2 KO MOUSE GSE19204 CREEDSID GENE 2166 UP	8/322	0.00077109	0.0528987	4.41125	31.6185	ADGRE1;MGAM;CYTH4;NCF1;GPR68;ITGB2;ITGAX;FFAR2	tf_perturb	6
04:21:00	HIF1A KO MOUSE GSE35111 CREEDSID GENE 1406 DOWN	8/323	0.000786737	0.0528987	4.39702	31.4282	ANKRD22;ITGAX;TMTC2;EMP1;CLNK;LSP1;TOX;BMX	tf_perturb	6
04:22:00	DNMT1 INHIBITION HUMAN GSE45804 CREEDSID GENE 2762 DOWN	7/265	0.00115937	0.0744102	4.66976	31.567	KLF10;SLFN5;MEF2C;ARAP2;TRIB2;RBMS2;DBN1	tf_perturb	6
04:23:00	DNMT1 KO MOUSE GSE27434 CREEDSID GENE 1052 UP	8/353	0.00138892	0.0852674	4.00852	26.373	SMIM3;IL18RAP;ITGAM;NCF1;EMP1;CLNK;SPRY2;FFAR2	tf_perturb	6
04:24:00	NCOA2 KO MOUSE GSE55002 CREEDSID GENE 199 DOWN	7/279	0.0015576	0.0916248	4.42624	28.614	CD86;ADGRE1;KLF10;MAFB;ITGB2;LSP1;PLCXD2	tf_perturb	6
04:25:00	NFIX KD MOUSE GSE45492 CREEDSID GENE 2846 UP	7/281	0.00162225	0.0916248	4.39349	28.2235	PRR5;ITGAM;IFNGR2;ITGB2;ITGAX;LSP1;CD22	tf_perturb	6
04:26:00	HMGA2 OE MOUSE GSE24071 CREEDSID GENE 2564 DOWN	7/289	0.00190207	0.103297	4.26711	26.7326	MEF2C;IL18RAP;ITGAM;CYTH4;ARAP2;LSP1;BACH2	tf_perturb	6
04:27:00	IKZF3 MUT MOUSE GSE12356 CREEDSID GENE 599 UP	6/219	0.00217588	0.108385	4.81715	29.5307	ATP13A2;LSP1;SLC12A6;TRIB2;PPP1R18;BACH2	tf_perturb	6
04:28:00	TFAP2C KD HUMAN GSE15481 CREEDSID GENE 2970 UP	7/296	0.00217643	0.108385	4.16227	25.515	SLFN5;HSH2D;MAFB;PIM1;TMTC2;CCL2;TRIB2	tf_perturb	6
04:29:00	IRF9 OE HUMAN GSE50002 CREEDSID GENE 1657 UP	6/220	0.00222603	0.108385	4.79439	29.2819	LFNG;TNFRSF12A;PIM1;ARAP2;EMP1;IRGM	tf_perturb	6
04:30:00	TFAP2C KD HUMAN GSE15481 CREEDSID GENE 2968 UP	7/300	0.00234641	0.110438	4.1046	24.8528	TNFRSF12A;ANKRD22;PIM1;TMTC2;CCL2;PPP1R18;DBN1	tf_perturb	6
04:31:00	FLI1 KD HUMAN GSE27524 CREEDSID GENE 1600 UP	8/386	0.00242542	0.110474	3.65239	21.9938	ZCCHC24;MEF2C;PIM1;EMP1;CCL2;SPRY2;SOBP;BACH2	tf_perturb	6
04:32:00	TFAP2C SIRNA HUMAN GSE15481 CREEDSID GENE 2895 UP	7/307	0.00266835	0.116254	4.0074	23.749	SLFN5;HSH2D;MAFB;PIM1;TMTC2;CCL2;TRIB2	tf_perturb	6
04:33:00	TFAP2C SIRNA HUMAN GSE15481 CREEDSID GENE 2893 UP	7/308	0.00271698	0.116254	3.99388	23.5968	KLF10;TNFRSF12A;ANKRD22;PIM1;TMTC2;PPP1R18;DBN1	tf_perturb	6
04:34:00	FLI1 KD HUMAN GSE27524 CREEDSID GENE 1601 UP	8/398	0.00292542	0.121491	3.53783	20.6408	ZCCHC24;MEF2C;PIM1;EMP1;CCL2;SPRY2;SOBP;BACH2	tf_perturb	6
04:35:00	NFE2L2 KO MOUSE GSE18344 CREEDSID GENE 1260 DOWN	8/402	0.00310885	0.12542	3.50119	20.2141	LFNG;MAFB;CYTH4;TOGARAM2;ATP13A2;SSH3;PPP1R18;CD22	tf_perturb	6
04:36:00	GTF2B KD HUMAN GSE50588 CREEDSID GENE 2798 UP	7/320	0.00335535	0.130672	3.83841	21.8682	CD86;ARHGAP9;ANKRD22;NCF1C;E2F2;FFAR2;PPP1R18	tf_perturb	6
04:37:00	FOXP2 OE SHSY5Y HUMAN GSE100291 RNASEQ DOWN	6/240	0.00342412	0.130672	4.38016	24.8658	SULT1B1;TNFRSF12A;EMP1;GAS1;CCL2;AEBP1	tf_perturb	6
04:38:00	RORC KO MOUSE GSE27241 CREEDSID GENE 1686 UP	5/168	0.00357915	0.132994	5.21367	29.3667	CD86;KLF10;INSIG1;PIM1;ITGAX	tf_perturb	6
04:39:00	FLI1 KD HUMAN GSE27524 CREEDSID GENE 1602 UP	7/333	0.00417004	0.143163	3.68289	20.1816	ZCCHC24;MEF2C;INSIG1;EMP1;CCL2;SPRY2;SOBP	tf_perturb	6
04:40:00	GFI1B OE MOUSE GSE33709 CREEDSID GENE 772 UP	6/250	0.00417775	0.143163	4.1985	22.9993	RALA;IL18RAP;GNG2;ARAP2;EMP1;BACH2	tf_perturb	6
04:41:00	GFI1B OE MOUSE GSE33709 CREEDSID GENE 452 DOWN	6/250	0.00417775	0.143163	4.1985	22.9993	RALA;IL18RAP;GNG2;ARAP2;EMP1;BACH2	tf_perturb	6
04:42:00	FLI1 KD HUMAN GSE27524 CREEDSID GENE 1596 UP	7/335	0.00430762	0.143163	3.66006	19.9377	ZCCHC24;MEF2C;PIM1;CCL2;SPRY2;SOBP;BACH2	tf_perturb	6
04:43:00	TWIST1 OE MOUSE GSE50002 CREEDSID GENE 1075 DOWN	5/176	0.00435979	0.143163	4.96774	27.0013	LFNG;KLF10;SPNS2;PIM1;EMP1	tf_perturb	6
04:44:00	FLI1 KD HUMAN GSE27524 CREEDSID GENE 1599 UP	7/340	0.00466662	0.146428	3.60418	19.3448	ZCCHC24;MEF2C;PIM1;CCL2;SPRY2;SOBP;BACH2	tf_perturb	6
04:45:00	FLI1 KD HUMAN GSE27524 CREEDSID GENE 1604 UP	7/340	0.00466662	0.146428	3.60418	19.3448	ZCCHC24;MEF2C;EMP1;CCL2;SPRY2;SOBP;BACH2	tf_perturb	6
04:46:00	GFI1B OE MOUSE GSE33709 CREEDSID GENE 452 UP	6/261	0.00514153	0.152367	4.01514	21.1614	SMIM3;ZCCHC24;CYTH4;NCF1;INSIG1;LSP1	tf_perturb	6
04:47:00	GFI1B OE MOUSE GSE33709 CREEDSID GENE 772 DOWN	6/262	0.00523659	0.152367	3.99925	21.0044	SMIM3;ZCCHC24;CYTH4;NCF1;INSIG1;LSP1	tf_perturb	6
04:48:00	GATA1 KD MOUSE GSE2527 CREEDSID GENE 108 DOWN	7/348	0.00528751	0.152367	3.51819	18.4438	SMIM3;ADGRE1;SLC9A3R1;UBASH3B;ITGB2;PIM1;IRGM	tf_perturb	6
04:49:00	RELA KD HUMAN GSE50588 CREEDSID GENE 2819 DOWN	7/348	0.00528751	0.152367	3.51819	18.4438	CD86;KLF10;INSIG1;IFNGR2;PIM1;HCST;METTL9	tf_perturb	6
04:50:00	LEF1 KD HUMAN GSE42637 CREEDSID GENE 1775 UP	7/351	0.00553569	0.156328	3.48697	18.1202	CD86;KLF10;TMEM156;PCED1B;LSP1;ZNF786;SAMSN1	tf_perturb	6
04:51:00	FLI1 KD HUMAN GSE27524 CREEDSID GENE 1597 UP	7/359	0.00624029	0.169971	3.40632	17.293	MEF2C;PIM1;EMP1;CCL2;SPRY2;SOBP;BACH2	tf_perturb	6
04:52:00	PPARG KO MOUSE GSE24292 CREEDSID GENE 3012 UP	6/272	0.00625955	0.169971	3.84694	19.518	SLC9A3R1;PDGFA;EMP1;FAM20C;LSP1;PPP1R18	tf_perturb	6
04:53:00	SNAI1 OE HUMAN GSE14773 CREEDSID GENE 371 UP	6/281	0.0072984	0.194047	3.71934	18.2995	ARHGAP9;KLF10;INSIG1;PDGFA;CCL2;TRIB2	tf_perturb	6
04:54:00	VDR OE HUMAN GSE5145 CREEDSID GENE 2944 DOWN	6/282	0.00742108	0.194047	3.70567	18.1705	MEF2C;MAFB;EMP1;SPRY2;TRIB2;NCALD	tf_perturb	6
04:55:00	MYB OE HUMAN GSE2816 CREEDSID GENE 2154 DOWN	8/469	0.0077287	0.198417	2.98205	14.5012	CD86;ADGRE1;RALA;MAFB;NCF1;NCF1C;CCL2;SAMSN1	tf_perturb	6
04:56:00	STAT1 KO MOUSE GSE48970 CREEDSID GENE 1519 UP	5/204	0.00804976	0.199163	4.26269	20.5552	INSIG1;ITGAX;PDGFA;MEFV;MPP6	tf_perturb	6
04:57:00	ZBTB7A KO MOUSE GSE41839 CREEDSID GENE 2380 UP	5/204	0.00804976	0.199163	4.26269	20.5552	HSH2D;SLC12A5;PIM1;ITGAX;IRGM	tf_perturb	6
04:58:00	BCL11A KO MOUSE GSE28333 CREEDSID GENE 1542 DOWN	5/205	0.00821201	0.199163	4.24116	20.3667	ITGAM;NCF1;ITGB2;LSP1;BACH2	tf_perturb	6
04:59:00	FLI1 KD HUMAN GSE27524 CREEDSID GENE 1612 UP	6/289	0.00832197	0.199163	3.61272	17.3008	ZCCHC24;MEF2C;INSIG1;EMP1;SPRY2;SOBP	tf_perturb	6
0.208333	PAX5 KD HUMAN GSE50588 CREEDSID GENE 2810 UP	6/297	0.00944506	0.214904	3.51197	16.3737	SLC9A3R1;SLFN5;TMEM156;MEF2C;PCED1B;NCALD	tf_perturb	6
0.209028	NR2E3 OE MOUSE GSE5338 CREEDSID GENE 2384 DOWN	7/389	0.00949007	0.214904	3.13399	14.5966	MGAT4B;PDGFA;ADRB1;PLCXD2;METTL9;MPP6;BACH2	tf_perturb	6
0.209722	GATA3 KO MOUSE GSE39864 CREEDSID GENE 1162 UP	6/298	0.0095927	0.214904	3.49976	16.2625	CD86;ADGRE1;NCF1;CD300A;EMP1;CD22	tf_perturb	6
0.210417	NCOA1 KD HUMAN GSE28645 CREEDSID GENE 888 UP	7/390	0.00961629	0.214904	3.12565	14.5164	ADGRE1;MEF2C;HSH2D;SPRY2;TNF;BACH2;RBMS2	tf_perturb	6
0.211111	AHR MUT MOUSE GSE44715 CREEDSID GENE 1467 UP	6/299	0.00974198	0.214904	3.48764	16.1523	ITGB2;FFAR2;ATP13A2;LSP1;TNF;TRIB2	tf_perturb	6
0.211806	FLI1 KD HUMAN GSE27524 CREEDSID GENE 1608 UP	6/300	0.00989291	0.214904	3.4756	16.0431	ZCCHC24;MEF2C;INSIG1;EMP1;SPRY2;SOBP	tf_perturb	6
0.2125	FLI1 KD HUMAN GSE27524 CREEDSID GENE 1609 UP	6/302	0.0101998	0.218213	3.45176	15.8277	ZCCHC24;MEF2C;INSIG1;EMP1;SPRY2;SOBP	tf_perturb	6
0.213194	HSF1 KD HUMAN GSE3697 CREEDSID GENE 782 UP	5/218	0.0105324	0.221966	3.97968	18.1207	KLF10;SULT1B1;RALA;TNFRSF12A;MEFV	tf_perturb	6
0.213889	STAT3 KD HUMAN GSE42979 CREEDSID GENE 2148 DOWN	6/309	0.0113272	0.231818	3.37081	15.1031	ADGRE1;TNFRSF12A;INSIG1;CCL2;SPRY2;ATP13A2	tf_perturb	6
0.214583	IRF9 OE HUMAN GSE50002 CREEDSID GENE 1654 UP	5/222	0.0113282	0.231818	3.90553	17.4986	LFNG;PIM1;ARAP2;EMP1;IRGM	tf_perturb	6
0.215278	IRF4 KO MOUSE GSE40726 CREEDSID GENE 1527 DOWN	5/223	0.0115334	0.232645	3.88742	17.3476	CD86;SMIM3;NCF1;LSP1;TNF	tf_perturb	6
01:01:00	PTM: gamma carboxylation, hypusine formation and arylsulfatase activation	2022-06-28	0.000198741	0.0605706	8.45629	72.0773	STS;F10;PROS1;FURIN;ARSD;GAS6	bioplanet	2_3
01:02:00	Alternative complement pathway	2022-04-11	0.000269689	0.0605706	17.675	145.258	CFD;C5;C8G;C8B	bioplanet	2_3
01:03:00	Gamma-carboxylation, transport, and amino-terminal cleavage of proteins	2022-04-11	0.000269689	0.0605706	17.675	145.258	F10;PROS1;FURIN;GAS6	bioplanet	2_3
01:04:00	Complement and coagulation cascades	1970-09-01	0.000337912	0.0605706	4.58755	36.667	CFD;C5;C8G;CR1;F10;PROS1;C8B;KLKB1;CD55	bioplanet	2_3
01:05:00	Plexin D1 signaling	2022-05-24	0.000788808	0.113115	8.14779	58.2159	SEMA4A;ITGA4;ITGA11;ITGA7;ITGA6	bioplanet	2_3
01:06:00	Terminal pathway of complement	2022-03-07	0.000990245	0.118334	23.1651	160.246	C5;C8G;C8B	bioplanet	2_3
02:01:00	SMAD4 CHEA	37/584	4.85298e-05	0.00495004	2.14708	21.3277	TMEM87B;NRP2;CPQ;NRXN3;ETFA;AOAH;ARHGAP15;TMEM163;STOX2;FAM83F;RPS6KA2;SYNPO;CD55;ANKS1B;JAG1;ITGA4;DST;TMEM132B;PDE4D;COL23A1;WDR75;UNC5C;FRMD4A;ARID1B;PLEKHA7;SUGCT;SLC22A23;FERMT1;TANC1;DAB1;ZNF438;CHI3L1;ITGA6;TLN2;KIZ;SHANK2;FBN1	encode_chea	2_3
02:02:00	AR CHEA	50/1095	0.0054843	0.188014	1.51171	7.86978	KCNG1;FAM49A;CPQ;TSEN15;CXORF21;C2ORF88;RASGRF1;ETFA;KYNU;PHACTR3;CSGALNACT1;USP8;PDE4D;FIBCD1;ANK2;NAV1;SLC22A23;GPRIN3;TIAM1;TANC1;MYO3B;TFEC;ALDH1A1;TLN2;KIZ;LYPLAL1;CFAP61;C15ORF41;AOAH;ADRB2;LY9;UGT8;PDZD2;KCNN2;SMYD3;MYH10;PMS1;RAB4A;JAG1;MTX2;NTRK3;ESRRB;DNAJC12;PML;ACVR2A;SUGCT;SDK1;UST;DMXL2;CNIH3	encode_chea	2_3
02:03:00	GATA1 CHEA	39/807	0.00552983	0.188014	1.59836	8.30765	SLC24A1;CEBPE;PRUNE2;ETFA;FURIN;ICAM5;LIPA;PIK3R6;AGPAT4;ADAMTS14;SH3TC2;RPS6KA2;ZNF846;VILL;ACVR1;RAB4A;SMAD3;RSAD2;ZBTB38;ZBTB16;PDE4D;FIBCD1;COL23A1;FRMD4A;HSPG2;ANK1;FAM210B;SLC22A23;TIAM1;TANC1;DAB1;CDK6;MYO3B;COL4A2;DDIT4;NOS1AP;TRIM58;CMPK2;MDGA1	encode_chea	2_3
03:01:00	extracellular matrix organization (GO:0030198)	27/300	1.08313e-06	0.00266125	3.1322	43.0228	VIT;PAPLN;HTRA1;FURIN;ICAM5;COL19A1;ADAMTS14;ADAMTS13;ADAMTS9;ELANE;GPM6B;ADAMTS6;ADAMTS7;COL28A1;ITGA4;DST;COL23A1;ADAM10;HSPG2;COL4A2;ITGA11;ITGA7;ITGA6;GAS6;MATN4;KLKB1;FBN1	gobp	2_3
03:02:00	extracellular structure organization (GO:0043062)	20/216	1.75262e-05	0.0153554	3.20743	35.1271	VIT;COL28A1;ITGA4;COL23A1;PAPLN;FURIN;ICAM5;HSPG2;COL19A1;ADAMTS14;ADAMTS13;COL4A2;ITGA11;ITGA7;ITGA6;MATN4;ADAMTS9;ADAMTS6;FBN1;ADAMTS7	gobp	2_3
03:03:00	external encapsulating structure organization (GO:0045229)	20/217	1.8749e-05	0.0153554	3.19098	34.7318	VIT;COL28A1;ITGA4;COL23A1;PAPLN;FURIN;ICAM5;HSPG2;COL19A1;ADAMTS14;ADAMTS13;COL4A2;ITGA11;ITGA7;ITGA6;MATN4;ADAMTS9;ADAMTS6;FBN1;ADAMTS7	gobp	2_3
03:04:00	mononuclear cell differentiation (GO:1903131)	2022-06-26	0.00012814	0.07871	9.30288	83.3761	CSF1R;IL31RA;PIR;IRF8;MT1G;GAS6	gobp	2_3
03:05:00	monocyte differentiation (GO:0030224)	2022-04-11	0.000269689	0.132525	17.675	145.258	CSF1R;IL31RA;PIR;MT1G	gobp	2_3
04:01:00	ZEB1 SIRNA CORNEA HUMAN GSE90489 RNASEQ DOWN	1972-12-01	2.34711e-06	0.00333684	6.24919	81.004	MT-ND6;MT-ATP6;KIAA1217;MT-ND4L;MT-ND4;MT-ND5;KIF5C;TNFSF10;MT-CO2;MT-ND2;MT-CYB;MT-ND3	tf_perturb	2_3
04:02:00	FLI1 KD HUMAN GSE27524 CREEDSID GENE 1605 UP	29/369	6.5895e-06	0.00333684	2.70074	32.22	RTN2;FAM114A1;RGS16;HTRA1;ADRB2;LIPA;THBS3;PDZD2;GPNMB;KIF5C;RPS6KA2;MICAL1;ACVR1;CHST7;SMAD3;ITGA4;ZBTB38;MTUS1;UNC5C;FRMD4A;CORO2B;FAP;COL4A2;BIN1;DDIT4;MAGED2;SEC24D;KIZ;FBN1	tf_perturb	2_3
04:03:00	SETDB1 KD THP1 HUMAN GSE103409 SGRNA6DAY7 RNASEQ DOWN	14/107	6.71057e-06	0.00333684	4.7109	56.1154	MT-ND6;CFD;MT-ND4;RNASET2;AZU1;MT-ND2;MT-ND3;MT-ND1;MT-ATP6;SLC6A8;MICAL1;MT-CO2;MT-CYB;ELANE	tf_perturb	2_3
04:04:00	SETDB1 KD THP1 HUMAN GSE103409 SGRNA9DAY7 RNASEQ DOWN	15/122	6.905e-06	0.00333684	4.39093	52.1786	MT-ND4L;MT-ND4;MT-ND5;AZU1;MT-ND2;RNASE2;MT-ND3;LYST;MT-ND1;MT-ATP6;SLC6A8;EMB;XAF1;MT-CYB;ELANE	tf_perturb	2_3
04:05:00	EZH2 SHRNA PROE HUMAN GSE59089 RNASEQ UP	27/349	1.80605e-05	0.00698221	2.64874	28.929	MT-ND6;CFD;MT-ND4L;MT-ND4;MT-ND5;MS4A3;GBA;CXCR4;MT-ND2;GNS;LYST;MT-ND1;MT-ATP6;APMAP;EMB;ELANE;GCA;ITGA4;AZU1;LYZ;ANK1;HSPG2;CKAP4;CHI3L1;MT-CO2;MNDA;MT-CYB	tf_perturb	2_3
04:06:00	GATA4 OE A549 HUMAN GSE85001 RNASEQ UP	1991-12-01	2.79713e-05	0.00812546	4.74155	49.712	MT-ND6;MT-ATP6;MT-ND5;MGST3;ALDH1A1;ADAM10;SLC4A11;ITGA6;IL6ST;MT-CYB;MT-ATP8;FSTL3	tf_perturb	2_3
04:07:00	SUZ12 SHRNA PROE HUMAN GSE59089 RNASEQ UP	22/261	2.94248e-05	0.00812546	2.8964	30.2201	MT-ND6;CFD;MT-ND4L;MT-ND4;MT-ND5;MS4A3;ITGA4;GLO1;TBC1D2B;AZU1;MT-ND2;CST7;ANK1;HSPG2;GNS;MT-ND1;MT-ATP6;APMAP;CHI3L1;MT-CO2;MT-CYB;ELANE	tf_perturb	2_3
04:08:00	ZXDC DEPLET MOUSE GSE45417 CREEDSID GENE 1257 DOWN	23/286	4.09324e-05	0.0098903	2.75281	27.8132	CX3CR1;MS4A3;RPP40;TWIST2;RNASE3;AOAH;RNASE2;PTPRH;ART3;SUGCT;PLAC8;LAMP5;POLA1;GJB2;CUX2;SLAMF8;ZNF658;EMB;RAB7B;SLC25A12;SAMD13;ELANE;LYPLAL1	tf_perturb	2_3
04:09:00	FOXO1 SIRNA HESC HUMAN GSE94036 RNASEQ UP	23/293	5.94441e-05	0.0121055	2.68046	26.0821	PRPS2;MT-ND4L;MT-ND4;MT-ND5;MBNL2;TWIST2;TBC1D2B;NAV1;MT-ND2;APCDD1;ADRA2C;MT-ND3;HSPG2;MT-ATP8;CKAP4;ASS1;MT-ND1;MT-ATP6;COL4A2;MT-CO2;IL6ST;MT-CYB;FBN1	tf_perturb	2_3
04:10:00	REST SHRNA C2 HUMAN GSE90068 PBPA RNASEQ DOWN	23/294	6.26254e-05	0.0121055	2.67043	25.8453	MT-ND4L;FARP1;MT-ND4;MT-ND5;MBNL2;SMAD3;DST;ZBTB38;TNFRSF19;ADAM10;MT-ND3;LYST;PTPN14;SDK1;GPNMB;FAP;COL4A2;ITGA11;ALDH1A1;MT-CO2;ITGA6;IL6ST;MT-CYB	tf_perturb	2_3
04:11:00	FLI1 KD HUMAN GSE27524 CREEDSID GENE 1601 UP	28/398	6.92152e-05	0.012163	2.38843	22.8771	OLFML2B;FAM114A1;RGS16;HTRA1;ADRB2;LIPA;THBS3;PDZD2;GPNMB;KIF5C;RPS6KA2;MICAL1;SYNPO;CSGALNACT1;SMAD3;ITGA4;RNASET2;MTUS1;UNC5C;FRMD4A;CORO2B;TPST1;FAP;COL4A2;DDIT4;DCHS1;MAGED2;FBN1	tf_perturb	2_3
04:12:00	NFIX KD MOUSE GSE45492 CREEDSID GENE 2846 UP	22/281	8.88345e-05	0.0143098	2.66995	24.9072	FAM49A;CX3CR1;CSF1R;RSAD2;PYHIN1;PROS1;IL31RA;TMEM51;LY9;TMEM163;PLAC8;MARCO;ZEB2;SLPI;KYNU;TRAF5;TMED3;CMPK2;IRF8;IL6ST;XAF1;ELANE	tf_perturb	2_3
04:13:00	FLI1 KD HUMAN GSE27524 CREEDSID GENE 1600 UP	27/386	0.00010214	0.0148684	2.37114	21.7888	OLFML2B;FAM114A1;RGS16;HTRA1;ADRB2;LIPA;THBS3;PDZD2;GPNMB;KIF5C;RPS6KA2;MICAL1;SYNPO;CSGALNACT1;SMAD3;ITGA4;RNASET2;MTUS1;FRMD4A;CORO2B;TPST1;FAP;COL4A2;DDIT4;DCHS1;MAGED2;FBN1	tf_perturb	2_3
04:14:00	FLI1 KD HUMAN GSE27524 CREEDSID GENE 1607 UP	24/325	0.000107686	0.0148684	2.509	22.9229	ACVR1;SMAD3;FAM114A1;ITGA4;ZBTB38;RGS16;MTUS1;HTRA1;UNC5C;FRMD4A;DNAJC15;LIPA;CORO2B;PDZD2;GPNMB;FAP;RPS6KA2;MICAL1;CTH;DDIT4;MAGED2;ITGA6;SEC24D;FBN1	tf_perturb	2_3
04:15:00	FLI1 KD HUMAN GSE27524 CREEDSID GENE 1598 UP	29/434	0.000127378	0.0155287	2.25955	20.2644	OLFML2B;FAM114A1;RGS16;HTRA1;LIPA;THBS3;PDZD2;KIF5C;RPS6KA2;MICAL1;SYNPO;CSGALNACT1;CHST7;SMAD3;ITGA4;ZBTB38;RNASET2;MTUS1;SHROOM2;FRMD4A;CORO2B;TPST1;FAP;COL4A2;DDIT4;ITGA6;MAGED2;IL6ST;FBN1	tf_perturb	2_3
04:16:00	SETDB1 KD THP1 HUMAN GSE103409 SGRNA9DAY4 RNASEQ DOWN	14/139	0.000128536	0.0155287	3.49909	31.3494	MT-ND4;MT-ND5;GLO1;AZU1;MT-ND2;RNASE2;ASS1;MT-ND1;MT-ATP6;SLC6A8;HYAL3;CHI3L1;MT-CYB;ELANE	tf_perturb	2_3
04:17:00	GATA6 OE HESC HUMAN GSE69322 MTESR1MEDIA RNASEQ UP	27/398	0.0001688	0.0191935	2.293	19.9188	MT-ND6;MT-ND4L;MT-ND4;MT-ND5;HTRA1;FURIN;MT-ND2;MT-ND1;MT-ATP6;PRTG;SYNPO;ADAMTS9;MYH10;CD276;FARP1;UNC5C;HSPG2;CKAP4;TANC1;CDK6;COL4A2;MT-CO2;DCHS1;MAGED2;IL6ST;MT-CYB;FBN1	tf_perturb	2_3
04:18:00	TP63 SIRNA KYSE70 HUMAN GSE47058 RNASEQ DOWN	1980-10-01	0.000202625	0.0202234	4.447	37.818	MT-ND6;MT-ATP6;MT-ND4;MT-ND5;JAG1;DST;MT-ND2;MT-CYB;MT-ND3;MT-ND1	tf_perturb	2_3
04:19:00	ZXDC DEPLETION HUMAN GSE45417 CREEDSID GENE 3044 UP	20/258	0.000209002	0.0202234	2.63562	22.3321	AOC1;MS4A3;RPP40;RNASE3;AZU1;RNASE2;PRSS12;TMEM163;ART3;PLAC8;LAMP5;POLA1;SLPI;ZNF280C;CXCR2;KCNN2;MNDA;EMB;SAMD13;ELANE	tf_perturb	2_3
04:20:00	CEBPA KO MOUSE GSE61468 CREEDSID GENE 1476 DOWN	21/278	0.000209243	0.0202234	2.56447	21.7262	VIT;CX3CR1;CSF1R;SEMA4A;MS4A3;GALNT3;PYHIN1;MTUS1;IL31RA;CXCR4;CKAP4;CAMSAP2;SLPI;RPS6KA2;TFEC;CXCR2;TMED3;IRF8;EMB;IL6ST;ELANE	tf_perturb	2_3
04:21:00	ASCL1 KO G523NS HUMAN GSE87615 RNASEQ UP	24/344	0.000253388	0.0204679	2.35767	19.5229	MT-ND6;MT-ND4L;MT-ND4;MT-ND5;HTRA1;SHROOM2;SLC1A3;FRMD4A;MT-ND2;MT-ND3;MT-ATP8;MT-ND1;MT-ATP6;SDK1;GJB2;DDIT4;CHN1;ITGA7;MT-CO2;MAGED2;IL6ST;MT-CYB;GPM6B;ATP9A	tf_perturb	2_3
04:22:00	EBF3 OE SKNSH HUMAN GSE90682 RNASEQ UP	23/324	0.000264218	0.0204679	2.40049	19.777	MT-ND6;NRXN2;MT-ND2;MAPK8IP2;SEZ6L2;MT-ND3;HSPG2;MT-ATP8;MT-ND1;THBS3;MT-ATP6;COL4A2;KIF5C;RPS6KA2;MICAL1;ITGA7;MT-CO2;DCHS1;MAGED2;NCAM1;MT-CYB;MYH10;FBN1	tf_perturb	2_3
04:23:00	MYC KO MOUSE GSE58079 CREEDSID GENE 2553 UP	20/263	0.000269143	0.0204679	2.58072	21.2142	FAM49A;NMB;ECM1;PYHIN1;RGS16;GBA;EPHX1;VWA5A;SLC4A11;SYP;RASGRP1;ACVR2A;KYNU;MAGED2;SMYD3;IL6ST;XAF1;CD55;ADAMTS6;HERC6	tf_perturb	2_3
04:24:00	NFKB1 OE HEK293 HUMAN GSE57027 RNASEQ UP	1968-09-01	0.000270732	0.0204679	4.74355	38.9654	MT-ND6;MT-ATP6;MT-ND4L;MT-ND4;MT-ND5;MT-CO2;MT-ND2;MT-CYB;MT-ND1	tf_perturb	2_3
04:25:00	GATA3 OE MDAMB231 HUMAN GSE72141 RNASEQ UP	20/264	0.000282841	0.0204679	2.57001	20.9986	MT-ND6;MT-ND4L;MT-ND4;MT-ND5;MBNL2;OAT;EPHX1;NAV1;FURIN;GNS;PLEKHA7;MT-ATP8;MT-ND1;KIAA1217;MT-ATP6;CREG1;MT-CO2;ITGA6;MELTF;MT-CYB	tf_perturb	2_3
04:26:00	STAT3 SIRNA MDAMB157 HUMAN GSE85579 RNASEQ DOWN	20/264	0.000282841	0.0204679	2.57001	20.9986	MT-ND6;MT-ND4L;MT-ND4;MT-ND5;HTRA1;NAV1;MT-ND2;GNS;PTPN14;MT-ND1;MT-ATP6;CDK6;COL4A2;ASPH;MT-CO2;DCHS1;MAGED2;IL6ST;MT-CYB;MYH10	tf_perturb	2_3
04:27:00	RORC KO MOUSE GSE27241 CREEDSID GENE 1686 UP	15/168	0.000285895	0.0204679	3.06345	24.9974	ECM1;PROS1;PYHIN1;RGS16;EPHX1;GBA;PRSS12;TMEM163;PLAC8;MYO3B;TBXA2R;CXCR2;SLC38A6;PIM2;GPM6B	tf_perturb	2_3
04:28:00	NEUROG1 OE HUMAN GSE18296 CREEDSID GENE 1426 DOWN	23/328	0.000314793	0.021653	2.36851	19.0987	MAGEH1;NRP2;FAM114A1;PROS1;PRUNE2;SLC1A3;ANK2;THBS3;KIAA1217;ADAMTS14;CDK6;FAP;ANPEP;MAP1A;DDIT4;ITGA11;TNFSF10;GSAP;SMYD3;GAS6;CNIH3;ADAMTS6;FBN1	tf_perturb	2_3
04:29:00	MECP2 KO MOUSE GSE8720 CREEDSID GENE 2417 UP	15/170	0.000324851	0.021653	3.0236	24.286	RAB4A;SMAD3;SLC24A3;ZBTB16;SHISA2;ANK1;FAM214A;SLC22A23;SDK1;C8G;COL4A2;KIFC3;CD302;SEC24D;NUP37	tf_perturb	2_3
04:30:00	FLI1 KD HUMAN GSE27524 CREEDSID GENE 1602 UP	23/333	0.000389843	0.0251189	2.3297	18.2876	DLX2;SMAD3;FAM114A1;ITGA4;ZBTB38;RGS16;MTUS1;HTRA1;UNC5C;FRMD4A;DNAJC15;LIPA;CORO2B;PDZD2;GPNMB;FAP;RPS6KA2;MICAL1;CTH;DDIT4;MAGED2;ITGA6;FBN1	tf_perturb	2_3
04:31:00	EPAS1 KD HUVEC HUMAN GSE62974 RNASEQ DOWN	20/272	0.000416214	0.0259529	2.48738	19.3625	MT-ND6;MT-ND4L;MT-ND4;MT-ND5;ATP8B2;MTUS1;HTRA1;FURIN;MT-ND2;CKAP4;MT-ND1;MT-ATP6;TNFSF10;MT-CO2;DCHS1;IL6ST;MT-CYB;CD55;CD276;FBN1	tf_perturb	2_3
04:32:00	SP140 KD PBMC HUMAN GSE83381 RNASEQ DOWN	26/403	0.000478325	0.0276908	2.16865	16.5798	MT-ND6;MT-ND4;MT-ND5;GBA;MT-ND2;GNS;MT-ND1;HERC5;MT-ATP6;GPNMB;ANPEP;MICAL1;CREG1;KYNU;CIR1;SEMA4A;RSAD2;RIPK2;ZEB2;FMNL2;DMXL2;CMPK2;CHI3L1;MT-CO2;MT-CYB;HLA-DRB1	tf_perturb	2_3
04:33:00	EZH1 SHRNA PROE HUMAN GSE59089 RNASEQ UP	29/470	0.000479785	0.0276908	2.07116	15.8281	MT-ND6;CFD;MT-ND4L;MT-ND4;MT-ND5;MS4A3;CXCR4;MT-ND2;LYST;MT-ND1;MT-ATP6;APMAP;ANPEP;CREG1;EMB;ELANE;ITGA4;GCA;VWA5A;ADAM10;AZU1;ZEB2;CDK6;SLC7A8;TFEC;CHI3L1;MT-CO2;MNDA;MT-CYB	tf_perturb	2_3
04:34:00	NKX25 SHRNA H1 HUMAN GSE69618 DAY2 RNASEQ DOWN	1959-08-01	0.000498585	0.0276908	4.87208	37.046	MT-ND4L;MT-ND4;MT-ND5;MT-CO2;MT-ND2;MT-ND3;MT-ATP8;MT-ND1	tf_perturb	2_3
04:35:00	STAT1 KO MOUSE GSE48970 CREEDSID GENE 1519 DOWN	20/276	0.000501385	0.0276908	2.448	18.6003	PCYT1B;RSAD2;GCA;CPQ;PYHIN1;EPHX1;FRMD4A;MERTK;ARHGAP24;PML;TPST1;TMEM67;TNFSF10;TMCC3;CMPK2;MNDA;GAS6;XAF1;CD55;HERC6	tf_perturb	2_3
04:36:00	FLI1 KD HUMAN GSE27524 CREEDSID GENE 1604 UP	23/340	0.000521082	0.0279792	2.27742	17.2164	SMAD3;FAM114A1;ITGA4;ZBTB38;RGS16;MTUS1;HTRA1;SHROOM2;UNC5C;FRMD4A;DNAJC15;LIPA;CORO2B;PDZD2;GPNMB;FAP;RPS6KA2;MICAL1;CTH;DDIT4;MAGED2;ITGA6;FBN1	tf_perturb	2_3
04:37:00	AHR MUT MOUSE GSE44715 CREEDSID GENE 1467 DOWN	18/238	0.000571293	0.0298462	2.56016	19.1183	TMEM185B;CX3CR1;GLO1;VWA5A;AATK;SHISA2;ANK1;FAM214A;SULT1A1;FAM210B;ALDH3A2;ZXDA;TIAM1;GPR176;ARHGAP20;SLC6A8;ANPEP;EMB	tf_perturb	2_3
04:38:00	ZNF589 SIRNA BT549 HUMAN GSE79586 RNASEQ DOWN	1992-10-01	0.000633564	0.0322284	3.79386	27.9386	MT-ND6;MT-ATP6;MT-ND4L;MT-ND4;MT-ND5;OAT;GLO1;DDIT4;MT-CYB;MT-ND1	tf_perturb	2_3
04:39:00	HSF1 KD HUMAN GSE3697 CREEDSID GENE 783 DOWN	22/330	0.00082816	0.0406722	2.23943	15.8917	FARP1;NMB;PROS1;ZBTB38;PLCL1;PRUNE2;MTUS1;WFDC1;CKAP4;PLAC8;ALDH3A2;UGT8;DPM3;SLPI;GSTA4;ASPH;FBXO4;RBM41;B9D1;PPARGC1A;GPM6B;ATP9A	tf_perturb	2_3
04:40:00	TSHZ3 SIRNA MCF7 HUMAN GSE79586 RNASEQ DOWN	12/130	0.00084164	0.0406722	3.16801	22.43	MT-ND6;MT-ATP6;MT-ND4L;MT-ND4;MT-ND5;KYNU;MT-CO2;MT-ND2;MT-CYB;MT-ND3;GNS;MT-ATP8	tf_perturb	2_3
04:41:00	FLI1 KD HUMAN GSE27524 CREEDSID GENE 1612 UP	20/289	0.000890948	0.042005	2.32811	16.3509	DLX2;SMAD3;FAM114A1;ITGA4;ZBTB38;RGS16;MTUS1;UNC5C;FRMD4A;DNAJC15;LIPA;GPNMB;FAP;RPS6KA2;MICAL1;CTH;DDIT4;PIR;ITGA6;FBN1	tf_perturb	2_3
04:42:00	EZH2 SHRNA HUVEC HUMAN GSE71164 SHEARSTRESS RNASEQ DOWN	18/248	0.000921863	0.0424276	2.44757	17.1063	MT-ND6;MT-ND4;MT-ND5;JAG1;DST;HSPG2;GNS;MT-ATP8;MT-ATP6;COL4A2;ANPEP;MT-CO2;DCHS1;MAGED2;MT-CYB;ADAMTS9;FBN1;ADAMTS7	tf_perturb	2_3
04:43:00	HSF1 KD HUMAN GSE3697 CREEDSID GENE 782 DOWN	24/379	0.00100572	0.0452106	2.12132	14.6415	FARP1;WHRN;ZBTB38;PLCL1;ENTPD6;PRUNE2;EPHX1;MTUS1;WFDC1;KAZN;DNAJC12;HSPG2;PLAC8;ALDH3A2;UGT8;DPM3;PDZD2;SLPI;GSTA4;CPS1;B9D1;PPARGC1A;GPM6B;ATP9A	tf_perturb	2_3
04:44:00	BACH2 KO MOUSE GSE30883 CREEDSID GENE 2701 DOWN	17/233	0.00119425	0.0516343	2.4592	16.551	KCNG1;SMAD3;PTAFR;EPHX1;TNFRSF19;CXCR4;CASD1;TMEM163;AGPAT4;ERN1;TBXA2R;KYNU;UST;TMED3;CMPK2;EMB;PIM2	tf_perturb	2_3
04:45:00	BACH2 KO MOUSE GSE54050 CREEDSID GENE 2773 UP	24/384	0.00120204	0.0516343	2.09131	14.0614	ECM1;RSAD2;CEBPE;DAPK2;PTAFR;HTRA1;AOAH;HNMT;ADRA2C;RASGRP1;CAMKK1;CKAP4;ASS1;GPR176;SLC6A8;GPNMB;COL4A2;RILPL1;ANPEP;C1QTNF6;SLAMF8;CMPK2;GAS6;ZBTB7C	tf_perturb	2_3
04:46:00	FLI1 KD HUMAN GSE27524 CREEDSID GENE 1611 UP	20/297	0.00124207	0.0521938	2.25993	15.1211	DLX2;SMAD3;FAM114A1;ITGA4;ZBTB38;RGS16;MTUS1;UNC5C;FRMD4A;DNAJC15;LIPA;GPNMB;FAP;RPS6KA2;MICAL1;CTH;DDIT4;PIR;ITGA6;FBN1	tf_perturb	2_3
04:47:00	PGR SIRNA HESC HUMAN GSE94036 RNASEQ UP	15/194	0.0012812	0.0526929	2.61493	17.4153	MT-ND6;MT-ND4L;MT-ND4;MBNL2;GBA;TWIST2;MT-ND2;ADRA2C;MT-ND3;CKAP4;MT-ND1;MT-ATP6;C1QTNF6;MT-CYB;CD276	tf_perturb	2_3
04:48:00	ETV2 OE HESC HUMAN GSE57395 RNASEQ DOWN	10/101	0.00131224	0.052845	3.41705	22.6756	MT-ND6;MT-ATP6;MT-ND4;MT-ND5;SLC6A8;DDIT4;MT-CO2;PIM2;MT-ND2;MT-ND1	tf_perturb	2_3
04:49:00	FLI1 KD HUMAN GSE27524 CREEDSID GENE 1608 UP	20/300	0.00140127	0.054653	2.23536	14.6872	DLX2;SMAD3;FAM114A1;ITGA4;ZBTB38;RGS16;MTUS1;UNC5C;FRMD4A;DNAJC15;LIPA;GPNMB;FAP;RPS6KA2;MICAL1;CTH;DDIT4;PIR;ITGA6;FBN1	tf_perturb	2_3
04:50:00	MYB OE HUMAN GSE2816 CREEDSID GENE 2154 UP	11/120	0.00144644	0.054653	3.14018	20.5325	RAB32;PLAC8;MT-ATP6;MT-ND4;RIPK2;IRF8;CXCR4;MT-CO2;MT-ND2;MT-ND3;CD55	tf_perturb	2_3
04:51:00	TWIST1 OE MOUSE GSE50002 CREEDSID GENE 1071 UP	20/301	0.00145806	0.054653	2.22729	14.5457	CPM;ECM1;RSAD2;CPQ;PYHIN1;VWA5A;FURIN;ADRB2;GNS;AGT;NRBP2;GPNMB;CREG1;DDIT4;TNFSF10;GSAP;MNDA;IL6ST;XAF1;HERC6	tf_perturb	2_3
04:52:00	FOXP3 DEFICIENCY MOUSE GSE35543 CREEDSID GENE 3037 DOWN	21/323	0.00147023	0.054653	2.17721	14.2005	CSGALNACT1;MAGEH1;CPM;ECM1;SLC24A3;DST;WHRN;RGS16;EPHX1;TMEM51;DNAJC12;FAH;AGPAT4;NRBP2;GJB2;ARHGAP20;MYO3B;TNFSF10;IRF8;XAF1;ADAMTS6	tf_perturb	2_3
04:53:00	FLI1 KD HUMAN GSE27524 CREEDSID GENE 1609 UP	20/302	0.0015168	0.0553203	2.21928	14.4057	DLX2;SMAD3;FAM114A1;ITGA4;ZBTB38;RGS16;MTUS1;UNC5C;FRMD4A;DNAJC15;LIPA;GPNMB;FAP;RPS6KA2;MICAL1;CTH;DDIT4;PIR;ITGA6;FBN1	tf_perturb	2_3
04:54:00	PPARG OE MOUSE GSE10192 CREEDSID GENE 2733 UP	14/178	0.00156172	0.0557948	2.66159	17.1991	ECM1;OLFML2B;CHST7;PCOLCE2;MGST3;EBF1;AGT;SULT1A1;GJB2;FAP;GSTA4;RAB9A;IL17D;GPM6B	tf_perturb	2_3
04:55:00	MYC OE MCF7 HUMAN GSE101738 RNASEQ DOWN	13/159	0.00160302	0.0557948	2.77427	17.8548	MT-ND6;MT-ND4L;CPM;MT-ND4;MT-ND5;RGS16;UTP23;MT-ND2;MT-ND1;MT-ATP6;KYNU;MT-CO2;MT-CYB	tf_perturb	2_3
04:56:00	TWIST1 OE MOUSE GSE50002 CREEDSID GENE 3025 DOWN	19/282	0.0016164	0.0557948	2.25917	14.5209	CPM;NMB;VWA5A;FAH;KIAA1217;ALDH3A2;GPNMB;GSTA4;KIF5C;CREG1;CTH;DDIT4;CAPN5;TNFSF10;GSAP;REEP6;IL6ST;ADAMTS9;PDK1	tf_perturb	2_3
04:57:00	REST SHRNA C2 HUMAN GSE90068 PBPA RNASEQ UP	20/306	0.00177234	0.0601042	2.18778	13.8606	MT-ND6;OLFML2B;HTRA1;SLC1A3;NAV1;MT-ND2;APCDD1;GNS;PRSS12;ASS1;MT-ND1;MT-ATP6;ALDH3A2;GJB2;STS;ASPH;ANPEP;CREG1;ITGA7;SERINC2	tf_perturb	2_3
04:58:00	USF1 OE HUMAN GSE17300 CREEDSID GENE 2973 UP	23/374	0.00185594	0.0610773	2.05315	12.913	CFD;DLX1;CHST7;PCOLCE2;RNASET2;ZDHHC11;SHISA2;FAM214A;ASS1;HERC5;FERMT1;TRIM9;STOX2;GPR176;STS;GAL;BIN1;TMCC3;CRYL1;ITGA6;PIM2;VILL;MYH10	tf_perturb	2_3
04:59:00	MITF KD 501MEL HUMAN GSE61966 RNASEQ DOWN	16/222	0.00186423	0.0610773	2.42421	15.2359	MT-ND6;ECM1;MT-ND5;JAG1;GBA;TNFRSF19;MT-ND2;MT-ND1;MT-ATP6;GPNMB;MICAL1;ITGA7;MT-CO2;MT-CYB;PPARGC1A;MYH10	tf_perturb	2_3
0.208333	EZH2 SHRNA HUVEC HUMAN GSE71164 RNASEQ DOWN	22/353	0.00195673	0.0620668	2.0813	12.98	MT-ND4;MT-ND5;YES1;JAG1;SMAD3;FAM114A1;DST;CXCR4;TBC1D9;NAV1;FURIN;HSPG2;PTPN14;TMEM263;MT-ATP6;COL4A2;ANPEP;MT-CO2;IL6ST;MT-CYB;SEC24D;CD55	tf_perturb	2_3
0.209028	FOXP3 ACTIVATION HUMAN GSE41087 CREEDSID GENE 1055 UP	17/244	0.00195865	0.0620668	2.33869	14.5829	NRP2;RSAD2;RNASET2;PRUNE2;DNAJC12;LYZ;SOCS2;GNA15;ANPEP;KYNU;MT1G;CMPK2;CHI3L1;GSAP;XAF1;CES3;FBN1	tf_perturb	2_3
0.209722	TWIST2 MUT N HUMAN GSE16524 CREEDSID GENE 2262 DOWN	15/203	0.0020046	0.0624982	2.48858	15.4599	MT-ND4;NMB;RSAD2;TWIST2;HTRA1;MT-ND2;APCDD1;MT-ND3;MT-ATP6;GPNMB;MPC2;DDIT4;CHN1;CMPK2;MT-CO2	tf_perturb	2_3
0.210417	FOXO1 KO MOUSE GSE40655 CREEDSID GENE 508 DOWN	13/165	0.00222964	0.0684111	2.66393	16.2657	FAM49A;ITGA4;PROS1;EPHX1;ADRB2;TTC28;GSTA4;ITGA6;EMB;IL6ST;GPR155;ADAMTS6;CD55	tf_perturb	2_3
0.211111	HSF1 KD HUMAN GSE3697 CREEDSID GENE 784 DOWN	21/336	0.00236927	0.0715594	2.08593	12.6098	CFD;OFD1;FARP1;NMB;ZNF185;PRUNE2;VWA5A;WFDC1;KAZN;SUGCT;PLAC8;UGT8;DPM3;PDZD2;SLPI;GPNMB;ANPEP;FBXO4;B9D1;ST6GALNAC4;ATP9A	tf_perturb	2_3
0.211806	OVOL2 OE PC3 HUMAN GSE48230 RNASEQ UP	15/207	0.00242101	0.0718712	2.43623	14.6748	MT-ND6;MT-ND4L;MT-ND4;MT-ND5;SMAD3;DST;MT-ND2;MT-ND3;HSPG2;MT-ATP8;MT-ND1;MT-ATP6;SLPI;MT-CO2;ATP9A	tf_perturb	2_3
0.2125	HSF1 KD HUMAN GSE12762 CREEDSID GENE 2142 UP	18/271	0.00247267	0.0718712	2.22239	13.3398	TMEM87B;RIPK2;ZBTB38;LIPA;FAM214A;GTF2H5;DTWD1;C5;CDK6;CTH;FBXO4;SLC38A6;IL6ST;LYPLAL1;GALK2;ADCY10P1;PPP4R1L;NUP37	tf_perturb	2_3
0.213194	FLI1 KD HUMAN GSE27524 CREEDSID GENE 1595 UP	19/293	0.00249114	0.0718712	2.16723	12.9926	DLX2;SMAD3;FAM114A1;ITGA4;ZBTB38;RGS16;UNC5C;FRMD4A;DNAJC15;GPNMB;FAP;RPS6KA2;MICAL1;CTH;DDIT4;PIR;ITGA6;GPM6B;FBN1	tf_perturb	2_3
0.213889	ERG OE CD34 HUMAN GSE53665 RNASEQ UP	21/338	0.00254214	0.072264	2.07256	12.383	MT-ND6;MT-ND4L;CSF1R;MT-ND4;MT-ND5;ADAM10;NAV1;FURIN;MT-ND2;LYST;MT-ND1;SLC7A8;ASPH;BIN1;ANPEP;TFEC;IRF8;MT-CO2;EMB;RAB7B;MT-CYB	tf_perturb	2_3
0.214583	PRDM14 KO MOUSE GSE45507 CREEDSID GENE 3106 UP	15/209	0.00265467	0.0743693	2.41086	14.2999	MAP10;OAT;MGST3;GLO1;SLC1A3;NAV1;FAH;ANK1;TMEM263;AGPAT4;SCCPDH;TCEA3;PLIN3;PDK1;CD276	tf_perturb	2_3
0.215278	HIF1A OE 786O HUMAN GSE67237 RNASEQ UP	22/363	0.00275597	0.076104	2.01921	11.9012	MT-ND6;MT-ND4L;MT-ND4;MT-ND5;OAT;SMAD3;FAM114A1;DST;RNASET2;HTRA1;HSPG2;MT-ATP8;TMEM263;CKAP4;FSTL3;GPR176;COL4A2;ASPH;DDIT4;TNFSF10;MAGED2;SYNPO	tf_perturb	2_3
0.215972	ZXDC KD HUMAN GSE45417 CREEDSID GENE 885 DOWN	21/341	0.0028213	0.076811	2.0528	12.0511	CX3CR1;CSF1R;MS4A3;RSAD2;PLCL1;PTAFR;SHISA2;PTPRH;ABCA13;ART3;SUGCT;PLAC8;POLA1;GJB2;ZNF280C;ZNF658;EMB;CD302;RAB7B;SAMD13;LYPLAL1	tf_perturb	2_3
0.216667	DOT1L INHIBITION HUMAN GSE29828 CREEDSID GENE 1239 UP	16/234	0.00315781	0.084088	2.28933	13.1817	MT-ND4;MS4A3;CXCR4;MT-ND2;LYZ;MT-ND3;PLAC8;MT-ATP6;SLPI;MICAL1;LINC00926;MT1G;CHI3L1;MT-CO2;MNDA;ELANE	tf_perturb	2_3
0.217361	ZEB2 SHRNA H1 HUMAN GSE69618 DAY10 RNASEQ DOWN	17/256	0.00322353	0.084088	2.21987	12.736	MT-ND6;MT-ND5;DST;NAV1;MT-ND2;MT-ND3;HSPG2;MT-ATP8;MT-ND1;MT-ATP6;PRTG;SDK1;ASPH;KYNU;TLN2;MT-CYB;ADAMTS9	tf_perturb	2_3
0.218056	GATA6 KD H1 HUMAN GSE92581 RNASEQ DOWN	18/278	0.00324575	0.084088	2.16176	12.3878	MT-ND6;MT-TP;MT-ND4;MT-ND5;JAG1;DST;PROS1;MT-ND2;MT-ND3;MT-ATP8;MT-ND1;MT-ATP6;ALDH3A2;ASPH;BIN1;ALDH1A1;TLN2;MT-CYB	tf_perturb	2_3
0.21875	FOXQ1 OE SKMEL147 HUMAN GSE103071 RNASEQ DOWN	1962-07-01	0.0032626	0.084088	3.94586	22.591	MT-ATP6;MT-ND4;MT-ND5;MT-CO2;MT-CYB;MT-ND3;MT-ND1	tf_perturb	2_3
0.219444	MAF OE MACROPHAGE HUMAN GSE98368 RNASEQ DOWN	1933-05-01	0.00348817	0.0887188	5.52629	31.2698	MT-ATP6;GPNMB;MT1G;LYZ;HLA-DRB1	tf_perturb	2_3
0.220139	PPARG OE MOUSE GSE10192 CREEDSID GENE 2731 DOWN	16/237	0.00357701	0.089797	2.2579	12.7193	OLFML2B;DAPK2;RGS16;TNFRSF19;PTPRVP;NMNAT2;ARHGAP24;SOCS2;GPR176;FAP;TNN;P2RY2;EMB;MYH10;MDGA1;LYPLAL1	tf_perturb	2_3
0.220833	SOX2 KO HUMAN GSE59234 CREEDSID GENE 2957 UP	17/259	0.00362826	0.0899157	2.19201	12.3169	MBNL2;SLC24A3;PDE4D;EBF1;SHISA2;DNAJC15;FAM214A;ASS1;GPRIN3;PRTG;C5;SLC7A8;ZNF846;CHI3L1;NCAM1;TLN2;ADAMTS6	tf_perturb	2_3
0.221528	NFE2L2 KO MOUSE GSE18344 CREEDSID GENE 964 UP	12/155	0.00373739	0.089997	2.61077	14.5925	JAG1;FMNL2;RSAD2;TNN;ZBTB16;RGS16;SLAMF8;MNDA;XAF1;ADAMTS9;GPR155;HERC6	tf_perturb	2_3
0.222222	FOXA1 KD HUMAN GSE25315 CREEDSID GENE 2164 UP	18/282	0.00377121	0.089997	2.12857	11.8782	ZNF185;MGST3;RGS16;EPHX1;SNHG8;SHISA2;GNS;FAM214A;ASS1;THBS3;RAB40B;GPNMB;DDIT4;TNFSF10;RAB9A;PYROXD2;HIST1H3I;CDH26	tf_perturb	2_3
0.222917	PAX7 OE H9 HUMAN GSE98976 MESOD RNASEQ UP	18/282	0.00377121	0.089997	2.12857	11.8782	TMEM87B;YES1;ADAM10;NMNAT2;MT-ND2;MT-ND3;GNS;MT-ATP8;MT-ND1;AGPAT4;MT-ATP6;CDK6;COL4A2;MT-CO2;MAGED2;IL6ST;MT-CYB;FBN1	tf_perturb	2_3
0.223611	PBRM1 OE CAKI2 HUMAN GSE76199 RNASEQ DOWN	23/398	0.0040253	0.0948891	1.91932	10.5853	MT-ND6;MT-ND4L;MT-ND4;MT-ND5;JAG1;DST;OLA1;NAV1;EIF2AK4;SHISA2;MT-ND2;MT-ND3;HSPG2;GNS;MT-ND1;CAMSAP2;MT-ATP6;CDK6;COL4A2;MT-CO2;MT-CYB;ATP9A;CD276	tf_perturb	2_3
0.224306	HSF1 KD HUMAN GSE3697 CREEDSID GENE 781 DOWN	24/422	0.00408596	0.0951585	1.88786	10.3836	CPM;MBNL2;PROS1;PLCL1;PRUNE2;MTUS1;NBPF20;WFDC1;CKAP4;PLAC8;ALDH3A2;UGT8;PDZD2;SLPI;GSTA4;CPS1;SCRN3;RBM41;SLC38A6;IL6ST;PPARGC1A;MYH10;ATP9A;GPM6B	tf_perturb	2_3
0.225	BACH2 KO MOUSE GSE30883 CREEDSID GENE 2701 UP	18/285	0.00420992	0.0968783	2.10432	11.5113	CPM;GCA;ZFAND4;ZBTB38;PRUNE2;ATP2B2;CST7;DNAJC15;CORO2B;SCCPDH;SLPI;RILPL1;RPS6KA2;CAPN5;PIR;ITGA6;IL6ST;SEC24D	tf_perturb	2_3
0.225694	EGR3 KD HUMAN GSE52108 CREEDSID GENE 2231 UP	15/221	0.00448015	0.101884	2.269	12.271	ITGA4;TMEM255B;FIBCD1;SHISA2;ASS1;PLAC8;TIAM1;UGT8;GJB2;DPM3;ZNF280C;TCEA3;VILL;REEP6;RAB7B	tf_perturb	2_3
0.226389	FLI1 KD HUMAN GSE27524 CREEDSID GENE 1594 UP	19/313	0.00509715	0.111141	2.01768	10.6515	RTN2;FAM114A1;ITGA4;RGS16;MTUS1;UNC5C;FRMD4A;ADRB2;PDZD2;GPNMB;FAP;KIF5C;RPS6KA2;MICAL1;CTH;DDIT4;MAGED2;KIZ;FBN1	tf_perturb	2_3
0.227083	MYB KD HUMAN GSE49286 CREEDSID GENE 1842 UP	17/268	0.0051012	0.111141	2.11242	11.1499	SHC4;CHST7;GBA;DNAJC12;PTPRH;AGPAT4;THBS3;FAM210B;C5;IMMP2L;FCGR2A;GSTA4;DDIT4;B9D1;HIST1H3I;SMYD3;ATP9A	tf_perturb	2_3
0.227778	E2F8 KO MOUSE GSE52157 CREEDSID GENE 2828 DOWN	23/406	0.00510795	0.111141	1.87844	9.91243	FAM49A;ERO1B;CSF1R;CPM;PYHIN1;EPHX1;PDE3B;EBF1;SLC50A1;MERTK;ARHGAP15;LIPA;GNS;RASGRP1;PLAC8;SLC7A8;ANPEP;KYNU;ALDH1A1;IRF8;IL6ST;XAF1;RAPGEF4	tf_perturb	2_3
0.228472	ZBTB7A KO MOUSE GSE41839 CREEDSID GENE 2380 DOWN	16/246	0.00511722	0.111141	2.16853	11.4393	CSGALNACT1;MAGEH1;OLFML2B;GCA;EPHX1;WWP1;MERTK;ABCA13;SULT1A1;IMMP2L;SLC7A8;COL4A2;DMXL2;PKP4;BLVRA;EXPH5	tf_perturb	2_3
0.229167	KMT2A KO MOUSE GSE24964 CREEDSID GENE 3009 DOWN	18/293	0.00558929	0.120045	2.04225	10.5929	RSAD2;PCOLCE2;CPQ;PYHIN1;PROS1;EPHX1;EBF1;SLC50A1;LIPA;GNS;PTPN14;AGT;SCRN3;MNDA;IL6ST;XAF1;GALK2;HERC6	tf_perturb	2_3
0.229861	GATA6 OE HESC HUMAN GSE69322 KSRMEDIA RNASEQ UP	11/144	0.00594592	0.126302	2.57032	13.173	MT-ND6;MT-ATP6;FARP1;MT-ND4;COL4A2;MT-CO2;MT-ND2;MT-CYB;MT-ND3;HSPG2;MT-ND1	tf_perturb	2_3
0.230556	IKZF1 KO MOUSE GSE46093 CREEDSID GENE 2547 UP	21/367	0.00650358	0.136646	1.89595	9.54689	FAM49A;NMB;RSAD2;PROS1;PLCL1;EPHX1;FRMD4A;SNX33;CORO2B;PTPN14;SOCS2;HHAT;ASPH;TBXA2R;DDIT4;CMPK2;GSAP;ITGA6;IL6ST;XAF1;MYH10	tf_perturb	2_3
0.23125	TWIST1 OE MOUSE GSE50002 CREEDSID GENE 1078 UP	21/368	0.00670053	0.138578	1.89039	9.46248	ERO1B;RSAD2;CPQ;VWA5A;FAH;LIPA;SULT1A1;NRBP2;GPNMB;KIF5C;CREG1;CTH;DDIT4;TNFSF10;PLIN3;GSAP;MNDA;REEP6;IL6ST;XAF1;HERC6	tf_perturb	2_3
0.231944	FOXP3 INDUCTION MOUSE GSE35543 CREEDSID GENE 3036 UP	12/167	0.00673893	0.138578	2.40714	12.0354	PLAC8;CSF1R;MARCO;SEMA4A;SLPI;CPNE4;TBXA2R;PDE3B;NAV1;MERTK;CD55;PDK1	tf_perturb	2_3
0.232639	FOXP3 ACTIVATION HUMAN GSE41087 CREEDSID GENE 1054 DOWN	17/277	0.00703007	0.141199	2.03834	10.1052	JAG1;GALNT3;PYHIN1;ZBTB16;PLCL1;CXCR4;LYZ;PLAC8;ERN1;PCNX2;IRAK2;DDIT4;CHI3L1;IL6ST;GPR155;PDK1;FBN1	tf_perturb	2_3
0.233333	MYC OE MOUSE GSE55272 CREEDSID GENE 1824 DOWN	19/323	0.0070687	0.141199	1.95029	9.65797	CFD;SLC24A3;PPM1M;PYHIN1;PDE3B;SLC1A3;AOAH;ADRB2;APCDD1;FAH;TRHDE;POLA1;STRIP2;GPNMB;APMAP;CXCR2;MNDA;CD302;ADAMTS9	tf_perturb	2_3
0.234028	PHF20 SHRNA H1792 HUMAN GSE82115 RNASEQ UP	9/108	0.00710484	0.141199	2.82111	13.956	MT-ND6;RAB32;MT-ND4L;MT-ND4;MT-ND5;HTRA1;MT-ND2;MT-ND1;FBN1	tf_perturb	2_3
0.234722	MYC KD MOUSE GSE30323 CREEDSID GENE 2609 UP	16/255	0.00715855	0.141199	2.08589	10.3031	CSGALNACT1;SLC45A3;SLC24A3;SOWAHC;DNAJC12;NAV1;NRBP2;ARHGAP20;GPNMB;GSTA4;COL4A2;TCEA3;EMB;SYNPO;PDE8A;ADAMTS9	tf_perturb	2_3
0.235417	PAX7 OE H9 HUMAN GSE98976 PROLIFMYOG RNASEQ UP	22/395	0.00736982	0.143898	1.84287	9.04917	MT-ND5;OLFML2B;ADAM10;MT-ND2;HSPG2;GNS;CKAP4;MT-ND1;AGPAT4;THBS3;CDK6;ASPH;COL4A2;MT-CO2;DCHS1;MAGED2;IL6ST;MT-CYB;ADAMTS9;MYH10;ATP9A;FBN1	tf_perturb	2_3
0.236111	DNMT1 KO MOUSE GSE31626 CREEDSID GENE 1236 DOWN	19/325	0.00752909	0.145537	1.93734	9.4716	CSF1R;MS4A3;F10;PYHIN1;CXCR4;ATP5MC3;HNMT;COX5A;CKAP4;ZEB2;SLPI;MICAL1;MPC2;TFEC;TMED3;IRF8;NCAM1;VILL;ELANE	tf_perturb	2_3
0.236806	CEBPG KO MOUSE GSE47777 CREEDSID GENE 3104 UP	19/330	0.00878707	0.167728	1.90569	9.02244	CFD;ANKRD28;DLX2;CHST7;RGS16;DNAJC12;KRT10;SLC22A23;RAB32;MARCO;DTWD1;GPNMB;GSTA4;CREG1;DMXL2;ALDH1A1;PIR;ITGA6;CD55	tf_perturb	2_3
0.2375	HNF4G OE LNCAP HUMAN GSE85557 RNASEQ DOWN	16/261	0.00885063	0.167728	2.03417	9.61606	FARP1;PTPN18;MT-ND5;TNFRSF19;ETFA;SEZ6L2;GNS;MT-ND1;MT-ATP6;ALDH3A2;TANC1;DAB1;ASPH;EMB;MT-CYB;MYH10	tf_perturb	2_3
0.238194	HSF1 KD HUMAN GSE3697 CREEDSID GENE 2093 DOWN	22/403	0.00919775	0.171063	1.80342	8.45586	MBNL2;FAM114A1;ZBTB38;PDE4D;PRUNE2;MTUS1;NBPF20;WFDC1;PTPN14;CKAP4;ALDH3A2;UGT8;PDZD2;ASPH;SLPI;SCRN3;ANPEP;DDIT4;RBM41;SLC38A6;IL6ST;MYH10	tf_perturb	2_3
0.238889	POU1F1 MUT MOUSE GSE3129 CREEDSID GENE 1729 UP	17/285	0.00920358	0.171063	1.97666	9.26691	OAT;MGST3;RGS16;EPHX1;WDR61;ETFA;FURIN;FAH;AGT;ALDH3A2;GSTA4;CPS1;CREG1;MPC2;ALDH1A1;RAB9A;REEP6	tf_perturb	2_3
0.239583	HMGA2 KD HUMAN GSE43741 CREEDSID GENE 2854 DOWN	13/196	0.00941231	0.173276	2.20909	10.3071	FAM49A;JAG1;FAM114A1;TMEM255B;GALNT3;CORO2B;KIAA1217;KYNU;TCEA3;TNFSF10;XAF1;SERINC2;SHANK2	tf_perturb	2_3
0.240278	OVOL1 OE MDA HUMAN GSE51975 RNASEQ DOWN	16/265	0.0101457	0.184009	2.00107	9.18634	FARP1;MT-ND4;ADAM10;MT-ND2;MT-ND3;PLEKHA7;MT-ND1;MT-ATP6;APMAP;COL4A2;MT-CO2;PKP4;KIFC3;MELTF;GAS6;CD55	tf_perturb	2_3
0.240972	FLI1 KD HUMAN GSE27524 CREEDSID GENE 1596 UP	19/335	0.0102092	0.184009	1.87504	8.59608	CSGALNACT1;FAM114A1;ITGA4;RGS16;MTUS1;HTRA1;FRMD4A;ADRB2;PDZD2;GPNMB;FAP;KIF5C;MICAL1;DDIT4;DCHS1;MAGED2;SYNPO;KIZ;FBN1	tf_perturb	2_3
0.241667	FLI1 KD HUMAN GSE27524 CREEDSID GENE 1597 UP	20/359	0.0102809	0.184009	1.84061	8.42534	CSGALNACT1;OLFML2B;FAM114A1;ITGA4;RGS16;MTUS1;HTRA1;PRSS12;CORO2B;PDZD2;GPNMB;FAP;KIF5C;MICAL1;DDIT4;DCHS1;MAGED2;SYNPO;IL6ST;FBN1	tf_perturb	2_3
0.242361	RORA KO MOUSE GSE23736 CREEDSID GENE 1154 UP	9/115	0.0105436	0.184185	2.63385	11.9899	MT-ND4L;STS;FGL1;CTH;DNAJC12;MT-CO2;C8B;AGT;ASS1	tf_perturb	2_3
0.243056	SETDB1 KD THP1 HUMAN GSE103409 SGRNA6DAY4 RNASEQ DOWN	14/221	0.0105667	0.184185	2.10397	9.57319	MT-ND4;MT-ND5;GLO1;AZU1;MT-ND2;RNASE2;MT-ND3;ASS1;MT-ND1;MT-ATP6;ZEB2;SLC6A8;CHI3L1;EMB	tf_perturb	2_3
0.24375	FOXP2 OE SHSY5Y HUMAN GSE100291 RNASEQ UP	20/360	0.0105766	0.184185	1.8351	8.34808	MT-ND6;MT-ND5;JAG1;DST;GBA;HTRA1;UNC5C;GNS;PRSS12;MT-ATP8;CKAP4;FSTL3;THBS3;LAMP5;APMAP;C1QTNF6;IL6ST;MT-CYB;CD276;FBN1	tf_perturb	2_3
0.244444	TWIST1 OE MOUSE GSE50002 CREEDSID GENE 1075 UP	19/338	0.0111472	0.192389	1.85712	8.35065	ERO1B;VWA5A;FAH;LIPA;KIAA1217;SCCPDH;GPNMB;RPS6KA2;TMEM67;CTH;DDIT4;CAPN5;TNFSF10;PLIN3;GSAP;REEP6;ADAMTS9;PLCD1;PDK1	tf_perturb	2_3
0.245139	AHR KO MOUSE GSE10082 CREEDSID GENE 1465 DOWN	14/223	0.0113721	0.194533	2.08362	9.32754	ERO1B;SLC45A3;ZFAND4;PPM1M;DAPK2;GLO1;ZBTB16;RGS16;TBC1D2B;ANK1;CLPX;KIFC3;SERINC2;PDK1	tf_perturb	2_3
0.245833	MYC OE HUMAN GSE43730 CREEDSID GENE 359 DOWN	18/316	0.0117116	0.198495	1.88235	8.37116	JAG1;FAM114A1;PROS1;VWA5A;HTRA1;TMEM263;TPST1;C5;GNA15;FAP;CPS1;BIN1;ANPEP;RPS6KA2;MT1G;ADAMTS6;ANKS1B;FBN1	tf_perturb	2_3
0.246528	IRF9 OE HUMAN GSE50002 CREEDSID GENE 1659 UP	12/180	0.011859	0.198495	2.21937	9.84217	PLAC8;ACOT9;CPM;ECM1;RSAD2;KIF5C;P2RY2;CREG1;EPHX1;TNFSF10;HTRA1;AGT	tf_perturb	2_3
0.247222	HOXA10 KO MOUSE GSE6439 CREEDSID GENE 1535 DOWN	13/202	0.0119118	0.198495	2.1383	9.47313	CFD;SMAD3;ZBTB16;HTRA1;ADRB2;LIPA;PRSS12;ART3;PLAC8;TBXA2R;ZXDB;MPC2;CD302	tf_perturb	2_3
0.247917	REST SHRNA C2 HUMAN GSE90068 PBMPA RNASEQ DOWN	9/118	0.0123496	0.204032	2.56096	11.2532	ITGA4;GPNMB;ANPEP;ZBTB38;DDIT4;PRUNE2;TWIST2;HSPG2;FBN1	tf_perturb	2_3
0.248611	HOXA11 SIRNA BT549 HUMAN GSE79586 RNASEQ DOWN	19/342	0.0125035	0.204824	1.83373	8.03496	MT-ND6;MT-ND4L;MT-ND4;MT-ND5;DST;PRUNE2;NAV1;MT-ND2;MT-ND3;GNS;ARID1B;MT-ATP8;MT-ND1;CAMSAP2;MT-ATP6;ALDH3A2;MT-CO2;MT-CYB;MYH10	tf_perturb	2_3
0.249306	POU5F1 KD MOUSE GSE56853 CREEDSID GENE 1336 DOWN	12/182	0.0128583	0.208408	2.19303	9.54796	SOCS2;PRPS2;POLA1;SLC24A1;SEMA4A;DAB1;CAMKV;CTH;TCEA3;SHISA2;AOAH;FAH	tf_perturb	2_3
0.25	TSHZ3 SIRNA MDAMB231 HUMAN GSE79586 RNASEQ UP	22/416	0.0129379	0.208408	1.74272	7.57664	MT-ND6;MT-ND4L;MT-ND4;TMEM87B;MT-ND5;SMAD3;DST;ZBTB38;MT-ND2;MT-ND3;PTPN14;MT-ATP8;CKAP4;MT-ND1;MT-ATP6;CDK6;ASPH;DDIT4;MT-CO2;IL6ST;MT-CYB;HLA-DRB1	tf_perturb	2_3
0.250694	ARID3B KO MOUSE GSE62069 CREEDSID GENE 2591 DOWN	13/205	0.01334	0.212088	2.10455	9.08534	MT-ND4L;MT-ND4;MT-ND5;DNAJC5B;HNMT;MT-ND3;MT-ATP8;MT-ATP6;GPRIN3;UGT8;PHACTR3;INSM1;MT-CYB	tf_perturb	2_3
0.251389	IRF5 KD HUMAN GSE50588 CREEDSID GENE 2801 UP	18/321	0.0135698	0.212088	1.85081	7.95829	SEMA4A;RSAD2;RIPK2;RGS16;PTAFR;CXCR4;RASGRP1;FSTL3;HERC5;FCER2;GJB2;GNA15;IRAK2;CREG1;SPATA24;DDIT4;TNFSF10;HERC6	tf_perturb	2_3
0.252083	KMT2A KO MOUSE GSE24964 CREEDSID GENE 3008 DOWN	16/274	0.0136085	0.212088	1.93036	8.29487	RSAD2;PCOLCE2;CPQ;PYHIN1;PROS1;EPHX1;EBF1;SLC50A1;LIPA;GNS;PTPN14;AGT;MNDA;XAF1;GALK2;HERC6	tf_perturb	2_3
0.252778	SOX2 KD MOUSE GSE64965 CREEDSID GENE 2616 UP	15/251	0.013672	0.212088	1.97747	8.4881	OLFML2B;RSAD2;EPHX1;UNC5C;FSTL3;PLAC8;SLC22A23;GSTA4;CTH;ALDH1A1;MNDA;CD302;SYNPO;GAS6;ADAMTS7	tf_perturb	2_3
0.253472	GATA3 KO MOUSE GSE39864 CREEDSID GENE 1162 DOWN	13/206	0.0138442	0.212088	2.09354	8.96012	SLC24A3;RSAD2;PYHIN1;ZBTB16;RGS16;DNAJC12;TTC28;PJA1;SLC22A23;ARHGAP20;GSTA4;TNFSF10;GSAP	tf_perturb	2_3
0.254167	PPARG DEFICIENCY MOUSE GSE23421 CREEDSID GENE 1231 DOWN	13/206	0.0138442	0.212088	2.09354	8.96012	CFD;AOC1;RAB4A;PCOLCE2;SHISA2;ANK1;SULT1A1;IMMP2L;ARHGAP20;TCEA3;ALDH1A1;REEP6;PPARGC1A	tf_perturb	2_3
0.254861	FOXD4L6 SIRNA MDAMB231 HUMAN GSE79586 RNASEQ DOWN	16/275	0.0140441	0.212088	1.92281	8.20183	ANKRD28;MT-ND4L;MT-ND4;MT-ND5;SMAD3;DST;GLO1;MT-ND2;MT-ND3;HSPG2;PTPN14;MT-ND1;MT-ATP6;MT-CO2;MT-CYB;CD55	tf_perturb	2_3
0.255556	IRX6 SIRNA MDAMB231 HUMAN GSE79586 RNASEQ DOWN	16/275	0.0140441	0.212088	1.92281	8.20183	MT-ND4L;MT-ND4;MT-ND5;DST;NBPF9;ZBTB38;MT-ND2;HSPG2;MT-ND1;KIAA1217;MT-ATP6;TNFSF10;MT-CO2;GAS6;MT-CYB;CD55	tf_perturb	2_3
0.25625	MYC OE MOUSE GSE27159 CREEDSID GENE 1273 DOWN	12/185	0.0144764	0.215041	2.15467	9.12553	CSGALNACT1;CPM;COL4A2;FAP;CTH;SHROOM2;TMEM51;ITGA6;REEP6;MERTK;MYH10;ST6GALNAC4	tf_perturb	2_3
0.256944	FOXQ1 OE HUVEC HUMAN GSE79306 RNASEQ UP	10/142	0.0145438	0.215041	2.35068	9.94478	MT-ND4L;COL4A2;NBPF9;ANPEP;HTRA1;SEMA3G;NAV1;HSPG2;MYH10;FBN1	tf_perturb	2_3
0.257639	SUZ12 KD HEK293 HUMAN GSE50177 RNASEQ UP	14/230	0.0145734	0.215041	2.01536	8.52207	MT-ND6;MT-ND4;MT-ND5;GLO1;MT-ND2;MT-ND3;PTPN14;MT-ND1;MT-ATP6;CDK6;COL4A2;DDIT4;MT-CO2;MT-CYB	tf_perturb	2_3
0.258333	REST KD MOUSE GSE28141 CREEDSID GENE 1331 UP	17/300	0.0147022	0.215298	1.87042	7.89273	MAP10;TMEM185B;RIC3;OTUD7A;LRRC3;NAV1;SYP;AOAH;MAPK8IP2;GDAP1;GANC;TBC1D25;CRYL1;KIZ;PDK1;CD276;CCDC40	tf_perturb	2_3
0.259028	KCNIP3 KO MOUSE GSE16874 CREEDSID GENE 1030 UP	17/301	0.0151442	0.220103	1.86374	7.80932	CSF1R;SEMA4A;SLC45A3;MS4A3;RSAD2;TMEM51;TBC1D2B;MERTK;PTPN14;RAB32;FMNL2;CREG1;TFEC;DMXL2;ALDH1A1;EMB;ELANE	tf_perturb	2_3
0.259722	SOX2 KO HUMAN GSE59234 CREEDSID GENE 2957 DOWN	18/326	0.0156526	0.225794	1.82028	7.56713	CPM;SEMA4A;IQSEC2;PRUNE2;MTUS1;SLC4A11;SUGCT;SLC22A23;SOCS2;UGT8;STOX2;PCNX2;GAL;KCNN2;PIM2;KLKB1;CNIH3;PDK1	tf_perturb	2_3
0.260417	NCOA2 KO MOUSE GSE55002 CREEDSID GENE 199 DOWN	16/279	0.0158961	0.227608	1.89316	7.84089	CSF1R;NRP2;ZFAND4;ZBTB16;RGS16;CXCR4;ADRB2;MERTK;LY9;PLAC8;MARCO;DDIT4;TFEC;SLAMF8;MNDA;PDK1	tf_perturb	2_3
0.261111	OVOL1 KD BEWO HUMAN GSE66962 RNASEQ DOWN	17/304	0.0165326	0.232652	1.84397	7.56473	MT-ND6;MT-ND4L;CSF1R;CPM;MT-ND4;MT-ND5;MT-ND2;MT-ATP8;MT-ND1;CAMSAP2;MT-ATP6;STS;COL4A2;MT-CO2;SYNPO;MT-CYB;EXPH5	tf_perturb	2_3
0.261806	EOMES KO MOUSE GSE43387 CREEDSID GENE 2147 DOWN	13/211	0.0165879	0.232652	2.04014	8.36271	KCNG1;FAM49A;DLX1;DLX2;KRT10;APCDD1;TTC28;TMEM177;TRIM9;GPR176;CDK6;CAMKV;KCNN2	tf_perturb	2_3
0.2625	TET2 KO MOUSE GSE27816 CREEDSID GENE 457 DOWN	15/257	0.0166094	0.232652	1.92784	7.89986	CSF1R;MS4A3;IL31RA;SNHG8;ATP5MC3;TBC1D2B;FRMD4A;FURIN;CST7;ARID1B;CKAP4;FSTL3;IRF8;EMB;ELANE	tf_perturb	2_3
0.263194	ZRSR2 SHRNA TF1 HUMAN GSE63816 RNASEQ DOWN	13/212	0.017183	0.238954	2.02978	8.24871	MT-ND6;MT-ND4;MS4A3;LYZ;MT-ND3;HSPG2;SOCS2;TANC1;DDIT4;TNFSF10;MT-CO2;MT-CYB;CD55	tf_perturb	2_3
0.263889	STAT3 SIRNA MDAMB231 HUMAN GSE85579 RNASEQ UP	9/125	0.0174479	0.240072	2.40555	9.73894	MT-ND6;MT-ATP6;MT-ND4;MT-ND5;DST;MT-CO2;MT-ND2;HSPG2;MT-ATP8	tf_perturb	2_3
0.264583	KLF5 KO MOUSE GSE43806 CREEDSID GENE 1427 UP	17/306	0.0175117	0.240072	1.83101	7.40624	PRPS2;NIPSNAP3B;MS4A3;ZFAND4;DENND4A;ZFAND1;CST7;HNMT;FAM214A;SNUPN;SULT1A1;GNA15;RRAGB;CXCR2;ALDH1A1;GSAP;PMS1	tf_perturb	2_3
0.265278	TP63 DEPLETION HUMAN GSE5993 CREEDSID GENE 90 UP	13/214	0.0184214	0.246231	2.00938	8.02594	MT-ND4;RSAD2;MT-ND2;ASS1;HERC5;PLAC8;SLPI;DDIT4;TNFSF10;CMPK2;MT-CO2;XAF1;HERC6	tf_perturb	2_3
0.265972	NFE2L2 KO MOUSE GSE18344 CREEDSID GENE 962 DOWN	13/214	0.0184214	0.246231	2.00938	8.02594	MAP10;AOC1;RSAD2;GLO1;MARCO;GPR176;GSTA4;TNN;CREG1;PIR;VILL;SLC25A12;CD276	tf_perturb	2_3
0.266667	IRF8 KO MOUSE GSE39228 CREEDSID GENE 2195 UP	14/237	0.0184275	0.246231	1.95139	7.79366	ANKRD28;OLFML2B;MS4A3;GCA;CEBPE;PPM1M;ATP5MC3;ETFA;AOAH;TIAM1;FMNL2;APMAP;TMED3;ELANE	tf_perturb	2_3
0.267361	IRF9 OE HUMAN GSE50002 CREEDSID GENE 1656 UP	16/284	0.0184705	0.246231	1.85736	7.41379	ECM1;DLX2;RSAD2;CPQ;FRMD4A;ADRB2;APCDD1;ANK1;PIK3R6;PLAC8;FAM210B;TNFSF10;MNDA;KIFC3;XAF1;HERC6	tf_perturb	2_3
01:01:00	Apoptotic execution phase	1952-05-01	5.90482e-05	0.0240917	13.5848	132.277	HIST1H1D;HIST1H1E;CLSPN;SPTAN1;PLEC	bioplanet	7
01:02:00	Apoptosis	8/242	0.000753618	0.121476	4.40981	31.7093	PRKAR1B;IL1B;HIST1H1D;PMAIP1;HIST1H1E;CLSPN;SPTAN1;PLEC	bioplanet	7
01:03:00	Systemic lupus erythematosus	6/139	0.000893206	0.121476	5.77297	40.5303	HIST1H4B;HIST1H2AI;HIST1H3F;H2AFV;HIST2H3D;HIST1H3B	bioplanet	7
01:04:00	Interleukin-2 signaling pathway	16/847	0.00127541	0.130091	2.54165	16.9388	GALNT7;TES;HIST1H2AI;IRS1;LIMK2;RAB27B;PASK;AIF1;ABLIM1;FMNL1;KLF6;IL1B;KLRF1;PMAIP1;CLSPN;EZH2	bioplanet	7
01:05:00	Activated NOTCH1 signaling in the nucleus	2022-03-31	0.00191604	0.156349	13.5205	84.6043	NOTCH1;DTX4;DLK1	bioplanet	7
01:06:00	Cell-cell communication	5/129	0.00382191	0.214097	5.12903	28.5534	PARD6B;TYROBP;CDH24;SPTAN1;PLEC	bioplanet	7
01:07:00	Caspase-mediated cleavage of cytoskeletal proteins	2022-02-12	0.0039824	0.214097	25.1013	138.706	SPTAN1;PLEC	bioplanet	7
01:08:00	Activation of DNA fragmentation factor	2022-02-13	0.00468185	0.214097	22.8182	122.398	HIST1H1D;HIST1H1E	bioplanet	7
01:09:00	Axon guidance	8/325	0.00472274	0.214097	3.24141	17.3589	ABLIM1;TYROBP;LIMK2;SEMA4C;AGAP2;CACNA1D;EPHA1;SPTAN1	bioplanet	7
02:01:00	NELFE ENCODE	9/234	0.000114907	0.0109162	5.19603	47.1352	HSPA8;KLF6;CBX5;HIST1H4B;HIST1H2AI;FASN;PMAIP1;HIST1H1E;HIST1H3B	encode_chea	7
02:02:00	E2F4 ENCODE	15/710	0.000591987	0.0281194	2.84967	21.1788	HSPA8;CBX5;HIST1H2AI;CDCA5;NCAPG2;H2AFV;PASK;RECQL4;FAM111A;CCNE2;CLSPN;HIST1H3B;MXD3;CEP89;EZH2	encode_chea	7
02:03:00	SALL4 CHEA	9/355	0.00228088	0.055913	3.35808	20.4278	PARD6B;FASN;SLCO4C1;ARID5B;TNRC18;IGF2BP2;SSBP3;WNT4;EZH2	encode_chea	7
02:04:00	STAT5A ENCODE	7/233	0.00275382	0.055913	3.97067	23.4062	HIST1H4B;HIST1H2AI;PRKAR1B;HIST1H1E;H2AFV;HIST1H3B;SIPA1	encode_chea	7
02:05:00	NFYA ENCODE	30/2250	0.00340094	0.055913	1.8316	10.4103	TES;LINC00265;ZNF44;RECQL4;C7ORF50;PARD6B;SPTLC2;HIST1H3F;HIST1H1E;CLSPN;HIST1H3B;SOX4;SLC25A25;HSPA8;LRRC45;CBX5;HIST1H2AI;H2AFV;DHCR24;PASK;FAM111A;KLF6;CCNE2;SAPCD2;FASN;ZNF136;SSBP3;MXD3;CEP89;EZH2	encode_chea	7
02:06:00	RUNX1 CHEA	20/1294	0.00353135	0.055913	2.08186	11.7543	HSPA8;DTNB;CDCA5;AGAP2;H2AFV;RAB27B;DHCR24;LTC4S;GBA2;PALD1;IL17RA;PTP4A3;ABLIM1;KLF6;SH3TC1;EPHA1;HIST1H3B;SH2B3;SOX4;PLEC	encode_chea	7
02:07:00	GATA1 CHEA	14/807	0.00543132	0.0646902	2.30318	12.0124	GALNT7;NOTCH1;CD82;LIMK2;RHOH;CCDC88B;ODF2L;SNN;PARD6B;ABLIM1;DPY19L1;CUX1;SPTAN1;SH2B3	encode_chea	7
02:08:00	TAF7 ENCODE	12/640	0.0054476	0.0646902	2.48046	12.9296	HSPA8;KLF6;CBX5;HIST1H4B;HIST1H2AI;FASN;HIST1H3F;HIST1H1D;HIST1H1E;CLSPN;HIST1H3B;EZH2	encode_chea	7
02:09:00	ZMIZ1 ENCODE	15/914	0.00666595	0.0703628	2.17955	10.9212	HIST1H2AI;GCH1;GBA2;IL17RA;DNAJA1;KLF6;HIST1H4B;SAPCD2;FASN;HIST1H3F;HIST1H1D;HIST1H1E;HIST1H3B;SPTAN1;PLEC	encode_chea	7
02:10:00	E2F1 CHEA	14/859	0.00918466	0.0872543	2.15555	10.11	TRIM71;CBX5;TRIM41;CDCA5;LIMK2;AGAP2;PARD6B;HIST1H4B;CUX1;HIST1H3F;HIST1H1D;CLSPN;SOX4;EZH2	encode_chea	7
02:11:00	STAT3 CHEA	5/177	0.0140189	0.121072	3.68867	15.7409	TRIM71;ABLIM1;ARID5B;SMAD7;EZH2	encode_chea	7
02:12:00	IRF1 ENCODE	6/263	0.0193447	0.153145	2.96877	11.7128	DNAJA1;FAM111A;HIST1H4B;HIST1H2AI;H2AFV;TNRC18	encode_chea	7
02:13:00	PPARG CHEA	9/535	0.0284351	0.207795	2.18853	7.79144	KLF6;TES;SH3TC1;RASSF8;SNX10;RETN;DTX4;LTC4S;SSBP3	encode_chea	7
02:14:00	TP63 CHEA	18/1399	0.0310676	0.210816	1.69433	5.88203	CMTM8;CASZ1;LRRC45;NOTCH1;CD82;DTNB;ITGA3;NRM;SYTL1;SMAD7;APLN;SNN;ABLIM1;KLF6;SH3TC1;FASN;ZNF212;WNT4	encode_chea	7
02:15:00	UBTF ENCODE	20/1631	0.0365698	0.231608	1.61648	5.34817	GALNT7;GCH1;SEMA4C;DONSON;DHCR24;DTX4;SMAD7;IL17RA;FMNL1;DPY19L1;SPTLC2;SAPCD2;CUX1;FASN;HIST1H3F;HIST1H3B;SH2B3;SSBP3;SLC25A25;ZNF212	encode_chea	7
02:16:00	NFYB ENCODE	39/3715	0.0398794	0.236784	1.41727	4.5663	TES;LINC00265;CD82;POP1;NCAPG2;ZNF44;RECQL4;C7ORF50;ODF2L;PARD6B;SPTLC2;HIST1H3F;MAN1C1;HIST1H1E;TNRC18;CLSPN;HIST1H3B;SOX4;SLC25A25;NKX3-1;HSPA8;LRRC45;CBX5;HIST1H2AI;GCH1;H2AFV;DHCR24;PASK;LSS;FAM111A;KLF6;CCNE2;SAPCD2;FASN;ZNF136;SSBP3;MXD3;CEP89;EZH2	encode_chea	7
03:01:00	diol biosynthetic process (GO:0034312)	2022-03-17	0.000314644	0.133174	27.0601	218.214	ABCA2;GCH1;SPTLC2	gobp	7
03:02:00	positive regulation of interleukin-6 production (GO:0032755)	1976-05-01	0.000359785	0.133174	8.98183	71.2259	TYROBP;IL1B;AIF1;TIRAP;IL17RA	gobp	7
03:03:00	regulation of gene expression (GO:0010468)	20/1079	0.000397703	0.133174	2.53352	19.837	TRIM71;MYLK2;CASZ1;NOTCH1;RHOH;AIF1;APLN;PTP4A3;TYROBP;IL1B;DNMT3B;IGF2BP2;MYBL1;ZNF114;SOX4;HSPA1B;ZNF212;WNT4;EZH2;NKX3-1	gobp	7
03:04:00	negative regulation of MAP kinase activity (GO:0043407)	1948-04-01	0.0005836	0.133174	11.5361	85.9014	DNAJA1;IL1B;DAB2IP;SH2B3	gobp	7
03:05:00	response to unfolded protein (GO:0006986)	1949-04-01	0.000631549	0.133174	11.2792	83.0977	DNAJA1;HSPA8;DAB2IP;HSPA1B	gobp	7
03:06:00	negative regulation of protein ubiquitination (GO:0031397)	1951-04-01	0.000735717	0.133174	10.7981	77.905	DNAJA1;SOX4;HSPA1B;SMAD7	gobp	7
03:07:00	positive regulation of chemokine production (GO:0032722)	1953-04-01	0.000851481	0.133174	10.3564	73.2043	IL1B;AIF1;TIRAP;IL17RA	gobp	7
03:08:00	negative regulation of cell population proliferation (GO:0008285)	10/379	0.000975125	0.133174	3.5178	24.3887	FABP3;TES;NOTCH1;IL1B;DAB2IP;AIF1;SH2B3;SOX4;HSPA1B;NKX3-1	gobp	7
03:09:00	negative regulation of protein modification by small protein conjugation or removal (GO:1903321)	1955-04-01	0.000979525	0.133174	9.94922	68.9326	DNAJA1;SOX4;HSPA1B;SMAD7	gobp	7
03:10:00	negative regulation of gene expression (GO:0010629)	9/322	0.00117121	0.133174	3.71841	25.0982	TRIM71;NOTCH1;DNMT3B;IGF2BP2;HSPA1B;WNT4;EZH2;NKX3-1;APLN	gobp	7
03:11:00	regulation of cell population proliferation (GO:0042127)	15/764	0.00123968	0.133174	2.63676	17.6476	TRIM71;TES;NOTCH1;IRS1;DAB2IP;AIF1;FABP3;SAPCD2;IL1B;EPHA1;SH2B3;SOX4;HSPA1B;EZH2;NKX3-1	gobp	7
03:12:00	cellular response to unfolded protein (GO:0034620)	2022-03-27	0.00127633	0.133174	15.7771	105.135	HSPA8;DAB2IP;HSPA1B	gobp	7
03:13:00	negative regulation of steroid metabolic process (GO:0045939)	2022-02-07	0.00130087	0.133174	50.2152	333.666	ABCA2;WNT4	gobp	7
03:14:00	response to organic cyclic compound (GO:0014070)	1960-04-01	0.00135787	0.133174	9.05861	59.8035	ABCA2;IL1B;PMAIP1;NKX3-1	gobp	7
03:15:00	ventricular septum morphogenesis (GO:0060412)	2022-03-28	0.00142115	0.133174	15.1452	99.2965	NOTCH1;SOX4;SMAD7	gobp	7
03:16:00	regulation of insulin secretion (GO:0050796)	5/104	0.00149729	0.133174	6.43239	41.8369	IRS1;IL1B;CACNA1D;ITPR3;SOX4	gobp	7
03:17:00	telomeric D-loop disassembly (GO:0061820)	2022-02-08	0.00172539	0.133174	41.8439	266.223	RECQL4;SLX4	gobp	7
03:18:00	cellular nitrogen compound biosynthetic process (GO:0044271)	2022-03-31	0.00191604	0.133174	13.5205	84.6043	ABCA2;SPTLC2;GCH1	gobp	7
03:19:00	regulation of interleukin-6 production (GO:0032675)	5/110	0.00191791	0.133174	6.06298	37.9331	TYROBP;IL1B;AIF1;TIRAP;IL17RA	gobp	7
03:20:00	cardiac muscle tissue morphogenesis (GO:0055008)	1932-03-01	0.00210193	0.133174	13.0536	80.4741	MYLK2;NOTCH1;SMAD7	gobp	7
03:21:00	cellular response to topologically incorrect protein (GO:0035967)	1932-03-01	0.00210193	0.133174	13.0536	80.4741	HSPA8;DAB2IP;HSPA1B	gobp	7
03:22:00	negative regulation of chemotaxis (GO:0050922)	1932-03-01	0.00210193	0.133174	13.0536	80.4741	NOTCH1;SEMA4C;AIF1	gobp	7
03:23:00	regulation of cell adhesion molecule production (GO:0060353)	2022-02-09	0.00220673	0.133174	35.8644	219.355	NOTCH1;IL1B	gobp	7
03:24:00	regulation of glial cell proliferation (GO:0060251)	2022-02-09	0.00220673	0.133174	35.8644	219.355	NOTCH1;IL1B	gobp	7
03:25:00	mitral valve morphogenesis (GO:0003183)	2022-02-09	0.00220673	0.133174	35.8644	219.355	NOTCH1;SOX4	gobp	7
03:26:00	response to lipid (GO:0033993)	5/114	0.00224257	0.133174	5.8393	35.6205	ABCA2;GCH1;IL1B;TIRAP;NKX3-1	gobp	7
03:27:00	cellular response to decreased oxygen levels (GO:0036294)	1969-04-01	0.0022772	0.133174	7.80079	47.4663	KCND2;PMAIP1;AK4;NKX3-1	gobp	7
03:28:00	regulation of nucleic acid-templated transcription (GO:1903506)	10/430	0.00247496	0.13957	3.08254	18.5	CASZ1;PTP4A3;NOTCH1;RHOH;MYBL1;ZNF114;SOX4;ZNF212;EZH2;NKX3-1	gobp	7
03:29:00	telomeric loop disassembly (GO:0090657)	2022-02-10	0.00274395	0.149403	31.3797	185.089	RECQL4;SLX4	gobp	7
03:30:00	regulation of peptide hormone secretion (GO:0090276)	1974-04-01	0.00293893	0.152247	7.24176	42.2174	IL1B;ITPR3;CACNA1D;PASK	gobp	7
03:31:00	positive regulation of lymphocyte proliferation (GO:0050671)	1975-04-01	0.00308544	0.152247	7.1394	41.2733	CCDC88B;IL1B;AIF1;TIRAP	gobp	7
03:32:00	positive regulation of T cell activation (GO:0050870)	1975-04-01	0.00308544	0.152247	7.1394	41.2733	CCDC88B;IL1B;RHOH;AIF1	gobp	7
03:33:00	regulation of epithelial to mesenchymal transition (GO:0010717)	1976-04-01	0.00323687	0.154879	7.03989	40.3607	IL1B;DAB2IP;SMAD7;EZH2	gobp	7
03:34:00	ventricular septum development (GO:0003281)	1938-03-01	0.00345193	0.155731	10.8126	61.2945	NOTCH1;SOX4;SMAD7	gobp	7
03:35:00	negative regulation of G0 to G1 transition (GO:0070317)	1938-03-01	0.00345193	0.155731	10.8126	61.2945	CBX5;DAB2IP;EZH2	gobp	7
03:36:00	negative regulation of protein serine/threonine kinase activity (GO:0071901)	1978-04-01	0.00355477	0.155916	6.84893	38.6243	PRKAR1B;IL1B;DAB2IP;SH2B3	gobp	7
03:37:00	regulation of cellular component biogenesis (GO:0044087)	1939-03-01	0.00371785	0.157205	10.5117	58.8087	HSPA8;NOTCH1;DAB2IP	gobp	7
03:38:00	negative regulation of cellular response to growth factor stimulus (GO:0090288)	1980-04-01	0.00389324	0.157205	6.66802	36.9976	NOTCH1;DAB2IP;APLN;SMAD7	gobp	7
03:39:00	adipose tissue development (GO:0060612)	2022-02-12	0.0039824	0.157205	25.1013	138.706	SPTLC2;ARID5B	gobp	7
03:40:00	negative regulation of cilium assembly (GO:1902018)	2022-02-12	0.0039824	0.157205	25.1013	138.706	ODF2L;LIMK2	gobp	7
03:41:00	regulation of G0 to G1 transition (GO:0070316)	1941-03-01	0.00428637	0.15729	9.95743	54.291	CBX5;DAB2IP;EZH2	gobp	7
03:42:00	regulation of cellular macromolecule biosynthetic process (GO:2000112)	10/468	0.00450362	0.15729	2.82125	15.2429	CASZ1;PTP4A3;NOTCH1;RHOH;MYBL1;ZNF114;SOX4;ZNF212;EZH2;NKX3-1	gobp	7
03:43:00	positive regulation of epithelial to mesenchymal transition (GO:0010718)	1942-03-01	0.00458929	0.15729	9.70162	52.2338	NOTCH1;IL1B;EZH2	gobp	7
03:44:00	negative regulation of cellular macromolecule biosynthetic process (GO:2000113)	11/547	0.00462159	0.15729	2.65882	14.2965	TRIM71;HSPA8;NOTCH1;CBX5;DAB2IP;ARID5B;IGF2BP2;PASK;WNT4;EZH2;NKX3-1	gobp	7
03:45:00	sphingoid biosynthetic process (GO:0046520)	2022-02-13	0.00468185	0.15729	22.8182	122.398	ABCA2;SPTLC2	gobp	7
03:46:00	sphingosine biosynthetic process (GO:0046512)	2022-02-13	0.00468185	0.15729	22.8182	122.398	ABCA2;SPTLC2	gobp	7
03:47:00	positive regulation of cellular carbohydrate metabolic process (GO:0010676)	2022-02-13	0.00468185	0.15729	22.8182	122.398	IRS1;PMAIP1	gobp	7
03:48:00	cardiac ventricle morphogenesis (GO:0003208)	1944-03-01	0.00523321	0.172151	9.22744	48.4692	NOTCH1;SOX4;SMAD7	gobp	7
03:49:00	positive regulation of glucose metabolic process (GO:0010907)	2022-02-14	0.00543359	0.174254	20.9156	109.078	IRS1;PMAIP1	gobp	7
03:50:00	positive regulation of gene expression (GO:0010628)	10/482	0.00551786	0.174254	2.73559	14.2244	CCDC88B;MYLK2;TYROBP;NOTCH1;IL1B;DNMT3B;PASK;SOX4;HSPA1B;NKX3-1	gobp	7
03:51:00	negative regulation of signal transduction (GO:0009968)	7/267	0.00577934	0.176826	3.44545	17.756	IRS1;IL1B;DAB2IP;DLK1;EZH2;NKX3-1;APLN	gobp	7
03:52:00	axon guidance (GO:0007411)	6/203	0.00591923	0.176826	3.88483	19.9274	NOTCH1;SEMA4C;TNR;RHOH;EPHA1;SPTAN1	gobp	7
03:53:00	negative regulation of cellular process (GO:0048523)	11/566	0.00593527	0.176826	2.56527	13.1517	FABP3;TES;NOTCH1;IL1B;DAB2IP;MYBL1;SH2B3;SOX4;HSPA1B;SIPA1;NKX3-1	gobp	7
03:54:00	regulation of establishment of protein localization (GO:0070201)	2022-02-15	0.00623675	0.179052	19.3057	98.021	DNAJA1;PTP4A3	gobp	7
03:55:00	negative regulation of ubiquitin-protein transferase activity (GO:0051444)	2022-02-15	0.00623675	0.179052	19.3057	98.021	USP44;SMAD7	gobp	7
03:56:00	neural tube development (GO:0021915)	2022-02-16	0.00709049	0.196419	17.9259	88.7151	TRIM71;SOX4	gobp	7
03:57:00	positive regulation of small molecule metabolic process (GO:0062013)	2022-02-16	0.00709049	0.196419	17.9259	88.7151	IRS1;PMAIP1	gobp	7
03:58:00	regulation of MAP kinase activity (GO:0043405)	1997-04-01	0.00768432	0.209199	5.44444	26.5067	IL1B;DAB2IP;SH2B3;EZH2	gobp	7
03:59:00	muscle tissue morphogenesis (GO:0060415)	2022-02-17	0.00799394	0.213939	16.73	80.7902	MYLK2;NOTCH1	gobp	7
0.166667	positive regulation of stress-activated MAPK cascade (GO:0032874)	1999-04-01	0.00824706	0.217035	5.32928	25.5694	IL1B;SEMA4C;DAB2IP;TIRAP	gobp	7
0.167361	response to lipopolysaccharide (GO:0032496)	5/159	0.00912613	0.232795	4.12359	19.3669	TRIM41;GCH1;IL1B;DAB2IP;TIRAP	gobp	7
0.168056	regulation of cell death (GO:0010941)	4/102	0.00914078	0.232795	5.16536	24.2514	DHCR24;SOX4;HSPA1B;NKX3-1	gobp	7
0.16875	Rac protein signal transduction (GO:0016601)	2022-02-19	0.00994663	0.237966	14.7602	68.0524	RHOH;AIF1	gobp	7
0.169444	atrioventricular valve morphogenesis (GO:0003181)	2022-02-19	0.00994663	0.237966	14.7602	68.0524	NOTCH1;SOX4	gobp	7
0.170139	sphingosine metabolic process (GO:0006670)	2022-02-19	0.00994663	0.237966	14.7602	68.0524	ABCA2;SPTLC2	gobp	7
0.170833	negative regulation of nervous system development (GO:0051961)	2022-02-19	0.00994663	0.237966	14.7602	68.0524	NOTCH1;IL1B	gobp	7
04:01:00	ZNF750 KD HUMAN GSE38039 CREEDSID GENE 2704 DOWN	13/325	2.23517e-06	0.00202422	5.53515	72.0189	CBX5;IRS1;CDCA5;NCAPG2;NRM;CCNE2;FASN;HIST1H3F;GPAT3;CLSPN;HIST2H3D;HIST1H3B;EZH2	tf_perturb	7
04:02:00	ZNF750 KD HUMAN GSE38039 CREEDSID GENE 204 UP	13/326	2.31208e-06	0.00202422	5.51718	71.5985	CBX5;IRS1;CDCA5;NCAPG2;NRM;CCNE2;FASN;HIST1H3F;GPAT3;CLSPN;HIST2H3D;HIST1H3B;EZH2	tf_perturb	7
04:03:00	ARID2 SIRNA HEPG2 HUMAN GSE69567 RNASEQ UP	12/302	5.95071e-06	0.00347323	5.46598	65.7667	TRIM71;HSPA8;DBNDD1;KLF6;DAB2IP;ITPR3;TMC6;PLCD3;LSS;DLK1;HSPA1B;PLEC	tf_perturb	7
04:04:00	EHF SIRNA HBE HUMAN GSE85402 RNASEQ UP	11/320	5.54011e-05	0.0242518	4.6663	45.734	ABCA2;ABLIM1;NOTCH1;CBX5;ITGA3;ITPR3;DHCR24;SPTAN1;LSS;WNT4;PLEC	tf_perturb	7
04:05:00	JUND SIRNA PC3 HUMAN GSE53470 RNASEQ DOWN	9/239	0.00013481	0.0472105	5.08177	45.287	SAPCD2;ITGA3;PMAIP1;RASSF8;ITPR3;DHCR24;PLCD3;HSPA1B;PLEC	tf_perturb	7
04:06:00	STAT1 KO MOUSE GSE33057 CREEDSID GENE 1529 UP	9/246	0.000167453	0.0488685	4.92992	42.8647	FAM111A;TYROBP;CD82;CCNE2;SAPCD2;GREB1;IGF2BP2;UPB1;SMAD7	tf_perturb	7
04:07:00	CHD1 KO 22RV1 HUMAN GSE84610 RNASEQ UP	11/387	0.000292561	0.0585765	3.82165	31.0961	ABCA2;HSPA8;CBX5;CUX1;HIST1H1E;TNRC18;HIST2H3D;HIST1H3B;HSPA1B;PLEC;APLN	tf_perturb	7
04:08:00	NFKB1 ACTIVATION HUMAN GSE20736 CREEDSID GENE 2522 UP	9/268	0.00031581	0.0585765	4.5061	36.3208	IRS1;ITGA3;IL1B;PMAIP1;RAB27B;GPAT3;SH2B3;PLS1;SMAD7	tf_perturb	7
04:09:00	EPAS1 KD HUVEC HUMAN GSE62974 RNASEQ UP	10/328	0.000318837	0.0585765	4.09266	32.9493	DNAJA1;KLF6;SPTLC2;ITGA3;RASSF8;ITPR3;SPTAN1;PGM2L1;PLEC;APLN	tf_perturb	7
04:10:00	RORC KO MOUSE GSE27241 CREEDSID GENE 1686 DOWN	10/330	0.000334532	0.0585765	4.06667	32.5446	FAM111A;CCNE2;SAPCD2;CDCA5;NCAPG2;CLSPN;PASK;HIST1H3B;HSPA1B;CEP89	tf_perturb	7
04:11:00	STAT3 SIRNA MDAMB157 HUMAN GSE85579 RNASEQ UP	10/336	0.00038554	0.0613709	3.99059	31.3695	DNAJA1;HSPA8;KLF6;ITGA3;ITPR3;IGF2BP2;SPTAN1;LSS;HSPA1B;PLEC	tf_perturb	7
04:12:00	STAT3 SIRNA MDAMB231 HUMAN GSE85579 RNASEQ DOWN	12/475	0.000452477	0.066024	3.39332	26.1312	RECQL4;ABCA2;HSPA8;CBX5;CD82;SAPCD2;IRS1;ITGA3;DAB2IP;H2AFV;TNRC18;SPTAN1	tf_perturb	7
04:13:00	ARID3A OE MOUSE GSE56853 CREEDSID GENE 1339 UP	10/350	0.000530204	0.0665245	3.82353	28.838	GALNT7;PARD6B;FABP3;KLF6;TES;CCNE2;IRS1;DNMT3B;PMAIP1;WNT4	tf_perturb	7
04:14:00	HSF1 KD HUMAN GSE12762 CREEDSID GENE 2142 DOWN	9/289	0.000545786	0.0665245	4.16367	31.2828	HIST1H4B;DTNB;ITGA3;SELENOW;HIST1H1D;HIST1H1E;SSBP3;HSPA1B;CRYZ	tf_perturb	7
04:15:00	NFE2L2 KO MOUSE GSE18344 CREEDSID GENE 1259 DOWN	11/419	0.000569884	0.0665245	3.51612	26.2657	CCDC88B;ABCA2;FMNL1;PRKAR1B;ITGA3;ITPR3;FAM193B;TMC6;SH2B3;SIPA1;WNT4	tf_perturb	7
04:16:00	IKZF3 MUT MOUSE GSE12356 CREEDSID GENE 599 DOWN	9/305	0.000801028	0.0876625	3.93539	28.0578	DNAJA1;HSPA8;PTP4A3;ABLIM1;RHOH;H2AFV;ITPR3;SOX4;EZH2	tf_perturb	7
04:17:00	ZNF503 SHRNA H1 HUMAN GSE69618 DAY2 RNASEQ UP	11/441	0.000867067	0.0893079	3.33245	23.4951	HSPA8;ABLIM1;HIST1H4B;HIST1H2AI;USP44;HIST1H3F;HIST1H1D;PMAIP1;HIST1H1E;HIST2H3D;HIST1H3B	tf_perturb	7
04:18:00	TSHZ3 SIRNA T47D HUMAN GSE79586 RNASEQ DOWN	6/142	0.000997943	0.092149	5.64477	39.0043	ABCA2;HSPA8;ITPR3;DHCR24;LSS;PLEC	tf_perturb	7
04:19:00	FOXO1 KD MOUSE GSE6623 CREEDSID GENE 505 DOWN	7/195	0.000999903	0.092149	4.78251	33.0368	HSPA8;KLF6;SELENOW;PMAIP1;TENT5C;HSPA1B;SMAD7	tf_perturb	7
04:20:00	TAL1 KD HUMAN GSE54075 CREEDSID GENE 2565 DOWN	9/319	0.0010974	0.0925899	3.75497	25.5894	HIST1H4B;HIST1H2AI;HIST1H3F;HIST1H1D;MAN1C1;HIST1H1E;GPAT3;HIST1H3B;ASRGL1	tf_perturb	7
04:21:00	CHD1 KD 22RV1 HUMAN GSE84610 RNASEQ UP	8/257	0.00111044	0.0925899	4.14098	28.1711	CBX5;HIST1H2AI;HIST1H1E;HIST2H3D;HIST1H3B;SOX4;HSPA1B;PLEC	tf_perturb	7
04:22:00	STAT1 KO MOUSE GSE48970 CREEDSID GENE 1519 UP	7/204	0.00129828	0.100317	4.56193	30.3218	NOTCH1;FASN;RASSF8;AK4;DHCR24;GPAT3;LSS	tf_perturb	7
04:23:00	SOX2 SIRNA KYSE70 HUMAN GSE47058 RNASEQ DOWN	8/264	0.0013177	0.100317	4.02632	26.702	DNAJA1;HSPA8;SAPCD2;ITGA3;ITPR3;SPTAN1;HSPA1B;PLEC	tf_perturb	7
04:24:00	HOXA7 SHRNA FLHSPC HUMAN GSE76683 RNASEQ DOWN	8/268	0.00144929	0.103923	3.96356	25.9086	DNAJA1;HSPA8;ABLIM1;CBX5;SPTLC2;RAB27B;SPTAN1;DLK1	tf_perturb	7
04:25:00	NR1I3 KO MOUSE GSE40120 CREEDSID GENE 3067 UP	8/269	0.00148376	0.103923	3.94818	25.7152	ABLIM1;TES;HIST1H4B;SPTLC2;SNX10;TENT5C;SLC25A25;IL17RA	tf_perturb	7
04:26:00	ZFX KO MOUSE GSE52416 CREEDSID GENE 1472 DOWN	8/279	0.00186562	0.125642	3.80054	23.8832	ABCA2;HSPA8;HIST1H2AI;FASN;MAN1C1;DHCR24;HIST1H3B;GAPT	tf_perturb	7
04:27:00	BCL11B KO MOUSE GSE9330 CREEDSID GENE 28 UP	9/354	0.00223806	0.145142	3.36798	20.5519	KLF6;TYROBP;IRS1;TNR;HIST1H1E;SSBP3;PGM2L1;DLK1;HSPA1B	tf_perturb	7
04:28:00	TWIST1 OE MOUSE GSE50002 CREEDSID GENE 1078 DOWN	6/168	0.00234933	0.146917	4.73256	28.6492	CCNE2;CDCA5;NCAPG2;DONSON;CLSPN;LSS	tf_perturb	7
04:29:00	IRX6 SIRNA T47D HUMAN GSE79586 RNASEQ DOWN	11/505	0.00253107	0.148264	2.89115	17.2865	ABCA2;HSPA8;CBX5;SPTLC2;LIMK2;GREB1;DAB2IP;TNRC18;DHCR24;LSS;PLEC	tf_perturb	7
04:30:00	REST SHRNA C2 HUMAN GSE90068 PBMPA RNASEQ DOWN	5/118	0.00260554	0.148264	5.63146	33.5078	RASSF8;ITPR3;DHCR24;LSS;PLEC	tf_perturb	7
04:31:00	NFE2L2 KO MOUSE GSE18344 CREEDSID GENE 1262 DOWN	7/231	0.0026249	0.148264	4.00654	23.8097	CMTM8;ITGA3;SLCO4C1;DAB2IP;TNRC18;SH2B3;PLEC	tf_perturb	7
04:32:00	ZNF143 SIRNA MCF7 HUMAN GSE76453 RNASEQ DOWN	7/233	0.00275382	0.150686	3.97067	23.4062	HSPA8;PARD6B;CBX5;ARID5B;RAB27B;DHCR24;SOX4	tf_perturb	7
04:33:00	TFEB OE HUMAN GSE16267 CREEDSID GENE 2976 DOWN	7/239	0.00316993	0.168198	3.8668	22.2498	HSPA8;TES;HIST1H4B;HIST1H1E;HIST2H3D;HIST1H3B;EZH2	tf_perturb	7
04:34:00	ZNF217 SIRNA MCF7 HUMAN GSE58326 RNASEQ DOWN	9/378	0.00345995	0.171594	3.14505	17.8214	DNAJA1;ABCA2;HSPA8;CBX5;SAPCD2;NCAPG2;SEMA4C;SELENOW;DHCR24	tf_perturb	7
04:35:00	KCNIP3 KO MOUSE GSE16874 CREEDSID GENE 1031 UP	7/245	0.00363251	0.171594	3.76817	21.1689	TYROBP;HIST1H4B;IL1B;SELENOW;DONSON;PMAIP1;TENT5C	tf_perturb	7
04:36:00	FOXO1 KO MOUSE GSE40655 CREEDSID GENE 508 UP	8/312	0.0037013	0.171594	3.38227	18.9376	DPY19L1;CCNE2;CDCA5;NCAPG2;PMAIP1;CLSPN;HIST1H3B;TIRAP	tf_perturb	7
04:37:00	REST INHIBITION HUMAN GSE40695 CREEDSID GENE 1710 DOWN	8/312	0.0037013	0.171594	3.38227	18.9376	FABP3;HIST1H4B;IRS1;SLCO4C1;HIST1H3F;HIST1H1D;DHCR24;LSS	tf_perturb	7
04:38:00	MYB KD HUMAN GSE49286 CREEDSID GENE 1837 UP	7/247	0.0037976	0.171594	3.73638	20.8243	FAM111A;CDCA5;FASN;DHCR24;LSS;SH2B3;APLN	tf_perturb	7
04:39:00	NKX25 SHRNA H1 HUMAN GSE69618 DAY6 RNASEQ DOWN	5/129	0.00382191	0.171594	5.12903	28.5534	CBX5;SELENOW;HIST1H1D;HIST1H1E;HIST1H3B	tf_perturb	7
04:40:00	TFAP2C KO MOUSE GSE45941 CREEDSID GENE 1490 DOWN	7/250	0.00405585	0.171982	3.68969	20.3213	TES;GCH1;SLCO4C1;AK4;GPAT3;CEP89;CRYZ	tf_perturb	7
04:41:00	MYB KD HUMAN GSE49286 CREEDSID GENE 1842 DOWN	8/317	0.00407155	0.171982	3.32669	18.3092	CBX5;SAPCD2;CDCA5;DONSON;MYBL1;TENT5C;ZNF212;EZH2	tf_perturb	7
04:42:00	LIN28 OE CD34 HUMAN GSE93256 RNASEQ DOWN	6/189	0.00419787	0.171982	4.18501	22.9053	HIST1H4B;HIST1H2AI;HIST1H3F;HIST1H1D;HIST1H1E;HIST1H3B	tf_perturb	7
04:43:00	ZEB2 SHRNA H1 HUMAN GSE69618 DAY6 RNASEQ UP	8/320	0.00430705	0.171982	3.2942	17.9451	TRIM71;HSPA8;HIST1H4B;HIST1H3F;HIST1H1D;HIST1H1E;HIST1H3B;SPTAN1	tf_perturb	7
04:44:00	FLI1 KD HUMAN GSE27524 CREEDSID GENE 1599 DOWN	7/253	0.00432722	0.171982	3.64414	19.8344	RECQL4;POP1;NCAPG2;RHOH;PASK;MYBL1;PLS1	tf_perturb	7
04:45:00	XPA KO HELA HUMAN GSE100855 RNASEQ DOWN	8/322	0.00446979	0.171982	3.27288	17.7076	ABCA2;HSPA8;SAPCD2;ITGA3;TNRC18;DHCR24;SPTAN1;HSPA1B	tf_perturb	7
04:46:00	PAX7 OE H9 HUMAN GSE98976 PROLIFMYOG RNASEQ UP	9/395	0.00460545	0.171982	3.00391	16.1626	DNAJA1;HSPA8;DPY19L1;CBX5;CUX1;H2AFV;SPTAN1;DLK1;PLEC	tf_perturb	7
04:47:00	TSHZ3 SIRNA MCF7 HUMAN GSE79586 RNASEQ UP	10/470	0.00463872	0.171982	2.8087	15.092	HSPA8;CUX1;SEMA4C;ITPR3;TNRC18;DHCR24;SPTAN1;LSS;HSPA1B;PLEC	tf_perturb	7
04:48:00	FOXD4L6 SIRNA MDAMB231 HUMAN GSE79586 RNASEQ UP	8/325	0.00472274	0.171982	3.24141	17.3589	DNAJA1;HSPA8;FMNL1;DPY19L1;CD82;ITGA3;GPAT3;SH2B3	tf_perturb	7
04:49:00	GATA6 OE HESC HUMAN GSE69322 MTESR1MEDIA RNASEQ UP	9/398	0.00483515	0.171982	2.98029	15.8904	KLF6;ITGA3;GREB1;TNRC18;DHCR24;SPTAN1;LSS;SSBP3;PLEC	tf_perturb	7
04:50:00	FLI1 KD HUMAN GSE27524 CREEDSID GENE 1596 DOWN	7/259	0.00491098	0.171982	3.55628	18.9062	RECQL4;POP1;NCAPG2;RHOH;PASK;MYBL1;PLS1	tf_perturb	7
04:51:00	STAT3 ACTVATION MOUSE GSE21060 CREEDSID GENE 3063 UP	7/260	0.00501377	0.172139	3.54204	18.7571	KLF6;DONSON;ARID5B;SNX10;TIRAP;SLC25A25;IL17RA	tf_perturb	7
04:52:00	HOXA7 SHRNA FLHSPC HUMAN GSE76683 RNASEQ UP	8/332	0.00535571	0.179898	3.17024	16.5791	NOTCH1;HIST1H2AI;CUX1;HIST1H1E;H2AFV;HIST1H3B;AIF1;IL17RA	tf_perturb	7
04:53:00	E2F1 SHRNA NKI HUMAN GSE95304 RNASEQ UP	10/482	0.00551786	0.179898	2.73559	14.2244	ABLIM1;FMNL1;CD82;ITGA3;IL1B;ITPR3;GPAT3;SPTAN1;SH2B3;PLEC	tf_perturb	7
04:54:00	ZNF581 SIRNA BT549 HUMAN GSE79586 RNASEQ DOWN	8/334	0.00554796	0.179898	3.15047	16.3646	HSPA8;ITGA3;RAB27B;DHCR24;MYBL1;SPTAN1;LSS;PLEC	tf_perturb	7
04:55:00	SOX2 SIRNA KYSE70 HUMAN GSE47058 RNASEQ UP	8/336	0.00574544	0.182726	3.13094	16.1536	ABCA2;CBX5;CD82;SYTL1;DAB2IP;TNRC18;DHCR24;FAM193B	tf_perturb	7
04:56:00	GATA1 KO MOUSE GSE40273 CREEDSID GENE 1062 DOWN	7/268	0.00589547	0.182726	3.43207	17.6188	DNAJA1;HSPA8;ABLIM1;SELENOW;HIST1H3B;SSBP3;IL17RA	tf_perturb	7
04:57:00	ZNF589 SIRNA T47D HUMAN GSE79586 RNASEQ DOWN	8/338	0.00594824	0.182726	3.11164	15.9461	HSPA8;DPY19L1;CBX5;SPTLC2;NCAPG2;H2AFV;DHCR24;HSPA1B	tf_perturb	7
04:58:00	ZXDC KD HUMAN GSE45417 CREEDSID GENE 885 DOWN	8/341	0.00626261	0.188353	3.08314	15.6412	CCNE2;GCH1;PMAIP1;GPAT3;EPHA1;UPB1;PLS1;GAPT	tf_perturb	7
04:59:00	GATA3 KO MOUSE GSE39864 CREEDSID GENE 1162 DOWN	6/206	0.00634655	0.188353	3.82597	19.3588	DNAJA1;HIST1H4B;TENT5C;SOX4;TIRAP;HSPA1B	tf_perturb	7
0.208333	OVOL2 OE PC3 HUMAN GSE48230 RNASEQ UP	6/207	0.00649385	0.189512	3.80675	19.1742	ABCA2;ITGA3;IL1B;ITPR3;SPTAN1;PLEC	tf_perturb	7
0.209028	PRDM14 KO MOUSE GSE45507 CREEDSID GENE 3106 UP	6/209	0.0067959	0.195076	3.76886	18.812	FAM111A;PTP4A3;KLF6;DNMT3B;PMAIP1;AK4	tf_perturb	7
0.209722	ETV2 OE HESC HUMAN GSE57395 RNASEQ UP	10/499	0.0069811	0.19716	2.63817	13.0973	KLF6;NOTCH1;LIMK2;ITPR3;DHCR24;SPTAN1;SH2B3;SOX4;PALD1;PLEC	tf_perturb	7
0.210417	CEBPA KO MOUSE GSE61468 CREEDSID GENE 1476 DOWN	7/278	0.00715501	0.198864	3.30374	16.3203	B3GNT8;MAN1C1;PMAIP1;AK4;DHCR24;AIF1;GAPT	tf_perturb	7
0.211111	ESRRA KO MOUSE GSE16623 CREEDSID GENE 2159 UP	6/213	0.0074304	0.203291	3.69528	18.1149	FMNL1;PMAIP1;GPAT3;LTC4S;SLC25A25;HSPA1B	tf_perturb	7
0.211806	NFIX KD MOUSE GSE45492 CREEDSID GENE 2846 UP	7/281	0.00756914	0.203901	3.26707	15.9553	TYROBP;SH3TC1;IL1B;PMAIP1;DTX4;UPB1;DLK1	tf_perturb	7
0.2125	NFYC KD HUMAN GSE50588 CREEDSID GENE 2822 UP	7/283	0.00785491	0.208393	3.24306	15.7179	LRRC45;ABLIM1;TES;ARID5B;PMAIP1;ITPR3;TENT5C	tf_perturb	7
0.213194	STAT3 SIRNA MDAMB468 HUMAN GSE85579 RNASEQ UP	8/358	0.00828893	0.216626	2.93083	14.047	KLF6;ITGA3;TNRC18;DTX4;SPTAN1;SOX4;HSPA1B;PLEC	tf_perturb	7
0.213889	MYC ACTIVATION MOUSE GSE4356 CREEDSID GENE 752 DOWN	5/156	0.00844538	0.217469	4.20615	20.0807	GCH1;HIST1H3B;TENT5C;HSPA1B;WNT4	tf_perturb	7
0.214583	RARA ACTIVATION HUMAN GSE5679 CREEDSID GENE 2385 DOWN	7/291	0.00907832	0.228284	3.15042	14.8128	DNAJA1;HSPA8;SYTL1;MAN1C1;DHCR24;GPAT3;PALD1	tf_perturb	7
0.215278	MYC OE MCF7 HUMAN GSE101738 RNASEQ DOWN	5/159	0.00912613	0.228284	4.12359	19.3669	DNAJA1;HSPA8;KLF6;ARID5B;SOX4	tf_perturb	7
0.215972	TCF12 KD HUMAN GSE50588 CREEDSID GENE 2789 DOWN	7/298	0.0102589	0.244083	3.07354	14.0756	PTP4A3;TYROBP;CD82;KCND2;DONSON;ARID5B;TMC6	tf_perturb	7
0.216667	EZH2 SIRNA MCF7 HUMAN GSE76271 RNASEQ DOWN	8/372	0.0102985	0.244083	2.81608	12.8857	CBX5;HIST1H4B;HIST1H2AI;NCAPG2;HIST1H1D;HIST1H1E;HIST2H3D;HIST1H3B	tf_perturb	7
0.217361	MYC KD MOUSE GSE30323 CREEDSID GENE 2609 DOWN	6/229	0.0104007	0.244083	3.42735	15.6489	FAM111A;TES;CCNE2;NCAPG2;PMAIP1;ITPR3	tf_perturb	7
0.218056	JUND KD HUMAN GSE50588 CREEDSID GENE 2812 UP	7/299	0.0104362	0.244083	3.06285	13.9742	DBNDD1;SNN;ABLIM1;SLCO4C1;GPAT3;SIPA1;GAPT	tf_perturb	7
0.21875	NFE2L2 KO MOUSE GSE18344 CREEDSID GENE 963 DOWN	8/373	0.0104547	0.244083	2.80822	12.8074	ABCA2;ITGA3;SYTL1;SELENOW;RETN;HIST1H3B;LTC4S;HSPA1B	tf_perturb	7
0.219444	CREB1 DEPLETION HUMAN GSE12056 CREEDSID GENE 68 UP	7/302	0.0109818	0.247806	3.03124	13.6755	HSPA8;KLF6;PMAIP1;DHCR24;GPAT3;SH2B3;DLK1	tf_perturb	7
0.220139	SETDB1 KO MOUSE GSE28593 CREEDSID GENE 2205 UP	8/379	0.0114295	0.247806	2.76195	12.3502	CMTM8;PARD6B;KLF6;IRS1;SEMA4C;MAN1C1;GPAT3;WNT4	tf_perturb	7
0.220833	ZNF503 SHRNA H1 HUMAN GSE69618 DAY6 RNASEQ DOWN	4/109	0.0114656	0.247806	4.81929	21.5345	HIST1H4B;SELENOW;HIST1H1E;HIST1H3B	tf_perturb	7
0.221528	FLI1 KD HUMAN GSE27524 CREEDSID GENE 1597 DOWN	6/234	0.0114807	0.247806	3.35133	14.9707	RECQL4;POP1;NCAPG2;RHOH;PASK;PLS1	tf_perturb	7
0.222222	YBX1 SIRNA BT549 HUMAN GSE79586 RNASEQ DOWN	7/305	0.0115477	0.247806	3.00026	13.385	CBX5;ITGA3;NCAPG2;RAB27B;DHCR24;SPTAN1;PLEC	tf_perturb	7
0.222917	FOXP1 OE HUMAN GSE51382 CREEDSID GENE 1434 DOWN	7/306	0.011741	0.247806	2.99008	13.2899	DNAJA1;HSPA8;SH3TC1;PMAIP1;H2AFV;MYBL1;EZH2	tf_perturb	7
0.223611	NKX25 SHRNA H1 HUMAN GSE69618 DAY2 RNASEQ UP	10/541	0.0118903	0.247806	2.42423	10.7443	HSPA8;SELENOW;HIST1H3F;HIST1H1D;PMAIP1;HIST1H1E;DHCR24;EPHA1;HIST2H3D;HIST1H3B	tf_perturb	7
0.224306	IRF1 OE HUMAN GSE26817 CREEDSID GENE 2502 UP	8/383	0.0121156	0.247806	2.73193	12.0567	FAM111A;GCH1;HIST1H3F;PMAIP1;ITPR3;SH2B3;NKX3-1;IL17RA	tf_perturb	7
0.225	MEIS2 KD KASUMI1 HUMAN GSE81328 RNASEQ DOWN	4/111	0.0121934	0.247806	4.72873	20.8389	TNRC18;DHCR24;TMC6;SOX4	tf_perturb	7
0.225694	BACH2 KO MOUSE GSE54050 CREEDSID GENE 2773 UP	8/384	0.0122918	0.247806	2.72452	11.9847	CMTM8;ABLIM1;PRKAR1B;CNRIP1;GREB1;HIST1H1D;RASSF8;TENT5C	tf_perturb	7
0.226389	CTCF SIRNA HEK293 HUMAN GSE44267 RNASEQ DOWN	8/384	0.0122918	0.247806	2.72452	11.9847	RECQL4;DNAJA1;HSPA8;CBX5;SAPCD2;SPTAN1;HSPA1B;PLEC	tf_perturb	7
0.227083	STAT3 KD HUMAN GSE42979 CREEDSID GENE 2148 DOWN	7/309	0.0123349	0.247806	2.95992	13.0098	KLF6;CCNE2;GCH1;ARID5B;PMAIP1;MYBL1;SH2B3	tf_perturb	7
0.227778	ZNF658 KD HUMAN GSE59385 CREEDSID GENE 2924 UP	7/310	0.0125376	0.247806	2.95	12.9181	DNAJA1;PARD6B;NOTCH1;CBX5;CDH24;GPAT3;HSPA1B	tf_perturb	7
0.228472	FOXF2 OE HUVEC HUMAN GSE79306 RNASEQ UP	7/311	0.0127427	0.247806	2.94014	12.8273	HSPA8;ABLIM1;DPY19L1;SPTLC2;DHCR24;SPTAN1;PLEC	tf_perturb	7
0.229167	POU5F1 KD HUMAN GSE21135 CREEDSID GENE 1329 DOWN	5/173	0.0128067	0.247806	3.77727	16.4605	SAPCD2;USP44;MAN1C1;EPHA1;SMAD7	tf_perturb	7
0.229861	EGR2 KD MOUSE GSE53388 CREEDSID GENE 2292 DOWN	6/240	0.0128785	0.247806	3.2644	14.2073	TYROBP;CDCA5;NCAPG2;CLSPN;AIF1;HSPA1B	tf_perturb	7
01:01:00	Pathways in cancer	11/325	3.11593e-05	0.0100645	4.996	51.8405	LAMA5;SHH;KITLG;JUP;FLT3;GSTP1;KIT;TGFA;RAC3;E2F3;WNT3	bioplanet	8
01:02:00	Telomere maintenance	1959-04-01	0.000955412	0.090014	9.99848	69.5231	HIST1H4A;TERT;HIST1H2BH;DNA2	bioplanet	8
01:03:00	Chromosome maintenance	5/103	0.00101439	0.090014	7.04795	48.5848	HIST1H4A;TERT;HIST1H2BH;DNA2;SMC1B	bioplanet	8
01:04:00	Anandamide metabolism	2022-02-07	0.00111473	0.090014	54.3753	369.706	FAAH;CNR2	bioplanet	8
03:01:00	lymphocyte differentiation (GO:0030098)	1984-05-01	0.000400196	0.204221	8.75144	68.4674	JAG2;FLT3;NFAM1;KIT;HDAC9	gobp	8
03:02:00	cellular response to erythropoietin (GO:0036018)	2022-02-05	0.000536013	0.204221	90.6347	682.602	MT2A;KIT	gobp	8
03:03:00	positive regulation of smooth muscle cell differentiation (GO:0051152)	2022-02-05	0.000536013	0.204221	90.6347	682.602	SHH;KIT	gobp	8
01:05:00	Meiosis	1983-04-01	0.00336469	0.211691	6.95253	39.5906	HIST1H4A;DMC1;HIST1H2BH;SMC1B	bioplanet	8
01:06:00	Melanocyte development and pigmentation pathway	2022-02-13	0.0040215	0.211691	24.7086	136.295	KITLG;KIT	bioplanet	8
01:07:00	Erythrocyte differentiation pathway	2022-02-15	0.00536134	0.211691	20.9052	109.304	KITLG;FLT3	bioplanet	8
01:08:00	KIT signaling regulation	2022-02-16	0.00609765	0.211691	19.411	98.993	KITLG;KIT	bioplanet	8
01:09:00	Meiotic recombination	1954-03-01	0.00747565	0.211691	8.03286	39.3297	HIST1H4A;DMC1;HIST1H2BH	bioplanet	8
01:10:00	Non-small cell lung cancer	1954-03-01	0.00747565	0.211691	8.03286	39.3297	TGFA;E2F3;FHIT	bioplanet	8
01:11:00	Nucleotide di- and triphosphate biosynthesis and interconversion	2022-02-18	0.00769965	0.211691	16.9829	82.6485	CTPS2;TXN	bioplanet	8
01:12:00	Meiotic synapsis	1955-03-01	0.00786468	0.211691	7.87798	38.1718	HIST1H4A;HIST1H2BH;SMC1B	bioplanet	8
01:13:00	Acute myeloid leukemia	1957-03-01	0.00867805	0.215616	7.58544	36.0078	JUP;FLT3;KIT	bioplanet	8
01:14:00	Interleukin-3 regulation of hematopoietic cells	2022-02-20	0.0094697	0.21848	15.0944	70.3346	KIT;TGFA	bioplanet	8
