# Supplementary material for: Functional and Multi-Omics Analysis of an Optimized CRISPR-Mediated FURIN Depletion in Cultured Pro-Monocytic Cells
Source: Preprints.org preprint supplement (doi:10.20944/preprints202312.0178.v1), 2023-12-04
Supplement: Supplementary file 2 [file supplementary › ST6.xlsx]

## Sheet: ST6
Gene	term	estimate	std.error	statistic	p.value
ENA-78	(Intercept)	3431.61	572.155	5.9977	0.000966481
MDC	TreatmentLPS	3.15058e-12	1664.48	1.89283e-15	1
IL-1alpha	TreatmentLPS	1.57529e-12	421.615	3.73632e-15	1
TNF-alpha	TreatmentLPS	-309.111	5307.02	-0.0582456	0.955444
TNF-beta	Genotype63:TreatmentLPS	-85.944	1349.94	-0.0636652	0.951305
Angiogenin	Genotype63	-36636.9	777.617	-47.1144	6.12783e-09
G-CSF	(Intercept)	2.62549e-13	120.437	2.17997e-15	1
IL-7	GenotypeWT:TreatmentLPS	128.329	656.66	0.195426	0.851509
IL-13	GenotypeWT:TreatmentLPS	-112.556	563.557	-0.199724	0.848293
IL-13	GenotypeWT	112.556	398.495	0.282453	0.787087
TNF-alpha	Genotype63:TreatmentLPS	-2492.44	7505.26	-0.332093	0.751113
IL-6	Genotype63:TreatmentLPS	-3058.06	5718.01	-0.534812	0.612009
GM-CSF	(Intercept)	-5.25097e-13	112.347	-4.67388e-15	1
MDC	GenotypeWT:TreatmentLPS	1290.6	2353.94	0.548274	0.603289
GRO	GenotypeWT:TreatmentLPS	3900.59	6831.78	0.570949	0.588764
GM-CSF	Genotype63	7414.67	158.883	46.6675	6.48753e-09
TNF-alpha	GenotypeWT:TreatmentLPS	5202.71	7505.26	0.693209	0.514103
TNF-alpha	Genotype63	218435	5307.02	41.1596	1.37546e-08
GRO	(Intercept)	48739.6	3415.89	14.2685	7.41155e-06
TPO	Genotype63:TreatmentLPS	-1157.55	1271.77	-0.910195	0.397809
IL12-p40	GenotypeWT:TreatmentLPS	740.329	794.724	0.931554	0.387516
IL12-p40	Genotype63:TreatmentLPS	-827.944	794.724	-1.0418	0.337651
IL-4	GenotypeWT:TreatmentLPS	-391.056	359.308	-1.08836	0.31821
TNF-beta	GenotypeWT:TreatmentLPS	1484.78	1349.94	1.09989	0.313542
GRO-alpha	(Intercept)	1.57529e-12	367.548	4.28595e-15	1
MIG	GenotypeWT:TreatmentLPS	322.555	290.623	1.10988	0.309542
MDC	Genotype63	56309.2	1664.48	33.8298	4.44165e-08
ENA-78	GenotypeWT	-922.444	809.149	-1.14002	0.297734
EGF	Genotype63	5143.55	171.057	30.0693	8.97479e-08
IL-5	GenotypeWT	790.556	625.242	1.2644	0.252981
I-309	(Intercept)	96868.1	1960.73	49.4041	4.61238e-09
TGF-beta 1	Genotype63	6073.05	207.389	29.2834	1.05105e-07
IL-8	TreatmentLPS	-8556.99	6644.84	-1.28776	0.245263
IL12-p40	GenotypeWT	-731.444	561.955	-1.30161	0.24079
IL-7	GenotypeWT	610.056	464.329	1.31385	0.236895
MIG	Genotype63	5991.61	205.501	29.1561	1.07872e-07
IL-1alpha	(Intercept)	5.25097e-13	298.127	1.76132e-15	1
Oncostatin M	Genotype63:TreatmentLPS	1083.06	776.71	1.39442	0.212636
MIP-1-delta	Genotype63:TreatmentLPS	-629.118	449.791	-1.39869	0.211414
G-CSF	Genotype63	4760.17	170.323	27.9479	1.38831e-07
M-CSF	GenotypeWT:TreatmentLPS	2387.59	1614.17	1.47914	0.189588
IL-4	GenotypeWT	391.056	254.069	1.53917	0.174687
IL-1beta	(Intercept)	68434.6	2833.87	24.1488	3.31328e-07
TNF-beta	GenotypeWT	-1484.78	954.549	-1.55547	0.170833
MIG	GenotypeWT	-322.555	205.501	-1.5696	0.167559
MIG	TreatmentLPS	-322.555	205.501	-1.5696	0.167559
M-CSF	Genotype63:TreatmentLPS	-2563.56	1614.17	-1.58816	0.16335
VEGF	Genotype63:TreatmentLPS	5803.94	3544.27	1.63756	0.152628
IL-2	(Intercept)	5534.11	141.081	39.2266	1.83393e-08
GRO-alpha	TreatmentLPS	853.619	519.791	1.64223	0.151649
IL-2	Genotype63	4997.55	199.518	25.0481	2.66562e-07
IL-4	Genotype63:TreatmentLPS	649.556	359.308	1.8078	0.120643
IL-7	TreatmentLPS	-889.611	464.329	-1.91591	0.103854
TNF-alpha	GenotypeWT	10807.1	5307.02	2.03637	0.087885
IL-3	(Intercept)	14845.1	717.746	20.6829	8.31281e-07
IFN-gamma	GenotypeWT	-1264.44	586.613	-2.1555	0.0745385
GRO	TreatmentLPS	10545.5	4830.8	2.18298	0.0717663
IFN-gamma	GenotypeWT:TreatmentLPS	1859.21	829.597	2.24111	0.0662463
TNF-beta	TreatmentLPS	-2173.61	954.549	-2.27711	0.0630496
IL-10	Genotype63	-140730	6011.56	-23.41	3.98552e-07
IL-4	(Intercept)	2240.11	179.654	12.469	1.62601e-05
VEGF	GenotypeWT:TreatmentLPS	8414.59	3544.27	2.37414	0.0552076
IL-15	GenotypeWT:TreatmentLPS	2832.71	1116.68	2.53673	0.044276
GRO-alpha	GenotypeWT:TreatmentLPS	-2262.02	735.096	-3.07717	0.0217416
IL-15	GenotypeWT	-2471.94	789.612	-3.13058	0.0203096
IL-1alpha	Genotype63	9863.17	421.615	23.3938	4.00195e-07
IL-5	(Intercept)	1925.61	442.113	4.35547	0.00479399
GRO-alpha	GenotypeWT	1841.67	519.791	3.54309	0.0121734
IL-15	Genotype63:TreatmentLPS	-3987.05	1116.68	-3.57045	0.0117778
IL-13	TreatmentLPS	-1435.11	398.495	-3.60133	0.0113484
MCP-2	TreatmentLPS	-9321.99	2577.83	-3.61621	0.0111476
TPO	GenotypeWT:TreatmentLPS	4729.61	1271.77	3.71893	0.0098648
IL-6	(Intercept)	187248	2859.01	65.4939	8.52126e-10
I-309	TreatmentLPS	-10635.5	2772.89	-3.83553	0.0086036
IL-1beta	Genotype63	88567.1	4007.7	22.0992	5.61201e-07
GRO	Genotype63:TreatmentLPS	-26888.6	6831.78	-3.93581	0.00766143
SDF-1	Genotype63:TreatmentLPS	-5884.56	1472.52	-3.99625	0.00714945
IL-8	Genotype63:TreatmentLPS	-38651.1	9397.23	-4.11303	0.00626504
IL-7	(Intercept)	889.611	328.33	2.7095	0.0351293
IL-1alpha	GenotypeWT:TreatmentLPS	-2520.28	596.254	-4.22686	0.00551926
IL12-p40	TreatmentLPS	-2420.61	561.955	-4.30748	0.0050513
M-CSF	TreatmentLPS	-4945.99	1141.39	-4.33329	0.00491103
I-309	Genotype63:TreatmentLPS	17323.9	3921.46	4.41773	0.00448188
IL-3	GenotypeWT:TreatmentLPS	6424.71	1435.49	4.47561	0.00421209
IL-8	(Intercept)	178399	4698.61	37.9685	2.22859e-08
G-CSF	GenotypeWT	797.667	170.323	4.68326	0.00338445
VEGF	Genotype63	54912.6	2506.17	21.9109	5.90446e-07
TARC	Genotype63	3010.55	145.725	20.6591	8.36989e-07
MCP-1	TreatmentLPS	-29627.5	5708.86	-5.18974	0.002035
IL-6	TreatmentLPS	-21150	4043.25	-5.23094	0.00195541
IL-10	(Intercept)	208508	4250.82	49.0512	4.81468e-09
TPO	GenotypeWT	-4729.61	899.274	-5.25937	0.00190257
TPO	TreatmentLPS	-4729.61	899.274	-5.25937	0.00190257
SCF	Genotype63:TreatmentLPS	-1603.05	295.158	-5.43117	0.00161572
PDGF-BB	Genotype63	-4205.95	219.482	-19.1631	1.30626e-06
IL-1beta	TreatmentLPS	-24290	4007.7	-6.06083	0.000914749
IL12-p40	(Intercept)	2420.61	397.362	6.0917	0.000890617
IL-2	Genotype63:TreatmentLPS	-1713.94	282.161	-6.07435	0.000904092
IL-6	GenotypeWT:TreatmentLPS	35061.1	5718.01	6.13169	0.000860423
MCP-3	GenotypeWT:TreatmentLPS	46158.6	7505.17	6.15024	0.00084682
IL-8	GenotypeWT:TreatmentLPS	59255.1	9397.23	6.30559	0.000742055
IL-1beta	GenotypeWT:TreatmentLPS	36596.1	5667.74	6.45691	0.000654053
IL-13	(Intercept)	1435.11	281.778	5.09305	0.00223663
IGF-1	Genotype63:TreatmentLPS	5208.44	785.095	6.63415	0.000565797
MCP-1	Genotype63:TreatmentLPS	54917.9	8073.55	6.80221	0.000494526
IL-15	TreatmentLPS	-5422.11	789.612	-6.8668	0.000469918
RANTES	Genotype63:TreatmentLPS	49358.9	7179.67	6.87482	0.000466962
Leptin	Genotype63	-8847.45	500.643	-17.6722	2.10799e-06
IL-15	(Intercept)	5422.11	558.34	9.71112	6.84408e-05
TNF-beta	Genotype63	13347.1	954.549	13.9826	8.34273e-06
MDC	GenotypeWT	12047.7	1664.48	7.23808	0.000353006
I-309	GenotypeWT:TreatmentLPS	28687.1	3921.46	7.31542	0.00033309
IFN-gamma	Genotype63	6978.55	586.613	11.8963	2.13532e-05
EGF	Genotype63:TreatmentLPS	1773.06	241.911	7.32938	0.000329634
IFN-gamma	(Intercept)	6662.61	414.798	16.0623	3.70035e-06
IL-13	Genotype63:TreatmentLPS	-4136.05	563.557	-7.3392	0.000327228
MCP-2	Genotype63:TreatmentLPS	-26903.1	3645.61	-7.37959	0.000317542
IL-1alpha	GenotypeWT	3235.17	421.615	7.67327	0.000256248
IL-7	Genotype63	5236.05	464.329	11.2766	2.90831e-05
Oncostatin M	GenotypeWT:TreatmentLPS	6051.44	776.71	7.79113	0.000235569
MCP-1	(Intercept)	202646	4036.77	50.1999	4.19156e-09
IL-7	Genotype63:TreatmentLPS	-5236.05	656.66	-7.97377	0.000207205
GRO-alpha	Genotype63:TreatmentLPS	-5911.78	735.096	-8.04219	0.000197609
IL-3	TreatmentLPS	-8176.99	1015.05	-8.05578	0.000195765
VEGF	TreatmentLPS	-20463	2506.17	-8.16503	0.000181638
M-CSF	GenotypeWT	-9496.44	1141.39	-8.32004	0.000163564
MCP-2	(Intercept)	82567.6	1822.8	45.2971	7.75452e-09
IFN-gamma	Genotype63:TreatmentLPS	-6978.55	829.597	-8.41199	0.000153827
IL-10	Genotype63:TreatmentLPS	72134.9	8501.63	8.48483	0.000146586
MCP-2	GenotypeWT:TreatmentLPS	30974.6	3645.61	8.49642	0.000145471
MCP-3	TreatmentLPS	-45331	5306.96	-8.5418	0.000141196
IL-10	GenotypeWT:TreatmentLPS	74009.1	8501.63	8.70528	0.000126958
MCP-3	(Intercept)	252818	3752.59	67.3716	7.19346e-10
Angiogenin	Genotype63:TreatmentLPS	9666.44	1099.72	8.78993	0.00012024
IL-4	TreatmentLPS	-2240.11	254.069	-8.81693	0.000118185
MCP-3	Genotype63:TreatmentLPS	67992.9	7505.17	9.05948	0.000101433
IL-13	Genotype63	4136.05	398.495	10.3792	4.68264e-05
GRO-alpha	Genotype63	5058.17	519.791	9.73114	6.7644e-05
M-CSF	(Intercept)	12148.6	807.087	15.0524	5.41826e-06
IL-5	TreatmentLPS	5743.01	625.242	9.18526	9.38356e-05
SDF-1	GenotypeWT:TreatmentLPS	13851.6	1472.52	9.40672	8.20009e-05
MCP-1	GenotypeWT	-53972.4	5708.86	-9.45415	7.96964e-05
MCP-1	GenotypeWT:TreatmentLPS	76770.6	8073.55	9.5089	7.71288e-05
IL-5	GenotypeWT:TreatmentLPS	-8459.18	884.226	-9.56676	7.45192e-05
MDC	(Intercept)	4.20078e-12	1176.97	3.56915e-15	1
I-309	Genotype63	25366.6	2772.89	9.14806	9.60115e-05
GRO	GenotypeWT	48972.6	4830.8	10.1376	5.35755e-05
MDC	Genotype63:TreatmentLPS	-24011.6	2353.94	-10.2006	5.17121e-05
IL-5	Genotype63:TreatmentLPS	-9073.56	884.226	-10.2616	4.998e-05
IL-4	Genotype63	2324.05	254.069	9.14732	9.60552e-05
MIG	(Intercept)	322.555	145.311	2.21975	0.068221
IL-1beta	Genotype63:TreatmentLPS	-59128.1	5667.74	-10.4324	4.54761e-05
IL-1beta	GenotypeWT	-43066.9	4007.7	-10.7461	3.83731e-05
IL-3	Genotype63:TreatmentLPS	15778.9	1435.49	10.992	3.36945e-05
Oncostatin M	GenotypeWT	-6051.44	549.217	-11.0183	3.32342e-05
RANTES	GenotypeWT:TreatmentLPS	80594.1	7179.67	11.2253	2.98572e-05
MIP-1-delta	(Intercept)	9066.11	224.895	40.3126	1.55761e-08
SCF	Genotype63	1603.05	208.709	7.68083	0.000254859
IFN-gamma	TreatmentLPS	-6662.61	586.613	-11.3578	2.79056e-05
IL-10	TreatmentLPS	-71323	6011.56	-11.8643	2.1689e-05
SDF-1	Genotype63	7620.55	1041.23	7.3188	0.000332248
PDGF-BB	GenotypeWT:TreatmentLPS	3740.94	310.394	12.0522	1.98029e-05
RANTES	(Intercept)	238376	3589.83	66.4029	7.84566e-10
TGF-beta 1	GenotypeWT:TreatmentLPS	3575.33	293.292	12.1903	1.8538e-05
IGF-1	GenotypeWT:TreatmentLPS	9803.49	785.095	12.487	1.61245e-05
EGF	GenotypeWT:TreatmentLPS	3042.44	241.911	12.5767	1.5468e-05
RANTES	TreatmentLPS	-64301.5	5076.79	-12.6658	1.48469e-05
IL-3	GenotypeWT	-13088.9	1015.05	-12.8949	1.33771e-05
SCF	(Intercept)	7039.61	147.579	47.7006	5.69064e-09
MCP-3	GenotypeWT	-73777.4	5306.96	-13.902	8.62916e-06
IGF-1	Genotype63	-3948.45	555.146	-7.11245	0.000388355
MIP-1-delta	GenotypeWT:TreatmentLPS	6495.82	449.791	14.4419	6.90583e-06
TARC	Genotype63:TreatmentLPS	-3010.55	206.087	-14.6082	6.45811e-06
Angiogenin	GenotypeWT:TreatmentLPS	16078.6	1099.72	14.6207	6.42588e-06
SDF-1	(Intercept)	56181.6	736.26	76.3067	3.40999e-10
Leptin	GenotypeWT:TreatmentLPS	10600.3	708.017	14.9719	5.59147e-06
G-CSF	GenotypeWT:TreatmentLPS	-3797.9	240.873	-15.7672	4.12645e-06
SDF-1	TreatmentLPS	-16709.5	1041.23	-16.0478	3.71997e-06
Oncostatin M	TreatmentLPS	-8948.11	549.217	-16.2925	3.40322e-06
Leptin	Genotype63:TreatmentLPS	11584.9	708.017	16.3625	3.3184e-06
TARC	(Intercept)	9196.61	103.043	89.2498	1.33291e-10
IL-1alpha	Genotype63:TreatmentLPS	-9863.17	596.254	-16.5419	3.11215e-06
PDGF-BB	GenotypeWT	-3740.94	219.482	-17.0445	2.60912e-06
TGF-beta 1	GenotypeWT	-3566.44	207.389	-17.1969	2.47571e-06
IGF-1	TreatmentLPS	-9803.49	555.146	-17.6593	2.11705e-06
MCP-1	Genotype63	39526.1	5708.86	6.92363	0.000449425
TGF-beta 1	(Intercept)	7995.61	146.646	54.5232	2.55575e-09
IL-8	GenotypeWT	-117926	6644.84	-17.747	2.05607e-06
ENA-78	GenotypeWT:TreatmentLPS	-20323.9	1144.31	-17.7608	2.04662e-06
EGF	GenotypeWT	-3042.44	171.057	-17.7862	2.02948e-06
Angiogenin	TreatmentLPS	-13937.5	777.617	-17.9233	1.9395e-06
RANTES	GenotypeWT	-91448.4	5076.79	-18.013	1.88317e-06
TNF-alpha	(Intercept)	309.111	3752.63	0.0823718	0.93703
G-CSF	TreatmentLPS	3120.12	170.323	18.3188	1.70494e-06
MCP-2	GenotypeWT	-47911.9	2577.83	-18.5861	1.56507e-06
IL12-p40	Genotype63	3222.05	561.955	5.73365	0.00122235
VEGF	GenotypeWT	-48191.9	2506.17	-19.2293	1.27988e-06
EGF	TreatmentLPS	-3318.11	171.057	-19.3977	1.21552e-06
TNF-beta	(Intercept)	2173.61	674.968	3.22032	0.01813
IL-2	GenotypeWT:TreatmentLPS	5534.11	282.161	19.6133	1.13855e-06
MIG	Genotype63:TreatmentLPS	-5991.61	290.623	-20.6165	8.47296e-07
IL-5	Genotype63	3188.55	625.242	5.09971	0.00222203
TGF-beta 1	Genotype63:TreatmentLPS	-6073.05	293.292	-20.7065	8.25692e-07
ENA-78	Genotype63:TreatmentLPS	-24191.7	1144.31	-21.1408	7.3007e-07
EGF	(Intercept)	3318.11	120.955	27.4325	1.55116e-07
I-309	GenotypeWT	-59127.9	2772.89	-21.3236	6.93737e-07
IL-15	Genotype63	3987.05	789.612	5.04938	0.00233506
IL-3	Genotype63	-3974.45	1015.05	-3.91553	0.00784227
ENA-78	TreatmentLPS	18844	809.149	23.2887	4.11047e-07
Oncostatin M	Genotype63	1810.05	549.217	3.2957	0.016496
IGF-1	(Intercept)	12990.1	392.547	33.0918	5.06698e-08
IGF-1	GenotypeWT	-12990.1	555.146	-23.3995	3.99615e-07
ENA-78	Genotype63	1916.05	809.149	2.36799	0.0556735
Leptin	GenotypeWT	-11733.9	500.643	-23.4377	3.95753e-07
MIP-1-delta	GenotypeWT	-7741.44	318.05	-24.3403	3.16123e-07
MIP-1-delta	TreatmentLPS	-7820.49	318.05	-24.5889	2.97586e-07
Angiogenin	(Intercept)	46059.6	549.859	83.7663	1.94946e-10
MCP-3	Genotype63	-9467.95	5306.96	-1.78406	0.124673
IL-2	GenotypeWT	-5534.11	199.518	-27.7374	1.45228e-07
IL-2	TreatmentLPS	-5534.11	199.518	-27.7374	1.45228e-07
Leptin	TreatmentLPS	-13937.5	500.643	-27.8392	1.42093e-07
RANTES	Genotype63	-7133.45	5076.79	-1.40511	0.209592
Oncostatin M	(Intercept)	8948.11	388.355	23.0411	4.38001e-07
GRO	Genotype63	-6646.95	4830.8	-1.37595	0.217988
SCF	GenotypeWT:TreatmentLPS	8622.71	295.158	29.2138	1.06607e-07
TPO	Genotype63	1157.55	899.274	1.28721	0.245444
GM-CSF	GenotypeWT	4725.17	158.883	29.7399	9.58417e-08
IL-6	Genotype63	-4800.95	4043.25	-1.1874	0.279943
TPO	(Intercept)	4729.61	635.883	7.43787	0.000304141
PDGF-BB	Genotype63:TreatmentLPS	9340.56	310.394	30.0926	8.9334e-08
IL-10	GenotypeWT	-189888	6011.56	-31.5872	6.68962e-08
G-CSF	Genotype63:TreatmentLPS	-7880.28	240.873	-32.7155	5.42512e-08
SCF	GenotypeWT	-6836.44	208.709	-32.7559	5.38525e-08
IL-6	GenotypeWT	-133684	4043.25	-33.0635	5.09295e-08
VEGF	(Intercept)	85385.6	1772.13	48.1824	5.35834e-09
SCF	TreatmentLPS	-7039.61	208.709	-33.7294	4.52122e-08
MIP-1-delta	Genotype63	-359.445	318.05	-1.13015	0.301556
PDGF-BB	TreatmentLPS	-8249.61	219.482	-37.5868	2.36734e-08
TGF-beta 1	TreatmentLPS	-7995.61	207.389	-38.5537	2.03383e-08
TARC	GenotypeWT:TreatmentLPS	8187.21	206.087	39.727	1.70006e-08
PDGF-BB	(Intercept)	8249.61	155.197	53.1558	2.97566e-09
MCP-2	Genotype63	2204.05	2577.83	0.855003	0.425368
GM-CSF	TreatmentLPS	7144.62	158.883	44.9679	8.10052e-09
GM-CSF	GenotypeWT:TreatmentLPS	-10446	224.694	-46.4899	6.63729e-09
M-CSF	Genotype63	667.055	1141.39	0.584421	0.580231
IL-8	Genotype63	1071.05	6644.84	0.161186	0.877237
Leptin	(Intercept)	15071.1	354.008	42.5728	1.12394e-08
SDF-1	GenotypeWT	-51650.4	1041.23	-49.6052	4.50154e-09
TARC	GenotypeWT	-7719.94	145.725	-52.9759	3.03667e-09
Angiogenin	GenotypeWT	-45639.4	777.617	-58.6914	1.64389e-09
TARC	TreatmentLPS	-9196.61	145.725	-63.1091	1.06423e-09
GM-CSF	Genotype63:TreatmentLPS	-14559.3	224.694	-64.796	9.0863e-10
