# Supplementary figures and images for: Functional and Multi-Omics Analysis of an Optimized CRISPR-Mediated FURIN Depletion in Cultured Pro-Monocytic Cells
Source: Preprints.org preprint supplement (doi:10.20944/preprints202312.0178.v1), 2023-12-04

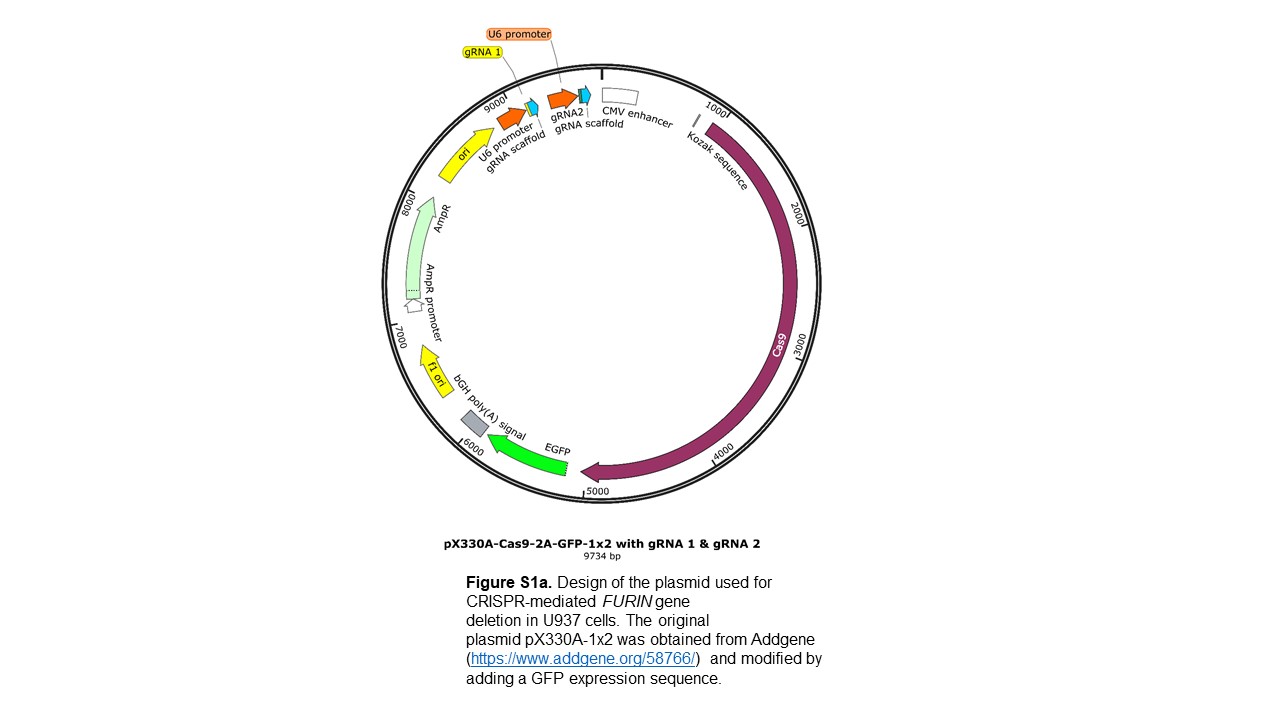

Supplement: Supplementary file 2 [file supplementary › Figure_S1a.jpg]

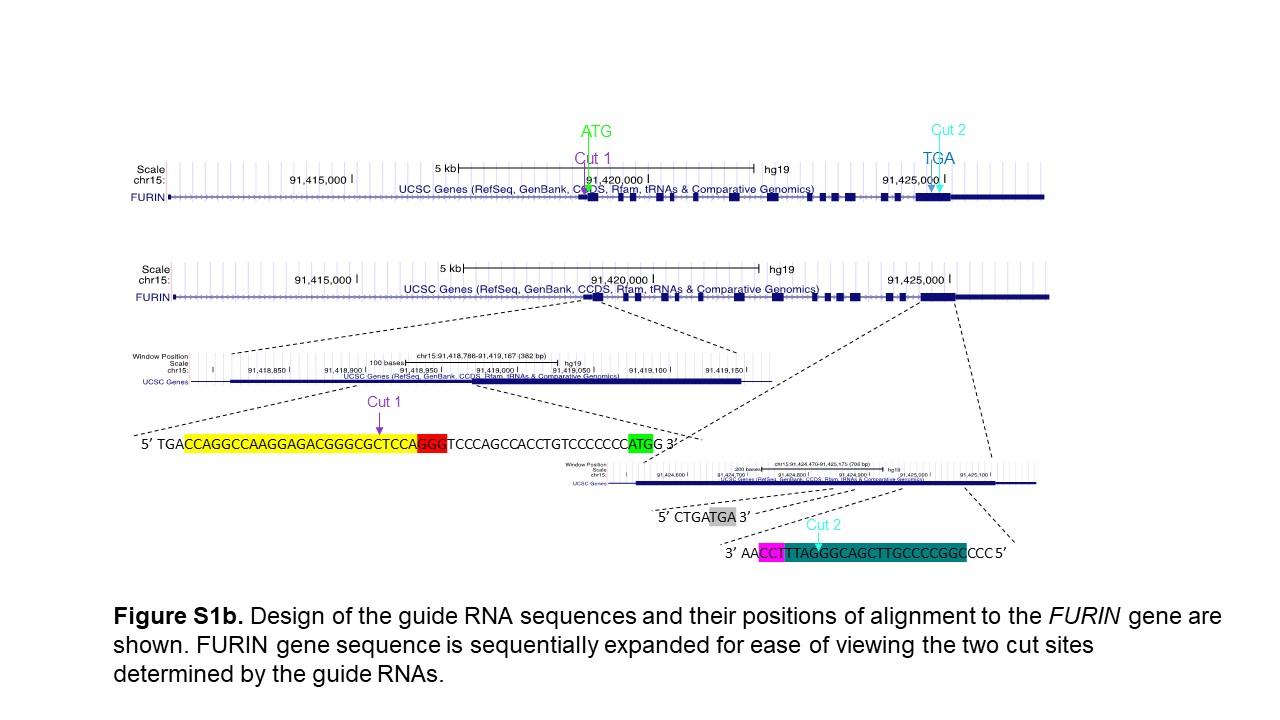

Supplement: Supplementary file 2 [file supplementary › Figure_S1b.jpg]

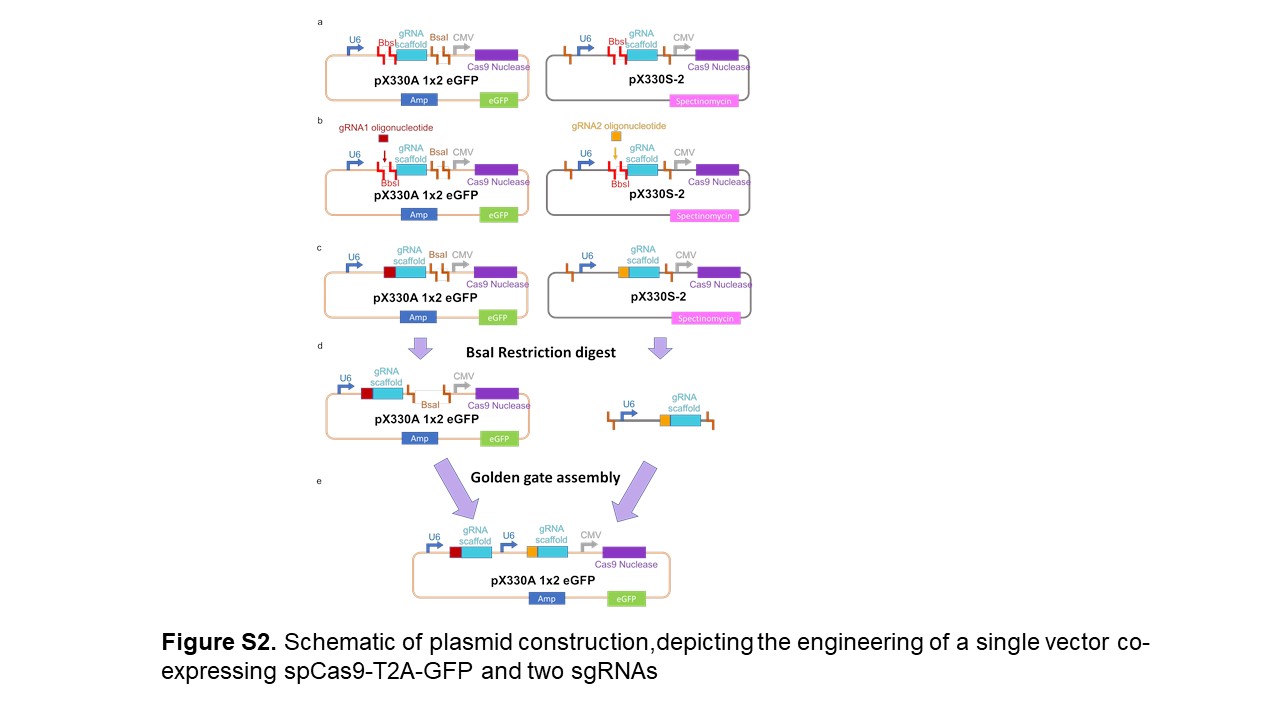

Supplement: Supplementary file 2 [file supplementary › Figure_S2.jpg]

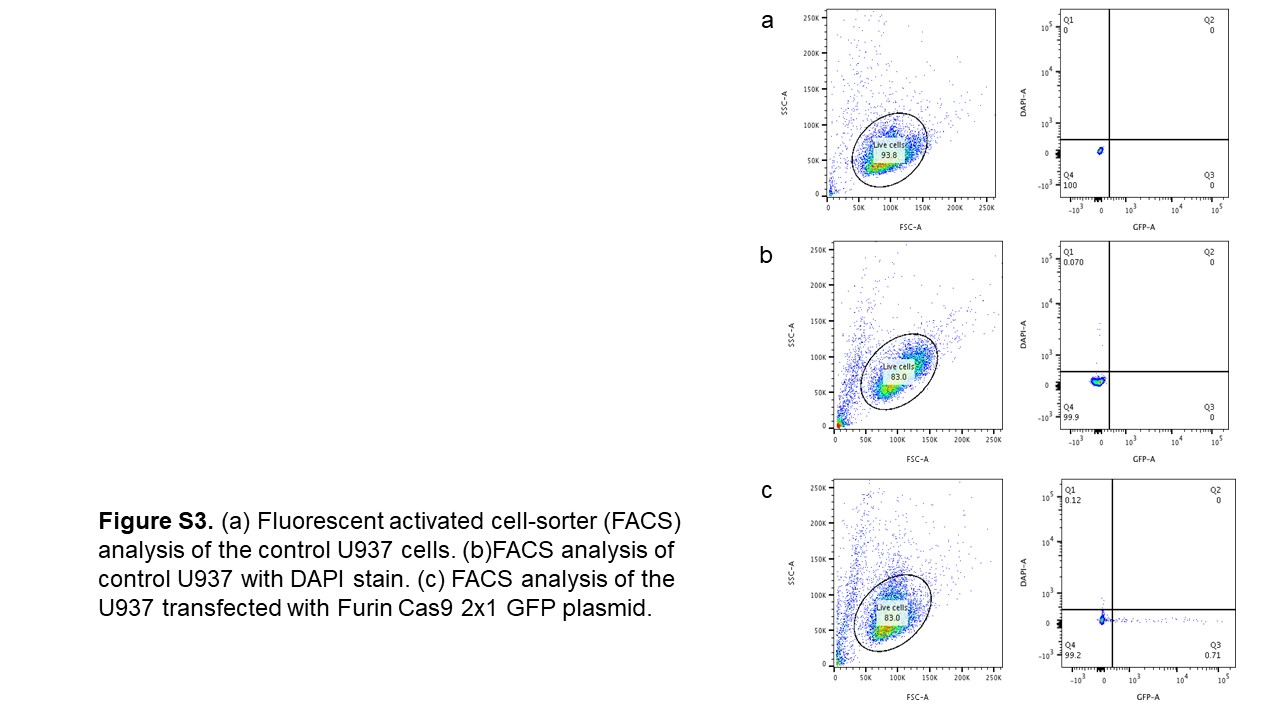

Supplement: Supplementary file 2 [file supplementary › Figure_S3.jpg]

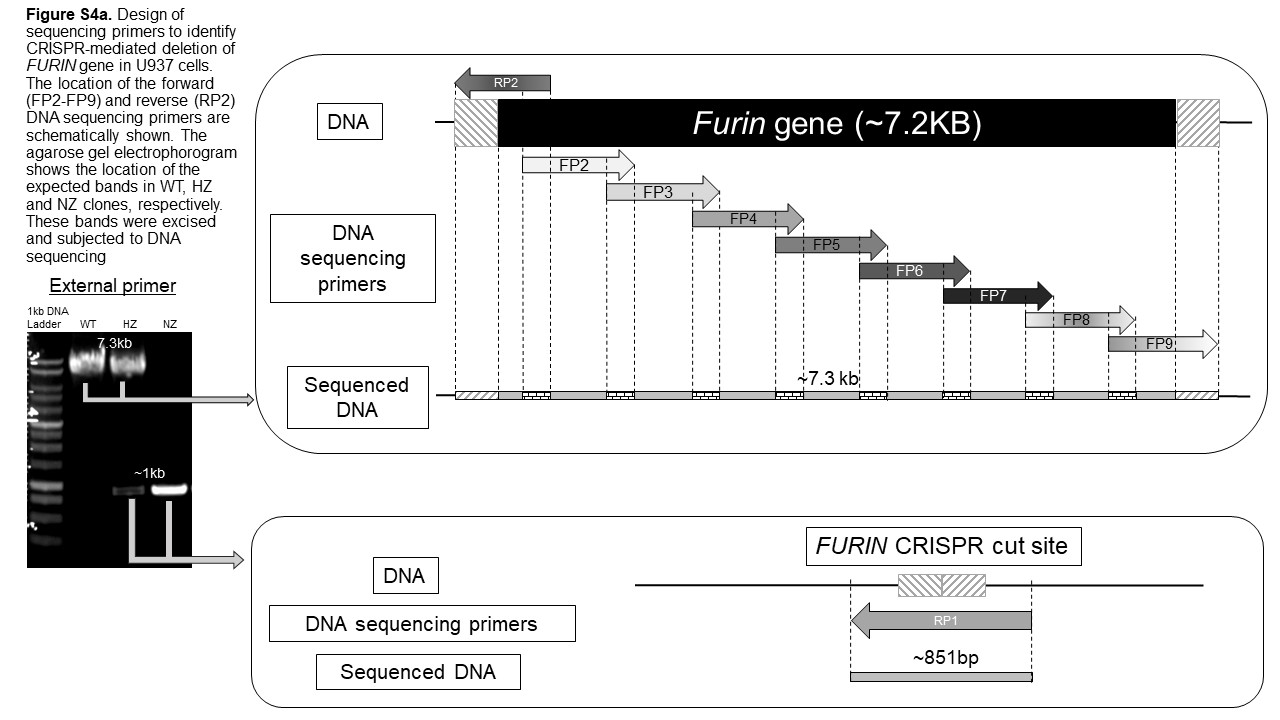

Supplement: Supplementary file 2 [file supplementary › Figure_S4a.jpg]

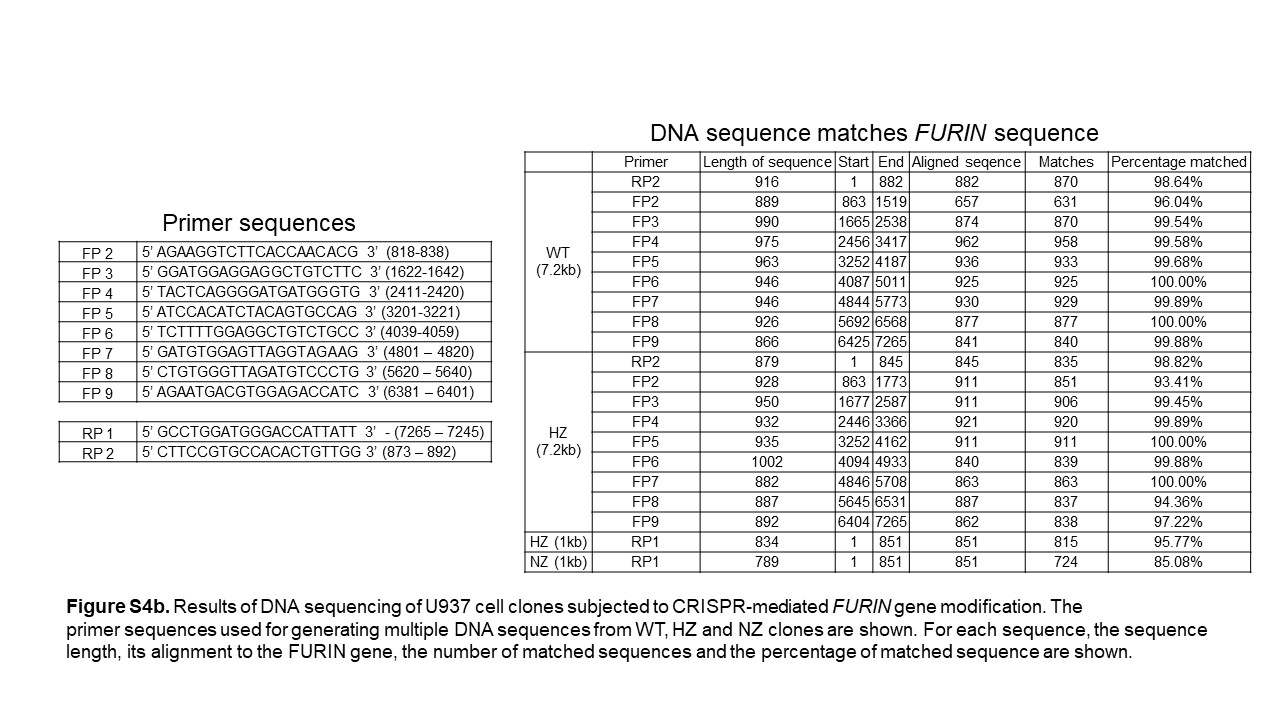

Supplement: Supplementary file 2 [file supplementary › Figure_S4b.jpg]

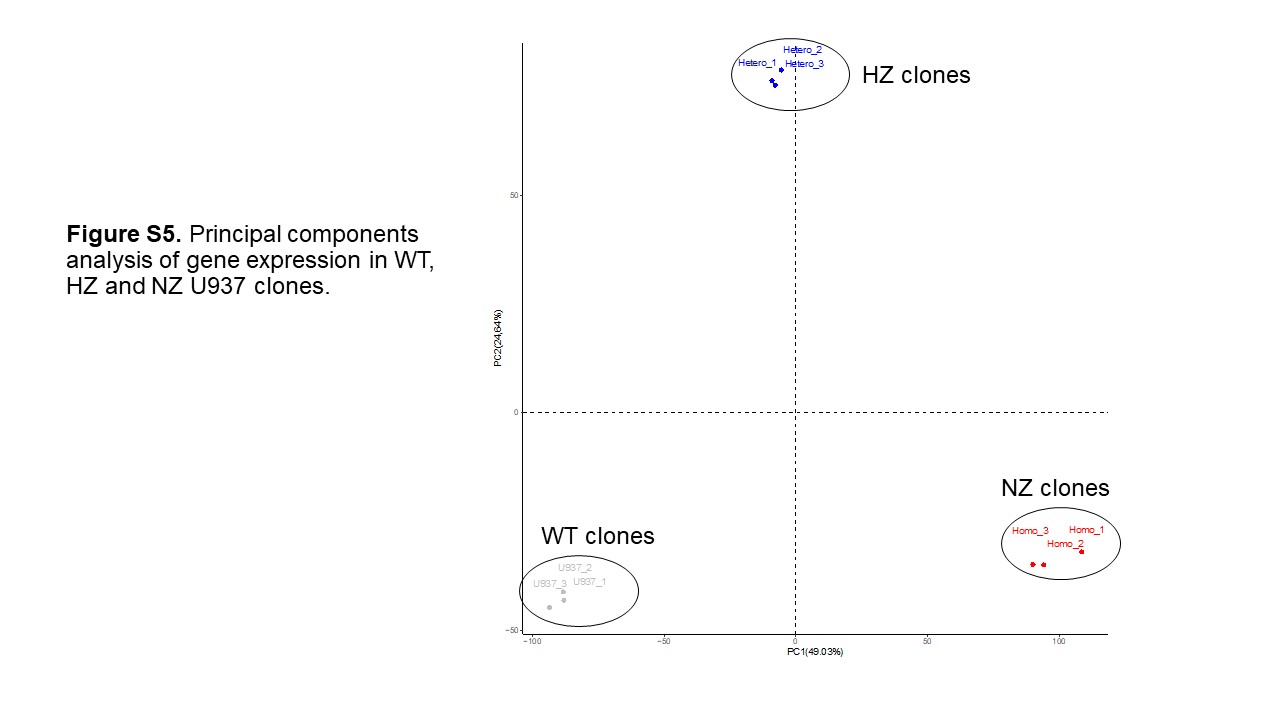

Supplement: Supplementary file 2 [file supplementary › Figure_S5.jpg]
